# Supplementary material
Source: MDPI journal article supplement (https://www.mdpi.com/2073-4395/13/3/623)
Supplement: s1 [file s1]

Table S9 Summary of the OJIP test parameters used in this study

| Group                             | Symbols                          | Meaning                                                                                                                                |
|-----------------------------------|----------------------------------|----------------------------------------------------------------------------------------------------------------------------------------|
| Extracted fluorescence parameters | F <sub>o</sub>                   | Minimal fluorescence intensity                                                                                                         |
|                                   | F <sub>m</sub>                   | Maximal fluorescence intensity                                                                                                         |
|                                   | F <sub>v</sub>                   | Maximal variable fluorescence                                                                                                          |
| Phenomenological energy fluxes    | ABS/RC                           | Absorbed energy flux in antenna chlorophylls per PSII reaction center (a measure of PSII apparent antenna size)                        |
|                                   | D <sub>Io</sub> /RC              | Heat dissipation of excitation energy by PSII reaction center                                                                          |
|                                   | T <sub>Ro</sub> /RC              | Trapped energy flux per RC                                                                                                             |
|                                   | E <sub>To</sub> /RC              | Electron transport flux further than QA <sup>-</sup> per PSII reaction center                                                          |
|                                   | R <sub>Eo</sub> /RC              | Electron flux reducing end electron acceptors at the PSI acceptor side, per PSII reaction center                                       |
|                                   | ABS/CS <sub>m</sub>              | Absorption flux of photons per leaf cross-section (CS)                                                                                 |
|                                   | D <sub>Io</sub> /CS <sub>m</sub> | Dissipation flux per CS                                                                                                                |
|                                   | T <sub>Ro</sub> /CS <sub>m</sub> | Maximal trapping rate of excitons per CS                                                                                               |
|                                   | E <sub>To</sub> /CS <sub>m</sub> | Electron transport per CS                                                                                                              |
|                                   | R <sub>Eo</sub> /CS <sub>m</sub> | Reduction of end acceptors per CS                                                                                                      |
| Performance index                 | RC/CS <sub>o</sub>               | Density of active PSII reaction centers                                                                                                |
|                                   | PI <sub>ABS</sub>                | Performance index (potential) for energy conservation from photons absorbed by PSII to the reduction of intersystem electron acceptors |
|                                   | PI <sub>Total</sub>              | Performance index on CS                                                                                                                |
