# Supplementary material
Source: MDPI journal article supplement (https://www.mdpi.com/2073-4395/13/3/623)
Supplement: s1 [file s1]

Archive with 10 entries (10 files):
- Figure S1.jpg
- Table S1.xlsx
- Table S2.xlsx
- Table S3.xlsx
- Table S4.xlsx
- Table S5.xlsx
- Table S6.xlsx
- Table S7.xlsx
- Table S8.xlsx
- Table S9.pdf
