# Supplementary material
Source: MDPI journal article supplement (https://www.mdpi.com/2073-4395/13/3/623)
Supplement: s1 [file s1 › Table S3.xlsx]

## Sheet: Sheet1
Gene ID	Primer Names	Primer Sequences (5'-3')
β-actin	ZjACT-F	GGTCCTCTTCCAGCCATCCTTC
	ZjACT-R	GTGCAAGGGCAGTGATCTCCTTG
Zjn_sc03174.1.g00010.1.am.mk	1-F	CCATCCCACCCTCGACTGCT
	1-R	TTGATCCGCTCCGCCTCAC
Zjn_sc00001.1.g03760.1.sm.mkhc	2-F	TGCTTCTTCTGATATGCCTATTGC
	2-R	TTGACAGGTGTTGCCTCTTGG
Zjn_sc00003.1.g10610.1.sm.mkhc	3-F	TCTACGGCGGGAGGATGGTG
	3-R	CTTCAGTGGCGAGCCTGTTCTT
Zjn_sc00059.1.g01300.1.sm.mk	4-F	CCGTTCTTCAAGCCCGAGTC
	4-R	GGGTGGAGGTTGGTGTTGCT
Zjn_sc00003.1.g01950.1.sm.mk	5-F	CTGTGGGTATGGGTTCCTTGACC
	5-R	CGGGAAGACTTGTGGTGGTGC
Zjn_sc00138.1.g00080.1.am.mk	6-F	CAGGTGCGAGCGGATGAGAT
	6-R	ACCAGCCGAAACGAGATGAGAC
Zjn_sc00184.1.g00360.1.am.mk	7-F	AGCGAGTTCACCGTCAAGTC
	7-R	CCTGGGGCGTTGAGGTAC
Zjn_sc00152.1.g00120.1.sm.mkhc	8-F	CGCTCTGCGTCAAGAGGCTAG
	8-R	GCATTATGATAGTTGCGTTGGGAT
PB.16272	9-F	GCCCATGTATGAACAAGGATTGA
	9-R	ACTGCGGAGGAAATTAGGTGAAG
PB.4217	10-F	GGGCGATGGGTTGATGATACAA
	10-R	AAGCGAGATTCCGAAGCGACA
