# Supplementary material
Source: MDPI journal article supplement (https://www.mdpi.com/2073-4395/13/3/623)
Supplement: s1 [file s1 › Table S4.xlsx]

## Sheet: total
Query_id	Subject_id	Regulated (M vs S)	Identity	Subject_Function	Effect	E_value
Zjn_sc08677.1.g00010.1.sm.mk	AT4G37000.1	up	88/169(52%)	Chlorophyll degradation	delay	6e-40
Zjn_sc00004.1.g06980.1.am.mk	LOC_Os04g46990.1	up	291/455(63%)	Hormone response pathway	delay	1e-171
Zjn_sc00090.1.g01400.1.sm.mk	AT1G52340.1	down	135/267(50%)	Hormone response pathway:ABA	delay	1e-66
Zjn_sc00004.1.g01860.1.am.mk	AT4G16110.1	up	55/142(38%)	Hormone response pathway:CK	delay	1e-15
Zjn_sc00006.1.g02730.1.am.mk	AT1G59940.1	down	34/94(36%)	Hormone response pathway:CK	delay	3e-10
Zjn_sc00009.1.g00920.1.sm.mk	AT3G57040.1	down	60/116(51%)	Hormone response pathway:CK	delay	1e-21
Zjn_sc00020.1.g00850.1.sm.mkhc	AT2G41310.1	down	76/186(40%)	Hormone response pathway:CK	delay	6e-32
Zjn_sc00028.1.g02890.1.sm.mkhc	AT2G41310.1	down	42/55(76%)	Hormone response pathway:CK	delay	6e-17
Zjn_sc00034.1.g01130.1.sm.mkhc	AT2G41310.1	down	90/178(50%)	Hormone response pathway:CK	delay	6e-38
Zjn_sc00058.1.g01990.1.am.mk	AT1G59940.1	down	70/169(41%)	Hormone response pathway:CK	delay	1e-25
Zjn_sc00018.1.g05240.1.am.mk	X14058.1	down	33/74(44%)	Hormone response pathway:NO	delay	7e-13
Zjn_sc00066.1.g03420.1.am.mk	X14058.1	up	432/626(69%)	Hormone response pathway:NO	delay	0
Zjn_sc00069.1.g02370.1.am.mkhc	M60055.1	down	99/376(26%)	Hormone response pathway:SA	delay	2e-11
Zjn_sc00013.1.g03240.1.sm.mk	AT1G04010.1	down	72/258(27%)	Lipid/Carbohydrate metabolism	delay	1e-11
Zjn_sc00002.1.g06750.1.sm.mkhc	AT2G39770.1	up	279/324(86%)	Lipid/Carbohydrate metabolism:vitamin C	delay	1e-166
Zjn_sc00003.1.g05360.1.sm.mkhc	AT2G39770.1	up	278/325(85%)	Lipid/Carbohydrate metabolism:vitamin C	delay	1e-166
Zjn_sc00013.1.g02100.1.sm.mkhc	AB180689.1	up	324/386(83%)	Nutrient recycling	delay	0
Zjn_sc00028.1.g00990.1.am.mkhc	AT1G21400.1	up	281/390(72%)	Nutrient recycling	delay	1e-171
Zjn_sc00002.1.g08220.1.sm.mkhc	AT2G31260.1	up	44/58(75%)	Nutrient recycling:Autophagy	delay	2e-22
Zjn_sc00004.1.g10410.1.sm.mkhc	AT1G62040.1	up	103/118(87%)	Nutrient recycling:autophagy	delay	8e-57
Zjn_sc00007.1.g02260.1.sm.mkhc	AT3G62770.1	up	51/159(32%)	Nutrient recycling:Autophagy	delay	1e-10
Zjn_sc00009.1.g01610.1.sm.mkhc	AT3G62770.1	up	188/274(68%)	Nutrient recycling:Autophagy	delay	1e-103
Zjn_sc00036.1.g02310.1.sm.mkhc	AT5G45900.1	up	150/422(35%)	Nutrient recycling:Autophagy	delay	3e-52
Zjn_sc00063.1.g00260.1.sm.mkhc	AT1G62040.1	up	104/115(90%)	Nutrient recycling:autophagy	delay	5e-57
Zjn_sc00112.1.g00460.1.sm.mkhc	AT1G62040.1	up	105/115(91%)	Nutrient recycling:autophagy	delay	4e-58
Zjn_sc00002.1.g09400.1.sm.mkhc	AT1G32230.2	up	125/508(24%)	Others:cell death	delay	2e-34
Zjn_sc00014.1.g04820.1.am.mkhc	AT5G15410.1	down	329/477(68%)	Others:defense	delay	0
Zjn_sc00028.1.g01620.1.am.mkhc	U86130.1	down	71/126(56%)	Redox regulation	delay	5e-34
Zjn_sc00058.1.g02840.1.am.mk	U86130.1	down	48/78(61%)	Redox regulation	delay	4e-26
PB.7417	AT4G09010.1	down	73/95(76%)	Redox regulation:ROS	delay	2e-39
Zjn_sc00007.1.g05260.1.sm.mk	AT1G70170.1	up	184/339(54%)	Signal transduction	delay	1e-91
Zjn_sc00026.1.g02580.1.am.mk	AT5G25620.2	down	97/217(44%)	Signal transduction:Auxin	delay	1e-47
Zjn_sc00036.1.g00830.1.am.mk	AT5G25620.2	down	203/347(58%)	Signal transduction:Auxin	delay	1e-109
Zjn_sc00043.1.g02780.1.sm.mk	AT5G25620.2	down	137/378(36%)	Signal transduction:Auxin	delay	5e-54
Zjn_sc00005.1.g05790.1.sm.mkhc	Y12618.1	down	114/238(47%)	Signal transduction:Calcium signal pathway	delay	4e-43
Zjn_sc00013.1.g09820.1.am.mkhc	Y12618.1	up	70/167(41%)	Signal transduction:Calcium signal pathway	delay	6e-28
Zjn_sc00016.1.g02800.1.sm.mk	LOC_Os05g10670.1	down	284/413(68%)	Transcription regulation	delay	1e-148
Zjn_sc00024.1.g02880.1.sm.mk	LOC_Os05g10670.1	down	308/416(74%)	Transcription regulation	delay	1e-166
Zjn_sc00028.1.g03570.1.am.mk	HQ324233.1	down	139/403(34%)	Transcription regulation	delay	3e-52
Zjn_sc00028.1.g03840.1.am.mk	AT2G40750.1	down	48/150(32%)	Transcription regulation	delay	9e-15
Zjn_sc00141.1.g00400.1.sm.mk	HQ324235.1	down	142/442(32%)	Transcription regulation	delay	5e-48
Zjn_sc00027.1.g04030.1.am.mk	NM_001048811.1	down	97/248(39%)	Transcription regulation:CCCH-type zinc finge	delay	3e-36
Zjn_sc00007.1.g09230.1.am.mk	AT4G25470.1	down	108/226(47%)	Transcription regulation:DREB subfamily A-1 of ERF/AP2	delay	6e-45
Zjn_sc00022.1.g05590.1.am.mk	AT4G25470.1	down	107/223(47%)	Transcription regulation:DREB subfamily A-1 of ERF/AP2	delay	1e-43
Zjn_sc00016.1.g05180.1.am.mkhc	NM_001111966.2	up	126/248(50%)	Transcriptional regulation:HB(homeobox)	delay	4e-65
Zjn_sc00008.1.g00880.1.am.mk	AT5G13790.1	up	68/153(44%)	Transcriptional regulation:MADS	delay	2e-25
Zjn_sc00135.1.g00200.1.sm.mk	AT5G45890.1	up	59/163(36%)	Protein degradation/modification	No effect	1e-21
Zjn_sc00108.1.g00190.1.sm.mkhc	AT5G43860.1	down	144/310(46%)	Chlorophyll degradation	normal	2e-77
Zjn_sc00088.1.g00080.1.sm.mk	AT5G17860.1	up	254/570(44%)	Calcium exchanger	promote	1e-129
Zjn_sc00088.1.g00620.1.sm.mk	AT5G17860.1	up	92/197(46%)	Calcium exchanger	promote	1e-42
Zjn_sc00014.1.g07760.1.sm.mkhc	AT3G44880.1	down	180/525(34%)	Chlorophyll degradation	promote	1e-70
Zjn_sc00015.1.g08340.1.am.mkhc	AT1G04620.1	down	81/143(56%)	Chlorophyll degradation	promote	2e-37
Zjn_sc00050.1.g01110.1.am.mk	GQ889424.1	up	216/277(77%)	Chlorophyll degradation	promote	1e-122
Zjn_sc00122.1.g00640.1.am.mk	GQ889424.1	up	216/275(78%)	Chlorophyll degradation	promote	1e-125
Zjn_sc00133.1.g00110.1.sm.mkhc	AT5G15250.1	down	169/450(37%)	Chlorophyll degradation	promote	1e-75
Zjn_sc00009.1.g05770.1.am.mk	AT2G36270.1	up	162/434(37%)	Hormone response pathway:ABA	promote	2e-51
Zjn_sc00039.1.g01200.1.sm.mk	AT3G19290.2	down	105/207 (50%)	Hormone response pathway:ABA	promote	6e-38
Zjn_sc00047.1.g02540.1.am.mk	AT1G01360.1	up	82/179(45%)	Hormone response pathway:ABA	promote	2e-38
Zjn_sc00069.1.g03270.1.sm.mk	AT1G01360.1	up	86/177(48%)	Hormone response pathway:ABA	promote	2e-38
Zjn_sc00009.1.g11740.1.am.mkhc	AT1G59750.2	down	64/196(32%)	Hormone response pathway:Auxin	promote	4e-17
Zjn_sc00045.1.g04180.1.sm.mk	AT1G19220.1	up	101/292(34%)	Hormone response pathway:Auxin	promote	5e-36
Zjn_sc00058.1.g02020.1.sm.mkhc	AT1G59750.3	down	81/120(67%)	Hormone response pathway:Auxin	promote	2e-41
Zjn_sc00003.1.g01950.1.sm.mk	AT2G27050.1	up	279/516(54%)	Hormone response pathway:ET	promote	1e-144
Zjn_sc00015.1.g05400.1.sm.mkhc	AT3G45140.1	up	390/744(52%)	Hormone response pathway:JA	promote	0
Zjn_sc00045.1.g01630.1.am.mk	AT3G45140.1	down	367/644(56%)	Hormone response pathway:JA	promote	0
Zjn_sc00075.1.g00380.1.sm.mk	AT1G55020.1	down	132/246(53%)	Hormone response pathway:JA	promote	1e-75
Zjn_sc00005.1.g07950.1.sm.mkhc	AT5G48880.3	up	96/270(35%)	Hormone response pathway:JA biosynthesis	promote	3e-31
Zjn_sc00011.1.g07790.1.sm.mkhc	AT1G09530.1	up	102/398(25%)	light signaling	promote	8e-16
Zjn_sc00102.1.g00170.1.sm.mkhc	AT1G09530.1	down	72/181(39%)	light signaling	promote	2e-22
Zjn_sc00101.1.g00360.1.sm.mkhc	AT5G64440.1	up	148/402(36%)	Lipid/Carbohydrate metabolism	promote	1e-66
Zjn_sc00125.1.g00260.1.am.mk	AT5G64440.1	down	110/437(25%)	Lipid/Carbohydrate metabolism	promote	5e-23
Zjn_sc00015.1.g04830.1.sm.mkhc	AF251068.2	up	629/754(83%)	Lipid/Carbohydrate metabolism:degradation of digalactosyl diacylglycerol	promote	0
Zjn_sc00012.1.g09470.1.sm.mkhc	AT4G15530.6	down	670/846(79%)	Nutrient recycling:nitrogen remobilization	promote	0
Zjn_sc00025.1.g01280.1.sm.mkhc	AT4G15530.6	down	695/883(78%)	Nutrient recycling:nitrogen remobilization	promote	0
Zjn_sc00001.1.g07470.1.sm.mkhc	AT4G19890.1	down	93/315(29%)	Others	promote	5e-33
Zjn_sc00003.1.g01160.1.am.mk	AT4G19890.1	down	104/375(27%)	Others	promote	2e-38
Zjn_sc00013.1.g09010.1.sm.mkhc	AT2G21660.2	down	20/55(36%)	Others	promote	7e-08
Zjn_sc00015.1.g07770.1.sm.mkhc	AT2G21660.2	down	36/83(43%)	Others	promote	3e-12
Zjn_sc00017.1.g02800.1.sm.mk	AT4G19890.1	down	93/346(26%)	Others	promote	2e-36
Zjn_sc00020.1.g00660.1.sm.mk	AT4G19890.1	down	94/333(28%)	Others	promote	8e-40
Zjn_sc00030.1.g02610.1.am.mkhc	AT4G19890.1	down	46/169(27%)	Others	promote	2e-16
Zjn_sc00049.1.g03000.1.am.mkhc	AT4G19890.1	down	69/290(23%)	Others	promote	4e-19
Zjn_sc00064.1.g00690.1.am.mkhc	AT1G32080.1	down	283/403(70%)	Others:cell death	promote	1e-159
Zjn_sc00064.1.g00710.1.am.mkhc	AT1G32080.1	down	126/175(72%)	Others:cell death	promote	4e-71
Zjn_sc00027.1.g03780.1.sm.mk	AJ310379.1	up	72/142(50%)	Others:Defense and cell rescue mechanisms	promote	1e-30
Zjn_sc00027.1.g03790.1.am.mk	AJ310379.1	down	49/142(34%)	Others:Defense and cell rescue mechanisms	promote	2e-08
Zjn_sc00029.1.g05830.1.am.mk	AJ310379.1	up	25/42(59%)	Others:Defense and cell rescue mechanisms	promote	5e-08
Zjn_sc00007.1.g09280.1.sm.mk	AT1G58340.1	up	266/460(57%)	Others:drug transmembrane transport	promote	1e-151
Zjn_sc00013.1.g10510.1.sm.mk	AT1G58340.1	up	165/459(35%)	Others:drug transmembrane transport	promote	1e-83
Zjn_sc00023.1.g00660.1.am.mk	AT1G58340.1	down	266/469(56%)	Others:drug transmembrane transport	promote	1e-151
Zjn_sc00069.1.g03410.1.am.mk	AT1G58340.1	up	266/457(58%)	Others:drug transmembrane transport	promote	1e-153
Zjn_sc00029.1.g05430.1.sm.mk	AT4G29130.1	down	130/295(44%)	Others:Glucose	promote	3e-60
Zjn_sc00009.1.g05080.1.sm.mk	AT5G65010.1	up	42/105(40%)	Protein degradation/modification	promote	4e-08
Zjn_sc00112.1.g00190.1.sm.mkhc	AT4G30520.1	up	132/316(41%)	Protein degradation/modification	promote	1e-55
Zjn_sc00018.1.g03100.1.am.mk	AT4G34160.1	up	104/276(37%)	Signal transduction:Cell cycle regulation	promote	4e-38
Zjn_sc00075.1.g00370.1.sm.mk	EU195885.2	down	254/568(44%)	Signal transduction:JA	promote	1e-130
Zjn_sc00040.1.g00230.1.sm.mk	AT1G80350.1	down	148/306(48%)	Signal transduction:microtubule organization	promote	1e-78
Zjn_sc00088.1.g02550.1.sm.mk	AT4G23750.2	up	41/79(51%)	Transcription regulation:ERF	promote	2e-17
Zjn_sc00013.1.g03410.1.am.mk	AT5G41410.1	down	72/130(55%)	Transcription regulation:HB	promote	3e-38
Zjn_sc00067.1.g01250.1.sm.mkhc	AT5G41410.1	down	189/432(43%)	Transcription regulation:HB	promote	7e-86
Zjn_sc00102.1.g01250.1.am.mk	AT5G41410.1	down	145/375(38%)	Transcription regulation:HB	promote	2e-56
Zjn_sc00005.1.g04410.1.sm.mkhc	AT1G04250.1	down	100/197(50%)	Transcription regulation:IAA	promote	4e-42
Zjn_sc00024.1.g02230.1.am.mkhc	AT1G04250.1	down	58/122(47%)	Transcription regulation:IAA	promote	2e-25
Zjn_sc00107.1.g00840.1.sm.mkhc	AT1G04250.1	down	113/250(45%)	Transcription regulation:IAA	promote	5e-51
Zjn_sc00011.1.g02130.1.am.mk	AT5G60910.1	up	81/257(31%)	Transcription regulation:MADS	promote	2e-24
Zjn_sc00049.1.g01220.1.sm.mkhc	AT5G60910.1	up	85/157(54%)	Transcription regulation:MADS	promote	9e-43
Zjn_sc00224.1.g00020.1.am.mkhc	AT1G49010.1	down	159/303(52%)	Transcription regulation:MYB	promote	1e-73
Zjn_sc00001.1.g08470.1.sm.mk	AT3G29035.1	up	91/146(62%)	Transcription regulation:NAC	promote	3e-52
Zjn_sc00002.1.g02870.1.sm.mkhc	AT3G04060.1	up	144/331(43%)	Transcription regulation:NAC	promote	4e-55
Zjn_sc00012.1.g04390.1.am.mk	AT1G01720.1	up	89/166 (53%)	Transcription regulation:NAC	promote	1e-47
Zjn_sc00012.1.g05510.1.am.mk	AT4G35580.2	down	95/244(38%)	Transcription regulation:NAC	promote	2e-33
Zjn_sc00018.1.g05220.1.am.mk	AT4G23810.1	down	82/204(40%)	Transcription regulation:WRKY	promote	9e-29
Zjn_sc00029.1.g00730.1.am.mk	AT4G23810.1	down	91/244(37%)	Transcription regulation:WRKY	promote	3e-31
Zjn_sc00036.1.g00330.1.am.mk	AT4G23810.1	down	91/297(30%)	Transcription regulation:WRKY	promote	8e-29
Zjn_sc00039.1.g05410.1.sm.mk	AT4G23810.1	down	66/134(49%)	Transcription regulation:WRKY	promote	9e-30
Zjn_sc00069.1.g00340.1.sm.mkhc	AT1G62300.1	down	88/277(31%)	Transcription regulation:WRKY	promote	6e-31
Zjn_sc00004.1.g13510.1.am.mk	GRMZM2G087059_T02	up	109/274(39%)	"RNA.regulation of transcription.AP2/EREBP APETALA2/Ethylene-responsive element binding protein family "	unclear	4e-48
Zjn_sc00092.1.g01010.1.sm.mk	GRMZM2G087059_T02	up	199/281(70%)	"RNA.regulation of transcription.AP2/EREBP APETALA2/Ethylene-responsive element binding protein family "	unclear	1e-111
Zjn_sc00004.1.g11150.1.am.mk	GRMZM2G041462_T01	up	234/317(73%)	"RNA.regulation of transcription.HBHomeobox transcription factor family"	unclear	1e-136
Zjn_sc00002.1.g11770.1.am.mk	GSMUA_Achr4T16550_001	up	221/466(47%)	Amino acid metabolism	Unclear	1e-117
Zjn_sc00004.1.g04750.1.am.mk	GSMUA_Achr3T07240_001	down	48/71(67%)	Amino acid metabolism	Unclear	1e-21
Zjn_sc00004.1.g04760.1.am.mkhc	GSMUA_Achr3T07240_001	down	80/179(44%)	Amino acid metabolism	Unclear	3e-42
Zjn_sc00004.1.g06180.1.sm.mkhc	GSMUA_Achr2T10430_001	up	340/411(82%)	Amino acid metabolism	Unclear	0
Zjn_sc00011.1.g00150.1.sm.mkhc	GSMUA_Achr8T28000_001	up	271/332(81%)	Amino acid metabolism	Unclear	1e-153
Zjn_sc00015.1.g04200.1.am.mk	GSMUA_Achr6T35880_001	up	87/229(37%)	Amino acid metabolism	Unclear	1e-35
Zjn_sc00017.1.g03220.1.am.mk	GSMUA_Achr9T08500_001	down	278/444(62%)	Amino acid metabolism	Unclear	1e-144
Zjn_sc00019.1.g03710.1.sm.mkhc	GSMUA_Achr8T03080_001	up	127/297(42%)	Amino acid metabolism	Unclear	5e-54
Zjn_sc00020.1.g01020.1.am.mk	GSMUA_Achr9T08500_001	down	267/443(60%)	Amino acid metabolism	Unclear	1e-140
Zjn_sc00023.1.g04390.1.am.mkhc	GSMUA_Achr2T20550_001	down	60/154(38%)	Amino acid metabolism	Unclear	4e-22
Zjn_sc00027.1.g00220.1.sm.mkhc	GSMUA_Achr6T35880_001	up	129/261(49%)	Amino acid metabolism	Unclear	6e-67
Zjn_sc00029.1.g02370.1.am.mkhc	GSMUA_Achr8T28000_001	up	192/227(84%)	Amino acid metabolism	Unclear	1e-107
Zjn_sc00029.1.g03730.1.sm.mkhc	GSMUA_Achr3T07240_001	up	149/270(55%)	Amino acid metabolism	Unclear	2e-75
Zjn_sc00033.1.g00950.1.sm.mkhc	GSMUA_Achr11T09200_001	down	172/258(66%)	Amino acid metabolism	Unclear	2e-88
Zjn_sc00039.1.g02410.1.am.mk	GSMUA_Achr11T09200_001	down	195/480(40%)	Amino acid metabolism	Unclear	2e-89
Zjn_sc00043.1.g01460.1.am.mkhc	GSMUA_Achr2T20550_001	down	56/139(40%)	Amino acid metabolism	Unclear	1e-21
Zjn_sc00043.1.g04980.1.sm.mkhc	GSMUA_Achr7T10900_001	up	174/329(52%)	Amino acid metabolism	Unclear	2e-91
Zjn_sc00044.1.g02940.1.sm.mkhc	GSMUA_Achr5T18410_001	down	25/38(65%)	Amino acid metabolism	Unclear	2e-12
Zjn_sc00046.1.g00740.1.sm.mkhc	GSMUA_Achr8T15570_001	up	182/342(53%)	Amino acid metabolism	Unclear	1e-86
Zjn_sc00047.1.g03760.1.sm.mk	GSMUA_Achr11T03500_001	down	85/103(82%)	Amino acid metabolism	Unclear	3e-48
Zjn_sc00056.1.g03830.1.sm.mkhc	GSMUA_Achr2T10430_001	up	336/411(81%)	Amino acid metabolism	Unclear	0
Zjn_sc00065.1.g00500.1.sm.mkhc	GSMUA_Achr5T02740_001	up	604/670(90%)	Amino acid metabolism	Unclear	0
Zjn_sc00068.1.g01730.1.am.mk	GSMUA_Achr3T07240_001	up	227/312(72%)	Amino acid metabolism	Unclear	1e-126
Zjn_sc05363.1.g00010.1.am.mkhc	GSMUA_Achr3T07240_001	down	67/162(41%)	Amino acid metabolism	Unclear	1e-35
Zjn_sc00001.1.g12470.1.am.mk	GRMZM2G147268_T04	up	131/336(38%)	amino acid metabolism.degradation.serine-glycine-cysteine group.glycine	unclear	6e-61
Zjn_sc00004.1.g08100.1.sm.mkhc	GRMZM2G147268_T04	up	310/362(85%)	amino acid metabolism.degradation.serine-glycine-cysteine group.glycine	unclear	1e-180
Zjn_sc00049.1.g04500.1.sm.mk	GRMZM2G147268_T03	down	599/695(86%)	amino acid metabolism.degradation.serine-glycine-cysteine group.glycine	unclear	0
Zjn_sc00155.1.g00530.1.sm.mkhc	GRMZM2G312877_T01	up	215/258(83%)	Biodegradation of Xenobiotics.lactoylglutathione lyase	unclear	1e-120
Zjn_sc00001.1.g03180.1.sm.mkhc	GSMUA_Achr10T19040_001	up	192/361(53%)	Carbohydrate metabolism	Unclear	1e-96
Zjn_sc00001.1.g08150.1.am.mk	GSMUA_Achr9T11850_001	up	430/546(78%)	Carbohydrate metabolism	Unclear	0
Zjn_sc00001.1.g12360.1.sm.mkhc	GSMUA_Achr3T03290_001	down	135/376(35%)	Carbohydrate metabolism	Unclear	2e-58
Zjn_sc00002.1.g01410.1.am.mkhc	GSMUA_Achr4T17840_001	up	144/375(38%)	Carbohydrate metabolism	Unclear	2e-63
Zjn_sc00002.1.g11200.1.sm.mkhc	GSMUA_Achr1T12500_001	up	306/542(56%)	Carbohydrate metabolism	Unclear	0
Zjn_sc00003.1.g08960.1.sm.mkhc	GSMUA_Achr1T12500_001	up	293/538(54%)	Carbohydrate metabolism	Unclear	1e-172
Zjn_sc00003.1.g08990.1.sm.mk	GSMUA_Achr1T12500_001	up	307/549(55%)	Carbohydrate metabolism	Unclear	1e-178
Zjn_sc00009.1.g05680.1.cf.mkhc	GSMUA_Achr10T14380_001	up	32/61(52%)	Carbohydrate metabolism	Unclear	7e-16
Zjn_sc00012.1.g00720.1.am.mkhc	GSMUA_Achr1T11820_001	down	92/182(50%)	Carbohydrate metabolism	Unclear	4e-49
Zjn_sc00018.1.g01180.1.am.mk	GSMUA_AchrUn_randomT13630_001	up	314/472(66%)	Carbohydrate metabolism	Unclear	1e-170
Zjn_sc00022.1.g01450.1.am.mk	GSMUA_Achr3T03290_001	down	151/286(52%)	Carbohydrate metabolism	Unclear	5e-85
Zjn_sc00027.1.g00720.1.sm.mk	GSMUA_Achr1T11820_001	down	196/443(44%)	Carbohydrate metabolism	Unclear	2e-90
Zjn_sc00029.1.g05700.1.sm.mkhc	GSMUA_Achr10T14090_001	up	262/430(60%)	Carbohydrate metabolism	Unclear	1e-162
Zjn_sc00040.1.g04580.1.am.mkhc	GSMUA_Achr8T20870_001	up	224/337(66%)	Carbohydrate metabolism	Unclear	1e-129
Zjn_sc00044.1.g03980.1.sm.mkhc	GSMUA_Achr2T06930_001	down	60/124(48%)	Carbohydrate metabolism	Unclear	2e-23
Zjn_sc00050.1.g02970.1.sm.mkhc	GSMUA_Achr1T11820_001	down	68/105(64%)	Carbohydrate metabolism	Unclear	1e-35
Zjn_sc00067.1.g03620.1.am.mkhc	GSMUA_Achr3T03290_001	down	189/331(57%)	Carbohydrate metabolism	Unclear	1e-104
Zjn_sc00081.1.g00770.1.sm.mkhc	GSMUA_Achr1T11820_001	down	231/437(52%)	Carbohydrate metabolism	Unclear	1e-129
Zjn_sc00108.1.g00380.1.sm.mk	GSMUA_Achr3T03290_001	down	61/109(55%)	Carbohydrate metabolism	Unclear	1e-31
Zjn_sc00119.1.g00120.1.sm.mkhc	GSMUA_Achr1T11820_001	down	241/475(50%)	Carbohydrate metabolism	Unclear	1e-131
Zjn_sc00152.1.g00160.1.am.mk	GSMUA_Achr5T19880_001	down	368/551(66%)	Carbohydrate metabolism	Unclear	0
Zjn_sc00154.1.g00420.1.am.mkhc	GSMUA_Achr9T06140_001	down	130/213(61%)	Carbohydrate metabolism	Unclear	6e-69
Zjn_sc00155.1.g00360.1.sm.mk	GSMUA_Achr5T19880_001	down	363/551(65%)	Carbohydrate metabolism	Unclear	0
Zjn_sc00014.1.g09700.1.sm.mkhc	AT1G06820.1	down	28/62(45%)	carotenoid isomerase	unclear	2e-08
PB.11620	GSMUA_Achr11T12770_001	up	420/653(64%)	Cell and development	Unclear	0
Zjn_sc00002.1.g04390.1.sm.mkhc	GSMUA_Achr5T00080_001	down	179/387(46%)	Cell and development	Unclear	5e-81
Zjn_sc00004.1.g10780.1.am.mkhc	GSMUA_Achr1T06170_001	down	78/264(29%)	Cell and development	Unclear	2e-17
Zjn_sc00004.1.g13300.1.am.mk	GSMUA_Achr9T05770_001	up	72/190(37%)	Cell and development	Unclear	3e-31
Zjn_sc00007.1.g06580.1.sm.mkhc	GSMUA_Achr7T16910_001	up	323/510(63%)	Cell and development	Unclear	0
Zjn_sc00007.1.g06610.1.am.mk	GSMUA_Achr7T20430_001	up	156/266(58%)	Cell and development	Unclear	8e-79
Zjn_sc00013.1.g02450.1.am.mk	GSMUA_Achr5T10040_001	down	224/562(39%)	Cell and development	Unclear	1e-103
Zjn_sc00013.1.g04830.1.sm.mkhc	GSMUA_Achr9T05770_001	down	38/120(31%)	Cell and development	Unclear	5e-10
Zjn_sc00015.1.g03150.1.am.mk	GSMUA_Achr7T18620_001	up	207/369(56%)	Cell and development	Unclear	3e-98
Zjn_sc00025.1.g04870.1.sm.mkhc	GSMUA_Achr3T10000_001	up	126/330(38%)	Cell and development	Unclear	6e-44
Zjn_sc00027.1.g02200.1.sm.mkhc	GSMUA_Achr2T21630_001	up	250/541(46%)	Cell and development	Unclear	1e-114
Zjn_sc00031.1.g00650.1.sm.mk	GSMUA_Achr11T10400_001	down	125/276(45%)	Cell and development	Unclear	2e-56
Zjn_sc00035.1.g02410.1.am.mkhc	GSMUA_Achr5T10040_001	down	80/202(39%)	Cell and development	Unclear	7e-31
Zjn_sc00038.1.g01740.1.sm.mk	GSMUA_Achr5T00080_001	up	30/75(40%)	Cell and development	Unclear	6e-10
Zjn_sc00043.1.g05080.1.am.mk	GSMUA_Achr5T00080_001	up	84/150(56%)	Cell and development	Unclear	1e-35
Zjn_sc00044.1.g00540.1.sm.mkhc	GSMUA_Achr8T07370_001	down	144/436(33%)	Cell and development	Unclear	3e-55
Zjn_sc00045.1.g03610.1.am.mk	GSMUA_Achr9T05770_001	down	75/178(42%)	Cell and development	Unclear	4e-31
Zjn_sc00049.1.g00240.1.sm.mk	GSMUA_Achr3T09170_001	up	60/126(47%)	Cell and development	Unclear	3e-25
Zjn_sc00067.1.g02540.1.sm.mkhc	GSMUA_Achr7T06510_001	down	383/631(60%)	Cell and development	Unclear	0
Zjn_sc00067.1.g02840.1.sm.mk	GSMUA_Achr3T09170_001	up	63/93(67%)	Cell and development	Unclear	8e-32
Zjn_sc00067.1.g02850.1.sm.mkhc	GSMUA_Achr3T09170_001	up	63/93(67%)	Cell and development	Unclear	8e-32
Zjn_sc00078.1.g00910.1.sm.mkhc	GSMUA_Achr9T23030_001	up	232/512(45%)	Cell and development	Unclear	1e-108
Zjn_sc00078.1.g01460.1.am.mkhc	GSMUA_Achr5T10040_001	up	80/185(43%)	Cell and development	Unclear	9e-38
Zjn_sc00096.1.g00960.1.sm.mkhc	GSMUA_Achr1T06170_001	down	31/72(43%)	Cell and development	Unclear	7e-07
Zjn_sc00146.1.g00490.1.sm.mk	GSMUA_Achr5T10040_001	down	206/582(35%)	Cell and development	Unclear	1e-87
Zjn_sc00167.1.g00300.1.sm.mk	GSMUA_Achr11T10400_001	down	126/280(45%)	Cell and development	Unclear	5e-59
Zjn_sc00271.1.g00010.1.am.mkhc	GSMUA_Achr9T25310_001	up	83/222(37%)	Cell and development	Unclear	1e-27
Zjn_sc00003.1.g03330.1.am.mk	GSMUA_Achr1T24760_001	down	340/446(76%)	Cell wall metabolism	Unclear	0
Zjn_sc00005.1.g02610.1.am.mk	GSMUA_Achr9T16670_001	up	283/474(59%)	Cell wall metabolism	Unclear	1e-163
Zjn_sc00007.1.g11880.1.am.mk	GSMUA_Achr5T18560_001	up	505/713(70%)	Cell wall metabolism	Unclear	0
Zjn_sc00007.1.g11910.1.sm.mkhc	GSMUA_Achr5T18560_001	up	474/699(67%)	Cell wall metabolism	Unclear	0
Zjn_sc00009.1.g08130.1.am.mk	GSMUA_Achr5T07480_001	up	195/252(77%)	Cell wall metabolism	Unclear	1e-120
Zjn_sc00014.1.g03380.1.sm.mkhc	GSMUA_Achr6T08120_001	up	97/163(59%)	Cell wall metabolism	Unclear	6e-57
Zjn_sc00015.1.g05800.1.sm.mkhc	GSMUA_Achr6T36390_001	down	136/245(55%)	Cell wall metabolism	Unclear	7e-67
Zjn_sc00017.1.g00060.1.sm.mkhc	GSMUA_Achr5T18560_001	up	474/699(67%)	Cell wall metabolism	Unclear	0
Zjn_sc00018.1.g02180.1.am.mk	GSMUA_Achr3T10990_001	up	149/267(55%)	Cell wall metabolism	Unclear	6e-74
Zjn_sc00018.1.g02920.1.am.mk	GSMUA_AchrUn_randomT20960_001	down	101/187(54%)	Cell wall metabolism	Unclear	6e-44
Zjn_sc00022.1.g04550.1.sm.mkhc	GSMUA_Achr5T03540_001	down	203/319(63%)	Cell wall metabolism	Unclear	1e-116
Zjn_sc00023.1.g02960.1.am.mk	GSMUA_Achr2T02550_001	up	234/407(57%)	Cell wall metabolism	Unclear	1e-119
Zjn_sc00026.1.g00550.1.sm.mk	GSMUA_Achr7T01790_001	down	62/134(46%)	Cell wall metabolism	Unclear	1e-27
Zjn_sc00040.1.g03560.1.am.mk	GSMUA_Achr7T18320_001	up	393/507(77%)	Cell wall metabolism	Unclear	0
Zjn_sc00045.1.g04720.1.sm.mk	GSMUA_Achr3T13670_001	up	170/362(46%)	Cell wall metabolism	Unclear	5e-93
Zjn_sc00056.1.g01810.1.am.mk	GSMUA_Achr3T30830_001	up	29/50(58%)	Cell wall metabolism	Unclear	1e-09
Zjn_sc00078.1.g00630.1.am.mk	GSMUA_Achr6T36390_001	down	80/107(74%)	Cell wall metabolism	Unclear	3e-46
Zjn_sc00103.1.g00580.1.am.mk	GSMUA_Achr5T18560_001	up	454/657(69%)	Cell wall metabolism	Unclear	0
Zjn_sc00005.1.g08680.1.sm.mkhc	GRMZM2G042179_T01	up	184/285(64%)	cell wall.precursor synthesis.GAE	unclear	3e-93
Zjn_sc00043.1.g01520.1.sm.mkhc	GRMZM2G042179_T01	up	176/285(61%)	cell wall.precursor synthesis.GAE	unclear	2e-91
PB.3612	GRMZM2G054715_T02	up	216/311(69%)	cell.organisation	unclear	1e-119
PB.9045	GRMZM2G054715_T02	up	251/333(75%)	cell.organisation	unclear	1e-140
Zjn_sc00004.1.g09050.1.am.mkhc	GRMZM2G054715_T06	up	213/311(68%)	cell.organisation	unclear	1e-119
Zjn_sc00014.1.g02190.1.am.mkhc	GRMZM2G054715_T03	down	148/211(70%)	cell.organisation	unclear	3e-82
Zjn_sc00022.1.g01920.1.sm.mkhc	GRMZM2G054715_T03	up	822/969(84%)	cell.organisation	unclear	0
Zjn_sc00022.1.g04280.1.am.mk	GRMZM2G054715_T06	down	232/282(82%)	cell.organisation	unclear	1e-134
Zjn_sc00049.1.g01650.1.am.mkhc	GRMZM2G054715_T07	up	648/864(75%)	cell.organisation	unclear	0
Zjn_sc00030.1.g02630.1.sm.mk	AT3G22840.1	down	69/109(63%)	Chlorophyll degradation	unclear	7e-36
Zjn_sc00030.1.g02690.1.am.mk	AT3G22840.1	down	69/109(63%)	Chlorophyll degradation	unclear	7e-36
Zjn_sc00051.1.g01160.1.am.mk	AT3G22840.1	down	89/176(50%)	Chlorophyll degradation	unclear	1e-39
Zjn_sc00051.1.g01170.1.am.mk	AT3G22840.1	down	58/116(50%)	Chlorophyll degradation	unclear	4e-25
Zjn_sc02935.1.g00010.1.am.mk	AT3G22840.1	down	19/32(59%)	Chlorophyll degradation	unclear	1e-06
Zjn_sc00006.1.g01500.1.am.mk	GRMZM2G349749_T01	up	218/366(59%)	development.storage proteins	unclear	1e-107
Zjn_sc00017.1.g02340.1.sm.mkhc	GRMZM2G349749_T01	up	206/378(54%)	development.storage proteins	unclear	1e-93
Zjn_sc00056.1.g03700.1.sm.mk	GRMZM2G168365_T03	up	83/147(56%)	development.unspecified	unclear	1e-34
Zjn_sc00027.1.g00830.1.am.mk	GRMZM2G168744_T03	up	265/376(70%)	DNA.synthesis/chromatin structure	unclear	1e-143
Zjn_sc00001.1.g05940.1.sm.mkhc	GSMUA_Achr10T31440_001	down	37/95(38%)	Energy metabolism	Unclear	3e-08
Zjn_sc00002.1.g11050.1.am.mk	GSMUA_Achr3T30070_001	down	202/571(35%)	Energy metabolism	Unclear	1e-62
Zjn_sc00002.1.g11100.1.sm.mkhc	GSMUA_Achr3T30070_001	up	697/958(72%)	Energy metabolism	Unclear	0
Zjn_sc00003.1.g03630.1.am.mkhc	GSMUA_Achr5T28130_001	down	324/682(47%)	Energy metabolism	Unclear	1e-136
Zjn_sc00003.1.g08870.1.am.mkhc	GSMUA_Achr3T30070_001	up	442/647(68%)	Energy metabolism	Unclear	0
Zjn_sc00004.1.g06960.1.sm.mkhc	GSMUA_Achr5T12290_001	up	420/603(69%)	Energy metabolism	Unclear	0
Zjn_sc00004.1.g06970.1.sm.mk	GSMUA_Achr5T12290_001	up	262/359(72%)	Energy metabolism	Unclear	1e-145
Zjn_sc00005.1.g05900.1.am.mkhc	GSMUA_Achr8T29470_001	up	181/380(47%)	Energy metabolism	Unclear	1e-100
Zjn_sc00006.1.g05080.1.sm.mkhc	GSMUA_Achr11T19550_001	up	231/432(53%)	Energy metabolism	Unclear	1e-121
Zjn_sc00007.1.g03840.1.sm.mkhc	GSMUA_Achr10T31440_001	down	33/90(36%)	Energy metabolism	Unclear	8e-08
Zjn_sc00008.1.g05540.1.am.mk	GSMUA_Achr10T31440_001	down	79/95(83%)	Energy metabolism	Unclear	2e-43
Zjn_sc00008.1.g07820.1.sm.mkhc	GSMUA_Achr6T26850_001	down	735/955(76%)	Energy metabolism	Unclear	0
Zjn_sc00008.1.g10020.1.sm.mkhc	GSMUA_Achr10T31440_001	down	37/95(38%)	Energy metabolism	Unclear	3e-08
Zjn_sc00009.1.g09880.1.sm.mk	GSMUA_Achr4T33660_001	up	138/231(59%)	Energy metabolism	Unclear	5e-72
Zjn_sc00011.1.g02740.1.sm.mkhc	GSMUA_Achr4T01040_001	up	363/511(71%)	Energy metabolism	Unclear	0
Zjn_sc00011.1.g07150.1.sm.mkhc	GSMUA_Achr2T16600_001	up	220/266(82%)	Energy metabolism	Unclear	1e-128
Zjn_sc00018.1.g00280.1.sm.mkhc	GSMUA_Achr6T26850_001	down	174/217(80%)	Energy metabolism	Unclear	1e-102
Zjn_sc00018.1.g04620.1.sm.mkhc	GSMUA_Achr10T31440_001	down	31/73(42%)	Energy metabolism	Unclear	1e-09
Zjn_sc00024.1.g01550.1.sm.mkhc	GSMUA_Achr5T28130_001	down	364/555(65%)	Energy metabolism	Unclear	0
Zjn_sc00029.1.g05270.1.sm.mkhc	GSMUA_Achr4T01040_001	up	307/488(62%)	Energy metabolism	Unclear	1e-168
Zjn_sc00040.1.g04530.1.sm.mkhc	GSMUA_Achr2T16100_001	up	531/853(62%)	Energy metabolism	Unclear	0
Zjn_sc00069.1.g01820.1.am.mk	GSMUA_Achr10T31440_001	down	80/95(84%)	Energy metabolism	Unclear	8e-44
Zjn_sc00075.1.g00990.1.am.mk	GSMUA_AchrUn_randomT14000_001	down	32/57(56%)	Energy metabolism	Unclear	4e-13
Zjn_sc00090.1.g00600.1.sm.mk	GSMUA_Achr11T19550_001	up	108/198(54%)	Energy metabolism	Unclear	6e-55
Zjn_sc00090.1.g00610.1.sm.mkhc	GSMUA_Achr11T19550_001	up	53/91(58%)	Energy metabolism	Unclear	2e-27
Zjn_sc00143.1.g00930.1.sm.mkhc	GSMUA_Achr3T04430_001	up	215/238(90%)	Energy metabolism	Unclear	1e-124
Zjn_sc00180.1.g00130.1.am.mkhc	GSMUA_Achr8T29470_001	down	287/376(76%)	Energy metabolism	Unclear	1e-169
Zjn_sc00200.1.g00110.1.am.mkhc	GSMUA_Achr9T20740_001	up	512/644(79%)	Energy metabolism	Unclear	0
Zjn_sc00026.1.g01640.1.sm.mk	AT1G06040.1	down	73/174(41%)	Environmental factors (Salt)	unclear	7e-30
Zjn_sc00056.1.g01120.1.am.mk	AT1G06040.1	down	132/261(50%)	Environmental factors (Salt)	unclear	7e-59
Zjn_sc00038.1.g01980.1.sm.mkhc	AT1G02750.1	down	39/117(33%)	Environmental factors (water deprivation)	unclear	7e-14
Zjn_sc00022.1.g06100.1.sm.mkhc	AT1G20440.1	down	96/284(33%)	Environmental factors(Cold)	unclear	4e-25
Zjn_sc00008.1.g00870.1.am.mk	AT2G43200.1	up	116/256(45%)	Environmental factors:dehydration	unclear	3e-60
Zjn_sc00022.1.g00750.1.am.mkhc	AT2G43200.1	up	181/504(35%)	Environmental factors:dehydration	unclear	5e-74
Zjn_sc00034.1.g04290.1.sm.mk	AT2G43200.1	down	95/263(36%)	Environmental factors:dehydration	unclear	9e-38
Zjn_sc00034.1.g04990.1.sm.mkhc	AT2G43200.1	up	203/526(38%)	Environmental factors:dehydration	unclear	1e-101
Zjn_sc00040.1.g05070.1.sm.mkhc	AT2G43200.1	down	67/128(52%)	Environmental factors:dehydration	unclear	3e-30
Zjn_sc00103.1.g01000.1.am.mk	AT4G24220.1	up	233/396(58%)	Environmental factors:PCD	Unclear	1e-138
Zjn_sc00037.1.g05820.1.am.mk	AT4G16740.2	down	57/220(25%)	Environmental factors:Wounding	Unclear	2e-09
Zjn_sc00152.1.g00760.1.sm.mk	AT4G16740.2	up	52/194(26%)	Environmental factors:Wounding	Unclear	3e-12
Zjn_sc00007.1.g00790.1.sm.mkhc	GSMUA_AchrUn_randomT10820_001	down	347/471(73%)	Hormone metabolism	Unclear	0
Zjn_sc00009.1.g11450.1.sm.mkhc	GSMUA_Achr4T15110_001	down	207/331(62%)	Hormone metabolism	Unclear	1e-118
Zjn_sc00014.1.g05600.1.sm.mk	GSMUA_Achr8T04830_001	up	225/466(48%)	Hormone metabolism	Unclear	1e-124
Zjn_sc00020.1.g00810.1.sm.mkhc	GSMUA_Achr2T20800_001	up	164/234(70%)	Hormone metabolism	Unclear	1e-100
Zjn_sc00039.1.g01520.1.am.mkhc	GSMUA_Achr1T18250_001	down	213/310(68%)	Hormone metabolism	Unclear	1e-125
Zjn_sc00049.1.g03880.1.sm.mkhc	GSMUA_Achr2T20800_001	up	280/361(77%)	Hormone metabolism	Unclear	1e-165
Zjn_sc00051.1.g01820.1.am.mk	GSMUA_Achr2T12820_001	down	149/278(53%)	Hormone metabolism	Unclear	1e-73
Zjn_sc00053.1.g01370.1.sm.mkhc	GSMUA_AchrUn_randomT10820_001	down	33/80(41%)	Hormone metabolism	Unclear	6e-16
Zjn_sc00155.1.g00440.1.am.mk	GSMUA_Achr6T13520_001	down	260/487(53%)	Hormone metabolism	Unclear	1e-147
Zjn_sc00043.1.g04410.1.am.mk	GRMZM2G109130_T01	up	26/29(89%)	hormone metabolism.jasmonate.synthesis-degradation.lipoxygenase	unclear	1e-08
Zjn_sc00014.1.g08520.1.sm.mkhc	AT4G33090.1	down	82/314(26%)	Hormone response pathway	unclear	2e-15
Zjn_sc00015.1.g00260.1.sm.mkhc	AT4G33090.1	down	496/875(56%)	Hormone response pathway	unclear	0
Zjn_sc00017.1.g00950.1.sm.mk	AT5G01990.1	up	164/424(38%)	Hormone response pathway	unclear	3e-84
Zjn_sc00028.1.g00250.1.am.mk	AT3G59900.1	up	32/57(56%)	Hormone response pathway	unclear	5e-11
Zjn_sc00028.1.g02710.1.sm.mkhc	AT5G19140.1	down	127/181(70%)	Hormone response pathway	unclear	5e-70
Zjn_sc00051.1.g00540.1.sm.mkhc	AT3G46060.2	up	109/180(60%)	Hormone response pathway	unclear	5e-53
Zjn_sc00006.1.g07210.1.sm.mk	AT2G46510.1	down	39/79(49%)	Hormone response pathway:ABA	unclear	2e-14
Zjn_sc00007.1.g00060.1.sm.mkhc	AT3G56850.1	down	44/125(35%)	Hormone response pathway:ABA	unclear	1e-08
Zjn_sc00018.1.g03670.1.sm.mkhc	AT1G49720.1	down	143/379 (37%)	Hormone response pathway:ABA	Unclear	2e-50
Zjn_sc00027.1.g05950.1.sm.mkhc	AT2G41540.3	up	362/462(78%)	Hormone response pathway:ABA	unclear	0
Zjn_sc00029.1.g03690.1.sm.mk	AT2G46510.1	down	196/555(35%)	Hormone response pathway:ABA	unclear	4e-78
Zjn_sc00040.1.g02620.1.sm.mkhc	AT2G41540.3	up	365/461(79%)	Hormone response pathway:ABA	unclear	0
Zjn_sc00044.1.g01150.1.am.mkhc	AT1G69260.1	down	121/329(36%)	Hormone response pathway:ABA	unclear	1e-39
Zjn_sc00044.1.g05080.1.sm.mk	AT3G56850.1	down	133/302(44%)	Hormone response pathway:ABA	unclear	1e-43
Zjn_sc00050.1.g00470.1.am.mk	AT3G56850.1	down	60/158(37%)	Hormone response pathway:ABA	unclear	3e-15
Zjn_sc00061.1.g01140.1.sm.mk	AT5G66400.1	down	88/172(51%)	Hormone response pathway:ABA	unclear	1e-32
Zjn_sc00088.1.g01080.1.sm.mk	U95953.2	down	464/598(77%)	Hormone response pathway:ABA	unclear	0
Zjn_sc00105.1.g00930.1.am.mk	U95953.2	down	453/549(82%)	Hormone response pathway:ABA	unclear	0
Zjn_sc00064.1.g00260.1.es.mkhc	AT2G46510.1	up	94/226 (41%)	Hormone response pathway:ABA	unclear	4e-38
Zjn_sc00004.1.g04660.1.am.mk	AT2G28350.1	down	210/498(42%)	Hormone response pathway:Auxin	unclear	9e-87
Zjn_sc00004.1.g05650.1.am.mk	AT3G60690.1	down	71/164(43%)	Hormone response pathway:Auxin	unclear	5e-26
Zjn_sc00009.1.g10880.1.am.mk	AT4G37390.1	up	422/603(69%)	Hormone response pathway:Auxin	unclear	0
Zjn_sc00011.1.g03140.1.am.mk	AY557341.1	up	382/520(73%)	Hormone response pathway:Auxin	unclear	0
Zjn_sc00013.1.g06690.1.sm.mkhc	AT5G20960.2	up	665/1229(54%)	Hormone response pathway:Auxin	unclear	0
Zjn_sc00022.1.g00480.1.am.mkhc	AT1G12820.1	up	122/295(41%)	Hormone response pathway:Auxin	unclear	7e-60
Zjn_sc00029.1.g05650.1.am.mk	AY557341.1	down	377/541(69%)	Hormone response pathway:Auxin	unclear	0
Zjn_sc00040.1.g00880.1.am.mk	AT4G37390.1	up	415/629(65%)	Hormone response pathway:Auxin	unclear	0
Zjn_sc00045.1.g03390.1.sm.mk	AT1G16510.1	down	52/117(44%)	Hormone response pathway:Auxin	unclear	4e-17
Zjn_sc00047.1.g02740.1.am.mk	AT2G26170.2	down	238/463(51%)	Hormone response pathway:Auxin	unclear	1e-130
Zjn_sc00056.1.g01260.1.am.mk	LOC_Os08g41280.1	down	97/306(31%)	Hormone response pathway:Auxin	unclear	9e-32
Zjn_sc00071.1.g00390.1.sm.mk	AT1G51950.1	down	64/150(42%)	Hormone response pathway:Auxin	unclear	3e-22
Zjn_sc00077.1.g00490.1.am.mkhc	AT5G20960.2	down	106/163(65%)	Hormone response pathway:Auxin	unclear	1e-60
Zjn_sc00092.1.g02060.1.sm.mk	AT2G46690.1	up	56/123(45%)	Hormone response pathway:Auxin	unclear	1e-23
Zjn_sc00200.1.g00340.1.am.mk	AT2G21210.1	down	36/67(53%)	Hormone response pathway:Auxin	unclear	8e-13
Zjn_sc00005.1.g03820.1.am.mk	AT1G75450.1	up	250/568(44%)	Hormone response pathway:CK	Unclear	1e-120
Zjn_sc00009.1.g01300.1.sm.mkhc	AT1G75450.1	up	171/324(52%)	Hormone response pathway:CK	Unclear	6e-89
Zjn_sc00034.1.g01490.1.am.mkhc	AT1G75450.1	up	275/522(52%)	Hormone response pathway:CK	Unclear	1e-151
Zjn_sc00040.1.g01480.1.sm.mkhc	AT1G75450.1	up	272/387(70%)	Hormone response pathway:CK	Unclear	1e-153
Zjn_sc00106.1.g01680.1.am.mk	AT1G75450.1	down	109/214(50%)	Hormone response pathway:CK	Unclear	2e-49
Zjn_sc00003.1.g12210.1.sm.mk	AT4G17500.1	down	55/95(57%)	Hormone response pathway:ET	unclear	3e-24
Zjn_sc00004.1.g12950.1.sm.mk	AT3G20310.1	down	112/227(49%)	Hormone response pathway:ET	unclear	7e-40
Zjn_sc00005.1.g01940.1.am.mkhc	AT1G09740.1	up	52/138(37%)	Hormone response pathway:ET	unclear	1e-15
Zjn_sc00005.1.g02060.1.sm.mkhc	AT3G16770.1	up	94/249(37%)	Hormone response pathway:ET	unclear	3e-33
Zjn_sc00021.1.g02000.1.sm.mkhc	AT1G62380.1	up	129/305(42%)	Hormone response pathway:ET	unclear	6e-68
Zjn_sc00023.1.g06010.1.sm.mk	AT1G50640.1	down	98/188(52%)	Hormone response pathway:ET	unclear	1e-40
Zjn_sc00033.1.g00990.1.am.mkhc	LOC_Os02g54160.1	up	108/251(43%)	Hormone response pathway:ET	Unclear	2e-36
Zjn_sc00037.1.g01930.1.am.mkhc	AT1G09740.1	up	66/160(41%)	Hormone response pathway:ET	unclear	1e-26
Zjn_sc00039.1.g02370.1.am.mkhc	LOC_Os02g54160.1	up	164/404(40%)	Hormone response pathway:ET	Unclear	3e-64
Zjn_sc00068.1.g00480.1.am.mkhc	AT5G44790.1	up	576/835(68%)	Hormone response pathway:ET	unclear	0
Zjn_sc00115.1.g00930.1.am.mk	AT3G16770.1	up	79/176(44%)	Hormone response pathway:ET	unclear	1e-30
Zjn_sc00142.1.g00550.1.am.mk	AT1G50640.1	down	59/180(32%)	Hormone response pathway:ET	unclear	7e-18
Zjn_sc00003.1.g10610.1.sm.mkhc	AT1G19180.1	up	74/233(31%)	Hormone response pathway:JA	unclear	2e-18
Zjn_sc00032.1.g00010.1.am.mkhc	AT1G19180.1	up	77/232(33%)	Hormone response pathway:JA	unclear	4e-21
Zjn_sc00046.1.g01300.1.am.mkhc	AT1G13280.1	up	119/179(66%)	Hormone response pathway:JA	unclear	3e-67
Zjn_sc00106.1.g01710.1.sm.mkhc	AT2G06050.1	up	198/275(72%)	Hormone response pathway:JA	unclear	1e-111
Zjn_sc00047.1.g01150.1.sm.mkhc	AT1G32950.1	down	30/54(55%)	Hormone response pathway:SA	unclear	4e-11
Zjn_sc00001.1.g01200.1.sm.mk	GSMUA_Achr9T07300_001	up	78/251(31%)	Lipid and secondary metabolism	Unclear	2e-21
Zjn_sc00001.1.g10050.1.am.mk	GSMUA_Achr7T14040_001	down	169/346(48%)	Lipid and secondary metabolism	Unclear	4e-88
Zjn_sc00002.1.g11120.1.sm.mkhc	GSMUA_Achr8T15380_001	up	55/280(19%)	Lipid and secondary metabolism	Unclear	8e-09
Zjn_sc00003.1.g06950.1.am.mk	GSMUA_Achr9T12980_001	down	168/358(46%)	Lipid and secondary metabolism	Unclear	8e-86
Zjn_sc00003.1.g14160.1.sm.mk	GSMUA_Achr8T12220_001	up	63/67(94%)	Lipid and secondary metabolism	Unclear	1e-37
Zjn_sc00004.1.g07930.1.am.mk	GSMUA_Achr8T12220_001	down	188/231(81%)	Lipid and secondary metabolism	Unclear	1e-110
Zjn_sc00004.1.g11600.1.am.mk	GSMUA_Achr7T16780_001	down	102/329(31%)	Lipid and secondary metabolism	Unclear	3e-30
Zjn_sc00005.1.g04340.1.am.mk	GSMUA_Achr2T16940_001	down	187/431(43%)	Lipid and secondary metabolism	Unclear	8e-98
Zjn_sc00005.1.g08940.1.sm.mkhc	GSMUA_Achr5T21240_001	up	331/690(47%)	Lipid and secondary metabolism	Unclear	1e-163
Zjn_sc00007.1.g02980.1.sm.mkhc	GSMUA_Achr3T07980_001	up	161/338(47%)	Lipid and secondary metabolism	Unclear	3e-71
Zjn_sc00007.1.g06720.1.am.mkhc	GSMUA_Achr6T22300_001	up	104/148(70%)	Lipid and secondary metabolism	Unclear	5e-56
Zjn_sc00007.1.g10850.1.am.mk	GSMUA_Achr8T11740_001	down	284/472(60%)	Lipid and secondary metabolism	Unclear	1e-168
Zjn_sc00008.1.g04410.1.am.mk	GSMUA_Achr11T26460_001	down	106/265(40%)	Lipid and secondary metabolism	Unclear	7e-45
Zjn_sc00009.1.g04550.1.am.mkhc	GSMUA_Achr8T32640_001	up	236/335(70%)	Lipid and secondary metabolism	Unclear	1e-129
Zjn_sc00009.1.g07360.1.sm.mkhc	GSMUA_Achr6T34380_001	up	140/295(47%)	Lipid and secondary metabolism	Unclear	3e-74
Zjn_sc00011.1.g02640.1.sm.mk	GSMUA_Achr1T25050_001	up	158/453(34%)	Lipid and secondary metabolism	Unclear	2e-47
Zjn_sc00011.1.g04490.1.am.mk	GSMUA_Achr6T15280_001	up	292/478(61%)	Lipid and secondary metabolism	Unclear	1e-166
Zjn_sc00016.1.g03230.1.am.mk	GSMUA_Achr1T20250_001	up	183/422(43%)	Lipid and secondary metabolism	Unclear	1e-87
Zjn_sc00017.1.g00760.1.sm.mkhc	GSMUA_Achr5T04550_001	up	313/454(68%)	Lipid and secondary metabolism	Unclear	1e-171
Zjn_sc00018.1.g00530.1.am.mkhc	GSMUA_Achr7T14040_001	down	188/342(54%)	Lipid and secondary metabolism	Unclear	1e-110
Zjn_sc00019.1.g02930.1.am.mk	GSMUA_Achr5T18500_001	down	150/420(35%)	Lipid and secondary metabolism	Unclear	1e-48
Zjn_sc00022.1.g03110.1.am.mkhc	GSMUA_Achr6T22300_001	up	154/254(60%)	Lipid and secondary metabolism	Unclear	1e-80
Zjn_sc00022.1.g07170.1.am.mk	GSMUA_Achr8T11740_001	down	287/487(58%)	Lipid and secondary metabolism	Unclear	1e-167
Zjn_sc00023.1.g00950.1.am.mk	GSMUA_Achr8T12220_001	down	186/253(73%)	Lipid and secondary metabolism	Unclear	1e-107
Zjn_sc00026.1.g01110.1.am.mkhc	GSMUA_Achr7T14040_001	up	153/347(44%)	Lipid and secondary metabolism	Unclear	5e-76
Zjn_sc00027.1.g06060.1.sm.mkhc	GSMUA_Achr8T24010_001	up	353/512(68%)	Lipid and secondary metabolism	Unclear	0
Zjn_sc00028.1.g01050.1.am.mk	GSMUA_Achr4T16570_001	down	132/375(35%)	Lipid and secondary metabolism	Unclear	1e-53
Zjn_sc00028.1.g01170.1.am.mk	GSMUA_Achr8T11740_001	up	218/495(44%)	Lipid and secondary metabolism	Unclear	1e-111
Zjn_sc00029.1.g04240.1.sm.mkhc	GSMUA_Achr7T08820_001	up	235/375(62%)	Lipid and secondary metabolism	Unclear	1e-134
Zjn_sc00031.1.g00140.1.sm.mk	GSMUA_Achr5T14190_001	up	167/222(75%)	Lipid and secondary metabolism	Unclear	1e-102
Zjn_sc00032.1.g00390.1.sm.mk	GSMUA_Achr5T04550_001	up	131/447(29%)	Lipid and secondary metabolism	Unclear	1e-44
Zjn_sc00032.1.g00420.1.am.mkhc	GSMUA_Achr5T04550_001	up	125/441(28%)	Lipid and secondary metabolism	Unclear	7e-45
Zjn_sc00034.1.g01910.1.sm.mk	GSMUA_Achr11T11790_001	down	110/245(44%)	Lipid and secondary metabolism	Unclear	7e-55
Zjn_sc00040.1.g02680.1.sm.mk	GSMUA_Achr8T24010_001	down	346/502(68%)	Lipid and secondary metabolism	Unclear	0
Zjn_sc00048.1.g00980.1.am.mkhc	GSMUA_AchrUn_randomT23850_001	down	39/115(33%)	Lipid and secondary metabolism	Unclear	4e-11
Zjn_sc00050.1.g00130.1.sm.mk	GSMUA_Achr5T04550_001	up	125/451(27%)	Lipid and secondary metabolism	Unclear	2e-37
Zjn_sc00058.1.g01040.1.sm.mkhc	GSMUA_Achr3T11750_001	down	69/193(35%)	Lipid and secondary metabolism	Unclear	2e-21
Zjn_sc00065.1.g01500.1.sm.mk	GSMUA_Achr5T18500_001	down	161/427(37%)	Lipid and secondary metabolism	Unclear	3e-60
Zjn_sc00067.1.g03230.1.sm.mk	GSMUA_Achr5T04550_001	up	129/440(29%)	Lipid and secondary metabolism	Unclear	2e-22
Zjn_sc00069.1.g02490.1.am.mk	GSMUA_Achr1T20250_001	up	196/411(47%)	Lipid and secondary metabolism	Unclear	1e-104
Zjn_sc00082.1.g00260.1.sm.mk	GSMUA_Achr4T16570_001	down	144/352(40%)	Lipid and secondary metabolism	Unclear	9e-74
Zjn_sc00086.1.g01000.1.sm.mk	GSMUA_Achr5T04550_001	down	151/442(34%)	Lipid and secondary metabolism	Unclear	2e-51
Zjn_sc00106.1.g01920.1.sm.mkhc	GSMUA_Achr4T16570_001	down	63/148(42%)	Lipid and secondary metabolism	Unclear	2e-29
Zjn_sc00122.1.g00600.1.sm.mkhc	GSMUA_Achr8T15380_001	down	39/103(37%)	Lipid and secondary metabolism	Unclear	1e-14
Zjn_sc00132.1.g00660.1.sm.mkhc	GSMUA_Achr5T14190_001	down	19/42(45%)	Lipid and secondary metabolism	Unclear	3e-07
Zjn_sc00135.1.g00790.1.sm.mk	GSMUA_Achr4T16570_001	down	98/254(38%)	Lipid and secondary metabolism	Unclear	4e-45
Zjn_sc00143.1.g00940.1.sm.mk	GSMUA_Achr9T12980_001	up	254/438(57%)	Lipid and secondary metabolism	Unclear	1e-139
Zjn_sc00171.1.g00030.1.sm.mkhc	GSMUA_Achr4T16570_001	down	125/297(42%)	Lipid and secondary metabolism	Unclear	2e-59
Zjn_sc04545.1.g00010.1.am.mk	GSMUA_Achr5T14190_001	up	108/168(64%)	Lipid and secondary metabolism	Unclear	4e-64
PB.12495	AT1G64760.1	down	37/80(46%)	Lipid/Carbohydrate metabolism	unclear	1e-15
PB.1328	AT5G43760.1	down	301/493(61%)	Lipid/Carbohydrate metabolism	unclear	1e-168
PB.13338	AT5G43760.1	down	344/493(69%)	Lipid/Carbohydrate metabolism	unclear	0
PB.13942	AT5G43760.1	down	241/490(49%)	Lipid/Carbohydrate metabolism	unclear	1e-129
PB.15935	AT4G29360.1	up	183/469(39%)	Lipid/Carbohydrate metabolism	unclear	3e-89
PB.2528	AT4G29360.1	down	136/322(42%)	Lipid/Carbohydrate metabolism	unclear	3e-74
Zjn_sc00001.1.g01550.1.sm.mkhc	AT2G40840.1	down	197/360(54%)	Lipid/Carbohydrate metabolism	unclear	1e-106
Zjn_sc00001.1.g02370.1.am.mk	AT1G28570.1	down	162/371(43%)	Lipid/Carbohydrate metabolism	unclear	4e-88
Zjn_sc00002.1.g15410.1.sm.mk	AT1G20560.1	down	328/564(58%)	Lipid/Carbohydrate metabolism	unclear	0
Zjn_sc00002.1.g16910.1.sm.mkhc	AT1G08310.2	up	108/255(42%)	Lipid/Carbohydrate metabolism	unclear	5e-56
Zjn_sc00003.1.g03940.1.sm.mkhc	AT1G08310.1	up	57/134(42%)	Lipid/Carbohydrate metabolism	unclear	4e-25
Zjn_sc00004.1.g07170.1.am.mk	AT1G33811.1	up	113/354(31%)	Lipid/Carbohydrate metabolism	unclear	1e-40
Zjn_sc00004.1.g11330.1.sm.mkhc	AT5G64570.1	up	373/540(69%)	Lipid/Carbohydrate metabolism	unclear	0
Zjn_sc00004.1.g11930.1.am.mk	AT1G73880.1	up	125/307(40%)	Lipid/Carbohydrate metabolism	unclear	1e-57
Zjn_sc00004.1.g12320.1.sm.mkhc	AT4G25900.1	down	55/124(44%)	Lipid/Carbohydrate metabolism	unclear	1e-26
Zjn_sc00006.1.g03160.1.sm.mk	AT4G34860.2	down	418/576(72%)	Lipid/Carbohydrate metabolism	unclear	0
Zjn_sc00006.1.g03940.1.am.mk	AT1G08310.1	down	135/316(42%)	Lipid/Carbohydrate metabolism	unclear	6e-65
Zjn_sc00007.1.g05270.1.sm.mk	AT1G33811.1	up	117/378(30%)	Lipid/Carbohydrate metabolism	unclear	2e-44
Zjn_sc00008.1.g01590.1.sm.mkhc	AT4G30270.1	down	169/274(61%)	Lipid/Carbohydrate metabolism	Unclear	1e-103
Zjn_sc00008.1.g01800.1.sm.mk	AT1G28590.1	down	54/112(48%)	Lipid/Carbohydrate metabolism	unclear	3e-20
Zjn_sc00010.1.g01430.1.sm.mk	AT5G13110.1	down	284/379(74%)	Lipid/Carbohydrate metabolism	unclear	1e-162
Zjn_sc00010.1.g02000.1.am.mkhc	AT5G07920.1	up	158/297(53%)	Lipid/Carbohydrate metabolism	unclear	4e-79
Zjn_sc00011.1.g05910.1.sm.mkhc	AT2G36790.1	up	206/464(44%)	Lipid/Carbohydrate metabolism	unclear	1e-117
Zjn_sc00012.1.g00960.1.am.mk	AT2G31100.1	up	94/200(47%)	Lipid/Carbohydrate metabolism	unclear	2e-49
Zjn_sc00012.1.g04480.1.sm.mkhc	AT1G33811.1	up	121/266(45%)	Lipid/Carbohydrate metabolism	unclear	2e-62
Zjn_sc00013.1.g04370.1.sm.mkhc	AT3G62710.1	up	348/655(53%)	Lipid/Carbohydrate metabolism	unclear	0
Zjn_sc00013.1.g09130.1.sm.mk	AT1G02310.1	up	123/267(46%)	Lipid/Carbohydrate metabolism	unclear	2e-62
Zjn_sc00014.1.g07620.1.sm.mkhc	AT5G62620.1	up	320/627(51%)	Lipid/Carbohydrate metabolism	unclear	1e-173
Zjn_sc00016.1.g01330.1.am.mk	AT1G22180.2	down	41/96(42%)	Lipid/Carbohydrate metabolism	unclear	3e-16
Zjn_sc00016.1.g01340.1.es.mkhc	AT1G22180.3	down	55/119(46%)	Lipid/Carbohydrate metabolism	unclear	4e-28
Zjn_sc00016.1.g03330.1.sm.mk	AT2G36790.1	down	191/484(39%)	Lipid/Carbohydrate metabolism	unclear	6e-96
Zjn_sc00018.1.g01620.1.sm.mkhc	AT1G09510.1	up	139/322(43%)	Lipid/Carbohydrate metabolism	unclear	5e-60
Zjn_sc00018.1.g03890.1.am.mkhc	AT1G77810.2	up	212/364(58%)	Lipid/Carbohydrate metabolism	unclear	1e-119
Zjn_sc00022.1.g01030.1.sm.mkhc	AT5G64570.1	down	230/493(46%)	Lipid/Carbohydrate metabolism	unclear	1e-119
Zjn_sc00023.1.g02330.1.sm.mkhc	AT4G30270.1	down	136/257(52%)	Lipid/Carbohydrate metabolism	Unclear	1e-76
Zjn_sc00027.1.g00800.1.am.mk	AT4G05160.1	up	134/576(23%)	Lipid/Carbohydrate metabolism	unclear	2e-16
Zjn_sc00027.1.g01070.1.sm.mk	AT5G43760.1	up	22/45(48%)	Lipid/Carbohydrate metabolism	unclear	9e-08
Zjn_sc00028.1.g02810.1.sm.mkhc	AT5G27600.1	up	75/105(71%)	Lipid/Carbohydrate metabolism	unclear	3e-38
Zjn_sc00028.1.g03860.1.am.mk	AT1G73880.1	down	125/296(42%)	Lipid/Carbohydrate metabolism	unclear	2e-53
Zjn_sc00028.1.g03940.1.sm.mk	AT5G59320.1	down	49/112(43%)	Lipid/Carbohydrate metabolism	unclear	4e-26
Zjn_sc00028.1.g03950.1.am.mk	AT5G59320.1	down	50/108(46%)	Lipid/Carbohydrate metabolism	unclear	1e-23
Zjn_sc00029.1.g00400.1.sm.mkhc	AT1G28600.1	up	136/281(48%)	Lipid/Carbohydrate metabolism	unclear	7e-75
Zjn_sc00029.1.g04110.1.am.mkhc	AT1G76130.1	up	69/164(42%)	Lipid/Carbohydrate metabolism	unclear	3e-37
Zjn_sc00030.1.g02020.1.am.mk	AT5G33290.1	down	181/388(46%)	Lipid/Carbohydrate metabolism	unclear	2e-97
Zjn_sc00031.1.g01590.1.sm.mkhc	AT4G00550.1	down	226/435(51%)	Lipid/Carbohydrate metabolism	unclear	1e-135
Zjn_sc00034.1.g00260.1.am.mk	AT4G23990.1	up	141/385(36%)	Lipid/Carbohydrate metabolism	unclear	9e-62
Zjn_sc00034.1.g06240.1.am.mk	AT1G08310.1	down	124/316(39%)	Lipid/Carbohydrate metabolism	unclear	3e-57
Zjn_sc00035.1.g01230.1.am.mk	AT1G78960.1	down	38/68(55%)	Lipid/Carbohydrate metabolism	unclear	3e-16
Zjn_sc00036.1.g01190.1.sm.mkhc	AT1G23730.1	down	98/188(52%)	Lipid/Carbohydrate metabolism	unclear	3e-53
Zjn_sc00036.1.g01210.1.sm.mkhc	AT1G23730.1	down	104/222(46%)	Lipid/Carbohydrate metabolism	unclear	6e-53
Zjn_sc00036.1.g01280.1.am.mk	AT2G15480.1	up	116/318(36%)	Lipid/Carbohydrate metabolism	unclear	8e-57
Zjn_sc00040.1.g02740.1.sm.mkhc	AT2G30140.2	up	74/143(51%)	Lipid/Carbohydrate metabolism	unclear	1e-34
Zjn_sc00040.1.g03130.1.am.mk	AT1G02850.5	down	101/190(53%)	Lipid/Carbohydrate metabolism	unclear	1e-48
Zjn_sc00040.1.g04040.1.am.mkhc	AT1G09510.1	down	138/320(43%)	Lipid/Carbohydrate metabolism	unclear	2e-65
Zjn_sc00043.1.g01380.1.sm.mkhc	AT1G27980.1	up	203/305(66%)	Lipid/Carbohydrate metabolism	unclear	1e-108
Zjn_sc00044.1.g01220.1.sm.mkhc	AT4G16690.1	down	88/245(35%)	Lipid/Carbohydrate metabolism	unclear	8e-38
Zjn_sc00044.1.g05150.1.sm.mk	AT1G56600.1	up	83/119(69%)	Lipid/Carbohydrate metabolism	unclear	5e-45
Zjn_sc00045.1.g00970.1.sm.mk	AT2G36790.1	up	78/188(41%)	Lipid/Carbohydrate metabolism	unclear	2e-35
Zjn_sc00047.1.g02190.1.sm.mkhc	AT2G42790.1	up	338/510(66%)	Lipid/Carbohydrate metabolism	Unclear	0
Zjn_sc00047.1.g04010.1.sm.mkhc	AT1G08310.1	down	132/305(43%)	Lipid/Carbohydrate metabolism	unclear	3e-71
Zjn_sc00052.1.g00040.1.am.mk	AT5G64570.1	up	330/756(43%)	Lipid/Carbohydrate metabolism	unclear	1e-164
Zjn_sc00058.1.g02110.1.am.mk	AT1G21240.1	up	39/97(40%)	Lipid/Carbohydrate metabolism	Unclear	1e-11
Zjn_sc00058.1.g02740.1.am.mk	AT1G55850.1	down	253/683(37%)	Lipid/Carbohydrate metabolism	unclear	1e-112
Zjn_sc00067.1.g00640.1.am.mk	AT1G05560.1	up	85/251(33%)	Lipid/Carbohydrate metabolism	unclear	9e-26
Zjn_sc00067.1.g01580.1.sm.mkhc	AT2G16790.2	up	91/180(50%)	Lipid/Carbohydrate metabolism	unclear	8e-48
Zjn_sc00068.1.g03500.1.sm.mk	AT3G12500.1	up	206/305(67%)	Lipid/Carbohydrate metabolism	unclear	1e-128
Zjn_sc00068.1.g03710.1.am.mkhc	AT4G02280.1	up	333/587(56%)	Lipid/Carbohydrate metabolism	unclear	0
Zjn_sc00069.1.g00070.1.am.mk	AT1G17745.1	down	211/319(66%)	Lipid/Carbohydrate metabolism	unclear	1e-115
Zjn_sc00069.1.g03190.1.sm.mkhc	AT2G19450.1	down	185/344(53%)	Lipid/Carbohydrate metabolism	unclear	2e-99
Zjn_sc00069.1.g03310.1.sm.mkhc	AT2G19800.1	up	224/317(70%)	Lipid/Carbohydrate metabolism	unclear	1e-132
Zjn_sc00075.1.g00080.1.am.mk	AT4G08160.1	up	141/263(53%)	Lipid/Carbohydrate metabolism	unclear	1e-84
Zjn_sc00076.1.g00420.1.sm.mkhc	AT5G15140.1	up	146/327(44%)	Lipid/Carbohydrate metabolism	unclear	3e-75
Zjn_sc00078.1.g01390.1.am.mk	AT2G15230.1	up	119/307(38%)	Lipid/Carbohydrate metabolism	unclear	2e-60
Zjn_sc00083.1.g00450.1.am.mk	AT1G64760.1	up	185/375(49%)	Lipid/Carbohydrate metabolism	unclear	8e-98
Zjn_sc00093.1.g01520.1.sm.mk	AT3G50740.1	down	141/467(30%)	Lipid/Carbohydrate metabolism	unclear	9e-53
Zjn_sc00096.1.g00500.1.am.mk	AT5G64570.1	up	374/746(50%)	Lipid/Carbohydrate metabolism	unclear	0
Zjn_sc00096.1.g00590.1.am.mkhc	AT5G20250.3	down	183/471(38%)	Lipid/Carbohydrate metabolism	unclear	1e-85
Zjn_sc00100.1.g00080.1.sm.mkhc	AT1G28600.1	up	118/309(38%)	Lipid/Carbohydrate metabolism	unclear	3e-57
Zjn_sc00100.1.g00090.1.sm.mk	AT1G28600.1	up	139/342(40%)	Lipid/Carbohydrate metabolism	unclear	3e-71
Zjn_sc00100.1.g00100.1.am.mk	AT1G28590.1	up	136/346(39%)	Lipid/Carbohydrate metabolism	unclear	4e-66
Zjn_sc00102.1.g00830.1.am.mk	AT3G12500.1	up	136/241(56%)	Lipid/Carbohydrate metabolism	unclear	2e-80
Zjn_sc00107.1.g00960.1.am.mkhc	AT1G78960.1	down	57/125(45%)	Lipid/Carbohydrate metabolism	unclear	2e-25
Zjn_sc00108.1.g00630.1.am.mk	AT2G36970.1	down	140/253(55%)	Lipid/Carbohydrate metabolism	unclear	2e-78
Zjn_sc00110.1.g00090.1.am.mkhc	AT4G30270.1	down	120/255(47%)	Lipid/Carbohydrate metabolism	Unclear	5e-63
Zjn_sc00110.1.g00170.1.am.mkhc	AT4G30270.1	down	117/270(43%)	Lipid/Carbohydrate metabolism	Unclear	2e-60
Zjn_sc00112.1.g00430.1.sm.mk	AT1G11720.1	up	138/186(74%)	Lipid/Carbohydrate metabolism	unclear	7e-78
Zjn_sc00118.1.g00160.1.sm.mkhc	AT1G78970.2	down	65/128(50%)	Lipid/Carbohydrate metabolism	unclear	2e-29
Zjn_sc00118.1.g00290.1.sm.mkhc	AT2G43820.1	up	181/453(39%)	Lipid/Carbohydrate metabolism	unclear	2e-88
Zjn_sc00122.1.g01080.1.am.mkhc	AT4G10960.1	up	215/360(59%)	Lipid/Carbohydrate metabolism	unclear	1e-119
Zjn_sc00129.1.g00060.1.sm.mkhc	AT1G08940.1	up	177/267(66%)	Lipid/Carbohydrate metabolism	unclear	1e-102
Zjn_sc00130.1.g00340.1.am.mkhc	AT1G09910.1	up	296/636(46%)	Lipid/Carbohydrate metabolism	unclear	1e-153
Zjn_sc00133.1.g00920.1.sm.mkhc	AT1G23730.1	down	110/226(48%)	Lipid/Carbohydrate metabolism	unclear	1e-59
Zjn_sc00133.1.g00930.1.sm.mkhc	AT1G23730.1	up	106/201(52%)	Lipid/Carbohydrate metabolism	unclear	1e-58
Zjn_sc00146.1.g00440.1.am.mk	AT1G20560.1	down	328/565(58%)	Lipid/Carbohydrate metabolism	unclear	0
Zjn_sc00146.1.g00470.1.sm.mkhc	AT1G04970.1	up	64/152(42%)	Lipid/Carbohydrate metabolism	unclear	4e-31
Zjn_sc00152.1.g00050.1.sm.mkhc	AT1G17745.1	down	104/370(28%)	Lipid/Carbohydrate metabolism	unclear	2e-22
Zjn_sc00159.1.g00070.1.am.mk	AT1G33811.1	down	114/348(32%)	Lipid/Carbohydrate metabolism	unclear	3e-46
Zjn_sc00193.1.g00060.1.sm.mk	AT4G30270.1	down	110/236(46%)	Lipid/Carbohydrate metabolism	Unclear	1e-58
Zjn_sc00963.1.g00020.1.am.mk	AT1G48750.1	down	36/88(40%)	Lipid/Carbohydrate metabolism	unclear	7e-15
Zjn_sc00007.1.g05950.1.sm.mkhc	AT3G48000.1	up	392/557(70%)	Lipid/Carbohydrate metabolism:dehydrogenase	Unclear	0
Zjn_sc00015.1.g01030.1.sm.mkhc	AT3G48000.1	down	188/511(36%)	Lipid/Carbohydrate metabolism:dehydrogenase	Unclear	4e-83
Zjn_sc00015.1.g02110.1.sm.mkhc	AT3G48000.1	down	135/500(27%)	Lipid/Carbohydrate metabolism:dehydrogenase	Unclear	2e-40
Zjn_sc00036.1.g03300.1.am.mkhc	AT3G48000.1	down	89/158(56%)	Lipid/Carbohydrate metabolism:dehydrogenase	Unclear	4e-52
Zjn_sc00037.1.g01300.1.am.mk	AT3G48000.1	down	261/480(54%)	Lipid/Carbohydrate metabolism:dehydrogenase	Unclear	1e-150
Zjn_sc00132.1.g00650.1.sm.mkhc	AT3G48000.1	down	135/484(27%)	Lipid/Carbohydrate metabolism:dehydrogenase	Unclear	2e-44
Zjn_sc00062.1.g00560.1.sm.mkhc	AT2G39420.1	up	169/283(59%)	Lipid/Carbohydrate metabolism:esterase/lipase/thioesterase	unclear	1e-103
Zjn_sc00115.1.g00670.1.sm.mk	AT2G39420.1	down	113/300(37%)	Lipid/Carbohydrate metabolism:esterase/lipase/thioesterase	unclear	4e-51
Zjn_sc00034.1.g04660.1.am.mk	AT1G02790.1	up	144/351(41%)	Lipid/Carbohydrate metabolism:Exopolygalacturonase	Unclear	3e-73
Zjn_sc00067.1.g00660.1.sm.mkhc	AT3G05970.1	up	442/684(64%)	Lipid/Carbohydrate metabolism:fatty acid catabolism	Unclear	0
Zjn_sc00067.1.g03470.1.sm.mkhc	AT3G05970.1	up	264/640(41%)	Lipid/Carbohydrate metabolism:fatty acid catabolism	Unclear	1e-132
Zjn_sc00096.1.g01760.1.am.mkhc	AT5G65110.1	up	71/98(72%)	Lipid/Carbohydrate metabolism:fatty acid catabolism	Unclear	4e-39
Zjn_sc00184.1.g00260.1.sm.mkhc	AT4G16760.1	up	218/320(68%)	Lipid/Carbohydrate metabolism:fatty acid catabolism	Unclear	1e-119
PB.15265	AT1G14080.1	down	212/506(41%)	Lipid/Carbohydrate metabolism:fucosyltransferase	Unclear	1e-103
Zjn_sc00051.1.g02940.1.sm.mk	AT1G14080.1	up	205/510(40%)	Lipid/Carbohydrate metabolism:fucosyltransferase	Unclear	1e-102
Zjn_sc00013.1.g10300.1.sm.mk	AT3G03530.1	up	306/479(63%)	Lipid/Carbohydrate metabolism:hydrolase activity	unclear	0
Zjn_sc00012.1.g09930.1.am.mk	AT2G39930.1	down	115/343(33%)	Lipid/Carbohydrate metabolism:isoamylase activity	unclear	5e-41
Zjn_sc00039.1.g00520.1.am.mkhc	AT2G39930.1	down	40/103(38%)	Lipid/Carbohydrate metabolism:isoamylase activity	unclear	3e-13
Zjn_sc00014.1.g07660.1.am.mk	AT2G44300.1	down	60/128(46%)	Lipid/Carbohydrate metabolism:lipid binding	unclear	2e-33
Zjn_sc00030.1.g01520.1.am.mk	AT2G44300.1	down	64/118(54%)	Lipid/Carbohydrate metabolism:lipid binding	unclear	8e-32
Zjn_sc00078.1.g01560.1.am.mkhc	AT2G44300.1	down	54/152(35%)	Lipid/Carbohydrate metabolism:lipid binding	unclear	2e-14
PB.7191	AT3G12120.2	up	266/389(68%)	Lipid/Carbohydrate metabolism:Lipid metabolism	Unclear	1e-164
Zjn_sc00016.1.g03440.1.am.mk	AT3G15730.1	up	555/833(66%)	Lipid/Carbohydrate metabolism:Lipid metabolism	Unclear	0
Zjn_sc00024.1.g02050.1.am.mk	AT3G15730.1	up	516/788(65%)	Lipid/Carbohydrate metabolism:Lipid metabolism	Unclear	0
Zjn_sc00112.1.g00960.1.am.mk	AT4G37990.1	up	204/364(56%)	Lipid/Carbohydrate metabolism:Mannitol	Unclear	1e-114
Zjn_sc00053.1.g00410.1.sm.mkhc	AT2G42010.1	up	495/926(53%)	Lipid/Carbohydrate metabolism:phospholipase D activity	unclear	0
Zjn_sc00017.1.g07640.1.am.mk	AT3G23920.1	up	315/473(66%)	Lipid/Carbohydrate metabolism:Sugar metabolism	Unclear	0
Zjn_sc00043.1.g00130.1.am.mkhc	AT1G67070.1	up	98/193(50%)	Lipid/Carbohydrate metabolism:unclear	unclear	2e-48
Zjn_sc00006.1.g06240.1.am.mk	GSMUA_Achr8T26850_001	down	105/365(28%)	Metabolism of Cofactors and Vitamins	Unclear	2e-21
Zjn_sc00007.1.g08110.1.am.mk	GSMUA_Achr11T23450_001	down	374/617(60%)	Metabolism of Cofactors and Vitamins	Unclear	0
Zjn_sc00012.1.g06340.1.am.mkhc	GSMUA_Achr10T24850_001	down	297/448(66%)	Metabolism of Cofactors and Vitamins	Unclear	1e-172
Zjn_sc00020.1.g00430.1.am.mkhc	GSMUA_Achr10T24850_001	up	407/559(72%)	Metabolism of Cofactors and Vitamins	Unclear	0
Zjn_sc00046.1.g00100.1.sm.mk	GSMUA_Achr8T26850_001	down	59/191(30%)	Metabolism of Cofactors and Vitamins	Unclear	2e-13
PB.5197	GSMUA_Achr4T17630_001	up	89/149(59%)	MISC	Unclear	2e-53
Zjn_sc00001.1.g02920.1.sm.mkhc	GSMUA_Achr9T10860_001	down	69/202(34%)	MISC	Unclear	2e-20
Zjn_sc00002.1.g10360.1.sm.mkhc	GSMUA_Achr11T19570_001	up	145/251(57%)	MISC	Unclear	9e-85
Zjn_sc00007.1.g11050.1.sm.mkhc	GSMUA_Achr1T00250_001	down	72/102(70%)	MISC	Unclear	4e-39
Zjn_sc00008.1.g00860.1.am.mk	GSMUA_Achr5T13670_001	up	100/276(36%)	MISC	Unclear	4e-45
Zjn_sc00009.1.g04580.1.am.mkhc	GSMUA_Achr3T16530_001	up	343/541(63%)	MISC	Unclear	0
Zjn_sc00013.1.g00540.1.am.mk	GSMUA_Achr4T17630_001	up	83/144(57%)	MISC	Unclear	2e-50
Zjn_sc00020.1.g01000.1.sm.mkhc	GSMUA_Achr3T16530_001	up	296/594(49%)	MISC	Unclear	1e-163
Zjn_sc00022.1.g05680.1.am.mk	GSMUA_Achr5T13670_001	down	419/632(66%)	MISC	Unclear	0
Zjn_sc00023.1.g03640.1.am.mkhc	GSMUA_Achr6T19880_001	up	304/361(84%)	MISC	Unclear	1e-176
Zjn_sc00026.1.g01100.1.am.mk	GSMUA_Achr3T32120_001	up	123/209(58%)	MISC	Unclear	6e-74
Zjn_sc00034.1.g05150.1.sm.mkhc	GSMUA_Achr3T16530_001	up	350/527(66%)	MISC	Unclear	0
Zjn_sc00035.1.g00580.1.sm.mkhc	GSMUA_Achr9T10860_001	down	54/160(33%)	MISC	Unclear	2e-17
Zjn_sc00039.1.g03300.1.am.mkhc	GSMUA_Achr5T13670_001	up	177/270(65%)	MISC	Unclear	1e-111
Zjn_sc00044.1.g02750.1.sm.mkhc	GSMUA_Achr9T10860_001	down	65/177(36%)	MISC	Unclear	2e-22
Zjn_sc00059.1.g01940.1.sm.mkhc	GSMUA_Achr5T13670_001	up	260/592(43%)	MISC	Unclear	1e-143
Zjn_sc00066.1.g00010.1.sm.mkhc	GSMUA_Achr1T16300_001	down	153/233(65%)	MISC	Unclear	1e-76
Zjn_sc00078.1.g02630.1.am.mk	GSMUA_Achr6T32510_001	down	36/80(45%)	MISC	Unclear	2e-14
Zjn_sc00097.1.g00550.1.am.mk	GSMUA_Achr5T13670_001	up	103/285(36%)	MISC	Unclear	2e-42
Zjn_sc00127.1.g00290.1.sm.mkhc	GSMUA_Achr9T10860_001	down	54/166(32%)	MISC	Unclear	1e-16
Zjn_sc02562.1.g00010.1.am.mk	GSMUA_Achr6T32510_001	down	67/132(50%)	MISC	Unclear	9e-31
Zjn_sc00013.1.g02370.1.sm.mkhc	GRMZM2G047456_T04	up	437/746(58%)	misc.peroxidases	unclear	0
Zjn_sc00044.1.g05240.1.sm.mk	GRMZM2G170013_T01	down	214/320(66%)	misc.short chain dehydrogenase/reductase (SDR)	unclear	1e-116
PB.5020	GSMUA_Achr11T19390_001	down	168/503(33%)	Not assigned	Unclear	2e-74
Zjn_sc00001.1.g01230.1.sm.mk	GSMUA_Achr8T06690_001	up	38/48(79%)	Not assigned	Unclear	1e-19
Zjn_sc00001.1.g04920.1.sm.mkhc	GSMUA_Achr7T26370_001	up	450/591(76%)	Not assigned	Unclear	0
Zjn_sc00002.1.g05200.1.sm.mk	GSMUA_Achr10T23090_001	up	239/426(56%)	Not assigned	Unclear	1e-137
Zjn_sc00002.1.g05940.1.sm.mkhc	GSMUA_Achr5T28490_001	up	194/712(27%)	Not assigned	Unclear	1e-48
Zjn_sc00002.1.g11380.1.sm.mkhc	GSMUA_AchrUn_randomT22900_001	up	242/364(66%)	Not assigned	Unclear	1e-129
Zjn_sc00002.1.g12430.1.sm.mkhc	GSMUA_Achr10T31050_001	down	45/119(37%)	Not assigned	Unclear	1e-13
Zjn_sc00002.1.g14880.1.sm.mkhc	GSMUA_Achr5T15660_001	down	141/301(46%)	Not assigned	Unclear	3e-61
Zjn_sc00003.1.g01360.1.sm.mk	GSMUA_Achr1T20350_001	up	87/235(37%)	Not assigned	Unclear	3e-39
Zjn_sc00003.1.g03420.1.sm.mkhc	GSMUA_Achr9T04670_001	up	160/461(34%)	Not assigned	Unclear	5e-66
Zjn_sc00003.1.g05900.1.sm.mk	GSMUA_Achr7T11870_001	down	162/371(43%)	Not assigned	Unclear	1e-57
Zjn_sc00003.1.g07630.1.am.mk	GSMUA_Achr3T25720_001	down	143/252(56%)	Not assigned	Unclear	6e-72
Zjn_sc00003.1.g08650.1.sm.mkhc	GSMUA_Achr11T06910_001	down	65/166(39%)	Not assigned	Unclear	5e-21
Zjn_sc00003.1.g08720.1.sm.mkhc	GSMUA_Achr7T19420_001	down	108/343(31%)	Not assigned	Unclear	9e-25
Zjn_sc00003.1.g09150.1.am.mk	GSMUA_AchrUn_randomT22900_001	up	236/353(66%)	Not assigned	Unclear	1e-125
Zjn_sc00003.1.g10550.1.sm.mkhc	GSMUA_Achr1T21840_001	up	124/311(39%)	Not assigned	Unclear	4e-47
Zjn_sc00004.1.g04190.1.sm.mkhc	GSMUA_Achr5T15660_001	up	119/282(42%)	Not assigned	Unclear	2e-44
Zjn_sc00004.1.g08970.1.am.mk	GSMUA_Achr4T27490_001	down	54/106(50%)	Not assigned	Unclear	7e-20
Zjn_sc00005.1.g01360.1.sm.mkhc	GSMUA_Achr8T06310_001	up	454/653(69%)	Not assigned	Unclear	0
Zjn_sc00006.1.g01980.1.am.mk	GSMUA_Achr4T24620_001	down	42/96(43%)	Not assigned	Unclear	1e-14
Zjn_sc00006.1.g04480.1.sm.mk	GSMUA_Achr2T18250_001	down	77/219(35%)	Not assigned	Unclear	7e-32
Zjn_sc00006.1.g04600.1.sm.mkhc	GSMUA_Achr6T00100_001	down	94/265(35%)	Not assigned	Unclear	7e-33
Zjn_sc00007.1.g00920.1.sm.mk	GSMUA_Achr1T05850_001	up	92/258(35%)	Not assigned	Unclear	1e-32
Zjn_sc00007.1.g02470.1.am.mk	GSMUA_Achr2T05020_001	up	279/861(32%)	Not assigned	Unclear	3e-82
Zjn_sc00008.1.g00260.1.sm.mk	GSMUA_Achr5T11090_001	up	35/112(31%)	Not assigned	Unclear	9e-12
Zjn_sc00009.1.g11130.1.am.mk	GSMUA_Achr11T06800_001	down	59/153(38%)	Not assigned	Unclear	8e-19
Zjn_sc00010.1.g02420.1.am.mk	GSMUA_Achr11T19380_001	down	95/319(29%)	Not assigned	Unclear	5e-42
Zjn_sc00011.1.g02510.1.sm.mkhc	GSMUA_Achr1T05000_001	down	102/248(41%)	Not assigned	Unclear	3e-36
Zjn_sc00013.1.g00830.1.sm.mkhc	GSMUA_Achr2T12470_001	up	102/212(48%)	Not assigned	Unclear	2e-40
Zjn_sc00013.1.g01580.1.sm.mk	GSMUA_Achr7T11870_001	down	183/432(42%)	Not assigned	Unclear	7e-70
Zjn_sc00013.1.g04510.1.am.mk	GSMUA_Achr6T00100_001	down	114/265(43%)	Not assigned	Unclear	6e-51
Zjn_sc00013.1.g06160.1.sm.mkhc	GSMUA_Achr6T15870_001	up	50/125(40%)	Not assigned	Unclear	2e-19
Zjn_sc00014.1.g00780.1.am.mkhc	GSMUA_Achr2T12470_001	up	61/74(82%)	Not assigned	Unclear	6e-32
Zjn_sc00014.1.g10060.1.sm.mk	GSMUA_Achr11T19620_001	down	117/203(57%)	Not assigned	Unclear	2e-69
Zjn_sc00015.1.g05980.1.am.mk	GSMUA_Achr3T12280_001	down	149/525(28%)	Not assigned	Unclear	5e-64
Zjn_sc00015.1.g06430.1.am.mk	GSMUA_Achr5T01360_001	up	127/365(34%)	Not assigned	Unclear	2e-54
Zjn_sc00015.1.g06460.1.sm.mk	GSMUA_Achr5T01360_001	up	141/358(39%)	Not assigned	Unclear	7e-66
Zjn_sc00016.1.g00900.1.sm.mkhc	GSMUA_Achr10T13760_001	down	56/107(52%)	Not assigned	Unclear	3e-24
Zjn_sc00016.1.g05880.1.am.mk	GSMUA_Achr11T24680_001	up	67/163(41%)	Not assigned	Unclear	6e-18
Zjn_sc00016.1.g06700.1.am.mkhc	GSMUA_Achr10T18340_001	up	66/143(46%)	Not assigned	Unclear	1e-27
Zjn_sc00017.1.g00960.1.sm.mkhc	GSMUA_Achr5T12000_001	down	78/184(42%)	Not assigned	Unclear	9e-33
Zjn_sc00017.1.g04430.1.am.mk	GSMUA_Achr2T18250_001	up	74/218(33%)	Not assigned	Unclear	8e-31
Zjn_sc00017.1.g06320.1.sm.mkhc	GSMUA_Achr6T09580_001	down	226/584(38%)	Not assigned	Unclear	1e-98
Zjn_sc00018.1.g00450.1.am.mk	GSMUA_Achr4T24360_001	up	138/350(39%)	Not assigned	Unclear	9e-64
Zjn_sc00018.1.g04810.1.am.mk	GSMUA_Achr10T31050_001	down	61/157(38%)	Not assigned	Unclear	7e-19
Zjn_sc00018.1.g07050.1.am.mk	GSMUA_Achr7T11530_001	up	35/80(43%)	Not assigned	Unclear	1e-08
Zjn_sc00018.1.g07680.1.am.mk	GSMUA_Achr11T06900_001	up	56/226(24%)	Not assigned	Unclear	3e-13
Zjn_sc00020.1.g01700.1.am.mk	GSMUA_Achr6T35620_001	up	61/135(45%)	Not assigned	Unclear	1e-27
Zjn_sc00020.1.g01770.1.sm.mk	GSMUA_Achr7T11870_001	up	55/168(32%)	Not assigned	Unclear	1e-13
Zjn_sc00020.1.g02310.1.am.mk	GSMUA_Achr2T18250_001	down	76/215(35%)	Not assigned	Unclear	6e-30
Zjn_sc00020.1.g02490.1.sm.mkhc	GSMUA_Achr10T18340_001	up	493/810(60%)	Not assigned	Unclear	0
Zjn_sc00020.1.g05230.1.sm.mk	GSMUA_Achr3T12280_001	down	103/368(27%)	Not assigned	Unclear	4e-31
Zjn_sc00022.1.g06720.1.sm.mkhc	GSMUA_AchrUn_randomT06110_001	down	41/60(68%)	Not assigned	Unclear	2e-21
Zjn_sc00023.1.g00740.1.sm.mk	GSMUA_Achr1T03850_001	down	65/102(63%)	Not assigned	Unclear	5e-32
Zjn_sc00023.1.g01980.1.am.mk	GSMUA_Achr4T27490_001	down	49/90(54%)	Not assigned	Unclear	2e-15
Zjn_sc00027.1.g01340.1.sm.mk	GSMUA_Achr6T00100_001	down	26/55(47%)	Not assigned	Unclear	1e-10
Zjn_sc00027.1.g05070.1.sm.mkhc	GSMUA_Achr4T32050_001	up	41/80(51%)	Not assigned	Unclear	5e-19
Zjn_sc00028.1.g00390.1.am.mkhc	GSMUA_Achr9T25490_001	down	42/85(49%)	Not assigned	Unclear	7e-18
Zjn_sc00028.1.g02060.1.sm.mkhc	GSMUA_Achr6T07090_001	up	76/157(48%)	Not assigned	Unclear	3e-36
Zjn_sc00028.1.g02290.1.sm.mk	GSMUA_Achr7T11870_001	down	47/136(34%)	Not assigned	Unclear	8e-10
Zjn_sc00030.1.g01290.1.sm.mk	GSMUA_Achr1T24260_001	up	30/63(47%)	Not assigned	Unclear	9e-09
Zjn_sc00031.1.g01120.1.sm.mkhc	GSMUA_Achr6T13410_001	up	146/260(56%)	Not assigned	Unclear	2e-65
Zjn_sc00031.1.g01370.1.am.mk	GSMUA_Achr7T11870_001	down	40/117(34%)	Not assigned	Unclear	9e-10
Zjn_sc00031.1.g01420.1.am.mk	GSMUA_Achr6T35620_001	down	143/306(46%)	Not assigned	Unclear	2e-64
Zjn_sc00034.1.g01630.1.sm.mk	GSMUA_Achr11T19380_001	down	66/236(27%)	Not assigned	Unclear	4e-18
Zjn_sc00034.1.g05360.1.am.mk	GSMUA_Achr5T01360_001	up	153/362(42%)	Not assigned	Unclear	7e-77
Zjn_sc00035.1.g01810.1.am.mk	GSMUA_Achr4T24360_001	up	139/387(35%)	Not assigned	Unclear	3e-62
Zjn_sc00036.1.g02710.1.am.mk	GSMUA_Achr7T23290_001	up	93/218(42%)	Not assigned	Unclear	3e-40
Zjn_sc00037.1.g00560.1.am.mk	GSMUA_Achr3T12280_001	down	85/261(32%)	Not assigned	Unclear	2e-30
Zjn_sc00038.1.g00930.1.am.mkhc	GSMUA_Achr1T13330_001	up	69/106(65%)	Not assigned	Unclear	8e-33
Zjn_sc00038.1.g02910.1.sm.mk	GSMUA_Achr9T26820_001	up	57/108(52%)	Not assigned	Unclear	9e-25
Zjn_sc00040.1.g01020.1.sm.mkhc	GSMUA_Achr4T32050_001	up	126/197(63%)	Not assigned	Unclear	9e-71
Zjn_sc00040.1.g02010.1.sm.mkhc	GSMUA_Achr9T24800_001	up	321/683(46%)	Not assigned	Unclear	1e-155
Zjn_sc00043.1.g00360.1.am.mk	GSMUA_Achr6T09580_001	up	167/384(43%)	Not assigned	Unclear	4e-82
Zjn_sc00043.1.g00410.1.am.mk	GSMUA_Achr4T24360_001	up	151/382(39%)	Not assigned	Unclear	1e-72
Zjn_sc00043.1.g04150.1.am.mk	GSMUA_Achr7T26370_001	down	178/460(38%)	Not assigned	Unclear	2e-79
Zjn_sc00044.1.g01680.1.am.mkhc	GSMUA_Achr8T24560_001	up	228/500(45%)	Not assigned	Unclear	1e-122
Zjn_sc00049.1.g02700.1.am.mk	GSMUA_Achr7T15630_001	down	104/261(39%)	Not assigned	Unclear	8e-35
Zjn_sc00051.1.g00270.1.am.mk	GSMUA_Achr7T23290_001	down	86/211(40%)	Not assigned	Unclear	1e-38
Zjn_sc00058.1.g03920.1.sm.mkhc	GSMUA_Achr9T09830_001	down	74/198(37%)	Not assigned	Unclear	3e-29
Zjn_sc00066.1.g02150.1.sm.mkhc	GSMUA_Achr10T23960_001	up	119/377(31%)	Not assigned	Unclear	5e-40
Zjn_sc00067.1.g02680.1.sm.mkhc	GSMUA_Achr1T20350_001	up	53/119(44%)	Not assigned	Unclear	3e-24
Zjn_sc00069.1.g01920.1.sm.mkhc	GSMUA_Achr3T28070_001	down	64/132(48%)	Not assigned	Unclear	2e-28
Zjn_sc00069.1.g02250.1.sm.mk	GSMUA_Achr6T04700_001	up	51/138(36%)	Not assigned	Unclear	4e-16
Zjn_sc00071.1.g01970.1.am.mkhc	GSMUA_Achr6T36620_001	up	115/288(39%)	Not assigned	Unclear	3e-46
Zjn_sc00071.1.g01980.1.am.mk	GSMUA_Achr1T20450_001	up	114/292(39%)	Not assigned	Unclear	4e-45
Zjn_sc00077.1.g00650.1.sm.mk	GSMUA_Achr6T06840_001	up	52/86(60%)	Not assigned	Unclear	1e-27
Zjn_sc00085.1.g00690.1.sm.mk	GSMUA_Achr6T09560_001	down	222/483(45%)	Not assigned	Unclear	1e-111
Zjn_sc00086.1.g00850.1.sm.mkhc	GSMUA_Achr3T25720_001	up	123/214(57%)	Not assigned	Unclear	4e-62
Zjn_sc00087.1.g00430.1.am.mkhc	GSMUA_Achr7T05840_001	up	89/105(84%)	Not assigned	Unclear	4e-53
Zjn_sc00088.1.g00830.1.am.mk	GSMUA_AchrUn_randomT20950_001	up	40/133(30%)	Not assigned	Unclear	3e-07
Zjn_sc00089.1.g00480.1.sm.mkhc	GSMUA_Achr5T12000_001	down	81/165(49%)	Not assigned	Unclear	1e-39
Zjn_sc00111.1.g00890.1.sm.mkhc	GSMUA_AchrUn_randomT04260_001	up	35/113(30%)	Not assigned	Unclear	5e-09
Zjn_sc00115.1.g01050.1.am.mk	GSMUA_Achr7T15630_001	down	36/107(33%)	Not assigned	Unclear	2e-11
Zjn_sc00126.1.g00220.1.am.mk	GSMUA_Achr6T28320_001	up	95/237(40%)	Not assigned	Unclear	2e-35
Zjn_sc00131.1.g00540.1.sm.mkhc	GSMUA_Achr8T23080_001	up	105/217(48%)	Not assigned	Unclear	4e-42
Zjn_sc00132.1.g01070.1.am.mk	GSMUA_Achr10T31050_001	down	61/167(36%)	Not assigned	Unclear	2e-15
Zjn_sc00135.1.g00510.1.am.mk	GSMUA_Achr4T30630_001	down	96/420(22%)	Not assigned	Unclear	3e-17
Zjn_sc00154.1.g00290.1.sm.mk	GSMUA_Achr3T12280_001	down	98/330(29%)	Not assigned	Unclear	5e-32
Zjn_sc00161.1.g00240.1.am.mkhc	GSMUA_Achr8T26580_001	down	60/129(46%)	Not assigned	Unclear	5e-33
Zjn_sc00197.1.g00080.1.sm.mkhc	GSMUA_Achr9T02390_001	up	204/441(46%)	Not assigned	Unclear	1e-111
Zjn_sc00209.1.g00190.1.sm.mkhc	GSMUA_Achr11T24680_001	up	73/182(40%)	Not assigned	Unclear	3e-26
PB.3062	GRMZM2G076537_T01	down	170/258(65%)	not assigned.unknown	unclear	7e-93
Zjn_sc00011.1.g03920.1.am.mkhc	GRMZM2G076537_T01	down	59/145(40%)	not assigned.unknown	unclear	2e-21
Zjn_sc00015.1.g03510.1.am.mk	GRMZM2G076537_T04	down	192/271(70%)	not assigned.unknown	unclear	1e-116
Zjn_sc00033.1.g01650.1.sm.mkhc	GRMZM2G076537_T05	up	103/340(30%)	not assigned.unknown	unclear	4e-30
Zjn_sc00039.1.g01160.1.sm.mkhc	GRMZM2G425798_T02	up	228/302(75%)	not assigned.unknown	unclear	1e-118
Zjn_sc00043.1.g04830.1.am.mk	GRMZM2G076537_T02	down	66/243(27%)	not assigned.unknown	unclear	4e-08
Zjn_sc00080.1.g00930.1.sm.mk	GRMZM2G055107_T02	down	217/400(54%)	not assigned.unknown	unclear	1e-121
Zjn_sc00080.1.g01030.1.sm.mkhc	GRMZM2G055107_T02	down	218/401(54%)	not assigned.unknown	unclear	1e-120
Zjn_sc00106.1.g01030.1.am.mkhc	GRMZM2G055107_T02	up	218/395(55%)	not assigned.unknown	unclear	1e-119
Zjn_sc00119.1.g00340.1.am.mkhc	GRMZM2G076537_T05	up	349/769(45%)	not assigned.unknown	unclear	1e-162
Zjn_sc00004.1.g08920.1.sm.mk	AT1G73980.1	down	57/252(22%)	Nucleic acid degradation	unclear	2e-10
Zjn_sc00007.1.g07600.1.sm.mk	AT2G19120.1	down	34/87(39%)	Nucleic acid degradation	unclear	4e-11
Zjn_sc00007.1.g08070.1.sm.mkhc	AT1G73980.1	down	47/204(23%)	Nucleic acid degradation	unclear	6e-10
Zjn_sc00007.1.g08850.1.sm.mk	AT2G19120.1	down	255/929(27%)	Nucleic acid degradation	unclear	4e-56
Zjn_sc00022.1.g00820.1.am.mkhc	AT1G77680.1	down	110/347(31%)	Nucleic acid degradation	unclear	2e-33
Zjn_sc00022.1.g02090.1.am.mkhc	AT3G17810.1	up	127/191(66%)	Nucleic acid degradation	unclear	3e-64
Zjn_sc00022.1.g04410.1.sm.mkhc	AT1G73980.1	down	45/195(23%)	Nucleic acid degradation	unclear	2e-09
Zjn_sc00028.1.g03460.1.sm.mk	AT5G04980.2	up	109/259(42%)	Nucleic acid degradation	unclear	1e-41
Zjn_sc00032.1.g01630.1.am.mkhc	AT1G73980.1	up	94/279(33%)	Nucleic acid degradation	unclear	1e-40
Zjn_sc00034.1.g04430.1.sm.mkhc	AT2G39780.1	up	79/246(32%)	Nucleic acid degradation:ribonuclease	unclear	6e-29
Zjn_sc00044.1.g02680.1.am.mkhc	AT2G02990.1	up	113/260(43%)	Nucleic acid degradation:Ribonuclease	Unclear	2e-60
Zjn_sc00044.1.g02690.1.sm.mk	AT2G02990.1	down	98/247(39%)	Nucleic acid degradation:Ribonuclease	Unclear	9e-51
Zjn_sc00029.1.g00570.1.sm.mkhc	AT1G30820.1	down	221/385(57%)	Nucleic acid metabolic process	unclear	1e-110
Zjn_sc00036.1.g00460.1.am.mkhc	AT1G30820.1	down	213/422(50%)	Nucleic acid metabolic process	unclear	1e-94
Zjn_sc00037.1.g00130.1.sm.mkhc	AT1G30820.1	down	82/92(89%)	Nucleic acid metabolic process	unclear	1e-44
Zjn_sc00078.1.g03140.1.am.mkhc	GSMUA_Achr10T16380_001	up	87/138(63%)	Nucleotide metabolism	Unclear	7e-44
Zjn_sc00002.1.g05820.1.am.mk	AT5G06530.2	up	198/615(32%)	Nutrient recycling	unclear	6e-76
Zjn_sc00002.1.g09050.1.sm.mkhc	AT1G62200.1	up	31/53(58%)	Nutrient recycling	unclear	8e-12
Zjn_sc00002.1.g09450.1.sm.mkhc	AT1G10070.2	up	225/337(66%)	Nutrient recycling	unclear	1e-130
Zjn_sc00002.1.g09970.1.sm.mkhc	AT3G22740.1	up	172/318(54%)	Nutrient recycling	unclear	1e-100
Zjn_sc00002.1.g10070.1.sm.mk	AT5G26340.1	up	37/48(77%)	Nutrient recycling	unclear	6e-15
Zjn_sc00002.1.g11580.1.am.mk	AT3G18830.1	down	266/488(54%)	Nutrient recycling	unclear	1e-144
Zjn_sc00002.1.g11620.1.sm.mk	AT1G55920.1	up	121/178(67%)	Nutrient recycling	unclear	1e-66
Zjn_sc00002.1.g12220.1.sm.mkhc	AT5G65380.1	down	121/161(75%)	Nutrient recycling	unclear	2e-67
Zjn_sc00002.1.g13990.1.am.mk	AT5G06530.2	down	119/243(48%)	Nutrient recycling	unclear	3e-51
Zjn_sc00002.1.g14000.1.am.mkhc	AT5G06530.2	down	337/458(73%)	Nutrient recycling	unclear	0
Zjn_sc00002.1.g14770.1.sm.mkhc	AT3G60160.1	up	190/500(38%)	Nutrient recycling	unclear	1e-95
Zjn_sc00002.1.g15400.1.sm.mkhc	AT2G17640.1	down	45/55(81%)	Nutrient recycling	unclear	3e-21
Zjn_sc00002.1.g17170.1.am.mk	AT1G01490.2	up	47/103(45%)	Nutrient recycling	unclear	1e-16
Zjn_sc00003.1.g01180.1.am.mkhc	AT4G20110.1	up	107/165(64%)	Nutrient recycling	unclear	8e-67
Zjn_sc00003.1.g04380.1.sm.mkhc	AT4G00900.1	up	324/431(75%)	Nutrient recycling	unclear	0
Zjn_sc00003.1.g07070.1.sm.mkhc	AT1G79520.1	down	34/48(70%)	Nutrient recycling	unclear	3e-14
Zjn_sc00003.1.g11910.1.am.mkhc	AT5G06530.2	down	361/482(74%)	Nutrient recycling	unclear	0
Zjn_sc00003.1.g12760.1.sm.mkhc	AT3G60160.1	up	189/508(37%)	Nutrient recycling	unclear	3e-90
Zjn_sc00003.1.g13980.1.sm.mkhc	AT1G01490.2	up	94/210(44%)	Nutrient recycling	unclear	5e-36
Zjn_sc00004.1.g05150.1.sm.mkhc	AT3G52310.1	down	122/375(32%)	Nutrient recycling	unclear	3e-45
Zjn_sc00004.1.g10020.1.sm.mkhc	AT2G35060.2	down	211/346(60%)	Nutrient recycling	unclear	1e-117
Zjn_sc00005.1.g00810.1.sm.mkhc	AT3G60160.1	down	560/1389(40%)	Nutrient recycling	unclear	0
Zjn_sc00005.1.g05130.1.sm.mkhc	AT1G21070.1	up	84/210(40%)	Nutrient recycling	unclear	4e-40
Zjn_sc00005.1.g06950.1.sm.mkhc	AT1G79520.1	up	256/380(67%)	Nutrient recycling	unclear	1e-147
Zjn_sc00005.1.g08750.1.es.mkhc	AT1G09560.1	up	132/201(65%)	Nutrient recycling	unclear	3e-74
Zjn_sc00007.1.g04920.1.sm.mkhc	AT4G10380.1	down	106/230(46%)	Nutrient recycling	unclear	3e-57
Zjn_sc00009.1.g01430.1.sm.mkhc	AT1G08820.1	down	85/293(29%)	Nutrient recycling	unclear	1e-23
Zjn_sc00009.1.g07400.1.am.mk	AT5G06530.2	up	184/540(34%)	Nutrient recycling	unclear	9e-72
Zjn_sc00009.1.g12030.1.sm.mkhc	AT1G79520.1	up	247/342(72%)	Nutrient recycling	unclear	1e-145
Zjn_sc00011.1.g00030.1.sm.mk	AT1G28230.1	down	119/332(35%)	Nutrient recycling	unclear	5e-52
Zjn_sc00011.1.g00760.1.am.mk	AT2G47000.1	up	31/73(42%)	Nutrient recycling	unclear	2e-10
Zjn_sc00011.1.g00780.1.sm.mkhc	AT2G47000.1	up	196/360(54%)	Nutrient recycling	unclear	1e-101
Zjn_sc00011.1.g08070.1.cf.mkhc	AT2G47000.1	up	478/719(66%)	Nutrient recycling	unclear	0
Zjn_sc00012.1.g01230.1.am.mkhc	AT1G08920.3	up	121/275(44%)	Nutrient recycling	unclear	2e-64
Zjn_sc00012.1.g04130.1.am.mk	AT1G62200.1	up	239/552(43%)	Nutrient recycling	unclear	1e-127
Zjn_sc00013.1.g08820.1.am.mkhc	AT3G53960.1	up	309/581(53%)	Nutrient recycling	unclear	1e-173
Zjn_sc00014.1.g09070.1.am.mk	AT4G23700.1	down	349/791(44%)	Nutrient recycling	unclear	1e-154
Zjn_sc00015.1.g00200.1.sm.mkhc	AT3G47780.1	up	214/355(60%)	Nutrient recycling	unclear	1e-116
Zjn_sc00016.1.g01940.1.sm.mkhc	AT3G52310.1	down	176/608(28%)	Nutrient recycling	unclear	4e-66
Zjn_sc00016.1.g05200.1.am.mkhc	AT5G46180.1	up	125/409(30%)	Nutrient recycling	unclear	2e-49
Zjn_sc00016.1.g05970.1.am.mk	AT4G23700.1	up	382/881(43%)	Nutrient recycling	unclear	1e-180
Zjn_sc00017.1.g03440.1.am.mk	AT3G62150.1	up	122/374(32%)	Nutrient recycling	unclear	9e-59
Zjn_sc00017.1.g04520.1.sm.mk	AT1G09070.1	down	73/277(26%)	Nutrient recycling	unclear	5e-09
Zjn_sc00018.1.g03010.1.sm.mkhc	AT5G65380.1	down	234/480(48%)	Nutrient recycling	unclear	1e-125
Zjn_sc00018.1.g03770.1.am.mk	AT3G48850.1	up	53/135(39%)	Nutrient recycling	unclear	5e-16
Zjn_sc00018.1.g05560.1.sm.mkhc	AT3G47780.1	up	142/273(52%)	Nutrient recycling	unclear	6e-72
Zjn_sc00019.1.g00030.1.am.mkhc	AT3G21690.1	down	274/429(63%)	Nutrient recycling	unclear	1e-145
Zjn_sc00020.1.g05030.1.sm.mkhc	AT1G21070.1	up	107/302(35%)	Nutrient recycling	unclear	8e-49
Zjn_sc00022.1.g01410.1.sm.mkhc	AT4G10380.1	down	107/230(46%)	Nutrient recycling	unclear	2e-57
Zjn_sc00023.1.g05920.1.sm.mkhc	AT1G01490.2	down	79/180(43%)	Nutrient recycling	unclear	1e-28
Zjn_sc00023.1.g06660.1.am.mk	AT3G18830.1	up	221/445(49%)	Nutrient recycling	unclear	1e-118
Zjn_sc00026.1.g00120.1.sm.mkhc	AT1G61800.1	down	78/217(35%)	Nutrient recycling	unclear	2e-34
Zjn_sc00027.1.g01490.1.sm.mkhc	AT1G08890.1	up	92/269(34%)	Nutrient recycling	unclear	5e-41
Zjn_sc00028.1.g02170.1.am.mk	AT4G21120.1	up	170/374(45%)	Nutrient recycling	unclear	6e-90
Zjn_sc00029.1.g02280.1.sm.mk	AT1G28230.1	up	118/332(35%)	Nutrient recycling	unclear	1e-51
Zjn_sc00029.1.g03230.1.am.mkhc	AT2G47000.1	up	180/383(46%)	Nutrient recycling	unclear	4e-81
Zjn_sc00029.1.g04570.1.sm.mkhc	AT3G62150.1	up	231/494(46%)	Nutrient recycling	unclear	1e-123
Zjn_sc00031.1.g02470.1.am.mk	AT5G06530.2	up	222/565(39%)	Nutrient recycling	unclear	6e-98
Zjn_sc00031.1.g03030.1.am.mk	AT1G77380.1	up	329/467(70%)	Nutrient recycling	unclear	0
Zjn_sc00033.1.g00160.1.am.mkhc	AT3G18830.1	up	276/497(55%)	Nutrient recycling	unclear	1e-156
Zjn_sc00033.1.g00460.1.am.mk	AT3G07100.1	up	61/206(29%)	Nutrient recycling	unclear	6e-07
Zjn_sc00039.1.g01280.1.sm.mkhc	AT3G48850.1	up	202/264(76%)	Nutrient recycling	unclear	1e-122
Zjn_sc00043.1.g05020.1.sm.mkhc	AT1G61800.1	down	29/79(36%)	Nutrient recycling	unclear	2e-09
Zjn_sc00044.1.g04420.1.am.mk	AT1G09070.1	up	91/319(28%)	Nutrient recycling	unclear	1e-18
Zjn_sc00044.1.g04750.1.sm.mk	AT4G20110.1	down	226/431(52%)	Nutrient recycling	unclear	1e-121
Zjn_sc00047.1.g00340.1.sm.mkhc	AT5G53970.1	up	183/327(55%)	Nutrient recycling	unclear	1e-108
Zjn_sc00047.1.g02390.1.sm.mkhc	AT3G18830.1	down	64/155(41%)	Nutrient recycling	unclear	2e-29
Zjn_sc00047.1.g03530.1.am.mk	AT4G10380.1	up	219/326(67%)	Nutrient recycling	unclear	1e-113
Zjn_sc00049.1.g03570.1.am.mk	AT3G48850.1	down	253/368(68%)	Nutrient recycling	unclear	1e-147
Zjn_sc00053.1.g00560.1.am.mk	AT1G01490.2	down	95/193(49%)	Nutrient recycling	unclear	1e-39
Zjn_sc00053.1.g01570.1.sm.mkhc	AT5G38710.1	up	222/437(50%)	Nutrient recycling	unclear	1e-122
Zjn_sc00053.1.g01810.1.am.mk	AT1G12110.1	up	164/292(56%)	Nutrient recycling	unclear	3e-87
Zjn_sc00053.1.g01820.1.am.mk	AT1G12110.1	up	208/304(68%)	Nutrient recycling	unclear	1e-118
Zjn_sc00056.1.g01570.1.am.mk	AT2G24240.1	up	261/442(59%)	Nutrient recycling	unclear	1e-151
Zjn_sc00056.1.g02740.1.sm.mkhc	AT1G65730.1	up	371/553(67%)	Nutrient recycling	unclear	0
Zjn_sc00056.1.g02760.1.sm.mkhc	AT1G65730.1	up	479/661(72%)	Nutrient recycling	unclear	0
Zjn_sc00056.1.g02960.1.sm.mkhc	AT3G52310.1	down	120/398(30%)	Nutrient recycling	unclear	5e-44
Zjn_sc00057.1.g00010.1.am.mkhc	AT5G26340.1	up	125/154(81%)	Nutrient recycling	unclear	1e-66
Zjn_sc00058.1.g01140.1.am.mk	AT5G26340.1	down	218/467(46%)	Nutrient recycling	unclear	1e-119
Zjn_sc00059.1.g00130.1.am.mkhc	AT5G61500.1	up	169/284(59%)	Nutrient recycling	unclear	5e-92
Zjn_sc00060.1.g00120.1.sm.mk	AT1G61800.1	down	137/210(65%)	Nutrient recycling	unclear	3e-71
Zjn_sc00060.1.g00130.1.sm.mkhc	AT1G61800.1	down	124/143(86%)	Nutrient recycling	unclear	6e-72
Zjn_sc00060.1.g00360.1.am.mk	AT3G21690.1	down	278/466(59%)	Nutrient recycling	unclear	1e-149
Zjn_sc00063.1.g03080.1.sm.mkhc	AT1G10010.1	up	143/427(33%)	Nutrient recycling	unclear	6e-53
Zjn_sc00066.1.g01600.1.sm.mkhc	AT1G32410.2	down	40/58(68%)	Nutrient recycling	unclear	1e-17
Zjn_sc00066.1.g02550.1.am.mkhc	AT4G33150.2	up	551/795(69%)	Nutrient recycling	unclear	0
Zjn_sc00068.1.g00400.1.sm.mk	AT4G20110.1	up	230/393(58%)	Nutrient recycling	unclear	1e-135
Zjn_sc00068.1.g00410.1.sm.mkhc	AT4G20110.1	up	149/264(56%)	Nutrient recycling	unclear	2e-94
Zjn_sc00068.1.g01920.1.am.mk	AT1G67940.1	up	180/283(63%)	Nutrient recycling	unclear	3e-92
Zjn_sc00090.1.g00670.1.sm.mkhc	AT3G27020.1	up	257/355(72%)	Nutrient recycling	unclear	1e-153
Zjn_sc00092.1.g01120.1.am.mkhc	AT3G52310.1	down	141/508(27%)	Nutrient recycling	unclear	6e-44
Zjn_sc00096.1.g01270.1.sm.mk	AT3G18830.1	down	232/471(49%)	Nutrient recycling	unclear	1e-128
Zjn_sc00105.1.g01020.1.sm.mk	AT4G23700.1	up	429/763(56%)	Nutrient recycling	unclear	0
Zjn_sc00107.1.g01620.1.sm.mkhc	AT5G26340.1	up	272/497(54%)	Nutrient recycling	unclear	1e-157
Zjn_sc00108.1.g00740.1.sm.mk	AT2G38940.1	up	398/524(75%)	Nutrient recycling	unclear	0
Zjn_sc00110.1.g00900.1.am.mk	AT1G77380.1	down	249/453(54%)	Nutrient recycling	unclear	1e-146
Zjn_sc00135.1.g00190.1.sm.mkhc	AT2G35060.2	up	237/354(66%)	Nutrient recycling	unclear	1e-134
Zjn_sc00184.1.g00280.1.sm.mkhc	AT5G54080.2	up	338/437(77%)	Nutrient recycling	unclear	0
Zjn_sc00203.1.g00100.1.sm.mkhc	AT1G05570.2	up	524/941(55%)	Nutrient recycling	unclear	0
Zjn_sc00228.1.g00110.1.sm.mk	AT5G06530.2	up	197/586(33%)	Nutrient recycling	unclear	3e-78
Zjn_sc00233.1.g00070.1.sm.mkhc	AT1G61800.1	up	259/297(87%)	Nutrient recycling	unclear	1e-155
Zjn_sc00963.1.g00010.1.am.mk	AT1G01490.2	up	47/103(45%)	Nutrient recycling	unclear	2e-16
Zjn_sc11649.1.g00010.1.am.mk	AT5G26340.1	up	111/138(80%)	Nutrient recycling	unclear	3e-64
Zjn_sc11654.1.g00010.1.am.mk	AT5G26340.1	up	108/138(78%)	Nutrient recycling	unclear	2e-63
Zjn_sc00054.1.g00410.1.am.mk	AT1G27080.1	down	190/578(32%)	Nutrient recycling (N)	unclear	3e-82
Zjn_sc00011.1.g05190.1.am.mkhc	AT2G40810.2	up	259/412(62%)	Nutrient recycling(autophagy)	unclear	1e-145
Zjn_sc00007.1.g10700.1.am.mk	AT1G77760.1	up	38/83(45%)	Nutrient recycling(nitrate)	unclear	3e-18
Zjn_sc00034.1.g00210.1.sm.mkhc	AT1G77760.1	down	36/80(45%)	Nutrient recycling(nitrate)	unclear	9e-19
Zjn_sc00022.1.g04420.1.sm.mkhc	AT1G61250.2	down	102/259(39%)	Nutrient recycling(protein transport)	unclear	1e-39
Zjn_sc00036.1.g02690.1.cf.mkhc	AT1G15520.1	up	510/787(64%)	Nutrient recycling:ABC transporter	Unclear	0
Zjn_sc00037.1.g00500.1.cf.mkhc	AT1G15520.1	up	848/1172(72%)	Nutrient recycling:ABC transporter	Unclear	0
Zjn_sc00919.1.g00010.1.sm.mkhc	AT1G15520.1	up	205/252(81%)	Nutrient recycling:ABC transporter	Unclear	1e-115
Zjn_sc00009.1.g11230.1.sm.mkhc	AT5G11520.1	up	346/448(77%)	Nutrient recycling:Amino acid transport	unclear	0
Zjn_sc00040.1.g00540.1.sm.mkhc	AT5G11520.1	down	118/173(68%)	Nutrient recycling:Amino acid transport	unclear	1e-60
Zjn_sc00105.1.g00620.1.sm.mkhc	AT3G03720.2	up	212/462(45%)	Nutrient recycling:Amino acid transport	Unclear	7e-98
Zjn_sc00001.1.g02930.1.sm.mk	AT5G39670.1	down	36/83(43%)	Nutrient recycling:Calcium	Unclear	6e-13
Zjn_sc00044.1.g02730.1.am.mk	AT5G39670.1	down	51/121(42%)	Nutrient recycling:Calcium	Unclear	8e-20
Zjn_sc00009.1.g08800.1.sm.mk	AT3G22600.1	down	44/128(34%)	Nutrient recycling:lipid transfer	unclear	9e-17
Zjn_sc00096.1.g02370.1.am.mk	AT3G22600.1	up	31/107(28%)	Nutrient recycling:lipid transfer	unclear	8e-10
Zjn_sc00002.1.g09010.1.sm.mkhc	LOC_Os03g51080.1	up	427/495(86%)	Nutrient recycling:Macromolecule metabolism	Unclear	0
Zjn_sc00006.1.g02220.1.sm.mkhc	LOC_Os03g51080.1	down	83/97(85%)	Nutrient recycling:Macromolecule metabolism	Unclear	5e-43
Zjn_sc00007.1.g05900.1.am.mkhc	LOC_Os02g49800.1	up	450/571(78%)	Nutrient recycling:Macromolecule metabolism	Unclear	0
Zjn_sc00014.1.g02370.1.sm.mkhc	LOC_Os03g51080.1	up	433/463(93%)	Nutrient recycling:Macromolecule metabolism	Unclear	0
Zjn_sc00017.1.g03880.1.sm.mkhc	LOC_Os02g32520.1	up	279/658(42%)	Nutrient recycling:Macromolecule metabolism	Unclear	1e-137
Zjn_sc00020.1.g02130.1.am.mkhc	LOC_Os02g32520.1	up	547/701(78%)	Nutrient recycling:Macromolecule metabolism	Unclear	0
Zjn_sc00092.1.g01560.1.sm.mkhc	LOC_Os01g52500.1	down	171/544(31%)	Nutrient recycling:Macromolecule metabolism	Unclear	3e-66
Zjn_sc00006.1.g01050.1.am.mk	AT3G07600.1	down	28/77(36%)	Nutrient recycling:metal ion transport	Unclear	4e-07
Zjn_sc00035.1.g00410.1.sm.mkhc	AT3G07600.1	up	57/188(30%)	Nutrient recycling:metal ion transport	Unclear	3e-11
Zjn_sc00194.1.g00060.1.sm.mk	AT3G07600.1	down	47/120(39%)	Nutrient recycling:metal ion transport	Unclear	4e-17
Zjn_sc00006.1.g02170.1.am.mkhc	AT2G02010.1	up	334/447(74%)	Nutrient recycling:N mobilization and transport	Unclear	0
Zjn_sc00015.1.g03120.1.sm.mkhc	AT5G17330.1	down	396/496(79%)	Nutrient recycling:N mobilization and transport	Unclear	0
Zjn_sc00002.1.g12820.1.am.mk	AT3G53150.1	down	45/113(39%)	Nutrient recycling:transferase	Unclear	2e-14
Zjn_sc00004.1.g00460.1.am.mk	AT3G53150.1	down	89/244(36%)	Nutrient recycling:transferase	Unclear	3e-40
Zjn_sc00005.1.g04550.1.sm.mkhc	AT3G53150.1	up	203/482(42%)	Nutrient recycling:transferase	Unclear	6e-95
Zjn_sc00005.1.g04560.1.am.mk	AT3G53150.1	up	134/380(35%)	Nutrient recycling:transferase	Unclear	1e-52
Zjn_sc00011.1.g05900.1.am.mk	AT3G53150.1	up	44/159(27%)	Nutrient recycling:transferase	Unclear	8e-17
Zjn_sc00016.1.g03360.1.am.mk	AT3G53150.1	down	87/263(33%)	Nutrient recycling:transferase	Unclear	4e-41
Zjn_sc00086.1.g01370.1.sm.mk	AT3G53150.1	up	97/246(39%)	Nutrient recycling:transferase	Unclear	8e-46
Zjn_sc00021.1.g01100.1.sm.mkhc	AT4G32940.1	up	206/292(70%)	Nutrient recycling:vacuolar processing enzyme	Unclear	1e-122
PB.10873	AT1G22400.1	down	221/477(46%)	Others	unclear	1e-118
PB.10906	AT1G01390.1	up	200/472(42%)	Others	unclear	1e-100
PB.12067	AT1G22400.1	up	67/163(41%)	Others	unclear	7e-28
PB.14808	AT1G22400.1	down	247/477(51%)	Others	unclear	1e-147
PB.15429	AT1G22400.1	up	139/308(45%)	Others	unclear	4e-75
PB.15896	AT1G01390.1	up	191/456(41%)	Others	unclear	4e-97
PB.2515	AT4G34980.1	up	322/772(41%)	Others	unclear	1e-154
PB.2600	AT1G22400.1	down	246/496(49%)	Others	unclear	1e-144
PB.2796	AT1G22400.1	up	252/477(52%)	Others	unclear	1e-148
PB.2797	AT1G22400.1	up	268/475(56%)	Others	unclear	1e-159
PB.2800	AT5G64230.1	up	109/282(38%)	Others	unclear	2e-49
PB.35	AT3G19020.1	down	134/628(21%)	Others	unclear	3e-10
PB.4230	AT1G01390.1	down	183/470(38%)	Others	unclear	6e-83
PB.4594	AT4G34980.1	up	76/187 (40%)	Others	unclear	1e-35
PB.533	AT1G66670.1	down	53/92(57%)	Others	unclear	9e-27
PB.6191	AT1G22400.1	down	238/476(50%)	Others	unclear	1e-143
PB.6480	AT3G13275.1	up	22/44(50%)	Others	unclear	1e-09
PB.7101	AT1G22400.1	down	260/482(53%)	Others	unclear	1e-157
PB.8164	AT1G01390.1	down	174/482(36%)	Others	unclear	1e-73
PB.845	AT5G35580.1	up	227/336(67%)	Others	unclear	1e-130
PB.8588	AT1G01390.1	up	173/463(37%)	Others	unclear	3e-73
PB.8592	AT1G01390.1	up	160/457(35%)	Others	unclear	2e-68
PB.8653	AT1G22400.1	down	198/480(41%)	Others	unclear	1e-101
PB.8658	AT5G19050.1	up	48/62(77%)	Others	unclear	2e-23
PB.9343	AT1G01390.1	up	203/470(43%)	Others	unclear	1e-103
PB.9720	AT1G01390.1	down	144/393(36%)	Others	unclear	4e-59
PB.987	AT4G34980.1	down	311/770(40%)	Others	unclear	1e-148
Zjn_sc00001.1.g01280.1.sm.mk	AT4G31380.1	down	53/123(43%)	Others	unclear	7e-19
Zjn_sc00001.1.g01870.1.am.mk	AT3G57380.1	down	211/421(50%)	Others	unclear	1e-119
Zjn_sc00001.1.g02100.1.am.mkhc	AT5G63120.2	down	79/232(34%)	Others	unclear	1e-27
Zjn_sc00001.1.g03010.1.sm.mk	AT1G29810.1	down	35/107(32%)	Others	unclear	2e-10
Zjn_sc00001.1.g03540.1.sm.mk	AT4G03390.1	down	49/73(67%)	Others	unclear	3e-22
Zjn_sc00001.1.g04290.1.sm.mkhc	AT5G24420.1	up	97/208(46%)	Others	unclear	2e-45
Zjn_sc00001.1.g05510.1.am.mkhc	AT4G31820.1	up	139/470(29%)	Others	unclear	8e-48
Zjn_sc00001.1.g06300.1.sm.mkhc	AT2G41870.1	down	129/279(46%)	Others	unclear	3e-55
Zjn_sc00001.1.g06730.1.sm.mk	AT1G11210.1	up	106/356(29%)	Others	unclear	2e-21
Zjn_sc00001.1.g07530.1.sm.mk	AT3G57190.1	down	130/366(35%)	Others	unclear	1e-58
Zjn_sc00001.1.g07720.1.am.mk	AT4G15210.1	down	305/499(61%)	Others	unclear	0
Zjn_sc00001.1.g08870.1.sm.mkhc	AT3G25740.1	down	92/147(62%)	Others	unclear	2e-48
Zjn_sc00001.1.g10260.1.am.mk	AT4G26160.1	down	48/146(32%)	Others	unclear	3e-11
Zjn_sc00001.1.g12030.1.sm.mkhc	AT5G64740.1	down	771/1109(69%)	Others	unclear	0
Zjn_sc00002.1.g00430.1.am.mk	AT3G21520.1	up	77/185(41%)	Others	unclear	2e-41
Zjn_sc00002.1.g01690.1.sm.mkhc	AT5G03380.1	down	106/416(25%)	Others	unclear	2e-22
Zjn_sc00002.1.g02930.1.sm.mkhc	AT3G25610.1	up	265/709(37%)	Others	unclear	1e-116
Zjn_sc00002.1.g04040.1.am.mk	AT3G62420.1	down	49/138(35%)	Others	unclear	1e-14
Zjn_sc00002.1.g06850.1.sm.mkhc	AT5G05840.1	up	135/249(54%)	Others	unclear	6e-66
Zjn_sc00002.1.g06880.1.sm.mkhc	AT5G64380.1	down	85/166(51%)	Others	unclear	5e-45
Zjn_sc00002.1.g07680.1.sm.mkhc	AT5G56870.1	up	375/737(50%)	Others	unclear	0
Zjn_sc00002.1.g08450.1.am.mk	NM_001158483.1	down	114/128(89%)	Others	unclear	7e-60
Zjn_sc00002.1.g09550.1.am.mk	AT3G54850.1	down	113/391(28%)	Others	unclear	1e-29
Zjn_sc00002.1.g10850.1.am.mk	AT4G31820.1	down	50/143(34%)	Others	unclear	4e-21
Zjn_sc00002.1.g11350.1.sm.mk	AT5G67620.1	up	90/209(43%)	Others	unclear	3e-35
Zjn_sc00002.1.g12180.1.am.mk	AT3G01700.1	down	53/134(39%)	Others	unclear	1e-12
Zjn_sc00002.1.g13310.1.sm.mkhc	AT5G39520.1	up	83/189(43%)	Others	unclear	5e-42
Zjn_sc00002.1.g13660.1.am.mk	AT4G32480.1	down	52/124(41%)	Others	unclear	5e-25
Zjn_sc00002.1.g13810.1.sm.mk	AT3G51895.1	up	43/98(43%)	Others	unclear	3e-16
Zjn_sc00002.1.g14120.1.sm.mkhc	AT5G03380.1	up	130/392(33%)	Others	unclear	1e-46
Zjn_sc00002.1.g14470.1.sm.mkhc	AT3G16240.1	down	148/248(59%)	Others	unclear	5e-80
Zjn_sc00002.1.g15370.1.sm.mkhc	AT2G47730.1	down	91/218(41%)	Others	unclear	3e-47
Zjn_sc00002.1.g17040.1.sm.mk	AT4G24110.1	down	84/240(35%)	Others	unclear	2e-26
Zjn_sc00002.1.g17330.1.am.mkhc	AT5G22940.1	up	244/438(55%)	Others	unclear	1e-134
Zjn_sc00002.1.g17600.1.am.mk	NM_001111815.1	up	120/266(45%)	Others	unclear	3e-67
Zjn_sc00003.1.g03080.1.am.mk	AT3G62630.1	down	150/388(38%)	Others	unclear	4e-52
Zjn_sc00003.1.g04010.1.am.mk	AT1G07900.1	up	101/161(62%)	Others	unclear	1e-51
Zjn_sc00003.1.g05070.1.sm.mkhc	AT5G02230.2	up	186/281(66%)	Others	unclear	1e-104
Zjn_sc00003.1.g05450.1.sm.mk	AT5G05840.1	up	132/242(54%)	Others	unclear	1e-64
Zjn_sc00003.1.g05480.1.sm.mkhc	AT5G64380.1	down	144/332(43%)	Others	unclear	3e-71
Zjn_sc00003.1.g05850.1.sm.mkhc	AT3G54200.1	up	47/191(24%)	Others	unclear	5e-10
Zjn_sc00003.1.g06660.1.am.mk	AT2G16700.1	up	98/154(63%)	Others	unclear	7e-52
Zjn_sc00003.1.g08640.1.am.mk	AT4G31820.1	down	67/206(32%)	Others	unclear	8e-28
Zjn_sc00003.1.g08780.1.sm.mk	AT4G31820.1	down	136/270(50%)	Others	unclear	3e-71
Zjn_sc00003.1.g09080.1.am.mk	AT5G67620.1	up	55/88(62%)	Others	unclear	1e-26
Zjn_sc00003.1.g10580.1.sm.mk	NM_001158483.1	down	51/142(35%)	Others	unclear	3e-19
Zjn_sc00003.1.g11200.1.am.mkhc	AT3G01850.1	down	36/75(48%)	Others	unclear	9e-14
Zjn_sc00003.1.g11310.1.am.mk	AT5G05840.1	up	118/323(36%)	Others	unclear	4e-50
Zjn_sc00003.1.g12310.1.sm.mk	AT4G08290.1	up	80/207(38%)	Others	unclear	1e-43
Zjn_sc00003.1.g12570.1.am.mk	AT3G16240.1	down	148/248(59%)	Others	unclear	6e-80
Zjn_sc00003.1.g12900.1.sm.mkhc	AT5G43980.1	up	117/279(41%)	Others	unclear	8e-59
Zjn_sc00003.1.g13160.1.am.mk	AT1G20330.1	down	257/365(70%)	Others	unclear	1e-157
Zjn_sc00003.1.g13690.1.am.mk	AT4G30190.1	down	352/494(71%)	Others	unclear	0
Zjn_sc00003.1.g13740.1.sm.mk	AT4G35480.1	down	81/169(47%)	Others	unclear	4e-37
Zjn_sc00003.1.g14460.1.sm.mkhc	AT2G18196.1	down	105/198(53%)	Others	unclear	2e-54
Zjn_sc00003.1.g14660.1.sm.mk	AT3G61080.1	down	59/86(68%)	Others	unclear	3e-30
Zjn_sc00004.1.g00540.1.sm.mkhc	AT1G44800.1	up	184/376(48%)	Others	unclear	1e-100
Zjn_sc00004.1.g01520.1.am.mk	P16167.1	down	203/292(69%)	Others	unclear	1e-103
Zjn_sc00004.1.g04150.1.sm.mk	AT4G10280.1	down	34/92(36%)	Others	unclear	1e-15
Zjn_sc00004.1.g04320.1.sm.mkhc	AT4G21760.1	up	188/439(42%)	Others	unclear	2e-98
Zjn_sc00004.1.g05380.1.sm.mkhc	AT3G47350.2	down	59/259(22%)	Others	unclear	5e-11
Zjn_sc00004.1.g06030.1.am.mk	AT3G15040.1	down	64/163(39%)	Others	unclear	1e-19
Zjn_sc00004.1.g06610.1.sm.mkhc	AT4G25170.1	up	91/314(28%)	Others	unclear	2e-22
Zjn_sc00004.1.g07410.1.sm.mkhc	AT2G05440.2	down	41/107(38%)	Others	unclear	5e-09
Zjn_sc00004.1.g07680.1.am.mk	AT4G25490.1	down	82/186(44%)	Others	unclear	7e-34
Zjn_sc00004.1.g08440.1.am.mk	AT5G47060.1	down	44/88(50%)	Others	unclear	1e-18
Zjn_sc00004.1.g08490.1.sm.mkhc	AT4G17670.1	down	40/90(44%)	Others	unclear	8e-19
Zjn_sc00004.1.g08510.1.am.mk	AT4G17670.1	down	40/92(43%)	Others	unclear	1e-13
Zjn_sc00004.1.g09940.1.am.mk	AT4G37970.1	down	175/327(53%)	Others	unclear	1e-105
Zjn_sc00004.1.g10150.1.sm.mkhc	AT4G20460.1	up	140/167(83%)	Others	unclear	8e-84
Zjn_sc00004.1.g12030.1.sm.mkhc	AT3G15990.1	down	24/46(52%)	Others	unclear	2e-09
Zjn_sc00004.1.g13650.1.am.mk	AT4G27450.1	up	163/254(64%)	Others	unclear	1e-92
Zjn_sc00005.1.g01290.1.am.mk	AT1G15690.1	up	523/680(76%)	Others	unclear	0
Zjn_sc00005.1.g01580.1.sm.mkhc	AT1G02470.1	down	74/152(48%)	Others	unclear	1e-39
Zjn_sc00005.1.g01610.1.sm.mk	AT4G23190.1	up	132/463(28%)	Others	unclear	1e-49
Zjn_sc00005.1.g02370.1.am.mk	AT3G62880.2	down	26/62(41%)	Others	unclear	3e-07
Zjn_sc00005.1.g03190.1.sm.mkhc	AT3G13720.1	up	92/180(51%)	Others	unclear	1e-45
Zjn_sc00005.1.g04620.1.sm.mk	AT4G32510.1	down	188/388(48%)	Others	unclear	8e-94
Zjn_sc00005.1.g05510.1.am.mk	AT5G17650.1	down	68/173(39%)	Others	unclear	1e-21
Zjn_sc00005.1.g05950.1.sm.mk	AT5G55000.1	down	42/105(40%)	Others	unclear	1e-10
Zjn_sc00005.1.g06040.1.am.mk	AT3G54140.1	up	392/570(68%)	Others	unclear	0
Zjn_sc00005.1.g06390.1.am.mk	AT4G03420.1	up	59/161(36%)	Others	unclear	2e-21
Zjn_sc00005.1.g06400.1.am.mk	AT4G03420.1	up	64/169(37%)	Others	unclear	5e-18
Zjn_sc00005.1.g06570.1.am.mk	AT3G46230.1	down	70/144(48%)	Others	unclear	2e-31
Zjn_sc00005.1.g08450.1.am.mk	AT5G40960.1	down	29/69(42%)	Others	unclear	3e-10
Zjn_sc00005.1.g09270.1.sm.mkhc	AT5G47280.1	up	27/66(40%)	Others	unclear	9e-10
Zjn_sc00006.1.g00110.1.sm.mk	AT3G25250.1	up	226/453(49%)	Others	unclear	1e-113
Zjn_sc00006.1.g00890.1.sm.mk	AT5G58170.1	up	153/393(38%)	Others	unclear	5e-69
Zjn_sc00006.1.g01290.1.sm.mkhc	AT1G23130.1	down	40/152(26%)	Others	unclear	2e-11
Zjn_sc00006.1.g01730.1.am.mk	AT5G23270.1	down	254/511(49%)	Others	unclear	1e-142
Zjn_sc00006.1.g01760.1.sm.mk	AT5G23270.1	up	228/505(45%)	Others	unclear	1e-121
Zjn_sc00006.1.g04130.1.sm.mkhc	AT5G03650.1	down	139/222(62%)	Others	unclear	3e-80
Zjn_sc00006.1.g04190.1.am.mk	AT3G13229.1	up	80/264(30%)	Others	unclear	2e-26
Zjn_sc00007.1.g01220.1.am.mkhc	AT5G19440.1	up	137/326(42%)	Others	unclear	1e-68
Zjn_sc00007.1.g02780.1.am.mk	AT1G54050.1	down	72/131(54%)	Others	unclear	3e-36
Zjn_sc00007.1.g03270.1.sm.mk	AT2G31945.1	up	41/72(56%)	Others	unclear	4e-15
Zjn_sc00007.1.g03460.1.sm.mkhc	AT3G24740.2	up	98/233(42%)	Others	unclear	7e-47
Zjn_sc00007.1.g04620.1.am.mk	AT3G19020.1	down	38/111(34%)	Others	unclear	1e-10
Zjn_sc00007.1.g04640.1.sm.mkhc	AT5G03260.1	up	270/567(47%)	Others	unclear	1e-156
Zjn_sc00007.1.g05420.1.am.mk	AT3G54850.1	down	125/407(30%)	Others	unclear	1e-31
Zjn_sc00007.1.g05670.1.sm.mkhc	AT2G01670.1	down	84/158(53%)	Others	unclear	1e-41
Zjn_sc00007.1.g05970.1.am.mk	AT5G01880.1	down	49/136(36%)	Others	unclear	7e-16
Zjn_sc00007.1.g06060.1.sm.mk	XM_002454298.1	up	315/419(75%)	Others	unclear	0
Zjn_sc00007.1.g06070.1.sm.mk	XM_002454299.1	up	245/324(75%)	Others	unclear	1e-141
Zjn_sc00007.1.g06430.1.am.mk	AT5G09220.1	up	222/451(49%)	Others	unclear	1e-130
Zjn_sc00007.1.g06450.1.sm.mkhc	AT3G13772.1	up	284/658(43%)	Others	unclear	1e-150
Zjn_sc00007.1.g06560.1.sm.mk	AT1G15125.1	down	103/332(31%)	Others	unclear	3e-34
Zjn_sc00007.1.g08270.1.sm.mkhc	AT4G17790.1	up	100/146(68%)	Others	unclear	3e-52
Zjn_sc00007.1.g08740.1.am.mk	AT5G47060.1	up	33/60(55%)	Others	unclear	1e-15
Zjn_sc00007.1.g08860.1.sm.mk	AT5G02590.1	down	21/58(36%)	Others	unclear	4e-07
Zjn_sc00007.1.g09250.1.sm.mk	AT4G25490.1	down	84/217(38%)	Others	unclear	3e-28
Zjn_sc00007.1.g09300.1.sm.mkhc	AT1G12640.1	up	328/473(69%)	Others	unclear	0
Zjn_sc00007.1.g09600.1.sm.mk	AT4G38250.1	up	250/436(57%)	Others	unclear	1e-129
Zjn_sc00007.1.g10550.1.am.mk	AT5G02890.1	down	81/251(32%)	Others	unclear	7e-28
Zjn_sc00007.1.g10940.1.am.mkhc	AT3G49590.2	up	136/356(38%)	Others	unclear	2e-39
Zjn_sc00008.1.g00200.1.sm.mkhc	AT5G17230.1	down	275/407(67%)	Others	unclear	1e-147
Zjn_sc00008.1.g00520.1.am.mk	AT1G20180.1	up	42/98(42%)	Others	unclear	7e-16
Zjn_sc00008.1.g01320.1.am.mk	AT3G43120.1	up	32/66(48%)	Others	unclear	2e-13
Zjn_sc00008.1.g01410.1.am.mkhc	AT4G30110.1	up	461/947(48%)	Others	unclear	0
Zjn_sc00008.1.g01780.1.sm.mk	AT4G25910.1	down	108/135(80%)	Others	unclear	5e-58
Zjn_sc00008.1.g03380.1.sm.mkhc	AT4G03390.1	up	133/342(38%)	Others	unclear	4e-57
Zjn_sc00008.1.g05220.1.am.mk	AT3G57880.1	up	314/423(74%)	Others	unclear	0
Zjn_sc00008.1.g05610.1.sm.mk	AT4G21160.4	down	96/163(58%)	Others	unclear	6e-51
Zjn_sc00008.1.g05970.1.am.mk	AT5G17000.1	up	167/378(44%)	Others	unclear	4e-86
Zjn_sc00008.1.g06590.1.am.mk	AT5G62730.1	up	212/461(45%)	Others	unclear	1e-95
Zjn_sc00008.1.g06730.1.am.mk	NM_001155040.1	down	121/285(42%)	Others	unclear	7e-63
Zjn_sc00008.1.g07010.1.sm.mkhc	AT3G25610.1	up	150/268(55%)	Others	unclear	2e-80
Zjn_sc00008.1.g07470.1.sm.mkhc	AT3G50750.1	up	122/274(44%)	Others	unclear	4e-46
Zjn_sc00008.1.g07740.1.am.mk	AT5G46230.1	up	71/140(50%)	Others	unclear	3e-36
Zjn_sc00008.1.g08490.1.sm.mk	AT1G27290.2	up	55/130(42%)	Others	unclear	2e-21
Zjn_sc00008.1.g09780.1.am.mk	AT2G20700.1	down	59/121(48%)	Others	unclear	6e-32
Zjn_sc00008.1.g09980.1.sm.mkhc	AT2G44280.1	up	164/363(45%)	Others	unclear	3e-81
Zjn_sc00008.1.g10280.1.am.mkhc	AT3G19020.1	up	47/127(37%)	Others	unclear	1e-15
Zjn_sc00008.1.g10380.1.am.mk	AT3G13229.1	down	41/144(28%)	Others	unclear	3e-13
Zjn_sc00008.1.g10470.1.sm.mkhc	AT4G14950.1	up	20/33(60%)	Others	unclear	2e-07
Zjn_sc00008.1.g10600.1.sm.mkhc	AT2G41870.1	down	137/289(47%)	Others	unclear	7e-60
Zjn_sc00008.1.g11230.1.am.mk	AT4G27350.1	up	145/278(52%)	Others	unclear	3e-81
Zjn_sc00008.1.g11690.1.am.mk	AT5G16910.1	down	373/873(42%)	Others	unclear	0
Zjn_sc00009.1.g00670.1.sm.mkhc	AT1G71190.2	up	96/193(49%)	Others	unclear	4e-49
Zjn_sc00009.1.g00870.1.sm.mk	AT1G28190.1	down	59/187(31%)	Others	unclear	9e-14
Zjn_sc00009.1.g03100.1.sm.mk	AT5G16380.1	down	51/111(45%)	Others	unclear	5e-26
Zjn_sc00009.1.g03120.1.sm.mkhc	AT5G16400.1	down	92/122(75%)	Others	unclear	6e-50
Zjn_sc00009.1.g03430.1.sm.mkhc	AT5G01520.1	up	120/240(50%)	Others	unclear	2e-59
Zjn_sc00009.1.g03530.1.sm.mk	AT3G54140.1	up	298/540(55%)	Others	unclear	1e-168
Zjn_sc00009.1.g04270.1.sm.mkhc	AT1G23060.1	down	55/207(26%)	Others	unclear	1e-07
Zjn_sc00009.1.g04640.1.sm.mkhc	AT4G15093.1	up	159/264(60%)	Others	unclear	1e-89
Zjn_sc00009.1.g05360.1.sm.mkhc	AT5G64380.1	down	127/310(40%)	Others	unclear	3e-62
Zjn_sc00009.1.g05640.1.am.mkhc	AT3G52570.1	up	46/81(56%)	Others	unclear	2e-22
Zjn_sc00009.1.g05970.1.sm.mk	AT5G58782.1	down	84/166(50%)	Others	unclear	2e-42
Zjn_sc00009.1.g06110.1.am.mk	AT2G40000.1	up	206/476(43%)	Others	unclear	1e-105
Zjn_sc00009.1.g06460.1.sm.mkhc	AT5G64380.1	down	92/330(27%)	Others	unclear	6e-18
Zjn_sc00009.1.g06560.1.am.mk	AT3G54000.1	up	102/364(28%)	Others	unclear	3e-13
Zjn_sc00009.1.g07430.1.am.mk	AT5G53420.1	up	38/117(32%)	Others	unclear	8e-09
Zjn_sc00009.1.g08500.1.sm.mk	AT2G38640.1	down	83/222(37%)	Others	unclear	1e-31
Zjn_sc00009.1.g09240.1.sm.mkhc	AT3G56620.1	up	176/333(52%)	Others	unclear	4e-96
Zjn_sc00009.1.g11000.1.am.mkhc	AT5G58170.1	up	26/87(29%)	Others	unclear	5e-08
Zjn_sc00010.1.g00250.1.sm.mkhc	AT4G39770.1	up	197/305(64%)	Others	unclear	1e-107
Zjn_sc00010.1.g01150.1.am.mk	AT1G74940.1	down	63/190(33%)	Others	unclear	2e-13
Zjn_sc00010.1.g01660.1.sm.mkhc	AT3G16860.1	up	125/459(27%)	Others	unclear	2e-32
Zjn_sc00010.1.g03690.1.am.mk	AT5G03260.1	up	249/531(46%)	Others	unclear	1e-132
Zjn_sc00010.1.g04840.1.sm.mkhc	AT5G33280.1	up	398/765(52%)	Others	unclear	0
Zjn_sc00011.1.g00950.1.sm.mk	AT1G15125.1	up	112/367(30%)	Others	unclear	8e-42
Zjn_sc00011.1.g01890.1.sm.mk	AT3G51895.1	up	75/168(44%)	Others	unclear	2e-42
Zjn_sc00011.1.g02160.1.am.mk	AT1G29640.1	up	35/81(43%)	Others	unclear	1e-10
Zjn_sc00011.1.g02180.1.am.mk	AM939937.1	up	35/51(68%)	Others	unclear	1e-13
Zjn_sc00011.1.g03210.1.sm.mkhc	AT4G32480.1	down	111/268(41%)	Others	unclear	2e-54
Zjn_sc00011.1.g03840.1.am.mk	AT3G46230.1	down	66/144(45%)	Others	unclear	4e-29
Zjn_sc00011.1.g05010.1.am.mk	AT5G64190.1	up	138/308(44%)	Others	unclear	7e-69
Zjn_sc00011.1.g05620.1.am.mk	AT5G62200.1	down	54/117(46%)	Others	unclear	1e-26
Zjn_sc00011.1.g06260.1.am.mk	AT3G24460.1	up	179/335(53%)	Others	unclear	1e-111
Zjn_sc00011.1.g07050.1.am.mk	AT3G49260.3	up	85/199(42%)	Others	unclear	1e-24
Zjn_sc00012.1.g00060.1.sm.mkhc	AT5G53420.1	down	113/257(43%)	Others	unclear	3e-52
Zjn_sc00012.1.g00330.1.sm.mk	AT3G19020.1	up	41/139(29%)	Others	unclear	1e-08
Zjn_sc00012.1.g01130.1.sm.mkhc	AT4G23920.1	up	284/351(80%)	Others	unclear	1e-169
Zjn_sc00012.1.g01180.1.am.mk	AT5G62770.1	down	58/235(24%)	Others	unclear	2e-08
Zjn_sc00012.1.g02430.1.sm.mk	AT3G18260.1	up	72/216(33%)	Others	unclear	3e-28
Zjn_sc00012.1.g02870.1.sm.mkhc	AT5G11950.1	down	137/200(68%)	Others	unclear	2e-74
Zjn_sc00012.1.g04900.1.am.mkhc	AT3G19020.1	up	68/197(34%)	Others	unclear	3e-16
Zjn_sc00012.1.g05800.1.sm.mk	AT1G22460.1	up	172/382(45%)	Others	unclear	5e-91
Zjn_sc00012.1.g05950.1.am.mkhc	AT5G59080.1	up	43/129(33%)	Others	unclear	3e-11
Zjn_sc00012.1.g06840.1.sm.mkhc	AT4G33070.1	up	192/252(76%)	Others	unclear	1e-106
Zjn_sc00012.1.g07510.1.am.mk	AT2G38640.1	down	90/214(42%)	Others	unclear	5e-32
Zjn_sc00012.1.g08450.1.sm.mkhc	AT5G48850.1	up	181/284(63%)	Others	unclear	1e-101
Zjn_sc00012.1.g08570.1.am.mk	AT3G15810.1	down	92/205(44%)	Others	unclear	8e-41
Zjn_sc00012.1.g08850.1.sm.mkhc	AT4G19645.1	up	31/54(57%)	Others	unclear	2e-10
Zjn_sc00012.1.g08880.1.sm.mkhc	AT3G28180.1	up	423/673(62%)	Others	unclear	0
Zjn_sc00012.1.g09510.1.sm.mkhc	AT4G04800.1	down	29/43(67%)	Others	unclear	1e-11
Zjn_sc00013.1.g01450.1.sm.mkhc	AT5G14320.1	down	100/167(59%)	Others	unclear	3e-51
Zjn_sc00013.1.g01760.1.sm.mkhc	AT1G18170.1	down	137/231(59%)	Others	unclear	9e-69
Zjn_sc00013.1.g04300.1.sm.mkhc	AT5G16840.3	up	107/254(42%)	Others	unclear	2e-45
Zjn_sc00013.1.g05710.1.sm.mk	AT4G02410.1	down	171/371(46%)	Others	unclear	3e-87
Zjn_sc00013.1.g06470.1.sm.mk	AT3G52400.1	down	160/302(52%)	Others	unclear	3e-83
Zjn_sc00013.1.g07850.1.sm.mkhc	AT5G64740.1	down	675/1086(62%)	Others	unclear	0
Zjn_sc00013.1.g09110.1.sm.mkhc	AT5G63120.2	down	116/311(37%)	Others	unclear	5e-55
Zjn_sc00014.1.g00810.1.am.mkhc	AT5G19860.1	up	50/125(40%)	Others	unclear	5e-29
Zjn_sc00014.1.g01240.1.sm.mkhc	AT1G44770.2	up	43/110(39%)	Others	unclear	3e-10
Zjn_sc00014.1.g01410.1.sm.mkhc	AT3G26070.1	down	116/202(57%)	Others	unclear	5e-58
Zjn_sc00014.1.g02680.1.sm.mkhc	AT1G10040.2	down	44/66(66%)	Others	unclear	5e-23
Zjn_sc00014.1.g03260.1.sm.mk	AT3G57450.1	down	37/73(50%)	Others	unclear	4e-13
Zjn_sc00014.1.g03330.1.am.mk	AT2G31820.1	up	126/492(25%)	Others	unclear	1e-35
Zjn_sc00014.1.g03360.1.sm.mk	AT4G00400.1	up	272/497(54%)	Others	unclear	1e-152
Zjn_sc00014.1.g03440.1.am.mk	AT3G52400.1	down	129/308(41%)	Others	unclear	1e-60
Zjn_sc00014.1.g04160.1.sm.mkhc	AT5G16840.3	up	105/263(39%)	Others	unclear	1e-48
Zjn_sc00014.1.g04490.1.sm.mk	AT4G01840.1	down	37/94(39%)	Others	unclear	4e-13
Zjn_sc00014.1.g05700.1.am.mk	AT3G50810.1	down	66/146(45%)	Others	unclear	6e-32
Zjn_sc00014.1.g05780.1.sm.mkhc	AT3G28180.1	down	400/647(61%)	Others	unclear	0
Zjn_sc00014.1.g06430.1.sm.mkhc	AT1G71100.1	down	68/261(26%)	Others	unclear	8e-15
Zjn_sc00014.1.g06760.1.am.mk	AT3G52400.1	down	161/305(52%)	Others	unclear	5e-84
Zjn_sc00014.1.g07060.1.am.mk	AT2G32030.1	up	81/166(48%)	Others	unclear	4e-42
Zjn_sc00014.1.g08380.1.sm.mkhc	AT5G01750.2	down	77/187(41%)	Others	unclear	2e-38
Zjn_sc00014.1.g08430.1.sm.mkhc	LOC_Os03g60350.1	up	105/112(93%)	Others	unclear	4e-64
Zjn_sc00014.1.g08460.1.sm.mkhc	AT5G19440.1	down	145/322(45%)	Others	unclear	2e-68
Zjn_sc00014.1.g08540.1.sm.mkhc	AT5G02600.2	down	53/86(61%)	Others	unclear	3e-25
Zjn_sc00014.1.g09050.1.sm.mkhc	AT5G63120.2	down	139/384(36%)	Others	unclear	1e-61
Zjn_sc00014.1.g09080.1.am.mk	AT5G02230.2	up	45/107(42%)	Others	unclear	2e-14
Zjn_sc00014.1.g09180.1.sm.mkhc	AT4G15940.1	up	104/217(47%)	Others	unclear	3e-47
Zjn_sc00014.1.g09330.1.sm.mk	AT1G14870.1	down	66/118(55%)	Others	unclear	3e-35
Zjn_sc00014.1.g09370.1.am.mk	AT3G51000.1	down	80/196(40%)	Others	unclear	7e-36
Zjn_sc00014.1.g09910.1.sm.mkhc	AT4G13020.4	up	59/82(71%)	Others	unclear	2e-31
Zjn_sc00014.1.g10650.1.am.mk	AT5G60720.1	up	221/659(33%)	Others	unclear	2e-78
Zjn_sc00015.1.g00610.1.sm.mkhc	AT4G39770.1	down	162/221(73%)	Others	unclear	1e-89
Zjn_sc00015.1.g01010.1.sm.mkhc	AT4G23120.1	down	30/91(32%)	Others	unclear	3e-07
Zjn_sc00015.1.g02380.1.am.mk	AT5G57685.1	down	69/128(53%)	Others	unclear	2e-30
Zjn_sc00015.1.g02650.1.sm.mkhc	AT1G28330.4	down	40/135(29%)	Others	unclear	8e-08
Zjn_sc00015.1.g02950.1.sm.mk	AT1G49470.1	up	128/272(47%)	Others	unclear	2e-66
Zjn_sc00015.1.g04420.1.sm.mk	AT3G62420.1	up	39/109(35%)	Others	unclear	3e-14
Zjn_sc00015.1.g04800.1.sm.mkhc	AT1G55760.1	up	128/204(62%)	Others	unclear	1e-72
Zjn_sc00015.1.g05920.1.sm.mkhc	AT3G20250.1	up	319/925(34%)	Others	unclear	1e-117
Zjn_sc00015.1.g07750.1.am.mkhc	AT5G04540.1	up	70/169(41%)	Others	unclear	5e-30
Zjn_sc00016.1.g00060.1.am.mkhc	AT5G63640.1	up	46/139(33%)	Others	unclear	2e-12
Zjn_sc00016.1.g00600.1.sm.mkhc	LOC_Os05g28630.1	up	286/509(56%)	Others	unclear	1e-141
Zjn_sc00016.1.g00740.1.sm.mk	LOC_Os03g60350.1	down	214/354(60%)	Others	unclear	1e-130
Zjn_sc00016.1.g01400.1.sm.mk	AT4G40070.1	up	43/121(35%)	Others	unclear	2e-14
Zjn_sc00016.1.g01700.1.sm.mkhc	AT3G16240.1	up	120/296(40%)	Others	unclear	2e-56
Zjn_sc00016.1.g02120.1.sm.mk	AT3G14770.1	down	60/132(45%)	Others	unclear	4e-24
Zjn_sc00016.1.g04350.1.sm.mkhc	AT5G27150.1	up	223/422(52%)	Others	unclear	1e-109
Zjn_sc00016.1.g05680.1.am.mkhc	AT4G25500.3	down	68/246(27%)	Others	unclear	2e-13
Zjn_sc00016.1.g06210.1.sm.mkhc	AT5G02240.1	down	157/249(63%)	Others	unclear	1e-81
Zjn_sc00016.1.g06250.1.sm.mkhc	AT2G29140.1	down	111/162(68%)	Others	unclear	3e-58
Zjn_sc00017.1.g00900.1.sm.mkhc	AT4G28025.1	down	30/47(63%)	Others	unclear	7e-12
Zjn_sc00017.1.g03890.1.am.mk	AT3G11600.1	down	52/126(41%)	Others	unclear	5e-20
Zjn_sc00017.1.g03970.1.sm.mkhc	AT3G52600.1	up	106/177(59%)	Others	unclear	4e-54
Zjn_sc00017.1.g03980.1.sm.mkhc	AT3G52600.1	up	84/146(57%)	Others	unclear	6e-41
Zjn_sc00017.1.g04150.1.am.mk	AT2G27580.1	up	80/163(49%)	Others	unclear	3e-39
Zjn_sc00017.1.g04970.1.am.mk	AT5G40960.1	down	28/68(41%)	Others	unclear	3e-12
Zjn_sc00017.1.g05040.1.sm.mk	AT5G41620.1	up	83/335(24%)	Others	unclear	5e-21
Zjn_sc00017.1.g06810.1.sm.mk	AT5G60680.1	down	73/175(41%)	Others	unclear	7e-25
Zjn_sc00017.1.g07130.1.sm.mkhc	AT4G00780.1	up	73/285(25%)	Others	unclear	3e-14
Zjn_sc00017.1.g07730.1.sm.mkhc	AT5G62740.1	down	230/283(81%)	Others	unclear	1e-131
Zjn_sc00017.1.g07750.1.sm.mkhc	AT1G07040.1	up	124/202(61%)	Others	unclear	4e-71
Zjn_sc00018.1.g00130.1.am.mk	AT2G42760.1	up	65/184(35%)	Others	unclear	3e-20
Zjn_sc00018.1.g00890.1.sm.mkhc	AT5G41110.1	up	50/101(49%)	Others	unclear	6e-22
Zjn_sc00018.1.g02060.1.sm.mkhc	AT5G47560.1	up	333/526(63%)	Others	unclear	0
Zjn_sc00018.1.g02600.1.sm.mkhc	AT5G66180.3	down	36/102(35%)	Others	unclear	8e-08
Zjn_sc00018.1.g02910.1.am.mk	AT5G64280.1	down	143/227(62%)	Others	unclear	6e-76
Zjn_sc00018.1.g03290.1.sm.mkhc	AT4G27000.1	down	169/345(48%)	Others	unclear	8e-84
Zjn_sc00018.1.g04690.1.sm.mkhc	AT1G28330.4	up	46/141(32%)	Others	unclear	2e-10
Zjn_sc00018.1.g04700.1.am.mk	AT3G43120.1	up	85/159(53%)	Others	unclear	5e-43
Zjn_sc00018.1.g04740.1.am.mk	AT5G47860.1	down	31/81(38%)	Others	unclear	1e-09
Zjn_sc00018.1.g07210.1.am.mk	AT2G25200.1	down	114/413(27%)	Others	unclear	3e-28
Zjn_sc00019.1.g02120.1.am.mk	DQ418880.1	down	177/348(50%)	Others	unclear	9e-94
Zjn_sc00019.1.g04020.1.sm.mkhc	AT1G50010.1	up	166/462(35%)	Others	unclear	8e-83
Zjn_sc00019.1.g04350.1.sm.mk	AT3G63210.1	down	96/315(30%)	Others	unclear	8e-23
Zjn_sc00020.1.g00030.1.sm.mkhc	AT1G14870.1	down	84/139(60%)	Others	unclear	1e-47
Zjn_sc00020.1.g01230.1.am.mk	AT3G24290.1	down	108/425(25%)	Others	unclear	2e-24
Zjn_sc00020.1.g02810.1.am.mk	AT1G27300.1	down	41/122(33%)	Others	unclear	4e-14
Zjn_sc00020.1.g04880.1.sm.mk	AT5G60680.1	down	62/164(37%)	Others	unclear	4e-17
Zjn_sc00020.1.g05050.1.sm.mkhc	AT5G06300.1	#N/A	63/73(86%)	Others	unclear	1e-31
Zjn_sc00020.1.g05690.1.am.mk	AT5G53420.1	up	30/47(63%)	Others	unclear	3e-13
Zjn_sc00021.1.g01480.1.sm.mkhc	AT5G57010.1	down	236/417(56%)	Others	unclear	1e-131
Zjn_sc00022.1.g00260.1.am.mk	AT1G14870.1	up	76/164(46%)	Others	unclear	5e-38
Zjn_sc00022.1.g00900.1.am.mk	AT3G14950.1	up	141/372(37%)	Others	unclear	3e-65
Zjn_sc00022.1.g01070.1.sm.mk	AT3G25230.2	down	39/118(33%)	Others	unclear	9e-11
Zjn_sc00022.1.g01940.1.sm.mk	AT3G54850.1	down	122/403(30%)	Others	unclear	8e-33
Zjn_sc00022.1.g02600.1.am.mk	AT5G55710.1	down	96/190(50%)	Others	unclear	1e-47
Zjn_sc00022.1.g03360.1.sm.mkhc	AT4G02410.1	up	121/414(29%)	Others	unclear	5e-33
Zjn_sc00022.1.g03420.1.sm.mk	AT3G19020.1	up	50/178(28%)	Others	unclear	2e-14
Zjn_sc00022.1.g04610.1.sm.mk	AT5G16840.2	up	139/235(59%)	Others	unclear	8e-71
Zjn_sc00022.1.g05160.1.am.mk	AT4G35480.1	down	75/160(46%)	Others	unclear	5e-34
Zjn_sc00022.1.g05620.1.am.mk	AT4G25490.1	down	78/197(39%)	Others	unclear	6e-24
Zjn_sc00022.1.g05660.1.sm.mkhc	AT1G12640.1	up	325/463(70%)	Others	unclear	0
Zjn_sc00022.1.g06400.1.sm.mkhc	AT4G22590.1	down	214/376(56%)	Others	unclear	1e-109
Zjn_sc00022.1.g06750.1.sm.mk	AT5G61600.1	up	88/215(40%)	Others	unclear	2e-29
Zjn_sc00022.1.g07300.1.am.mk	AT3G49590.3	up	112/331(33%)	Others	unclear	4e-30
Zjn_sc00022.1.g07630.1.sm.mk	AT3G48890.1	down	128/235(54%)	Others	unclear	3e-61
Zjn_sc00022.1.g07890.1.sm.mkhc	AT5G23340.1	down	66/104(63%)	Others	unclear	1e-32
Zjn_sc00022.1.g08010.1.am.mk	AT1G22400.1	down	46/155(29%)	Others	unclear	2e-10
Zjn_sc00023.1.g01400.1.sm.mkhc	AT4G17670.1	down	47/84(55%)	Others	unclear	2e-20
Zjn_sc00023.1.g01430.1.am.mkhc	AT4G17670.1	down	40/86(46%)	Others	unclear	2e-18
Zjn_sc00023.1.g02510.1.sm.mkhc	AT3G26070.1	down	40/168(23%)	Others	unclear	3e-08
Zjn_sc00023.1.g02890.1.am.mk	AT3G23840.1	down	88/267(32%)	Others	unclear	4e-37
Zjn_sc00023.1.g03120.1.sm.mkhc	AT4G19860.1	up	101/161(62%)	Others	unclear	2e-56
Zjn_sc00023.1.g04580.1.am.mk	AT1G80450.1	up	62/169(36%)	Others	unclear	8e-18
Zjn_sc00023.1.g05180.1.am.mk	AT4G01985.1	down	24/45(53%)	Others	unclear	1e-07
Zjn_sc00023.1.g05340.1.am.mk	AT5G18630.1	down	50/193(25%)	Others	unclear	3e-07
Zjn_sc00023.1.g05970.1.am.mkhc	AT5G50100.1	down	97/148(65%)	Others	unclear	1e-56
Zjn_sc00023.1.g06160.1.am.mkhc	AT5G04490.1	down	31/60(51%)	Others	unclear	3e-16
Zjn_sc00023.1.g06690.1.am.mk	AT4G27450.1	up	150/244(61%)	Others	unclear	3e-86
Zjn_sc00024.1.g00910.1.am.mkhc	AT3G05500.1	up	114/220(51%)	Others	unclear	3e-61
Zjn_sc00025.1.g02490.1.sm.mkhc	AT4G05150.1	up	52/130(40%)	Others	unclear	2e-22
Zjn_sc00025.1.g02660.1.sm.mkhc	AT3G19020.1	up	52/182(28%)	Others	unclear	2e-13
Zjn_sc00025.1.g03710.1.sm.mkhc	AT3G54000.1	down	57/144(39%)	Others	unclear	2e-13
Zjn_sc00025.1.g04670.1.sm.mkhc	AT4G33070.1	up	199/259(76%)	Others	unclear	1e-113
Zjn_sc00026.1.g00700.1.sm.mk	AT1G01470.1	down	83/151(54%)	Others	unclear	9e-50
Zjn_sc00026.1.g01330.1.am.mk	AT5G46230.1	down	75/143(52%)	Others	unclear	8e-41
Zjn_sc00026.1.g01930.1.am.mk	AT4G32870.1	down	50/150(33%)	Others	unclear	8e-22
Zjn_sc00027.1.g00060.1.am.mkhc	AT5G53420.1	#N/A	113/257(43%)	Others	unclear	1e-47
Zjn_sc00027.1.g00780.1.sm.mk	AT3G28920.1	down	79/179(44%)	Others	unclear	3e-33
Zjn_sc00027.1.g00850.1.am.mk	AT5G62770.1	down	72/241(29%)	Others	unclear	2e-18
Zjn_sc00027.1.g01160.1.sm.mk	AT5G46230.1	up	54/134(40%)	Others	unclear	4e-27
Zjn_sc00027.1.g02210.1.sm.mkhc	AT4G13400.1	up	75/126(59%)	Others	unclear	2e-39
Zjn_sc00028.1.g03400.1.am.mkhc	AT1G33110.1	#N/A	155/245(63%)	Others	unclear	7e-88
Zjn_sc00028.1.g03920.1.am.mk	AT5G05270.1	down	121/272(44%)	Others	unclear	5e-56
Zjn_sc00028.1.g03930.1.am.mk	AT5G01880.1	down	76/164(46%)	Others	unclear	2e-34
Zjn_sc00029.1.g02250.1.sm.mkhc	AT1G79270.1	up	179/597(29%)	Others	unclear	3e-54
Zjn_sc00029.1.g03470.1.am.mkhc	AT3G14770.1	down	71/127(55%)	Others	unclear	4e-33
Zjn_sc00029.1.g03500.1.sm.mkhc	AT1G19660.1	down	59/138(42%)	Others	unclear	8e-27
Zjn_sc00029.1.g03830.1.am.mkhc	AT5G11950.1	up	144/207(69%)	Others	unclear	5e-79
Zjn_sc00029.1.g04200.1.sm.mk	AT3G54150.1	up	116/263(44%)	Others	unclear	2e-61
Zjn_sc00029.1.g04750.1.sm.mk	AM939937.1	up	46/105(43%)	Others	unclear	1e-14
Zjn_sc00029.1.g06070.1.sm.mkhc	AT4G18780.1	up	607/732(82%)	Others	unclear	0
Zjn_sc00030.1.g00280.1.am.mkhc	AT2G32670.1	down	133/221(60%)	Others	unclear	1e-77
Zjn_sc00030.1.g01420.1.am.mkhc	AT3G03870.2	up	53/151(35%)	Others	unclear	2e-15
Zjn_sc00030.1.g02520.1.am.mk	AT4G32480.1	down	71/239(29%)	Others	unclear	2e-23
Zjn_sc00030.1.g02750.1.sm.mkhc	AT1G71100.1	down	147/242(60%)	Others	unclear	1e-74
Zjn_sc00030.1.g03230.1.am.mk	AT2G27580.1	up	68/166(40%)	Others	unclear	3e-34
Zjn_sc00031.1.g01180.1.am.mk	AT3G13229.1	up	60/198(30%)	Others	unclear	4e-19
Zjn_sc00031.1.g01500.1.am.mk	AT5G57130.1	up	50/103(48%)	Others	unclear	1e-19
Zjn_sc00032.1.g00190.1.sm.mkhc	AT4G03390.1	down	170/528(32%)	Others	unclear	4e-61
Zjn_sc00034.1.g02170.1.sm.mk	AT4G19960.1	up	36/59(61%)	Others	unclear	3e-16
Zjn_sc00034.1.g02420.1.sm.mkhc	AT5G22940.1	up	126/280(45%)	Others	unclear	2e-74
Zjn_sc00034.1.g02430.1.sm.mk	AT5G22940.1	up	146/346(42%)	Others	unclear	1e-81
Zjn_sc00034.1.g02780.1.am.mk	AT1G27290.2	up	44/108(40%)	Others	unclear	8e-14
Zjn_sc00034.1.g02900.1.am.mkhc	AT5G40930.1	down	84/170(49%)	Others	unclear	6e-38
Zjn_sc00034.1.g03750.1.sm.mkhc	AT4G08455.1	down	45/158(28%)	Others	unclear	5e-10
Zjn_sc00034.1.g05900.1.sm.mkhc	AT5G64380.1	down	128/310(41%)	Others	unclear	4e-63
Zjn_sc00034.1.g05990.1.sm.mk	AT5G49690.1	up	103/254(40%)	Others	unclear	2e-47
Zjn_sc00034.1.g06190.1.sm.mk	AT5G24090.1	down	171/277(61%)	Others	unclear	1e-104
Zjn_sc00036.1.g01050.1.sm.mk	AT4G39610.1	up	93/224(41%)	Others	unclear	2e-36
Zjn_sc00036.1.g01240.1.am.mk	AT5G62770.1	down	66/230(28%)	Others	unclear	1e-15
Zjn_sc00036.1.g03190.1.am.mkhc	AT5G11460.1	down	96/280(34%)	Others	unclear	3e-23
Zjn_sc00036.1.g03410.1.am.mk	AT3G54150.1	up	117/245(47%)	Others	unclear	1e-63
Zjn_sc00036.1.g03440.1.am.mkhc	AT5G06300.1	up	124/199(62%)	Others	unclear	2e-62
Zjn_sc00036.1.g03660.1.sm.mk	AT3G19020.1	down	102/400(25%)	Others	unclear	3e-22
Zjn_sc00036.1.g03800.1.sm.mkhc	AT5G57030.1	down	104/187(55%)	Others	unclear	3e-48
Zjn_sc00036.1.g03810.1.sm.mk	AT5G57030.1	down	25/42(59%)	Others	unclear	3e-08
Zjn_sc00037.1.g00700.1.sm.mk	AT4G10850.1	up	115/227(50%)	Others	unclear	1e-57
Zjn_sc00037.1.g02450.1.am.mkhc	AT3G53750.1	down	124/387(32%)	Others	unclear	1e-49
Zjn_sc00037.1.g02830.1.sm.mkhc	AT5G42370.1	down	101/225(44%)	Others	unclear	2e-45
Zjn_sc00037.1.g03710.1.sm.mkhc	AT5G27290.1	down	41/139(29%)	Others	unclear	3e-10
Zjn_sc00037.1.g04460.1.am.mk	AT3G43860.1	up	71/193(36%)	Others	unclear	7e-33
Zjn_sc00037.1.g04470.1.sm.mkhc	AT4G31410.1	up	51/121(42%)	Others	unclear	3e-23
Zjn_sc00037.1.g05010.1.am.mkhc	AT1G23710.1	down	68/258(26%)	Others	unclear	6e-14
Zjn_sc00038.1.g02260.1.am.mk	AT5G46230.1	down	58/134(43%)	Others	unclear	6e-27
Zjn_sc00038.1.g03200.1.sm.mk	AT4G31820.1	down	246/599(41%)	Others	unclear	1e-117
Zjn_sc00038.1.g03550.1.sm.mkhc	AT2G32295.1	up	157/283(55%)	Others	unclear	1e-86
Zjn_sc00039.1.g01380.1.sm.mkhc	AT1G21920.1	up	200/284(70%)	Others	unclear	1e-124
Zjn_sc00039.1.g02630.1.sm.mk	AT3G28180.1	up	406/688(59%)	Others	unclear	0
Zjn_sc00039.1.g03370.1.am.mk	AT3G28920.1	up	111/233(47%)	Others	unclear	5e-51
Zjn_sc00039.1.g04530.1.am.mk	AT2G18650.1	down	121/378(32%)	Others	unclear	1e-38
Zjn_sc00039.1.g04560.1.am.mkhc	AT4G38060.2	up	41/105(39%)	Others	unclear	2e-10
Zjn_sc00040.1.g00300.1.am.mkhc	AT2G18196.1	down	51/147(34%)	Others	unclear	3e-20
Zjn_sc00040.1.g01780.1.am.mk	AT4G21560.1	up	139/215(64%)	Others	unclear	5e-74
Zjn_sc00040.1.g02690.1.am.mkhc	AT3G56620.1	up	178/336(52%)	Others	unclear	3e-95
Zjn_sc00040.1.g02860.1.sm.mkhc	AT5G12200.1	up	388/508(76%)	Others	unclear	0
Zjn_sc00040.1.g03420.1.sm.mk	AT2G38640.1	down	84/210(40%)	Others	unclear	1e-34
Zjn_sc00040.1.g04450.1.am.mk	AT3G55880.2	down	33/76(43%)	Others	unclear	1e-10
Zjn_sc00040.1.g04470.1.am.mk	AT4G27900.1	up	48/139(34%)	Others	unclear	5e-13
Zjn_sc00040.1.g05410.1.am.mkhc	AT5G03260.1	up	203/441(46%)	Others	unclear	1e-106
Zjn_sc00040.1.g05760.1.sm.mk	AT4G00400.1	down	115/204(56%)	Others	unclear	7e-62
Zjn_sc00040.1.g05820.1.am.mk	AT2G40000.1	up	198/437(45%)	Others	unclear	1e-103
Zjn_sc00041.1.g00390.1.sm.mkhc	AT5G42570.1	up	77/135(57%)	Others	unclear	1e-36
Zjn_sc00041.1.g01170.1.am.mkhc	AT5G03610.1	up	86/259(33%)	Others	unclear	1e-35
Zjn_sc00041.1.g02110.1.am.mk	AT4G35480.1	down	69/151(45%)	Others	unclear	1e-30
Zjn_sc00041.1.g02150.1.am.mk	AT5G19900.1	up	100/172(58%)	Others	unclear	3e-48
Zjn_sc00042.1.g00490.1.am.mk	AT5G16360.1	down	41/84(48%)	Others	unclear	2e-15
Zjn_sc00043.1.g01070.1.am.mk	AT3G29075.1	up	45/136(33%)	Others	unclear	2e-12
Zjn_sc00043.1.g01920.1.sm.mk	AT4G31380.1	up	68/124(54%)	Others	unclear	2e-29
Zjn_sc00043.1.g02510.1.sm.mk	AT3G23640.1	up	101/460(21%)	Others	unclear	2e-13
Zjn_sc00044.1.g00120.1.sm.mkhc	AT4G31820.1	up	134/466(28%)	Others	unclear	1e-50
Zjn_sc00044.1.g00450.1.am.mk	AT3G54850.1	down	113/300(37%)	Others	unclear	1e-38
Zjn_sc00044.1.g01960.1.am.mk	AT3G62630.1	up	100/366(27%)	Others	unclear	4e-15
Zjn_sc00044.1.g02310.1.am.mkhc	AT1G36070.2	down	266/411(64%)	Others	unclear	1e-157
Zjn_sc00044.1.g02590.1.sm.mkhc	AT5G39850.1	down	176/197(89%)	Others	unclear	5e-98
Zjn_sc00044.1.g02790.1.am.mk	AT5G39520.1	down	83/184(45%)	Others	unclear	7e-37
Zjn_sc00044.1.g03050.1.am.mkhc	AT2G24040.1	up	29/55(52%)	Others	unclear	6e-12
Zjn_sc00044.1.g04150.1.sm.mk	AT3G46230.1	down	97/147(65%)	Others	unclear	1e-53
Zjn_sc00045.1.g00100.1.sm.mkhc	AT3G58750.1	up	188/334(56%)	Others	unclear	1e-93
Zjn_sc00045.1.g00510.1.am.mk	AT3G62640.1	down	34/106(32%)	Others	unclear	2e-10
Zjn_sc00045.1.g00550.1.sm.mkhc	AT4G29490.1	up	310/482(64%)	Others	unclear	1e-179
Zjn_sc00045.1.g02270.1.sm.mkhc	AT1G44542.1	down	105/220(47%)	Others	unclear	3e-48
Zjn_sc00045.1.g03930.1.am.mk	AT5G57035.1	up	42/94(44%)	Others	unclear	2e-17
Zjn_sc00045.1.g04580.1.sm.mkhc	AT2G21540.3	up	84/120(70%)	Others	unclear	6e-44
Zjn_sc00045.1.g04790.1.sm.mkhc	AT5G53360.1	down	91/137(66%)	Others	unclear	6e-50
Zjn_sc00046.1.g00100.1.sm.mk	AT4G31820.1	down	235/622(37%)	Others	unclear	1e-102
Zjn_sc00046.1.g01210.1.am.mk	AT4G37450.1	up	86/244(35%)	Others	unclear	1e-23
Zjn_sc00046.1.g01490.1.am.mk	AT2G15020.1	down	204/575(35%)	Others	unclear	5e-91
Zjn_sc00047.1.g00080.1.sm.mkhc	AT4G03030.1	up	182/436(41%)	Others	unclear	5e-90
Zjn_sc00047.1.g00160.1.sm.mkhc	AT3G14590.2	up	333/652(51%)	Others	unclear	0
Zjn_sc00047.1.g00400.1.am.mkhc	AT4G10850.1	up	108/187(57%)	Others	unclear	6e-59
Zjn_sc00047.1.g01560.1.am.mk	AT3G29075.1	up	27/92(29%)	Others	unclear	1e-07
Zjn_sc00047.1.g01680.1.sm.mk	AT5G25930.1	down	172/384(44%)	Others	unclear	2e-90
Zjn_sc00047.1.g01760.1.am.mk	AT5G01880.1	up	37/99(37%)	Others	unclear	6e-11
Zjn_sc00047.1.g02310.1.sm.mk	AT5G25930.1	down	42/96(43%)	Others	unclear	3e-17
Zjn_sc00047.1.g03600.1.am.mk	NM_001154582.1	down	102/180(56%)	Others	unclear	4e-40
Zjn_sc00047.1.g03950.1.am.mkhc	AT4G24040.1	up	89/216(41%)	Others	unclear	3e-45
Zjn_sc00048.1.g00580.1.sm.mkhc	AT5G03260.1	up	155/339(45%)	Others	unclear	2e-81
Zjn_sc00048.1.g00750.1.sm.mkhc	AT1G32100.1	down	193/311(62%)	Others	unclear	1e-114
Zjn_sc00049.1.g00160.1.sm.mkhc	AT5G57035.1	up	299/795(37%)	Others	unclear	1e-137
Zjn_sc00049.1.g00260.1.sm.mk	AT4G25100.1	down	75/174(43%)	Others	unclear	5e-39
Zjn_sc00049.1.g00420.1.sm.mk	AT3G15990.1	up	37/72(51%)	Others	unclear	1e-14
Zjn_sc00049.1.g01260.1.sm.mkhc	AT5G25770.3	down	173/317(54%)	Others	unclear	5e-95
Zjn_sc00049.1.g01750.1.sm.mkhc	AT3G49800.1	up	45/147(30%)	Others	unclear	7e-09
Zjn_sc00049.1.g02260.1.sm.mk	AT5G61370.1	down	44/182(24%)	Others	unclear	2e-12
Zjn_sc00049.1.g02460.1.am.mk	AT2G15490.3	down	181/491(36%)	Others	unclear	2e-74
Zjn_sc00049.1.g02660.1.sm.mk	AT3G06440.1	down	50/208(24%)	Others	unclear	1e-09
Zjn_sc00049.1.g02780.1.am.mkhc	AT3G14280.1	down	30/68(44%)	Others	unclear	3e-10
Zjn_sc00049.1.g03490.1.am.mkhc	AT1G44800.1	up	177/357(49%)	Others	unclear	1e-101
Zjn_sc00049.1.g04260.1.sm.mkhc	AT4G17670.1	down	22/46(47%)	Others	unclear	7e-09
Zjn_sc00049.1.g04550.1.am.mk	AT5G03760.1	down	153/390(39%)	Others	unclear	2e-71
Zjn_sc00049.1.g04710.1.sm.mk	AT1G75270.1	down	42/96(43%)	Others	unclear	2e-15
Zjn_sc00050.1.g01410.1.sm.mkhc	AT5G41910.1	down	111/157(70%)	Others	unclear	3e-56
Zjn_sc00050.1.g01840.1.sm.mk	AT4G25490.1	down	38/120(31%)	Others	unclear	4e-08
Zjn_sc00050.1.g01870.1.am.mk	AT4G25490.1	down	90/204(44%)	Others	unclear	8e-36
Zjn_sc00050.1.g02360.1.am.mk	AT5G64550.1	down	205/302(67%)	Others	unclear	1e-129
Zjn_sc00050.1.g03270.1.am.mk	AT3G19020.1	up	86/286(30%)	Others	unclear	4e-24
Zjn_sc00051.1.g00760.1.sm.mkhc	AT1G18170.1	down	52/180(28%)	Others	unclear	9e-14
Zjn_sc00051.1.g01360.1.am.mk	AT3G63210.1	down	52/160(32%)	Others	unclear	1e-07
Zjn_sc00051.1.g01980.1.am.mk	AT4G27000.1	down	77/327(23%)	Others	unclear	1e-13
Zjn_sc00053.1.g00665.1.br	AT3G55880.2	up	33/93(35%)	Others	unclear	9e-10
Zjn_sc00053.1.g01130.1.am.mkhc	AT2G47730.1	up	84/241(34%)	Others	unclear	9e-29
Zjn_sc00053.1.g01880.1.am.mkhc	AT4G25190.2	up	94/310(30%)	Others	unclear	5e-27
Zjn_sc00053.1.g02340.1.sm.mk	AT5G61520.1	up	242/493(49%)	Others	unclear	1e-141
Zjn_sc00056.1.g00310.1.sm.mkhc	AT5G09320.1	down	50/92(54%)	Others	unclear	2e-15
Zjn_sc00056.1.g00620.1.sm.mkhc	AT4G08455.1	down	44/167(26%)	Others	unclear	2e-07
Zjn_sc00056.1.g00920.1.am.mk	AT3G25250.1	up	224/453(49%)	Others	unclear	1e-111
Zjn_sc00056.1.g01620.1.sm.mkhc	AT4G30800.1	down	138/158(87%)	Others	unclear	7e-77
Zjn_sc00056.1.g01850.1.am.mkhc	AT4G28740.1	down	169/274(61%)	Others	unclear	1e-94
Zjn_sc00056.1.g02200.1.sm.mkhc	AT4G21760.1	up	73/197(37%)	Others	unclear	1e-36
Zjn_sc00056.1.g02600.1.sm.mk	AT2G02120.1	down	36/78(46%)	Others	unclear	2e-15
Zjn_sc00056.1.g03240.1.sm.mk	AT4G02410.1	up	178/386(46%)	Others	unclear	1e-90
Zjn_sc00056.1.g03720.1.sm.mk	AT3G15040.1	down	23/28(82%)	Others	unclear	2e-08
Zjn_sc00056.1.g04130.1.sm.mkhc	AT5G47240.1	down	179/277(64%)	Others	unclear	1e-104
Zjn_sc00056.1.g04640.1.sm.mk	AT4G11570.1	down	116/232(50%)	Others	unclear	3e-63
Zjn_sc00057.1.g00220.1.sm.mk	AT5G04360.1	down	60/136(44%)	Others	unclear	1e-20
Zjn_sc00058.1.g00630.1.am.mk	AT5G07430.1	up	142/382(37%)	Others	unclear	1e-65
Zjn_sc00058.1.g01250.1.am.mk	AT4G33565.1	up	76/214(35%)	Others	unclear	6e-29
Zjn_sc00058.1.g01300.1.sm.mkhc	AT4G27000.1	down	96/266(36%)	Others	unclear	1e-34
Zjn_sc00058.1.g01650.1.sm.mk	AT4G10280.1	down	45/104(43%)	Others	unclear	3e-21
Zjn_sc00058.1.g01680.1.sm.mkhc	AT5G49740.1	down	386/751(51%)	Others	unclear	0
Zjn_sc00058.1.g02450.1.sm.mkhc	AT4G06676.2	up	45/107(42%)	Others	unclear	3e-15
Zjn_sc00058.1.g03010.1.am.mk	AT5G10400.1	down	136/136(100%)	Others	unclear	3e-71
Zjn_sc00058.1.g03030.1.am.mk	AT3G19020.1	up	61/198(30%)	Others	unclear	8e-13
Zjn_sc00058.1.g03490.1.sm.mk	AT3G52820.1	up	247/402(61%)	Others	unclear	1e-146
Zjn_sc00059.1.g01430.1.sm.mkhc	AT4G32340.1	up	81/222(36%)	Others	unclear	3e-27
Zjn_sc00060.1.g00740.1.am.mkhc	AT4G21990.1	down	276/349(79%)	Others	unclear	1e-165
Zjn_sc00062.1.g00150.1.sm.mkhc	AT3G57190.1	down	81/147(55%)	Others	unclear	4e-40
Zjn_sc00062.1.g00940.1.sm.mkhc	NM_001157520.1	up	167/193(86%)	Others	unclear	4e-94
Zjn_sc00063.1.g01430.1.am.mkhc	AT3G13772.1	up	199/615(32%)	Others	unclear	1e-103
Zjn_sc00063.1.g01520.1.am.mk	AT5G16910.1	down	446/856(52%)	Others	unclear	0
Zjn_sc00065.1.g01650.1.am.mk	AT3G48880.2	down	61/220(27%)	Others	unclear	7e-18
Zjn_sc00066.1.g01010.1.sm.mk	AT4G27000.1	down	58/220(26%)	Others	unclear	7e-18
Zjn_sc00066.1.g01900.1.am.mk	AT2G15580.1	down	78/226(34%)	Others	unclear	8e-23
Zjn_sc00066.1.g02100.1.am.mkhc	AT3G15352.1	down	46/65(70%)	Others	unclear	3e-24
Zjn_sc00066.1.g02440.1.am.mkhc	AT5G57035.1	down	84/385(21%)	Others	unclear	6e-14
Zjn_sc00066.1.g02600.1.am.mk	AT1G54050.1	down	70/123(56%)	Others	unclear	2e-35
Zjn_sc00066.1.g02790.1.am.mk	AT3G43860.1	up	106/180(58%)	Others	unclear	1e-60
Zjn_sc00066.1.g03070.1.sm.mkhc	AT5G19875.1	up	49/152(32%)	Others	unclear	9e-13
Zjn_sc00066.1.g03140.1.am.mk	AT2G31945.1	up	42/72(58%)	Others	unclear	4e-16
Zjn_sc00066.1.g03160.1.sm.mkhc	LOC_Os06g10560.1	up	175/228(76%)	Others	unclear	1e-109
Zjn_sc00066.1.g03200.1.am.mk	AT3G53990.1	up	77/153(50%)	Others	unclear	8e-43
Zjn_sc00066.1.g03430.1.sm.mkhc	AT3G24740.2	up	122/346(35%)	Others	unclear	7e-48
Zjn_sc00066.1.g03550.1.am.mkhc	AT4G08290.1	up	184/359(51%)	Others	unclear	1e-105
Zjn_sc00067.1.g00880.1.sm.mk	AT3G13229.1	up	63/200(31%)	Others	unclear	7e-19
Zjn_sc00067.1.g01300.1.sm.mk	AT4G01450.2	down	130/351(37%)	Others	unclear	8e-65
Zjn_sc00067.1.g01840.1.am.mk	AT4G25490.1	down	62/139(44%)	Others	unclear	7e-26
Zjn_sc00067.1.g02230.1.sm.mk	AT4G34710.1	up	444/705(62%)	Others	unclear	0
Zjn_sc00068.1.g00190.1.sm.mkhc	AT4G03390.1	up	34/69(49%)	Others	unclear	2e-16
Zjn_sc00068.1.g00230.1.am.mkhc	AT5G11730.1	up	59/162(36%)	Others	unclear	9e-20
Zjn_sc00068.1.g00270.1.sm.mkhc	AT3G62420.1	down	29/74(39%)	Others	unclear	8e-11
Zjn_sc00068.1.g01410.1.sm.mkhc	AT5G04220.1	up	182/313(58%)	Others	unclear	1e-106
Zjn_sc00068.1.g01660.1.sm.mk	AT1G20190.1	up	51/154(33%)	Others	unclear	5e-08
Zjn_sc00068.1.g01880.1.am.mkhc	AT5G10650.2	up	116/373(31%)	Others	unclear	1e-34
Zjn_sc00068.1.g02080.1.sm.mk	AT4G31540.1	up	353/669(52%)	Others	unclear	0
Zjn_sc00068.1.g02330.1.am.mkhc	AT4G30110.1	up	243/421(57%)	Others	unclear	1e-136
Zjn_sc00068.1.g03000.1.am.mkhc	AT3G51090.1	up	63/85(74%)	Others	unclear	1e-29
Zjn_sc00068.1.g03110.1.sm.mk	AT5G47960.1	up	116/211(54%)	Others	unclear	1e-54
Zjn_sc00068.1.g03300.1.am.mk	AT5G03260.1	up	244/573(42%)	Others	unclear	1e-126
Zjn_sc00069.1.g00420.1.sm.mk	AT4G30190.1	up	407/545(74%)	Others	unclear	0
Zjn_sc00069.1.g00910.1.am.mkhc	AT5G48657.2	up	61/246(24%)	Others	unclear	1e-08
Zjn_sc00069.1.g01020.1.am.mkhc	AT3G56200.1	down	174/430(40%)	Others	unclear	5e-86
Zjn_sc00069.1.g02280.1.sm.mkhc	AT4G32440.3	up	62/148(41%)	Others	unclear	2e-28
Zjn_sc00069.1.g02970.1.am.mk	AT5G56870.1	up	435/730(59%)	Others	unclear	0
Zjn_sc00069.1.g03130.1.sm.mk	AT4G26130.1	down	80/296(27%)	Others	unclear	2e-18
Zjn_sc00071.1.g00640.1.am.mk	AT3G43860.1	down	75/180(41%)	Others	unclear	6e-34
Zjn_sc00071.1.g01230.1.am.mkhc	AT5G08560.2	up	84/149(56%)	Others	unclear	3e-41
Zjn_sc00071.1.g01260.1.sm.mkhc	AT4G20380.1	up	63/159(39%)	Others	unclear	9e-26
Zjn_sc00071.1.g01320.1.am.mkhc	AT4G19010.1	down	45/148(30%)	Others	unclear	9e-15
Zjn_sc00072.1.g00210.1.am.mk	AT4G19030.1	up	147/237(62%)	Others	unclear	2e-87
Zjn_sc00074.1.g00020.1.am.mkhc	AT5G19440.1	up	148/320(46%)	Others	unclear	3e-81
Zjn_sc00075.1.g00110.1.sm.mk	AT5G14280.1	up	133/240(55%)	Others	unclear	3e-71
Zjn_sc00078.1.g00820.1.am.mk	AT4G31540.1	up	150/644(23%)	Others	unclear	5e-38
Zjn_sc00078.1.g01350.1.sm.mkhc	AT1G25520.1	up	90/221(40%)	Others	unclear	4e-37
Zjn_sc00078.1.g02830.1.sm.mk	AT3G26590.1	down	209/392(53%)	Others	unclear	1e-121
Zjn_sc00080.1.g00150.1.am.mkhc	AT5G45160.1	down	265/586(45%)	Others	unclear	1e-130
Zjn_sc00080.1.g00870.1.sm.mk	AT4G33565.1	down	68/185(36%)	Others	unclear	1e-23
Zjn_sc00080.1.g01120.1.am.mk	AT1G32120.1	up	85/149(57%)	Others	unclear	1e-44
Zjn_sc00080.1.g01270.1.am.mk	AT5G54860.1	down	34/86(39%)	Others	unclear	1e-09
Zjn_sc00084.1.g00260.1.am.mkhc	AT5G03650.1	down	144/328(43%)	Others	unclear	2e-85
Zjn_sc00084.1.g00510.1.sm.mk	AT4G18425.1	up	91/199(45%)	Others	unclear	1e-47
Zjn_sc00085.1.g00320.1.am.mkhc	AT3G25610.1	up	84/143(58%)	Others	unclear	2e-39
Zjn_sc00085.1.g01150.1.am.mk	AT4G12070.1	down	163/260(62%)	Others	unclear	8e-88
Zjn_sc00086.1.g02280.1.am.mkhc	AT3G56200.1	up	93/195(47%)	Others	unclear	3e-48
Zjn_sc00086.1.g02590.1.am.mkhc	AT1G15690.1	down	670/770(87%)	Others	unclear	0
Zjn_sc00086.1.g02760.1.am.mk	AT5G19440.1	up	121/319(37%)	Others	unclear	3e-51
Zjn_sc00087.1.g00120.1.am.mk	AT5G06560.1	down	127/440(28%)	Others	unclear	3e-31
Zjn_sc00087.1.g01460.1.sm.mk	AT1G01830.3	up	126/472(26%)	Others	unclear	3e-28
Zjn_sc00088.1.g01790.1.sm.mkhc	AT3G63280.2	up	340/626(54%)	Others	unclear	1e-167
Zjn_sc00089.1.g00020.1.am.mkhc	AT5G64070.1	up	39/131(29%)	Others	unclear	5e-13
Zjn_sc00089.1.g00310.1.am.mk	AT5G57685.1	up	49/96(51%)	Others	unclear	3e-20
Zjn_sc00090.1.g00530.1.am.mk	AT5G41080.1	down	189/408(46%)	Others	unclear	5e-86
Zjn_sc00090.1.g00950.1.am.mk	AT2G15490.1	up	74/287(25%)	Others	unclear	9e-22
Zjn_sc00090.1.g00960.1.sm.mk	AT5G41620.1	up	131/487(26%)	Others	unclear	2e-33
Zjn_sc00091.1.g00260.1.sm.mkhc	AT4G39770.1	down	208/318(65%)	Others	unclear	1e-118
Zjn_sc00091.1.g00330.1.am.mk	AT4G17670.1	down	33/94(35%)	Others	unclear	2e-08
Zjn_sc00091.1.g01440.1.am.mkhc	AT1G18720.1	down	81/208(38%)	Others	unclear	4e-36
Zjn_sc00091.1.g01520.1.sm.mkhc	AT5G03760.1	down	101/175(57%)	Others	unclear	3e-55
Zjn_sc00092.1.g00020.1.sm.mkhc	AT4G17615.1	up	44/76(57%)	Others	unclear	6e-19
Zjn_sc00092.1.g00860.1.am.mkhc	NM_001157013.1	up	110/171(64%)	Others	unclear	9e-49
Zjn_sc00092.1.g01050.1.sm.mkhc	AT3G56310.2	down	183/381(48%)	Others	unclear	1e-91
Zjn_sc00092.1.g01280.1.am.mkhc	AT3G51000.1	down	101/316(31%)	Others	unclear	4e-45
Zjn_sc00094.1.g00040.1.am.mk	AT1G04350.1	up	126/268(47%)	Others	unclear	1e-55
Zjn_sc00096.1.g00220.1.sm.mkhc	AT2G29050.1	up	53/90(58%)	Others	unclear	1e-25
Zjn_sc00096.1.g00560.1.am.mk	AT3G62630.1	down	148/388(38%)	Others	unclear	4e-47
Zjn_sc00096.1.g00870.1.am.mkhc	AT5G18630.1	up	35/97(36%)	Others	unclear	1e-10
Zjn_sc00096.1.g00980.1.sm.mkhc	AT5G27150.1	down	169/257(65%)	Others	unclear	8e-89
Zjn_sc00096.1.g01690.1.am.mk	AT4G33565.1	down	77/218(35%)	Others	unclear	6e-26
Zjn_sc00096.1.g01880.1.am.mk	AT5G24090.1	up	97/297(32%)	Others	unclear	2e-41
Zjn_sc00103.1.g00430.1.sm.mkhc	AT1G66670.1	down	64/174(36%)	Others	unclear	3e-28
Zjn_sc00105.1.g00240.1.am.mk	AT3G51000.1	down	170/304(55%)	Others	unclear	1e-100
Zjn_sc00105.1.g00500.1.am.mk	AT5G17230.1	down	257/368(69%)	Others	unclear	1e-144
Zjn_sc00106.1.g00350.1.sm.mkhc	AT5G38860.1	up	101/277(36%)	Others	unclear	4e-31
Zjn_sc00106.1.g00730.1.sm.mk	AT1G01240.1	up	46/182(25%)	Others	unclear	3e-08
Zjn_sc00106.1.g01780.1.sm.mkhc	AT5G06230.1	down	69/175(39%)	Others	unclear	8e-25
Zjn_sc00109.1.g00965.1.br	AT4G20860.1	up	233/520(44%)	Others	unclear	1e-126
Zjn_sc00113.1.g00350.1.am.mk	AT5G18630.1	down	68/231(29%)	Others	unclear	7e-13
Zjn_sc00113.1.g00500.1.sm.mkhc	AT5G64280.1	down	207/539(38%)	Others	unclear	7e-88
Zjn_sc00113.1.g00600.1.sm.mk	AT5G18980.1	up	391/850(46%)	Others	unclear	0
Zjn_sc00115.1.g00030.1.am.mkhc	AT3G25610.1	up	788/1201(65%)	Others	unclear	0
Zjn_sc00120.1.g00460.1.am.mkhc	AT5G01750.2	up	102/203(50%)	Others	unclear	4e-56
Zjn_sc00122.1.g01260.1.am.mk	AT4G25490.1	down	68/204(33%)	Others	unclear	7e-17
Zjn_sc00124.1.g00130.1.am.mkhc	AT4G13160.1	up	73/222(32%)	Others	unclear	9e-24
Zjn_sc00128.1.g00030.1.sm.mkhc	AT5G62570.1	down	84/234(35%)	Others	unclear	2e-32
Zjn_sc00130.1.g00030.1.sm.mk	AT4G36720.1	down	27/81(33%)	Others	unclear	5e-13
Zjn_sc00131.1.g00220.1.am.mk	AT3G43860.1	down	78/201(38%)	Others	unclear	6e-34
Zjn_sc00131.1.g00890.1.sm.mk	XM_002467167.1	up	217/415(52%)	Others	unclear	1e-119
Zjn_sc00131.1.g01000.1.am.mkhc	AT3G56200.1	up	57/122(46%)	Others	unclear	1e-26
Zjn_sc00132.1.g00750.1.sm.mkhc	AT5G19440.1	down	153/320(47%)	Others	unclear	1e-81
Zjn_sc00132.1.g01040.1.am.mk	AT5G57510.1	up	52/150(34%)	Others	unclear	3e-12
Zjn_sc00133.1.g00150.1.sm.mkhc	AT5G41800.1	up	306/444(68%)	Others	unclear	1e-176
Zjn_sc00133.1.g00910.1.am.mk	AT5G62770.1	up	74/250(29%)	Others	unclear	2e-19
Zjn_sc00134.1.g00260.1.sm.mk	AT4G31330.1	up	74/243(30%)	Others	unclear	7e-23
Zjn_sc00135.1.g00380.1.sm.mk	AT4G03390.1	up	133/308(43%)	Others	unclear	2e-64
Zjn_sc00135.1.g00760.1.am.mk	AT5G17230.1	up	232/336(69%)	Others	unclear	1e-131
Zjn_sc00136.1.g00070.1.sm.mkhc	AT4G34830.1	down	183/326(56%)	Others	unclear	1e-100
Zjn_sc00138.1.g00390.1.sm.mk	AT5G18980.1	up	378/790(47%)	Others	unclear	0
Zjn_sc00141.1.g00360.1.sm.mkhc	AT2G28840.2	up	60/173(34%)	Others	unclear	2e-15
Zjn_sc00141.1.g00610.1.sm.mk	AT2G20830.2	down	156/291(53%)	Others	unclear	2e-87
Zjn_sc00141.1.g00630.1.am.mkhc	AT4G19040.2	up	142/310(45%)	Others	unclear	1e-64
Zjn_sc00142.1.g00580.1.sm.mk	AT3G25740.1	down	136/231(58%)	Others	unclear	7e-73
Zjn_sc00143.1.g00050.1.am.mk	AT5G14940.1	up	259/538(48%)	Others	unclear	1e-132
Zjn_sc00143.1.g00910.1.am.mk	AT5G11460.1	down	28/63(44%)	Others	unclear	1e-09
Zjn_sc00147.1.g00870.1.sm.mkhc	AT4G16210.1	down	68/193(35%)	Others	unclear	2e-21
Zjn_sc00149.1.g00030.1.sm.mkhc	AT5G64740.1	down	351/458(76%)	Others	unclear	0
Zjn_sc00150.1.g00580.1.am.mkhc	AT4G24310.1	up	116/210(55%)	Others	unclear	3e-59
Zjn_sc00152.1.g00640.1.am.mk	AT4G35790.2	up	460/912(50%)	Others	unclear	0
Zjn_sc00153.1.g00020.1.am.mk	AT1G36070.1	down	155/257(60%)	Others	unclear	4e-96
Zjn_sc00153.1.g00060.1.sm.mkhc	AT4G39770.1	up	196/314(62%)	Others	unclear	1e-109
Zjn_sc00155.1.g00410.1.am.mk	AT1G18740.1	down	133/409(32%)	Others	unclear	3e-43
Zjn_sc00156.1.g00310.1.am.mkhc	AJ549119.1	down	123/151(81%)	Others	unclear	2e-71
Zjn_sc00165.1.g00070.1.am.mk	AT5G19900.1	up	130/271(47%)	Others	unclear	8e-55
Zjn_sc00167.1.g00260.1.sm.mkhc	AT1G33110.1	down	228/346(65%)	Others	unclear	1e-129
Zjn_sc00167.1.g00420.1.sm.mk	AT5G04200.1	up	185/334(55%)	Others	unclear	1e-90
Zjn_sc00174.1.g00010.1.sm.mk	AT5G01830.1	up	206/612(33%)	Others	unclear	2e-84
Zjn_sc00177.1.g00050.1.es.mkhc	AT1G22460.1	down	53/113(46%)	Others	unclear	2e-25
Zjn_sc00177.1.g00390.1.sm.mkhc	AT4G35790.1	up	182/314(57%)	Others	unclear	1e-102
Zjn_sc00179.1.g00270.1.am.mk	AT2G28500.1	up	76/146(52%)	Others	unclear	1e-31
Zjn_sc00182.1.g00180.1.sm.mkhc	AT5G03610.1	down	85/259(32%)	Others	unclear	4e-36
Zjn_sc00184.1.g00300.1.sm.mk	AT2G33250.1	down	71/251(28%)	Others	unclear	8e-20
Zjn_sc00204.1.g00120.1.am.mk	AT5G49630.1	up	309/502(61%)	Others	unclear	1e-179
Zjn_sc00209.1.g00120.1.sm.mkhc	AT1G75270.1	down	114/164(69%)	Others	unclear	2e-62
Zjn_sc00210.1.g00040.1.am.mk	AT4G29820.1	down	128/244(52%)	Others	unclear	1e-63
Zjn_sc00225.1.g00210.1.sm.mkhc	AT5G58170.1	down	56/136(41%)	Others	unclear	7e-24
Zjn_sc00225.1.g00240.1.sm.mkhc	AT5G47560.1	down	154/252(61%)	Others	unclear	1e-87
Zjn_sc00233.1.g00100.1.am.mk	AT2G35910.1	up	73/165(44%)	Others	unclear	9e-38
Zjn_sc00257.1.g00020.1.sm.mkhc	AT1G36070.1	down	239/397(60%)	Others	unclear	1e-147
Zjn_sc00563.1.g00010.1.am.mkhc	AT4G23190.1	down	131/445(29%)	Others	unclear	1e-45
Zjn_sc00795.1.g00010.1.sm.mk	AT4G02410.1	down	114/184(61%)	Others	unclear	1e-59
Zjn_sc01032.1.g00010.1.sm.mkhc	AT4G05590.1	down	57/69(82%)	Others	unclear	1e-31
Zjn_sc01504.1.g00020.1.am.mk	AT3G46230.1	up	28/102(27%)	Others	unclear	8e-09
Zjn_sc02426.1.g00010.1.am.mkhc	AT5G54980.1	down	49/156(31%)	Others	unclear	2e-21
Zjn_sc02921.1.g00010.1.am.mk	AT5G04200.1	up	71/141(50%)	Others	unclear	2e-29
Zjn_sc03467.1.g00010.1.am.mk	AT4G33070.1	up	182/215(84%)	Others	unclear	1e-106
Zjn_sc04592.1.g00010.1.am.mk	AT1G03050.1	up	173/476(36%)	Others	unclear	3e-72
Zjn_sc05749.1.g00010.1.am.mk	AT5G04200.1	up	105/169(62%)	Others	unclear	5e-53
Zjn_sc00060.1.g01700.1.am.mkhc	AT1G70980.1	down	99/148(66%)	Others( translation)	unclear	3e-55
Zjn_sc00003.1.g07770.1.am.mk	AT1G78130.1	up	239/446(53%)	Others( transport)	unclear	1e-134
Zjn_sc00007.1.g00300.1.am.mk	AT1G80310.1	down	236/417(56%)	Others( transport)	unclear	1e-127
Zjn_sc00008.1.g02680.1.sm.mkhc	AT1G80830.1	up	48/117(41%)	Others( transport)	unclear	2e-19
Zjn_sc00043.1.g01450.1.sm.mkhc	AT1G71480.1	down	72/114(63%)	Others( transport)	unclear	1e-36
Zjn_sc00045.1.g00930.1.sm.mkhc	AT1G80300.1	down	406/537(75%)	Others( transport)	unclear	0
Zjn_sc00086.1.g01360.1.sm.mkhc	AT1G80300.1	up	400/525(76%)	Others( transport)	unclear	0
Zjn_sc00027.1.g02810.1.sm.mkhc	AT1G64970.1	down	38/125(30%)	Others( vitamin E biosynthesis)	unclear	2e-12
Zjn_sc00014.1.g06340.1.am.mkhc	AT2G31200.1	up	93/125(74%)	Others(ACTIN)	unclear	5e-51
Zjn_sc00047.1.g02900.1.sm.mkhc	AT2G23810.1	down	101/264(38%)	Others(Ageing)	unclear	2e-57
Zjn_sc00022.1.g02190.1.sm.mkhc	AT1G70680.1	up	94/168(55%)	Others(calcium ion binding)	unclear	6e-50
Zjn_sc00131.1.g00380.1.am.mkhc	AT1G70680.1	up	113/173(65%)	Others(calcium ion binding)	unclear	4e-60
Zjn_sc00007.1.g01030.1.sm.mkhc	AT1G77120.1	down	226/376(60%)	Others(defense)	unclear	1e-136
Zjn_sc00017.1.g05430.1.sm.mkhc	AT1G29690.1	up	95/242(39%)	Others(Defense)	unclear	5e-38
Zjn_sc00066.1.g00980.1.am.mkhc	AT1G77120.1	up	224/367(61%)	Others(defense)	unclear	1e-134
Zjn_sc00097.1.g00250.1.am.mk	AT2G15570.2	down	49/107(45%)	Others(enzyme activator)	unclear	3e-27
Zjn_sc00056.1.g00320.1.sm.mkhc	AT1G70590.1	up	33/79(41%)	Others(F-box)	unclear	1e-14
Zjn_sc00014.1.g01210.1.sm.mk	AT2G32150.1	up	120/267(44%)	Others(hydrolase)	unclear	3e-56
Zjn_sc00049.1.g03330.1.am.mkhc	AT1G60440.1	up	118/234(50%)	Others(pantothenate kinase activity)	unclear	1e-57
Zjn_sc00037.1.g03230.1.am.mkhc	AT1G65060.1	up	232/393(59%)	Others(phenylpropanoid metabolism)	unclear	1e-136
Zjn_sc00045.1.g02850.1.sm.mkhc	AT1G65060.1	up	326/532(61%)	Others(phenylpropanoid metabolism)	unclear	0
PB.6912	AT1G70580.2	down	18/31(58%)	Others(photorespiration)	unclear	6e-07
Zjn_sc00022.1.g02240.1.sm.mkhc	AT1G64810.2	down	170/365(46%)	Others(photosynthesis)	unclear	1e-95
Zjn_sc00004.1.g13940.1.am.mk	AT2G32070.1	down	94/249(37%)	Others(RNA modification)	unclear	2e-40
Zjn_sc00007.1.g02020.1.sm.mk	AT2G32070.1	down	187/269(69%)	Others(RNA modification)	unclear	1e-114
Zjn_sc00023.1.g06920.1.am.mk	AT2G32070.1	down	103/266(38%)	Others(RNA modification)	unclear	4e-47
Zjn_sc00003.1.g00440.1.am.mk	AT1G74000.1	up	119/336(35%)	Others(strictosidine synthase )	unclear	7e-43
Zjn_sc00039.1.g04630.1.am.mk	AT1G74000.1	down	130/339(38%)	Others(strictosidine synthase )	unclear	4e-55
Zjn_sc00007.1.g02380.1.sm.mkhc	AT1G23870.1	up	492/870(56%)	Others(transferase activity)	unclear	0
Zjn_sc00018.1.g06240.1.sm.mkhc	AT1G23870.1	up	86/205(41%)	Others(transferase activity)	unclear	3e-43
Zjn_sc00027.1.g04400.1.am.mkhc	AT1G23870.1	down	109/285(38%)	Others(transferase activity)	unclear	1e-49
Zjn_sc00039.1.g04040.1.sm.mkhc	AT1G23870.1	up	261/415(62%)	Others(transferase activity)	unclear	1e-161
Zjn_sc00039.1.g04050.1.sm.mk	AT1G23870.1	up	235/424(55%)	Others(transferase activity)	unclear	1e-131
Zjn_sc00066.1.g02300.1.sm.mkhc	AT1G23870.1	up	460/795(57%)	Others(transferase activity)	unclear	0
Zjn_sc00012.1.g09960.1.sm.mkhc	AT3G01170.1	up	73/218(33%)	Others(translation)	unclear	8e-23
PB.2373	AT2G02040.1	down	238/557(42%)	Others(transport)	unclear	1e-122
Zjn_sc00001.1.g04300.1.sm.mkhc	AT2G02040.1	up	74/162(45%)	Others(transport)	unclear	9e-35
Zjn_sc00007.1.g08010.1.sm.mk	AT2G02040.1	up	252/530(47%)	Others(transport)	unclear	1e-140
Zjn_sc00012.1.g04100.1.am.mk	AT2G02040.1	down	235/569(41%)	Others(transport)	unclear	1e-126
Zjn_sc00014.1.g02350.1.sm.mkhc	AT2G02040.1	up	74/99(74%)	Others(transport)	unclear	5e-40
Zjn_sc00015.1.g03840.1.sm.mk	AT2G22500.1	down	221/323(68%)	Others(transport)	unclear	1e-117
Zjn_sc00064.1.g00820.1.sm.mkhc	AT2G02040.1	up	233/547(42%)	Others(transport)	unclear	1e-132
Zjn_sc00176.1.g00170.1.am.mk	AT2G02040.1	down	257/523(49%)	Others(transport)	unclear	1e-151
Zjn_sc00229.1.g00030.1.am.mk	AT2G04032.1	up	202/379(53%)	Others(transport)	unclear	1e-102
Zjn_sc01431.1.g00010.1.am.mk	AT1G17145.1	up	75/192(39%)	Others(zinc ion binding)	unclear	6e-28
Zjn_sc00071.1.g00380.1.sm.mkhc	AT2G39270.1	down	62/189(32%)	Others:adenylate kinase	unclear	5e-22
Zjn_sc00089.1.g01310.1.sm.mkhc	AT2G39270.1	down	39/131(29%)	Others:adenylate kinase	unclear	1e-09
Zjn_sc00016.1.g00120.1.am.mk	AT3G10985.1	down	51/111(45%)	Others:aging	unclear	1e-19
Zjn_sc00001.1.g03830.1.sm.mkhc	AT3G51440.1	down	106/311(34%)	Others:Alkaloid biosynthesis	unclear	9e-41
Zjn_sc00002.1.g01600.1.am.mk	AT1G74020.1	up	123/309(39%)	Others:Alkaloid biosynthesis	unclear	4e-46
Zjn_sc00002.1.g05970.1.sm.mkhc	AT2G39480.1	up	117/184(63%)	Others:ATPase	unclear	7e-57
Zjn_sc00004.1.g06600.1.sm.mkhc	AT2G44990.1	up	187/386(48%)	Others:carotenoid cleavage dioxygenases	unclear	1e-108
Zjn_sc00002.1.g00280.1.sm.mkhc	AT3G55430.1	up	58/228(25%)	Others:Cell wall	Unclear	3e-14
Zjn_sc00009.1.g08830.1.am.mk	AT4G27830.1	down	60/87(68%)	Others:Cell wall	Unclear	7e-34
Zjn_sc00015.1.g02290.1.am.mk	AT2G36120.1	down	74/175(42%)	Others:cotyledon vascular tissue pattern formation	unclear	1e-33
Zjn_sc00028.1.g02740.1.am.mk	AT2G36120.1	up	91/221(41%)	Others:cotyledon vascular tissue pattern formation	unclear	1e-27
Zjn_sc00146.1.g00400.1.am.mkhc	AT2G36120.1	down	30/65(46%)	Others:cotyledon vascular tissue pattern formation	unclear	4e-07
Zjn_sc00018.1.g05620.1.am.mkhc	AT1G18870.2	down	95/155(61%)	Others:Defence related	unclear	1e-50
Zjn_sc00039.1.g05120.1.sm.mkhc	AT1G18870.2	down	234/509(45%)	Others:Defence related	unclear	1e-112
Zjn_sc00043.1.g01490.1.am.mk	AT1G78780.2	up	109/222(49%)	Others:Defence related	unclear	7e-57
Zjn_sc00001.1.g01990.1.sm.mkhc	AT3G60130.1	down	231/474(48%)	Others:defense	unclear	1e-124
Zjn_sc00004.1.g12110.1.am.mkhc	AT4G30210.2	up	412/667(61%)	Others:defense	Unclear	0
Zjn_sc00008.1.g01470.1.sm.mkhc	AT3G51660.1	down	40/135(29%)	Others:defense	unclear	2e-11
Zjn_sc00032.1.g01420.1.sm.mkhc	AT3G60130.1	up	224/502(44%)	Others:defense	unclear	1e-116
Zjn_sc00149.1.g00080.1.sm.mk	AT2G35980.1	down	56/196(28%)	Others:Defense	unclear	3e-07
Zjn_sc00004.1.g13980.1.sm.mk	AT3G11660.1	up	88/218(40%)	Others:defense response to virus	unclear	7e-43
Zjn_sc00031.1.g01540.1.am.mk	AT3G11660.1	down	88/213(41%)	Others:defense response to virus	unclear	3e-48
Zjn_sc00067.1.g01210.1.am.mk	AT3G11660.1	down	89/219(40%)	Others:defense response to virus	unclear	2e-46
Zjn_sc00005.1.g05860.1.sm.mkhc	AT3G09390.1	down	48/80(60%)	Others:Detoxification	Unclear	5e-27
Zjn_sc00032.1.g01900.1.sm.mkhc	AT4G12290.1	down	305/402(75%)	Others:Detoxification	Unclear	0
Zjn_sc00131.1.g00390.1.sm.mk	AT2G25450.1	up	138/358(38%)	Others:Detoxification	Unclear	3e-65
Zjn_sc00292.1.g00040.1.am.mk	AT3G09390.1	up	23/61(37%)	Others:Detoxification	Unclear	3e-07
Zjn_sc00004.1.g04830.1.sm.mkhc	AT3G07565.1	down	30/104(28%)	Others:DNA binding	unclear	1e-09
Zjn_sc00040.1.g04760.1.am.mk	AT3G09480.1	up	107/139(76%)	Others:DNA binding	unclear	7e-52
Zjn_sc00056.1.g02680.1.sm.mk	AT3G07565.1	down	43/118(36%)	Others:DNA binding	unclear	4e-15
PB.4217	LOC_Os04g16740.1	down	499/507(98%)	Others:Energe	Unclear	0
Zjn_sc00013.1.g04030.1.sm.mkhc	LOC_Os03g53230.1	up	415/486(85%)	Others:Energe	Unclear	0
Zjn_sc00014.1.g03810.1.sm.mkhc	LOC_Os03g53230.1	down	324/346(93%)	Others:Energe	Unclear	0
Zjn_sc00004.1.g03470.1.sm.mkhc	LOC_Os07g15770.1	down	40/70(57%)	Others:Flower development	Unclear	2e-15
Zjn_sc00053.1.g02180.1.am.mk	LOC_Os07g15770.1	down	131/301(43%)	Others:Flower development	Unclear	1e-46
Zjn_sc00059.1.g00100.1.sm.mk	LOC_Os07g15770.1	down	130/304(42%)	Others:Flower development	Unclear	2e-45
Zjn_sc00086.1.g03030.1.am.mk	LOC_Os07g15770.1	down	54/121(44%)	Others:Flower development	Unclear	3e-16
Zjn_sc00093.1.g01620.1.sm.mkhc	LOC_Os07g15770.1	up	41/113(36%)	Others:Flower development	Unclear	3e-10
Zjn_sc00048.1.g00570.1.sm.mkhc	AT2G38080.1	up	80/155(51%)	Others:laccase activity	unclear	2e-45
Zjn_sc00138.1.g00080.1.am.mk	AT4G03280.1	down	159/249(63%)	Others:Light signal	Unclear	3e-81
Zjn_sc00003.1.g06890.1.sm.mkhc	AT3G17790.1	up	74/128(57%)	Others:Metabolism	Unclear	2e-42
Zjn_sc00008.1.g07545.1.br	AT1G30700.1	up	229/530(43%)	Others:Metabolism	Unclear	1e-126
Zjn_sc00022.1.g07760.1.am.mk	AT5G08410.1	down	62/154(40%)	Others:Metabolism	Unclear	3e-28
Zjn_sc00056.1.g02810.1.sm.mk	AT3G44300.1	up	186/332(56%)	Others:Metabolism	Unclear	1e-105
Zjn_sc00094.1.g00960.1.am.mk	AT3G17790.1	down	181/328(55%)	Others:Metabolism	Unclear	1e-105
Zjn_sc00034.1.g02000.1.sm.mkhc	AT2G36950.1	down	72/309(23%)	Others:Metal binding	unclear	1e-12
Zjn_sc00008.1.g09610.1.sm.mk	AT5G44610.1	up	49/144(34%)	Others:Microtubule-associated protein	unclear	2e-07
Zjn_sc00018.1.g02110.1.am.mkhc	AT5G44610.1	up	56/155(36%)	Others:Microtubule-associated protein	unclear	1e-10
Zjn_sc00050.1.g01560.1.sm.mkhc	AB026439.2	down	47/143(32%)	Others:nitrate reductase	Unclear	7e-12
Zjn_sc00001.1.g09580.1.sm.mkhc	LOC_Os07g30970.1	down	140/149(93%)	Others:Pathogenicity and stress	Unclear	2e-82
Zjn_sc00059.1.g00420.1.am.mk	LOC_Os07g30970.1	down	120/169(71%)	Others:Pathogenicity and stress	Unclear	5e-67
Zjn_sc00044.1.g01410.1.sm.mk	AT2G36710.1	up	132/283(46%)	Others:pectinesterase	unclear	7e-68
Zjn_sc00005.1.g05360.1.sm.mkhc	AT2G37150.1	up	107/408(26%)	Others:protein binding	unclear	1e-15
Zjn_sc00029.1.g02970.1.sm.mkhc	AT2G37150.1	down	53/100(53%)	Others:protein binding	unclear	1e-25
Zjn_sc00002.1.g04650.1.sm.mkhc	LOC_Os01g08270.1	down	86/353(24%)	Others:Protein biosynthesis	Unclear	5e-14
Zjn_sc00003.1.g04600.1.am.mkhc	LOC_Os08g04440.1	down	52/92(56%)	Others:Protein biosynthesis	Unclear	1e-25
Zjn_sc00007.1.g00490.1.sm.mkhc	LOC_Os05g45270.1	down	41/166(24%)	Others:Protein biosynthesis	Unclear	4e-07
Zjn_sc00092.1.g02130.1.sm.mkhc	LOC_Os09g23730.1	up	48/129(37%)	Others:Protein biosynthesis	Unclear	1e-07
Zjn_sc00056.1.g00330.1.sm.mkhc	AT2G42490.1	up	379/571(66%)	Others:quinone binding	unclear	0
Zjn_sc00016.1.g05650.1.sm.mkhc	LOC_Os05g02780.1	up	93/104(89%)	Others:Regulatory genes	Unclear	9e-56
Zjn_sc00069.1.g01370.1.sm.mkhc	AT1G09500.3	up	90/234(38%)	Others:secondary metabolites	Unclear	5e-36
Zjn_sc00002.1.g08780.1.sm.mkhc	AT3G07590.1	down	38/116(32%)	Others:snRNP	Unclear	2e-09
Zjn_sc00017.1.g01980.1.am.mkhc	AT3G07590.1	down	105/114(92%)	Others:snRNP	Unclear	4e-58
Zjn_sc00053.1.g03040.1.am.mk	LOC_Os10g41930.1	up	203/244(83%)	Others:stress	Unclear	1e-114
Zjn_sc00057.1.g00510.1.am.mk	LOC_Os02g57280.1	down	58/139(41%)	Others:Stress	Unclear	3e-21
Zjn_sc00002.1.g10050.1.sm.mk	AT3G12580.1	down	42/107(39%)	Others:stress and detoxification	unclear	3e-10
Zjn_sc00004.1.g07810.1.sm.mkhc	AT2G18050.1	up	75/173(43%)	Others:stress and detoxification	unclear	3e-29
Zjn_sc00028.1.g00310.1.sm.mkhc	AT2G02390.1	down	50/103(48%)	Others:stress and detoxification	unclear	4e-18
Zjn_sc00029.1.g01440.1.am.mkhc	AT1G53580.1	up	155/266(58%)	Others:stress and detoxification	unclear	4e-78
Zjn_sc00039.1.g00330.1.sm.mkhc	AT5G52640.1	down	298/711(41%)	Others:stress and detoxification	unclear	1e-152
Zjn_sc00106.1.g00420.1.sm.mkhc	AT5G52640.1	down	295/716(41%)	Others:stress and detoxification	unclear	1e-145
Zjn_sc01161.1.g00010.1.sm.mkhc	AT5G52640.1	down	223/435(51%)	Others:stress and detoxification	unclear	1e-115
Zjn_sc00014.1.g04080.1.sm.mkhc	AT5G43900.1	up	166/238(69%)	Others:Structural	unclear	6e-91
Zjn_sc00021.1.g01970.1.sm.mkhc	AT1G52080.1	up	54/182(29%)	Others:Structural	unclear	7e-13
Zjn_sc00027.1.g00950.1.sm.mkhc	AT1G52080.1	down	157/452(34%)	Others:Structural	unclear	8e-61
Zjn_sc00036.1.g03820.1.am.mk	AT1G52080.1	up	121/396(30%)	Others:Structural	unclear	5e-34
Zjn_sc00100.1.g00790.1.am.mk	AT3G11430.1	up	138/195(70%)	Others:transmembrane transporter	unclear	1e-80
Zjn_sc00003.1.g05610.1.sm.mkhc	AT2G39970.1	up	167/361(46%)	Others:transport	unclear	7e-72
Zjn_sc00003.1.g07710.1.sm.mkhc	AT2G39970.1	down	185/349(53%)	Others:transport	unclear	2e-93
Zjn_sc00008.1.g07360.1.sm.mkhc	AT1G59870.1	up	31/52(59%)	Others:transporter	Unclear	3e-11
Zjn_sc00069.1.g03520.1.sm.mkhc	AT1G59870.1	up	42/97(43%)	Others:transporter	Unclear	3e-15
Zjn_sc00009.1.g10210.1.sm.mk	AT1G73040.1	down	67/143(46%)	Others:unclear	unclear	3e-35
Zjn_sc00010.1.g00970.1.am.mk	AT1G73040.1	down	48/157(30%)	Others:unclear	unclear	1e-12
Zjn_sc00010.1.g00990.1.sm.mk	AT1G73040.1	down	52/143(36%)	Others:unclear	unclear	1e-15
Zjn_sc00013.1.g01080.1.sm.mkhc	AT3G08990.1	up	44/102(43%)	Others:unclear	unclear	5e-17
Zjn_sc00018.1.g07600.1.sm.mk	AT3G25570.1	down	192/350(54%)	Others:unclear	unclear	7e-97
Zjn_sc00039.1.g02590.1.sm.mk	AT5G11210.1	up	155/444(34%)	Others:unclear	unclear	3e-76
Zjn_sc00066.1.g02390.1.am.mk	AT5G11210.1	down	314/772(40%)	Others:unclear	unclear	1e-171
Zjn_sc00083.1.g00560.1.am.mk 11	AT1G73040.1	down	49/146(33%)	Others:unclear	unclear	5e-13
Zjn_sc00088.1.g00180.1.am.mkhc	AT3G08990.1	up	72/112(64%)	Others:unclear	unclear	6e-41
Zjn_sc00103.1.g00420.1.am.mk	AT5G28830.1	down	32/119(26%)	Others:unclear	unclear	2e-09
Zjn_sc00158.1.g00060.1.sm.mkhc	AT3G62900.1	up	382/1480(25%)	Others:unclear	unclear	6e-90
Zjn_sc00003.1.g08420.1.sm.mkhc	AT2G01740.1	down	38/136(27%)	Others:unknown	unclear	4e-09
Zjn_sc00003.1.g15090.1.am.mk	AT4G40020.1	down	106/474(22%)	Others:unknown	unclear	3e-13
Zjn_sc00004.1.g08770.1.am.mk	AT4G40020.1	up	125/474(26%)	Others:unknown	unclear	7e-29
Zjn_sc00005.1.g04640.1.am.mk	LOC_Os05g08420.1	down	48/83(57%)	Others:Unknown	Unclear	3e-15
Zjn_sc00008.1.g00810.1.sm.mkhc	AT3G51130.1	up	180/277(64%)	Others:Unknown	Unclear	6e-98
Zjn_sc00008.1.g01950.1.am.mk	AT1G18210.2	down	46/148(31%)	Others:Unknown	Unclear	5e-15
Zjn_sc00009.1.g01130.1.sm.mkhc	AT1G05340.1	down	20/51(39%)	Others:Unknown	Unclear	7e-07
Zjn_sc00009.1.g02340.1.am.mk	LOC_Os01g69840.1	down	45/83(54%)	Others:Unknown	Unclear	4e-17
Zjn_sc00009.1.g03130.1.sm.mkhc	LOC_Os01g68450.1	down	216/278(77%)	Others:Unknown	Unclear	1e-117
Zjn_sc00010.1.g03780.1.sm.mk	AT4G40020.1	up	112/482(23%)	Others:unknown	unclear	4e-20
Zjn_sc00011.1.g05880.1.am.mk	LOC_Os05g08420.1	down	51/75(68%)	Others:Unknown	Unclear	1e-22
Zjn_sc00013.1.g03730.1.sm.mkhc	AT5G10860.1	up	107/206(51%)	Others:Unknown	Unclear	1e-50
Zjn_sc00016.1.g03380.1.am.mk	LOC_Os05g08420.1	down	78/125(62%)	Others:Unknown	Unclear	9e-33
Zjn_sc00022.1.g04100.1.sm.mkhc	AT4G19370.1	up	39/108(36%)	Others:unknown	unclear	8e-16
Zjn_sc00023.1.g01200.1.am.mk	AT2G01740.1	down	104/492(21%)	Others:unknown	unclear	4e-24
Zjn_sc00031.1.g00370.1.sm.mkhc	AT3G51730.1	up	62/197(31%)	Others:Unknown	Unclear	2e-24
Zjn_sc00045.1.g00010.1.cf.mkhc	AT2G01740.1	down	91/340(26%)	Others:unknown	unclear	2e-32
Zjn_sc00045.1.g03260.1.sm.mk	AT2G01740.1	down	94/415(22%)	Others:unknown	unclear	2e-34
Zjn_sc00056.1.g03730.1.sm.mkhc	AT5G53550.1	up	395/605(65%)	Others:Unknown	Unclear	0
Zjn_sc00067.1.g00160.1.am.mk	AT2G01740.1	up	42/182(23%)	Others:unknown	unclear	8e-09
Zjn_sc00067.1.g01470.1.am.mkhc	AT2G01740.1	down	118/494(23%)	Others:unknown	unclear	6e-36
Zjn_sc00068.1.g00050.1.sm.mk	AT2G01740.1	down	133/533(24%)	Others:unknown	unclear	1e-50
Zjn_sc00081.1.g00200.1.sm.mkhc	AT1G73750.1	up	67/107(62%)	Others:Unknown	Unclear	1e-35
Zjn_sc00112.1.g00510.1.sm.mkhc	AT2G01740.1	down	79/324(24%)	Others:unknown	unclear	2e-21
Zjn_sc00132.1.g00390.1.sm.mk	AT2G01740.1	down	67/300(22%)	Others:unknown	unclear	1e-22
Zjn_sc00138.1.g00320.1.sm.mkhc	AT3G25480.1	down	44/102(43%)	Others:Unknown	Unclear	8e-19
Zjn_sc00004.1.g09920.1.am.mk	AT2G10940.2	down	69/157(43%)	Othersa(lipid transport)	unclear	1e-27
Zjn_sc00023.1.g02930.1.am.mk	AT2G10940.2	down	75/176(42%)	Othersa(lipid transport)	unclear	1e-29
Zjn_sc00001.1.g02540.1.am.mk	GSMUA_Achr6T14620_001	up	60/230(26%)	Oxidative stress	Unclear	3e-08
Zjn_sc00005.1.g00750.1.sm.mkhc	GSMUA_Achr5T26970_001	down	570/892(63%)	Oxidative stress	Unclear	0
Zjn_sc00009.1.g07450.1.sm.mkhc	GSMUA_Achr5T26970_001	down	274/627(43%)	Oxidative stress	Unclear	1e-143
Zjn_sc00015.1.g02680.1.sm.mk	GSMUA_Achr5T26970_001	up	141/281(50%)	Oxidative stress	Unclear	2e-64
Zjn_sc00005.1.g08960.1.sm.mkhc	GSMUA_Achr11T23740_001	up	105/314(33%)	Protein (de)phosphorylation	Unclear	1e-28
Zjn_sc00007.1.g02270.1.sm.mkhc	GSMUA_Achr9T13450_001	up	75/137(54%)	Protein (de)phosphorylation	Unclear	2e-34
Zjn_sc00022.1.g05890.1.am.mkhc	GSMUA_Achr8T15460_001	up	69/103(66%)	Protein (de)phosphorylation	Unclear	4e-39
Zjn_sc00040.1.g03490.1.sm.mkhc	GSMUA_Achr11T23740_001	up	67/201(33%)	Protein (de)phosphorylation	Unclear	1e-21
Zjn_sc00045.1.g02730.1.sm.mk	GSMUA_Achr9T13450_001	up	63/110(57%)	Protein (de)phosphorylation	Unclear	4e-32
Zjn_sc00124.1.g00190.1.sm.mkhc	AT1G21160.1	down	55/152(36%)	Protein biosynthesis	unclear	9e-16
PB.2484	AT1G01300.1	up	167/406(41%)	Protein degradation/modification	unclear	3e-72
PB.3469	AT1G26150.1	down	73/258(28%)	Protein degradation/modification	unclear	1e-11
PB.5675	AT5G06570.2	up	101/274(36%)	Protein degradation/modification	unclear	6e-41
PB.9763	AT5G06570.2	down	79/225(35%)	Protein degradation/modification	unclear	6e-27
Zjn_sc00001.1.g10900.1.sm.mkhc	AT3G10450.1	up	201/470(42%)	Protein degradation/modification	unclear	1e-111
Zjn_sc00002.1.g00710.1.sm.mk	AT3G28690.2	down	43/98(43%)	Protein degradation/modification	unclear	4e-15
Zjn_sc00002.1.g03130.1.am.mk	AT4G13830.2	down	49/126(38%)	Protein degradation/modification	unclear	9e-17
Zjn_sc00002.1.g05070.1.sm.mk	AT2G30040.1	down	139/327(42%)	Protein degradation/modification	unclear	3e-58
Zjn_sc00002.1.g07450.1.sm.mk	AT5G06570.2	up	64/168(38%)	Protein degradation/modification	unclear	3e-24
Zjn_sc00002.1.g09820.1.sm.mkhc	AK243037.1	up	321/357(89%)	Protein degradation/modification	unclear	0
Zjn_sc00002.1.g10570.1.am.mk	AT3G61980.1	up	67/124(54%)	Protein degradation/modification	unclear	5e-29
Zjn_sc00003.1.g03700.1.sm.mk	AT2G30040.1	down	131/342(38%)	Protein degradation/modification	unclear	8e-50
Zjn_sc00003.1.g03790.1.sm.mkhc	AT3G47340.1	up	405/545(74%)	Protein degradation/modification	unclear	0
Zjn_sc00003.1.g05370.1.sm.mkhc	AT3G61960.2	up	86/213(40%)	Protein degradation/modification	unclear	8e-36
Zjn_sc00003.1.g07820.1.sm.mkhc	AK243037.1	up	277/306(90%)	Protein degradation/modification	unclear	1e-168
Zjn_sc00003.1.g10720.1.am.mk	AT5G21950.1	up	91/277(32%)	Protein degradation/modification	unclear	2e-30
Zjn_sc00003.1.g11820.1.sm.mk	AT1G32940.1	up	71/183(38%)	Protein degradation/modification	unclear	5e-27
Zjn_sc00003.1.g12820.1.sm.mk	AT1G08050.1	up	266/626(42%)	Protein degradation/modification	unclear	1e-123
Zjn_sc00004.1.g00620.1.sm.mkhc	AT1G05000.1	up	120/161(74%)	Protein degradation/modification	unclear	4e-72
Zjn_sc00004.1.g02910.1.am.mk	AT3G59350.3	down	134/336(39%)	Protein degradation/modification	unclear	4e-66
Zjn_sc00004.1.g04080.1.am.mk	AT1G08050.1	up	234/479(48%)	Protein degradation/modification	unclear	1e-119
Zjn_sc00004.1.g11910.1.sm.mkhc	BAE80740.1	up	78/153(50%)	Protein degradation/modification	unclear	2e-40
Zjn_sc00004.1.g13960.1.am.mk	AT1G01300.1	down	121/393(30%)	Protein degradation/modification	unclear	5e-30
Zjn_sc00004.1.g14040.1.sm.mkhc	AT2G17220.1	down	141/342(41%)	Protein degradation/modification	unclear	6e-61
Zjn_sc00005.1.g01730.1.am.mk	AT3G17410.1	up	76/125(60%)	Protein degradation/modification	unclear	1e-39
Zjn_sc00006.1.g01090.1.sm.mkhc	AK059358.1	down	56/78(71%)	Protein degradation/modification	unclear	2e-25
Zjn_sc00006.1.g02360.1.am.mk	AT3G24860.1	up	86/318(27%)	Protein degradation/modification	unclear	2e-21
Zjn_sc00006.1.g06850.1.sm.mkhc	BN000093.1	up	284/375(75%)	Protein degradation/modification	unclear	1e-170
Zjn_sc00007.1.g00710.1.am.mk	AT3G17410.1	up	92/316(29%)	Protein degradation/modification	unclear	3e-23
Zjn_sc00007.1.g06520.1.am.mk	AT5G10770.1	down	74/186(39%)	Protein degradation/modification	unclear	1e-30
Zjn_sc00007.1.g12160.1.sm.mkhc	AT1G08050.1	up	306/656(46%)	Protein degradation/modification	unclear	1e-151
Zjn_sc00008.1.g00990.1.am.mk	AT1G55270.1	down	87/367(23%)	Protein degradation/modification	unclear	5e-11
Zjn_sc00008.1.g01840.1.am.mk	AT5G63370.2	up	103/323(31%)	Protein degradation/modification	unclear	3e-30
Zjn_sc00008.1.g04100.1.am.mk	AT3G59350.3	down	60/169(35%)	Protein degradation/modification	unclear	4e-19
Zjn_sc00008.1.g10820.1.sm.mkhc	AT3G16800.2	up	95/205(46%)	Protein degradation/modification	unclear	6e-53
Zjn_sc00009.1.g02070.1.am.mkhc	AT5G44290.2	up	239/393(60%)	Protein degradation/modification	unclear	1e-134
Zjn_sc00009.1.g06940.1.am.mk	AT2G39710.1	down	214/413(51%)	Protein degradation/modification	unclear	1e-115
Zjn_sc00009.1.g08440.1.am.mkhc	AT5G59700.1	up	87/259(33%)	Protein degradation/modification	unclear	2e-21
Zjn_sc00009.1.g08600.1.sm.mkhc	AT5G59700.1	up	176/376(46%)	Protein degradation/modification	unclear	9e-84
Zjn_sc00010.1.g03670.1.am.mk	AT5G44290.2	up	74/200(37%)	Protein degradation/modification	unclear	8e-29
Zjn_sc00011.1.g01440.1.sm.mkhc	AT1G26150.1	up	84/185(45%)	Protein degradation/modification	unclear	3e-33
Zjn_sc00011.1.g08260.1.cf-es.mkhc	AT3G59350.3	up	144/342(42%)	Protein degradation/modification	unclear	7e-63
Zjn_sc00012.1.g00640.1.sm.mk	AT3G45010.1	down	128/402(31%)	Protein degradation/modification	unclear	7e-55
Zjn_sc00012.1.g01280.1.sm.mkhc	AT1G11910.1	up	172/245(70%)	Protein degradation/modification	unclear	2e-97
Zjn_sc00012.1.g07300.1.am.mk	AT5G01920.1	down	283/421(67%)	Protein degradation/modification	unclear	1e-167
Zjn_sc00012.1.g08020.1.sm.mk	AT1G79320.1	down	190/415(45%)	Protein degradation/modification	unclear	3e-94
Zjn_sc00012.1.g08800.1.am.mkhc	AT4G14350.1	up	127/228(55%)	Protein degradation/modification	unclear	6e-66
Zjn_sc00013.1.g02480.1.sm.mkhc	AT5G11650.1	up	160/379(42%)	Protein degradation/modification	unclear	2e-75
Zjn_sc00013.1.g06670.1.am.mk	AT5G06570.2	up	93/206(45%)	Protein degradation/modification	unclear	5e-45
Zjn_sc00013.1.g06920.1.sm.mkhc	AT4G14900.1	down	211/541(39%)	Protein degradation/modification	unclear	1e-101
Zjn_sc00014.1.g07340.1.am.mk	AT2G30580.1	down	23/35(65%)	Protein degradation/modification	unclear	3e-08
Zjn_sc00014.1.g09680.1.sm.mk	AT1G57870.3	down	181/339(53%)	Protein degradation/modification	unclear	4e-90
Zjn_sc00016.1.g05990.1.sm.mkhc	AT2G39570.1	down	100/173(57%)	Protein degradation/modification	unclear	3e-53
Zjn_sc00017.1.g00390.1.sm.mkhc	AT1G08050.1	up	314/705(44%)	Protein degradation/modification	unclear	1e-149
Zjn_sc00017.1.g01110.1.sm.mk	AT2G25070.1	up	31/67(46%)	Protein degradation/modification	unclear	1e-12
Zjn_sc00017.1.g03490.1.am.mk	AT1G26150.1	up	53/140(37%)	Protein degradation/modification	unclear	8e-11
Zjn_sc00017.1.g03570.1.sm.mkhc	AT5G08590.1	up	237/352(67%)	Protein degradation/modification	unclear	1e-132
Zjn_sc00017.1.g06710.1.sm.mkhc	AT1G70530.1	down	92/223(41%)	Protein degradation/modification	unclear	1e-38
Zjn_sc00018.1.g05280.1.am.mk	AT5G65600.1	up	79/176(44%)	Protein degradation/modification	unclear	8e-33
Zjn_sc00020.1.g02920.1.sm.mkhc	AT1G55270.1	up	87/306(28%)	Protein degradation/modification	unclear	2e-23
Zjn_sc00021.1.g00670.1.sm.mkhc	AT1G15410.1	down	126/288(43%)	Protein degradation/modification	unclear	8e-61
Zjn_sc00021.1.g01110.1.am.mk	AT2G39360.1	down	129/287(44%)	Protein degradation/modification	unclear	3e-64
Zjn_sc00022.1.g02290.1.sm.mkhc	AT1G23030.1	up	244/483(50%)	Protein degradation/modification	unclear	1e-124
Zjn_sc00022.1.g08140.1.am.mk	AT1G73080.1	up	57/167(34%)	Protein degradation/modification	unclear	1e-19
Zjn_sc00023.1.g04840.1.sm.mkhc	AAD48496.1	up	56/85(65%)	Protein degradation/modification	unclear	4e-34
Zjn_sc00023.1.g07270.1.sm.mkhc	AT5G08590.1	down	141/217(64%)	Protein degradation/modification	unclear	1e-76
Zjn_sc00024.1.g01480.1.am.mk	AT5G59700.1	up	265/578(45%)	Protein degradation/modification	unclear	1e-137
Zjn_sc00026.1.g01820.1.sm.mkhc	AT5G44290.2	down	304/580(52%)	Protein degradation/modification	unclear	1e-160
Zjn_sc00030.1.g03490.1.sm.mk	AT5G06570.2	up	148/333(44%)	Protein degradation/modification	unclear	9e-74
Zjn_sc00035.1.g00040.1.am.mkhc	AK059358.1	up	270/392(68%)	Protein degradation/modification	unclear	1e-139
Zjn_sc00035.1.g00950.1.am.mk	AT3G13380.1	up	689/1218(56%)	Protein degradation/modification	unclear	0
Zjn_sc00036.1.g00030.1.sm.mkhc	AT1G48790.1	up	28/64(43%)	Protein degradation/modification	unclear	8e-09
Zjn_sc00038.1.g00450.1.am.mk	AT1G26150.1	up	63/245(25%)	Protein degradation/modification	unclear	2e-07
Zjn_sc00038.1.g01650.1.am.mkhc	AT3G03710.1	down	32/98(32%)	Protein degradation/modification	unclear	3e-07
Zjn_sc00040.1.g01080.1.sm.mk	AK103253.1	down	232/488(47%)	Protein degradation/modification	unclear	1e-134
Zjn_sc00043.1.g01170.1.sm.mkhc	AT2G39050.1	down	132/331(39%)	Protein degradation/modification	unclear	8e-56
Zjn_sc00043.1.g03260.1.sm.mkhc	AT5G11650.1	up	167/212(78%)	Protein degradation/modification	unclear	3e-98
Zjn_sc00045.1.g02330.1.sm.mkhc	AT3G15890.1	up	32/56(57%)	Protein degradation/modification	unclear	2e-14
Zjn_sc00051.1.g01590.1.am.mkhc	AT3G03710.1	down	219/310(70%)	Protein degradation/modification	unclear	1e-125
Zjn_sc00053.1.g02720.1.sm.mkhc	AT5G08590.1	down	162/325(49%)	Protein degradation/modification	unclear	1e-83
Zjn_sc00056.1.g01760.1.am.mk	AT1G47056.1	up	182/348(52%)	Protein degradation/modification	unclear	4e-94
Zjn_sc00056.1.g03810.1.cf.mkhc	AT1G30600.1	up	76/212(35%)	Protein degradation/modification	unclear	8e-32
Zjn_sc00058.1.g01240.1.am.mk	AT1G26150.1	up	37/128(28%)	Protein degradation/modification	unclear	4e-07
Zjn_sc00059.1.g02050.1.sm.mkhc	AT1G73270.1	up	129/237(54%)	Protein degradation/modification	unclear	5e-72
Zjn_sc00060.1.g00880.1.sm.mkhc	AT1G22280.1	up	41/80(51%)	Protein degradation/modification	unclear	3e-20
Zjn_sc00062.1.g00490.1.am.mk	AT1G23780.1	up	57/225(25%)	Protein degradation/modification	unclear	4e-10
Zjn_sc00065.1.g01970.1.sm.mkhc	AT2G30580.1	up	53/84(63%)	Protein degradation/modification	unclear	2e-27
Zjn_sc00066.1.g00550.1.am.mkhc	AT1G26150.1	up	56/186(30%)	Protein degradation/modification	unclear	5e-10
Zjn_sc00066.1.g01390.1.sm.mkhc	AT1G08050.1	down	322/711(45%)	Protein degradation/modification	unclear	1e-154
Zjn_sc00066.1.g03350.1.sm.mkhc	AT1G05000.1	up	86/169(50%)	Protein degradation/modification	unclear	1e-41
Zjn_sc00068.1.g03180.1.sm.mk	AT4G36040.1	up	45/95(47%)	Protein degradation/modification	unclear	1e-18
Zjn_sc00071.1.g00410.1.sm.mk	AT1G20650.1	up	75/171(43%)	Protein degradation/modification	unclear	4e-35
Zjn_sc00075.1.g01270.1.am.mk	AT2G30360.1	up	174/404(43%)	Protein degradation/modification	unclear	2e-86
Zjn_sc00085.1.g00820.1.am.mk 7	AT3G13380.1	up	589/1080(54%)	Protein degradation/modification	unclear	0
Zjn_sc00087.1.g00980.1.sm.mk	AT1G08050.1	up	117/431(27%)	Protein degradation/modification	unclear	3e-37
Zjn_sc00087.1.g01220.1.am.mk	AT1G26150.1	up	108/326(33%)	Protein degradation/modification	unclear	3e-28
Zjn_sc00088.1.g01840.1.am.mk	AT3G23000.1	down	219/424(51%)	Protein degradation/modification	unclear	1e-113
Zjn_sc00096.1.g02170.1.am.mk	AT2G38860.2	down	196/399(49%)	Protein degradation/modification	unclear	1e-105
Zjn_sc00105.1.g01730.1.am.mk	AT3G23000.1	down	219/421(52%)	Protein degradation/modification	unclear	1e-113
Zjn_sc00114.1.g00250.1.sm.mk	AB092555.1	up	43/74(58%)	Protein degradation/modification	unclear	5e-16
Zjn_sc00115.1.g00610.1.am.mk	AT3G17410.1	up	84/158(53%)	Protein degradation/modification	unclear	1e-45
Zjn_sc00115.1.g01040.1.am.mkhc	AT3G06110.3	down	34/92(36%)	Protein degradation/modification	unclear	7e-14
Zjn_sc00131.1.g00410.1.sm.mk	AT1G73540.1	down	80/154(51%)	Protein degradation/modification	unclear	4e-40
Zjn_sc00132.1.g00480.1.am.mk	AT1G73080.1	down	140/449(31%)	Protein degradation/modification	unclear	8e-50
Zjn_sc00133.1.g00580.1.sm.mk	AT3G45010.1	up	124/440(28%)	Protein degradation/modification	unclear	3e-43
Zjn_sc00135.1.g00100.1.sm.mkhc	AT4G11800.1	up	125/205(60%)	Protein degradation/modification	unclear	9e-69
Zjn_sc00148.1.g00210.1.am.mk	AT5G09530.1	down	54/203(26%)	Protein degradation/modification	unclear	2e-23
Zjn_sc00153.1.g00240.1.sm.mkhc	AT1G79320.1	up	57/152(37%)	Protein degradation/modification	unclear	1e-17
Zjn_sc00153.1.g00270.1.am.mk	AT1G79320.1	up	55/149(36%)	Protein degradation/modification	unclear	9e-21
Zjn_sc00160.1.g00180.1.sm.mkhc	AT1G04700.1	down	177/280(63%)	Protein degradation/modification	unclear	1e-102
Zjn_sc00207.1.g00150.1.am.mk	AT5G18140.1	down	44/163(26%)	Protein degradation/modification	unclear	4e-07
Zjn_sc00292.1.g00020.1.am.mk	AT3G51370.1	up	89/297(29%)	Protein degradation/modification	unclear	2e-21
Zjn_sc01873.1.g00010.1.sm.mk	AT1G79320.1	up	36/94(38%)	Protein degradation/modification	unclear	2e-10
Zjn_sc02717.1.g00010.1.am.mkhc	AT1G11910.1	up	148/208(71%)	Protein degradation/modification	unclear	2e-86
Zjn_sc09552.1.g00010.1.am.mk	AT5G65600.1	down	57/197(28%)	Protein degradation/modification	unclear	2e-18
Zjn_sc00002.1.g15610.1.am.mkhc	AT1G76360.1	down	50/88(56%)	Protein degradation/modification(phosphorylation)	unclear	2e-21
Zjn_sc00027.1.g01850.1.am.mk	AT2G20560.1	up	259/353(73%)	Protein degradation/modification(protein folding)	unclear	1e-150
Zjn_sc00034.1.g05370.1.sm.mkhc	AT2G20560.1	up	121/338(35%)	Protein degradation/modification(protein folding)	unclear	8e-55
Zjn_sc00067.1.g01730.1.am.mkhc	AT2G20560.1	down	89/341(26%)	Protein degradation/modification(protein folding)	unclear	2e-18
Zjn_sc00005.1.g02480.1.am.mk	AT1G68050.1	down	59/184(32%)	Protein degradation/modification:F-box	unclear	2e-16
Zjn_sc00009.1.g02400.1.sm.mkhc	AT1G67340.1	down	162/330(49%)	Protein degradation/modification:F-box	unclear	1e-81
Zjn_sc00025.1.g02310.1.sm.mkhc	AT1G21410.1	up	121/170(71%)	Protein degradation/modification:F-box	unclear	3e-67
Zjn_sc00034.1.g02880.1.sm.mkhc	AT1G67340.1	down	147/327(44%)	Protein degradation/modification:F-box	unclear	3e-71
Zjn_sc00038.1.g00300.1.am.mkhc	AT2G03530.2	up	287/402(71%)	Protein degradation/modification:F-box	unclear	1e-168
Zjn_sc00038.1.g00320.1.am.mk	AT2G03530.2	up	261/412(63%)	Protein degradation/modification:F-box	unclear	1e-144
Zjn_sc00038.1.g00580.1.am.mk	AT2G03530.2	up	210/489(42%)	Protein degradation/modification:F-box	unclear	8e-93
Zjn_sc00055.1.g01550.1.am.mk	AT2G03530.2	down	226/401(56%)	Protein degradation/modification:F-box	unclear	1e-120
Zjn_sc00008.1.g02260.1.am.mkhc	AT5G24550.1	up	60/112(53%)	Protein degradation/modification:hydrolase	Unclear	9e-34
Zjn_sc00068.1.g01330.1.sm.mkhc	AT5G24550.1	up	43/74(58%)	Protein degradation/modification:hydrolase	Unclear	5e-23
Zjn_sc00001.1.g07840.1.sm.mkhc	AT4G23150.1	up	103/350(29%)	Protein degradation/modification:phosphorylation	Unclear	4e-28
Zjn_sc00001.1.g07930.1.sm.mk	AT4G23150.1	up	93/290(32%)	Protein degradation/modification:phosphorylation	Unclear	7e-25
Zjn_sc00035.1.g01760.1.sm.mkhc	AT4G23150.1	up	95/190(50%)	Protein degradation/modification:phosphorylation	Unclear	5e-48
Zjn_sc00088.1.g01680.1.sm.mk	AT4G23150.1	up	56/197(28%)	Protein degradation/modification:phosphorylation	Unclear	4e-19
Zjn_sc00009.1.g04160.1.sm.mkhc	AT5G53350.1	up	85/186(45%)	Protein degradation/modification:protease	Unclear	5e-35
Zjn_sc00092.1.g00080.1.sm.mkhc	AT5G53350.1	up	171/362(47%)	Protein degradation/modification:protease	Unclear	2e-72
Zjn_sc00002.1.g10530.1.am.mkhc	AT2G33170.1	up	86/216(39%)	Protein degradation/modification:protein kinase	unclear	9e-36
Zjn_sc00014.1.g05930.1.sm.mk	AT2G33170.1	down	238/600(39%)	Protein degradation/modification:protein kinase	unclear	1e-113
Zjn_sc00030.1.g01310.1.sm.mk	AT2G33170.1	down	221/616(35%)	Protein degradation/modification:protein kinase	unclear	6e-96
Zjn_sc00045.1.g00060.1.sm.mkhc	AT3G14840.2	up	50/104(48%)	Protein degradation/modification:protein kinase	unclear	2e-25
Zjn_sc00051.1.g02600.1.am.mk	AT2G33170.1	down	140/424(33%)	Protein degradation/modification:protein kinase	unclear	7e-54
Zjn_sc00056.1.g01780.1.es.mkhc	AT2G33170.1	up	682/1105(61%)	Protein degradation/modification:protein kinase	unclear	0
Zjn_sc00148.1.g00630.1.sm.mkhc	AT2G33170.1	up	252/519(48%)	Protein degradation/modification:protein kinase	unclear	1e-130
Zjn_sc00022.1.g07050.1.sm.mkhc	AT2G39110.1	up	155/367(42%)	Protein degradation/modification:protein kinase activity	unclear	4e-78
Zjn_sc00001.1.g02060.1.am.mk	AT1G70690.1	down	35/136(25%)	Protein degradation/modification:protein kinase and phosphatases	unclear	5e-09
Zjn_sc00002.1.g06210.1.am.mk	AT1G70690.1	up	64/234(27%)	Protein degradation/modification:protein kinase and phosphatases	unclear	4e-21
Zjn_sc00002.1.g07800.1.sm.mk	AT5G04720.1	down	172/713(24%)	Protein degradation/modification:protein kinase and phosphatases	unclear	4e-19
Zjn_sc00002.1.g07930.1.am.mk	AT4G25390.1	up	288/690(41%)	Protein degradation/modification:protein kinase and phosphatases	unclear	1e-123
Zjn_sc00002.1.g08390.1.sm.mkhc	AT1G03080.1	up	98/424(23%)	Protein degradation/modification:protein kinase and phosphatases	unclear	5e-09
Zjn_sc00003.1.g01290.1.am.mkhc	AT3G08720.2	up	311/476(65%)	Protein degradation/modification:protein kinase and phosphatases	unclear	1e-176
Zjn_sc00004.1.g10910.1.sm.mkhc	AT2G19130.1	up	156/497(31%)	Protein degradation/modification:protein kinase and phosphatases	unclear	4e-59
Zjn_sc00004.1.g12140.1.am.mk	AT2G19130.1	down	198/645(30%)	Protein degradation/modification:protein kinase and phosphatases	unclear	2e-76
Zjn_sc00007.1.g01990.1.sm.mkhc	AT4G29380.1	up	829/1561(53%)	Protein degradation/modification:protein kinase and phosphatases	unclear	0
Zjn_sc00009.1.g08180.1.sm.mkhc	AT3G08760.1	up	136/253(53%)	Protein degradation/modification:protein kinase and phosphatases	unclear	4e-69
Zjn_sc00011.1.g00570.1.sm.mk	AT1G03080.1	down	112/589(19%)	Protein degradation/modification:protein kinase and phosphatases	unclear	1e-11
Zjn_sc00012.1.g00900.1.sm.mkhc	AT3G46930.1	up	110/290(37%)	Protein degradation/modification:protein kinase and phosphatases	unclear	9e-53
Zjn_sc00012.1.g00920.1.am.mk	AT2G18170.1	up	41/81(50%)	Protein degradation/modification:protein kinase and phosphatases	unclear	3e-18
Zjn_sc00015.1.g02140.1.sm.mk	AT4G30960.1	down	266/426(62%)	Protein degradation/modification:protein kinase and phosphatases	unclear	1e-151
Zjn_sc00016.1.g01580.1.sm.mk	AT5G35370.1	up	46/126(36%)	Protein degradation/modification:protein kinase and phosphatases	unclear	7e-17
Zjn_sc00016.1.g01980.1.am.mk	AT2G19130.1	down	97/314(30%)	Protein degradation/modification:protein kinase and phosphatases	unclear	1e-35
Zjn_sc00017.1.g01210.1.sm.mkhc	AT1G03080.1	up	316/1648(19%)	Protein degradation/modification:protein kinase and phosphatases	unclear	3e-17
Zjn_sc00018.1.g03760.1.sm.mk	AT5G35370.1	up	361/896(40%)	Protein degradation/modification:protein kinase and phosphatases	unclear	1e-164
Zjn_sc00018.1.g07280.1.sm.mk	AT5G10930.1	down	250/440(56%)	Protein degradation/modification:protein kinase and phosphatases	unclear	1e-149
Zjn_sc00021.1.g00710.1.sm.mkhc	AT5G10740.1	down	40/129(31%)	Protein degradation/modification:protein kinase and phosphatases	unclear	4e-09
Zjn_sc00024.1.g01780.1.sm.mk	AT1G03080.1	down	105/466(22%)	Protein degradation/modification:protein kinase and phosphatases	unclear	4e-16
Zjn_sc00027.1.g00460.1.am.mk	AT3G46930.1	down	65/235(27%)	Protein degradation/modification:protein kinase and phosphatases	unclear	3e-19
Zjn_sc00027.1.g00890.1.sm.mkhc	AT3G46930.1	up	116/326(35%)	Protein degradation/modification:protein kinase and phosphatases	unclear	1e-50
Zjn_sc00029.1.g05730.1.sm.mkhc	AT3G46930.1	up	188/429(43%)	Protein degradation/modification:protein kinase and phosphatases	unclear	3e-94
Zjn_sc00030.1.g03310.1.sm.mk	AT4G39270.1	down	199/721(27%)	Protein degradation/modification:protein kinase and phosphatases	unclear	1e-60
Zjn_sc00040.1.g05040.1.am.mk	AT1G07430.1	down	185/323(57%)	Protein degradation/modification:protein kinase and phosphatases	unclear	3e-99
Zjn_sc00043.1.g01010.1.sm.mk	AT3G46930.1	down	122/304(40%)	Protein degradation/modification:protein kinase and phosphatases	unclear	6e-60
Zjn_sc00043.1.g02470.1.sm.mk	AT5G51770.1	up	33/86(38%)	Protein degradation/modification:protein kinase and phosphatases	unclear	2e-08
Zjn_sc00043.1.g03400.1.sm.mkhc	AT3G46930.1	down	108/205(52%)	Protein degradation/modification:protein kinase and phosphatases	unclear	4e-62
Zjn_sc00044.1.g00090.1.am.mk	AT5G55560.1	up	196/333(58%)	Protein degradation/modification:protein kinase and phosphatases	unclear	1e-112
Zjn_sc00045.1.g03020.1.es.mkhc	AT3G46930.1	down	86/196(43%)	Protein degradation/modification:protein kinase and phosphatases	unclear	8e-46
Zjn_sc00058.1.g00200.1.sm.mk	AT1G03080.1	down	145/682(21%)	Protein degradation/modification:protein kinase and phosphatases	unclear	2e-23
Zjn_sc00064.1.g00970.1.am.mk	AT2G19130.1	up	27/73(36%)	Protein degradation/modification:protein kinase and phosphatases	unclear	1e-07
Zjn_sc00065.1.g01660.1.am.mkhc	AT3G46930.1	up	127/362(35%)	Protein degradation/modification:protein kinase and phosphatases	unclear	3e-55
Zjn_sc00082.1.g00170.1.sm.mkhc	AT4G04490.1	down	32/69(46%)	Protein degradation/modification:protein kinase and phosphatases	unclear	2e-16
Zjn_sc00108.1.g00600.1.am.mk	AT4G29050.1	up	137/308(44%)	Protein degradation/modification:protein kinase and phosphatases	unclear	1e-67
Zjn_sc00118.1.g00520.1.am.mk	AT3G11410.1	up	44/90(48%)	Protein degradation/modification:protein kinase and phosphatases	unclear	3e-17
Zjn_sc00132.1.g00700.1.sm.mk	AT4G30960.1	up	271/434(62%)	Protein degradation/modification:protein kinase and phosphatases	unclear	1e-151
Zjn_sc00133.1.g00200.1.sm.mk	AT3G46930.1	up	72/246(29%)	Protein degradation/modification:protein kinase and phosphatases	unclear	1e-22
Zjn_sc00140.1.g00270.1.sm.mkhc	AT1G77280.1	up	113/240(47%)	Protein degradation/modification:protein kinase and phosphatases	unclear	8e-52
Zjn_sc00014.1.g10670.1.am.mk	AT2G39840.1	up	133/199(66%)	Protein degradation/modification:protein serine/threonine phosphatase	unclear	4e-79
Zjn_sc00068.1.g02130.1.cf.mkhc	AT3G10150.1	down	72/257(28%)	Protein degradation/modification:protein serine/threonine phosphatase	unclear	3e-15
Zjn_sc00047.1.g01130.1.am.mkhc	AT1G32960.1	down	72/143(50%)	Protein degradation/modification:proteolysis	Unclear	8e-33
Zjn_sc00015.1.g06970.1.sm.mkhc	AT2G43230.2	up	59/83(71%)	Protein degradation/modification:serine/threonine protein kinase	unclear	2e-26
Zjn_sc00044.1.g04520.1.am.mkhc	AT2G21950.1	down	127/322(39%)	Protein degradation/modification:SKP1	Unclear	5e-57
PB.1432	AT1G14400.2	up	60/145(41%)	Protein degradation/modification:Ubiquitin	Unclear	7e-29
PB.12134	GRMZM2G108849_T01	up	176/339(51%)	protein.degradation.cysteine protease	unclear	2e-96
PB.3614	GRMZM2G108849_T01	up	67/144(46%)	protein.degradation.cysteine protease	unclear	3e-33
PB.3616	GRMZM2G108849_T01	up	257/336(76%)	protein.degradation.cysteine protease	unclear	1e-145
Zjn_sc00004.1.g13010.1.am.mkhc	GRMZM2G340065_T01	up	120/162(74%)	protein.degradation.cysteine protease	unclear	1e-60
Zjn_sc00015.1.g02590.1.am.mk	GRMZM2G108849_T03	down	83/171(48%)	protein.degradation.cysteine protease	unclear	1e-34
Zjn_sc00027.1.g05930.1.cf.mkhc	GRMZM2G108849_T01	up	30/83(36%)	protein.degradation.cysteine protease	unclear	9e-11
Zjn_sc00096.1.g00390.1.sm.mk	GRMZM2G108849_T02	up	345/527(65%)	protein.degradation.cysteine protease	unclear	1e-173
Zjn_sc00016.1.g03430.1.am.mk	GRMZM2G020146_T01	up	81/98(82%)	protein.degradation.serine protease	unclear	5e-40
Zjn_sc00024.1.g02140.1.sm.mkhc	GRMZM2G020146_T01	up	170/219(77%)	protein.degradation.serine protease	unclear	1e-86
Zjn_sc00056.1.g03580.1.am.mk	GRMZM2G020146_T01	up	83/159(52%)	protein.degradation.serine protease	unclear	3e-39
Zjn_sc00464.1.g00020.1.sm.mkhc	GRMZM2G020146_T01	up	170/219(77%)	protein.degradation.serine protease	unclear	1e-86
Zjn_sc00007.1.g10690.1.sm.mkhc	GRMZM2G041959_T02	down	492/685(71%)	protein.degradation.ubiquitin.E3.SCF.FBOX	unclear	0
Zjn_sc00115.1.g00850.1.am.mk	GRMZM2G041959_T03	up	62/185(33%)	protein.degradation.ubiquitin.E3.SCF.FBOX	unclear	1e-21
PB.16305	AT2G07751.1	down	35/105(33%)	Redox regulation	unclear	7e-16
PB.16313	AT3G48280.1	down	179/421(42%)	Redox regulation	unclear	5e-85
PB.5196	Z75520.1	down	43/135(31%)	Redox regulation	unclear	1e-14
Zjn_sc00001.1.g01830.1.sm.mkhc	AT2G17420.1	down	63/134(47%)	Redox regulation	unclear	6e-28
Zjn_sc00001.1.g04960.1.sm.mkhc	AT3G26760.1	up	134/272(49%)	redox regulation	unclear	5e-72
Zjn_sc00001.1.g08530.1.am.mk	AT1G07400.1	up	50/117(42%)	Redox regulation	unclear	1e-18
Zjn_sc00002.1.g04350.1.am.mk	AT1G47750.1	up	126/247(51%)	Redox regulation	unclear	1e-62
Zjn_sc00002.1.g04710.1.am.mk	AT3G26760.1	up	119/275(43%)	redox regulation	unclear	4e-63
Zjn_sc00002.1.g07480.1.am.mk	AT1G13340.1	up	61/174(35%)	Redox regulation	unclear	1e-24
Zjn_sc00002.1.g07770.1.sm.mkhc	AT4G23430.2	down	93/312(29%)	redox regulation	unclear	1e-23
Zjn_sc00002.1.g08440.1.am.mk	AT1G07400.1	down	45/124(36%)	Redox regulation	unclear	1e-12
Zjn_sc00002.1.g09110.1.sm.mkhc	AT5G06730.1	up	83/147(56%)	Redox regulation	unclear	8e-41
Zjn_sc00002.1.g14080.1.sm.mkhc	AT4G38540.1	up	44/69(63%)	Redox regulation	unclear	4e-21
Zjn_sc00002.1.g14920.1.am.mk	AT3G48520.1	down	45/123(36%)	Redox regulation	unclear	3e-15
Zjn_sc00003.1.g06140.1.sm.mkhc	AT4G23430.2	down	97/315(30%)	redox regulation	unclear	2e-24
Zjn_sc00004.1.g05370.1.sm.mkhc	AT4G09750.1	up	77/309(24%)	redox regulation	unclear	3e-10
Zjn_sc00004.1.g05550.1.am.mk	AT1G47750.1	down	69/237(29%)	Redox regulation	unclear	4e-24
Zjn_sc00006.1.g00580.1.am.mk	AT3G48280.1	up	197/492(40%)	Redox regulation	unclear	4e-95
Zjn_sc00006.1.g00760.1.sm.mkhc	AT1G14130.1	down	140/291(48%)	Redox regulation	unclear	2e-74
Zjn_sc00006.1.g04180.1.am.mk	AT1G64950.1	up	187/488(38%)	Redox regulation	unclear	2e-88
Zjn_sc00007.1.g04670.1.am.mk	AT3G28850.1	up	141/475(29%)	Redox regulation	unclear	2e-40
Zjn_sc00007.1.g11120.1.am.mk	AT4G09750.1	up	44/144(30%)	redox regulation	unclear	6e-10
Zjn_sc00008.1.g04400.1.sm.mk	AT1G11610.1	down	192/500(38%)	Redox regulation	unclear	7e-97
Zjn_sc00008.1.g04870.1.sm.mk	AT1G07420.1	up	94/272(34%)	Redox regulation	unclear	1e-44
Zjn_sc00009.1.g05120.1.am.mk	AT1G22540.1	up	285/548(52%)	Redox regulation	unclear	1e-163
Zjn_sc00009.1.g06140.1.sm.mkhc	AT4G37320.1	up	205/501(40%)	Redox regulation	unclear	1e-107
Zjn_sc00009.1.g06340.1.sm.mkhc	AT4G37320.1	up	201/501(40%)	Redox regulation	unclear	1e-101
Zjn_sc00011.1.g04520.1.sm.mk	AT4G11410.1	up	59/103(57%)	redox regulation	unclear	2e-29
Zjn_sc00011.1.g06830.1.sm.mkhc	AT3G14680.1	down	277/507(54%)	Redox regulation	unclear	1e-163
Zjn_sc00013.1.g03900.1.am.mk	AT3G26300.1	up	192/504(38%)	Redox regulation	unclear	1e-96
Zjn_sc00013.1.g07500.1.sm.mkhc	AT5G18900.1	up	163/267(61%)	Redox regulation	unclear	2e-92
Zjn_sc00014.1.g01750.1.sm.mkhc	AT1G13340.1	down	135/320(42%)	Redox regulation	unclear	2e-60
Zjn_sc00014.1.g10080.1.sm.mk	AT3G27200.1	down	46/117(39%)	Redox regulation	unclear	1e-16
Zjn_sc00015.1.g04100.1.sm.mkhc	AT3G27200.1	up	52/140(37%)	Redox regulation	unclear	3e-19
Zjn_sc00015.1.g07330.1.sm.mk	AT3G61880.1	down	327/556(58%)	Redox regulation	unclear	1e-174
Zjn_sc00015.1.g08080.1.sm.mkhc	AT1G08830.2	down	82/126(65%)	Redox regulation	unclear	5e-44
Zjn_sc00016.1.g03720.1.sm.mkhc	AT3G51840.1	up	103/235(43%)	Redox regulation	unclear	2e-42
Zjn_sc00023.1.g03040.1.am.mkhc	AT2G07640.1	up	99/147(67%)	Redox regulation	unclear	1e-56
Zjn_sc00023.1.g04930.1.sm.mk	AT1G14540.1	up	36/66(54%)	Redox regulation	unclear	8e-15
Zjn_sc00023.1.g05980.1.sm.mkhc	AT4G22260.1	down	50/97(51%)	Redox regulation	unclear	5e-21
Zjn_sc00025.1.g02270.1.am.mk	AT3G48280.1	up	200/505(39%)	Redox regulation	unclear	1e-100
Zjn_sc00025.1.g03370.1.am.mk	AT3G48520.1	down	141/318(44%)	Redox regulation	unclear	2e-72
Zjn_sc00028.1.g00910.1.am.mk	AT4G37370.1	down	183/475(38%)	Redox regulation	unclear	3e-84
Zjn_sc00028.1.g00920.1.am.mk	AT4G37320.1	down	180/492(36%)	Redox regulation	unclear	7e-76
Zjn_sc00028.1.g04090.1.sm.mkhc	AT5G06720.1	up	32/56(57%)	Redox regulation	unclear	1e-13
Zjn_sc00029.1.g03710.1.sm.mkhc	AT1G13340.1	up	95/337(28%)	Redox regulation	unclear	2e-33
Zjn_sc00030.1.g03370.1.sm.mkhc	AT1G04580.1	down	474/789(60%)	Redox regulation	unclear	0
Zjn_sc00031.1.g00930.1.am.mk	AT3G48520.1	up	142/336(42%)	Redox regulation	unclear	4e-71
Zjn_sc00034.1.g05620.1.am.mk	AT1G22540.1	up	292/541(53%)	Redox regulation	unclear	1e-164
Zjn_sc00034.1.g05680.1.sm.mk	AT1G22540.1	up	300/544(55%)	Redox regulation	unclear	1e-172
Zjn_sc00040.1.g00780.1.sm.mk	AT3G27200.1	up	44/148(29%)	Redox regulation	unclear	2e-12
Zjn_sc00040.1.g02710.1.sm.mk	AT3G48520.1	up	138/337(40%)	Redox regulation	unclear	4e-68
Zjn_sc00043.1.g02190.1.sm.mkhc	AT1G14540.1	up	28/45(62%)	Redox regulation	unclear	1e-12
Zjn_sc00043.1.g04550.1.am.mk	AT3G48280.1	down	210/488(43%)	Redox regulation	unclear	1e-109
Zjn_sc00045.1.g00440.1.am.mk	AT3G26300.1	down	137/418(32%)	Redox regulation	unclear	2e-65
Zjn_sc00045.1.g03730.1.am.mkhc	AT1G13340.1	up	49/177(27%)	Redox regulation	unclear	2e-17
Zjn_sc00050.1.g01290.1.am.mkhc	AT3G48280.1	down	194/500(38%)	Redox regulation	unclear	3e-99
Zjn_sc00051.1.g01920.1.sm.mk	AT3G28850.1	up	67/183(36%)	Redox regulation	unclear	3e-25
Zjn_sc00054.1.g01130.1.am.mk	AT3G48520.1	up	246/471(52%)	Redox regulation	unclear	1e-130
Zjn_sc00057.1.g00090.1.am.mkhc	AT1G19730.1	up	30/93(32%)	Redox regulation	unclear	1e-09
Zjn_sc00061.1.g00350.1.am.mk	AT3G48520.1	up	274/495(55%)	Redox regulation	unclear	1e-153
Zjn_sc00067.1.g03130.1.am.mk	AT1G58520.3	down	126/398(31%)	Redox regulation	unclear	2e-45
Zjn_sc00069.1.g02020.1.am.mk	AT1G80130.1	down	115/321(35%)	Redox regulation	unclear	1e-39
Zjn_sc00069.1.g03090.1.am.mk	AT3G26300.1	down	211/506(41%)	Redox regulation	unclear	1e-111
Zjn_sc00071.1.g00250.1.sm.mk	Z75520.1	down	77/105(73%)	Redox regulation	unclear	6e-42
Zjn_sc00078.1.g02580.1.sm.mkhc	AT3G61880.1	down	333/548(60%)	Redox regulation	unclear	1e-179
Zjn_sc00086.1.g00930.1.sm.mkhc	AT1G09940.1	down	306/456(67%)	Redox regulation	unclear	1e-162
Zjn_sc00086.1.g02520.1.sm.mk	AT3G26280.1	up	203/511(39%)	Redox regulation	unclear	6e-98
Zjn_sc00108.1.g00540.1.sm.mk	AT3G26300.1	up	183/501(36%)	Redox regulation	unclear	1e-91
Zjn_sc00108.1.g01220.1.am.mk	AT4G13180.1	up	142/259(54%)	redox regulation	unclear	1e-78
Zjn_sc00113.1.g00360.1.am.mk	AT3G48280.1	up	183/482(37%)	Redox regulation	unclear	5e-80
Zjn_sc00122.1.g00940.1.am.mk	AT3G61880.1	down	327/550(59%)	Redox regulation	unclear	1e-178
Zjn_sc00138.1.g00820.1.sm.mkhc	AT1G15220.1	down	71/144(49%)	Redox regulation	unclear	4e-31
Zjn_sc00144.1.g00150.1.am.mk	AT4G23430.3	down	71/138(51%)	redox regulation	unclear	5e-29
Zjn_sc00150.1.g00590.1.am.mk	Z75520.1	down	50/63(79%)	Redox regulation	unclear	2e-25
Zjn_sc00150.1.g00600.1.am.mk	Z75520.1	down	77/105(73%)	Redox regulation	unclear	2e-41
Zjn_sc00179.1.g00080.1.am.mk	AT3G48280.1	down	191/514(37%)	Redox regulation	unclear	1e-75
Zjn_sc00194.1.g00250.1.sm.mk	AT5G47000.1	down	81/139(58%)	Redox regulation	unclear	4e-41
Zjn_sc00381.1.g00020.1.am.mk	AT1G47750.1	down	53/146(36%)	Redox regulation	unclear	3e-20
Zjn_sc01199.1.g00010.1.am.mk	Z75520.1	down	77/105(73%)	Redox regulation	unclear	8e-42
Zjn_sc01199.1.g00020.1.am.mk	Z75520.1	down	76/105(72%)	Redox regulation	unclear	3e-41
Zjn_sc00056.1.g00590.1.sm.mkhc	AT5G61640.1	down	109/189(57%)	Redox regulation:Antioxidants	unclear	6e-57
Zjn_sc00013.1.g07460.1.sm.mk	AT3G28580.1	down	248/505(49%)	Redox regulation:ATPase	Unclear	1e-129
Zjn_sc00030.1.g01800.1.cf.mkhc	AT3G28580.1	up	141/207(68%)	Redox regulation:ATPase	Unclear	6e-79
Zjn_sc00031.1.g03010.1.am.mk	AT3G28580.1	down	242/495(48%)	Redox regulation:ATPase	Unclear	1e-122
Zjn_sc00068.1.g03580.1.sm.mkhc	LOC_Os06g51150.1	up	462/492(93%)	Redox regulation:Catalase	Unclear	0
Zjn_sc00002.1.g00600.1.sm.mk	AT5G07990.1	down	235/517(45%)	Redox regulation:flavonoid biosynthesis	Unclear	1e-127
Zjn_sc00002.1.g05240.1.sm.mkhc	AT3G55970.1	up	190/365(52%)	Redox regulation:flavonoid biosynthesis	Unclear	1e-112
Zjn_sc00004.1.g10810.1.sm.mk	AT5G42800.1	down	138/354(38%)	Redox regulation:flavonoid biosynthesis	Unclear	4e-62
Zjn_sc00004.1.g10830.1.am.mk	AT5G42800.1	down	135/342(39%)	Redox regulation:flavonoid biosynthesis	Unclear	8e-64
Zjn_sc00009.1.g07600.1.sm.mkhc	AT3G55970.1	up	209/357(58%)	Redox regulation:flavonoid biosynthesis	Unclear	1e-116
Zjn_sc00023.1.g03920.1.am.mk	AT5G42800.1	down	136/322(42%)	Redox regulation:flavonoid biosynthesis	Unclear	1e-64
Zjn_sc00049.1.g01790.1.sm.mk	AT2G38240.1	down	115/325(35%)	Redox regulation:flavonoid biosynthesis	Unclear	3e-50
Zjn_sc00073.1.g00190.1.am.mk	AT5G07990.1	down	280/468(59%)	Redox regulation:flavonoid biosynthesis	Unclear	1e-163
Zjn_sc00087.1.g01140.1.am.mk	AT5G13930.1	down	323/396(81%)	Redox regulation:flavonoid biosynthesis	Unclear	0
Zjn_sc00141.1.g01150.1.am.mk	AT5G07990.1	down	184/532(34%)	Redox regulation:flavonoid biosynthesis	Unclear	3e-78
Zjn_sc00171.1.g00010.1.am.mk	AT5G13930.1	down	201/402(50%)	Redox regulation:flavonoid biosynthesis	Unclear	1e-104
Zjn_sc05795.1.g00010.1.am.mk	AT5G39050.1	down	75/277(27%)	Redox regulation:flavonoid biosynthesis	Unclear	2e-19
Zjn_sc00001.1.g10320.1.sm.mkhc	AT1G17020.1	down	129/330(39%)	Redox regulation:Flavonoid/anthocyanin pathway	unclear	1e-69
Zjn_sc00001.1.g12480.1.am.mk	AT5G67160.1	up	41/99(41%)	Redox regulation:Flavonoid/anthocyanin pathway	unclear	1e-08
Zjn_sc00004.1.g02260.1.sm.mkhc	AT1G17020.1	down	118/327(36%)	Redox regulation:Flavonoid/anthocyanin pathway	unclear	3e-54
Zjn_sc00004.1.g02270.1.sm.mk	AT1G17020.1	down	115/327(35%)	Redox regulation:Flavonoid/anthocyanin pathway	unclear	3e-47
Zjn_sc00009.1.g01560.1.sm.mk	AT3G21420.1	down	103/188(54%)	Redox regulation:Flavonoid/anthocyanin pathway	unclear	7e-52
Zjn_sc00011.1.g08430.1.sm.mkhc	AT1G17020.1	up	147/352(41%)	Redox regulation:Flavonoid/anthocyanin pathway	unclear	1e-75
Zjn_sc00025.1.g04030.1.am.mk	AT2G37770.2	down	208/319(65%)	Redox regulation:Flavonoid/anthocyanin pathway	unclear	1e-120
Zjn_sc00049.1.g01820.1.sm.mkhc	AT3G21420.1	down	105/264(39%)	Redox regulation:Flavonoid/anthocyanin pathway	unclear	1e-50
Zjn_sc00064.1.g01240.1.am.mk	AT2G37770.2	down	139/325(42%)	Redox regulation:Flavonoid/anthocyanin pathway	unclear	1e-64
Zjn_sc00085.1.g00590.1.sm.mk	AT4G14090.1	down	104/284(36%)	Redox regulation:Flavonoid/anthocyanin pathway	unclear	2e-37
Zjn_sc00092.1.g02280.1.am.mk	AT5G67160.1	down	39/118(33%)	Redox regulation:Flavonoid/anthocyanin pathway	unclear	3e-12
Zjn_sc00008.1.g06130.1.sm.mkhc	AT2G46950.1	up	199/516(38%)	Redox regulation:monooxygenase	unclear	1e-104
Zjn_sc00041.1.g02460.1.sm.mkhc	AT1G19250.1	up	196/527(37%)	Redox regulation:monooxygenase	Unclear	4e-96
Zjn_sc00044.1.g03030.1.sm.mk	AT2G46950.1	up	237/542(43%)	Redox regulation:monooxygenase	unclear	1e-125
Zjn_sc00070.1.g00510.1.am.mkhc	AT2G46950.1	down	208/487(42%)	Redox regulation:monooxygenase	unclear	1e-110
Zjn_sc00076.1.g00920.1.am.mk	AT2G45570.1	up	112/191(58%)	Redox regulation:monooxygenase	unclear	4e-63
Zjn_sc00086.1.g01450.1.sm.mkhc	AT2G46950.1	up	202/522(38%)	Redox regulation:monooxygenase	unclear	1e-102
Zjn_sc08435.1.g00010.1.sm.mk	AT2G45570.1	up	60/150(40%)	Redox regulation:monooxygenase	unclear	8e-24
Zjn_sc00008.1.g06880.1.sm.mk	AT3G13390.1	down	159/627(25%)	Redox regulation:oxidoreductase	unclear	5e-48
Zjn_sc00040.1.g03330.1.am.mk	AT3G13390.1	down	350/545(64%)	Redox regulation:oxidoreductase	unclear	0
PB.2145	AT3G32980.1	up	142/321(44%)	Redox regulation:peroxidase	unclear	3e-71
Zjn_sc00002.1.g07410.1.sm.mk	AT1G75280.1	down	121/303(39%)	Redox regulation:reductase	Unclear	7e-57
Zjn_sc00017.1.g03330.1.sm.mkhc	AT1G77490.1	down	234/300(78%)	Redox regulation:ROS	unclear	1e-135
Zjn_sc00043.1.g01260.1.am.mkhc	LOC_Os01g01340.1	down	80/129(62%)	Regulation:Regulatory genes	Unclear	4e-36
Zjn_sc00002.1.g16010.1.sm.mk	AC205250.3_FGT004	down	53/150(35%)	RNA.regulation of transcription.C2H2 zinc finger family	unclear	1e-23
Zjn_sc00026.1.g03800.1.sm.mkhc	AC205250.3_FGT004	down	122/261(46%)	RNA.regulation of transcription.C2H2 zinc finger family	unclear	2e-61
Zjn_sc00026.1.g03820.1.es.mkhc	AC205250.3_FGT004	down	118/258(45%)	RNA.regulation of transcription.C2H2 zinc finger family	unclear	7e-62
Zjn_sc00026.1.g03850.1.es.mkhc	AC205250.3_FGT004	down	91/203(44%)	RNA.regulation of transcription.C2H2 zinc finger family	unclear	8e-44
Zjn_sc00026.1.g03950.1.sm.mkhc	AC205250.3_FGT004	down	385/964(39%)	RNA.regulation of transcription.C2H2 zinc finger family	unclear	1e-180
Zjn_sc00042.1.g01680.1.sm.mkhc	AC205250.3_FGT004	up	157/398(39%)	RNA.regulation of transcription.C2H2 zinc finger family	unclear	4e-75
Zjn_sc00069.1.g02740.1.es.mkhc	AC205250.3_FGT004	up	399/962(41%)	RNA.regulation of transcription.C2H2 zinc finger family	unclear	0
Zjn_sc00086.1.g01180.1.cf.mkhc	AC205250.3_FGT004	up	403/963(41%)	RNA.regulation of transcription.C2H2 zinc finger family	unclear	0
Zjn_sc00065.1.g00810.1.am.mkhc	GRMZM2G009892_T02	up	140/241(58%)	RNA.regulation of transcription.NAC domain transcription factor family	unclear	9e-69
Zjn_sc00004.1.g13780.1.sm.mkhc	GRMZM2G026930_T01	up	142/205(69%)	secondary metabolism.flavonoids.dihydroflavonols	unclear	1e-74
Zjn_sc00009.1.g03910.1.sm.mkhc	GRMZM2G062396_T01	down	561/744(75%)	secondary metabolism.flavonoids.dihydroflavonols	unclear	0
Zjn_sc00011.1.g05300.1.am.mk	GRMZM2G026930_T03	down	146/380(38%)	secondary metabolism.flavonoids.dihydroflavonols	unclear	5e-71
Zjn_sc00026.1.g00600.1.am.mkhc	GRMZM2G029547_T02	up	448/517(86%)	secondary metabolism.flavonoids.dihydroflavonols	unclear	0
Zjn_sc00007.1.g03820.1.sm.mk	GRMZM2G001645_T01	down	59/114 (51%)	secondary metabolism.isoprenoids.mevalonate pathway.HMG-CoA reductase	unclear	2e-24
Zjn_sc00006.1.g04730.1.sm.mkhc	GRMZM2G001645_T01	up	240/401(59%)	secondary metabolism.isoprenoids.mevalonate pathway.HMG-CoA reductase	unclear	1e-113
Zjn_sc00028.1.g02450.1.sm.mkhc	GRMZM2G001645_T02	up	309/392(78%)	secondary metabolism.isoprenoids.mevalonate pathway.HMG-CoA reductase	unclear	0
Zjn_sc00031.1.g01290.1.sm.mkhc	GRMZM2G001645_T02	up	346/444(77%)	secondary metabolism.isoprenoids.mevalonate pathway.HMG-CoA reductase	unclear	0
Zjn_sc00078.1.g01870.1.am.mkhc	GRMZM2G001645_T01	up	95/226(42%)	secondary metabolism.isoprenoids.mevalonate pathway.HMG-CoA reductase	unclear	6e-35
Zjn_sc00090.1.g00250.1.sm.mkhc	GRMZM2G001645_T01	up	269/409(65%)	secondary metabolism.isoprenoids.mevalonate pathway.HMG-CoA reductase	unclear	1e-124
Zjn_sc00205.1.g00380.1.sm.mkhc	GRMZM2G001645_T01	up	102/278(36%)	secondary metabolism.isoprenoids.mevalonate pathway.HMG-CoA reductase	unclear	2e-32
PB.13678	AT2G16430.2	down	277/439(63%)	Signal transduction	unclear	1e-171
PB.13691	AT5G45130.1	up	158/201(78%)	signal transduction	unclear	3e-84
Zjn_sc00001.1.g07370.1.am.mk	AT1G11410.1	up	179/490(36%)	Signal transduction	unclear	1e-80
Zjn_sc00002.1.g02530.1.sm.mk	AT5G44460.1	up	101/181(55%)	Signal transduction	unclear	2e-47
Zjn_sc00002.1.g05130.1.am.mkhc	AT2G30020.1	down	209/405(51%)	Signal transduction	unclear	2e-98
Zjn_sc00002.1.g17190.1.sm.mkhc	AT5G23750.1	up	103/202(50%)	Signal transduction	unclear	6e-48
Zjn_sc00003.1.g07560.1.am.mk	AT2G22860.1	down	36/82(43%)	Signal transduction	unclear	1e-08
Zjn_sc00003.1.g09740.1.am.mkhc	GSMUA_Achr6T10400_001	up	164/213(76%)	Signal transduction	Unclear	2e-91
Zjn_sc00004.1.g01530.1.am.mk	GSMUA_Achr3T05000_001	up	214/256(83%)	Signal transduction	Unclear	1e-127
Zjn_sc00004.1.g02510.1.am.mk	AT4G03290.1	down	73/165(44%)	Signal transduction	unclear	6e-30
Zjn_sc00004.1.g09840.1.am.mkhc	AY032953.1	up	180/611(29%)	Signal transduction	unclear	2e-57
Zjn_sc00007.1.g11360.1.sm.mkhc	AT5G08350.1	up	85/160(53%)	Signal transduction	unclear	1e-46
Zjn_sc00008.1.g01930.1.sm.mkhc	AT1G17240.1	up	200/529(37%)	Signal transduction	unclear	2e-91
Zjn_sc00008.1.g03230.1.sm.mkhc	GSMUA_Achr2T02460_001	up	91/151(60%)	Signal transduction	Unclear	4e-48
Zjn_sc00008.1.g11780.1.am.mk	AT1G11410.1	down	248/618(40%)	Signal transduction	unclear	1e-119
Zjn_sc00008.1.g11790.1.am.mk	AT1G11410.1	down	72/157(45%)	Signal transduction	unclear	1e-34
Zjn_sc00009.1.g00820.1.am.mk	AT1G76640.1	down	75/138(54%)	Signal transduction	unclear	9e-33
Zjn_sc00009.1.g02150.1.am.mk	AT2G14080.1	down	75/264(28%)	Signal transduction	unclear	4e-10
Zjn_sc00011.1.g00880.1.am.mk	GSMUA_Achr6T17050_001	down	54/124(43%)	Signal transduction	Unclear	4e-23
Zjn_sc00011.1.g03990.1.sm.mkhc	GSMUA_Achr9T05970_001	up	42/128(32%)	Signal transduction	Unclear	1e-08
Zjn_sc00011.1.g04970.1.sm.mk	GSMUA_Achr6T04800_001	up	21/45(46%)	Signal transduction	Unclear	1e-07
Zjn_sc00012.1.g09060.1.sm.mkhc	AT4G35860.1	down	60/180(33%)	Signal transduction	unclear	1e-21
Zjn_sc00012.1.g09090.1.sm.mk	AT1G29230.1	up	287/468(61%)	Signal transduction	unclear	1e-159
Zjn_sc00012.1.g10390.1.sm.mk	GSMUA_Achr5T06880_001	up	131/326(40%)	Signal transduction	Unclear	3e-52
Zjn_sc00015.1.g07870.1.am.mkhc	AT3G10300.3	up	125/317(39%)	Signal transduction	unclear	4e-52
Zjn_sc00016.1.g02250.1.sm.mkhc	GSMUA_Achr6T27150_001	up	67/116(57%)	Signal transduction	Unclear	4e-32
Zjn_sc00017.1.g03770.1.am.mk	GSMUA_Achr7T08810_001	up	24/58(41%)	Signal transduction	Unclear	5e-07
Zjn_sc00018.1.g00070.1.am.mkhc	AT1G29800.2	up	83/117(70%)	Signal transduction	unclear	4e-44
Zjn_sc00018.1.g00230.1.am.mk	AT1G29230.1	down	236/469(50%)	Signal transduction	unclear	1e-123
Zjn_sc00018.1.g04420.1.am.mkhc	AT3G14050.1	up	317/450(70%)	Signal transduction	unclear	0
Zjn_sc00018.1.g06750.1.sm.mk	GSMUA_Achr2T21610_001	down	200/442(45%)	Signal transduction	Unclear	5e-87
Zjn_sc00018.1.g07020.1.am.mk	GSMUA_Achr7T21710_001	down	48/111(43%)	Signal transduction	Unclear	6e-17
Zjn_sc00019.1.g02350.1.am.mk	AT1G47510.1	up	104/213(48%)	Signal transduction	unclear	4e-53
Zjn_sc00021.1.g01770.1.am.mk	GSMUA_Achr3T22990_001	up	116/302(38%)	Signal transduction	Unclear	9e-45
Zjn_sc00022.1.g06120.1.am.mk	AT4G35750.1	down	96/202(47%)	Signal transduction	Unclear	5e-54
Zjn_sc00023.1.g01370.1.sm.mkhc	GSMUA_Achr6T00460_001	down	463/889(52%)	Signal transduction	Unclear	0
Zjn_sc00023.1.g02870.1.sm.mkhc	AY032953.1	up	182/492(36%)	Signal transduction	unclear	1e-76
[truncated: 516 more rows]
