# Supplementary material
Source: MDPI journal article supplement (https://www.mdpi.com/2073-4395/13/3/623)
Supplement: s1 [file s1 › Table S5.xlsx]

## Sheet: Sheet1
GO_ID	Term	Term_type	Count	p-value
GO:0052696	flavonoid glucuronidation	biological_process	19	< 1e-30
GO:0009813	flavonoid biosynthetic process	biological_process	20	2.1e-22
GO:0015979	photosynthesis	biological_process	92	6.2e-18
GO:0055114	oxidation-reduction process	biological_process	66	9.2e-12
GO:0018298	protein-chromophore linkage	biological_process	22	1.1e-10
GO:0009765	photosynthesis, light harvesting	biological_process	25	2.7e-10
GO:0015995	chlorophyll biosynthetic process	biological_process	18	2.1e-07
GO:0006355	regulation of transcription, DNA-templated	biological_process	175	2.9e-07
GO:0005975	carbohydrate metabolic process	biological_process	218	3.6e-06
GO:0006996	organelle organization	biological_process	102	2.3e-05
GO:0044249	cellular biosynthetic process	biological_process	482	2.5e-05
GO:0031047	gene silencing by RNA	biological_process	7	3.5e-05
GO:0009690	cytokinin metabolic process	biological_process	10	7.8e-05
GO:0048544	recognition of pollen	biological_process	8	0.0001
GO:0044763	single-organism cellular process	biological_process	631	0.0001
GO:0055085	transmembrane transport	biological_process	57	0.00015
GO:0031408	oxylipin biosynthetic process	biological_process	7	0.00027
GO:0019684	photosynthesis, light reaction	biological_process	47	0.00031
GO:0031330	negative regulation of cellular catabolic process	biological_process	5	0.00044
GO:0006278	RNA-dependent DNA biosynthetic process	biological_process	2	0.00045
GO:0009725	response to hormone	biological_process	97	0.00046
GO:0008610	lipid biosynthetic process	biological_process	57	0.00048
GO:0010207	photosystem II assembly	biological_process	6	0.00051
GO:0042744	hydrogen peroxide catabolic process	biological_process	10	0.00055
GO:0006310	DNA recombination	biological_process	8	0.00058
GO:0009658	chloroplast organization	biological_process	24	0.00083
GO:0042372	phylloquinone biosynthetic process	biological_process	4	0.00084
GO:0010467	gene expression	biological_process	314	0.00096
GO:0044699	single-organism process	biological_process	845	0.00103
GO:0010731	protein glutathionylation	biological_process	2	0.0011
GO:0009651	response to salt stress	biological_process	9	0.00114
GO:0016192	vesicle-mediated transport	biological_process	24	0.00126
GO:0019750	chloroplast localization	biological_process	5	0.00132
GO:0006508	proteolysis	biological_process	32	0.00134
GO:0034645	cellular macromolecule biosynthetic process	biological_process	312	0.00135
GO:0043101	purine-containing compound salvage	biological_process	4	0.00162
GO:0015991	ATP hydrolysis coupled proton transport	biological_process	1	0.00172
GO:0005992	trehalose biosynthetic process	biological_process	13	0.00178
GO:0001101	response to acid chemical	biological_process	58	0.00192
GO:0006486	protein glycosylation	biological_process	10	0.00199
GO:0009058	biosynthetic process	biological_process	547	0.0021
GO:0016482	cytosolic transport	biological_process	17	0.00211
GO:0019252	starch biosynthetic process	biological_process	11	0.00212
GO:0045892	negative regulation of transcription, DNA-templated	biological_process	8	0.00223
GO:0006812	cation transport	biological_process	40	0.00237
GO:0045165	cell fate commitment	biological_process	3	0.00283
GO:0044281	small molecule metabolic process	biological_process	213	0.00287
GO:0016070	RNA metabolic process	biological_process	271	0.003
GO:0009141	nucleoside triphosphate metabolic process	biological_process	15	0.00306
GO:0043174	nucleoside salvage	biological_process	2	0.00315
GO:0009116	nucleoside metabolic process	biological_process	28	0.00316
GO:0007006	mitochondrial membrane organization	biological_process	4	0.00319
GO:0046129	purine ribonucleoside biosynthetic process	biological_process	11	0.00333
GO:1901135	carbohydrate derivative metabolic process	biological_process	69	0.00338
GO:1901361	organic cyclic compound catabolic process	biological_process	33	0.00346
GO:0046486	glycerolipid metabolic process	biological_process	19	0.00352
GO:0043412	macromolecule modification	biological_process	139	0.00357
GO:0009657	plastid organization	biological_process	29	0.00357
GO:0009740	gibberellic acid mediated signaling pathway	biological_process	2	0.00361
GO:0009260	ribonucleotide biosynthetic process	biological_process	20	0.00364
GO:0009736	cytokinin-activated signaling pathway	biological_process	3	0.00379
GO:0009903	chloroplast avoidance movement	biological_process	4	0.00388
GO:0043624	cellular protein complex disassembly	biological_process	5	0.00391
GO:0030418	nicotianamine biosynthetic process	biological_process	1	0.00417
GO:0017038	protein import	biological_process	6	0.00419
GO:0050794	regulation of cellular process	biological_process	306	0.00428
GO:0044712	single-organism catabolic process	biological_process	85	0.00431
GO:0009234	menaquinone biosynthetic process	biological_process	3	0.00432
GO:0009697	salicylic acid biosynthetic process	biological_process	4	0.00437
GO:0000105	histidine biosynthetic process	biological_process	1	0.0044
GO:0061640	cytoskeleton-dependent cytokinesis	biological_process	7	0.00468
GO:0030154	cell differentiation	biological_process	29	0.00478
GO:0009904	chloroplast accumulation movement	biological_process	3	0.0048
GO:0007049	cell cycle	biological_process	25	0.00489
GO:0044765	single-organism transport	biological_process	160	0.0049
GO:0009738	abscisic acid-activated signaling pathway	biological_process	14	0.00495
GO:0009734	auxin-activated signaling pathway	biological_process	24	0.00501
GO:0048731	system development	biological_process	62	0.00511
GO:0071491	cellular response to red light	biological_process	3	0.00512
GO:0071702	organic substance transport	biological_process	92	0.00516
GO:0009768	photosynthesis, light harvesting in photosystem I	biological_process	4	0.0052
GO:0007017	microtubule-based process	biological_process	25	0.00553
GO:0015031	protein transport	biological_process	45	0.00582
GO:0009408	response to heat	biological_process	18	0.00583
GO:0006886	intracellular protein transport	biological_process	27	0.00593
GO:0072594	establishment of protein localization to organelle	biological_process	11	0.00609
GO:0009785	blue light signaling pathway	biological_process	3	0.00609
GO:0048518	positive regulation of biological process	biological_process	55	0.0061
GO:0019748	secondary metabolic process	biological_process	18	0.00612
GO:1901701	cellular response to oxygen-containing compound	biological_process	43	0.00614
GO:0006605	protein targeting	biological_process	13	0.00627
GO:0019439	aromatic compound catabolic process	biological_process	32	0.00629
GO:0009150	purine ribonucleotide metabolic process	biological_process	22	0.00649
GO:0009124	nucleoside monophosphate biosynthetic process	biological_process	14	0.00651
GO:0006644	phospholipid metabolic process	biological_process	20	0.00663
GO:0071705	nitrogen compound transport	biological_process	26	0.00675
GO:1901565	organonitrogen compound catabolic process	biological_process	42	0.00681
GO:0046434	organophosphate catabolic process	biological_process	7	0.00686
GO:0044267	cellular protein metabolic process	biological_process	204	0.0069
GO:0006094	gluconeogenesis	biological_process	3	0.00717
GO:0098656	anion transmembrane transport	biological_process	7	0.00723
GO:0071215	cellular response to abscisic acid stimulus	biological_process	15	0.00728
GO:0017157	regulation of exocytosis	biological_process	1	0.00748
GO:0019941	modification-dependent protein catabolic process	biological_process	13	0.00752
GO:0000398	mRNA splicing, via spliceosome	biological_process	7	0.00765
GO:0015977	carbon fixation	biological_process	7	0.00767
GO:0065002	intracellular protein transmembrane transport	biological_process	5	0.00778
GO:0009084	glutamine family amino acid biosynthetic process	biological_process	6	0.00801
GO:0048564	photosystem I assembly	biological_process	3	0.00826
GO:0046856	phosphatidylinositol dephosphorylation	biological_process	6	0.00849
GO:0045454	cell redox homeostasis	biological_process	6	0.00865
GO:0048653	anther development	biological_process	3	0.00875
GO:0006412	translation	biological_process	75	0.00883
GO:0016043	cellular component organization	biological_process	167	0.00886
GO:0090056	regulation of chlorophyll metabolic process	biological_process	6	0.00903
GO:0009416	response to light stimulus	biological_process	37	0.00907
GO:0006461	protein complex assembly	biological_process	24	0.00931
GO:0010035	response to inorganic substance	biological_process	38	0.00938
GO:0071407	cellular response to organic cyclic compound	biological_process	13	0.00945
GO:0008655	pyrimidine-containing compound salvage	biological_process	3	0.00951
GO:0009168	purine ribonucleoside monophosphate biosynthetic process	biological_process	12	0.00975
GO:2000278	regulation of DNA biosynthetic process	biological_process	1	0.00988
GO:1902589	single-organism organelle organization	biological_process	50	0.00988
GO:0009113	purine nucleobase biosynthetic process	biological_process	2	0.0102
GO:0006511	ubiquitin-dependent protein catabolic process	biological_process	13	0.01032
GO:1900140	regulation of seedling development	biological_process	6	0.01044
GO:0009200	deoxyribonucleoside triphosphate metabolic process	biological_process	1	0.01055
GO:0006066	alcohol metabolic process	biological_process	19	0.01086
GO:0000003	reproduction	biological_process	32	0.01093
GO:0072657	protein localization to membrane	biological_process	7	0.01096
GO:0071229	cellular response to acid chemical	biological_process	26	0.01102
GO:0072330	monocarboxylic acid biosynthetic process	biological_process	31	0.01102
GO:1902582	single-organism intracellular transport	biological_process	27	0.01121
GO:0006275	regulation of DNA replication	biological_process	1	0.01134
GO:0019953	sexual reproduction	biological_process	3	0.01138
GO:0042439	ethanolamine-containing compound metabolic process	biological_process	7	0.01147
GO:1901420	negative regulation of response to alcohol	biological_process	5	0.01167
GO:0044743	protein transmembrane import into intracellular organelle	biological_process	5	0.01167
GO:0007005	mitochondrion organization	biological_process	10	0.01174
GO:0015849	organic acid transport	biological_process	9	0.01215
GO:0046942	carboxylic acid transport	biological_process	9	0.01215
GO:0046470	phosphatidylcholine metabolic process	biological_process	7	0.0122
GO:0016143	S-glycoside metabolic process	biological_process	3	0.01223
GO:0019760	glucosinolate metabolic process	biological_process	3	0.01223
GO:0019757	glycosinolate metabolic process	biological_process	3	0.01223
GO:1901576	organic substance biosynthetic process	biological_process	513	0.01227
GO:0051223	regulation of protein transport	biological_process	2	0.01245
GO:0005983	starch catabolic process	biological_process	4	0.01253
GO:0009199	ribonucleoside triphosphate metabolic process	biological_process	14	0.01274
GO:0006979	response to oxidative stress	biological_process	26	0.01319
GO:0009691	cytokinin biosynthetic process	biological_process	4	0.0133
GO:0006415	translational termination	biological_process	1	0.01344
GO:0009119	ribonucleoside metabolic process	biological_process	23	0.01348
GO:0071669	plant-type cell wall organization or biogenesis	biological_process	11	0.01387
GO:0010029	regulation of seed germination	biological_process	6	0.01388
GO:0090151	establishment of protein localization to mitochondrial membrane	biological_process	3	0.01401
GO:0015711	organic anion transport	biological_process	14	0.01415
GO:0042455	ribonucleoside biosynthetic process	biological_process	15	0.01417
GO:0009664	plant-type cell wall organization	biological_process	7	0.0143
GO:0034655	nucleobase-containing compound catabolic process	biological_process	14	0.01432
GO:0048468	cell development	biological_process	18	0.01439
GO:0009773	photosynthetic electron transport in photosystem I	biological_process	6	0.0144
GO:0008272	sulfate transport	biological_process	3	0.01443
GO:0010498	proteasomal protein catabolic process	biological_process	9	0.01485
GO:0006396	RNA processing	biological_process	44	0.01485
GO:0006265	DNA topological change	biological_process	1	0.01494
GO:0005977	glycogen metabolic process	biological_process	9	0.01511
GO:0006112	energy reserve metabolic process	biological_process	9	0.01511
GO:0043648	dicarboxylic acid metabolic process	biological_process	12	0.01526
GO:1903046	meiotic cell cycle process	biological_process	6	0.01566
GO:0048367	shoot system development	biological_process	28	0.01593
GO:0052542	defense response by callose deposition	biological_process	1	0.01596
GO:0052545	callose localization	biological_process	1	0.01596
GO:0033037	polysaccharide localization	biological_process	1	0.01596
GO:0090087	regulation of peptide transport	biological_process	2	0.01613
GO:0009788	negative regulation of abscisic acid-activated signaling pathway	biological_process	3	0.01614
GO:0070585	protein localization to mitochondrion	biological_process	4	0.01624
GO:0072655	establishment of protein localization to mitochondrion	biological_process	4	0.01624
GO:0006626	protein targeting to mitochondrion	biological_process	4	0.01624
GO:0009554	megasporogenesis	biological_process	1	0.01626
GO:1990066	energy quenching	biological_process	2	0.01636
GO:0010196	nonphotochemical quenching	biological_process	2	0.01636
GO:0019253	reductive pentose-phosphate cycle	biological_process	1	0.01643
GO:0019685	photosynthesis, dark reaction	biological_process	1	0.01643
GO:0015833	peptide transport	biological_process	17	0.01654
GO:0042886	amide transport	biological_process	17	0.01654
GO:0009152	purine ribonucleotide biosynthetic process	biological_process	16	0.01658
GO:2000008	regulation of protein localization to cell surface	biological_process	1	0.01659
GO:0006305	DNA alkylation	biological_process	2	0.01677
GO:0006306	DNA methylation	biological_process	2	0.01677
GO:0061024	membrane organization	biological_process	17	0.01686
GO:0016559	peroxisome fission	biological_process	5	0.01696
GO:0008299	isoprenoid biosynthetic process	biological_process	17	0.01703
GO:0008544	epidermis development	biological_process	9	0.01713
GO:0043588	skin development	biological_process	9	0.01713
GO:0046112	nucleobase biosynthetic process	biological_process	3	0.01714
GO:0071554	cell wall organization or biogenesis	biological_process	42	0.01717
GO:0019740	nitrogen utilization	biological_process	3	0.01726
GO:0009733	response to auxin	biological_process	39	0.01726
GO:0090150	establishment of protein localization to membrane	biological_process	7	0.01748
GO:0009767	photosynthetic electron transport chain	biological_process	9	0.01754
GO:0034248	regulation of cellular amide metabolic process	biological_process	3	0.01773
GO:0006811	ion transport	biological_process	61	0.01774
GO:0003006	developmental process involved in reproduction	biological_process	43	0.01777
GO:0006434	seryl-tRNA aminoacylation	biological_process	1	0.01788
GO:0044270	cellular nitrogen compound catabolic process	biological_process	22	0.01802
GO:0071395	cellular response to jasmonic acid stimulus	biological_process	9	0.01805
GO:0009867	jasmonic acid mediated signaling pathway	biological_process	9	0.01805
GO:0006091	generation of precursor metabolites and energy	biological_process	74	0.01813
GO:0045229	external encapsulating structure organization	biological_process	31	0.0182
GO:0043161	proteasome-mediated ubiquitin-dependent protein catabolic process	biological_process	8	0.01848
GO:0048584	positive regulation of response to stimulus	biological_process	7	0.0186
GO:0006536	glutamate metabolic process	biological_process	7	0.01865
GO:0044710	single-organism metabolic process	biological_process	487	0.01872
GO:0048522	positive regulation of cellular process	biological_process	45	0.01878
GO:0009653	anatomical structure morphogenesis	biological_process	30	0.01895
GO:0036211	protein modification process	biological_process	99	0.01927
GO:0006464	cellular protein modification process	biological_process	99	0.01927
GO:0051704	multi-organism process	biological_process	61	0.01944
GO:0048366	leaf development	biological_process	10	0.01946
GO:0009064	glutamine family amino acid metabolic process	biological_process	20	0.01964
GO:0032543	mitochondrial translation	biological_process	3	0.01985
GO:0031119	tRNA pseudouridine synthesis	biological_process	1	0.01998
GO:0009112	nucleobase metabolic process	biological_process	4	0.02012
GO:0007007	inner mitochondrial membrane organization	biological_process	3	0.02019
GO:0009204	deoxyribonucleoside triphosphate catabolic process	biological_process	1	0.02023
GO:0051222	positive regulation of protein transport	biological_process	2	0.02066
GO:0044724	single-organism carbohydrate catabolic process	biological_process	22	0.02092
GO:0046395	carboxylic acid catabolic process	biological_process	18	0.02099
GO:0016054	organic acid catabolic process	biological_process	18	0.02099
GO:0044283	small molecule biosynthetic process	biological_process	68	0.02109
GO:0046700	heterocycle catabolic process	biological_process	22	0.02125
GO:0051972	regulation of telomerase activity	biological_process	1	0.02133
GO:0051973	positive regulation of telomerase activity	biological_process	1	0.02133
GO:2000573	positive regulation of DNA biosynthetic process	biological_process	1	0.02133
GO:0006892	post-Golgi vesicle-mediated transport	biological_process	1	0.02147
GO:0010117	photoprotection	biological_process	3	0.02154
GO:0070201	regulation of establishment of protein localization	biological_process	2	0.02155
GO:0009902	chloroplast relocation	biological_process	7	0.02162
GO:0051667	establishment of plastid localization	biological_process	7	0.02162
GO:0042549	photosystem II stabilization	biological_process	2	0.02166
GO:0051171	regulation of nitrogen compound metabolic process	biological_process	202	0.02175
GO:1901615	organic hydroxy compound metabolic process	biological_process	28	0.02177
GO:1902358	sulfate transmembrane transport	biological_process	1	0.0218
GO:0032870	cellular response to hormone stimulus	biological_process	57	0.02201
GO:0044728	DNA methylation or demethylation	biological_process	2	0.02204
GO:0009913	epidermal cell differentiation	biological_process	9	0.02207
GO:0046134	pyrimidine nucleoside biosynthetic process	biological_process	7	0.02229
GO:1901292	nucleoside phosphate catabolic process	biological_process	5	0.02239
GO:0006560	proline metabolic process	biological_process	1	0.02262
GO:0010016	shoot system morphogenesis	biological_process	4	0.02267
GO:0072507	divalent inorganic cation homeostasis	biological_process	2	0.02268
GO:0006304	DNA modification	biological_process	2	0.02272
GO:0048193	Golgi vesicle transport	biological_process	5	0.02275
GO:0009636	response to toxic substance	biological_process	10	0.02283
GO:0034654	nucleobase-containing compound biosynthetic process	biological_process	225	0.02289
GO:0046686	response to cadmium ion	biological_process	4	0.02298
GO:0033036	macromolecule localization	biological_process	70	0.02305
GO:0034622	cellular macromolecular complex assembly	biological_process	25	0.02309
GO:0030001	metal ion transport	biological_process	31	0.02309
GO:0097305	response to alcohol	biological_process	31	0.02334
GO:0043623	cellular protein complex assembly	biological_process	19	0.02352
GO:0009132	nucleoside diphosphate metabolic process	biological_process	1	0.02357
GO:0018130	heterocycle biosynthetic process	biological_process	261	0.02431
GO:0048513	animal organ development	biological_process	34	0.02446
GO:0006333	chromatin assembly or disassembly	biological_process	1	0.02459
GO:0071555	cell wall organization	biological_process	31	0.02488
GO:0003002	regionalization	biological_process	7	0.02505
GO:0009057	macromolecule catabolic process	biological_process	49	0.02526
GO:0009404	toxin metabolic process	biological_process	1	0.02529
GO:0022414	reproductive process	biological_process	55	0.02533
GO:0051195	negative regulation of cofactor metabolic process	biological_process	2	0.02558
GO:1901402	negative regulation of tetrapyrrole metabolic process	biological_process	2	0.02558
GO:1901405	negative regulation of tetrapyrrole catabolic process	biological_process	2	0.02558
GO:0030029	actin filament-based process	biological_process	21	0.02567
GO:0006796	phosphate-containing compound metabolic process	biological_process	104	0.02587
GO:0044711	single-organism biosynthetic process	biological_process	204	0.02641
GO:0018958	phenol-containing compound metabolic process	biological_process	6	0.02645
GO:1901888	regulation of cell junction assembly	biological_process	2	0.02721
GO:1901889	negative regulation of cell junction assembly	biological_process	2	0.02721
GO:0010810	regulation of cell-substrate adhesion	biological_process	2	0.02721
GO:0010812	negative regulation of cell-substrate adhesion	biological_process	2	0.02721
GO:0010595	positive regulation of endothelial cell migration	biological_process	2	0.02721
GO:0007044	cell-substrate junction assembly	biological_process	2	0.02721
GO:0007045	cell-substrate adherens junction assembly	biological_process	2	0.02721
GO:0010634	positive regulation of epithelial cell migration	biological_process	2	0.02721
GO:0071391	cellular response to estrogen stimulus	biological_process	2	0.02721
GO:0060491	regulation of cell projection assembly	biological_process	2	0.02721
GO:0001952	regulation of cell-matrix adhesion	biological_process	2	0.02721
GO:0001953	negative regulation of cell-matrix adhesion	biological_process	2	0.02721
GO:0051491	positive regulation of filopodium assembly	biological_process	2	0.02721
GO:0051489	regulation of filopodium assembly	biological_process	2	0.02721
GO:1903391	regulation of adherens junction organization	biological_process	2	0.02721
GO:1903392	negative regulation of adherens junction organization	biological_process	2	0.02721
GO:0007160	cell-matrix adhesion	biological_process	2	0.02721
GO:0007162	negative regulation of cell adhesion	biological_process	2	0.02721
GO:0051893	regulation of focal adhesion assembly	biological_process	2	0.02721
GO:0051895	negative regulation of focal adhesion assembly	biological_process	2	0.02721
GO:0031589	cell-substrate adhesion	biological_process	2	0.02721
GO:0031532	actin cytoskeleton reorganization	biological_process	2	0.02721
GO:2000114	regulation of establishment of cell polarity	biological_process	2	0.02721
GO:0034260	negative regulation of GTPase activity	biological_process	2	0.02721
GO:2000251	positive regulation of actin cytoskeleton reorganization	biological_process	2	0.02721
GO:2000249	regulation of actin cytoskeleton reorganization	biological_process	2	0.02721
GO:0090109	regulation of cell-substrate junction assembly	biological_process	2	0.02721
GO:0048041	focal adhesion assembly	biological_process	2	0.02721
GO:0008643	carbohydrate transport	biological_process	14	0.02745
GO:0006260	DNA replication	biological_process	6	0.02794
GO:0046460	neutral lipid biosynthetic process	biological_process	3	0.02797
GO:0046463	acylglycerol biosynthetic process	biological_process	3	0.02797
GO:0006638	neutral lipid metabolic process	biological_process	3	0.02797
GO:0006639	acylglycerol metabolic process	biological_process	3	0.02797
GO:0009142	nucleoside triphosphate biosynthetic process	biological_process	11	0.028
GO:0006542	glutamine biosynthetic process	biological_process	3	0.02815
GO:0009129	pyrimidine nucleoside monophosphate metabolic process	biological_process	1	0.02818
GO:0009130	pyrimidine nucleoside monophosphate biosynthetic process	biological_process	1	0.02818
GO:1901136	carbohydrate derivative catabolic process	biological_process	13	0.0282
GO:0065004	protein-DNA complex assembly	biological_process	1	0.0282
GO:0032774	RNA biosynthetic process	biological_process	196	0.02823
GO:0009220	pyrimidine ribonucleotide biosynthetic process	biological_process	6	0.02832
GO:0009218	pyrimidine ribonucleotide metabolic process	biological_process	6	0.02832
GO:0009751	response to salicylic acid	biological_process	6	0.02873
GO:0031329	regulation of cellular catabolic process	biological_process	9	0.02889
GO:0006400	tRNA modification	biological_process	7	0.029
GO:0044265	cellular macromolecule catabolic process	biological_process	25	0.02913
GO:0006082	organic acid metabolic process	biological_process	143	0.02941
GO:0045934	negative regulation of nucleobase-containing compound metabolic process	biological_process	17	0.02942
GO:0030855	epithelial cell differentiation	biological_process	9	0.02956
GO:0051301	cell division	biological_process	21	0.02982
GO:0009147	pyrimidine nucleoside triphosphate metabolic process	biological_process	6	0.02984
GO:0022402	cell cycle process	biological_process	19	0.02996
GO:0009308	amine metabolic process	biological_process	28	0.03003
GO:0000103	sulfate assimilation	biological_process	3	0.03007
GO:0006067	ethanol metabolic process	biological_process	2	0.03017
GO:0006069	ethanol oxidation	biological_process	2	0.03017
GO:0070681	glutaminyl-tRNAGln biosynthesis via transamidation	biological_process	3	0.03021
GO:0009607	response to biotic stimulus	biological_process	48	0.03033
GO:0009156	ribonucleoside monophosphate biosynthetic process	biological_process	13	0.03036
GO:0010026	trichome differentiation	biological_process	8	0.03043
GO:0009615	response to virus	biological_process	2	0.03054
GO:0006568	tryptophan metabolic process	biological_process	5	0.03058
GO:0006586	indolalkylamine metabolic process	biological_process	5	0.03058
GO:0009185	ribonucleoside diphosphate metabolic process	biological_process	1	0.03059
GO:0048608	reproductive structure development	biological_process	37	0.03062
GO:0061458	reproductive system development	biological_process	37	0.03062
GO:0051276	chromosome organization	biological_process	9	0.03075
GO:0010103	stomatal complex morphogenesis	biological_process	2	0.03084
GO:0043331	response to dsRNA	biological_process	2	0.03089
GO:0010623	programmed cell death involved in cell development	biological_process	2	0.03111
GO:0009166	nucleotide catabolic process	biological_process	5	0.03118
GO:0006006	glucose metabolic process	biological_process	12	0.03125
GO:0032956	regulation of actin cytoskeleton organization	biological_process	8	0.03127
GO:0032970	regulation of actin filament-based process	biological_process	8	0.03127
GO:0019438	aromatic compound biosynthetic process	biological_process	266	0.0314
GO:0006334	nucleosome assembly	biological_process	1	0.03148
GO:0030036	actin cytoskeleton organization	biological_process	20	0.0315
GO:2000033	regulation of seed dormancy process	biological_process	1	0.03153
GO:2000034	regulation of seed maturation	biological_process	1	0.03153
GO:0006650	glycerophospholipid metabolic process	biological_process	15	0.03168
GO:0051050	positive regulation of transport	biological_process	2	0.03171
GO:0097237	cellular response to toxic substance	biological_process	3	0.0318
GO:0006839	mitochondrial transport	biological_process	7	0.03182
GO:0007154	cell communication	biological_process	124	0.03199
GO:2001025	positive regulation of response to drug	biological_process	2	0.03246
GO:2001040	positive regulation of cellular response to drug	biological_process	2	0.03246
GO:0080151	positive regulation of salicylic acid mediated signaling pathway	biological_process	2	0.03246
GO:0048827	phyllome development	biological_process	16	0.03279
GO:0015698	inorganic anion transport	biological_process	8	0.03287
GO:0043436	oxoacid metabolic process	biological_process	142	0.0329
GO:0009755	hormone-mediated signaling pathway	biological_process	52	0.03305
GO:0009861	jasmonic acid and ethylene-dependent systemic resistance	biological_process	1	0.03309
GO:0006808	regulation of nitrogen utilization	biological_process	3	0.03337
GO:0006820	anion transport	biological_process	22	0.03362
GO:0019932	second-messenger-mediated signaling	biological_process	1	0.03393
GO:0010258	NADH dehydrogenase complex (plastoquinone) assembly	biological_process	2	0.03394
GO:0016197	endosomal transport	biological_process	4	0.03412
GO:0051607	defense response to virus	biological_process	2	0.03425
GO:0090407	organophosphate biosynthetic process	biological_process	33	0.03433
GO:0010441	guard cell development	biological_process	2	0.03451
GO:0010442	guard cell morphogenesis	biological_process	2	0.03451
GO:0009143	nucleoside triphosphate catabolic process	biological_process	4	0.03457
GO:0002943	tRNA dihydrouridine synthesis	biological_process	1	0.03459
GO:0071490	cellular response to far red light	biological_process	3	0.03465
GO:0071492	cellular response to UV-A	biological_process	3	0.03465
GO:0071486	cellular response to high light intensity	biological_process	3	0.03465
GO:0070141	response to UV-A	biological_process	3	0.03465
GO:0034644	cellular response to UV	biological_process	3	0.03481
GO:0080183	response to photooxidative stress	biological_process	1	0.03499
GO:0046854	phosphatidylinositol phosphorylation	biological_process	1	0.03503
GO:0046834	lipid phosphorylation	biological_process	1	0.03503
GO:0051253	negative regulation of RNA metabolic process	biological_process	17	0.03537
GO:0009201	ribonucleoside triphosphate biosynthetic process	biological_process	11	0.03566
GO:0055088	lipid homeostasis	biological_process	5	0.03567
GO:0009791	post-embryonic development	biological_process	53	0.03598
GO:0050832	defense response to fungus	biological_process	22	0.03601
GO:0009620	response to fungus	biological_process	25	0.03627
GO:0007231	osmosensory signaling pathway	biological_process	2	0.03632
GO:0072348	sulfur compound transport	biological_process	3	0.03635
GO:0009149	pyrimidine nucleoside triphosphate catabolic process	biological_process	1	0.03675
GO:0009211	pyrimidine deoxyribonucleoside triphosphate metabolic process	biological_process	1	0.03675
GO:0009213	pyrimidine deoxyribonucleoside triphosphate catabolic process	biological_process	1	0.03675
GO:0071495	cellular response to endogenous stimulus	biological_process	60	0.03689
GO:0032880	regulation of protein localization	biological_process	3	0.03691
GO:0043489	RNA stabilization	biological_process	3	0.037
GO:1902369	negative regulation of RNA catabolic process	biological_process	3	0.037
GO:0071214	cellular response to abiotic stimulus	biological_process	10	0.03715
GO:0019752	carboxylic acid metabolic process	biological_process	139	0.03734
GO:0031118	rRNA pseudouridine synthesis	biological_process	2	0.03734
GO:0006164	purine nucleotide biosynthetic process	biological_process	16	0.03764
GO:0009696	salicylic acid metabolic process	biological_process	5	0.03805
GO:0071324	cellular response to disaccharide stimulus	biological_process	2	0.03812
GO:0071329	cellular response to sucrose stimulus	biological_process	2	0.03812
GO:1901404	regulation of tetrapyrrole catabolic process	biological_process	2	0.03812
GO:0010271	regulation of chlorophyll catabolic process	biological_process	2	0.03812
GO:0009753	response to jasmonic acid	biological_process	13	0.03813
GO:0044723	single-organism carbohydrate metabolic process	biological_process	119	0.03885
GO:0009639	response to red or far red light	biological_process	7	0.03894
GO:0044208	'de novo' AMP biosynthetic process	biological_process	1	0.03923
GO:0046033	AMP metabolic process	biological_process	1	0.03923
GO:0006167	AMP biosynthetic process	biological_process	1	0.03923
GO:0009401	phosphoenolpyruvate-dependent sugar phosphotransferase system	biological_process	1	0.0394
GO:0016246	RNA interference	biological_process	2	0.03948
GO:0030422	production of siRNA involved in RNA interference	biological_process	2	0.03948
GO:0071103	DNA conformation change	biological_process	3	0.03972
GO:0031221	arabinan metabolic process	biological_process	1	0.04001
GO:0031222	arabinan catabolic process	biological_process	1	0.04001
GO:0031497	chromatin assembly	biological_process	1	0.04008
GO:0006576	cellular biogenic amine metabolic process	biological_process	16	0.04016
GO:0046271	phenylpropanoid catabolic process	biological_process	5	0.04054
GO:0048364	root development	biological_process	14	0.04063
GO:0022622	root system development	biological_process	14	0.04063
GO:0043097	pyrimidine nucleoside salvage	biological_process	2	0.04074
GO:0045944	positive regulation of transcription from RNA polymerase II promoter	biological_process	9	0.04076
GO:0051130	positive regulation of cellular component organization	biological_process	7	0.04076
GO:0044282	small molecule catabolic process	biological_process	20	0.04138
GO:0032506	cytokinetic process	biological_process	1	0.04207
GO:0098661	inorganic anion transmembrane transport	biological_process	4	0.0421
GO:0045017	glycerolipid biosynthetic process	biological_process	8	0.04226
GO:0046847	filopodium assembly	biological_process	2	0.04277
GO:0044702	single organism reproductive process	biological_process	41	0.04281
GO:0034389	lipid particle organization	biological_process	2	0.04287
GO:0016052	carbohydrate catabolic process	biological_process	34	0.04304
GO:0046049	UMP metabolic process	biological_process	1	0.04311
GO:0006222	UMP biosynthetic process	biological_process	1	0.04311
GO:0009173	pyrimidine ribonucleoside monophosphate metabolic process	biological_process	1	0.04311
GO:0009174	pyrimidine ribonucleoside monophosphate biosynthetic process	biological_process	1	0.04311
GO:1901575	organic substance catabolic process	biological_process	118	0.04321
GO:0031050	dsRNA fragmentation	biological_process	2	0.04341
GO:0070918	production of small RNA involved in gene silencing by RNA	biological_process	2	0.04341
GO:0071359	cellular response to dsRNA	biological_process	2	0.04341
GO:0044087	regulation of cellular component biogenesis	biological_process	8	0.04345
GO:0006351	transcription, DNA-templated	biological_process	189	0.04376
GO:0000422	autophagy of mitochondrion	biological_process	6	0.04429
GO:0080167	response to karrikin	biological_process	10	0.04432
GO:0006450	regulation of translational fidelity	biological_process	2	0.04462
GO:0031328	positive regulation of cellular biosynthetic process	biological_process	29	0.04473
GO:0009415	response to water	biological_process	16	0.04473
GO:0042493	response to drug	biological_process	12	0.04516
GO:0055048	anastral spindle assembly	biological_process	1	0.04517
GO:0009971	anastral spindle assembly involved in male meiosis	biological_process	1	0.04517
GO:0007053	spindle assembly involved in male meiosis	biological_process	1	0.04517
GO:0098660	inorganic ion transmembrane transport	biological_process	14	0.04521
GO:0010025	wax biosynthetic process	biological_process	1	0.04526
GO:0010166	wax metabolic process	biological_process	1	0.04526
GO:0009144	purine nucleoside triphosphate metabolic process	biological_process	11	0.04561
GO:0009205	purine ribonucleoside triphosphate metabolic process	biological_process	11	0.04561
GO:0010090	trichome morphogenesis	biological_process	5	0.04613
GO:0023051	regulation of signaling	biological_process	16	0.04632
GO:0046168	glycerol-3-phosphate catabolic process	biological_process	2	0.04639
GO:0007389	pattern specification process	biological_process	8	0.04652
GO:1901362	organic cyclic compound biosynthetic process	biological_process	275	0.04675
GO:0010557	positive regulation of macromolecule biosynthetic process	biological_process	28	0.04688
GO:0009163	nucleoside biosynthetic process	biological_process	16	0.04714
GO:0048832	specification of plant organ number	biological_process	1	0.04752
GO:0048833	specification of floral organ number	biological_process	1	0.04752
GO:0032509	endosome transport via multivesicular body sorting pathway	biological_process	3	0.04767
GO:0015976	carbon utilization	biological_process	4	0.048
GO:0048856	anatomical structure development	biological_process	90	0.04807
GO:0036003	positive regulation of transcription from RNA polymerase II promoter in response to stress	biological_process	1	0.04822
GO:0051321	meiotic cell cycle	biological_process	9	0.04829
GO:0007568	aging	biological_process	6	0.04829
GO:0018175	protein nucleotidylation	biological_process	3	0.04884
GO:0018177	protein uridylylation	biological_process	3	0.04884
GO:0090293	nitrogen catabolite regulation of transcription	biological_process	3	0.04884
GO:0046274	lignin catabolic process	biological_process	5	0.04906
GO:0033157	regulation of intracellular protein transport	biological_process	2	0.04924
GO:0090558	plant epidermis development	biological_process	8	0.0493
GO:0009262	deoxyribonucleotide metabolic process	biological_process	2	0.04947
GO:1902580	single-organism cellular localization	biological_process	8	0.04955
GO:1902578	single-organism localization	biological_process	8	0.04955
GO:0051726	regulation of cell cycle	biological_process	8	0.04965
GO:0032502	developmental process	biological_process	106	0.0502
GO:0002229	defense response to oomycetes	biological_process	3	0.05057
GO:0002239	response to oomycetes	biological_process	3	0.05057
GO:0055081	anion homeostasis	biological_process	2	0.05094
GO:0046128	purine ribonucleoside metabolic process	biological_process	18	0.0514
GO:0032204	regulation of telomere maintenance	biological_process	1	0.05193
GO:0046034	ATP metabolic process	biological_process	6	0.05207
GO:0032787	monocarboxylic acid metabolic process	biological_process	73	0.05253
GO:0015740	C4-dicarboxylate transport	biological_process	2	0.05298
GO:0015743	malate transport	biological_process	2	0.05298
GO:0006835	dicarboxylic acid transport	biological_process	2	0.05298
GO:0006106	fumarate metabolic process	biological_process	1	0.0535
GO:0005978	glycogen biosynthetic process	biological_process	7	0.05359
GO:0051173	positive regulation of nitrogen compound metabolic process	biological_process	32	0.05368
GO:0006893	Golgi to plasma membrane transport	biological_process	1	0.05385
GO:1901606	alpha-amino acid catabolic process	biological_process	11	0.05401
GO:0010646	regulation of cell communication	biological_process	16	0.05407
GO:1901700	response to oxygen-containing compound	biological_process	80	0.05455
GO:0009966	regulation of signal transduction	biological_process	16	0.05472
GO:0044248	cellular catabolic process	biological_process	92	0.05491
GO:0009074	aromatic amino acid family catabolic process	biological_process	8	0.05512
GO:0009808	lignin metabolic process	biological_process	7	0.05518
GO:0009612	response to mechanical stimulus	biological_process	1	0.05556
GO:0007050	cell cycle arrest	biological_process	1	0.05566
GO:0032388	positive regulation of intracellular transport	biological_process	2	0.05641
GO:0035194	posttranscriptional gene silencing by RNA	biological_process	3	0.05679
GO:0060429	epithelium development	biological_process	10	0.05694
GO:0042793	transcription from plastid promoter	biological_process	3	0.05718
GO:0046132	pyrimidine ribonucleoside biosynthetic process	biological_process	6	0.0573
GO:0008645	hexose transport	biological_process	6	0.05751
GO:0015758	glucose transport	biological_process	6	0.05751
GO:0015749	monosaccharide transport	biological_process	6	0.05751
GO:0046323	glucose import	biological_process	6	0.05751
GO:0034497	protein localization to pre-autophagosomal structure	biological_process	4	0.05766
GO:0071483	cellular response to blue light	biological_process	6	0.05783
GO:0009085	lysine biosynthetic process	biological_process	1	0.05856
GO:0009089	lysine biosynthetic process via diaminopimelate	biological_process	1	0.05856
GO:0046451	diaminopimelate metabolic process	biological_process	1	0.05856
GO:0006553	lysine metabolic process	biological_process	1	0.05856
GO:0022412	cellular process involved in reproduction in multicellular organism	biological_process	3	0.05858
GO:0016310	phosphorylation	biological_process	31	0.05881
GO:0051716	cellular response to stimulus	biological_process	154	0.05882
GO:0009894	regulation of catabolic process	biological_process	9	0.05883
GO:0044089	positive regulation of cellular component biogenesis	biological_process	3	0.05889
GO:0061408	positive regulation of transcription from RNA polymerase II promoter in response to heat stress	biological_process	1	0.05903
GO:0045039	protein import into mitochondrial inner membrane	biological_process	2	0.05917
GO:0006457	protein folding	biological_process	18	0.0592
GO:1901659	glycosyl compound biosynthetic process	biological_process	17	0.05941
GO:0043467	regulation of generation of precursor metabolites and energy	biological_process	4	0.05949
GO:0042548	regulation of photosynthesis, light reaction	biological_process	4	0.05949
GO:0006631	fatty acid metabolic process	biological_process	25	0.05981
GO:0042278	purine nucleoside metabolic process	biological_process	19	0.05981
GO:0009251	glucan catabolic process	biological_process	8	0.05989
GO:0032210	regulation of telomere maintenance via telomerase	biological_process	1	0.06
GO:0009888	tissue development	biological_process	21	0.06012
GO:0090069	regulation of ribosome biogenesis	biological_process	1	0.06031
GO:0071840	cellular component organization or biogenesis	biological_process	187	0.0605
GO:0006633	fatty acid biosynthetic process	biological_process	17	0.06072
GO:0006325	chromatin organization	biological_process	6	0.06106
GO:0006793	phosphorus metabolic process	biological_process	105	0.06189
GO:0022900	electron transport chain	biological_process	11	0.06217
GO:0010073	meristem maintenance	biological_process	3	0.06251
GO:1901137	carbohydrate derivative biosynthetic process	biological_process	40	0.06268
GO:0016071	mRNA metabolic process	biological_process	22	0.06272
GO:0006144	purine nucleobase metabolic process	biological_process	2	0.06278
GO:0071824	protein-DNA complex subunit organization	biological_process	2	0.063
GO:0044804	autophagy of nucleus	biological_process	5	0.06344
GO:0016122	xanthophyll metabolic process	biological_process	3	0.06473
GO:2000652	regulation of secondary cell wall biogenesis	biological_process	1	0.06476
GO:0009161	ribonucleoside monophosphate metabolic process	biological_process	13	0.06485
GO:0034220	ion transmembrane transport	biological_process	19	0.06516
GO:0002238	response to molecule of fungal origin	biological_process	1	0.06551
GO:0010628	positive regulation of gene expression	biological_process	28	0.0658
GO:0000491	small nucleolar ribonucleoprotein complex assembly	biological_process	1	0.0661
GO:0009605	response to external stimulus	biological_process	66	0.06695
GO:1903313	positive regulation of mRNA metabolic process	biological_process	1	0.06707
GO:0061014	positive regulation of mRNA catabolic process	biological_process	1	0.06707
GO:0009407	toxin catabolic process	biological_process	1	0.06719
GO:0090487	secondary metabolite catabolic process	biological_process	1	0.06719
GO:0009162	deoxyribonucleoside monophosphate metabolic process	biological_process	1	0.06752
GO:0009157	deoxyribonucleoside monophosphate biosynthetic process	biological_process	1	0.06752
GO:0010050	vegetative phase change	biological_process	1	0.0681
GO:0010158	abaxial cell fate specification	biological_process	1	0.0681
GO:0006220	pyrimidine nucleotide metabolic process	biological_process	8	0.06813
GO:1902348	cellular response to strigolactone	biological_process	1	0.06818
GO:0015936	coenzyme A metabolic process	biological_process	2	0.06822
GO:1900457	regulation of brassinosteroid mediated signaling pathway	biological_process	3	0.06825
GO:0043096	purine nucleobase salvage	biological_process	1	0.06897
GO:0046083	adenine metabolic process	biological_process	1	0.06897
GO:0046084	adenine biosynthetic process	biological_process	1	0.06897
GO:0006168	adenine salvage	biological_process	1	0.06897
GO:0010374	stomatal complex development	biological_process	2	0.06905
GO:0010218	response to far red light	biological_process	4	0.06959
GO:0072503	cellular divalent inorganic cation homeostasis	biological_process	2	0.06959
GO:0051785	positive regulation of nuclear division	biological_process	1	0.06964
GO:2000026	regulation of multicellular organismal development	biological_process	15	0.06978
GO:0006366	transcription from RNA polymerase II promoter	biological_process	16	0.06979
GO:0007010	cytoskeleton organization	biological_process	31	0.06991
GO:0048515	spermatid differentiation	biological_process	1	0.07002
GO:0007286	spermatid development	biological_process	1	0.07002
GO:0034394	protein localization to cell surface	biological_process	1	0.07002
GO:0046677	response to antibiotic	biological_process	7	0.07058
GO:0008033	tRNA processing	biological_process	10	0.07098
GO:0046065	dCTP metabolic process	biological_process	1	0.07116
GO:0006253	dCTP catabolic process	biological_process	1	0.07116
GO:0042262	DNA protection	biological_process	1	0.07116
GO:0032482	Rab protein signal transduction	biological_process	1	0.07138
GO:0006968	cellular defense response	biological_process	2	0.0714
GO:0071484	cellular response to light intensity	biological_process	3	0.07148
GO:0034293	sexual sporulation	biological_process	1	0.07195
GO:0046031	ADP metabolic process	biological_process	1	0.07315
GO:0006165	nucleoside diphosphate phosphorylation	biological_process	1	0.07315
GO:0006757	ATP generation from ADP	biological_process	1	0.07315
GO:0009179	purine ribonucleoside diphosphate metabolic process	biological_process	1	0.07315
GO:0009135	purine nucleoside diphosphate metabolic process	biological_process	1	0.07315
GO:0042866	pyruvate biosynthetic process	biological_process	1	0.07315
GO:0010039	response to iron ion	biological_process	1	0.0732
GO:0046040	IMP metabolic process	biological_process	5	0.07338
GO:0006188	IMP biosynthetic process	biological_process	5	0.07338
GO:0048236	plant-type sporogenesis	biological_process	1	0.07346
GO:0044255	cellular lipid metabolic process	biological_process	66	0.07348
GO:0006629	lipid metabolic process	biological_process	119	0.0736
GO:1901600	strigolactone metabolic process	biological_process	2	0.07416
GO:1901601	strigolactone biosynthetic process	biological_process	2	0.07416
GO:0010431	seed maturation	biological_process	3	0.07449
GO:0051302	regulation of cell division	biological_process	4	0.07466
GO:2000022	regulation of jasmonic acid mediated signaling pathway	biological_process	6	0.07479
GO:0042743	hydrogen peroxide metabolic process	biological_process	12	0.07502
GO:0044273	sulfur compound catabolic process	biological_process	2	0.07505
GO:0006720	isoprenoid metabolic process	biological_process	19	0.07517
GO:0010193	response to ozone	biological_process	4	0.07551
GO:0071248	cellular response to metal ion	biological_process	2	0.07557
GO:0071462	cellular response to water stimulus	biological_process	1	0.07562
GO:0042631	cellular response to water deprivation	biological_process	1	0.07562
GO:0042430	indole-containing compound metabolic process	biological_process	7	0.07563
GO:0006541	glutamine metabolic process	biological_process	9	0.07647
GO:0051493	regulation of cytoskeleton organization	biological_process	10	0.07654
GO:0031035	myosin filament disassembly	biological_process	2	0.07709
GO:0031037	myosin II filament disassembly	biological_process	2	0.07709
GO:0006612	protein targeting to membrane	biological_process	4	0.07731
GO:0019432	triglyceride biosynthetic process	biological_process	2	0.07736
GO:0006641	triglyceride metabolic process	biological_process	2	0.07736
GO:0006213	pyrimidine nucleoside metabolic process	biological_process	8	0.07773
GO:0006357	regulation of transcription from RNA polymerase II promoter	biological_process	16	0.078
GO:0042726	flavin-containing compound metabolic process	biological_process	2	0.07887
GO:0006465	signal peptide processing	biological_process	1	0.07891
GO:0071446	cellular response to salicylic acid stimulus	biological_process	2	0.07893
GO:0009863	salicylic acid mediated signaling pathway	biological_process	2	0.07893
GO:0009063	cellular amino acid catabolic process	biological_process	12	0.07897
GO:0008654	phospholipid biosynthetic process	biological_process	6	0.07898
GO:0019362	pyridine nucleotide metabolic process	biological_process	7	0.07925
GO:0046496	nicotinamide nucleotide metabolic process	biological_process	7	0.07925
GO:0045935	positive regulation of nucleobase-containing compound metabolic process	biological_process	28	0.07936
GO:0002184	cytoplasmic translational termination	biological_process	1	0.07939
GO:0006342	chromatin silencing	biological_process	3	0.07968
GO:0052386	cell wall thickening	biological_process	1	0.08029
GO:0052482	defense response by cell wall thickening	biological_process	1	0.08029
GO:0052543	callose deposition in cell wall	biological_process	1	0.08029
GO:0052544	defense response by callose deposition in cell wall	biological_process	1	0.08029
GO:0000278	mitotic cell cycle	biological_process	7	0.08038
GO:0016123	xanthophyll biosynthetic process	biological_process	2	0.08068
GO:0051560	mitochondrial calcium ion homeostasis	biological_process	2	0.08112
GO:0006857	oligopeptide transport	biological_process	8	0.08118
GO:0006754	ATP biosynthetic process	biological_process	6	0.08125
GO:0031425	chloroplast RNA processing	biological_process	5	0.08143
GO:0010030	positive regulation of seed germination	biological_process	3	0.08166
GO:0019219	regulation of nucleobase-containing compound metabolic process	biological_process	186	0.08194
GO:0045337	farnesyl diphosphate biosynthetic process	biological_process	1	0.08199
GO:0045338	farnesyl diphosphate metabolic process	biological_process	1	0.08199
GO:0007126	meiotic cell cycle	biological_process	7	0.08253
GO:0000280	nuclear division	biological_process	8	0.08336
GO:0090603	sieve element differentiation	biological_process	1	0.08341
GO:0015871	choline transport	biological_process	1	0.08341
GO:0006836	neurotransmitter transport	biological_process	1	0.08341
GO:0051254	positive regulation of RNA metabolic process	biological_process	26	0.08375
GO:0006733	oxidoreduction coenzyme metabolic process	biological_process	8	0.08416
GO:0006421	asparaginyl-tRNA aminoacylation	biological_process	1	0.08419
GO:0019441	tryptophan catabolic process to kynurenine	biological_process	3	0.08436
GO:0009310	amine catabolic process	biological_process	3	0.08436
GO:0046218	indolalkylamine catabolic process	biological_process	3	0.08436
GO:0042436	indole-containing compound catabolic process	biological_process	3	0.08436
GO:0042402	cellular biogenic amine catabolic process	biological_process	3	0.08436
GO:0006569	tryptophan catabolic process	biological_process	3	0.08436
GO:0070189	kynurenine metabolic process	biological_process	3	0.08436
GO:0044271	cellular nitrogen compound biosynthetic process	biological_process	263	0.0845
GO:0051649	establishment of localization in cell	biological_process	48	0.08489
GO:0044802	single-organism membrane organization	biological_process	14	0.08492
GO:0051239	regulation of multicellular organismal process	biological_process	20	0.08514
GO:0044264	cellular polysaccharide metabolic process	biological_process	42	0.08523
GO:0045893	positive regulation of transcription, DNA-templated	biological_process	25	0.08548
GO:0051261	protein depolymerization	biological_process	2	0.08558
GO:0044767	single-organism developmental process	biological_process	100	0.08559
GO:0052249	modulation of RNA levels in other organism involved in symbiotic interaction	biological_process	1	0.08563
GO:0009616	virus induced gene silencing	biological_process	1	0.08563
GO:0052018	modulation by symbiont of RNA levels in host	biological_process	1	0.08563
GO:0006537	glutamate biosynthetic process	biological_process	2	0.08622
GO:0009226	nucleotide-sugar biosynthetic process	biological_process	1	0.08742
GO:0006865	amino acid transport	biological_process	5	0.08758
GO:0009893	positive regulation of metabolic process	biological_process	38	0.08769
GO:1902680	positive regulation of RNA biosynthetic process	biological_process	25	0.08793
GO:0019751	polyol metabolic process	biological_process	5	0.08812
GO:0045727	positive regulation of translation	biological_process	2	0.08895
GO:0006007	glucose catabolic process	biological_process	4	0.089
GO:0030163	protein catabolic process	biological_process	22	0.08943
GO:2000377	regulation of reactive oxygen species metabolic process	biological_process	1	0.0897
GO:0033554	cellular response to stress	biological_process	50	0.09008
GO:0009832	plant-type cell wall biogenesis	biological_process	5	0.09009
GO:0030150	protein import into mitochondrial matrix	biological_process	1	0.09061
GO:0016050	vesicle organization	biological_process	3	0.09089
GO:0048255	mRNA stabilization	biological_process	2	0.09106
GO:1902373	negative regulation of mRNA catabolic process	biological_process	2	0.09106
GO:0023052	signaling	biological_process	101	0.09132
GO:0044700	single organism signaling	biological_process	101	0.09132
GO:0050789	regulation of biological process	biological_process	335	0.09141
GO:0006003	fructose 2,6-bisphosphate metabolic process	biological_process	2	0.09142
GO:0051240	positive regulation of multicellular organismal process	biological_process	8	0.09175
GO:0010604	positive regulation of macromolecule metabolic process	biological_process	36	0.0921
GO:0010150	leaf senescence	biological_process	6	0.09213
GO:0010260	animal organ senescence	biological_process	6	0.09213
GO:0035821	modification of morphology or physiology of other organism	biological_process	1	0.09221
GO:0000375	RNA splicing, via transesterification reactions	biological_process	10	0.09241
GO:0000377	RNA splicing, via transesterification reactions with bulged adenosine as nucleophile	biological_process	10	0.09241
GO:0071310	cellular response to organic substance	biological_process	67	0.09254
GO:0031325	positive regulation of cellular metabolic process	biological_process	37	0.09359
GO:0051707	response to other organism	biological_process	45	0.09374
GO:0042398	cellular modified amino acid biosynthetic process	biological_process	1	0.09382
GO:0006448	regulation of translational elongation	biological_process	2	0.09384
GO:0006401	RNA catabolic process	biological_process	6	0.09395
GO:0051641	cellular localization	biological_process	56	0.09429
GO:0032259	methylation	biological_process	26	0.09482
GO:0000281	mitotic cytokinesis	biological_process	2	0.09526
GO:0048609	multicellular organismal reproductive process	biological_process	5	0.09541
GO:0022411	cellular component disassembly	biological_process	8	0.09591
GO:0009933	meristem structural organization	biological_process	1	0.09626
GO:0048580	regulation of post-embryonic development	biological_process	12	0.0963
GO:0009834	plant-type secondary cell wall biogenesis	biological_process	3	0.09702
GO:0010629	negative regulation of gene expression	biological_process	18	0.09715
GO:0042537	benzene-containing compound metabolic process	biological_process	12	0.09717
GO:0048864	stem cell development	biological_process	2	0.0973
GO:0019827	stem cell population maintenance	biological_process	2	0.0973
GO:0016117	carotenoid biosynthetic process	biological_process	3	0.09816
GO:0016109	tetraterpenoid biosynthetic process	biological_process	3	0.09816
GO:0015672	monovalent inorganic cation transport	biological_process	10	0.09824
GO:0044106	cellular amine metabolic process	biological_process	16	0.09851
GO:0016116	carotenoid metabolic process	biological_process	4	0.09896
GO:0016108	tetraterpenoid metabolic process	biological_process	4	0.09896
GO:0044210	'de novo' CTP biosynthetic process	biological_process	3	0.09896
GO:0006302	double-strand break repair	biological_process	1	0.09909
GO:0051781	positive regulation of cell division	biological_process	1	0.09958
GO:0030030	cell projection organization	biological_process	2	0.0996
GO:0000154	rRNA modification	biological_process	3	0.09975
GO:0006869	lipid transport	biological_process	16	0.09991
GO:0019478	D-amino acid catabolic process	biological_process	1	0.10068
GO:0032544	plastid translation	biological_process	1	0.1011
GO:0048285	organelle fission	biological_process	14	0.10157
GO:1901564	organonitrogen compound metabolic process	biological_process	212	0.10246
GO:0033540	fatty acid beta-oxidation using acyl-CoA oxidase	biological_process	1	0.10251
GO:0010594	regulation of endothelial cell migration	biological_process	2	0.10268
GO:0001667	ameboidal-type cell migration	biological_process	2	0.10268
GO:0010631	epithelial cell migration	biological_process	2	0.10268
GO:0010632	regulation of epithelial cell migration	biological_process	2	0.10268
GO:0034332	adherens junction organization	biological_process	2	0.10268
GO:0034333	adherens junction assembly	biological_process	2	0.10268
GO:0043542	endothelial cell migration	biological_process	2	0.10268
GO:0043627	response to estrogen	biological_process	2	0.10268
GO:0030335	positive regulation of cell migration	biological_process	2	0.10268
GO:0090130	tissue migration	biological_process	2	0.10268
GO:0090132	epithelium migration	biological_process	2	0.10268
GO:0045786	negative regulation of cell cycle	biological_process	1	0.10277
GO:0019320	hexose catabolic process	biological_process	5	0.10283
GO:0046365	monosaccharide catabolic process	biological_process	5	0.10283
GO:0019363	pyridine nucleotide biosynthetic process	biological_process	3	0.10301
GO:0019359	nicotinamide nucleotide biosynthetic process	biological_process	3	0.10301
GO:0009891	positive regulation of biosynthetic process	biological_process	29	0.10316
GO:0006012	galactose metabolic process	biological_process	6	0.10322
GO:0070647	protein modification by small protein conjugation or removal	biological_process	20	0.10347
GO:0031109	microtubule polymerization or depolymerization	biological_process	1	0.10357
GO:0032958	inositol phosphate biosynthetic process	biological_process	2	0.10365
GO:0007018	microtubule-based movement	biological_process	9	0.10404
GO:0046488	phosphatidylinositol metabolic process	biological_process	8	0.10422
GO:0010586	miRNA metabolic process	biological_process	1	0.10477
GO:0010587	miRNA catabolic process	biological_process	1	0.10477
GO:1990074	polyuridylation-dependent mRNA catabolic process	biological_process	1	0.10477
GO:0010027	thylakoid membrane organization	biological_process	2	0.10486
GO:0009668	plastid membrane organization	biological_process	2	0.10486
GO:0006109	regulation of carbohydrate metabolic process	biological_process	3	0.10497
GO:0043207	response to external biotic stimulus	biological_process	45	0.1051
GO:0043620	regulation of DNA-templated transcription in response to stress	biological_process	1	0.10554
GO:0046364	monosaccharide biosynthetic process	biological_process	3	0.10554
GO:0006073	cellular glucan metabolic process	biological_process	40	0.1059
GO:0061635	regulation of protein complex stability	biological_process	2	0.10601
GO:0009737	response to abscisic acid	biological_process	26	0.10652
GO:0010162	seed dormancy process	biological_process	2	0.1068
GO:0022611	dormancy process	biological_process	2	0.1068
GO:0006656	phosphatidylcholine biosynthetic process	biological_process	2	0.10696
GO:0034728	nucleosome organization	biological_process	2	0.10763
GO:0006281	DNA repair	biological_process	12	0.10766
GO:0009414	response to water deprivation	biological_process	14	0.10771
GO:0044030	regulation of DNA methylation	biological_process	1	0.10771
GO:0051644	plastid localization	biological_process	7	0.10804
GO:0009072	aromatic amino acid family metabolic process	biological_process	11	0.10817
GO:0033993	response to lipid	biological_process	37	0.10859
GO:0010380	regulation of chlorophyll biosynthetic process	biological_process	4	0.10925
GO:0051817	modification of morphology or physiology of other organism involved in symbiotic interaction	biological_process	1	0.10934
GO:0009798	axis specification	biological_process	1	0.10935
GO:0072593	reactive oxygen species metabolic process	biological_process	13	0.10997
GO:1901068	guanosine-containing compound metabolic process	biological_process	7	0.11016
GO:0010720	positive regulation of cell development	biological_process	1	0.11031
GO:0031344	regulation of cell projection organization	biological_process	2	0.11031
GO:0031346	positive regulation of cell projection organization	biological_process	2	0.11031
GO:0015980	energy derivation by oxidation of organic compounds	biological_process	14	0.11041
GO:0090316	positive regulation of intracellular protein transport	biological_process	2	0.11069
GO:0006766	vitamin metabolic process	biological_process	10	0.11071
GO:0000902	cell morphogenesis	biological_process	14	0.11105
GO:0031120	snRNA pseudouridine synthesis	biological_process	1	0.11174
GO:0051701	interaction with host	biological_process	1	0.11219
GO:2000031	regulation of salicylic acid mediated signaling pathway	biological_process	2	0.11219
GO:0035690	cellular response to drug	biological_process	2	0.11253
GO:0044247	cellular polysaccharide catabolic process	biological_process	8	0.11337
GO:0043414	macromolecule methylation	biological_process	7	0.11356
GO:0016553	base conversion or substitution editing	biological_process	4	0.11389
GO:0016554	cytidine to uridine editing	biological_process	4	0.11389
GO:0045787	positive regulation of cell cycle	biological_process	1	0.11558
GO:0010638	positive regulation of organelle organization	biological_process	7	0.11603
GO:0009644	response to high light intensity	biological_process	4	0.11658
GO:0032446	protein modification by small protein conjugation	biological_process	16	0.11685
GO:0048878	chemical homeostasis	biological_process	21	0.11707
GO:0055062	phosphate ion homeostasis	biological_process	1	0.11713
GO:0055083	monovalent inorganic anion homeostasis	biological_process	1	0.11713
GO:0072505	divalent inorganic anion homeostasis	biological_process	1	0.11713
GO:0072506	trivalent inorganic anion homeostasis	biological_process	1	0.11713
GO:1901419	regulation of response to alcohol	biological_process	8	0.11725
GO:0006739	NADP metabolic process	biological_process	5	0.11732
GO:1902275	regulation of chromatin organization	biological_process	1	0.11752
GO:0050793	regulation of developmental process	biological_process	21	0.11765
GO:0006662	glycerol ether metabolic process	biological_process	1	0.11769
GO:1901699	cellular response to nitrogen compound	biological_process	5	0.11799
GO:0006928	movement of cell or subcellular component	biological_process	12	0.11799
GO:0055074	calcium ion homeostasis	biological_process	2	0.11842
GO:0006874	cellular calcium ion homeostasis	biological_process	2	0.11842
GO:0005982	starch metabolic process	biological_process	15	0.11908
GO:0043255	regulation of carbohydrate biosynthetic process	biological_process	3	0.11924
GO:0006323	DNA packaging	biological_process	1	0.11927
GO:0009642	response to light intensity	biological_process	7	0.1193
GO:0044275	cellular carbohydrate catabolic process	biological_process	12	0.11932
GO:0010087	phloem or xylem histogenesis	biological_process	3	0.11949
GO:0010876	lipid localization	biological_process	17	0.11955
GO:0043687	post-translational protein modification	biological_process	1	0.1199
GO:0008356	asymmetric cell division	biological_process	3	0.12005
GO:0006782	protoporphyrinogen IX biosynthetic process	biological_process	1	0.12032
GO:0046501	protoporphyrinogen IX metabolic process	biological_process	1	0.12032
GO:0022406	membrane docking	biological_process	2	0.12094
GO:0007165	signal transduction	biological_process	101	0.12117
GO:0032511	late endosome to vacuole transport via multivesicular body sorting pathway	biological_process	2	0.12164
GO:0048583	regulation of response to stimulus	biological_process	27	0.12175
GO:0010091	trichome branching	biological_process	2	0.12202
GO:0006997	nucleus organization	biological_process	4	0.12236
GO:0006096	glycolytic process	biological_process	11	0.12246
GO:0019538	protein metabolic process	biological_process	217	0.12261
GO:0006221	pyrimidine nucleotide biosynthetic process	biological_process	6	0.12301
GO:0051252	regulation of RNA metabolic process	biological_process	185	0.12331
GO:0009956	radial pattern formation	biological_process	2	0.1243
GO:0016237	lysosomal microautophagy	biological_process	2	0.12483
GO:1902534	single-organism membrane invagination	biological_process	2	0.12483
GO:0034727	piecemeal microautophagy of nucleus	biological_process	2	0.12483
GO:0009299	mRNA transcription	biological_process	3	0.12565
GO:0030243	cellulose metabolic process	biological_process	14	0.12588
GO:0042737	drug catabolic process	biological_process	2	0.12597
GO:0010239	chloroplast mRNA processing	biological_process	3	0.12732
GO:0043903	regulation of symbiosis, encompassing mutualism through parasitism	biological_process	1	0.12776
GO:0006771	riboflavin metabolic process	biological_process	2	0.12778
GO:0009231	riboflavin biosynthetic process	biological_process	2	0.12778
GO:0042727	flavin-containing compound biosynthetic process	biological_process	2	0.12778
GO:1900458	negative regulation of brassinosteroid mediated signaling pathway	biological_process	2	0.12852
GO:0018904	ether metabolic process	biological_process	1	0.1292
GO:0008154	actin polymerization or depolymerization	biological_process	4	0.13016
GO:0009787	regulation of abscisic acid-activated signaling pathway	biological_process	5	0.13067
GO:0034614	cellular response to reactive oxygen species	biological_process	11	0.13085
GO:0009698	phenylpropanoid metabolic process	biological_process	12	0.13086
GO:0010089	xylem development	biological_process	1	0.13156
GO:0060627	regulation of vesicle-mediated transport	biological_process	3	0.13174
GO:0009145	purine nucleoside triphosphate biosynthetic process	biological_process	8	0.13185
GO:0009206	purine ribonucleoside triphosphate biosynthetic process	biological_process	8	0.13185
GO:0009741	response to brassinosteroid	biological_process	7	0.13247
GO:0051495	positive regulation of cytoskeleton organization	biological_process	5	0.13257
GO:0010675	regulation of cellular carbohydrate metabolic process	biological_process	3	0.1328
GO:0031054	pre-miRNA processing	biological_process	2	0.13295
GO:1901259	chloroplast rRNA processing	biological_process	2	0.13327
GO:0015914	phospholipid transport	biological_process	5	0.13362
GO:0009165	nucleotide biosynthetic process	biological_process	25	0.13397
GO:0009967	positive regulation of signal transduction	biological_process	4	0.13464
GO:0023056	positive regulation of signaling	biological_process	4	0.13464
GO:0044003	modification by symbiont of host morphology or physiology	biological_process	1	0.13464
GO:0090502	RNA phosphodiester bond hydrolysis, endonucleolytic	biological_process	2	0.13486
GO:0007030	Golgi organization	biological_process	2	0.13498
GO:0006914	autophagy	biological_process	14	0.13526
GO:0046386	deoxyribose phosphate catabolic process	biological_process	1	0.13553
GO:0006244	pyrimidine nucleotide catabolic process	biological_process	1	0.13553
GO:0009223	pyrimidine deoxyribonucleotide catabolic process	biological_process	1	0.13553
GO:0051445	regulation of meiotic cell cycle	biological_process	1	0.13566
GO:0051446	positive regulation of meiotic cell cycle	biological_process	1	0.13566
GO:0052837	thiazole biosynthetic process	biological_process	1	0.1357
GO:0052838	thiazole metabolic process	biological_process	1	0.1357
GO:0046484	oxazole or thiazole metabolic process	biological_process	1	0.1357
GO:0018131	oxazole or thiazole biosynthetic process	biological_process	1	0.1357
GO:0030258	lipid modification	biological_process	11	0.13637
GO:0010275	NAD(P)H dehydrogenase complex assembly	biological_process	1	0.13642
GO:0030705	cytoskeleton-dependent intracellular transport	biological_process	1	0.13648
GO:0031022	nuclear migration along microfilament	biological_process	1	0.13648
GO:1902265	abscisic acid homeostasis	biological_process	1	0.13648
GO:0006849	plasma membrane pyruvate transport	biological_process	1	0.13662
GO:1901475	pyruvate transmembrane transport	biological_process	1	0.13662
GO:0070646	protein modification by small protein removal	biological_process	4	0.13683
GO:0000098	sulfur amino acid catabolic process	biological_process	1	0.13685
GO:0040020	regulation of meiotic nuclear division	biological_process	1	0.13789
GO:0045836	positive regulation of meiotic nuclear division	biological_process	1	0.13789
GO:0007276	gamete generation	biological_process	2	0.1384
GO:0046785	microtubule polymerization	biological_process	1	0.13845
GO:0010206	photosystem II repair	biological_process	3	0.13852
GO:0032844	regulation of homeostatic process	biological_process	1	0.13895
GO:0010564	regulation of cell cycle process	biological_process	4	0.13897
GO:0046173	polyol biosynthetic process	biological_process	2	0.13919
GO:0046939	nucleotide phosphorylation	biological_process	1	0.13926
GO:0006900	vesicle budding from membrane	biological_process	2	0.13959
GO:0009695	jasmonic acid biosynthetic process	biological_process	3	0.13978
GO:0010019	chloroplast-nucleus signaling pathway	biological_process	2	0.14001
GO:0001711	endodermal cell fate commitment	biological_process	1	0.1401
GO:0001714	endodermal cell fate specification	biological_process	1	0.1401
GO:0060795	cell fate commitment involved in formation of primary germ layer	biological_process	1	0.1401
GO:1901863	positive regulation of muscle tissue development	biological_process	1	0.14032
GO:0055001	muscle cell development	biological_process	1	0.14032
GO:0055002	striated muscle cell development	biological_process	1	0.14032
GO:0045661	regulation of myoblast differentiation	biological_process	1	0.14032
GO:0045663	positive regulation of myoblast differentiation	biological_process	1	0.14032
GO:0010831	positive regulation of myotube differentiation	biological_process	1	0.14032
GO:2001016	positive regulation of skeletal muscle cell differentiation	biological_process	1	0.14032
GO:0001501	skeletal system development	biological_process	1	0.14032
GO:0014904	myotube cell development	biological_process	1	0.14032
GO:0031032	actomyosin structure organization	biological_process	1	0.14032
GO:0048741	skeletal muscle fiber development	biological_process	1	0.14032
GO:0048742	regulation of skeletal muscle fiber development	biological_process	1	0.14032
GO:0048747	muscle fiber development	biological_process	1	0.14032
GO:0048738	cardiac muscle tissue development	biological_process	1	0.14032
GO:0048701	embryonic cranial skeleton morphogenesis	biological_process	1	0.14032
GO:0048702	embryonic neurocranium morphogenesis	biological_process	1	0.14032
GO:0048704	embryonic skeletal system morphogenesis	biological_process	1	0.14032
GO:0048705	skeletal system morphogenesis	biological_process	1	0.14032
GO:0048706	embryonic skeletal system development	biological_process	1	0.14032
GO:0060297	regulation of sarcomere organization	biological_process	1	0.14032
GO:0060298	positive regulation of sarcomere organization	biological_process	1	0.14032
GO:0051155	positive regulation of striated muscle cell differentiation	biological_process	1	0.14032
GO:0051149	positive regulation of muscle cell differentiation	biological_process	1	0.14032
GO:0048643	positive regulation of skeletal muscle tissue development	biological_process	1	0.14032
GO:0048636	positive regulation of muscle organ development	biological_process	1	0.14032
GO:0003228	atrial cardiac muscle tissue development	biological_process	1	0.14032
GO:0061053	somite development	biological_process	1	0.14032
GO:0045445	myoblast differentiation	biological_process	1	0.14032
GO:1902811	positive regulation of skeletal muscle fiber differentiation	biological_process	1	0.14032
GO:0045214	sarcomere organization	biological_process	1	0.14032
GO:0061157	mRNA destabilization	biological_process	1	0.14032
GO:0061158	3'-UTR-mediated mRNA destabilization	biological_process	1	0.14032
GO:2000766	negative regulation of cytoplasmic translation	biological_process	1	0.14032
GO:0050779	RNA destabilization	biological_process	1	0.14032
GO:0045844	positive regulation of striated muscle tissue development	biological_process	1	0.14032
GO:0030239	myofibril assembly	biological_process	1	0.14032
GO:0001756	somitogenesis	biological_process	1	0.14032
GO:0000373	Group II intron splicing	biological_process	3	0.14038
GO:0016998	cell wall macromolecule catabolic process	biological_process	4	0.14059
GO:0006810	transport	biological_process	187	0.14111
GO:0009772	photosynthetic electron transport in photosystem II	biological_process	1	0.14253
GO:0090071	negative regulation of ribosome biogenesis	biological_process	1	0.14275
GO:0046621	negative regulation of organ growth	biological_process	3	0.1432
GO:0033043	regulation of organelle organization	biological_process	14	0.14356
GO:0033044	regulation of chromosome organization	biological_process	2	0.14366
GO:0043090	amino acid import	biological_process	1	0.14423
GO:0034404	nucleobase-containing small molecule biosynthetic process	biological_process	2	0.14436
GO:0009110	vitamin biosynthetic process	biological_process	8	0.14449
GO:0009117	nucleotide metabolic process	biological_process	36	0.14467
GO:0080021	response to benzoic acid	biological_process	1	0.14487
GO:0045927	positive regulation of growth	biological_process	5	0.14533
GO:0042254	ribosome biogenesis	biological_process	17	0.1454
GO:0006414	translational elongation	biological_process	2	0.14555
GO:0042446	hormone biosynthetic process	biological_process	10	0.14565
GO:0048532	anatomical structure arrangement	biological_process	1	0.14622
GO:0048863	stem cell differentiation	biological_process	3	0.14638
GO:1901334	lactone metabolic process	biological_process	2	0.14656
GO:1901336	lactone biosynthetic process	biological_process	2	0.14656
GO:0080050	regulation of seed development	biological_process	2	0.14658
GO:0043173	nucleotide salvage	biological_process	2	0.14678
GO:0048268	clathrin coat assembly	biological_process	2	0.14685
GO:1902290	positive regulation of defense response to oomycetes	biological_process	1	0.14702
GO:1902288	regulation of defense response to oomycetes	biological_process	1	0.14702
GO:0009617	response to bacterium	biological_process	16	0.14717
GO:0032984	macromolecular complex disassembly	biological_process	6	0.14733
GO:0090503	RNA phosphodiester bond hydrolysis, exonucleolytic	biological_process	1	0.14804
GO:2000112	regulation of cellular macromolecule biosynthetic process	biological_process	184	0.14807
GO:0043562	cellular response to nitrogen levels	biological_process	3	0.14872
GO:0016226	iron-sulfur cluster assembly	biological_process	3	0.14888
GO:0031163	metallo-sulfur cluster assembly	biological_process	3	0.14888
GO:0006040	amino sugar metabolic process	biological_process	5	0.14903
GO:2001020	regulation of response to DNA damage stimulus	biological_process	2	0.14911
GO:0009637	response to blue light	biological_process	9	0.14912
GO:0044042	glucan metabolic process	biological_process	40	0.14934
GO:0007008	outer mitochondrial membrane organization	biological_process	1	0.14954
GO:0045040	protein import into mitochondrial outer membrane	biological_process	1	0.14954
GO:0007059	chromosome segregation	biological_process	2	0.14961
GO:0016114	terpenoid biosynthetic process	biological_process	10	0.14966
GO:0006749	glutathione metabolic process	biological_process	6	0.14978
GO:0043446	cellular alkane metabolic process	biological_process	1	0.14989
GO:0043447	alkane biosynthetic process	biological_process	1	0.14989
GO:0045038	protein import into chloroplast thylakoid membrane	biological_process	1	0.14994
GO:0090567	reproductive shoot system development	biological_process	14	0.15007
GO:0031038	myosin II filament organization	biological_process	2	0.15011
GO:0000305	response to oxygen radical	biological_process	1	0.15044
GO:0006801	superoxide metabolic process	biological_process	1	0.15044
GO:0052646	alditol phosphate metabolic process	biological_process	2	0.15054
GO:0044805	late nucleophagy	biological_process	1	0.15054
GO:0033354	chlorophyll cycle	biological_process	1	0.15073
GO:0043618	regulation of transcription from RNA polymerase II promoter in response to stress	biological_process	1	0.15081
GO:0008283	cell proliferation	biological_process	4	0.15108
GO:0042147	retrograde transport, endosome to Golgi	biological_process	1	0.15132
GO:1902679	negative regulation of RNA biosynthetic process	biological_process	14	0.15148
GO:0000226	microtubule cytoskeleton organization	biological_process	13	0.15174
GO:0009306	protein secretion	biological_process	1	0.15211
GO:0030186	melatonin metabolic process	biological_process	1	0.15225
GO:0030187	melatonin biosynthetic process	biological_process	1	0.15225
GO:0015807	L-amino acid transport	biological_process	1	0.15245
GO:1902475	L-alpha-amino acid transmembrane transport	biological_process	1	0.15245
GO:0031099	regeneration	biological_process	1	0.1526
GO:0042246	tissue regeneration	biological_process	1	0.1526
GO:0051172	negative regulation of nitrogen compound metabolic process	biological_process	24	0.15279
GO:0098655	cation transmembrane transport	biological_process	12	0.1529
GO:0007275	multicellular organism development	biological_process	86	0.15299
GO:0072329	monocarboxylic acid catabolic process	biological_process	6	0.15323
GO:0009968	negative regulation of signal transduction	biological_process	5	0.15349
GO:1901463	regulation of tetrapyrrole biosynthetic process	biological_process	4	0.15367
GO:0006308	DNA catabolic process	biological_process	2	0.1545
GO:0010492	maintenance of shoot apical meristem identity	biological_process	1	0.15463
GO:0009934	regulation of meristem structural organization	biological_process	1	0.15492
GO:0042435	indole-containing compound biosynthetic process	biological_process	2	0.1558
GO:0006298	mismatch repair	biological_process	1	0.15597
GO:0009800	cinnamic acid biosynthetic process	biological_process	4	0.15622
GO:0009803	cinnamic acid metabolic process	biological_process	4	0.15622
GO:0072529	pyrimidine-containing compound catabolic process	biological_process	2	0.15645
GO:0007265	Ras protein signal transduction	biological_process	1	0.15663
GO:0010028	xanthophyll cycle	biological_process	1	0.15665
GO:0034470	ncRNA processing	biological_process	22	0.15667
GO:1901605	alpha-amino acid metabolic process	biological_process	41	0.15673
GO:0046490	isopentenyl diphosphate metabolic process	biological_process	1	0.15674
GO:0009240	isopentenyl diphosphate biosynthetic process	biological_process	1	0.15674
GO:0032501	multicellular organismal process	biological_process	103	0.15681
GO:0080187	floral organ senescence	biological_process	1	0.15704
GO:0009440	cyanate catabolic process	biological_process	1	0.1572
GO:0031668	cellular response to extracellular stimulus	biological_process	18	0.15732
GO:0006741	NADP biosynthetic process	biological_process	1	0.15743
GO:0051259	protein oligomerization	biological_process	3	0.15749
GO:0005996	monosaccharide metabolic process	biological_process	45	0.15754
GO:0034605	cellular response to heat	biological_process	4	0.15807
GO:0007142	male meiosis II	biological_process	1	0.15827
GO:0051606	detection of stimulus	biological_process	2	0.15889
GO:0098727	maintenance of cell number	biological_process	2	0.15916
GO:0072527	pyrimidine-containing compound metabolic process	biological_process	12	0.16009
GO:0010109	regulation of photosynthesis	biological_process	5	0.16071
GO:0019674	NAD metabolic process	biological_process	2	0.16075
GO:0007155	cell adhesion	biological_process	2	0.16081
GO:0022610	biological adhesion	biological_process	2	0.16081
GO:0006402	mRNA catabolic process	biological_process	5	0.16114
GO:0046130	purine ribonucleoside catabolic process	biological_process	3	0.16154
GO:2001023	regulation of response to drug	biological_process	2	0.16158
GO:2001038	regulation of cellular response to drug	biological_process	2	0.16158
GO:0010927	cellular component assembly involved in morphogenesis	biological_process	2	0.16186
GO:0009595	detection of biotic stimulus	biological_process	1	0.16211
GO:0080148	negative regulation of response to water deprivation	biological_process	1	0.16234
GO:0002376	immune system process	biological_process	15	0.16245
GO:1902903	regulation of supramolecular fiber organization	biological_process	1	0.16254
GO:0046292	formaldehyde metabolic process	biological_process	2	0.16256
GO:0010561	negative regulation of glycoprotein biosynthetic process	biological_process	1	0.16322
GO:0010559	regulation of glycoprotein biosynthetic process	biological_process	1	0.16322
GO:1903018	regulation of glycoprotein metabolic process	biological_process	1	0.16322
GO:1903019	negative regulation of glycoprotein metabolic process	biological_process	1	0.16322
GO:0045222	CD4 biosynthetic process	biological_process	1	0.16322
GO:0045223	regulation of CD4 biosynthetic process	biological_process	1	0.16322
GO:0045225	negative regulation of CD4 biosynthetic process	biological_process	1	0.16322
GO:0009101	glycoprotein biosynthetic process	biological_process	11	0.16324
GO:0000493	box H/ACA snoRNP assembly	biological_process	1	0.1635
GO:0009908	flower development	biological_process	14	0.16357
GO:0042550	photosystem I stabilization	biological_process	2	0.16377
GO:0000023	maltose metabolic process	biological_process	1	0.16397
GO:0071277	cellular response to calcium ion	biological_process	1	0.16423
GO:0007638	mechanosensory behavior	biological_process	1	0.16427
GO:0033517	myo-inositol hexakisphosphate metabolic process	biological_process	2	0.16443
GO:0010264	myo-inositol hexakisphosphate biosynthetic process	biological_process	2	0.16443
GO:0051300	spindle pole body organization	biological_process	1	0.16517
GO:0031321	ascospore-type prospore assembly	biological_process	1	0.16517
GO:0031322	ascospore-type prospore-specific spindle pole body remodeling	biological_process	1	0.16517
GO:0032505	reproduction of a single-celled organism	biological_process	1	0.16517
GO:0022413	reproductive process in single-celled organism	biological_process	1	0.16517
GO:1990395	meiotic spindle pole body organization	biological_process	1	0.16517
GO:0030437	ascospore formation	biological_process	1	0.16517
GO:0043935	sexual sporulation resulting in formation of a cellular spore	biological_process	1	0.16517
GO:0000455	enzyme-directed rRNA pseudouridine synthesis	biological_process	1	0.16565
GO:0015985	energy coupled proton transport, down electrochemical gradient	biological_process	5	0.1658
GO:0015986	ATP synthesis coupled proton transport	biological_process	5	0.1658
GO:0007264	small GTPase mediated signal transduction	biological_process	6	0.16614
GO:0036065	fucosylation	biological_process	1	0.16614
GO:0035265	organ growth	biological_process	5	0.16661
GO:0032212	positive regulation of telomere maintenance via telomerase	biological_process	1	0.16662
GO:0000454	snoRNA guided rRNA pseudouridine synthesis	biological_process	1	0.16662
GO:0045740	positive regulation of DNA replication	biological_process	1	0.16662
GO:0051258	protein polymerization	biological_process	3	0.16665
GO:0071322	cellular response to carbohydrate stimulus	biological_process	3	0.16746
GO:1902932	positive regulation of alcohol biosynthetic process	biological_process	1	0.16761
GO:0030656	regulation of vitamin metabolic process	biological_process	1	0.16761
GO:0046136	positive regulation of vitamin metabolic process	biological_process	1	0.16761
GO:0046131	pyrimidine ribonucleoside metabolic process	biological_process	7	0.1679
GO:0006468	protein phosphorylation	biological_process	25	0.16805
GO:0006995	cellular response to nitrogen starvation	biological_process	3	0.16809
GO:0051187	cofactor catabolic process	biological_process	5	0.16849
GO:0006090	pyruvate metabolic process	biological_process	13	0.16862
GO:2000009	negative regulation of protein localization to cell surface	biological_process	1	0.16921
GO:0046036	CTP metabolic process	biological_process	5	0.1695
GO:0006241	CTP biosynthetic process	biological_process	5	0.1695
GO:0009148	pyrimidine nucleoside triphosphate biosynthetic process	biological_process	5	0.1695
GO:0009208	pyrimidine ribonucleoside triphosphate metabolic process	biological_process	5	0.1695
GO:0009209	pyrimidine ribonucleoside triphosphate biosynthetic process	biological_process	5	0.1695
GO:0019447	D-cysteine catabolic process	biological_process	1	0.1697
GO:0046438	D-cysteine metabolic process	biological_process	1	0.1697
GO:0002252	immune effector process	biological_process	3	0.16991
GO:0009451	RNA modification	biological_process	37	0.17027
GO:0001708	cell fate specification	biological_process	3	0.17081
GO:0006613	cotranslational protein targeting to membrane	biological_process	2	0.17088
GO:0001676	long-chain fatty acid metabolic process	biological_process	1	0.17123
GO:0071668	plant-type cell wall assembly	biological_process	1	0.17124
GO:0070726	cell wall assembly	biological_process	1	0.17124
GO:0010215	cellulose microfibril organization	biological_process	1	0.17124
GO:0005976	polysaccharide metabolic process	biological_process	51	0.17208
GO:2000012	regulation of auxin polar transport	biological_process	1	0.17248
GO:1901657	glycosyl compound metabolic process	biological_process	33	0.17248
GO:0019222	regulation of metabolic process	biological_process	235	0.17378
GO:0003333	amino acid transmembrane transport	biological_process	2	0.17391
GO:0032386	regulation of intracellular transport	biological_process	2	0.17405
GO:0031407	oxylipin metabolic process	biological_process	8	0.17427
GO:0055071	manganese ion homeostasis	biological_process	1	0.17436
GO:0008618	7-methylguanosine metabolic process	biological_process	1	0.17446
GO:0046907	intracellular transport	biological_process	39	0.17447
GO:0071577	zinc II ion transmembrane transport	biological_process	1	0.17454
GO:0006829	zinc II ion transport	biological_process	1	0.17454
GO:0015695	organic cation transport	biological_process	1	0.17518
GO:0010647	positive regulation of cell communication	biological_process	4	0.17556
GO:0032504	multicellular organism reproduction	biological_process	6	0.17561
GO:0006269	DNA replication, synthesis of RNA primer	biological_process	1	0.17573
GO:0032510	endosome to lysosome transport via multivesicular body sorting pathway	biological_process	1	0.17611
GO:0007349	cellularization	biological_process	1	0.17641
GO:0000740	nuclear membrane fusion	biological_process	1	0.17641
GO:0009558	embryo sac cellularization	biological_process	1	0.17641
GO:0010198	synergid death	biological_process	1	0.17641
GO:0006000	fructose metabolic process	biological_process	2	0.17763
GO:0071241	cellular response to inorganic substance	biological_process	2	0.17781
GO:0015992	proton transport	biological_process	7	0.17855
GO:0006818	hydrogen transport	biological_process	7	0.17855
GO:0000303	response to superoxide	biological_process	1	0.17873
GO:0065008	regulation of biological quality	biological_process	63	0.1793
GO:0065007	biological regulation	biological_process	369	0.17969
GO:0017001	antibiotic catabolic process	biological_process	1	0.18017
GO:0033355	ascorbate glutathione cycle	biological_process	1	0.18017
GO:0044085	cellular component biogenesis	biological_process	74	0.18033
GO:0009606	tropism	biological_process	4	0.18035
GO:0019419	sulfate reduction	biological_process	1	0.1812
GO:0006423	cysteinyl-tRNA aminoacylation	biological_process	1	0.18135
GO:0048729	tissue morphogenesis	biological_process	2	0.18136
GO:0002009	morphogenesis of an epithelium	biological_process	2	0.18136
GO:0045903	positive regulation of translational fidelity	biological_process	1	0.18151
GO:0007281	germ cell development	biological_process	1	0.18159
GO:0019336	phenol-containing compound catabolic process	biological_process	1	0.18164
GO:1901999	homogentisate metabolic process	biological_process	1	0.18164
GO:1902000	homogentisate catabolic process	biological_process	1	0.18164
GO:0006817	phosphate ion transport	biological_process	4	0.18188
GO:0009060	aerobic respiration	biological_process	5	0.18204
GO:0006152	purine nucleoside catabolic process	biological_process	4	0.1823
GO:0009164	nucleoside catabolic process	biological_process	4	0.1823
GO:0042454	ribonucleoside catabolic process	biological_process	4	0.1823
GO:0017144	drug metabolic process	biological_process	9	0.18235
GO:0048284	organelle fusion	biological_process	3	0.18249
GO:1901421	positive regulation of response to alcohol	biological_process	2	0.18312
GO:0034250	positive regulation of cellular amide metabolic process	biological_process	1	0.1835
GO:0010052	guard cell differentiation	biological_process	2	0.1837
GO:0033566	gamma-tubulin complex localization	biological_process	1	0.18387
GO:0045087	innate immune response	biological_process	12	0.18391
GO:0019692	deoxyribose phosphate metabolic process	biological_process	1	0.18496
GO:0009394	2'-deoxyribonucleotide metabolic process	biological_process	1	0.18496
GO:0009264	deoxyribonucleotide catabolic process	biological_process	1	0.18496
GO:0009219	pyrimidine deoxyribonucleotide metabolic process	biological_process	1	0.18496
GO:0009071	serine family amino acid catabolic process	biological_process	1	0.18576
GO:0032200	telomere organization	biological_process	1	0.18578
GO:0043100	pyrimidine nucleobase salvage	biological_process	1	0.18589
GO:0042407	cristae formation	biological_process	1	0.18643
GO:0006081	cellular aldehyde metabolic process	biological_process	6	0.18659
GO:0050665	hydrogen peroxide biosynthetic process	biological_process	1	0.18722
GO:0051052	regulation of DNA metabolic process	biological_process	3	0.1873
GO:0009871	jasmonic acid and ethylene-dependent systemic resistance, ethylene mediated signaling pathway	biological_process	1	0.18757
GO:0045814	negative regulation of gene expression, epigenetic	biological_process	3	0.1876
GO:0031338	regulation of vesicle fusion	biological_process	1	0.18767
GO:0070525	tRNA threonylcarbamoyladenosine metabolic process	biological_process	1	0.18774
GO:0046085	adenosine metabolic process	biological_process	1	0.18774
GO:0046146	tetrahydrobiopterin metabolic process	biological_process	2	0.18802
GO:0006729	tetrahydrobiopterin biosynthetic process	biological_process	2	0.18802
GO:0016579	protein deubiquitination	biological_process	3	0.18822
GO:0010648	negative regulation of cell communication	biological_process	5	0.18847
GO:0023057	negative regulation of signaling	biological_process	5	0.18847
GO:0032989	cellular component morphogenesis	biological_process	16	0.1885
GO:0042360	vitamin E metabolic process	biological_process	1	0.18868
GO:0042362	fat-soluble vitamin biosynthetic process	biological_process	1	0.18868
GO:0006775	fat-soluble vitamin metabolic process	biological_process	1	0.18868
GO:0010189	vitamin E biosynthetic process	biological_process	1	0.18868
GO:0048640	negative regulation of developmental growth	biological_process	1	0.18912
GO:0006189	'de novo' IMP biosynthetic process	biological_process	3	0.1909
GO:0051881	regulation of mitochondrial membrane potential	biological_process	1	0.19127
GO:0030435	sporulation resulting in formation of a cellular spore	biological_process	1	0.1913
GO:0043934	sporulation	biological_process	1	0.1913
GO:0032465	regulation of cytokinesis	biological_process	1	0.19206
GO:0010346	shoot axis formation	biological_process	2	0.19245
GO:0010223	secondary shoot formation	biological_process	2	0.19245
GO:0001763	morphogenesis of a branching structure	biological_process	2	0.19245
GO:0042592	homeostatic process	biological_process	28	0.19297
GO:0034440	lipid oxidation	biological_process	4	0.19379
GO:0044262	cellular carbohydrate metabolic process	biological_process	63	0.19428
GO:0019321	pentose metabolic process	biological_process	7	0.19449
GO:0006906	vesicle fusion	biological_process	1	0.19545
GO:0043650	dicarboxylic acid biosynthetic process	biological_process	3	0.19604
GO:0016567	protein ubiquitination	biological_process	16	0.19611
GO:0016073	snRNA metabolic process	biological_process	1	0.19614
GO:0010962	regulation of glucan biosynthetic process	biological_process	2	0.19641
GO:1903338	regulation of cell wall organization or biogenesis	biological_process	1	0.19641
GO:1902222	erythrose 4-phosphate/phosphoenolpyruvate family amino acid catabolic process	biological_process	5	0.19853
GO:0006559	L-phenylalanine catabolic process	biological_process	5	0.19853
GO:0040017	positive regulation of locomotion	biological_process	2	0.19896
GO:0051272	positive regulation of cellular component movement	biological_process	2	0.19896
GO:0030010	establishment of cell polarity	biological_process	2	0.19896
GO:2000147	positive regulation of cell motility	biological_process	2	0.19896
GO:0030334	regulation of cell migration	biological_process	2	0.19896
GO:0030811	regulation of nucleotide catabolic process	biological_process	3	0.19907
GO:0009118	regulation of nucleoside metabolic process	biological_process	3	0.19907
GO:0033121	regulation of purine nucleotide catabolic process	biological_process	3	0.19907
GO:0015696	ammonium transport	biological_process	1	0.19919
GO:0044703	multi-organism reproductive process	biological_process	16	0.20042
GO:0000302	response to reactive oxygen species	biological_process	15	0.20171
GO:0009806	lignan metabolic process	biological_process	1	0.20206
GO:0009807	lignan biosynthetic process	biological_process	1	0.20206
GO:0072599	establishment of protein localization to endoplasmic reticulum	biological_process	2	0.20244
GO:0045047	protein targeting to ER	biological_process	2	0.20244
GO:1902600	hydrogen ion transmembrane transport	biological_process	7	0.20256
GO:0009228	thiamine biosynthetic process	biological_process	2	0.20294
GO:0042724	thiamine-containing compound biosynthetic process	biological_process	2	0.20294
GO:0006022	aminoglycan metabolic process	biological_process	5	0.20411
GO:0006026	aminoglycan catabolic process	biological_process	5	0.20411
GO:0006030	chitin metabolic process	biological_process	5	0.20411
GO:0006032	chitin catabolic process	biological_process	5	0.20411
GO:0046348	amino sugar catabolic process	biological_process	5	0.20411
GO:1901071	glucosamine-containing compound metabolic process	biological_process	5	0.20411
GO:1901072	glucosamine-containing compound catabolic process	biological_process	5	0.20411
GO:0051336	regulation of hydrolase activity	biological_process	8	0.20507
GO:0098662	inorganic cation transmembrane transport	biological_process	11	0.20511
GO:0000387	spliceosomal snRNP assembly	biological_process	4	0.20543
GO:0006974	cellular response to DNA damage stimulus	biological_process	13	0.20552
GO:0046394	carboxylic acid biosynthetic process	biological_process	48	0.20554
GO:0016053	organic acid biosynthetic process	biological_process	48	0.20554
GO:0031023	microtubule organizing center organization	biological_process	3	0.20573
GO:0043647	inositol phosphate metabolic process	biological_process	4	0.20661
GO:0000904	cell morphogenesis involved in differentiation	biological_process	10	0.20676
GO:0044707	single-multicellular organism process	biological_process	100	0.20721
GO:1900150	regulation of defense response to fungus	biological_process	3	0.20723
GO:0046903	secretion	biological_process	5	0.20764
GO:0048831	regulation of shoot system development	biological_process	6	0.20766
GO:0071482	cellular response to light stimulus	biological_process	7	0.20797
GO:0051275	beta-glucan catabolic process	biological_process	4	0.20917
GO:0030245	cellulose catabolic process	biological_process	4	0.20917
GO:0030091	protein repair	biological_process	3	0.2093
GO:0071396	cellular response to lipid	biological_process	22	0.20948
GO:0046655	folic acid metabolic process	biological_process	1	0.20966
GO:0046656	folic acid biosynthetic process	biological_process	1	0.20966
GO:0043603	cellular amide metabolic process	biological_process	17	0.21058
GO:0006955	immune response	biological_process	14	0.21136
GO:0006195	purine nucleotide catabolic process	biological_process	3	0.21145
GO:0009154	purine ribonucleotide catabolic process	biological_process	3	0.21145
GO:0009146	purine nucleoside triphosphate catabolic process	biological_process	3	0.21145
GO:0009261	ribonucleotide catabolic process	biological_process	3	0.21145
GO:0009203	ribonucleoside triphosphate catabolic process	biological_process	3	0.21145
GO:0009207	purine ribonucleoside triphosphate catabolic process	biological_process	3	0.21145
GO:0019430	removal of superoxide radicals	biological_process	1	0.21233
GO:0071450	cellular response to oxygen radical	biological_process	1	0.21233
GO:0071451	cellular response to superoxide	biological_process	1	0.21233
GO:0042558	pteridine-containing compound metabolic process	biological_process	3	0.21335
GO:0061572	actin filament bundle organization	biological_process	1	0.21337
GO:0051017	actin filament bundle assembly	biological_process	1	0.21337
GO:0009052	pentose-phosphate shunt, non-oxidative branch	biological_process	2	0.21354
GO:0071281	cellular response to iron ion	biological_process	1	0.21367
GO:0043547	positive regulation of GTPase activity	biological_process	3	0.21473
GO:0048589	developmental growth	biological_process	10	0.21509
GO:0007131	reciprocal meiotic recombination	biological_process	2	0.21515
GO:0035825	reciprocal DNA recombination	biological_process	2	0.21515
GO:0009627	systemic acquired resistance	biological_process	4	0.2167
GO:0006564	L-serine biosynthetic process	biological_process	1	0.21675
GO:0017000	antibiotic biosynthetic process	biological_process	2	0.21697
GO:0042180	cellular ketone metabolic process	biological_process	12	0.21771
GO:0016042	lipid catabolic process	biological_process	17	0.21823
GO:0009789	positive regulation of abscisic acid-activated signaling pathway	biological_process	1	0.21899
GO:0042542	response to hydrogen peroxide	biological_process	11	0.21934
GO:0010311	lateral root formation	biological_process	1	0.21936
GO:0010074	maintenance of meristem identity	biological_process	1	0.22007
GO:0042060	wound healing	biological_process	1	0.22044
GO:0006767	water-soluble vitamin metabolic process	biological_process	7	0.22074
GO:0042219	cellular modified amino acid catabolic process	biological_process	1	0.22088
GO:0010015	root morphogenesis	biological_process	6	0.22285
GO:0033692	cellular polysaccharide biosynthetic process	biological_process	27	0.22383
GO:0031033	myosin filament organization	biological_process	2	0.22386
GO:0022607	cellular component assembly	biological_process	46	0.22393
GO:0007163	establishment or maintenance of cell polarity	biological_process	5	0.22405
GO:0009093	cysteine catabolic process	biological_process	1	0.22502
GO:0009880	embryonic pattern specification	biological_process	1	0.22508
GO:1900376	regulation of secondary metabolite biosynthetic process	biological_process	1	0.22513
GO:0006661	phosphatidylinositol biosynthetic process	biological_process	2	0.22531
GO:0019310	inositol catabolic process	biological_process	1	0.2272
GO:0070271	protein complex biogenesis	biological_process	24	0.22739
GO:0051273	beta-glucan metabolic process	biological_process	15	0.22755
GO:0006721	terpenoid metabolic process	biological_process	11	0.22759
GO:0000741	karyogamy	biological_process	2	0.22809
GO:0009559	embryo sac central cell differentiation	biological_process	2	0.22809
GO:0010197	polar nucleus fusion	biological_process	2	0.22809
GO:0006760	folic acid-containing compound metabolic process	biological_process	1	0.22829
GO:0030155	regulation of cell adhesion	biological_process	2	0.22854
GO:0046620	regulation of organ growth	biological_process	4	0.22882
GO:0007015	actin filament organization	biological_process	14	0.22893
GO:0008360	regulation of cell shape	biological_process	3	0.23043
GO:0009628	response to abiotic stimulus	biological_process	83	0.23055
GO:0071332	cellular response to fructose stimulus	biological_process	1	0.23073
GO:0033500	carbohydrate homeostasis	biological_process	4	0.23106
GO:0006206	pyrimidine nucleobase metabolic process	biological_process	2	0.23201
GO:0010086	embryonic root morphogenesis	biological_process	1	0.23218
GO:0010038	response to metal ion	biological_process	7	0.23233
GO:0016051	carbohydrate biosynthetic process	biological_process	47	0.23293
GO:0005987	sucrose catabolic process	biological_process	2	0.23308
GO:0006614	SRP-dependent cotranslational protein targeting to membrane	biological_process	2	0.2334
GO:0016125	sterol metabolic process	biological_process	2	0.23372
GO:0015748	organophosphate ester transport	biological_process	5	0.23433
GO:0010192	mucilage biosynthetic process	biological_process	1	0.23452
GO:0071478	cellular response to radiation	biological_process	7	0.23479
GO:0071496	cellular response to external stimulus	biological_process	18	0.23585
GO:0034330	cell junction organization	biological_process	3	0.23749
GO:0045216	cell-cell junction organization	biological_process	3	0.23749
GO:0042364	water-soluble vitamin biosynthetic process	biological_process	6	0.23844
GO:0006099	tricarboxylic acid cycle	biological_process	5	0.23919
GO:0006778	porphyrin-containing compound metabolic process	biological_process	28	0.23968
GO:0044419	interspecies interaction between organisms	biological_process	2	0.23982
GO:0044403	symbiosis, encompassing mutualism through parasitism	biological_process	2	0.23982
GO:0080134	regulation of response to stress	biological_process	18	0.2401
GO:0006901	vesicle coating	biological_process	2	0.24029
GO:0070972	protein localization to endoplasmic reticulum	biological_process	4	0.24033
GO:0006520	cellular amino acid metabolic process	biological_process	67	0.24072
GO:0032940	secretion by cell	biological_process	5	0.24108
GO:0000910	cytokinesis	biological_process	8	0.24158
GO:0071383	cellular response to steroid hormone stimulus	biological_process	8	0.24159
GO:0043487	regulation of RNA stability	biological_process	4	0.24181
GO:0006497	protein lipidation	biological_process	5	0.24183
GO:0042158	lipoprotein biosynthetic process	biological_process	5	0.24183
GO:0034219	carbohydrate transmembrane transport	biological_process	1	0.24213
GO:0000209	protein polyubiquitination	biological_process	1	0.24255
GO:0044036	cell wall macromolecule metabolic process	biological_process	17	0.24294
GO:0048232	male gamete generation	biological_process	2	0.24319
GO:0001510	RNA methylation	biological_process	3	0.24411
GO:0000041	transition metal ion transport	biological_process	3	0.24435
GO:0032261	purine nucleotide salvage	biological_process	2	0.2456
GO:0032264	IMP salvage	biological_process	2	0.2456
GO:0030031	cell projection assembly	biological_process	2	0.24561
GO:1902905	positive regulation of supramolecular fiber organization	biological_process	1	0.24567
GO:0019319	hexose biosynthetic process	biological_process	3	0.24578
GO:0010581	regulation of starch biosynthetic process	biological_process	2	0.24669
GO:2000904	regulation of starch metabolic process	biological_process	2	0.24669
GO:0010191	mucilage metabolic process	biological_process	1	0.24685
GO:0034661	ncRNA catabolic process	biological_process	1	0.24742
GO:0060341	regulation of cellular localization	biological_process	4	0.24797
GO:0072528	pyrimidine-containing compound biosynthetic process	biological_process	10	0.24798
GO:0048658	anther wall tapetum development	biological_process	2	0.24798
GO:0007034	vacuolar transport	biological_process	6	0.24807
GO:0071365	cellular response to auxin stimulus	biological_process	25	0.24815
GO:0034637	cellular carbohydrate biosynthetic process	biological_process	40	0.24858
GO:0016999	antibiotic metabolic process	biological_process	4	0.24866
GO:0071489	cellular response to red or far red light	biological_process	3	0.2502
GO:0072488	ammonium transmembrane transport	biological_process	1	0.25085
GO:1903312	negative regulation of mRNA metabolic process	biological_process	2	0.25085
GO:0007205	protein kinase C-activating G-protein coupled receptor signaling pathway	biological_process	1	0.25103
GO:0007127	meiosis I	biological_process	2	0.2543
GO:0009309	amine biosynthetic process	biological_process	4	0.25463
GO:0042401	cellular biogenic amine biosynthetic process	biological_process	4	0.25463
GO:0010274	hydrotropism	biological_process	1	0.2548
GO:0009553	embryo sac development	biological_process	5	0.25524
GO:0033865	nucleoside bisphosphate metabolic process	biological_process	4	0.25645
GO:0033875	ribonucleoside bisphosphate metabolic process	biological_process	4	0.25645
GO:0034032	purine nucleoside bisphosphate metabolic process	biological_process	4	0.25645
GO:0009694	jasmonic acid metabolic process	biological_process	3	0.25708
GO:0070973	protein localization to endoplasmic reticulum exit site	biological_process	2	0.25759
GO:2000241	regulation of reproductive process	biological_process	6	0.25789
GO:0031503	protein complex localization	biological_process	1	0.25793
GO:0051054	positive regulation of DNA metabolic process	biological_process	2	0.25909
GO:0009817	defense response to fungus, incompatible interaction	biological_process	4	0.26011
GO:0060236	regulation of mitotic spindle organization	biological_process	2	0.26069
GO:0090224	regulation of spindle organization	biological_process	2	0.26069
GO:0000956	nuclear-transcribed mRNA catabolic process	biological_process	2	0.26073
GO:0098542	defense response to other organism	biological_process	41	0.26081
GO:0009250	glucan biosynthetic process	biological_process	24	0.26111
GO:0009611	response to wounding	biological_process	12	0.26112
GO:0007031	peroxisome organization	biological_process	5	0.26117
GO:0045333	cellular respiration	biological_process	5	0.26306
GO:0009750	response to fructose	biological_process	1	0.2635
GO:0006108	malate metabolic process	biological_process	1	0.26446
GO:0051345	positive regulation of hydrolase activity	biological_process	4	0.2649
GO:0006772	thiamine metabolic process	biological_process	2	0.26496
GO:0042723	thiamine-containing compound metabolic process	biological_process	2	0.26496
GO:0006885	regulation of pH	biological_process	3	0.26554
GO:0009853	photorespiration	biological_process	4	0.26648
GO:1901617	organic hydroxy compound biosynthetic process	biological_process	13	0.26667
GO:0010022	meristem determinacy	biological_process	2	0.26732
GO:0045926	negative regulation of growth	biological_process	3	0.2677
GO:0006732	coenzyme metabolic process	biological_process	21	0.2697
GO:0051094	positive regulation of developmental process	biological_process	5	0.2698
GO:0006282	regulation of DNA repair	biological_process	2	0.27058
GO:0009439	cyanate metabolic process	biological_process	1	0.27079
GO:0019318	hexose metabolic process	biological_process	21	0.27151
GO:0042559	pteridine-containing compound biosynthetic process	biological_process	3	0.2721
GO:1900542	regulation of purine nucleotide metabolic process	biological_process	3	0.27251
GO:0006140	regulation of nucleotide metabolic process	biological_process	3	0.27251
GO:0043241	protein complex disassembly	biological_process	5	0.27273
GO:0007346	regulation of mitotic cell cycle	biological_process	3	0.27375
GO:0030026	cellular manganese ion homeostasis	biological_process	1	0.27386
GO:0048545	response to steroid hormone	biological_process	8	0.27393
GO:0006751	glutathione catabolic process	biological_process	1	0.27409
GO:0048646	anatomical structure formation involved in morphogenesis	biological_process	11	0.27429
GO:0046373	L-arabinose metabolic process	biological_process	3	0.27518
GO:0046622	positive regulation of organ growth	biological_process	1	0.2752
GO:0008104	protein localization	biological_process	52	0.27528
GO:0006098	pentose-phosphate shunt	biological_process	4	0.27532
GO:0006740	NADPH regeneration	biological_process	4	0.27532
GO:1901332	negative regulation of lateral root development	biological_process	1	0.27665
GO:0009735	response to cytokinin	biological_process	7	0.27669
GO:0016556	mRNA modification	biological_process	3	0.27769
GO:0072523	purine-containing compound catabolic process	biological_process	4	0.2782
GO:0006970	response to osmotic stress	biological_process	14	0.27989
GO:0006525	arginine metabolic process	biological_process	3	0.2805
GO:0016106	sesquiterpenoid biosynthetic process	biological_process	3	0.28074
GO:0048507	meristem development	biological_process	6	0.28079
GO:0048316	seed development	biological_process	20	0.28202
GO:0042762	regulation of sulfur metabolic process	biological_process	1	0.28257
GO:0006787	porphyrin-containing compound catabolic process	biological_process	4	0.28303
GO:0033015	tetrapyrrole catabolic process	biological_process	4	0.28303
GO:0042732	D-xylose metabolic process	biological_process	1	0.28305
GO:0046777	protein autophosphorylation	biological_process	3	0.28446
GO:2000580	regulation of ATP-dependent microtubule motor activity, plus-end-directed	biological_process	1	0.28485
GO:2000582	positive regulation of ATP-dependent microtubule motor activity, plus-end-directed	biological_process	1	0.28485
GO:2000574	regulation of microtubule motor activity	biological_process	1	0.28485
GO:2000576	positive regulation of microtubule motor activity	biological_process	1	0.28485
GO:0051129	negative regulation of cellular component organization	biological_process	2	0.28617
GO:0048569	post-embryonic animal organ development	biological_process	11	0.28618
GO:0010167	response to nitrate	biological_process	1	0.28717
GO:0000723	telomere maintenance	biological_process	1	0.28758
GO:0045492	xylan biosynthetic process	biological_process	3	0.28798
GO:1903047	mitotic cell cycle process	biological_process	5	0.28837
GO:0009663	plasmodesma organization	biological_process	1	0.28923
GO:0043649	dicarboxylic acid catabolic process	biological_process	1	0.28954
GO:0032879	regulation of localization	biological_process	9	0.29002
GO:0030244	cellulose biosynthetic process	biological_process	8	0.2903
GO:0043254	regulation of protein complex assembly	biological_process	2	0.29072
GO:0031323	regulation of cellular metabolic process	biological_process	218	0.29096
GO:0019395	fatty acid oxidation	biological_process	3	0.29155
GO:0009062	fatty acid catabolic process	biological_process	4	0.29155
GO:0009640	photomorphogenesis	biological_process	2	0.29205
GO:0061013	regulation of mRNA catabolic process	biological_process	2	0.29272
GO:0015994	chlorophyll metabolic process	biological_process	23	0.29325
GO:0040012	regulation of locomotion	biological_process	2	0.2953
GO:0032878	regulation of establishment or maintenance of cell polarity	biological_process	2	0.2953
GO:2000145	regulation of cell motility	biological_process	2	0.2953
GO:0000271	polysaccharide biosynthetic process	biological_process	29	0.29538
GO:0097435	supramolecular fiber organization	biological_process	3	0.29716
GO:0072665	protein localization to vacuole	biological_process	2	0.29795
GO:0072666	establishment of protein localization to vacuole	biological_process	2	0.29795
GO:0006623	protein targeting to vacuole	biological_process	2	0.29795
GO:0050801	ion homeostasis	biological_process	12	0.29799
GO:0007140	male meiotic nuclear division	biological_process	3	0.29821
GO:0048229	gametophyte development	biological_process	10	0.29905
GO:0008215	spermine metabolic process	biological_process	1	0.29913
GO:0006597	spermine biosynthetic process	biological_process	1	0.29913
GO:0000212	meiotic spindle organization	biological_process	2	0.30219
GO:0035435	phosphate ion transmembrane transport	biological_process	2	0.30224
GO:0048015	phosphatidylinositol-mediated signaling	biological_process	1	0.30229
GO:0010051	xylem and phloem pattern formation	biological_process	4	0.3027
GO:0040008	regulation of growth	biological_process	9	0.30336
GO:0048469	cell maturation	biological_process	3	0.30346
GO:0010053	root epidermal cell differentiation	biological_process	3	0.30346
GO:0009314	response to radiation	biological_process	38	0.30355
GO:0090305	nucleic acid phosphodiester bond hydrolysis	biological_process	25	0.30373
GO:0051128	regulation of cellular component organization	biological_process	16	0.30386
GO:0009056	catabolic process	biological_process	141	0.30391
GO:1902221	erythrose 4-phosphate/phosphoenolpyruvate family amino acid metabolic process	biological_process	5	0.30398
GO:0006558	L-phenylalanine metabolic process	biological_process	5	0.30398
GO:0044801	single-organism membrane fusion	biological_process	2	0.30449
GO:0030643	cellular phosphate ion homeostasis	biological_process	1	0.30456
GO:0072501	cellular divalent inorganic anion homeostasis	biological_process	1	0.30456
GO:0072502	cellular trivalent inorganic anion homeostasis	biological_process	1	0.30456
GO:0030002	cellular anion homeostasis	biological_process	1	0.30456
GO:0030320	cellular monovalent inorganic anion homeostasis	biological_process	1	0.30456
GO:0031349	positive regulation of defense response	biological_process	1	0.30565
GO:1900673	olefin metabolic process	biological_process	1	0.30582
GO:0019852	L-ascorbic acid metabolic process	biological_process	1	0.30613
GO:0044093	positive regulation of molecular function	biological_process	12	0.30642
GO:0010212	response to ionizing radiation	biological_process	1	0.30857
GO:0030042	actin filament depolymerization	biological_process	2	0.3091
GO:0009969	xyloglucan biosynthetic process	biological_process	1	0.30911
GO:0051270	regulation of cellular component movement	biological_process	2	0.30914
GO:0090174	organelle membrane fusion	biological_process	1	0.30943
GO:0016072	rRNA metabolic process	biological_process	11	0.30953
GO:1901070	guanosine-containing compound biosynthetic process	biological_process	2	0.31
GO:0006419	alanyl-tRNA aminoacylation	biological_process	1	0.31134
GO:0045491	xylan metabolic process	biological_process	5	0.31158
GO:0032206	positive regulation of telomere maintenance	biological_process	1	0.31166
GO:0032846	positive regulation of homeostatic process	biological_process	1	0.31166
GO:0016441	posttranscriptional gene silencing	biological_process	3	0.31334
GO:0009435	NAD biosynthetic process	biological_process	1	0.31429
GO:1902115	regulation of organelle assembly	biological_process	1	0.31443
GO:0009914	hormone transport	biological_process	2	0.31468
GO:0090306	spindle assembly involved in meiosis	biological_process	1	0.31508
GO:0043062	extracellular structure organization	biological_process	1	0.3159
GO:0030198	extracellular matrix organization	biological_process	1	0.3159
GO:0040029	regulation of gene expression, epigenetic	biological_process	6	0.31686
GO:0000045	autophagosome assembly	biological_process	6	0.3181
GO:0006063	uronic acid metabolic process	biological_process	19	0.31846
GO:0006072	glycerol-3-phosphate metabolic process	biological_process	2	0.31858
GO:0071822	protein complex subunit organization	biological_process	45	0.31874
GO:0042391	regulation of membrane potential	biological_process	1	0.31958
GO:0016926	protein desumoylation	biological_process	1	0.32004
GO:0007135	meiosis II	biological_process	1	0.32023
GO:0008285	negative regulation of cell proliferation	biological_process	2	0.32057
GO:0000272	polysaccharide catabolic process	biological_process	14	0.32072
GO:0045324	late endosome to vacuole transport	biological_process	2	0.32109
GO:0031146	SCF-dependent proteasomal ubiquitin-dependent protein catabolic process	biological_process	1	0.32133
GO:0042593	glucose homeostasis	biological_process	2	0.32133
GO:1901698	response to nitrogen compound	biological_process	10	0.32165
GO:0034754	cellular hormone metabolic process	biological_process	12	0.32174
GO:0040031	snRNA modification	biological_process	1	0.32247
GO:0016236	macroautophagy	biological_process	8	0.32313
GO:1901293	nucleoside phosphate biosynthetic process	biological_process	25	0.3233
GO:0031123	RNA 3'-end processing	biological_process	1	0.32375
GO:0055086	nucleobase-containing small molecule metabolic process	biological_process	44	0.32443
GO:0009746	response to hexose	biological_process	2	0.32521
GO:0034284	response to monosaccharide	biological_process	2	0.32521
GO:0010337	regulation of salicylic acid metabolic process	biological_process	1	0.32545
GO:0055067	monovalent inorganic cation homeostasis	biological_process	4	0.32627
GO:0006364	rRNA processing	biological_process	11	0.32629
GO:0006753	nucleoside phosphate metabolic process	biological_process	36	0.32644
GO:0008202	steroid metabolic process	biological_process	8	0.32673
GO:0000578	embryonic axis specification	biological_process	1	0.32683
GO:0046165	alcohol biosynthetic process	biological_process	7	0.32747
GO:0010154	fruit development	biological_process	20	0.32758
GO:0010556	regulation of macromolecule biosynthetic process	biological_process	190	0.32772
GO:0009561	megagametogenesis	biological_process	3	0.32823
GO:0006887	exocytosis	biological_process	5	0.3287
GO:0009263	deoxyribonucleotide biosynthetic process	biological_process	1	0.32923
GO:0009889	regulation of biosynthetic process	biological_process	195	0.32982
GO:0043488	regulation of mRNA stability	biological_process	3	0.33012
GO:0072524	pyridine-containing compound metabolic process	biological_process	8	0.33014
GO:0043450	alkene biosynthetic process	biological_process	1	0.33098
GO:0043449	cellular alkene metabolic process	biological_process	1	0.33098
GO:1900674	olefin biosynthetic process	biological_process	1	0.33098
GO:0009692	ethylene metabolic process	biological_process	1	0.33098
GO:0009693	ethylene biosynthetic process	biological_process	1	0.33098
GO:0042157	lipoprotein metabolic process	biological_process	5	0.33129
GO:0010118	stomatal movement	biological_process	4	0.33147
GO:0006284	base-excision repair	biological_process	3	0.33166
GO:1901566	organonitrogen compound biosynthetic process	biological_process	84	0.33177
GO:0010582	floral meristem determinacy	biological_process	2	0.33362
GO:0006352	DNA-templated transcription, initiation	biological_process	2	0.33588
GO:0010310	regulation of hydrogen peroxide metabolic process	biological_process	1	0.3366
GO:0061025	membrane fusion	biological_process	2	0.33673
GO:0097577	sequestering of iron ion	biological_process	1	0.33716
GO:0006880	intracellular sequestering of iron ion	biological_process	1	0.33716
GO:0070588	calcium ion transmembrane transport	biological_process	1	0.33723
GO:0042127	regulation of cell proliferation	biological_process	2	0.33749
GO:0006848	pyruvate transport	biological_process	2	0.33776
GO:0046352	disaccharide catabolic process	biological_process	3	0.33801
GO:0009313	oligosaccharide catabolic process	biological_process	3	0.33801
GO:0034249	negative regulation of cellular amide metabolic process	biological_process	2	0.33816
GO:1903008	organelle disassembly	biological_process	2	0.33853
GO:0051783	regulation of nuclear division	biological_process	1	0.3387
GO:0046416	D-amino acid metabolic process	biological_process	1	0.33961
GO:0034660	ncRNA metabolic process	biological_process	31	0.34023
GO:0010054	trichoblast differentiation	biological_process	3	0.34039
GO:0034762	regulation of transmembrane transport	biological_process	1	0.34207
GO:0044550	secondary metabolite biosynthetic process	biological_process	8	0.34296
GO:0048438	floral whorl development	biological_process	6	0.34426
GO:0043087	regulation of GTPase activity	biological_process	3	0.34453
GO:0033124	obsolete regulation of GTP catabolic process	biological_process	3	0.34453
GO:0065009	regulation of molecular function	biological_process	18	0.34481
GO:0006714	sesquiterpenoid metabolic process	biological_process	3	0.34489
GO:1903311	regulation of mRNA metabolic process	biological_process	2	0.34499
GO:0032101	regulation of response to external stimulus	biological_process	5	0.34503
GO:0010565	regulation of cellular ketone metabolic process	biological_process	2	0.34552
GO:0006672	ceramide metabolic process	biological_process	1	0.34575
GO:0006790	sulfur compound metabolic process	biological_process	23	0.34647
GO:0051049	regulation of transport	biological_process	8	0.34853
GO:0043328	protein transport to vacuole involved in ubiquitin-dependent protein catabolic process via the multivesicular body sorting pathway	biological_process	1	0.34884
GO:0010257	NADH dehydrogenase complex assembly	biological_process	2	0.34959
GO:0046474	glycerophospholipid biosynthetic process	biological_process	4	0.35039
GO:0048834	specification of petal number	biological_process	1	0.35066
GO:0009896	positive regulation of catabolic process	biological_process	2	0.35071
GO:0006791	sulfur utilization	biological_process	1	0.35105
GO:0006792	regulation of sulfur utilization	biological_process	1	0.35105
GO:0010439	regulation of glucosinolate biosynthetic process	biological_process	1	0.35105
GO:0010199	organ boundary specification between lateral organs and the meristem	biological_process	1	0.35137
GO:0006779	porphyrin-containing compound biosynthetic process	biological_process	22	0.35167
GO:0071326	cellular response to monosaccharide stimulus	biological_process	1	0.35206
GO:0071331	cellular response to hexose stimulus	biological_process	1	0.35206
GO:0071333	cellular response to glucose stimulus	biological_process	1	0.35206
GO:0070084	protein initiator methionine removal	biological_process	2	0.35251
GO:0019566	arabinose metabolic process	biological_process	3	0.35274
GO:0009814	defense response, incompatible interaction	biological_process	9	0.35332
GO:0032886	regulation of microtubule-based process	biological_process	3	0.35403
GO:0010324	membrane invagination	biological_process	2	0.35405
GO:0048585	negative regulation of response to stimulus	biological_process	9	0.35458
GO:0031935	regulation of chromatin silencing	biological_process	1	0.35469
GO:1903409	reactive oxygen species biosynthetic process	biological_process	1	0.35618
GO:0018107	peptidyl-threonine phosphorylation	biological_process	2	0.35624
GO:0018210	peptidyl-threonine modification	biological_process	2	0.35624
GO:0061077	chaperone-mediated protein folding	biological_process	4	0.35796
GO:0006897	endocytosis	biological_process	1	0.35862
GO:0008295	spermidine biosynthetic process	biological_process	2	0.35908
GO:0008216	spermidine metabolic process	biological_process	2	0.35908
GO:0010817	regulation of hormone levels	biological_process	21	0.35965
GO:0000726	non-recombinational repair	biological_process	1	0.3597
GO:0006303	double-strand break repair via nonhomologous end joining	biological_process	1	0.3597
GO:0044242	cellular lipid catabolic process	biological_process	5	0.36106
GO:0051156	glucose 6-phosphate metabolic process	biological_process	1	0.36238
GO:0009629	response to gravity	biological_process	3	0.36364
GO:0009630	gravitropism	biological_process	3	0.36364
GO:0010438	cellular response to sulfur starvation	biological_process	1	0.36479
GO:0051186	cofactor metabolic process	biological_process	51	0.36496
GO:0006518	peptide metabolic process	biological_process	11	0.365
GO:0030100	regulation of endocytosis	biological_process	1	0.36568
GO:0042742	defense response to bacterium	biological_process	15	0.36615
GO:0033614	chloroplast proton-transporting ATP synthase complex assembly	biological_process	1	0.36664
GO:1901607	alpha-amino acid biosynthetic process	biological_process	16	0.36707
GO:0043085	positive regulation of catalytic activity	biological_process	12	0.3679
GO:0010020	chloroplast fission	biological_process	1	0.36825
GO:0043572	plastid fission	biological_process	1	0.36825
GO:0002237	response to molecule of bacterial origin	biological_process	1	0.36909
GO:0006562	proline catabolic process	biological_process	1	0.3701
GO:0042221	response to chemical	biological_process	138	0.37041
GO:0007097	nuclear migration	biological_process	1	0.37098
GO:0040023	nuclear migration	biological_process	1	0.37098
GO:0051647	nucleus localization	biological_process	1	0.37098
GO:0009720	detection of hormone stimulus	biological_process	1	0.37169
GO:0009726	detection of endogenous stimulus	biological_process	1	0.37169
GO:0009729	detection of brassinosteroid stimulus	biological_process	1	0.37169
GO:0048869	cellular developmental process	biological_process	33	0.37253
GO:0010252	auxin homeostasis	biological_process	2	0.37311
GO:0090391	granum assembly	biological_process	1	0.37327
GO:0031669	cellular response to nutrient levels	biological_process	16	0.37367
GO:0006163	purine nucleotide metabolic process	biological_process	22	0.37464
GO:0031053	primary miRNA processing	biological_process	2	0.37486
GO:0006904	vesicle docking involved in exocytosis	biological_process	2	0.3749
GO:0009123	nucleoside monophosphate metabolic process	biological_process	14	0.37528
GO:0022613	ribonucleoprotein complex biogenesis	biological_process	21	0.37535
GO:0010305	leaf vascular tissue pattern formation	biological_process	2	0.37542
GO:0036297	interstrand cross-link repair	biological_process	1	0.37618
GO:0033013	tetrapyrrole metabolic process	biological_process	28	0.37643
GO:0001736	establishment of planar polarity	biological_process	1	0.37712
GO:0001738	morphogenesis of a polarized epithelium	biological_process	1	0.37712
GO:0007164	establishment of tissue polarity	biological_process	1	0.37712
GO:0009799	specification of symmetry	biological_process	1	0.37712
GO:0009855	determination of bilateral symmetry	biological_process	1	0.37712
GO:0009167	purine ribonucleoside monophosphate metabolic process	biological_process	12	0.37713
GO:0009126	purine nucleoside monophosphate metabolic process	biological_process	12	0.37713
GO:0071367	cellular response to brassinosteroid stimulus	biological_process	6	0.37749
GO:0009742	brassinosteroid mediated signaling pathway	biological_process	6	0.37749
GO:0043401	steroid hormone mediated signaling pathway	biological_process	6	0.37754
GO:0048465	corolla development	biological_process	1	0.37785
GO:0048441	petal development	biological_process	1	0.37785
GO:2001252	positive regulation of chromosome organization	biological_process	1	0.37819
GO:0010160	formation of animal organ boundary	biological_process	1	0.37821
GO:0016485	protein processing	biological_process	2	0.37912
GO:0022603	regulation of anatomical structure morphogenesis	biological_process	6	0.37959
GO:0009819	drought recovery	biological_process	1	0.37972
GO:0046176	aldonic acid catabolic process	biological_process	1	0.3803
GO:0046177	D-gluconate catabolic process	biological_process	1	0.3803
GO:0001704	formation of primary germ layer	biological_process	1	0.38078
GO:0001706	endoderm formation	biological_process	1	0.38078
GO:0007492	endoderm development	biological_process	1	0.38078
GO:0035987	endodermal cell differentiation	biological_process	1	0.38078
GO:0002831	regulation of response to biotic stimulus	biological_process	5	0.38091
GO:1901861	regulation of muscle tissue development	biological_process	1	0.38136
GO:0010830	regulation of myotube differentiation	biological_process	1	0.38136
GO:2001014	regulation of skeletal muscle cell differentiation	biological_process	1	0.38136
GO:0016202	regulation of striated muscle tissue development	biological_process	1	0.38136
GO:0014902	myotube differentiation	biological_process	1	0.38136
GO:0051153	regulation of striated muscle cell differentiation	biological_process	1	0.38136
GO:0051146	striated muscle cell differentiation	biological_process	1	0.38136
GO:0051147	regulation of muscle cell differentiation	biological_process	1	0.38136
GO:0048641	regulation of skeletal muscle tissue development	biological_process	1	0.38136
GO:0048634	regulation of muscle organ development	biological_process	1	0.38136
GO:0007517	muscle organ development	biological_process	1	0.38136
GO:0007519	skeletal muscle tissue development	biological_process	1	0.38136
GO:0060537	muscle tissue development	biological_process	1	0.38136
GO:0060538	skeletal muscle organ development	biological_process	1	0.38136
GO:0061061	muscle structure development	biological_process	1	0.38136
GO:0035914	skeletal muscle cell differentiation	biological_process	1	0.38136
GO:0098528	skeletal muscle fiber differentiation	biological_process	1	0.38136
GO:1902809	regulation of skeletal muscle fiber differentiation	biological_process	1	0.38136
GO:2000765	regulation of cytoplasmic translation	biological_process	1	0.38136
GO:2000738	positive regulation of stem cell differentiation	biological_process	1	0.38136
GO:0014706	striated muscle tissue development	biological_process	1	0.38136
GO:0042692	muscle cell differentiation	biological_process	1	0.38136
GO:0006575	cellular modified amino acid metabolic process	biological_process	11	0.38345
GO:0035148	tube formation	biological_process	2	0.38357
GO:0034329	cell junction assembly	biological_process	2	0.38357
GO:0071897	DNA biosynthetic process	biological_process	1	0.3859
GO:0070535	histone H2A K63-linked ubiquitination	biological_process	1	0.38641
GO:0016445	somatic diversification of immunoglobulins	biological_process	1	0.38641
GO:0016447	somatic recombination of immunoglobulin gene segments	biological_process	1	0.38641
GO:0033522	histone H2A ubiquitination	biological_process	1	0.38641
GO:0033523	histone H2B ubiquitination	biological_process	1	0.38641
GO:0070936	protein K48-linked ubiquitination	biological_process	1	0.38641
GO:0019724	B cell mediated immunity	biological_process	1	0.38641
GO:0032785	negative regulation of DNA-templated transcription, elongation	biological_process	1	0.38641
GO:0002381	immunoglobulin production involved in immunoglobulin mediated immune response	biological_process	1	0.38641
GO:0002377	immunoglobulin production	biological_process	1	0.38641
GO:0002312	B cell activation involved in immune response	biological_process	1	0.38641
GO:0002460	adaptive immune response based on somatic recombination of immune receptors built from immunoglobulin superfamily domains	biological_process	1	0.38641
GO:0002449	lymphocyte mediated immunity	biological_process	1	0.38641
GO:0042113	B cell activation	biological_process	1	0.38641
GO:0002250	adaptive immune response	biological_process	1	0.38641
GO:0002285	lymphocyte activation involved in immune response	biological_process	1	0.38641
GO:0002200	somatic diversification of immune receptors	biological_process	1	0.38641
GO:0002204	somatic recombination of immunoglobulin genes involved in immune response	biological_process	1	0.38641
GO:0002208	somatic diversification of immunoglobulins involved in immune response	biological_process	1	0.38641
GO:0045190	isotype switching	biological_process	1	0.38641
GO:0034244	negative regulation of transcription elongation from RNA polymerase II promoter	biological_process	1	0.38641
GO:0016064	immunoglobulin mediated immune response	biological_process	1	0.38641
GO:0002562	somatic diversification of immune receptors via germline recombination within a single locus	biological_process	1	0.38641
GO:0019374	galactolipid metabolic process	biological_process	1	0.38717
GO:0019375	galactolipid biosynthetic process	biological_process	1	0.38717
GO:0031326	regulation of cellular biosynthetic process	biological_process	195	0.38753
GO:0051457	maintenance of protein location in nucleus	biological_process	1	0.38773
GO:0006261	DNA-dependent DNA replication	biological_process	4	0.38815
GO:0015893	drug transport	biological_process	2	0.38823
GO:0006855	drug transmembrane transport	biological_process	2	0.38823
GO:0042546	cell wall biogenesis	biological_process	13	0.38901
GO:0000725	recombinational repair	biological_process	1	0.38975
GO:0009396	folic acid-containing compound biosynthetic process	biological_process	1	0.38993
GO:0010021	amylopectin biosynthetic process	biological_process	2	0.39003
GO:2000896	amylopectin metabolic process	biological_process	2	0.39003
GO:0009723	response to ethylene	biological_process	3	0.39039
GO:1900459	positive regulation of brassinosteroid mediated signaling pathway	biological_process	1	0.39061
GO:0000165	MAPK cascade	biological_process	3	0.39231
GO:0046039	GTP metabolic process	biological_process	5	0.39323
GO:0030488	tRNA methylation	biological_process	1	0.39337
GO:0045022	early endosome to late endosome transport	biological_process	1	0.39382
GO:0009660	amyloplast organization	biological_process	1	0.39382
GO:0045490	pectin catabolic process	biological_process	2	0.39441
GO:0010410	hemicellulose metabolic process	biological_process	11	0.39539
GO:0048437	floral organ development	biological_process	8	0.3956
GO:0072525	pyridine-containing compound biosynthetic process	biological_process	4	0.3957
GO:0090332	stomatal closure	biological_process	3	0.39976
GO:0009991	response to extracellular stimulus	biological_process	20	0.40313
GO:0050684	regulation of mRNA processing	biological_process	1	0.40366
GO:0045597	positive regulation of cell differentiation	biological_process	1	0.40374
GO:0048528	post-embryonic root development	biological_process	4	0.40452
GO:0031347	regulation of defense response	biological_process	15	0.40459
GO:0009699	phenylpropanoid biosynthetic process	biological_process	6	0.40475
GO:0048582	positive regulation of post-embryonic development	biological_process	3	0.40517
GO:0015851	nucleobase transport	biological_process	1	0.40573
GO:0030865	cortical cytoskeleton organization	biological_process	5	0.40604
GO:0008614	pyridoxine metabolic process	biological_process	1	0.40648
GO:0008615	pyridoxine biosynthetic process	biological_process	1	0.40648
GO:0006002	fructose 6-phosphate metabolic process	biological_process	4	0.40665
GO:0071470	cellular response to osmotic stress	biological_process	2	0.40786
GO:0043455	regulation of secondary metabolic process	biological_process	2	0.4081
GO:0034035	purine ribonucleoside bisphosphate metabolic process	biological_process	1	0.40863
GO:0015969	guanosine tetraphosphate metabolic process	biological_process	1	0.40863
GO:2000024	regulation of leaf development	biological_process	1	0.40913
GO:0046148	pigment biosynthetic process	biological_process	25	0.40926
GO:0071369	cellular response to ethylene stimulus	biological_process	1	0.40947
GO:0009873	ethylene-activated signaling pathway	biological_process	1	0.40947
GO:0031334	positive regulation of protein complex assembly	biological_process	2	0.40964
GO:0031667	response to nutrient levels	biological_process	18	0.40972
GO:0015804	neutral amino acid transport	biological_process	1	0.41038
GO:0006437	tyrosyl-tRNA aminoacylation	biological_process	1	0.41042
GO:0006505	GPI anchor metabolic process	biological_process	1	0.41297
GO:0006506	GPI anchor biosynthetic process	biological_process	1	0.41297
GO:0019344	cysteine biosynthetic process	biological_process	4	0.4137
GO:0072596	establishment of protein localization to chloroplast	biological_process	3	0.41397
GO:0045036	protein targeting to chloroplast	biological_process	3	0.41397
GO:0009593	detection of chemical stimulus	biological_process	1	0.41559
GO:0000025	maltose catabolic process	biological_process	1	0.41796
GO:0051604	protein maturation	biological_process	2	0.41817
GO:0032881	regulation of polysaccharide metabolic process	biological_process	2	0.41916
GO:0032885	regulation of polysaccharide biosynthetic process	biological_process	2	0.41916
GO:0070887	cellular response to chemical stimulus	biological_process	79	0.41949
GO:0052541	plant-type cell wall cellulose metabolic process	biological_process	2	0.41984
GO:0034308	primary alcohol metabolic process	biological_process	2	0.41998
GO:0006665	sphingolipid metabolic process	biological_process	1	0.42037
GO:0010119	regulation of stomatal movement	biological_process	2	0.42051
GO:0019637	organophosphate metabolic process	biological_process	68	0.42125
GO:0006643	membrane lipid metabolic process	biological_process	4	0.42133
GO:0051241	negative regulation of multicellular organismal process	biological_process	4	0.42217
GO:0009909	regulation of flower development	biological_process	3	0.42219
GO:1902347	response to strigolactone	biological_process	2	0.42281
GO:0046149	pigment catabolic process	biological_process	3	0.42527
GO:0015996	chlorophyll catabolic process	biological_process	3	0.42527
GO:0010393	galacturonan metabolic process	biological_process	4	0.42844
GO:0060918	auxin transport	biological_process	2	0.4287
GO:0031124	mRNA 3'-end processing	biological_process	1	0.42916
GO:0080090	regulation of primary metabolic process	biological_process	207	0.42932
GO:0031670	cellular response to nutrient	biological_process	3	0.42973
GO:1901658	glycosyl compound catabolic process	biological_process	5	0.43141
GO:0006570	tyrosine metabolic process	biological_process	1	0.43272
GO:0044257	cellular protein catabolic process	biological_process	17	0.43363
GO:0098586	cellular response to virus	biological_process	1	0.4338
GO:0030048	actin filament-based movement	biological_process	1	0.43392
GO:0009850	auxin metabolic process	biological_process	3	0.43459
GO:0010506	regulation of autophagy	biological_process	1	0.43467
GO:0030832	regulation of actin filament length	biological_process	2	0.43518
GO:0008064	regulation of actin polymerization or depolymerization	biological_process	2	0.43518
GO:0042632	cholesterol homeostasis	biological_process	1	0.43527
GO:0055092	sterol homeostasis	biological_process	1	0.43527
GO:2001141	regulation of RNA biosynthetic process	biological_process	181	0.43579
GO:0060249	anatomical structure homeostasis	biological_process	1	0.43613
GO:0006890	retrograde vesicle-mediated transport, Golgi to ER	biological_process	1	0.43647
GO:0051260	protein homooligomerization	biological_process	2	0.43698
GO:0015718	monocarboxylic acid transport	biological_process	2	0.43724
GO:0034613	cellular protein localization	biological_process	34	0.4373
GO:0042026	protein refolding	biological_process	4	0.43813
GO:0040007	growth	biological_process	17	0.43983
GO:0051179	localization	biological_process	200	0.44111
GO:0009100	glycoprotein metabolic process	biological_process	11	0.44169
GO:0042445	hormone metabolic process	biological_process	19	0.44176
GO:0031331	positive regulation of cellular catabolic process	biological_process	2	0.44193
GO:0002181	cytoplasmic translation	biological_process	3	0.44263
GO:0009070	serine family amino acid biosynthetic process	biological_process	5	0.44268
GO:0033365	protein localization to organelle	biological_process	14	0.44302
GO:0043162	ubiquitin-dependent protein catabolic process via the multivesicular body sorting pathway	biological_process	1	0.44345
GO:0010383	cell wall polysaccharide metabolic process	biological_process	13	0.44412
GO:0009704	de-etiolation	biological_process	1	0.44424
GO:0072350	tricarboxylic acid metabolic process	biological_process	1	0.44489
GO:0009269	response to desiccation	biological_process	1	0.44528
GO:0006184	obsolete GTP catabolic process	biological_process	3	0.44535
GO:1901069	guanosine-containing compound catabolic process	biological_process	3	0.44535
GO:2000280	regulation of root development	biological_process	2	0.44553
GO:0048511	rhythmic process	biological_process	2	0.44569
GO:0046499	S-adenosylmethioninamine metabolic process	biological_process	1	0.44724
GO:0006557	S-adenosylmethioninamine biosynthetic process	biological_process	1	0.44724
GO:0010608	posttranscriptional regulation of gene expression	biological_process	11	0.4473
GO:0007166	cell surface receptor signaling pathway	biological_process	6	0.44759
GO:1901616	organic hydroxy compound catabolic process	biological_process	2	0.44767
GO:0009059	macromolecule biosynthetic process	biological_process	322	0.45009
GO:0009790	embryo development	biological_process	18	0.45162
GO:0009247	glycolipid biosynthetic process	biological_process	2	0.45172
GO:1901661	quinone metabolic process	biological_process	7	0.45211
GO:1901663	quinone biosynthetic process	biological_process	7	0.45211
GO:0042181	ketone biosynthetic process	biological_process	7	0.45211
GO:0030833	regulation of actin filament polymerization	biological_process	2	0.45241
GO:0032271	regulation of protein polymerization	biological_process	2	0.45241
GO:0030041	actin filament polymerization	biological_process	2	0.45241
GO:0006888	ER to Golgi vesicle-mediated transport	biological_process	2	0.45262
GO:0006743	ubiquinone metabolic process	biological_process	1	0.45303
GO:0006744	ubiquinone biosynthetic process	biological_process	1	0.45303
GO:0015824	proline transport	biological_process	1	0.45338
GO:0035524	proline transmembrane transport	biological_process	1	0.45338
GO:0046051	UTP metabolic process	biological_process	2	0.45471
GO:0006183	GTP biosynthetic process	biological_process	2	0.45471
GO:0006228	UTP biosynthetic process	biological_process	2	0.45471
GO:0072522	purine-containing compound biosynthetic process	biological_process	19	0.45488
GO:0072598	protein localization to chloroplast	biological_process	3	0.45503
GO:0009793	embryo development ending in seed dormancy	biological_process	14	0.45545
GO:0042440	pigment metabolic process	biological_process	29	0.45567
GO:1900055	regulation of leaf senescence	biological_process	1	0.45799
GO:0036092	phosphatidylinositol-3-phosphate biosynthetic process	biological_process	1	0.45871
GO:0009959	negative gravitropism	biological_process	1	0.45904
GO:0006635	fatty acid beta-oxidation	biological_process	3	0.45933
GO:0070592	cell wall polysaccharide biosynthetic process	biological_process	3	0.45938
GO:0070589	cellular component macromolecule biosynthetic process	biological_process	3	0.45938
GO:0044038	cell wall macromolecule biosynthetic process	biological_process	3	0.45938
GO:0090333	regulation of stomatal closure	biological_process	1	0.45975
GO:0048278	vesicle docking	biological_process	2	0.46062
GO:0048508	embryonic meristem development	biological_process	1	0.4626
GO:0007623	circadian rhythm	biological_process	2	0.46477
GO:0008333	endosome to lysosome transport	biological_process	1	0.46497
GO:0048527	lateral root development	biological_process	3	0.46531
GO:0030162	regulation of proteolysis	biological_process	3	0.4656
GO:0051640	organelle localization	biological_process	7	0.46612
GO:0009683	indoleacetic acid metabolic process	biological_process	1	0.467
GO:0009684	indoleacetic acid biosynthetic process	biological_process	1	0.467
GO:0010224	response to UV-B	biological_process	3	0.46791
GO:0035239	tube morphogenesis	biological_process	3	0.46836
GO:0009225	nucleotide-sugar metabolic process	biological_process	1	0.46836
GO:0051346	negative regulation of hydrolase activity	biological_process	5	0.46844
GO:0090351	seedling development	biological_process	9	0.46904
GO:0009887	animal organ morphogenesis	biological_process	4	0.46987
GO:0006595	polyamine metabolic process	biological_process	3	0.47007
GO:0006596	polyamine biosynthetic process	biological_process	3	0.47007
GO:0048017	inositol lipid-mediated signaling	biological_process	1	0.47059
GO:0043632	modification-dependent macromolecule catabolic process	biological_process	14	0.47073
GO:0060968	regulation of gene silencing	biological_process	1	0.47214
GO:0043900	regulation of multi-organism process	biological_process	7	0.47244
GO:0048764	trichoblast maturation	biological_process	3	0.47311
GO:0048765	root hair cell differentiation	biological_process	3	0.47311
GO:0048466	androecium development	biological_process	4	0.4739
GO:0048443	stamen development	biological_process	4	0.4739
GO:0071985	multivesicular body sorting pathway	biological_process	1	0.47429
GO:0009082	branched-chain amino acid biosynthetic process	biological_process	2	0.47483
GO:0006797	polyphosphate metabolic process	biological_process	1	0.47493
GO:0006799	polyphosphate biosynthetic process	biological_process	1	0.47493
GO:0048016	inositol phosphate-mediated signaling	biological_process	1	0.47493
GO:0009719	response to endogenous stimulus	biological_process	103	0.47668
GO:0034765	regulation of ion transmembrane transport	biological_process	1	0.47726
GO:1990267	response to transition metal nanoparticle	biological_process	1	0.47758
GO:0016144	S-glycoside biosynthetic process	biological_process	1	0.47864
GO:0019761	glucosinolate biosynthetic process	biological_process	1	0.47864
GO:0019758	glycosinolate biosynthetic process	biological_process	1	0.47864
GO:0071417	cellular response to organonitrogen compound	biological_process	3	0.47924
GO:0048870	cell motility	biological_process	2	0.48073
GO:0051674	localization of cell	biological_process	2	0.48073
GO:0009610	response to symbiotic fungus	biological_process	1	0.48439
GO:0042214	terpene metabolic process	biological_process	1	0.48461
GO:0030522	intracellular receptor signaling pathway	biological_process	3	0.48556
GO:0009555	pollen development	biological_process	6	0.48648
GO:0010256	endomembrane system organization	biological_process	3	0.4869
GO:0048455	stamen formation	biological_process	1	0.48756
GO:0048448	stamen morphogenesis	biological_process	1	0.48756
GO:0010043	response to zinc ion	biological_process	1	0.48814
GO:0051247	positive regulation of protein metabolic process	biological_process	7	0.48825
GO:0019856	pyrimidine nucleobase biosynthetic process	biological_process	1	0.48969
GO:0000423	mitophagy	biological_process	1	0.49016
GO:0042335	cuticle development	biological_process	2	0.49038
GO:0080135	regulation of cellular response to stress	biological_process	3	0.49045
GO:0016036	cellular response to phosphate starvation	biological_process	2	0.49082
GO:0045010	actin nucleation	biological_process	2	0.4931
GO:1901891	regulation of cell septum assembly	biological_process	1	0.49315
GO:0090529	cell septum assembly	biological_process	1	0.49315
GO:0032954	regulation of cytokinetic process	biological_process	1	0.49315
GO:0032955	regulation of barrier septum assembly	biological_process	1	0.49315
GO:0000917	barrier septum assembly	biological_process	1	0.49315
GO:0006527	arginine catabolic process	biological_process	1	0.4938
GO:0043543	protein acylation	biological_process	1	0.49405
GO:0031401	positive regulation of protein modification process	biological_process	5	0.49508
GO:0051274	beta-glucan biosynthetic process	biological_process	9	0.49665
GO:0001678	cellular glucose homeostasis	biological_process	2	0.49854
GO:0009749	response to glucose	biological_process	2	0.49854
GO:0006388	tRNA splicing, via endonucleolytic cleavage and ligation	biological_process	2	0.49954
GO:0009298	GDP-mannose biosynthetic process	biological_process	1	0.5026
GO:0045596	negative regulation of cell differentiation	biological_process	2	0.5033
GO:0009886	post-embryonic animal morphogenesis	biological_process	4	0.50439
GO:0019693	ribose phosphate metabolic process	biological_process	26	0.50463
GO:0051093	negative regulation of developmental process	biological_process	4	0.50521
GO:0070727	cellular macromolecule localization	biological_process	35	0.5058
GO:0033683	nucleotide-excision repair, DNA incision	biological_process	1	0.50618
GO:0006296	nucleotide-excision repair, DNA incision, 5'-to lesion	biological_process	1	0.50618
GO:0032784	regulation of DNA-templated transcription, elongation	biological_process	1	0.50664
GO:0046339	diacylglycerol metabolic process	biological_process	1	0.50683
GO:0006651	diacylglycerol biosynthetic process	biological_process	1	0.50683
GO:0042816	vitamin B6 metabolic process	biological_process	1	0.50745
GO:0042819	vitamin B6 biosynthetic process	biological_process	1	0.50745
GO:0042168	heme metabolic process	biological_process	3	0.50919
GO:0045488	pectin metabolic process	biological_process	4	0.50962
GO:0009756	carbohydrate mediated signaling	biological_process	1	0.50973
GO:0010182	sugar mediated signaling pathway	biological_process	1	0.50973
GO:0046467	membrane lipid biosynthetic process	biological_process	2	0.51217
GO:0031167	rRNA methylation	biological_process	1	0.51443
GO:0010065	primary meristem tissue development	biological_process	1	0.51495
GO:0010067	procambium histogenesis	biological_process	1	0.51495
GO:0010088	phloem development	biological_process	1	0.51495
GO:0006399	tRNA metabolic process	biological_process	19	0.51529
GO:0050790	regulation of catalytic activity	biological_process	18	0.51835
GO:0010496	intercellular transport	biological_process	1	0.51846
GO:0009081	branched-chain amino acid metabolic process	biological_process	3	0.51897
GO:0032270	positive regulation of cellular protein metabolic process	biological_process	7	0.52021
GO:0034243	regulation of transcription elongation from RNA polymerase II promoter	biological_process	1	0.52091
GO:0051234	establishment of localization	biological_process	192	0.52151
GO:1902117	positive regulation of organelle assembly	biological_process	1	0.52185
GO:0048519	negative regulation of biological process	biological_process	51	0.52494
GO:0009743	response to carbohydrate	biological_process	4	0.52616
GO:0000160	phosphorelay signal transduction system	biological_process	8	0.52641
GO:0060284	regulation of cell development	biological_process	1	0.52645
GO:0016126	sterol biosynthetic process	biological_process	1	0.52676
GO:0071236	cellular response to antibiotic	biological_process	1	0.52772
GO:0002366	leukocyte activation involved in immune response	biological_process	1	0.52785
GO:0002443	leukocyte mediated immunity	biological_process	1	0.52785
GO:0002263	cell activation involved in immune response	biological_process	1	0.52785
GO:0019220	regulation of phosphate metabolic process	biological_process	13	0.52805
GO:0051174	regulation of phosphorus metabolic process	biological_process	13	0.52805
GO:0006825	copper ion transport	biological_process	1	0.52934
GO:0016477	cell migration	biological_process	2	0.52984
GO:0010101	post-embryonic root morphogenesis	biological_process	1	0.53134
GO:0010102	lateral root morphogenesis	biological_process	1	0.53134
GO:0009952	anterior/posterior pattern specification	biological_process	1	0.53215
GO:0035282	segmentation	biological_process	1	0.53215
GO:2000736	regulation of stem cell differentiation	biological_process	1	0.53215
GO:0042594	response to starvation	biological_process	15	0.5335
GO:0060255	regulation of macromolecule metabolic process	biological_process	215	0.53533
GO:0016444	somatic cell DNA recombination	biological_process	1	0.53912
GO:0002440	production of molecular mediator of immune response	biological_process	1	0.53912
GO:0046649	lymphocyte activation	biological_process	1	0.53912
GO:0009065	glutamine family amino acid catabolic process	biological_process	2	0.53979
[truncated: 1,937 more rows]
