# Supplementary material
Source: MDPI journal article supplement (https://www.mdpi.com/2073-4395/13/3/623)
Supplement: s1 [file s1 › Table S6.xlsx]

## Sheet: Sheet1
#Kegg_pathway	ko_id	Input number	Background number	P-value	Corrected_P-value
Autophagy - other	ko04136	14	62	1.71005e-06	0.000200076
Ether lipid metabolism	ko00565	11	51	3.51534e-05	0.00411295
Phenylpropanoid biosynthesis	ko00940	40	432	0.000129425	0.0151427
Starch and sucrose metabolism	ko00500	36	399	0.000457562	0.0535348
Glycerophospholipid metabolism	ko00564	23	223	0.000823571	0.0963578
beta-Alanine metabolism	ko00410	11	75	0.0012145	0.142096
Nitrogen metabolism	ko00910	9	57	0.00197071	0.230573
Taurine and hypotaurine metabolism	ko00430	4	14	0.00419734	0.491088
Galactose metabolism	ko00052	17	167	0.00431403	0.504741
Plant hormone signal transduction	ko04075	59	851	0.0066341	0.77619
Zeatin biosynthesis	ko00908	9	70	0.00801252	0.937465
Fatty acid degradation	ko00071	11	96	0.00849822	0.994292
ABC transporters	ko02010	20	226	0.00983087	1
Flavone and flavonol biosynthesis	ko00944	5	27	0.0100759	1
alpha-Linolenic acid metabolism	ko00592	12	112	0.0103259	1
Inositol phosphate metabolism	ko00562	15	154	0.0104952	1
Arginine biosynthesis	ko00220	8	63	0.0130145	1
MAPK signaling pathway - plant	ko04016	43	608	0.0140175	1
Cutin, suberine and wax biosynthesis	ko00073	10	97	0.0233862	1
Alanine, aspartate and glutamate metabolism	ko00250	14	161	0.0317249	1
Flavonoid biosynthesis	ko00941	12	134	0.0368205	1
Valine, leucine and isoleucine degradation	ko00280	10	105	0.0377494	1
Propanoate metabolism	ko00640	6	50	0.0379998	1
Glycerolipid metabolism	ko00561	15	181	0.0387511	1
Peroxisome	ko04146	14	169	0.0449221	1
Monoterpenoid biosynthesis	ko00902	3	19	0.0669776	1
Biosynthesis of amino acids	ko01230	27	399	0.0698557	1
Brassinosteroid biosynthesis	ko00905	4	32	0.0743172	1
Glyoxylate and dicarboxylate metabolism	ko00630	10	124	0.0934673	1
Biosynthesis of unsaturated fatty acids	ko01040	5	50	0.104376	1
Carotenoid biosynthesis	ko00906	7	81	0.111378	1
Phosphatidylinositol signaling system	ko04070	12	162	0.114331	1
Cyanoamino acid metabolism	ko00460	9	114	0.118726	1
Pantothenate and CoA biosynthesis	ko00770	6	67	0.118823	1
Fructose and mannose metabolism	ko00051	10	131	0.122252	1
Tyrosine metabolism	ko00350	7	87	0.146166	1
Limonene and pinene degradation	ko00903	2	14	0.153808	1
Other glycan degradation	ko00511	10	138	0.155363	1
Pentose phosphate pathway	ko00030	8	105	0.156807	1
Fatty acid metabolism	ko01212	9	124	0.170347	1
Stilbenoid, diarylheptanoid and gingerol biosynthesis	ko00945	7	92	0.178611	1
Nicotinate and nicotinamide metabolism	ko00760	4	45	0.187963	1
Phenylalanine metabolism	ko00360	7	95	0.199418	1
Pentose and glucuronate interconversions	ko00040	12	184	0.214007	1
Amino sugar and nucleotide sugar metabolism	ko00520	22	367	0.222273	1
Histidine metabolism	ko00340	3	35	0.255848	1
Pyrimidine metabolism	ko00240	8	121	0.261863	1
Indole alkaloid biosynthesis	ko00901	2	20	0.265521	1
Porphyrin and chlorophyll metabolism	ko00860	6	88	0.279761	1
Arginine and proline metabolism	ko00330	7	106	0.282535	1
Betalain biosynthesis	ko00965	3	37	0.283462	1
Mannose type O-glycan biosynthesis	ko00515	3	37	0.283462	1
Endocytosis	ko04144	20	349	0.301207	1
Butanoate metabolism	ko00650	4	56	0.309046	1
Ubiquinone and other terpenoid-quinone biosynthesis	ko00130	5	77	0.34376	1
Carbon metabolism	ko01200	26	478	0.363193	1
Fatty acid biosynthesis	ko00061	5	79	0.363924	1
Phagosome	ko04145	8	135	0.366588	1
2-Oxocarboxylic acid metabolism	ko01210	6	98	0.369113	1
Glycolysis / Gluconeogenesis	ko00010	15	269	0.374523	1
Lysine degradation	ko00310	4	63	0.389859	1
Sulfur metabolism	ko00920	4	63	0.389859	1
Phenylalanine, tyrosine and tryptophan biosynthesis	ko00400	5	84	0.414319	1
Plant-pathogen interaction	ko04626	53	1022	0.420735	1
Benzoxazinoid biosynthesis	ko00402	3	47	0.422007	1
Tropane, piperidine and pyridine alkaloid biosynthesis	ko00960	3	47	0.422007	1
Ascorbate and aldarate metabolism	ko00053	6	104	0.423496	1
Synthesis and degradation of ketone bodies	ko00072	1	11	0.432543	1
Folate biosynthesis	ko00790	3	48	0.435505	1
Isoflavonoid biosynthesis	ko00943	2	30	0.448547	1
Sphingolipid metabolism	ko00600	6	107	0.450489	1
Glycosaminoglycan degradation	ko00531	4	69	0.458119	1
Phosphonate and phosphinate metabolism	ko00440	1	13	0.488121	1
Monobactam biosynthesis	ko00261	1	14	0.513837	1
Selenocompound metabolism	ko00450	2	35	0.530303	1
Glucosinolate biosynthesis	ko00966	1	16	0.561465	1
Lysine biosynthesis	ko00300	1	17	0.583502	1
Isoquinoline alkaloid biosynthesis	ko00950	3	60	0.585649	1
Riboflavin metabolism	ko00740	2	43	0.64299	1
Vitamin B6 metabolism	ko00750	1	22	0.678171	1
Arachidonic acid metabolism	ko00590	2	47	0.690818	1
Glycosphingolipid biosynthesis - ganglio series	ko00604	2	50	0.723126	1
Tryptophan metabolism	ko00380	6	145	0.741768	1
Steroid biosynthesis	ko00100	2	54	0.761726	1
Linoleic acid metabolism	ko00591	1	28	0.763858	1
Other types of O-glycan biosynthesis	ko00514	1	29	0.775737	1
Valine, leucine and isoleucine biosynthesis	ko00290	1	29	0.775737	1
Cysteine and methionine metabolism	ko00270	7	179	0.800763	1
Fatty acid elongation	ko00062	2	62	0.825103	1
Biotin metabolism	ko00780	1	34	0.82676	1
Terpenoid backbone biosynthesis	ko00900	3	94	0.857377	1
Thiamine metabolism	ko00730	1	39	0.86619	1
Citrate cycle (TCA cycle)	ko00020	3	98	0.875891	1
Circadian rhythm - plant	ko04712	6	175	0.87873	1
Purine metabolism	ko00230	9	250	0.886482	1
Homologous recombination	ko03440	3	102	0.892243	1
Proteasome	ko03050	3	106	0.906639	1
Base excision repair	ko03410	2	81	0.919173	1
Glycine, serine and threonine metabolism	ko00260	3	110	0.919272	1
Pyruvate metabolism	ko00620	5	165	0.922166	1
RNA degradation	ko03018	6	208	0.953314	1
Mismatch repair	ko03430	1	71	0.974444	1
Basal transcription factors	ko03022	1	72	0.975735	1
Carbon fixation in photosynthetic organisms	ko00710	3	144	0.978065	1
Ubiquitin mediated proteolysis	ko04120	7	263	0.980414	1
Aminoacyl-tRNA biosynthesis	ko00970	3	149	0.982043	1
DNA replication	ko03030	1	85	0.987633	1
Protein export	ko03060	1	86	0.988258	1
Ribosome biogenesis in eukaryotes	ko03008	3	161	0.988972	1
mRNA surveillance pathway	ko03015	4	202	0.992233	1
Glutathione metabolism	ko00480	3	174	0.993565	1
Spliceosome	ko03040	9	375	0.99675	1
Protein processing in endoplasmic reticulum	ko04141	10	415	0.997774	1
Sesquiterpenoid and triterpenoid biosynthesis	ko00909	1	150	0.99958	1
Oxidative phosphorylation	ko00190	2	211	0.999786	1
Diterpenoid biosynthesis	ko00904	1	163	0.999787	1
RNA transport	ko03013	3	388	1	1
