# Supplementary material
Source: MDPI journal article supplement (https://www.mdpi.com/2073-4395/13/3/623)
Supplement: s1 [file s1 › Table S7.xlsx]

## Sheet: Sheet1
#Kegg_pathway	ko_id	Input number	Background number	P-value	Corrected_P-value
Photosynthesis - antenna proteins	ko00196	22	29	6.73881e-21	8.08657e-19
Carbon fixation in photosynthetic organisms	ko00710	46	144	1.06026e-13	1.27232e-11
Photosynthesis	ko00195	49	214	7.45182e-13	8.94218e-11
Ribosome	ko03010	61	458	6.84581e-08	8.21498e-06
Porphyrin and chlorophyll metabolism	ko00860	21	88	1.57421e-07	1.88906e-05
Carbon metabolism	ko01200	61	478	3.17175e-07	3.8061e-05
Carotenoid biosynthesis	ko00906	16	81	5.87569e-05	0.00705083
Pentose phosphate pathway	ko00030	18	105	0.000144388	0.0173266
Glycolysis / Gluconeogenesis	ko00010	34	269	0.000162803	0.0195363
Ubiquinone and other terpenoid-quinone biosynthesis	ko00130	13	77	0.00135789	0.162947
Fructose and mannose metabolism	ko00051	18	131	0.00216222	0.259467
Terpenoid backbone biosynthesis	ko00900	13	94	0.00802378	0.962854
Fatty acid elongation	ko00062	9	62	0.0188183	1
Thiamine metabolism	ko00730	6	39	0.0396117	1
Starch and sucrose metabolism	ko00500	35	399	0.0465215	1
Vitamin B6 metabolism	ko00750	4	22	0.0519086	1
Flavonoid biosynthesis	ko00941	14	134	0.055458	1
Tryptophan metabolism	ko00380	14	145	0.0927074	1
Glutathione metabolism	ko00480	16	174	0.105779	1
Linoleic acid metabolism	ko00591	4	28	0.107181	1
Phosphatidylinositol signaling system	ko04070	15	162	0.10976	1
Biosynthesis of amino acids	ko01230	32	399	0.134848	1
Ascorbate and aldarate metabolism	ko00053	10	104	0.142421	1
Circadian rhythm - plant	ko04712	15	175	0.172388	1
Glyoxylate and dicarboxylate metabolism	ko00630	11	124	0.188218	1
Arachidonic acid metabolism	ko00590	5	47	0.191899	1
Pyruvate metabolism	ko00620	14	165	0.192437	1
Folate biosynthesis	ko00790	5	48	0.203574	1
Glycerolipid metabolism	ko00561	15	181	0.206361	1
Tyrosine metabolism	ko00350	8	87	0.208689	1
Betalain biosynthesis	ko00965	4	37	0.221414	1
Arginine biosynthesis	ko00220	6	63	0.229223	1
Taurine and hypotaurine metabolism	ko00430	2	14	0.232311	1
Limonene and pinene degradation	ko00903	2	14	0.232311	1
Biosynthesis of various secondary metabolites - part 2	ko00998	1	4	0.23727	1
Anthocyanin biosynthesis	ko00942	1	4	0.23727	1
Steroid biosynthesis	ko00100	5	54	0.277815	1
Butanoate metabolism	ko00650	5	56	0.303721	1
Isoquinoline alkaloid biosynthesis	ko00950	5	60	0.356419	1
beta-Alanine metabolism	ko00410	6	75	0.367494	1
Valine, leucine and isoleucine degradation	ko00280	8	105	0.381616	1
Aminoacyl-tRNA biosynthesis	ko00970	11	149	0.384839	1
Stilbenoid, diarylheptanoid and gingerol biosynthesis	ko00945	7	92	0.397357	1
Selenocompound metabolism	ko00450	3	35	0.40429	1
Histidine metabolism	ko00340	3	35	0.40429	1
Inositol phosphate metabolism	ko00562	11	154	0.427441	1
Phenylalanine metabolism	ko00360	7	95	0.430073	1
2-Oxocarboxylic acid metabolism	ko01210	7	98	0.462557	1
Zeatin biosynthesis	ko00908	5	70	0.487466	1
Glycerophospholipid metabolism	ko00564	15	223	0.495382	1
RNA degradation	ko03018	14	208	0.497207	1
Oxidative phosphorylation	ko00190	14	211	0.519296	1
Synthesis and degradation of ketone bodies	ko00072	1	11	0.525302	1
C5-Branched dibasic acid metabolism	ko00660	1	11	0.525302	1
Flavone and flavonol biosynthesis	ko00944	2	27	0.535526	1
Riboflavin metabolism	ko00740	3	43	0.540993	1
Arginine and proline metabolism	ko00330	7	106	0.546592	1
Glycosphingolipid biosynthesis - globo and isoglobo series	ko00603	1	12	0.556407	1
Valine, leucine and isoleucine biosynthesis	ko00290	2	29	0.574765	1
Isoflavonoid biosynthesis	ko00943	2	30	0.593457	1
Tropane, piperidine and pyridine alkaloid biosynthesis	ko00960	3	47	0.602219	1
Monobactam biosynthesis	ko00261	1	14	0.612642	1
Ribosome biogenesis in eukaryotes	ko03008	10	161	0.614896	1
MAPK signaling pathway - plant	ko04016	38	608	0.6439	1
Pantothenate and CoA biosynthesis	ko00770	4	67	0.647034	1
Peroxisome	ko04146	10	169	0.675467	1
Lysine biosynthesis	ko00300	1	17	0.68393	1
Mannose type O-glycan biosynthesis	ko00515	2	37	0.707131	1
Plant hormone signal transduction	ko04075	52	851	0.723996	1
Monoterpenoid biosynthesis	ko00902	1	19	0.724016	1
Nitrogen metabolism	ko00910	3	57	0.730291	1
Glycine, serine and threonine metabolism	ko00260	6	110	0.734438	1
Indole alkaloid biosynthesis	ko00901	1	20	0.742113	1
Cyanoamino acid metabolism	ko00460	6	114	0.765021	1
Cutin, suberine and wax biosynthesis	ko00073	5	97	0.769601	1
Base excision repair	ko03410	4	81	0.785479	1
Sulfur metabolism	ko00920	3	63	0.790137	1
SNARE interactions in vesicular transport	ko04130	3	65	0.807467	1
Phenylalanine, tyrosine and tryptophan biosynthesis	ko00400	4	84	0.808711	1
Pyrimidine metabolism	ko00240	6	121	0.812124	1
Protein export	ko03060	4	86	0.823029	1
Alanine, aspartate and glutamate metabolism	ko00250	8	161	0.835389	1
Other types of O-glycan biosynthesis	ko00514	1	29	0.859968	1
alpha-Linolenic acid metabolism	ko00592	5	112	0.865205	1
Fatty acid degradation	ko00071	4	96	0.881892	1
Brassinosteroid biosynthesis	ko00905	1	32	0.88577	1
Ubiquitin mediated proteolysis	ko04120	13	263	0.886533	1
Citrate cycle (TCA cycle)	ko00020	4	98	0.891378	1
Biotin metabolism	ko00780	1	34	0.900276	1
Purine metabolism	ko00230	12	250	0.900523	1
Cysteine and methionine metabolism	ko00270	8	179	0.906852	1
Nucleotide excision repair	ko03420	4	106	0.922955	1
Lysine degradation	ko00310	2	63	0.924509	1
Glycosylphosphatidylinositol (GPI)-anchor biosynthesis	ko00563	1	39	0.928992	1
Nicotinate and nicotinamide metabolism	ko00760	1	45	0.952769	1
Propanoate metabolism	ko00640	1	50	0.966381	1
Biosynthesis of unsaturated fatty acids	ko01040	1	50	0.966381	1
Ether lipid metabolism	ko00565	1	51	0.968591	1
Sphingolipid metabolism	ko00600	3	107	0.974536	1
N-Glycan biosynthesis	ko00510	2	84	0.977008	1
Pentose and glucuronate interconversions	ko00040	6	184	0.983651	1
Autophagy - other	ko04136	1	62	0.985141	1
Galactose metabolism	ko00052	5	167	0.987014	1
Plant-pathogen interaction	ko04626	51	1022	0.987458	1
Sesquiterpenoid and triterpenoid biosynthesis	ko00909	4	150	0.990396	1
Amino sugar and nucleotide sugar metabolism	ko00520	14	367	0.992031	1
Basal transcription factors	ko03022	1	72	0.992481	1
ABC transporters	ko02010	7	226	0.993228	1
Fatty acid biosynthesis	ko00061	1	79	0.995334	1
Spliceosome	ko03040	13	375	0.997181	1
Fatty acid metabolism	ko01212	2	124	0.99789	1
Phenylpropanoid biosynthesis	ko00940	15	432	0.998453	1
Endocytosis	ko04144	11	349	0.998529	1
Phagosome	ko04145	2	135	0.998927	1
Homologous recombination	ko03440	1	102	0.999029	1
Other glycan degradation	ko00511	2	138	0.999108	1
Protein processing in endoplasmic reticulum	ko04141	13	415	0.999429	1
Diterpenoid biosynthesis	ko00904	2	163	0.999813	1
mRNA surveillance pathway	ko03015	3	202	0.99988	1
RNA transport	ko03013	9	388	0.99997	1
