# Supplementary material
Source: MDPI journal article supplement (https://www.mdpi.com/2073-4395/13/3/623)
Supplement: s1 [file s1 › Table S8.xlsx]

## Sheet: MvsS_DEGs
#ID	Mature1_Count	Mature2_Count	Mature3_Count	Senesc1_Count	Senesc2_Count	Senesc3_Count	Mature1_FPKM	Mature2_FPKM	Mature3_FPKM	Senesc1_FPKM	Senesc2_FPKM	Senesc3_FPKM	FDR	log2FC	regulated
PB.10049	487	593	418	138	245	111	15.7955	20.4274	12.7766	4.26476	6.8763	3.38987	3.92364e-05	-1.5923	down
PB.10233	233	179	164	300	647	490	6.92271	5.64621	4.61701	8.50605	16.8556	14.0398	0.00334355	1.3447	up
PB.10274	42	29	18	165	135	168	0.721444	0.520272	0.281032	2.701	2.01788	2.76928	8.35123e-10	2.43171	up
PB.10594	111	88	71	16	37	20	1.12914	0.938545	0.68092	0.152559	0.323438	0.192548	0.000181464	-1.87463	down
PB.10828	133	112	136	48	40	53	1.84171	1.64858	1.78787	0.635958	0.480362	0.710207	0.000681512	-1.37717	down
PB.10873	830	995	720	187	254	124	13.8091	17.5248	11.3295	2.96553	3.69176	1.97923	2.83353e-09	-2.15676	down
PB.10906	126	157	192	566	500	409	1.81207	2.38283	2.60989	7.75354	6.28392	5.66195	5.77865e-11	1.68286	up
PB.11069	16571	17132	19103	5452	7725	5744	285.476	312.496	311.134	89.5085	116.454	95.284	4.79135e-15	-1.44417	down
PB.11191	49	27	137	352	420	171	0.640318	0.375491	1.71654	4.4539	4.87625	2.1848	0.000905143	2.21805	up
PB.11333	436	409	270	54	71	30	5.26347	5.22809	3.08379	0.616659	0.748933	0.340498	1.35228e-08	-2.83678	down
PB.11366	902	479	690	130	150	79	40.6379	22.835	29.3669	5.57678	5.90169	3.38497	4.97426e-07	-2.49256	down
PB.11450	90	115	149	404	246	309	0.450004	0.611749	0.703964	1.93458	1.08095	1.49219	0.000361832	1.50028	up
PB.11528	128	52	76	293	267	259	1.475	0.668226	0.805275	3.66982	2.93387	2.8327	1.85792e-08	1.7273	up
PB.11570	272	205	263	71	86	73	2.50453	1.99464	2.29056	0.618817	0.689211	0.644158	2.77876e-07	-1.64159	down
PB.11620	88	67	65	125	154	174	1.02837	0.818054	0.702675	1.39978	1.58337	1.96666	0.00346466	1.08503	up
PB.11849	360	451	587	1036	1115	1103	4.27485	5.67996	6.5985	11.7398	11.6063	12.6319	4.87899e-09	1.27139	up
PB.12067	171	184	263	476	746	467	2.4221	2.76586	3.53365	6.44658	9.27239	6.39237	1.62022e-06	1.4904	up
PB.12134	713	843	804	1800	1515	1619	6.45659	13.1928	6.36845	26.2321	19.6929	21.8406	6.35434e-08	1.10958	up
PB.12495	292	340	149	83	70	13	3.74628	4.61598	1.80304	1.00674	0.776958	0.150508	0.00357783	-2.23487	down
PB.1266	1044	923	896	369	482	281	28.5781	26.7493	23.1844	9.61572	11.5462	7.40157	4.98341e-09	-1.31164	down
PB.12784	1509	1274	1372	695	778	549	14.7846	13.2186	12.7075	6.49163	6.66574	5.18041	2.18487e-06	-1.00292	down
PB.12906	21	13	8	65	62	78	0.281588	0.182982	0.099862	0.870311	0.758233	1.04241	4.80061e-05	2.32338	up
PB.13101	224	215	270	67	75	76	1.7393	1.78063	2.01339	0.483321	0.500431	0.580468	3.32052e-07	-1.65137	down
PB.13122	17	10	19	89	107	106	0.56543	0.345326	0.589087	2.88508	3.16645	3.45808	2.63749e-08	2.77357	up
PB.13123	31	12	17	304	265	323	0.167042	0.06707	0.087297	1.60338	1.28341	1.7231	9.60468e-29	3.94793	up
PB.13152	563	378	654	2245	2516	2429	15.5198	11.0227	17.0688	59.0544	60.7859	64.565	6.97894e-28	2.22937	up
PB.13176	85	99	115	218	211	235	0.602466	0.740113	0.772731	1.47368	1.30784	1.60966	0.000199336	1.20296	up
PB.13210	382	394	224	105	108	62	15.1546	16.5724	8.40499	3.95273	3.74279	2.34619	0.000418668	-1.84684	down
PB.1328	1867	2586	2061	208	344	436	26.5389	37.8518	27.7373	2.64325	4.14024	5.96554	1.11528e-12	-2.6812	down
PB.13338	708	922	798	172	134	118	11.3865	15.7228	12.1358	2.629	1.82574	1.7807	9.50326e-18	-2.47816	down
PB.13554	793	517	681	2539	1989	1693	10.9872	7.58115	8.92717	33.5459	24.1301	22.6017	1.26068e-07	1.69271	up
PB.13644	648	451	506	1129	1268	1178	10.0507	7.40065	7.41348	16.6871	17.2117	17.5995	1.77278e-08	1.19807	up
PB.13657	425	392	280	31	62	17	44.8851	43.7874	27.9217	3.0254	5.65753	1.69839	2.04311e-12	-3.32113	down
PB.13678	27485	34140	25508	6636	9141	8332	427.71	562.507	375.298	98.4055	124.491	124.859	1.16062e-08	-1.82388	down
PB.13691	3669	3231	3494	6730	7885	6401	90.4922	84.37	81.47	158.195	170.178	152.022	1.69256e-08	1.0548	up
PB.13929	158	234	135	508	347	339	5.14049	8.06762	4.15619	15.7513	9.88944	10.629	0.00276065	1.21052	up
PB.13942	356	491	263	70	68	55	5.40937	7.90602	3.77741	1.01186	0.900011	0.792751	5.96786e-05	-2.50283	down
PB.14245	40	36	37	154	133	134	0.23898	0.227206	0.207301	0.891013	0.703952	0.780909	1.25327e-06	1.94306	up
PB.14268	73	62	93	176	121	213	0.410298	0.370282	0.496659	0.945876	0.597142	1.15937	0.00804437	1.23291	up
PB.1432	71	79	115	192	211	257	0.658177	0.779756	1.01551	1.70953	1.72378	2.31317	2.63085e-05	1.37731	up
PB.14523	27	37	21	83	61	98	0.329051	0.47909	0.238642	0.975624	0.652906	1.16437	0.00186713	1.54962	up
PB.14549	410	436	309	100	170	80	12.1329	13.6917	8.64821	2.82057	4.40098	2.27379	4.37493e-06	-1.71269	down
PB.14666	44	23	19	86	61	92	0.408562	0.223989	0.163706	0.75697	0.495445	0.820451	0.00247854	1.52313	up
PB.14808	1687	1867	1809	550	162	651	24.2513	15.0752	14.7574	7.55575	1.98482	8.98355	6.37465e-13	-1.90089	down
PB.14827	100	66	99	201	154	258	0.730748	0.504716	0.682656	1.39833	0.983851	1.81759	0.00417368	1.27783	up
PB.14892	162	146	195	383	297	366	1.55351	1.4831	1.76956	3.50099	2.49325	3.38459	6.71901e-05	1.11558	up
PB.15065	44	36	74	17	5	0	0.711167	0.621198	1.13707	0.263383	0.060548	0	8.87035e-05	-2.74159	down
PB.15186	33	0	28	120	120	127	0.617273	0	0.500571	2.18966	2.01191	2.35453	4.60323e-09	2.67217	up
PB.15263	37	128	65	181	267	221	0.48601	1.80069	0.80966	2.2987	3.1127	2.83648	3.75066e-05	1.55387	up
PB.15265	588	584	942	275	261	301	7.16046	7.34265	10.7807	3.15409	2.75116	3.51475	3.39881e-05	-1.27324	down
PB.15352	1801	1632	1380	741	547	462	18.4012	17.4707	13.3114	7.12998	4.94147	4.50952	1.30001e-07	-1.42167	down
PB.15429	173	101	252	385	405	364	2.41479	1.48964	3.33522	5.13559	4.96405	4.90737	1.21108e-05	1.2001	up
PB.15695	201	212	216	434	447	358	2.28837	2.54989	2.32672	4.70617	4.45921	3.9292	0.000103109	1.01707	up
PB.15823	60	54	52	20	19	14	0.891681	0.850721	0.730959	0.281784	0.239613	0.193042	0.00940282	-1.61115	down
PB.15896	55	74	67	154	98	153	0.699747	0.989583	0.807758	1.87439	1.09731	1.87954	0.00602026	1.10146	up
PB.15935	61	37	19	78	126	120	0.661267	0.43278	0.18859	0.810901	1.20579	1.25577	0.00052019	1.49107	up
PB.16298	1685	1929	1162	223	284	133	150.964	183.019	98.4038	19.0448	22.2165	11.3947	4.56352e-08	-2.88991	down
PB.16305	216	268	174	49	43	37	7.77668	10.192	5.89863	1.67628	1.34189	1.27765	2.09621e-07	-2.32178	down
PB.16313	390	570	373	88	144	103	5.30353	8.23672	4.80936	1.12508	1.70596	1.36253	3.72806e-05	-1.97464	down
PB.1776	155	160	135	359	343	252	2.79486	3.05397	2.2942	6.16748	5.40719	4.36942	7.16124e-05	1.11628	up
PB.1849	135	125	186	17	54	50	3.29529	3.24242	4.3065	0.379799	1.16052	1.1636	3.19106e-06	-1.83649	down
PB.2042	277	210	314	679	876	713	33.9074	27.2146	36.3162	79.2306	93.8667	84.0249	2.34643e-11	1.54915	up
PB.2104	35	25	27	90	131	116	0.510614	0.379955	0.376643	1.26297	1.70241	1.66021	6.66903e-06	1.99173	up
PB.2145	44	59	67	135	161	166	0.791805	1.14643	1.16025	2.36555	2.57724	2.92858	7.07534e-05	1.49048	up
PB.2216	12247	7888	9612	4099	1586	3376	173.923	118.276	129.074	55.5686	19.7339	45.72	7.81078e-06	-1.6462	down
PB.2242	619	384	446	1691	1393	1490	3.6672	2.40447	2.49698	9.54717	7.22028	8.50186	3.34594e-14	1.70761	up
PB.2373	264	395	206	62	75	56	2.68369	4.23863	1.94086	0.594854	0.646719	0.546898	0.000885332	-2.14829	down
PB.2415	435	364	459	147	231	155	8.89877	7.89119	8.87529	2.85717	4.14077	3.04261	6.59616e-06	-1.20315	down
PB.2478	176	193	167	70	65	70	1.78215	2.0702	1.59046	0.669701	0.569857	0.682687	0.000148221	-1.34495	down
PB.2484	31	55	30	83	152	153	0.449251	0.840891	0.404386	1.14043	1.9267	2.13101	0.000345065	1.76259	up
PB.2515	68	140	150	198	288	308	0.664713	1.44257	1.38837	1.82548	2.25005	2.88162	0.00148895	1.19608	up
PB.2528	457	415	447	253	110	237	6.71932	6.45062	6.21708	3.52315	1.41544	3.35641	4.12568e-05	-1.06971	down
PB.2600	103	116	196	49	36	59	1.53699	1.83975	2.76999	0.692502	0.463924	0.847044	0.00124736	-1.45124	down
PB.2670	73	39	79	228	210	337	0.728627	0.406597	0.744148	2.18498	1.84777	3.2679	5.11764e-05	2.0943	up
PB.2760	1155	958	923	360	703	279	11.9837	10.5259	9.05913	3.55707	6.38254	2.78819	0.000419625	-1.16537	down
PB.2796	3588	2643	3946	15432	15851	15549	53.7015	41.9119	55.8551	219.973	207.592	224.091	2.01855e-33	2.25625	up
PB.2797	149	149	227	633	595	529	2.27892	2.40924	3.27739	9.23181	7.97044	7.79209	4.60536e-13	1.79839	up
PB.2800	5519	5495	6762	13685	14156	12943	93.4461	100.443	111	220.53	207.933	209.356	1.59125e-11	1.24598	up
PB.2931	36	45	36	105	119	81	0.641931	0.869494	0.607382	1.81627	1.8926	1.41871	0.00142283	1.40939	up
PB.2934	42	5	5	68	58	46	0.466748	0.051783	0.043095	0.716119	0.562952	0.487899	0.00599059	1.75881	up
PB.2951	3056	3376	1956	519	622	313	23.241	27.1922	14.061	3.75771	4.14053	2.29098	2.96459e-06	-2.51716	down
PB.3062	602	598	572	189	250	162	3.54188	3.72107	3.17916	1.05549	1.28241	0.913826	6.20451e-10	-1.53087	down
PB.3078	62	72	68	30	15	20	0.372966	0.452537	0.382878	0.1674	0.074636	0.111251	0.00428868	-1.58198	down
PB.3195	55	59	47	243	232	208	0.374577	0.422802	0.300816	1.5835	1.38828	1.37419	2.12102e-10	2.11959	up
PB.3469	85	59	55	40	16	7	0.62153	0.424047	0.37474	0.25609	0.089302	0.044565	0.00469482	-1.61849	down
PB.35	305	385	378	132	191	191	4.31039	5.76861	5.04797	1.77584	2.35365	2.5898	0.000260416	-1.01454	down
PB.3517	2925	2619	2784	427	196	472	148.167	140.302	133.191	20.5037	8.73545	22.9097	2.02919e-44	-2.85879	down
PB.3612	243	305	292	830	1093	597	4.84841	6.45346	5.52844	15.8321	19.153	11.5075	1.93735e-06	1.61111	up
PB.3614	710	565	695	1125	1543	1366	13.7628	11.6013	12.7382	20.7958	26.1908	25.509	2.79274e-07	1.07714	up
PB.3616	7055	6161	10270	16617	27941	27490	133.495	122.902	183.746	298.811	461.494	500.308	1.63526e-05	1.67219	up
PB.3977	452	370	343	847	767	852	9.05509	8.37279	7.12623	16.4629	14.2439	16.8301	6.16671e-07	1.12577	up
PB.4036	168	139	119	48	84	47	2.36058	2.0641	1.58	0.638481	1.0244	0.627126	0.00183763	-1.23257	down
PB.4216	64	63	65	237	251	245	2.01479	2.12104	1.95451	7.19977	7.00458	7.52392	9.64153e-10	1.97609	up
PB.4217	488	378	233	126	126	121	6.76014	5.53832	3.04562	1.66309	1.52102	1.60867	0.00615665	-1.52978	down
PB.4230	1974	2004	2116	745	873	725	28.6361	30.7817	29.0042	10.2953	11.0687	10.1127	3.01689e-11	-1.33961	down
PB.4233	423	504	355	93	182	85	11.5011	14.4971	9.11059	2.39288	4.31956	2.22749	2.78791e-06	-1.82492	down
PB.4546	1738	1322	1804	5072	6417	5044	59.5328	47.9477	58.4096	165.616	192.41	166.399	1.42567e-21	1.80915	up
PB.4594	50	28	60	149	182	105	0.497225	0.293264	0.572251	1.42748	1.60654	1.01745	1.21376e-05	1.70919	up
PB.4706	54	5	12	159	238	153	1.46668	0.116417	0.304658	4.13924	5.71723	4.02933	1.6064e-12	2.98451	up
PB.4951	315	274	270	764	684	560	5.72931	5.28271	4.65245	13.2723	10.8974	9.8265	6.90627e-08	1.26444	up
PB.5020	160	162	119	79	48	73	1.73446	1.85508	1.21793	0.810178	0.448885	0.758889	0.00386195	-1.09345	down
PB.5179	1212	833	873	2613	2440	3011	17.0312	12.4246	12.5825	33.4243	27.3042	36.9949	9.17929e-10	1.51555	up
PB.5196	760	721	792	344	430	253	16.8169	16.8907	16.5644	7.25651	8.32155	5.38514	1.77991e-06	-1.11422	down
PB.5197	1410	1056	1441	2709	3069	2701	28.8869	22.6197	27.981	53.2007	55.508	52.5958	2.73087e-09	1.1656	up
PB.533	996	914	930	443	499	330	20.6899	20.1164	18.2677	8.75716	9.07751	6.60399	4.8843e-07	-1.12552	down
PB.5675	1532	1443	1665	3076	2998	3006	27.1837	27.1071	27.927	52.0133	46.5514	51.3628	2.15069e-07	1.01676	up
PB.5830	33130	29981	40016	88345	110940	94886	606.752	581.591	693.059	1542.9	1780.13	1675.3	1.01372e-17	1.55877	up
PB.5901	203	199	156	114	90	63	3.54606	3.68549	2.57463	1.89042	1.3778	1.06096	0.00317031	-1.0318	down
PB.6034	230	175	226	910	950	777	4.4179	3.56893	4.10234	16.704	16.0024	14.403	6.37943e-20	2.10851	up
PB.6191	64	100	53	14	16	0	1.01055	1.66817	0.785102	0.20731	0.211152	0	0.000205854	-2.86934	down
PB.6480	2506	2174	2943	5637	7078	6280	111.102	102.009	123.352	238.143	274.592	268.107	3.8753e-13	1.36484	up
PB.6618	3252	3355	4514	6578	9375	6244	154.401	168.676	202.643	297.665	389.564	285.492	2.78738e-06	1.03725	up
PB.6698	129	80	91	227	367	238	1.17311	0.805849	0.747527	1.85496	2.7406	2.24554	3.78407e-06	1.50143	up
PB.6854	61	90	75	6	0	5	0.32432	0.50851	0.379163	0.029729	0	0.025195	1.05571e-10	-4.27616	down
PB.6912	769	634	617	282	425	200	8.3231	7.26285	6.30792	2.90957	4.02589	2.07889	2.43491e-05	-1.13492	down
PB.6979	69	42	42	9	20	13	0.888676	0.569109	0.511637	0.100339	0.227193	0.152333	0.00532177	-1.8423	down
PB.7101	465	578	412	294	163	108	3.39098	4.2682	2.88479	1.9052	1.09439	0.663051	0.00236742	-1.3315	down
PB.7191	274	173	293	686	752	699	4.85791	3.24655	4.89778	11.5927	11.6574	11.9252	1.82644e-11	1.58497	up
PB.7205	178	93	134	260	376	269	5.40341	2.99584	3.85463	7.53736	9.9871	7.86094	3.21904e-05	1.19916	up
PB.7417	718	691	381	93	68	21	12.6474	12.9582	6.26312	1.58262	1.01737	0.245796	7.62037e-07	-3.28514	down
PB.7608	563	337	247	2338	1856	1939	10.7604	6.697	4.3969	42.1862	31.0173	35.2498	2.75671e-18	2.45596	up
PB.7688	101	78	67	455	332	203	0.860231	0.700847	0.542536	3.71739	2.48801	1.67759	0.000901335	2.04147	up
PB.8012	2180	2324	1745	409	438	317	33.9724	38.3516	25.7077	6.06322	5.96756	4.75412	1.17724e-13	-2.39745	down
PB.8164	299	332	230	137	131	97	4.26069	5.01957	3.09621	1.86243	1.63547	1.33382	0.000290458	-1.2114	down
PB.8312	80	112	71	4	21	14	0.613263	0.902547	0.508196	0.022215	0.140524	0.102761	1.38095e-06	-2.74816	down
PB.8341	3952	3756	3409	8023	7521	7891	41.0293	41.062	33.2454	79.5782	68.3342	78.7273	2.10081e-09	1.11801	up
PB.845	2913	3002	3521	6547	6957	6876	47.5911	51.6827	54.3297	102.177	99.6159	108.413	7.24814e-10	1.15894	up
PB.8564	82	97	81	24	54	11	1.00871	1.27432	0.94357	0.283654	0.579282	0.123448	0.00223017	-1.55194	down
PB.8588	838	577	870	1698	1685	2607	13.4441	9.79919	13.1908	25.9586	23.6501	40.2715	0.0014867	1.45567	up
PB.8592	1079	1437	1378	4303	4601	3703	14.7293	21.0542	18.0293	56.7783	54.3976	49.3702	1.17825e-19	1.73234	up
PB.8611	97	139	94	34	33	31	2.23927	3.40503	2.04203	0.736797	0.667528	0.682181	0.000117082	-1.72075	down
PB.8653	683	701	608	51	146	108	11.0144	11.9626	9.26674	0.770244	2.0534	1.67524	1.55485e-25	-2.68549	down
PB.8658	86	74	159	236	248	283	1.67724	1.54245	2.94767	4.41951	4.26152	5.3635	1.94828e-05	1.33702	up
PB.9045	4635	4183	7713	10471	15524	11741	94.8262	90.6128	149.216	204.185	277.981	231.333	9.86759e-07	1.24367	up
PB.9343	15	19	23	93	61	73	0.205683	0.279648	0.305876	1.28003	0.770368	1.01847	0.000133086	2.05215	up
PB.9720	772	968	765	288	322	201	11.6903	15.5645	10.9461	4.13434	4.2658	2.94404	3.00807e-08	-1.60194	down
PB.9763	267	282	206	100	175	73	5.56179	6.22751	4.04892	1.98625	3.19403	1.45453	0.00408365	-1.10975	down
PB.987	793	552	453	103	69	51	7.5955	5.59642	4.1041	0.940822	0.57204	0.464936	8.13678e-08	-2.97572	down
PB.9923	47	90	60	0	0	10	0.693698	1.45565	0.856957	0	0	0.13803	5.8587e-07	-4.20061	down
PB.9985	1020	978	952	426	467	324	36.7341	37.3086	32.4097	14.6053	14.7046	11.2369	2.1141e-08	-1.24396	down
Zjn_sc00001.1.g00190.1.sm.mkhc	1725	1676	1905	3311	3299	4267	15.8578	17.3108	17.5631	29.6784	26.0977	35.5207	2.47384e-05	1.08935	up
Zjn_sc00001.1.g00230.1.am.mk	19	35	9	72	48	57	0.351816	0.691165	0.159969	1.29391	0.779394	1.024	0.00847483	1.50514	up
Zjn_sc00001.1.g00250.1.am.mk	110	81	94	260	301	301	4.7089	3.65832	3.78518	10.6303	11.281	12.4456	4.34227e-08	1.64224	up
Zjn_sc00001.1.g00420.1.am.mkhc	62	86	76	224	135	197	0.661262	1.12843	0.822458	2.49334	1.25437	2.0266	0.00111787	1.36416	up
Zjn_sc00001.1.g00810.1.sm.mkhc	2584	1854	2908	733	284	689	22.2402	16.8488	24.6834	6.14189	2.23734	5.88035	1.1178e-11	-2.02656	down
Zjn_sc00001.1.g00880.1.sm.mkhc	4961	4577	3658	1803	1528	1287	35.7929	34.7524	24.3602	11.8372	9.59478	8.89076	1.6969e-07	-1.48008	down
Zjn_sc00001.1.g01080.1.am.mk	286	363	255	92	90	101	15.0087	20.149	12.6415	4.58361	4.10214	5.05931	4.10969e-06	-1.63946	down
Zjn_sc00001.1.g01175.1.br	9286	9415	6726	3398	1366	2834	105.189	112.961	297.136	36.7143	15.3217	30.8826	1.22924e-05	-1.68835	down
Zjn_sc00001.1.g01200.1.sm.mk	752	571	470	1148	1905	1069	10.4968	8.4436	6.46687	15.1407	22.6894	14.7997	0.00153397	1.21883	up
Zjn_sc00001.1.g01220.1.sm.mkhc	1926	1792	2002	763	975	769	24.0971	23.8241	23.7463	9.1541	11.4032	9.15758	1.46747e-08	-1.15135	down
Zjn_sc00001.1.g01230.1.sm.mk	42	42	32	73	170	132	2.61747	2.74756	1.89764	4.36686	9.33607	7.97825	0.00140113	1.71391	up
Zjn_sc00001.1.g01280.1.sm.mk	2098	2336	2487	259	293	130	163.21	192.384	182.869	19.1645	19.912	9.71109	3.13521e-53	-3.31531	down
Zjn_sc00001.1.g01550.1.sm.mkhc	10754	8186	8731	4122	4121	3709	78.027	62.8292	58.9312	27.8216	25.6466	24.5801	2.58996e-09	-1.16906	down
Zjn_sc00001.1.g01590.1.sm.mkhc	1712	1711	2119	722	1343	596	43.5112	45.0181	49.3454	16.753	28.3787	13.8417	5.57642e-05	-1.03415	down
Zjn_sc00001.1.g01830.1.sm.mkhc	674	642	514	211	246	162	9.053	9.10191	6.52193	2.72597	2.91885	2.11103	1.43343e-08	-1.53813	down
Zjn_sc00001.1.g01870.1.am.mk	5868	5013	7645	2416	2368	2439	82.0888	74.2808	101.15	32.2073	28.939	32.8487	7.18055e-11	-1.30143	down
Zjn_sc00001.1.g01960.1.am.mkhc	1082	1284	934	539	561	356	12.7653	16.181	10.3981	6.02129	5.78971	3.99888	0.000237421	-1.15655	down
Zjn_sc00001.1.g01970.1.sm.mkhc	1022	1131	861	264	219	164	22.7433	26.6428	18.118	5.5881	4.26197	3.49696	1.8858e-12	-2.18839	down
Zjn_sc00001.1.g01990.1.sm.mkhc	111	87	66	6	22	13	1.28301	1.06534	0.717593	0.064131	0.2176	0.137401	6.28328e-07	-2.67804	down
Zjn_sc00001.1.g02060.1.am.mk	502	481	332	123	132	31	29.5266	29.9886	18.4654	6.85915	6.76142	1.72425	1.68086e-06	-2.19399	down
Zjn_sc00001.1.g02100.1.am.mkhc	178	150	127	75	94	51	2.20161	1.96412	1.48172	0.879538	1.01147	0.597988	0.00750452	-1.02632	down
Zjn_sc00001.1.g02370.1.am.mk	116	154	154	32	109	36	0.97416	1.3707	1.22346	0.253533	0.798176	0.286291	0.00702561	-1.25718	down
Zjn_sc00001.1.g02540.1.am.mk	16	10	0	251	394	211	0.297419	0.199929	0	4.52141	6.52871	3.83353	5.97953e-18	5.02666	up
Zjn_sc00001.1.g02920.1.sm.mkhc	2497	2530	2352	556	733	356	56.2473	60.3427	50.1014	11.9203	14.451	7.71873	7.95975e-26	-2.14309	down
Zjn_sc00001.1.g02930.1.sm.mk	1418	1332	1003	338	276	181	41.5504	41.3345	27.7741	9.41805	7.06129	5.1052	7.08458e-10	-2.21017	down
Zjn_sc00001.1.g03010.1.sm.mk	359	517	392	138	152	64	13.4944	20.5821	13.9264	4.93234	4.98721	2.31208	7.12178e-06	-1.82375	down
Zjn_sc00001.1.g03180.1.sm.mkhc	61	38	34	135	183	184	1.41754	0.925703	0.746207	3.01713	3.76436	4.17407	1.47933e-07	1.95269	up
Zjn_sc00001.1.g03310.1.sm.mkhc	2010	1951	2092	3843	3897	4124	25.2676	23.5903	24.8822	46.1604	42.9414	49.9813	1.32399e-07	1.01773	up
Zjn_sc00001.1.g03540.1.sm.mk	1570	1970	1397	367	1134	450	14.975	19.9006	12.603	3.33682	10.5225	4.44156	0.00516973	-1.34171	down
Zjn_sc00001.1.g03760.1.sm.mkhc	6628	7447	8935	20325	15823	17726	102.357	121.975	130.749	299.693	213.863	263.91	1.79436e-08	1.28214	up
Zjn_sc00001.1.g03830.1.sm.mkhc	17511	18983	19601	5285	8647	5919	398.114	455.756	411.581	106.152	165.479	118.637	2.06659e-15	-1.46812	down
Zjn_sc00001.1.g04040.1.sm.mkhc	932	1003	1008	356	426	368	21.5059	22.3507	22.7663	7.52176	8.59378	8.1	2.67761e-09	-1.3169	down
Zjn_sc00001.1.g04110.1.am.mk	463	692	383	96	104	41	18.8019	29.7464	14.694	3.70034	3.6823	1.59459	4.57091e-05	-2.66705	down
Zjn_sc00001.1.g04140.1.am.mk	287	350	257	67	90	39	4.38007	5.64724	3.70361	0.973463	1.19981	0.568569	2.84232e-09	-2.1765	down
Zjn_sc00001.1.g04290.1.sm.mkhc	584	584	525	1100	1093	1119	11.1445	11.7967	9.4817	20.0274	18.2744	20.5983	2.68077e-06	1.00898	up
Zjn_sc00001.1.g04300.1.sm.mkhc	1943	2527	2093	4829	4855	4995	18.7516	19.2951	17.3042	33.0256	32.9659	36.15	2.00691e-10	1.20016	up
Zjn_sc00001.1.g04510.1.sm.mkhc	1505	1462	1095	339	422	199	23.2176	23.879	15.9756	4.9795	5.68953	2.94679	3.3883e-09	-2.06487	down
Zjn_sc00001.1.g04920.1.sm.mkhc	506	307	388	912	987	959	6.80133	4.36504	4.94305	11.6609	11.6103	12.3843	4.19301e-09	1.2976	up
Zjn_sc00001.1.g04960.1.sm.mkhc	337	345	455	820	1068	645	8.16351	8.83836	10.4239	18.9376	22.6495	15.0544	2.71047e-06	1.19401	up
Zjn_sc00001.1.g05070.1.am.mk	297	202	226	168	89	91	11.0018	7.92025	7.92434	5.92365	2.88832	3.23237	0.00742666	-1.00691	down
Zjn_sc00001.1.g05420.1.am.mk	351	371	320	798	1055	731	9.22969	10.4648	7.68765	20.6081	24.8227	19.0255	1.61536e-09	1.33784	up
Zjn_sc00001.1.g05510.1.am.mkhc	3778	3437	4067	11358	11061	10628	31.9211	34.3652	36.3636	97.3651	86.438	92.8361	6.7414e-18	1.59837	up
Zjn_sc00001.1.g05940.1.sm.mkhc	6708	8787	6103	1735	1679	1129	164.641	225.851	142.938	40.4538	36.4603	27.049	4.52105e-08	-2.22448	down
Zjn_sc00001.1.g06260.1.sm.mkhc	764	861	838	264	412	250	15.7488	18.7002	16.2729	5.14434	7.37859	4.92489	1.9387e-09	-1.38496	down
Zjn_sc00001.1.g06280.1.am.mk	97	118	46	9	24	10	2.08424	2.69607	0.935276	0.171708	0.437319	0.192526	0.00271201	-2.61584	down
Zjn_sc00001.1.g06300.1.sm.mkhc	2511	1899	1925	369	316	337	55.1218	43.6155	40.088	7.95442	6.02913	6.66222	3.02257e-19	-2.58614	down
Zjn_sc00001.1.g06320.1.am.mk	122	111	144	37	60	23	2.57791	2.47718	2.86718	0.74552	1.10211	0.462308	0.000117658	-1.627	down
Zjn_sc00001.1.g06450.1.am.mk	536	486	405	73	110	42	9.41314	9.03785	6.72602	1.21068	1.69021	0.704268	1.39834e-16	-2.65299	down
Zjn_sc00001.1.g06590.1.sm.mk	92	151	94	32	43	23	4.63006	8.0411	4.49094	1.5243	1.90288	1.10635	0.00169794	-1.76991	down
Zjn_sc00001.1.g06730.1.sm.mk	417	228	207	1105	1440	961	8.7936	5.03666	4.03643	21.9727	27.1764	19.6073	4.35363e-15	2.06763	up
Zjn_sc00001.1.g06810.1.sm.mkhc	16490	20030	20697	5224	6678	5086	384.664	490.018	451.869	114.787	134.959	111.728	1.43347e-20	-1.71556	down
Zjn_sc00001.1.g06850.1.am.mk	1206	1592	1036	266	419	195	77.0314	107.75	62.5817	16.1822	23.4154	11.9571	4.754e-06	-2.11508	down
Zjn_sc00001.1.g06980.1.sm.mk	9479	9955	5110	1858	1690	894	270.454	300.738	137.849	50.5047	42.1888	24.5585	0.000108475	-2.4524	down
Zjn_sc00001.1.g07100.1.sm.mkhc	1652	1442	1950	4434	3353	3423	20.5629	20.5448	23.8458	53.7057	38.3231	43.518	1.63214e-06	1.20792	up
Zjn_sc00001.1.g07370.1.am.mk	705	568	1046	1727	1290	1497	5.8207	4.96792	8.16992	13.6195	9.34222	11.946	0.000425139	1.02934	up
Zjn_sc00001.1.g07470.1.sm.mkhc	1204	1111	996	426	460	465	13.7333	13.181	10.8571	4.77235	4.68201	5.34769	7.45477e-09	-1.2537	down
Zjn_sc00001.1.g07530.1.sm.mk	1081	1326	1022	271	402	297	23.6935	30.7893	21.1914	5.65132	7.71242	6.26782	1.95001e-09	-1.79713	down
Zjn_sc00001.1.g07640.1.am.mk	132	175	159	386	437	369	4.36222	6.14284	4.9824	12.2062	12.6926	11.8102	1.8373e-07	1.39107	up
Zjn_sc00001.1.g07660.1.am.mkhc	931	946	848	365	547	340	21.6679	23.3225	18.6502	8.09118	11.1311	7.60958	1.36629e-06	-1.09743	down
Zjn_sc00001.1.g07670.1.sm.mkhc	2765	2920	1961	565	700	420	69.4909	77.7042	46.598	13.521	15.382	10.1557	9.76025e-08	-2.16388	down
Zjn_sc00001.1.g07720.1.am.mk	1599	1797	1282	485	531	506	20.3817	24.3116	15.2996	5.28998	5.31056	5.38346	6.22608e-07	-1.5883	down
Zjn_sc00001.1.g07840.1.sm.mkhc	203	98	257	719	790	846	1.82587	1.13173	2.65587	7.51799	7.46582	8.47055	2.42243e-19	2.14702	up
Zjn_sc00001.1.g07930.1.sm.mk	65	76	82	166	210	170	1.26648	1.59	1.51513	3.12185	3.61789	3.23568	0.000122026	1.33112	up
Zjn_sc00001.1.g08070.1.sm.mkhc	2313	2415	2503	1185	1285	874	42.3875	45.4604	45.5196	20.6506	20.6079	15.3151	7.25068e-08	-1.07719	down
Zjn_sc00001.1.g08150.1.am.mk	13006	10058	10592	21831	26302	21001	145.944	124.862	109.397	235.471	261.308	228.387	3.90475e-09	1.07554	up
Zjn_sc00001.1.g08410.1.am.mk	752	667	636	152	188	51	14.3042	13.4426	11.4422	2.74662	3.12951	0.919984	2.57315e-21	-2.37942	down
Zjn_sc00001.1.g08470.1.sm.mk	23	19	20	127	221	78	1.09591	0.957113	0.885788	5.91028	9.46463	3.65703	0.000475332	2.79514	up
Zjn_sc00001.1.g08530.1.am.mk	1734	1490	1735	5519	7000	4664	65.3417	59.47	61.8492	198.306	231.017	169.333	6.12347e-19	1.82869	up
Zjn_sc00001.1.g08870.1.sm.mkhc	904	1008	878	419	514	362	14.6522	17.311	13.4606	6.47216	7.29258	5.65079	1.7154e-06	-1.07803	down
Zjn_sc00001.1.g09170.1.am.mk	102	102	84	25	27	23	8.48461	8.95467	6.54163	1.97608	1.96765	1.8001	7.41964e-05	-1.90792	down
Zjn_sc00001.1.g09580.1.sm.mkhc	10930	13512	14988	5368	7133	5157	352.072	460.826	456.447	164.769	201.067	159.958	2.15789e-09	-1.12179	down
Zjn_sc00001.1.g09740.1.sm.mkhc	98	173	87	42	35	7	4.52096	8.45962	3.79525	1.81375	1.40568	0.28129	0.0093734	-2.08948	down
Zjn_sc00001.1.g10050.1.am.mk	104	192	143	31	29	21	1.64454	3.18579	2.21616	0.48291	0.346414	0.298733	3.21904e-05	-2.40937	down
Zjn_sc00001.1.g10120.1.am.mk	70	68	43	29	22	7	2.18236	2.25795	1.27279	0.842956	0.597564	0.207821	0.00667697	-1.62622	down
Zjn_sc00001.1.g10260.1.am.mk	1176	1145	1040	233	281	197	32.3177	33.3068	27.0228	6.07831	6.74804	5.19973	7.24416e-23	-2.2106	down
Zjn_sc00001.1.g10320.1.sm.mkhc	190	110	119	7	26	13	3.89532	2.49037	2.33953	0.100896	0.462858	0.259653	1.62482e-07	-3.17506	down
Zjn_sc00001.1.g10360.1.am.mk	1266	1326	851	78	138	54	41.5652	46.1259	26.4151	2.42277	3.94285	1.67785	2.10806e-12	-3.67	down
Zjn_sc00001.1.g10660.1.am.mkhc	98	51	72	148	138	142	4.28883	2.35412	2.96528	6.16167	5.2836	5.99842	0.00873488	1.00523	up
Zjn_sc00001.1.g10900.1.sm.mkhc	10043	8674	11162	20692	22549	19772	125.422	113.156	134.837	244.651	246.255	243.202	1.08158e-09	1.12361	up
Zjn_sc00001.1.g11150.1.sm.mkhc	164	130	139	420	430	366	3.30968	2.83154	3.54408	9.27376	8.7104	8.56812	1.07692e-08	1.53051	up
Zjn_sc00001.1.g11730.1.am.mk	2129	2763	2125	386	901	275	121.062	166.321	114.215	20.8946	44.8427	15.0124	3.53883e-08	-2.16908	down
Zjn_sc00001.1.g11760.1.sm.mkhc	5927	7558	6318	1253	1739	920	248.913	336.116	250.85	50.1489	63.8964	37.176	2.3873e-15	-2.31939	down
Zjn_sc00001.1.g12030.1.sm.mkhc	405	360	341	121	156	159	2.41783	2.28157	1.93533	0.72611	0.830508	0.962417	2.41521e-06	-1.30318	down
Zjn_sc00001.1.g12350.1.am.mk	1385	1596	1205	454	515	226	32.9074	40.1049	27.0671	10.3635	10.6925	5.16839	5.5382e-08	-1.79169	down
Zjn_sc00001.1.g12360.1.sm.mkhc	24163	24765	27028	8944	8760	6521	174.878	192.784	182.108	60.9723	54.3259	44.6947	1.74483e-18	-1.60846	down
Zjn_sc00001.1.g12470.1.am.mk	137	155	131	642	517	274	3.21954	3.87265	2.92367	14.4472	10.684	6.21316	0.00242728	1.78949	up
Zjn_sc00001.1.g12480.1.am.mk	245	157	197	606	531	451	3.77727	2.56194	2.87301	8.92669	7.18371	6.71238	5.80936e-09	1.45274	up
Zjn_sc00001.1.g13110.1.am.mk	0	0	0	69	51	39	0	0	0	4.864	3.29098	2.77453	1.09792e-12	Inf	up
Zjn_sc00002.1.g00280.1.sm.mkhc	476	322	397	2388	2327	2932	6.19176	4.41083	4.8834	29.6432	26.504	36.7436	1.79554e-19	2.73178	up
Zjn_sc00002.1.g00430.1.am.mk	2358	1004	2175	4949	8308	4972	65.2224	29.4065	56.8775	130.514	201.189	132.483	1.19883e-05	1.76227	up
Zjn_sc00002.1.g00470.1.sm.mkhc	13977	11637	11137	31464	37943	35486	158.739	138.945	127.142	344.306	388.183	369.757	1.34538e-17	1.55133	up
Zjn_sc00002.1.g00600.1.sm.mk	192	174	161	50	80	79	2.59946	2.49431	2.05456	0.652858	0.948474	1.0276	0.000286993	-1.29773	down
Zjn_sc00002.1.g00710.1.sm.mk	4059	2827	2963	652	770	622	63.3177	43.8307	41.129	9.68267	10.5061	9.28016	2.16594e-11	-2.23167	down
Zjn_sc00002.1.g00760.1.sm.mk	805	732	612	134	81	90	18.252	17.509	12.8687	2.58992	1.67074	2.00223	2.14404e-19	-2.77202	down
Zjn_sc00002.1.g01200.1.sm.mkhc	2288	2342	2095	628	942	463	64.9721	70.4154	56.2516	16.9877	23.414	12.6633	5.70925e-16	-1.7066	down
Zjn_sc00002.1.g01360.1.sm.mkhc	772	821	767	336	461	330	15.1586	17.0539	14.2287	6.28591	7.91777	6.21442	8.00795e-06	-1.0359	down
Zjn_sc00002.1.g01410.1.am.mkhc	1550	917	1333	3760	4110	2515	29.5033	18.4832	23.9929	68.2287	68.484	46.1156	5.6198e-07	1.49097	up
Zjn_sc00002.1.g01520.1.am.mkhc	416	252	248	1136	1245	1301	9.1962	5.97562	5.11815	23.7743	23.3604	27.1623	3.71251e-21	2.04861	up
Zjn_sc00002.1.g01600.1.am.mk	38	24	26	164	142	195	0.906023	0.584652	0.571373	3.71816	2.94969	4.46598	5.93015e-11	2.56186	up
Zjn_sc00002.1.g01690.1.sm.mkhc	15151	17802	15624	6033	8999	6541	242.977	302.56	236.936	92.2062	126.34	101.047	1.4593e-08	-1.14296	down
Zjn_sc00002.1.g01740.1.am.mk	375	417	181	109	89	75	10.7549	12.666	4.91055	2.97667	2.23761	2.07287	0.00852357	-1.81388	down
Zjn_sc00002.1.g02150.1.am.mkhc	619	684	893	361	380	292	17.4635	20.4569	23.8476	9.75993	9.41337	7.9242	6.98232e-06	-1.0416	down
Zjn_sc00002.1.g02530.1.sm.mk	6053	4704	7163	14529	13409	10962	253.148	207.986	282.903	582.957	488.779	436.913	3.1014e-10	1.17042	up
Zjn_sc00002.1.g02830.1.am.mk	9593	7163	8828	18675	21420	23661	148.399	117.339	129.13	275.348	290.01	352.507	1.20647e-11	1.36733	up
Zjn_sc00002.1.g02870.1.sm.mkhc	19031	17438	21601	53595	49159	54007	262.693	254.842	282.069	705.627	594.113	718.409	4.58805e-16	1.48571	up
Zjn_sc00002.1.g02930.1.sm.mkhc	2239	2055	2576	4790	4570	5585	13.4195	12.9632	14.6014	27.2177	23.8376	31.9669	1.44262e-08	1.17688	up
Zjn_sc00002.1.g03040.1.cf.mkhc	156	151	129	329	366	275	7.85965	8.02215	6.15147	15.7824	16.1655	13.3362	2.31832e-05	1.18471	up
Zjn_sc00002.1.g03130.1.am.mk	969	757	652	499	343	241	19.8265	16.3999	14.2924	9.71745	6.14039	7.39211	0.00401021	-1.09885	down
Zjn_sc00002.1.g03510.1.sm.mkhc	6715	6885	6083	2388	2732	1422	118.938	128.397	101.033	42.4408	41.9252	23.3317	1.53629e-13	-1.56485	down
Zjn_sc00002.1.g03630.1.sm.mkhc	92	119	109	196	230	274	1.24273	1.58353	1.57246	2.7449	2.46894	3.29875	0.000195024	1.17378	up
Zjn_sc00002.1.g03810.1.sm.mk	52	45	50	139	157	134	0.984246	0.896975	0.889182	2.52032	2.62672	2.45383	4.02333e-05	1.58991	up
Zjn_sc00002.1.g03920.1.sm.mk	68	60	78	155	151	187	3.66173	3.36697	3.97259	7.92387	7.08023	9.69582	0.000306756	1.31569	up
Zjn_sc00002.1.g04040.1.am.mk	168	133	114	15	49	17	8.11778	6.79591	5.22603	0.682818	2.04481	0.752751	4.01893e-08	-2.35842	down
Zjn_sc00002.1.g04090.1.sm.mkhc	803	617	727	1567	1588	1368	12.3028	10.0175	10.4849	22.805	21.266	20.1313	6.31541e-08	1.11895	up
Zjn_sc00002.1.g04330.1.am.mkhc	1530	1095	947	3270	3193	3418	7.78819	5.92119	5.60675	16.5295	14.9725	17.8129	5.47277e-15	1.50811	up
Zjn_sc00002.1.g04350.1.am.mk	1207	890	1089	3038	2408	2420	7.76236	6.05617	6.60109	18.593	13.5345	14.9592	3.02519e-09	1.35465	up
Zjn_sc00002.1.g04390.1.sm.mkhc	153	139	110	54	22	59	1.07959	1.04848	0.735278	0.356933	0.148289	0.397541	0.000138282	-1.51243	down
Zjn_sc00002.1.g04530.1.am.mk	196	219	208	441	506	444	2.7435	3.24602	2.72909	5.26413	6.14497	5.98065	2.60754e-06	1.19668	up
Zjn_sc00002.1.g04650.1.sm.mkhc	505	580	657	289	336	174	6.20948	7.54902	7.64126	3.38254	3.61854	2.06068	9.45466e-06	-1.09213	down
Zjn_sc00002.1.g04710.1.am.mk	286	181	340	1108	738	1272	4.0491	2.71339	4.55698	24.3315	9.15101	17.3533	5.58404e-05	2.02608	up
Zjn_sc00002.1.g04780.1.am.mkhc	1291	1354	1107	655	725	420	25.9573	27.2456	20.6311	12.3564	12.3458	6.83228	3.2827e-05	-1.0351	down
Zjn_sc00002.1.g04900.1.sm.mkhc	1500	1379	1500	521	1015	397	47.4334	46.1698	44.8481	15.7041	28.0934	12.0813	1.10106e-05	-1.16351	down
Zjn_sc00002.1.g05070.1.sm.mk	152	175	210	90	109	56	2.63314	3.20979	3.43241	1.47936	1.64538	0.923636	0.003413	-1.04089	down
Zjn_sc00002.1.g05130.1.am.mkhc	6591	5880	7224	2768	2015	2322	106.942	100.684	109.849	42.8642	28.6604	36.3297	2.66192e-14	-1.41535	down
Zjn_sc00002.1.g05200.1.sm.mk	324	289	300	1161	906	1275	4.75327	4.48087	4.15314	16.2472	11.6408	18.0339	9.37172e-09	1.92609	up
Zjn_sc00002.1.g05240.1.sm.mkhc	63	128	75	209	161	263	1.25318	2.71441	1.424	4.0032	2.83616	5.09406	0.00750452	1.29134	up
Zjn_sc00002.1.g05260.1.sm.mk	31	3	9	61	52	65	0.610631	0.043167	0.170756	1.16606	0.912751	1.24958	0.000531274	2.10601	up
Zjn_sc00002.1.g05330.1.am.mkhc	87	101	82	24	56	24	1.43139	1.75662	1.26973	0.362791	0.798397	0.371211	0.00534597	-1.36919	down
Zjn_sc00002.1.g05600.1.am.mkhc	2546	1820	2378	5745	5351	6562	18.5137	14.7937	16.7344	39.5015	33.7585	46.1132	1.90141e-10	1.44432	up
Zjn_sc00002.1.g05820.1.am.mk	220	1347	2033	3250	3946	3105	1.89001	12.3739	16.6889	26.9079	29.9997	25.9807	1.38456e-05	1.57411	up
Zjn_sc00002.1.g05850.1.sm.mkhc	148	145	168	264	314	321	1.56282	1.63542	1.67179	2.66456	2.9271	3.31605	0.000490718	1.01078	up
Zjn_sc00002.1.g05940.1.sm.mkhc	80	72	71	255	241	249	0.595256	0.532407	0.587921	1.73894	1.57613	1.72163	1.88355e-08	1.78422	up
Zjn_sc00002.1.g05970.1.sm.mkhc	1997	1706	1905	3904	3222	3938	9.71445	8.70032	8.93785	18.5315	14.0585	18.6712	8.13122e-07	1.03289	up
Zjn_sc00002.1.g06090.1.am.mk	7201	9474	8109	4176	3491	2260	207.757	253.218	193.514	100.456	86.6106	54.9382	9.07816e-06	-1.28745	down
Zjn_sc00002.1.g06210.1.am.mk	22	14	26	293	186	203	0.483382	0.317792	0.550595	6.35942	3.69296	4.43529	2.64538e-11	3.52613	up
Zjn_sc00002.1.g06380.1.sm.mkhc	8743	7543	10313	19011	15399	20345	70.7097	65.2516	78.194	147.221	112.606	161.653	2.00831e-05	1.10269	up
Zjn_sc00002.1.g06750.1.sm.mkhc	1826	1224	1325	2612	4400	2970	24.8388	16.8121	16.8269	34.7675	47.132	39.7565	0.000126724	1.21936	up
Zjn_sc00002.1.g06850.1.sm.mkhc	358	462	290	700	870	1011	2.55642	3.48746	1.96034	4.76341	5.42768	6.96532	8.10218e-05	1.24927	up
Zjn_sc00002.1.g06880.1.sm.mkhc	744	753	731	283	349	279	33.0045	35.3677	30.6813	11.9587	13.5551	11.8983	7.48034e-08	-1.25494	down
Zjn_sc00002.1.g07410.1.sm.mk	183	107	91	28	40	30	4.33621	2.67132	2.02591	0.630972	0.824159	0.66473	0.00266106	-1.93193	down
Zjn_sc00002.1.g07450.1.sm.mk	18	55	22	175	109	117	0.244074	0.817076	0.292887	2.36107	1.34773	2.01743	7.71772e-05	2.09848	up
Zjn_sc00002.1.g07480.1.am.mk	105	127	172	287	283	268	1.5715	2.02953	2.45099	4.12534	3.72735	3.88916	0.000212834	1.10618	up
Zjn_sc00002.1.g07520.1.sm.mk	77	41	65	30	13	9	2.95616	1.62146	2.33121	1.03384	0.421267	0.340762	0.00286988	-1.75763	down
Zjn_sc00002.1.g07580.1.sm.mkhc	52827	49746	33249	11362	12063	5298	539.752	533.469	322.782	107.628	105.832	50.345	1.1222e-06	-2.22676	down
Zjn_sc00002.1.g07640.1.sm.mkhc	53585	52987	32403	10254	9224	3647	614.138	641.991	350.581	111.713	91.8956	39.9279	1.15774e-06	-2.57341	down
Zjn_sc00002.1.g07680.1.sm.mkhc	1964	1751	2046	5859	5250	5935	13.2562	12.8013	13.2129	38.8882	32.3253	40.0052	1.42981e-17	1.61668	up
Zjn_sc00002.1.g07770.1.sm.mkhc	630	1276	1127	253	253	224	9.83746	21.133	16.6719	3.76182	3.46194	3.36302	0.000290558	-2.01645	down
Zjn_sc00002.1.g07800.1.sm.mk	1175	931	676	148	170	101	8.27777	6.94714	4.50639	0.984756	1.04326	0.683969	1.19214e-07	-2.71008	down
Zjn_sc00002.1.g07930.1.am.mk	48	60	24	104	168	87	1.39573	1.85909	0.647516	1.00816	3.11591	2.44103	0.00208587	1.44153	up
Zjn_sc00002.1.g07970.1.am.mk	965	910	773	271	375	249	31.1959	31.2283	23.525	8.32973	10.5106	7.77804	4.47915e-11	-1.53957	down
Zjn_sc00002.1.g08110.1.sm.mkhc	1346	1464	1547	603	1160	365	43.7369	50.3879	47.541	18.6804	32.9981	11.4142	0.0033461	-1.02185	down
Zjn_sc00002.1.g08150.1.am.mk	609	665	463	92	101	41	10.972	12.4802	8.35961	1.56136	1.72464	0.638063	5.32899e-12	-2.87816	down
Zjn_sc00002.1.g08220.1.sm.mkhc	5836	4571	5217	12685	11430	16077	46.9331	38.9351	39.838	97.7435	80.7115	124.754	1.25156e-05	1.41867	up
Zjn_sc00002.1.g08390.1.sm.mkhc	1200	786	1306	2923	2784	3334	7.13694	5.3259	7.74989	17.1654	15.2147	20.252	1.88245e-11	1.51945	up
Zjn_sc00002.1.g08440.1.am.mk	270	336	122	18	36	9	6.47417	8.53419	2.75741	0.394775	0.743499	0.187715	0.000322058	-3.55187	down
Zjn_sc00002.1.g08450.1.am.mk	607	848	824	255	317	302	7.17267	11.249	9.76729	3.0189	3.27301	3.43948	1.65457e-07	-1.34221	down
Zjn_sc00002.1.g08540.1.sm.mk	7	0	6	42	47	48	0.481957	0	0.408614	2.96608	3.02741	3.42795	9.99289e-06	3.47931	up
Zjn_sc00002.1.g08760.1.am.mk	4066	3000	3354	8585	9067	7507	37.164	29.5053	29.5892	75.3338	72.8846	66.7377	1.51153e-12	1.31258	up
Zjn_sc00002.1.g08780.1.sm.mkhc	615	669	766	285	477	231	8.18776	9.42154	9.63477	3.60547	5.5515	2.95852	2.10771e-05	-1.02023	down
Zjn_sc00002.1.g09010.1.sm.mkhc	2871	3201	4302	7226	5907	8505	39.2082	46.0373	56.046	93.4576	70.2675	111.494	0.000573138	1.12457	up
Zjn_sc00002.1.g09050.1.sm.mkhc	521	591	521	1274	1171	1260	6.57234	8.01758	6.36327	15.805	13.4284	16.2994	7.11491e-09	1.22433	up
Zjn_sc00002.1.g09110.1.sm.mkhc	8	13	5	52	62	45	0.297163	0.516209	0.145636	1.87385	2.04416	1.63625	7.66519e-05	2.61988	up
Zjn_sc00002.1.g09200.1.am.mk	618	680	384	48	110	69	6.18194	7.37571	3.82774	0.473511	1.09304	0.765855	8.73362e-07	-2.88232	down
Zjn_sc00002.1.g09310.1.sm.mkhc	6343	6226	5064	1872	2827	1588	133.446	130.231	98.6736	37.2555	47.4363	31.4745	3.90588e-08	-1.46862	down
Zjn_sc00002.1.g09360.1.am.mk	391	487	284	64	55	51	4.2068	5.5617	2.75237	0.648111	0.502469	0.517372	6.23274e-07	-2.74523	down
Zjn_sc00002.1.g09400.1.sm.mkhc	559	663	809	1672	1344	1780	10.4498	13.1246	14.2965	29.7819	21.9827	32.0495	2.52351e-06	1.29874	up
Zjn_sc00002.1.g09440.1.am.mk	310	313	156	43	56	28	5.71801	6.07338	2.66603	0.731242	1.02799	0.474016	0.000122962	-2.61047	down
Zjn_sc00002.1.g09450.1.sm.mkhc	1946	1624	1632	6644	7227	6113	27.4253	24.4229	22.3168	90.4625	90.2946	83.8773	9.15472e-26	1.98007	up
Zjn_sc00002.1.g09550.1.am.mk	704	718	610	270	259	248	7.55065	8.15486	6.18363	2.75274	2.42341	2.55708	1.33356e-08	-1.34891	down
Zjn_sc00002.1.g09820.1.sm.mkhc	19215	16525	18418	46529	53343	44592	312.421	284.86	283.774	722.966	761.701	700.095	1.02404e-15	1.45628	up
Zjn_sc00002.1.g09910.1.sm.mkhc	121	143	168	291	399	299	2.56542	3.19338	3.35191	5.88185	7.40785	6.09578	1.12023e-05	1.23441	up
Zjn_sc00002.1.g09970.1.sm.mkhc	50	51	44	116	130	120	1.2913	1.40207	1.07778	2.87066	2.96794	2.99875	0.00077842	1.37189	up
Zjn_sc00002.1.g10050.1.sm.mk	409	430	405	187	231	183	4.181	4.6595	3.91603	1.81986	2.06461	1.79954	0.000148144	-1.01533	down
Zjn_sc00002.1.g10060.1.am.mk	391	251	249	1383	1370	1588	24.3993	16.5747	14.6895	82.3068	74.8627	95.5231	1.79842e-24	2.32983	up
Zjn_sc00002.1.g10070.1.sm.mk	69	50	80	330	243	303	4.13297	3.13566	4.50043	18.8916	12.7497	17.5614	5.30314e-12	2.20256	up
Zjn_sc00002.1.g10130.1.sm.mkhc	458	541	431	1069	964	816	5.03176	5.97102	4.48781	11.2149	9.28081	8.55986	2.49023e-06	1.02872	up
Zjn_sc00002.1.g10360.1.sm.mkhc	1145	1119	1639	2984	2534	2526	12.6198	12.3847	16.9642	30.4276	24.3827	26.1869	3.0846e-08	1.10095	up
Zjn_sc00002.1.g10530.1.am.mkhc	95	163	146	461	292	451	1.96644	3.57153	2.85332	9.10245	5.29246	8.9929	0.000181666	1.62973	up
Zjn_sc00002.1.g10550.1.am.mkhc	199	161	160	347	355	382	2.44803	2.08907	1.85226	4.05947	3.82185	4.52422	5.33579e-05	1.10393	up
Zjn_sc00002.1.g10570.1.am.mk	70	60	60	226	169	123	2.93532	2.67022	2.38378	9.08738	6.22866	5.00369	0.000628818	1.4868	up
Zjn_sc00002.1.g10750.1.am.mk	258	247	277	653	671	447	15.5225	15.6828	15.7563	37.415	35.3333	25.8634	4.17787e-07	1.21724	up
Zjn_sc00002.1.g10850.1.am.mk	1300	1586	954	389	544	234	34.2512	49.9798	24.5924	10.5045	14.1335	5.56176	0.000430203	-1.71184	down
Zjn_sc00002.1.g11050.1.am.mk	145	158	190	54	72	90	1.92313	2.21205	2.38603	0.681058	0.836332	1.15008	0.0016357	-1.13707	down
Zjn_sc00002.1.g11100.1.sm.mkhc	401	265	263	1309	796	1120	2.8392	1.98741	1.76089	8.86447	4.94888	7.66312	2.46891e-05	1.84874	up
Zjn_sc00002.1.g11120.1.sm.mkhc	1682	1669	1538	3110	3656	3431	34.9117	36.7739	30.2866	61.6243	66.4316	68.7995	1.11689e-08	1.0985	up
Zjn_sc00002.1.g11200.1.sm.mkhc	19	15	16	94	80	157	0.251245	0.205845	0.197447	1.21753	0.960212	2.06818	0.000236131	2.78873	up
Zjn_sc00002.1.g11350.1.sm.mk	39	13	14	131	161	96	0.605176	0.202527	0.194606	2.11605	2.46143	1.94548	2.91579e-09	2.58258	up
Zjn_sc00002.1.g11380.1.sm.mkhc	2079	1690	2159	5147	4270	4151	25.3211	21.5237	24.9498	59.3008	45.2078	48.5332	7.26156e-11	1.24614	up
Zjn_sc00002.1.g11580.1.am.mk	3429	3122	2927	657	556	591	45.9501	44.2694	36.9412	8.36776	6.48088	7.61044	4.61058e-32	-2.34922	down
Zjn_sc00002.1.g11620.1.sm.mk	132	180	96	349	329	290	6.20285	8.93728	4.27088	15.6551	13.5389	13.1593	5.44082e-06	1.26959	up
Zjn_sc00002.1.g11770.1.am.mk	1599	1757	2415	4008	4795	4509	13.1125	15.4471	20.87	29.8223	33.5979	36.4168	5.02425e-11	1.25737	up
Zjn_sc00002.1.g11970.1.am.mk	103	174	93	11	15	21	3.88922	6.99679	3.32531	0.394955	0.48806	0.753646	0.000115613	-2.94533	down
Zjn_sc00002.1.g12150.1.sm.mkhc	608	663	927	1470	1762	1343	11.9257	13.8047	17.1632	27.5287	30.0806	25.2873	9.83398e-08	1.10464	up
Zjn_sc00002.1.g12180.1.am.mk	1785	2196	2044	696	526	519	65.5897	85.4589	71.031	24.3597	16.9176	18.3139	1.10413e-16	-1.74677	down
Zjn_sc00002.1.g12220.1.sm.mkhc	3366	3780	3029	700	776	564	42.0102	49.0806	35.0773	8.3097	8.65441	6.72702	1.60559e-17	-2.28969	down
Zjn_sc00002.1.g12330.1.am.mk	0	0	18	48	42	43	0	0	0.462246	1.30284	1.03224	1.18032	0.000106713	3.02859	up
Zjn_sc00002.1.g12430.1.sm.mkhc	1118	903	1009	398	165	224	48.5198	41.4669	41.4024	16.432	6.24398	9.35917	2.8103e-15	-1.88542	down
Zjn_sc00002.1.g12480.1.sm.mkhc	194	300	335	691	575	824	4.58234	7.29192	7.2676	15.4564	11.8711	18.222	6.63132e-05	1.39274	up
Zjn_sc00002.1.g12600.1.sm.mkhc	5905	4592	6322	16666	12122	13243	155.186	127.657	156.787	420.272	280.624	337.165	8.20265e-07	1.37871	up
Zjn_sc00002.1.g12780.1.sm.mkhc	21	5	7	63	44	42	0.299521	0.061355	0.082454	0.855621	0.546889	0.579008	0.000916556	2.22165	up
Zjn_sc00002.1.g12820.1.am.mk	210	213	141	77	109	53	2.35618	2.52897	1.49958	0.824763	1.06962	0.565217	0.00287711	-1.22728	down
Zjn_sc00002.1.g12880.1.am.mkhc	1522	1513	1078	360	532	379	31.7768	33.4097	21.2512	7.14795	9.67117	7.58966	1.60911e-06	-1.67285	down
Zjn_sc00002.1.g12940.1.sm.mkhc	3622	3207	3492	8863	8413	8709	62.0335	58.4977	56.6219	144.309	126.118	143.048	1.30464e-13	1.37912	up
Zjn_sc00002.1.g13180.1.am.mk	293	489	484	194	160	138	7.76884	15.2619	13.4878	5.44174	3.69801	3.90543	0.000574154	-1.31999	down
Zjn_sc00002.1.g13310.1.sm.mkhc	17455	14761	17228	47091	52753	44732	401.908	358.55	371.245	1049.33	1082.8	1014.71	2.23732e-18	1.59072	up
Zjn_sc00002.1.g13660.1.am.mk	318	263	295	105	140	113	5.15872	4.51	4.51773	1.62202	1.99599	1.75344	2.46891e-05	-1.25258	down
Zjn_sc00002.1.g13730.1.am.mk	1585	1014	715	4	448	207	22.2155	15.0539	9.46821	0.044973	5.49549	2.79391	0.00314818	-2.34172	down
Zjn_sc00002.1.g13810.1.sm.mk	1808	1300	1370	5186	6097	5602	17.4585	13.444	13.082	48.2001	52.2543	52.6347	7.4285e-25	1.95514	up
Zjn_sc00002.1.g13830.1.sm.mkhc	480	424	536	1264	1148	1410	3.60435	3.36414	3.80617	9.04783	7.54637	10.1981	1.57021e-11	1.46439	up
Zjn_sc00002.1.g13950.1.am.mk	735	781	480	129	158	113	15.8115	17.783	9.75587	2.638	2.96271	2.33141	1.5343e-06	-2.29933	down
Zjn_sc00002.1.g13990.1.am.mk	7270	7490	7113	2936	3270	2439	74.6944	80.7042	70.2587	32.1828	24.0049	20.1085	4.17686e-12	-1.30498	down
Zjn_sc00002.1.g14000.1.am.mkhc	12228	11682	12998	3737	4666	3174	217.776	220.29	218.867	63.4283	72.7237	54.4354	1.24711e-18	-1.63714	down
Zjn_sc00002.1.g14080.1.sm.mkhc	119	128	144	349	219	327	1.99942	2.22718	2.47118	5.18681	3.03337	5.06169	0.00111727	1.25475	up
Zjn_sc00002.1.g14120.1.sm.mkhc	806	644	541	1968	1867	1890	18.0113	15.2165	11.4228	41.9056	36.5033	40.6729	9.05053e-15	1.56238	up
Zjn_sc00002.1.g14220.1.am.mk	36	28	24	111	57	122	0.982799	0.804625	0.612059	2.8941	1.35634	3.23457	0.00559701	1.77941	up
Zjn_sc00002.1.g14470.1.sm.mkhc	7065	7022	6728	1513	2017	808	211.85	222.921	190.728	43.2129	52.9254	23.3207	2.17424e-31	-2.24314	down
Zjn_sc00002.1.g14770.1.sm.mkhc	194	161	196	549	553	611	1.86475	1.63559	1.78171	5.04098	4.66411	5.66834	1.01128e-11	1.68765	up
Zjn_sc00002.1.g14880.1.sm.mkhc	1903	1985	1634	489	381	262	44.6649	50.4464	36.5661	11.0341	7.85753	5.91542	1.15507e-17	-2.25332	down
Zjn_sc00002.1.g14920.1.am.mk	64	68	52	9	15	7	0.866015	0.979047	0.664801	0.09341	0.159175	0.067496	5.51626e-05	-2.55732	down
Zjn_sc00002.1.g15070.1.sm.mk	367	301	266	111	74	45	6.33232	5.04938	4.25303	1.81258	1.05807	0.739576	4.80107e-09	-1.98686	down
Zjn_sc00002.1.g15120.1.am.mkhc	592	505	677	1289	1462	1414	12.9428	11.6615	13.8813	26.3002	27.9517	29.609	9.89072e-10	1.28161	up
Zjn_sc00002.1.g15370.1.sm.mkhc	203	211	156	34	45	22	6.9524	7.63245	5.03548	1.0785	1.34491	0.721447	4.57802e-11	-2.48102	down
Zjn_sc00002.1.g15400.1.sm.mkhc	1655	2076	1560	453	678	452	22.8809	30.4077	20.4036	5.95962	8.20839	5.99345	8.99832e-08	-1.71966	down
Zjn_sc00002.1.g15410.1.sm.mk	170	198	76	31	24	11	1.9797	2.38885	0.817968	0.328242	0.235447	0.111329	0.00166755	-2.74246	down
Zjn_sc00002.1.g15420.1.sm.mkhc	67	62	41	120	93	146	1.02106	0.990771	0.582202	1.73786	1.24332	2.1382	0.00618514	1.12237	up
Zjn_sc00002.1.g15450.1.sm.mkhc	10046	7074	4555	973	687	654	226.565	170.348	97.8426	20.7379	12.9901	13.6808	1.4073e-05	-3.19397	down
Zjn_sc00002.1.g15540.1.am.mk	480	502	384	125	129	58	9.18023	10.1639	6.94129	2.276	2.15773	1.05938	1.0035e-10	-2.11109	down
Zjn_sc00002.1.g15610.1.am.mkhc	225	264	216	89	121	124	2.66948	3.31677	2.42153	1.00659	1.25754	1.41161	0.00110094	-1.04211	down
Zjn_sc00002.1.g15810.1.am.mk	26072	27692	26587	5145	6451	4210	402.607	454.772	391.901	76.7957	87.5419	65.0959	2.32124e-35	-2.3156	down
Zjn_sc00002.1.g15870.1.am.mk	529	399	492	128	214	155	9.64738	7.71919	8.54846	2.2243	3.43368	2.71255	1.33371e-08	-1.47886	down
Zjn_sc00002.1.g15880.1.am.mkhc	1912	1677	1692	3362	3461	4024	17.3084	16.0762	14.4809	29.0086	27.4224	35.0817	1.97864e-08	1.08514	up
Zjn_sc00002.1.g16010.1.sm.mk	153	158	191	34	49	61	1.00399	1.10238	1.19423	0.204152	0.281497	0.38847	2.45762e-06	-1.7488	down
Zjn_sc00002.1.g16140.1.sm.mk	700	538	567	1553	1640	1227	6.5426	5.0274	4.64289	13.5935	13.0235	12.5195	1.149e-10	1.32912	up
Zjn_sc00002.1.g16170.1.am.mk	1039	1247	1222	101	221	98	28.7702	36.4237	31.997	2.64213	5.33585	2.56961	1.15467e-38	-3.04728	down
Zjn_sc00002.1.g16220.1.am.mk	177	175	135	22	13	37	4.00224	4.19017	2.90489	0.569165	0.23672	0.80713	2.14299e-11	-2.69566	down
Zjn_sc00002.1.g16430.1.sm.mkhc	666	866	863	188	322	147	10.359	14.7453	13.267	2.76318	4.45947	2.16527	5.82644e-12	-1.84617	down
Zjn_sc00002.1.g16490.1.am.mk	1155	1222	1246	290	424	168	32.3728	36.2662	33.0377	7.74902	10.3891	4.51271	6.9119e-20	-2.0186	down
Zjn_sc00002.1.g16820.1.sm.mk	138	193	150	35	50	15	5.82456	8.67411	6.02503	1.39879	1.83926	0.60054	3.82636e-08	-2.25858	down
Zjn_sc00002.1.g16910.1.sm.mkhc	372	269	253	706	1029	763	8.4073	6.44037	5.40289	15.2284	20.3997	16.6322	3.09381e-11	1.51207	up
Zjn_sc00002.1.g17000.1.sm.mkhc	614	729	643	1332	1422	1490	8.25577	10.4012	8.19175	17.1452	16.8125	19.3813	4.50368e-08	1.13614	up
Zjn_sc00002.1.g17040.1.sm.mk	351	347	350	124	42	71	11.7124	12.2627	11.0342	3.92347	1.20402	2.26807	6.52548e-13	-2.08293	down
Zjn_sc00002.1.g17080.1.sm.mkhc	583	595	438	1266	1284	1396	7.10325	7.41818	5.10059	14.6891	13.5565	16.0975	2.30533e-10	1.32428	up
Zjn_sc00002.1.g17170.1.am.mk	349	295	310	761	1213	751	27.9194	24.9849	23.4375	58.0171	84.9418	57.8237	8.48725e-07	1.54216	up
Zjn_sc00002.1.g17180.1.am.mk	1776	2779	2488	127	391	218	56.9631	94.4021	75.4593	3.85704	10.9758	6.70646	3.36689e-13	-3.24383	down
Zjn_sc00002.1.g17190.1.sm.mkhc	763	516	514	2092	3382	1988	21.6145	15.4731	13.7519	56.4876	83.868	54.2342	5.48123e-08	2.08131	up
Zjn_sc00002.1.g17330.1.am.mkhc	1091	1584	1765	2972	3181	3150	12.9022	21.0009	20.7881	37.0973	35.8962	39.5908	1.093e-08	1.11485	up
Zjn_sc00002.1.g17600.1.am.mk	162	113	148	311	310	362	3.65867	2.7156	3.1783	6.71056	6.15587	7.89587	8.02305e-06	1.27045	up
Zjn_sc00003.1.g00190.1.am.mk	477	607	439	199	229	143	10.8906	14.6774	9.47997	4.31296	4.56976	3.14128	3.56818e-05	-1.39333	down
Zjn_sc00003.1.g00230.1.sm.mk	167	220	145	24	38	30	11.8513	16.5164	9.68605	1.6147	2.35006	1.98722	8.35548e-08	-2.51073	down
Zjn_sc00003.1.g00440.1.am.mk	475	570	365	1869	1944	2589	8.80831	11.8632	6.56843	24.905	27.6196	36.8507	1.89484e-09	2.22005	up
Zjn_sc00003.1.g00580.1.sm.mk	155	207	161	26	55	16	3.54705	5.03126	3.47789	0.558358	1.08606	0.349868	1.4763e-09	-2.43123	down
Zjn_sc00003.1.g00610.1.sm.mkhc	275	291	307	131	107	94	3.09101	3.46217	3.26443	1.40219	1.04598	1.01764	5.46169e-06	-1.35006	down
Zjn_sc00003.1.g00980.1.sm.mkhc	178	196	124	385	353	290	2.34201	2.65382	1.59088	4.65126	3.9444	3.56725	8.57163e-05	1.0725	up
Zjn_sc00003.1.g01060.1.am.mkhc	10899	8529	9423	31188	31321	32811	130.969	109.956	107.792	361.535	332.016	383.158	4.37852e-22	1.77085	up
Zjn_sc00003.1.g01160.1.am.mk	610	605	391	148	210	45	8.05606	8.45412	4.87127	1.85772	2.41715	0.5654	6.43811e-05	-1.99682	down
Zjn_sc00003.1.g01180.1.am.mkhc	63	34	46	120	94	156	0.695325	0.562262	0.534788	1.28784	0.945301	1.52493	0.0022786	1.43449	up
Zjn_sc00003.1.g01290.1.am.mkhc	2365	1813	2349	4240	4772	4890	28.3702	23.035	26.6476	48.4958	50.1164	56.5126	2.45355e-09	1.14081	up
Zjn_sc00003.1.g01295.1.br	2487	3234	1868	439	428	101	86.9908	119.801	61.7875	14.6	13.067	3.39182	6.43567e-07	-2.96664	down
Zjn_sc00003.1.g01360.1.sm.mk	14	11	18	177	297	174	0.402094	0.331407	0.473571	4.92179	7.57534	4.88008	7.09239e-15	3.95345	up
Zjn_sc00003.1.g01450.1.sm.mkhc	683	687	467	121	134	40	6.58661	7.01745	4.25884	1.10779	1.13096	0.368827	5.10807e-09	-2.6299	down
Zjn_sc00003.1.g01480.1.sm.mkhc	101	116	50	8	26	14	0.542962	0.804212	0.262361	0.036706	0.115217	0.065161	0.0016122	-2.48287	down
Zjn_sc00003.1.g01710.1.sm.mkhc	6138	4519	4962	15293	13097	15229	117.159	91.319	89.5507	278.194	218.774	279.922	1.25959e-13	1.53161	up
Zjn_sc00003.1.g01950.1.sm.mk	4693	7391	5645	12000	11037	12504	31.9196	53.2234	36.2989	77.7849	65.6952	81.8978	3.49728e-06	1.04281	up
Zjn_sc00003.1.g02090.1.sm.mkhc	459	576	662	188	261	191	9.64784	12.8182	13.1986	3.7804	4.897	4.19402	3.28069e-08	-1.36859	down
Zjn_sc00003.1.g02120.1.sm.mkhc	45	51	53	209	193	169	1.33521	1.60164	1.48474	5.92645	5.02044	4.85638	2.3628e-08	1.98126	up
Zjn_sc00003.1.g02350.1.sm.mkhc	386	301	415	117	190	50	6.54215	5.38758	6.64379	1.88391	2.81808	0.80538	6.13795e-08	-1.60691	down
Zjn_sc00003.1.g02370.1.sm.mkhc	25	48	51	204	197	143	0.529079	1.08223	1.02875	4.16197	3.70554	2.96023	3.07759e-09	2.17444	up
Zjn_sc00003.1.g02430.1.sm.mkhc	689	691	789	1344	1670	1691	7.93056	8.41321	8.58108	14.7363	16.8165	18.743	1.67853e-08	1.16341	up
Zjn_sc00003.1.g02540.1.am.mk	106	99	71	48	18	40	2.15237	2.10886	1.3475	0.924037	0.319137	0.773111	0.00455942	-1.32478	down
Zjn_sc00003.1.g03010.1.sm.mkhc	158	169	168	394	310	470	0.849691	0.960555	0.854338	2.02043	1.45892	2.43821	0.000250472	1.30095	up
Zjn_sc00003.1.g03080.1.am.mk	918	427	723	223	171	151	9.96456	4.91186	7.41848	2.30819	1.61859	1.57367	0.000445734	-1.86913	down
Zjn_sc00003.1.g03180.1.sm.mkhc	4659	3908	5150	9760	10805	13043	83.0026	74.3251	85.7066	163.378	160.464	221.584	1.21235e-07	1.3482	up
Zjn_sc00003.1.g03260.1.sm.mk	52	79	64	172	195	114	2.63917	4.28027	3.07892	8.38306	8.72974	5.61647	0.000234574	1.32715	up
Zjn_sc00003.1.g03330.1.am.mk	165	113	120	55	26	27	3.02714	2.18138	2.06749	0.950854	0.407573	0.469394	8.46092e-06	-1.82983	down
Zjn_sc00003.1.g03420.1.sm.mkhc	138	92	99	339	249	384	0.866267	0.611842	0.583296	2.02825	1.36728	2.32157	5.17019e-05	1.61918	up
Zjn_sc00003.1.g03630.1.am.mkhc	1655	1645	1651	754	703	641	13.56	14.9826	13.5534	5.95881	5.67336	5.0602	5.73752e-09	-1.19645	down
Zjn_sc00003.1.g03670.1.sm.mk	2652	2673	1875	1130	1246	507	85.0721	90.7813	56.861	34.5469	34.9649	15.6354	0.00105009	-1.3064	down
Zjn_sc00003.1.g03700.1.sm.mk	391	379	234	155	162	129	6.37135	6.5359	3.60339	2.40579	2.30316	2.02636	0.00647488	-1.14642	down
Zjn_sc00003.1.g03790.1.sm.mkhc	1104	1753	1253	4718	6379	5182	12.6702	22.0375	14.4391	53.5594	69.1161	62.4495	2.14292e-26	2.01153	up
Zjn_sc00003.1.g03940.1.sm.mkhc	112	88	101	177	202	233	1.42077	1.11088	1.15375	2.02802	2.13872	2.71944	0.00122062	1.07299	up
Zjn_sc00003.1.g04010.1.am.mk	1001	875	892	2567	3651	2493	14.3175	13.2606	12.0612	35.0123	45.7345	34.3692	3.99793e-14	1.6849	up
Zjn_sc00003.1.g04190.1.sm.mkhc	666	650	475	321	200	258	5.79893	5.80038	4.0143	2.7906	1.4437	2.24745	0.000617132	-1.15739	down
Zjn_sc00003.1.g04380.1.sm.mkhc	4381	3744	5075	9956	8986	14559	28.1898	24.8712	31.4279	61.8245	51.1667	90.1693	0.00194891	1.40864	up
Zjn_sc00003.1.g04560.1.am.mk	218	296	263	481	638	433	5.93536	8.32869	6.26829	13.2965	16.1278	11.754	2.7654e-05	1.02666	up
Zjn_sc00003.1.g04600.1.am.mkhc	3155	3705	2495	601	665	477	83.8854	104.537	61.9802	14.014	14.2495	10.9165	4.36415e-09	-2.40076	down
Zjn_sc00003.1.g04710.1.am.mk	106	48	71	212	371	217	3.99483	1.88731	2.5206	7.62129	12.2721	7.89396	2.16715e-05	1.86164	up
Zjn_sc00003.1.g04960.1.am.mkhc	7643	6264	7206	15903	13134	15418	55.7058	49.6064	50.1601	112.106	86.9798	110.35	1.43679e-08	1.12661	up
Zjn_sc00003.1.g05070.1.sm.mkhc	5082	4059	5866	8270	12552	9972	98.9024	83.6436	107.945	153.394	213.8	186.908	4.91454e-07	1.08159	up
Zjn_sc00003.1.g05200.1.am.mk	655	606	482	244	390	196	3.41299	3.33093	2.1389	1.27827	1.76685	1.03323	0.00117169	-1.05515	down
Zjn_sc00003.1.g05230.1.sm.mkhc	1139	1067	889	416	452	297	18.0624	17.9084	13.3186	6.27467	6.2658	4.53356	2.13528e-08	-1.38189	down
Zjn_sc00003.1.g05360.1.sm.mkhc	332	302	330	1496	1383	1482	5.73759	5.50406	5.41092	23.0188	21.0123	23.2194	3.01251e-25	2.22583	up
Zjn_sc00003.1.g05370.1.sm.mkhc	3851	3365	3354	8646	7774	8678	39.2567	36.7616	32.5911	81.6075	68.0705	83.8113	3.911e-12	1.29404	up
Zjn_sc00003.1.g05450.1.sm.mk	222	328	184	919	770	1001	3.33907	5.10205	2.52132	12.8725	9.88128	14.2481	6.08994e-10	1.90782	up
Zjn_sc00003.1.g05480.1.sm.mkhc	9295	9004	9750	4305	4764	3101	155.136	159.123	153.852	68.4768	69.5773	49.8314	4.30412e-10	-1.16926	down
Zjn_sc00003.1.g05600.1.sm.mk	434	380	393	188	258	134	8.80594	8.28771	7.09114	3.5298	4.65341	2.66073	0.000151819	-1.03154	down
Zjn_sc00003.1.g05610.1.sm.mkhc	8159	6718	7787	17094	17597	17672	128.188	110.274	114.208	253.24	235.929	262.452	9.25877e-12	1.25535	up
Zjn_sc00003.1.g05620.1.am.mkhc	181	176	211	487	431	282	3.03169	3.11689	3.35022	7.79624	6.33069	4.55523	0.000668455	1.12099	up
Zjn_sc00003.1.g05850.1.sm.mkhc	94	143	109	306	310	337	2.06325	3.31311	2.24434	6.39447	5.95452	7.11306	1.6747e-07	1.49929	up
Zjn_sc00003.1.g05900.1.sm.mk	920	1032	943	195	158	142	19.5852	23.2682	18.9967	3.95089	2.94129	2.89544	6.63773e-27	-2.50721	down
Zjn_sc00003.1.g06140.1.sm.mkhc	2481	2996	2822	979	1076	855	39.718	50.5939	41.9361	14.608	14.7429	12.7205	6.98108e-14	-1.47594	down
Zjn_sc00003.1.g06190.1.am.mkhc	1220	1310	1330	641	582	522	15.6674	17.8264	16.1376	7.83923	6.52131	6.43908	1.95163e-07	-1.10256	down
Zjn_sc00003.1.g06580.1.sm.mkhc	142	148	91	723	505	403	1.87826	2.00781	1.10336	9.00979	5.92423	5.02609	1.9094e-05	2.12684	up
Zjn_sc00003.1.g06600.1.am.mkhc	838	561	236	56	79	46	13.6308	9.89516	3.61279	0.898165	1.1264	0.827048	0.0037163	-3.1684	down
Zjn_sc00003.1.g06660.1.am.mk	301	470	413	696	880	971	3.42489	5.55989	5.07561	7.28328	8.4965	11.4242	3.3807e-05	1.14609	up
Zjn_sc00003.1.g06890.1.sm.mkhc	6228	5754	6339	10272	13933	11652	124.916	122.134	120.255	196.42	244.67	225.153	5.17744e-08	1.0078	up
Zjn_sc00003.1.g06950.1.am.mk	225	191	280	60	86	47	4.1356	3.72739	4.87531	1.05097	1.38244	0.831476	4.6192e-08	-1.8132	down
Zjn_sc00003.1.g07070.1.sm.mkhc	2168	2258	1529	820	973	739	31.6539	35.3255	21.2408	11.1829	11.9817	11.1075	0.000431575	-1.20979	down
Zjn_sc00003.1.g07220.1.am.mkhc	70	108	81	14	44	14	1.50271	2.46661	1.6621	0.273036	0.833057	0.286058	0.000403765	-1.85279	down
Zjn_sc00003.1.g07230.1.am.mkhc	32426	28929	37345	7488	7630	9272	495.686	449.547	515.995	97.3524	90.7119	120.671	6.83408e-27	-1.96096	down
Zjn_sc00003.1.g07260.1.sm.mkhc	6925	5749	4982	2134	3261	1957	112.711	95.8584	73.3895	33.4809	44.3689	29.7167	2.23565e-05	-1.24188	down
Zjn_sc00003.1.g07410.1.sm.mkhc	2155	2269	1507	933	1015	512	39.9166	44.8323	26.5939	16.5251	15.7797	8.90431	0.00167481	-1.25323	down
Zjn_sc00003.1.g07560.1.am.mk	417	486	542	255	288	159	3.74564	4.62551	4.60487	2.18573	2.26773	1.37409	9.20614e-05	-1.00799	down
Zjn_sc00003.1.g07630.1.am.mk	234	154	48	0	0	0	5.43329	3.79536	1.04152	0	0	0	1.92745e-06	#NAME?	down
Zjn_sc00003.1.g07680.1.sm.mkhc	58	55	48	462	391	626	2.18978	2.17275	1.7037	16.6573	12.957	22.8244	1.25738e-09	3.25109	up
Zjn_sc00003.1.g07710.1.sm.mkhc	854	913	904	351	427	359	20.8119	23.5697	20.8461	8.14427	9.10646	8.42937	1.11089e-07	-1.19471	down
Zjn_sc00003.1.g07770.1.am.mk	4189	5226	6039	12039	13319	9595	62.8649	81.5768	85.4942	168.806	173.935	137.759	3.86914e-11	1.21821	up
Zjn_sc00003.1.g07820.1.sm.mkhc	2106	1490	2307	4542	5472	5632	36.8787	26.9574	38.4098	75.126	83.4518	92.8934	1.60091e-14	1.46098	up
Zjn_sc00003.1.g07920.1.am.mkhc	938	956	844	347	442	325	23.1743	24.9728	19.648	8.11788	9.52614	7.70046	1.88938e-08	-1.26733	down
Zjn_sc00003.1.g08420.1.sm.mkhc	99	101	83	44	45	28	2.51139	2.7173	2.00095	1.05369	0.990905	0.685304	0.00820756	-1.24708	down
Zjn_sc00003.1.g08640.1.am.mk	3631	3641	3009	810	1400	813	37.0518	40.9007	28.5797	7.66931	12.4266	7.81869	1.42888e-11	-1.74722	down
Zjn_sc00003.1.g08650.1.sm.mkhc	136	125	204	65	70	79	3.91258	3.79309	5.53311	1.76771	1.75071	2.18206	0.00395062	-1.05786	down
Zjn_sc00003.1.g08720.1.sm.mkhc	105	173	113	33	20	11	1.11743	1.95565	1.12449	0.310833	0.101702	0.09389	1.98202e-05	-2.58436	down
Zjn_sc00003.1.g08780.1.sm.mk	92	89	67	37	20	11	0.905229	0.920467	0.618544	0.341074	0.165924	0.100268	0.000359811	-1.83401	down
Zjn_sc00003.1.g08870.1.am.mkhc	4193	3682	5789	10847	7718	11649	25.4168	23.6126	33.0291	62.2045	40.3946	67.1458	0.000944191	1.21455	up
Zjn_sc00003.1.g08960.1.sm.mkhc	71	138	106	583	538	711	0.850648	1.75307	1.2054	6.68221	5.66294	8.23822	3.54814e-14	2.58338	up
Zjn_sc00003.1.g08990.1.sm.mk	87	103	89	456	444	566	0.914056	1.16247	0.955218	5.34805	4.21106	6.70296	1.11224e-15	2.43896	up
Zjn_sc00003.1.g09080.1.am.mk	160	116	127	286	387	263	3.60559	2.75398	2.69572	6.14752	7.6506	5.71891	1.14332e-05	1.24848	up
Zjn_sc00003.1.g09150.1.am.mk	21	16	20	58	89	58	0.451023	0.358008	0.408398	1.18709	1.68226	1.19185	0.000689236	1.8811	up
Zjn_sc00003.1.g09190.1.sm.mkhc	53	42	37	95	121	120	1.28365	1.07236	0.828562	2.19892	2.56909	2.7964	0.00111059	1.38469	up
Zjn_sc00003.1.g09240.1.am.mk	126	116	81	352	408	373	3.49047	3.39263	2.11195	9.34437	9.941	9.98006	2.61085e-11	1.84003	up
Zjn_sc00003.1.g09650.1.sm.mkhc	6845	6276	6172	2072	2761	2226	84.6542	82.113	72.7477	24.3943	29.8567	26.4693	6.40629e-14	-1.4158	down
Zjn_sc00003.1.g09740.1.am.mkhc	220	174	173	786	680	755	3.75037	3.1408	2.78023	12.7694	10.1437	12.3803	1.98504e-17	2.016	up
Zjn_sc00003.1.g09840.1.sm.mkhc	1278	1242	883	293	290	151	18.722	19.4528	12.2651	4.03305	3.63572	2.11447	2.27873e-08	-2.19261	down
Zjn_sc00003.1.g09920.1.am.mk	1021	839	804	335	265	371	45.7324	39.768	34.0611	14.2975	10.3567	15.9729	2.14128e-09	-1.40488	down
Zjn_sc00003.1.g10150.1.sm.mkhc	1887	1525	1625	3352	2791	3797	13.3577	11.3985	10.8245	22.6006	17.2455	25.9281	0.000167557	1.03396	up
Zjn_sc00003.1.g10420.1.sm.mk	3284	2585	3764	1218	1411	1779	81.8577	68.2424	88.7073	28.9191	30.7827	42.6962	2.05603e-07	-1.06882	down
Zjn_sc00003.1.g10550.1.sm.mkhc	410	457	395	1048	797	1057	4.70105	6.68384	5.3083	13.0999	8.02607	14.7802	9.00296e-06	1.24923	up
Zjn_sc00003.1.g10580.1.sm.mk	268	348	162	20	16	38	3.50479	4.81355	1.98316	0.24879	0.160453	0.470613	1.71297e-05	-3.34999	down
Zjn_sc00003.1.g10610.1.sm.mkhc	17364	16086	22254	39808	43226	34698	390.54	383.191	473.495	853.643	851.391	752.024	7.99808e-10	1.12763	up
Zjn_sc00003.1.g10720.1.am.mk	327	257	300	1067	1162	936	5.76275	4.78641	4.99257	17.9533	17.9481	15.8926	1.42981e-17	1.88162	up
Zjn_sc00003.1.g10770.1.am.mk	235	217	160	53	101	28	5.57275	5.44836	3.58689	1.19235	2.08629	0.629061	6.21876e-05	-1.75081	down
Zjn_sc00003.1.g10860.1.sm.mkhc	1669	1943	1541	418	457	350	28.7457	35.3091	23.8411	6.50351	6.55659	5.64013	5.6981e-14	-2.04288	down
Zjn_sc00003.1.g10890.1.sm.mkhc	330	312	307	67	82	46	6.97675	6.97125	6.13229	1.33688	1.50321	0.929989	2.0904e-13	-2.25515	down
Zjn_sc00003.1.g11190.1.am.mkhc	226	163	189	66	129	82	2.12292	1.61744	1.67596	0.585183	1.05574	0.740871	0.0029098	-1.03271	down
Zjn_sc00003.1.g11200.1.am.mkhc	11602	11503	11757	6015	6370	4116	249.407	261.883	238.757	123.105	119.806	84.994	2.56629e-08	-1.04504	down
Zjn_sc00003.1.g11290.1.am.mk	14	9	19	43	58	39	0.141053	0.086519	0.177277	0.436885	0.550997	0.389793	0.00818394	1.78952	up
Zjn_sc00003.1.g11310.1.am.mk	173	176	117	386	469	231	2.76371	2.98194	1.76578	5.88055	6.55957	3.55544	0.00246809	1.23481	up
Zjn_sc00003.1.g11540.1.am.mk	2120	1380	1674	535	955	393	25.0741	17.2748	18.7195	6.02173	9.87969	4.47394	7.02453e-05	-1.438	down
Zjn_sc00003.1.g11820.1.sm.mk	33	19	31	75	92	100	1.28549	0.774524	1.1361	2.79969	3.14764	3.74451	0.000349296	1.74154	up
Zjn_sc00003.1.g11910.1.am.mkhc	14577	13401	14048	6366	7729	5189	128.686	126.848	115.548	52.1776	58.3091	42.674	5.25977e-09	-1.09033	down
Zjn_sc00003.1.g11920.1.sm.mkhc	384	306	409	121	142	139	5.04967	4.25413	5.05326	1.49311	1.65134	1.75124	3.96164e-07	-1.40117	down
Zjn_sc00003.1.g12210.1.sm.mk	171	290	361	56	102	63	8.62228	15.5187	17.2379	2.65506	4.49589	3.02938	0.000245517	-1.86	down
Zjn_sc00003.1.g12310.1.sm.mk	1619	1366	1547	4498	4241	3054	43.0428	37.6671	39.2497	114.043	96.0393	77.57	2.46593e-09	1.42004	up
Zjn_sc00003.1.g12500.1.sm.mkhc	4384	3350	3010	803	523	731	46.6883	37.8369	30.3066	8.14835	4.86111	7.39793	8.06928e-11	-2.33458	down
Zjn_sc00003.1.g12570.1.am.mk	6394	5557	7887	2171	3617	1416	150.887	138.165	174.756	48.5115	74.3472	31.8994	2.10978e-08	-1.43421	down
Zjn_sc00003.1.g12760.1.sm.mkhc	1646	773	1141	2988	3003	3309	7.44036	3.95193	4.96059	13.0729	12.2271	14.7052	6.88021e-10	1.43843	up
Zjn_sc00003.1.g12810.1.sm.mkhc	97	12	104	536	454	707	1.04951	0.129947	1.06568	5.55872	4.3275	7.41002	3.83002e-09	3.08655	up
Zjn_sc00003.1.g12820.1.sm.mk	130	223	254	373	358	446	1.49671	2.71963	2.76378	4.09624	3.61273	4.95051	0.000573016	1.01088	up
Zjn_sc00003.1.g12900.1.sm.mkhc	179	130	174	312	372	421	1.89945	1.45813	1.80636	3.18784	3.48623	4.24552	5.56985e-06	1.24669	up
Zjn_sc00003.1.g12990.1.sm.mkhc	3344	3449	3498	1284	2622	1021	18.6822	20.4012	18.475	6.83486	12.8191	5.48828	0.000459999	-1.04896	down
Zjn_sc00003.1.g13000.1.sm.mk	372	307	316	145	156	147	9.79676	8.54772	7.84828	3.61715	3.57856	3.71627	9.10893e-05	-1.10954	down
Zjn_sc00003.1.g13160.1.am.mk	888	992	1020	481	383	439	15.8198	18.7756	17.2211	8.17957	5.96582	7.50263	4.90515e-07	-1.10432	down
Zjn_sc00003.1.g13280.1.sm.mkhc	235	228	187	71	106	82	3.34015	3.45816	2.503	0.967631	1.31254	1.10291	9.18955e-05	-1.30023	down
Zjn_sc00003.1.g13690.1.am.mk	14212	15372	13139	3612	3534	2650	181.443	214.198	164.72	46.371	40.9007	34.0831	1.46206e-22	-2.09194	down
Zjn_sc00003.1.g13740.1.sm.mk	241	377	208	67	114	47	9.94664	16.5368	8.12284	2.64252	4.10867	1.848	0.00343357	-1.85753	down
Zjn_sc00003.1.g13980.1.sm.mkhc	272	235	245	1044	932	945	6.55978	5.99818	5.56972	24.0084	19.6792	21.9466	5.88882e-19	2.00333	up
Zjn_sc00003.1.g14160.1.sm.mk	101	117	129	204	269	221	9.30115	11.4769	11.2283	17.9327	21.7984	19.7005	0.000943747	1.03988	up
Zjn_sc00003.1.g14200.1.sm.mkhc	114	122	143	420	365	366	2.38838	2.70871	2.83429	8.41597	6.70774	7.41442	1.80485e-09	1.65302	up
Zjn_sc00003.1.g14320.1.sm.mkhc	133	94	85	311	285	331	2.31397	1.72299	1.37888	5.13565	4.34785	5.54215	3.13704e-08	1.61479	up
Zjn_sc00003.1.g14460.1.sm.mkhc	84	112	123	2	2	11	3.12871	4.3955	4.33167	0.038453	0.040859	0.386853	2.10036e-14	-4.32157	down
Zjn_sc00003.1.g14560.1.sm.mkhc	420	675	541	38	33	46	6.11684	10.0794	7.15819	0.472807	0.407123	0.637909	3.80967e-13	-3.75928	down
Zjn_sc00003.1.g14660.1.sm.mk	190	206	150	44	74	36	5.18769	5.97395	3.85969	1.13549	1.75452	0.943475	7.84984e-07	-1.81455	down
Zjn_sc00003.1.g14800.1.sm.mk	80	82	97	23	46	25	5.18	5.66036	5.98523	1.42871	2.61501	1.52275	0.00384547	-1.43559	down
Zjn_sc00003.1.g14950.1.am.mk	99	83	129	174	248	263	1.11268	0.992157	1.37629	1.87078	2.45009	2.85941	0.000197655	1.19482	up
Zjn_sc00003.1.g15090.1.am.mk	308	404	266	73	45	65	3.98478	5.32223	2.96029	0.819329	0.464678	0.852525	2.00832e-07	-2.37494	down
Zjn_sc00004.1.g00090.1.am.mk	174	191	92	17	37	28	2.26767	2.63567	1.12597	0.201482	0.41897	0.341288	0.000320299	-2.46938	down
Zjn_sc00004.1.g00240.1.sm.mkhc	534	422	437	1563	1547	1616	6.24627	5.22971	4.8317	17.4478	15.8567	18.2217	3.84532e-18	1.80728	up
Zjn_sc00004.1.g00460.1.am.mk	768	722	569	177	380	210	14.1765	14.0345	10.2676	2.88637	5.75932	3.41982	2.75004e-05	-1.41127	down
Zjn_sc00004.1.g00470.1.sm.mkhc	232	159	220	110	60	66	3.34935	2.40477	2.98156	1.48528	0.766031	0.927829	8.02059e-05	-1.31299	down
Zjn_sc00004.1.g00540.1.sm.mkhc	57	30	52	393	485	249	0.917214	0.506474	0.772525	6.13949	6.91114	3.90217	8.48866e-11	3.05898	up
Zjn_sc00004.1.g00620.1.sm.mkhc	109	119	89	414	392	376	3.01159	3.47297	2.32904	10.9536	9.52105	10.0295	2.0294e-12	1.93319	up
Zjn_sc00004.1.g00920.1.am.mkhc	201	251	257	55	63	26	2.46561	3.2517	2.93477	0.589346	0.623539	0.321465	2.54225e-11	-2.27421	down
Zjn_sc00004.1.g01050.1.sm.mkhc	74	45	43	173	176	204	5.80767	3.6757	3.18579	12.9016	12.0962	15.4264	3.19337e-07	1.81521	up
Zjn_sc00004.1.g01055.1.br	412	235	430	783	929	913	10.6636	6.42436	10.5292	19.1913	21.0657	22.5836	2.8298e-09	1.34242	up
Zjn_sc00004.1.g01230.1.am.mk	4166	4681	2845	389	490	313	115.526	137.603	74.5668	10.2987	11.612	8.34593	9.26362e-10	-3.2776	down
Zjn_sc00004.1.g01390.1.am.mkhc	2633	1990	3014	5039	4608	6124	31.0058	24.2027	33.4928	55.0353	46.3852	66.7629	6.50158e-05	1.10906	up
Zjn_sc00004.1.g01520.1.am.mk	61	92	52	26	15	15	1.01273	1.62814	0.812904	0.403862	0.21817	0.232511	0.00211793	-1.83998	down
Zjn_sc00004.1.g01530.1.am.mk	239	239	283	494	516	573	7.23494	7.64206	8.08424	14.2471	13.6904	16.7237	8.66586e-06	1.10785	up
Zjn_sc00004.1.g01670.1.sm.mkhc	2757	2632	1929	839	781	713	67.4079	68.5467	44.1676	19.2006	16.8696	16.3996	9.05114e-07	-1.6163	down
Zjn_sc00004.1.g01860.1.am.mk	225	151	233	331	436	473	1.80847	1.31892	1.76582	2.52568	3.06673	3.68837	6.52435e-05	1.08066	up
Zjn_sc00004.1.g02260.1.sm.mkhc	71	61	54	19	24	16	1.38131	1.20431	1.03859	0.322034	0.440344	0.297573	0.00562437	-1.62891	down
Zjn_sc00004.1.g02270.1.sm.mk	387	611	356	133	239	87	7.94223	13.1518	6.77473	2.57868	4.03339	1.69353	0.00998637	-1.56291	down
Zjn_sc00004.1.g02510.1.am.mk	226	227	151	37	81	37	2.99697	3.14227	1.92014	0.39677	0.864896	0.382482	1.32427e-05	-1.95846	down
Zjn_sc00004.1.g02910.1.am.mk	5477	4304	5346	2507	2129	1698	82.7152	69.7626	77.0846	37.1792	28.5959	24.7296	1.57438e-10	-1.20975	down
Zjn_sc00004.1.g02930.1.am.mkhc	1883	2018	1757	798	955	750	32.0019	36.0242	28.0654	13.3181	14.0318	12.1812	2.20187e-08	-1.14466	down
Zjn_sc00004.1.g03470.1.sm.mkhc	9386	12881	9901	4837	6508	3496	234.3	335.877	233.74	114.5	140.507	85.2963	0.00131546	-1.09748	down
Zjn_sc00004.1.g03480.1.am.mk	296	370	298	104	169	79	4.06658	5.38817	3.87412	1.35208	2.03168	1.04713	4.40312e-06	-1.43927	down
Zjn_sc00004.1.g03970.1.sm.mkhc	129	124	163	90	49	60	0.693671	0.743734	0.900594	0.496483	0.230708	0.306964	0.00896159	-1.00198	down
Zjn_sc00004.1.g03990.1.am.mkhc	657	893	944	256	385	205	14.6147	21.3534	19.9625	5.42788	7.61266	4.23604	4.71194e-08	-1.53243	down
Zjn_sc00004.1.g04080.1.am.mk	210	168	187	462	486	524	3.25564	2.757	2.73675	6.83721	6.61445	7.84273	1.90877e-08	1.42878	up
Zjn_sc00004.1.g04100.1.am.mk	68	37	66	150	124	112	2.88914	1.65258	2.61273	6.04962	4.58892	4.55303	0.0022619	1.23211	up
Zjn_sc00004.1.g04150.1.sm.mk	279	310	234	90	142	89	12.4072	14.5887	9.85888	3.78855	5.51105	3.78603	1.3768e-05	-1.33917	down
Zjn_sc00004.1.g04190.1.sm.mkhc	267	190	195	1173	1092	1198	6.30263	4.75645	4.35415	26.432	22.5819	27.2743	6.80373e-28	2.45492	up
Zjn_sc00004.1.g04290.1.am.mk	94	136	123	45	65	37	2.4211	3.71689	3.0007	1.09843	1.47295	0.902353	0.00375109	-1.23969	down
Zjn_sc00004.1.g04320.1.sm.mkhc	189	407	370	785	677	567	2.21906	5.13638	4.13851	8.87107	7.0627	6.50069	0.000308072	1.11061	up
Zjn_sc00004.1.g04350.1.sm.mkhc	189	215	337	91	105	89	6.18725	7.4489	10.4439	2.82848	2.99231	2.79854	0.000183729	-1.3242	down
Zjn_sc00004.1.g04470.1.am.mk	348	270	214	94	125	97	12.8647	10.5373	7.47171	3.28827	4.04029	3.4381	0.000338134	-1.36934	down
Zjn_sc00004.1.g04660.1.am.mk	854	1300	828	173	256	225	8.32858	13.4386	7.68043	1.59703	2.18094	2.12743	3.24478e-05	-2.16557	down
Zjn_sc00004.1.g04750.1.am.mk	212	224	165	95	87	46	19.3951	21.7194	14.2917	8.28732	6.96687	3.99006	6.41099e-05	-1.37545	down
Zjn_sc00004.1.g04760.1.am.mkhc	814	916	650	294	261	213	16.6711	19.8599	12.5876	5.7382	4.66798	4.20211	1.41083e-06	-1.60151	down
Zjn_sc00004.1.g04830.1.sm.mkhc	552	717	449	141	112	135	5.38586	7.06268	4.33775	1.44002	0.937768	1.263	6.03311e-06	-2.11058	down
Zjn_sc00004.1.g04900.1.am.mkhc	279	288	243	56	82	59	14.805	16.1994	12.2132	2.81164	3.78956	3.00507	2.6362e-10	-2.01314	down
Zjn_sc00004.1.g05080.1.sm.mkhc	1653	1306	1616	3019	3224	3325	22.0506	17.2651	20.5658	35.7487	36.241	39.8582	1.12074e-08	1.11379	up
Zjn_sc00004.1.g05150.1.sm.mkhc	926	1322	1460	373	413	446	8.91618	13.4878	13.2859	3.42706	3.47737	4.17195	2.03479e-07	-1.54049	down
Zjn_sc00004.1.g05255.1.br	2257	1394	1792	456	1071	334	67.1803	43.9351	50.4146	12.9218	27.891	9.56669	0.000491068	-1.53667	down
Zjn_sc00004.1.g05260.1.am.mk	258	223	255	86	139	81	8.10218	7.41204	7.58318	2.56341	3.80873	2.4517	9.81854e-05	-1.2371	down
Zjn_sc00004.1.g05370.1.sm.mkhc	422	379	213	870	1234	671	10.8718	10.3622	5.19473	21.4107	27.8787	16.6658	0.000121801	1.46226	up
Zjn_sc00004.1.g05380.1.sm.mkhc	4811	5034	4889	1564	1855	1079	99.978	110.981	97.7123	31.0745	33.9625	22.2083	1.78232e-18	-1.6829	down
Zjn_sc00004.1.g05550.1.am.mk	644	718	619	233	376	88	17.6752	20.9148	16.0786	6.06086	9.04876	2.3167	1.69395e-05	-1.50267	down
Zjn_sc00004.1.g05590.1.sm.mk	61	46	52	153	127	161	3.3732	2.71179	2.69765	8.08142	6.17618	8.61986	7.0578e-05	1.52489	up
Zjn_sc00004.1.g05650.1.am.mk	2074	2169	1790	693	870	715	55.629	61.5834	45.3894	17.6838	20.4063	18.4396	8.75724e-11	-1.37423	down
Zjn_sc00004.1.g05670.1.sm.mkhc	3005	2611	2250	591	499	434	33.3614	30.6498	23.6031	6.2541	4.827	4.63941	4.10997e-16	-2.33038	down
Zjn_sc00004.1.g05740.1.am.mk	1124	1288	1187	2431	2557	2264	19.5378	23.7605	20.146	41.5119	40.1385	39.0817	1.00914e-07	1.04885	up
Zjn_sc00004.1.g06030.1.am.mk	302	316	250	81	132	99	3.40969	3.77138	2.66477	0.865869	1.29869	1.07619	1.62738e-06	-1.45154	down
Zjn_sc00004.1.g06180.1.sm.mkhc	4964	5074	5874	15034	13445	15227	67.2539	72.7513	75.2459	194.176	159.47	198.706	3.17143e-16	1.50995	up
Zjn_sc00004.1.g06420.1.sm.mkhc	348	429	207	4	3	0	9.6797	12.6309	5.42229	0.101959	0.048871	0	6.26089e-13	-7.13814	down
Zjn_sc00004.1.g06540.1.am.mk	79	71	92	352	461	324	1.72139	1.63619	1.89892	7.33948	8.83272	6.83586	1.79412e-15	2.27251	up
Zjn_sc00004.1.g06560.1.am.mk	115	158	131	70	46	50	4.85479	7.10759	5.22572	2.79826	1.6865	2.04499	0.00174582	-1.23919	down
Zjn_sc00004.1.g06600.1.sm.mkhc	92	75	107	251	274	212	1.00002	0.832201	1.07319	2.60414	2.61727	2.20842	2.68922e-06	1.47475	up
Zjn_sc00004.1.g06610.1.sm.mkhc	2883	2872	2405	7277	8298	7600	57.2987	59.8556	45.261	136.155	142.368	145.304	9.62492e-17	1.54074	up
Zjn_sc00004.1.g06960.1.sm.mkhc	633	509	588	1463	1264	1535	4.55715	3.47014	3.43988	10.0761	8.01314	10.6706	1.55587e-10	1.35361	up
Zjn_sc00004.1.g06970.1.sm.mk	240	197	210	939	824	782	2.51286	2.18596	2.0744	9.37919	7.56139	7.89448	2.17713e-18	2.02069	up
Zjn_sc00004.1.g06980.1.am.mk	703	694	704	3299	1957	1843	10.3587	10.8928	9.85041	44.6559	24.2495	25.7157	0.0010335	1.80459	up
Zjn_sc00004.1.g07010.1.sm.mk	1252	1204	592	111	207	180	12.5512	12.7675	5.60854	1.05164	1.81559	1.73369	0.000190212	-2.59826	down
Zjn_sc00004.1.g07050.1.am.mk	361	345	360	115	170	119	3.86349	3.90644	3.65765	1.17145	1.58101	1.21246	1.2195e-06	-1.36766	down
Zjn_sc00004.1.g07070.1.am.mkhc	806	678	868	2103	2014	2752	5.25335	4.70428	5.35511	13.136	11.3706	17.5373	6.82141e-07	1.60469	up
Zjn_sc00004.1.g07090.1.sm.mkhc	12420	11370	11770	4471	6266	3870	258.045	248.651	228.037	87.3173	110.585	75.9744	1.96892e-11	-1.25418	down
Zjn_sc00004.1.g07170.1.am.mk	158	101	129	368	322	259	1.37649	0.577719	1.02779	1.90339	1.6241	1.35046	3.1825e-06	1.33594	up
Zjn_sc00004.1.g07180.1.sm.mk	31	61	53	204	243	286	1.50638	3.1401	2.44015	9.53197	10.4354	13.4921	1.33114e-12	2.38084	up
Zjn_sc00004.1.g07220.1.am.mkhc	605	670	545	274	222	224	3.27788	3.89387	2.79825	1.42015	1.06354	1.15059	8.77652e-08	-1.29825	down
Zjn_sc00004.1.g07410.1.sm.mkhc	2214	2397	1520	468	425	304	14.7051	17.0776	9.3041	2.95622	2.4921	1.97882	2.90468e-07	-2.33239	down
Zjn_sc00004.1.g07680.1.am.mk	60	46	90	7	10	7	1.9728	1.59487	2.80572	0.211826	0.289086	0.198552	2.69371e-06	-2.97775	down
Zjn_sc00004.1.g07800.1.sm.mk	568	559	724	1169	1216	1247	8.21934	8.57661	9.91701	16.1402	15.4189	17.3946	1.8052e-06	1.02466	up
Zjn_sc00004.1.g07810.1.sm.mkhc	7346	6186	5540	11685	12732	13235	268.003	237.781	189.023	408.011	407.5	467.015	3.39778e-08	1.02116	up
Zjn_sc00004.1.g07920.1.cf.mkhc	773	846	1108	314	366	371	23.9327	27.7345	32.407	9.25613	9.90982	11.0518	2.56458e-09	-1.32363	down
Zjn_sc00004.1.g07930.1.am.mk	3598	3271	3041	1009	985	656	64.818	61.7735	51.3416	17.164	15.3081	11.2525	1.77454e-21	-1.8703	down
Zjn_sc00004.1.g08100.1.sm.mkhc	479	431	504	764	1178	826	8.56761	8.13537	8.37224	12.9021	18.3289	14.1961	6.22537e-06	1.00411	up
Zjn_sc00004.1.g08440.1.am.mk	201	251	142	29	67	41	5.82174	7.70816	3.88376	0.786999	1.68083	1.12011	0.000144444	-2.11018	down
Zjn_sc00004.1.g08490.1.sm.mkhc	3168	3830	3747	1279	1614	1056	66.3402	84.9406	74.2007	25.5328	29.5782	21.2971	3.59715e-13	-1.41289	down
Zjn_sc00004.1.g08510.1.am.mk	410	524	568	212	249	245	9.30583	12.0594	12.7553	3.8884	4.27124	3.94219	3.43911e-05	-1.04388	down
Zjn_sc00004.1.g08770.1.am.mk	59	62	46	208	208	147	0.669971	0.742247	0.370897	2.19231	2.04607	1.47821	3.47189e-07	1.78041	up
Zjn_sc00004.1.g08920.1.sm.mk	1806	1495	811	138	124	74	38.672	33.9039	16.4169	2.80816	2.30773	1.51942	2.65068e-06	-3.59544	down
Zjn_sc00004.1.g08970.1.am.mk	5246	5546	6145	2532	3045	2407	163.315	183.833	182.117	74.9369	83.5618	72.1958	3.93815e-08	-1.04527	down
Zjn_sc00004.1.g09050.1.am.mkhc	578	814	804	1987	1597	2060	13.7727	19.4057	17.5934	43.7217	32.2536	45.0691	2.01188e-07	1.41367	up
Zjn_sc00004.1.g09170.1.am.mkhc	493	447	622	97	190	78	18.3742	17.622	21.9261	3.4225	6.19409	2.79566	3.19404e-15	-2.07224	down
Zjn_sc00004.1.g09180.1.sm.mkhc	1356	1225	1269	2527	2583	2620	25.074	23.996	22.194	44.5583	41.818	46.6705	1.01767e-07	1.05003	up
Zjn_sc00004.1.g09840.1.am.mkhc	129	87	110	297	283	257	1.30799	0.924288	1.0493	2.8701	2.50938	2.50623	2.65291e-06	1.40757	up
Zjn_sc00004.1.g09920.1.am.mk	75	112	81	16	7	2	3.90452	6.22607	4.02069	0.7769	0.28387	0.075869	1.83089e-09	-3.3922	down
Zjn_sc00004.1.g09940.1.am.mk	189	181	192	55	71	53	2.23834	2.26841	2.1511	0.615627	0.729475	0.595168	5.33991e-06	-1.61486	down
Zjn_sc00004.1.g10010.1.am.mk	247	302	216	1411	1020	1212	3.6285	4.71334	2.98604	19.7166	13.0999	17.1218	1.4945e-12	2.2919	up
Zjn_sc00004.1.g10020.1.sm.mkhc	1017	1005	957	353	453	477	12.7437	13.3774	11.2683	4.30243	5.00528	5.81038	9.799e-08	-1.17417	down
Zjn_sc00004.1.g10150.1.sm.mkhc	4935	4089	5233	9206	11140	9928	63.8803	56.0041	63.9729	113.452	126.174	123.668	1.15419e-09	1.1324	up
Zjn_sc00004.1.g10240.1.sm.mkhc	266	171	136	1659	1603	1466	6.46175	4.39486	3.11872	38.4867	34.1433	34.3533	2.4625e-44	3.07901	up
Zjn_sc00004.1.g10410.1.sm.mkhc	10297	8429	9178	21831	22585	21168	474.347	411.125	399.741	958.472	910.513	939.047	3.14863e-12	1.27645	up
Zjn_sc00004.1.g10580.1.sm.mk	1202	1384	1101	366	473	256	24.1139	29.3866	20.8902	6.97631	8.29817	4.93249	3.48883e-10	-1.73131	down
Zjn_sc00004.1.g10780.1.am.mkhc	51	95	95	10	39	34	0.376528	0.775264	0.731611	0.066751	0.237969	0.227584	0.00671857	-1.50632	down
Zjn_sc00004.1.g10810.1.sm.mk	505	474	412	137	278	103	10.5611	10.4532	8.12221	2.71415	5.15165	2.0894	1.26924e-05	-1.41739	down
Zjn_sc00004.1.g10830.1.am.mk	218	195	210	66	74	45	4.18252	3.9297	3.7824	1.20596	1.23279	0.81557	5.79055e-07	-1.71843	down
Zjn_sc00004.1.g10910.1.sm.mkhc	352	298	293	1018	1026	715	3.0962	2.77926	2.42831	8.54209	7.90655	6.06528	5.29357e-12	1.58332	up
Zjn_sc00004.1.g11010.1.sm.mk	6	10	14	41	65	57	0.447416	0.812365	1.03619	3.18182	4.62603	4.45982	0.00014587	2.49195	up
Zjn_sc00004.1.g11030.1.am.mk	312	454	413	766	1180	841	16.2745	25.1866	20.0008	35.5915	52.218	40.328	7.34556e-07	1.27002	up
Zjn_sc00004.1.g11040.1.am.mk	353	424	346	65	80	27	9.5073	12.0735	8.79102	1.65122	1.87203	0.695505	8.39086e-18	-2.69332	down
Zjn_sc00004.1.g11150.1.am.mk	265	375	368	801	852	735	6.19599	9.36091	8.14619	17.9054	17.4797	16.5613	1.47577e-08	1.28431	up
Zjn_sc00004.1.g11290.1.am.mk	2161	1905	1739	487	567	332	50.5337	46.589	38.5081	10.6508	11.647	7.42535	1.21148e-18	-2.03945	down
Zjn_sc00004.1.g11310.1.sm.mkhc	199	177	136	388	602	431	2.17839	1.67262	1.29557	3.11745	4.93979	3.73168	1.90016e-08	1.49564	up
Zjn_sc00004.1.g11330.1.sm.mkhc	39	11	5	104	94	117	0.348462	0.077982	0.028738	0.927364	0.612044	1.01957	7.89825e-08	2.55187	up
Zjn_sc00004.1.g11430.1.sm.mkhc	49	83	45	9	21	6	1.55989	2.79472	1.33909	0.267146	0.565797	0.176359	0.00210335	-2.31112	down
Zjn_sc00004.1.g11600.1.am.mk	514	457	469	164	340	187	11.1947	10.5425	9.6533	3.39443	6.44283	3.89064	6.96496e-05	-1.03802	down
Zjn_sc00004.1.g11650.1.sm.mkhc	929	1078	1224	357	372	412	13.7944	17.0687	17.3915	5.05876	4.91859	5.49585	2.17283e-11	-1.45129	down
Zjn_sc00004.1.g11730.1.sm.mkhc	1083	849	826	2695	2526	2770	13.4515	11.1497	9.69229	31.9164	27.4597	33.1451	9.30116e-16	1.57935	up
Zjn_sc00004.1.g11910.1.sm.mkhc	31282	24496	29977	78053	93266	82975	459.811	380.875	416.317	1093.9	1200.21	1173.19	7.45772e-19	1.61252	up
Zjn_sc00004.1.g11920.1.sm.mkhc	102	89	88	315	366	393	1.19863	0.92197	0.9044	3.26003	3.42389	4.11723	3.06527e-12	1.98783	up
Zjn_sc00004.1.g11930.1.am.mk	39	45	43	111	109	131	0.608552	0.749572	0.625911	1.67378	1.5154	1.99644	0.000328785	1.51371	up
Zjn_sc00004.1.g12030.1.sm.mkhc	1204	1058	932	430	320	569	13.7826	12.8338	9.98174	4.59867	3.1492	6.21282	1.7326e-05	-1.22119	down
Zjn_sc00004.1.g12110.1.am.mkhc	6343	6468	7090	14928	12709	13102	57.1736	65.503	63.6197	135.982	105.97	120.265	5.78581e-09	1.08232	up
Zjn_sc00004.1.g12140.1.am.mk	107	109	136	36	28	28	1.03367	1.12069	1.24469	0.33081	0.233173	0.260996	1.55181e-05	-1.88258	down
Zjn_sc00004.1.g12150.1.am.mk	3787	3279	3718	6848	8989	6821	208.181	190.845	193.236	358.746	432.451	361.088	2.53845e-09	1.10875	up
Zjn_sc00004.1.g12320.1.sm.mkhc	1341	995	1170	262	378	199	18.0398	14.1685	14.8841	3.3552	4.44199	2.57012	4.18762e-19	-2.03463	down
Zjn_sc00004.1.g12490.1.am.mk	38	43	43	104	110	80	1.41426	1.70128	1.49926	3.70328	3.59061	2.88407	0.00435605	1.28175	up
Zjn_sc00004.1.g12950.1.sm.mk	2071	2048	1383	861	620	478	92.808	97.1495	58.5667	36.7715	24.2833	20.5931	0.000269683	-1.45939	down
Zjn_sc00004.1.g13010.1.am.mkhc	113	142	117	326	332	358	1.58889	2.14258	1.55655	4.45465	4.15274	4.95883	1.18402e-07	1.48915	up
Zjn_sc00004.1.g13120.1.sm.mkhc	831	727	867	1630	1491	1713	5.72319	5.30839	5.6466	10.7079	8.98878	11.3934	4.31989e-07	1.04781	up
Zjn_sc00004.1.g13300.1.am.mk	152	63	81	383	435	244	6.57472	2.85724	3.28438	15.8264	16.4874	10.1677	2.84558e-06	1.87538	up
Zjn_sc00004.1.g13310.1.am.mk	1914	1647	1913	5507	5354	5522	32.2755	29.4002	30.4965	88.4925	79.0081	89.6697	7.62019e-18	1.63016	up
Zjn_sc00004.1.g13320.1.am.mk	101	60	79	258	273	239	3.67218	2.29701	2.71966	8.95637	8.69101	8.37346	3.48112e-08	1.7275	up
Zjn_sc00004.1.g13480.1.sm.mk	109	132	104	19	32	23	3.03817	3.76685	1.98639	0.441759	0.801922	0.432288	1.38256e-06	-2.19781	down
Zjn_sc00004.1.g13500.1.sm.mk	71	55	55	167	140	174	1.11361	0.917098	0.822356	2.61989	1.94349	2.65857	7.36813e-05	1.45915	up
Zjn_sc00004.1.g13510.1.am.mk	2160	2095	1941	5356	4831	5634	37.4612	37.8245	31.4752	96.2682	77.7379	99.4801	1.38117e-13	1.39797	up
Zjn_sc00004.1.g13590.1.sm.mkhc	1181	1243	1258	2873	4014	2228	30.9672	35.0711	31.7745	71.0225	91.2508	55.1785	2.06879e-05	1.33465	up
Zjn_sc00004.1.g13650.1.am.mk	28	41	58	150	151	234	0.882257	1.35369	1.73554	4.54447	4.19988	7.20103	4.40723e-05	2.14278	up
Zjn_sc00004.1.g13780.1.sm.mkhc	2437	2432	2347	5435	5389	5423	32.2275	34.0112	29.4818	69.1064	62.9652	69.2055	1.21821e-10	1.21356	up
Zjn_sc00004.1.g13940.1.am.mk	1435	1225	1084	258	140	164	24.4654	22.2234	17.7163	4.51695	2.57622	3.19713	5.02224e-19	-2.68778	down
Zjn_sc00004.1.g13960.1.am.mk	196	295	156	41	52	42	2.45131	3.91558	1.84461	0.48445	0.564892	0.500846	0.000530861	-2.24333	down
Zjn_sc00004.1.g13980.1.sm.mk	81	32	41	137	205	109	3.02549	1.24856	1.44435	4.87179	6.71174	3.91098	0.0004982	1.57688	up
Zjn_sc00004.1.g14040.1.sm.mkhc	214	289	262	113	148	105	3.61744	5.16748	4.18584	1.81067	2.18484	1.7022	0.00093763	-1.03326	down
Zjn_sc00004.1.g14220.1.sm.mk	28	11	10	44	77	64	0.984947	0.410127	0.334123	1.4782	2.36572	2.17139	0.00086788	1.94488	up
Zjn_sc00004.1.g14250.1.sm.mk	444	591	468	72	106	50	10.5222	14.8208	10.4801	1.62114	2.1889	1.12151	8.89858e-14	-2.70531	down
Zjn_sc00004.1.g14265.1.br	203	133	166	365	284	346	13.3392	9.23969	10.3249	22.9379	16.3638	21.9495	0.000232658	1.04193	up
Zjn_sc00004.1.g14270.1.sm.mkhc	1282	1010	1147	2240	1948	2688	5.35079	4.47085	4.53208	8.92671	7.11656	10.8126	0.000246875	1.05474	up
Zjn_sc00004.1.g14280.1.sm.mk	752	545	461	112	131	152	22.1318	16.9748	12.8256	3.12349	3.36207	4.30717	1.37721e-06	-2.11381	down
Zjn_sc00005.1.g00480.1.am.mkhc	327	266	244	78	105	98	7.29977	6.27187	5.1379	1.64837	2.03958	2.08999	4.70686e-07	-1.53873	down
Zjn_sc00005.1.g00680.1.sm.mk	246	245	282	127	138	92	20.6884	21.7657	22.3718	10.1104	10.1085	7.41647	0.000493204	-1.07633	down
Zjn_sc00005.1.g00750.1.sm.mkhc	84	53	73	4	23	11	0.618325	0.411176	0.50548	0.027087	0.144513	0.076746	3.29409e-05	-2.45151	down
Zjn_sc00005.1.g00810.1.sm.mkhc	97	176	89	24	18	22	0.667905	1.26035	0.717821	0.123595	0.13013	0.294751	0.00192012	-2.46973	down
Zjn_sc00005.1.g00900.1.sm.mk	1025	864	913	1912	1706	1908	10.6016	9.46361	8.92155	18.8509	15.4472	19.0021	4.53938e-07	1.02797	up
Zjn_sc00005.1.g01290.1.am.mk	158	109	172	256	325	442	1.38505	1.01581	1.43129	2.11773	2.52359	3.61594	0.00427035	1.28265	up
Zjn_sc00005.1.g01360.1.sm.mkhc	4100	2863	3219	8815	7806	10515	38.6931	28.6029	28.7201	79.2875	64.4744	95.568	8.7952e-07	1.46776	up
Zjn_sc00005.1.g01580.1.sm.mkhc	829	1002	819	374	497	254	26.3108	33.6668	24.5717	11.2932	13.7964	7.75115	1.17726e-05	-1.21656	down
Zjn_sc00005.1.g01610.1.sm.mk	190	148	182	570	480	487	1.91046	1.57834	1.73814	5.48204	4.24395	4.73106	1.97456e-10	1.61439	up
Zjn_sc00005.1.g01710.1.sm.mkhc	552	598	570	233	264	244	6.19729	7.12259	6.0628	2.48492	2.59156	2.63242	1.6982e-06	-1.17562	down
Zjn_sc00005.1.g01730.1.am.mk	784	686	695	1536	1812	1565	11.0291	10.1738	8.43658	20.2882	22.362	21.1116	2.10815e-09	1.22065	up
Zjn_sc00005.1.g01830.1.sm.mkhc	2249	1818	1903	900	1011	827	14.5693	12.4998	11.7504	5.5523	5.7397	5.51892	8.39609e-08	-1.08627	down
Zjn_sc00005.1.g01880.1.am.mk	53	78	55	132	169	184	0.862795	1.35006	0.850429	2.06257	2.43066	2.91088	9.3903e-05	1.416	up
Zjn_sc00005.1.g01940.1.am.mkhc	537	501	508	1169	1168	1147	11.9952	12.8842	11.7781	27.1986	24.7243	27.0264	1.25954e-08	1.21553	up
Zjn_sc00005.1.g02060.1.sm.mkhc	116	102	96	401	372	584	3.44249	3.21948	2.69538	11.3932	9.70322	16.7548	7.86927e-06	2.1643	up
Zjn_sc00005.1.g02370.1.am.mk	463	610	473	75	159	39	13.6648	19.042	13.1763	2.09493	4.07943	1.10849	3.26642e-10	-2.50508	down
Zjn_sc00005.1.g02480.1.am.mk	431	433	319	135	178	77	4.79261	5.09406	3.34374	1.41993	1.7144	0.81919	7.29383e-06	-1.58768	down
Zjn_sc00005.1.g02610.1.am.mk	454	301	400	1419	1471	1629	6.07718	4.25485	5.0604	18.1038	17.2349	20.99	1.45143e-21	2.02055	up
Zjn_sc00005.1.g02990.1.sm.mkhc	2640	2671	2710	1180	1180	912	35.852	38.4117	34.7866	15.2768	13.7464	11.8282	1.92034e-10	-1.25528	down
Zjn_sc00005.1.g03040.1.am.mk	27	20	30	134	150	96	0.689902	0.538165	0.730681	3.33578	3.41426	2.40669	5.91777e-08	2.34691	up
Zjn_sc00005.1.g03070.1.sm.mkhc	363	307	309	799	714	796	3.03249	2.71041	2.43429	6.36008	5.21888	6.40172	2.09506e-08	1.28453	up
Zjn_sc00005.1.g03130.1.sm.mkhc	175	123	141	36	54	22	4.25854	3.17691	3.24401	0.817135	1.14174	0.499757	1.40581e-06	-1.94906	down
Zjn_sc00005.1.g03190.1.sm.mkhc	862	672	937	1536	1535	1781	14.612	12.8501	15.4705	20.8338	23.2913	27.0991	7.54606e-07	1.02996	up
Zjn_sc00005.1.g03400.1.sm.mk	628	739	565	1276	1618	1168	53.3158	66.4524	45.3417	103.358	120.359	95.5854	1.00192e-07	1.09765	up
Zjn_sc00005.1.g03820.1.am.mk	1257	960	731	3432	3735	3798	18.2781	14.7806	10.0693	47.7171	47.7144	53.3878	1.82302e-23	1.92992	up
Zjn_sc00005.1.g04030.1.sm.mk	107	92	105	48	49	25	1.60869	1.45416	1.4911	0.683307	0.637458	0.361994	0.00482006	-1.2841	down
Zjn_sc00005.1.g04340.1.am.mk	449	483	528	256	171	202	6.17967	7.04031	6.86418	3.34914	2.05546	2.67506	4.19441e-06	-1.16098	down
Zjn_sc00005.1.g04410.1.sm.mkhc	133	141	168	27	45	29	4.28444	4.79486	5.13251	0.820979	1.25714	0.875317	2.26644e-07	-2.09621	down
Zjn_sc00005.1.g04550.1.sm.mkhc	335	175	311	483	631	717	5.8648	3.23112	5.13864	8.05676	9.66292	12.0875	0.000253201	1.21551	up
Zjn_sc00005.1.g04560.1.am.mk	110	122	134	520	343	286	1.61594	1.87845	1.82575	7.25636	4.42249	4.08324	0.000606351	1.69825	up
Zjn_sc00005.1.g04620.1.sm.mk	3971	3450	4391	2820	1013	1206	41.3625	37.4229	43.5542	27.5799	9.24425	11.8007	0.00131048	-1.16588	down
Zjn_sc00005.1.g04640.1.am.mk	241	195	162	57	50	27	9.26727	7.94095	5.8926	2.06694	1.66691	0.968749	2.24385e-08	-2.13093	down
Zjn_sc00005.1.g04940.1.am.mk	51	29	81	98	125	121	0.720784	0.439864	1.09159	1.32587	1.56705	1.66849	0.00664058	1.16539	up
Zjn_sc00005.1.g05130.1.sm.mkhc	800	703	953	1765	2057	1710	10.091	9.38711	11.3621	21.2176	22.7374	20.8116	1.86172e-09	1.21846	up
Zjn_sc00005.1.g05330.1.am.mk	109	110	103	503	574	435	2.20899	2.36289	1.96617	9.75749	10.2152	8.52347	6.53091e-18	2.26513	up
Zjn_sc00005.1.g05360.1.sm.mkhc	1932	1662	2069	3873	3424	4002	25.0759	22.8264	25.4357	47.9121	38.9017	50.1567	6.65391e-08	1.05109	up
Zjn_sc00005.1.g05510.1.am.mk	166	242	85	0	26	16	11.8355	18.307	5.70945	0	1.59555	1.04184	0.000838008	-3.57193	down
Zjn_sc00005.1.g05790.1.sm.mkhc	865	827	993	443	467	270	22.8773	23.7374	25.1558	11.6376	10.6464	7.03487	3.33322e-07	-1.14912	down
Zjn_sc00005.1.g05860.1.sm.mkhc	39361	41954	31833	6342	11357	5626	2357.73	2660.86	1802.79	362.006	595.34	324.483	4.7735e-12	-2.26616	down
Zjn_sc00005.1.g05900.1.am.mkhc	478	279	363	813	959	621	7.38213	4.46917	5.2435	11.8651	12.8584	9.18003	7.18943e-06	1.13258	up
Zjn_sc00005.1.g05950.1.sm.mk	392	437	524	112	132	109	10.3853	12.2594	13.1303	2.82081	3.04137	2.75815	1.51208e-12	-1.89454	down
Zjn_sc00005.1.g06040.1.am.mk	5867	4941	7148	13349	14614	10818	57.0995	51.9437	66.2108	124.811	124.245	101.571	4.04611e-10	1.15784	up
Zjn_sc00005.1.g06110.1.sm.mkhc	940	1026	843	284	348	185	11.8752	13.7099	10.0741	3.41892	3.84961	2.25354	3.10695e-12	-1.7601	down
Zjn_sc00005.1.g06390.1.am.mk	58	53	23	195	168	129	2.68163	2.62154	1.01075	8.6704	6.87734	5.79142	3.01482e-07	1.89454	up
Zjn_sc00005.1.g06400.1.am.mk	109	70	44	355	310	377	4.75343	3.21915	1.80557	14.7228	11.8004	15.8249	9.74064e-15	2.26067	up
Zjn_sc00005.1.g06570.1.am.mk	17096	18654	21608	6143	12083	6569	915.431	1057.57	1093.89	313.479	566.182	338.72	6.90351e-08	-1.18351	down
Zjn_sc00005.1.g06720.1.am.mkhc	313	235	282	113	163	108	11.2971	8.9874	9.6317	3.88654	5.13968	3.7373	0.000372951	-1.07769	down
Zjn_sc00005.1.g06750.1.am.mk	147	66	115	235	217	185	2.18739	1.0289	1.61518	3.32861	2.82783	2.64242	0.00208961	1.01007	up
Zjn_sc00005.1.g06780.1.sm.mkhc	90	106	84	35	37	43	3.5066	4.38908	3.10681	1.28072	1.2588	1.62552	0.00797649	-1.24392	down
Zjn_sc00005.1.g06840.1.sm.mkhc	3857	3895	3704	1761	1488	1230	56.613	60.5425	51.4136	24.6332	19.1182	17.3807	8.24875e-12	-1.31518	down
Zjn_sc00005.1.g06950.1.sm.mkhc	4432	3125	3386	9990	11483	9466	66.426	50.5484	47.7017	144.39	152.389	139.724	7.76373e-17	1.53811	up
Zjn_sc00005.1.g06970.1.am.mk	114	117	118	374	423	325	1.19934	1.20553	1.06112	3.86172	4.25054	3.41269	4.44102e-10	1.72137	up
Zjn_sc00005.1.g06980.1.sm.mk	75	45	40	199	207	223	2.36008	1.48963	1.16414	5.96326	5.69062	6.75658	3.83667e-09	2.01508	up
Zjn_sc00005.1.g07040.1.sm.mkhc	178	260	244	576	493	414	5.91552	9.14967	7.65528	18.2561	14.3646	13.2468	3.66838e-06	1.16107	up
Zjn_sc00005.1.g07100.1.am.mk	949	1058	846	4972	3759	4050	13.3896	15.5476	11.2546	66.6749	46.1097	54.9409	9.06205e-15	2.20457	up
Zjn_sc00005.1.g07370.1.am.mkhc	1458	1428	1107	704	716	482	42.3761	43.9312	30.4049	19.4901	18.2088	13.4793	0.000159942	-1.04285	down
Zjn_sc00005.1.g07950.1.sm.mkhc	7584	5697	6597	16519	14279	14238	98.0985	78.4491	81.0208	202.816	161.941	177.244	2.95883e-11	1.22808	up
Zjn_sc00005.1.g07980.1.am.mk	649	706	596	186	119	169	5.71333	6.56881	4.94487	1.55686	0.9034	1.42994	3.67757e-16	-1.99152	down
Zjn_sc00005.1.g08040.1.am.mk	174	132	194	340	340	406	7.17482	5.76686	7.59556	13.409	12.3025	16.1624	2.08232e-05	1.17772	up
Zjn_sc00005.1.g08320.1.sm.mkhc	1402	1082	974	3590	3751	4453	25.2888	20.6586	16.6144	61.7296	59.2255	77.3685	1.77304e-13	1.81346	up
Zjn_sc00005.1.g08440.1.am.mk	752	1061	646	149	209	147	20.1697	29.7708	16.3677	3.78157	4.84445	3.77966	1.56373e-05	-2.26666	down
Zjn_sc00005.1.g08450.1.am.mk	64	84	48	10	22	0	1.75285	2.41271	1.22965	0.258859	0.520243	0	8.17045e-05	-2.64688	down
Zjn_sc00005.1.g08520.1.am.mkhc	164	226	192	1110	734	1110	0.974869	1.41803	1.4362	6.40651	3.94347	6.48468	5.02232e-08	2.39503	up
Zjn_sc00005.1.g08620.1.sm.mkhc	588	645	683	199	314	158	6.33934	7.36731	6.96193	2.04481	2.96109	1.63873	9.99776e-10	-1.48906	down
Zjn_sc00005.1.g08680.1.sm.mkhc	6288	4564	5192	16061	15794	17952	46.5948	35.1327	35.0497	109.937	99.5479	124.682	9.07694e-20	1.68363	up
Zjn_sc00005.1.g08750.1.es.mkhc	19	7	14	85	131	88	0.234381	0.082876	0.167821	1.58447	2.31077	1.66271	3.99333e-09	2.96899	up
Zjn_sc00005.1.g08930.1.am.mk	331	240	211	598	774	487	5.6017	4.30342	3.38386	9.66592	11.4868	7.94336	1.32589e-06	1.2747	up
Zjn_sc00005.1.g08940.1.sm.mkhc	9805	6862	7931	24164	24498	22091	125.907	93.3036	95.4203	295.87	275.024	270.747	1.00968e-17	1.56818	up
Zjn_sc00005.1.g08960.1.sm.mkhc	356	327	376	1187	963	1248	2.53877	2.4977	2.53296	8.21491	6.10191	8.70448	1.05376e-10	1.73728	up
Zjn_sc00005.1.g09270.1.sm.mkhc	374	395	444	993	651	855	1.8846	2.10887	2.12086	4.78669	2.88233	4.16506	0.000820904	1.09977	up
Zjn_sc00005.1.g09450.1.sm.mk	296	402	369	92	92	65	6.57253	9.09305	7.13454	2.1156	1.67354	1.20794	1.32996e-12	-2.06527	down
Zjn_sc00005.1.g09530.1.am.mk	22	30	28	70	80	74	0.254521	0.373825	0.314621	0.794309	0.829506	0.842423	0.00327288	1.52454	up
Zjn_sc00006.1.g00070.1.sm.mkhc	338	359	387	135	157	149	2.42513	2.69923	2.58022	0.883994	0.959062	0.998458	5.92911e-06	-1.25396	down
Zjn_sc00006.1.g00110.1.sm.mk	1273	994	1248	3046	2776	3174	23.0186	19.0163	21.3311	52.4879	43.9295	55.2582	6.02934e-13	1.40925	up
Zjn_sc00006.1.g00190.1.sm.mk	102	91	88	152	224	201	12.1255	11.4921	9.87152	17.2356	23.4067	23.0418	0.00136107	1.07391	up
Zjn_sc00006.1.g00280.1.sm.mkhc	2384	2002	2016	5851	5893	5980	29.6063	26.3021	24.6252	65.8086	62.7359	67.1591	8.56031e-16	1.51253	up
Zjn_sc00006.1.g00460.1.am.mkhc	189	189	229	77	115	69	6.26097	6.62115	7.17438	2.41597	3.33159	2.19205	0.000481667	-1.18424	down
Zjn_sc00006.1.g00520.1.am.mk	21	19	24	195	173	185	0.375306	0.359841	0.403371	3.34352	2.71933	3.20303	1.38285e-15	3.16439	up
Zjn_sc00006.1.g00580.1.am.mk	234	163	184	836	947	783	3.2666	2.40007	2.42332	11.1238	11.572	10.5323	5.57266e-21	2.18297	up
Zjn_sc00006.1.g00760.1.sm.mkhc	499	414	396	89	66	65	10.2161	8.95033	7.63215	1.74799	1.17756	1.26723	2.98161e-19	-2.52874	down
Zjn_sc00006.1.g00890.1.sm.mk	16	13	11	67	55	51	0.151257	0.129629	0.091647	0.612438	0.454542	0.463324	0.000469629	2.15106	up
Zjn_sc00006.1.g01040.1.sm.mkhc	694	668	630	309	159	140	9.08438	9.25028	7.79403	3.8449	1.81609	1.7557	3.78668e-11	-1.66584	down
Zjn_sc00006.1.g01050.1.am.mk	3769	3633	1738	331	472	179	117.976	122.123	52.1041	9.96468	13.0829	5.4387	2.48304e-05	-3.21947	down
Zjn_sc00006.1.g01090.1.sm.mkhc	807	925	1023	352	358	298	12.2329	13.7383	14.0648	4.57531	4.86412	4.13159	2.98758e-10	-1.40751	down
Zjn_sc00006.1.g01290.1.sm.mkhc	78	107	45	11	23	8	2.39966	3.50387	1.30106	0.306584	0.599117	0.235786	0.00307238	-2.4668	down
Zjn_sc00006.1.g01500.1.am.mk	546	433	460	1000	924	1307	13.6206	11.187	10.8047	23.3	19.6563	30.5888	0.000208677	1.22032	up
Zjn_sc00006.1.g01560.1.sm.mk	36829	38307	36786	10636	9342	7292	756.531	832.219	713.903	208.328	167.719	144.203	1.93566e-27	-1.99864	down
Zjn_sc00006.1.g01570.1.am.mk	62	83	48	12	11	9	0.914851	1.29568	0.672384	0.165064	0.133442	0.118534	3.01529e-05	-2.56836	down
Zjn_sc00006.1.g01670.1.sm.mkhc	7991	9022	10665	2856	3551	3069	225.263	267.773	285.144	77.2023	87.1696	83.9829	5.77662e-16	-1.5024	down
Zjn_sc00006.1.g01730.1.am.mk	74	99	122	37	46	23	1.03093	1.45961	1.60657	0.490759	0.55379	0.30195	0.00190979	-1.4424	down
Zjn_sc00006.1.g01760.1.sm.mk	34	53	21	81	105	69	0.546589	0.88993	0.316026	1.23497	1.47637	1.06206	0.00787718	1.24452	up
Zjn_sc00006.1.g01830.1.am.mk	437	693	361	176	47	30	16.4327	27.5996	12.8497	6.30732	1.53297	1.05375	0.000891325	-2.52535	down
Zjn_sc00006.1.g01910.1.am.mk	8542	6611	8302	16514	20934	16328	280.966	227.523	254.315	507.23	596.879	502.827	1.38109e-11	1.23835	up
Zjn_sc00006.1.g01980.1.am.mk	178	199	165	26	38	18	8.01426	9.48148	7.01634	1.08669	1.46976	0.778147	4.73518e-12	-2.70777	down
Zjn_sc00006.1.g02070.1.sm.mk	497	514	423	183	289	173	11.0567	12.0988	8.88985	3.87031	5.62078	3.69975	1.41009e-05	-1.13217	down
Zjn_sc00006.1.g02080.1.sm.mk	121	99	161	46	65	45	7.98745	6.921	10.1122	2.86875	3.73612	2.82469	0.00230865	-1.24216	down
Zjn_sc00006.1.g02170.1.am.mkhc	2929	3159	4620	14863	16300	15237	42.6034	48.5016	64.2113	206.94	210.537	214.373	4.08482e-31	2.16973	up
Zjn_sc00006.1.g02220.1.sm.mkhc	164	155	179	64	65	54	2.58075	2.5919	2.67181	0.955656	0.911618	0.82234	0.000131113	-1.40072	down
Zjn_sc00006.1.g02360.1.am.mk	302	254	327	562	649	589	6.43991	5.74287	6.59357	11.4386	12.1234	12.105	8.31242e-06	1.07469	up
Zjn_sc00006.1.g02730.1.am.mk	497	548	642	124	159	120	8.98481	10.6019	11.342	2.21725	2.64041	2.02991	2.03383e-15	-2.02563	down
Zjn_sc00006.1.g02820.1.am.mk	63	71	65	128	144	162	0.940536	1.13467	0.924889	1.83328	1.89479	2.34463	0.00201614	1.16791	up
Zjn_sc00006.1.g02880.1.sm.mk	92	103	99	19	34	24	2.28891	2.70288	2.31754	0.449175	0.737917	0.557886	6.92355e-05	-1.90474	down
Zjn_sc00006.1.g02960.1.sm.mkhc	537	370	414	907	1193	988	11.7923	8.60408	8.60516	18.9948	22.9551	20.8893	5.47987e-09	1.26325	up
Zjn_sc00006.1.g02980.1.am.mk	352	340	280	152	95	52	8.31024	8.47752	6.25013	3.41086	1.96028	1.16415	8.30553e-07	-1.66799	down
Zjn_sc00006.1.g03160.1.sm.mk	1397	1555	1344	612	632	570	15.7288	18.5252	14.4254	6.61314	6.19032	6.25144	8.76578e-09	-1.20722	down
Zjn_sc00006.1.g03270.1.sm.mkhc	456	370	628	971	916	918	4.23907	3.68082	5.51678	8.6061	7.46019	8.22315	7.33102e-06	1.0084	up
Zjn_sc00006.1.g03440.1.sm.mk	417	395	224	47	60	31	17.6839	17.7376	8.99107	1.89701	2.20768	1.25336	2.79832e-06	-2.89784	down
Zjn_sc00006.1.g03940.1.am.mk	2874	3172	2446	1186	1203	886	58.2287	74.3537	52.0931	20.1777	21.718	12.8232	3.03379e-07	-1.34568	down
Zjn_sc00006.1.g04110.1.am.mk	139	119	74	32	57	34	2.87405	2.59289	1.44791	0.62265	1.02854	0.658856	0.00607152	-1.42113	down
Zjn_sc00006.1.g04130.1.sm.mkhc	17328	15442	12930	7697	6567	4980	121.408	114.142	87.0439	51.7621	41.1146	35.3223	6.72188e-06	-1.21399	down
Zjn_sc00006.1.g04180.1.am.mk	34	39	48	105	89	112	0.402387	0.483298	0.53764	1.17565	0.920175	1.26783	0.00187218	1.39623	up
Zjn_sc00006.1.g04190.1.am.mk	334	574	353	1271	890	735	7.45698	13.2597	7.06106	26.7753	16.918	15.6472	0.0072861	1.22839	up
Zjn_sc00006.1.g04370.1.sm.mk	84	124	128	14	67	27	7.01251	10.9984	10.1659	1.09074	4.86615	2.10953	0.000605619	-1.63143	down
Zjn_sc00006.1.g04380.1.sm.mkhc	2377	2298	1886	990	1078	895	46.1111	47.2488	34.781	18.5928	18.299	16.7763	3.60753e-07	-1.11449	down
Zjn_sc00006.1.g04480.1.sm.mk	163	167	90	2	13	9	4.18397	4.53483	2.17312	0.039259	0.272059	0.221976	1.76887e-08	-4.12735	down
Zjn_sc00006.1.g04600.1.sm.mkhc	149	205	139	8	16	7	3.36881	5.09003	3.03835	0.117437	0.313288	0.072818	7.65714e-13	-3.98677	down
Zjn_sc00006.1.g04730.1.sm.mkhc	67	57	58	166	192	220	0.78346	0.701432	0.639997	2.06842	2.23494	2.49983	8.12857e-07	1.71277	up
Zjn_sc00006.1.g04820.1.am.mk	42	15	26	79	80	66	1.91453	0.689451	1.10003	3.40768	3.19993	2.90957	0.00422268	1.48705	up
Zjn_sc00006.1.g05080.1.sm.mkhc	1111	1221	1321	2517	2935	2029	20.0029	23.2695	22.4716	43.1814	46.2316	35.1639	4.80906e-08	1.07059	up
Zjn_sc00006.1.g05360.1.am.mk	359	532	292	91	106	26	8.26042	12.9554	6.34104	1.97825	2.12506	0.572142	0.00024297	-2.40849	down
Zjn_sc00006.1.g05940.1.am.mk	59	63	74	17	19	18	1.95682	2.18698	2.31975	0.533254	0.536756	0.55839	0.00159151	-1.81305	down
Zjn_sc00006.1.g06120.1.sm.mkhc	2204	2428	2735	1081	1845	678	72.3828	84.4386	84.9395	33.8223	53.0234	21.4192	0.000660732	-1.01237	down
Zjn_sc00006.1.g06240.1.am.mk	4188	5492	3191	182	289	277	69.8393	97.036	50.3793	2.86127	4.18097	4.36621	1.22516e-10	-4.08226	down
Zjn_sc00006.1.g06850.1.sm.mkhc	12467	10906	14878	27288	29865	28132	131.754	121.915	149.089	274.565	276.018	285.642	5.20651e-11	1.20754	up
Zjn_sc00006.1.g07210.1.sm.mk	1088	1422	799	142	126	83	19.0857	26.753	13.0806	2.40239	1.9797	1.36617	1.96286e-07	-3.21729	down
Zjn_sc00007.1.g00060.1.sm.mkhc	920	931	515	269	375	267	10.7671	11.5352	5.69468	2.99931	3.83594	3.00431	0.00695966	-1.3614	down
Zjn_sc00007.1.g00270.1.sm.mkhc	2398	2178	2233	871	1131	624	47.1644	45.3565	41.5894	16.2787	19.4554	11.8157	2.2356e-11	-1.34687	down
Zjn_sc00007.1.g00300.1.am.mk	140	108	185	34	45	11	2.17936	1.78433	2.73669	0.495981	0.609699	0.152907	6.84945e-08	-2.23667	down
Zjn_sc00007.1.g00370.1.sm.mkhc	272	223	238	107	183	65	20.4748	17.7391	16.9219	7.67959	12.0242	4.6999	0.00139548	-1.03057	down
Zjn_sc00007.1.g00490.1.sm.mkhc	1260	1356	1319	566	789	411	32.3772	36.8531	32.0034	13.8276	17.7405	10.1531	1.39649e-07	-1.13149	down
Zjn_sc00007.1.g00710.1.am.mk	75	93	72	182	160	133	1.33151	1.75591	1.20476	3.10135	2.48955	2.28546	0.00473292	1.01827	up
Zjn_sc00007.1.g00790.1.sm.mkhc	3036	2394	2381	1168	998	866	22.8932	19.328	17.9591	8.21068	6.82441	4.43177	5.42873e-09	-1.32418	down
Zjn_sc00007.1.g00920.1.sm.mk	25	27	32	184	183	223	0.184483	0.20707	0.220122	1.31538	1.19633	1.60565	2.66676e-14	2.86646	up
Zjn_sc00007.1.g00975.1.br	734	1090	854	463	507	319	11.7906	18.3298	12.8588	7.25068	7.20243	5.1239	0.00329388	-1.02946	down
Zjn_sc00007.1.g01030.1.sm.mkhc	4556	5024	4814	2151	2508	1628	58.4265	67.7192	58.2459	25.2228	27.7146	19.0482	1.38726e-09	-1.16389	down
Zjn_sc00007.1.g01110.1.sm.mkhc	760	852	525	90	81	42	12.5878	14.9413	8.22349	1.4143	1.16419	0.661556	4.97042e-10	-3.30873	down
Zjn_sc00007.1.g01150.1.sm.mkhc	521	425	428	1100	1428	995	14.657	12.6512	11.3815	29.524	35.1946	26.9833	5.38769e-11	1.39028	up
Zjn_sc00007.1.g01220.1.am.mkhc	68	83	79	291	192	469	1.69821	2.18536	1.86463	6.9692	4.2046	11.3504	0.00998546	2.11487	up
Zjn_sc00007.1.g01280.1.sm.mkhc	725	645	920	1900	1721	2087	6.28976	5.67081	7.5586	15.6897	12.7356	17.1736	1.03597e-10	1.37756	up
Zjn_sc00007.1.g01400.1.am.mk	1388	1094	1510	3268	3805	3920	34.3443	29.913	35.6724	74.5278	78.2589	88.0452	4.82012e-15	1.51347	up
Zjn_sc00007.1.g01450.1.am.mkhc	736	687	611	337	288	228	5.56774	5.13038	4.30356	2.49931	1.96541	1.5958	2.90468e-07	-1.21725	down
Zjn_sc00007.1.g01470.1.am.mk	3684	2683	4369	7729	8229	7273	80.8164	62.2298	91.1587	162.61	157.942	154.646	5.68289e-10	1.16765	up
Zjn_sc00007.1.g01990.1.sm.mkhc	5100	4034	4558	12045	9713	14727	28.6708	24.0164	24.1683	64.6326	47.8025	79.8491	6.7183e-05	1.47164	up
Zjn_sc00007.1.g02020.1.sm.mk	188	225	258	73	100	101	5.42889	6.88672	7.03214	1.9899	2.5094	2.80118	0.000119124	-1.24582	down
Zjn_sc00007.1.g02050.1.am.mk	171	170	149	69	82	36	2.7885	2.97966	2.39338	1.11131	1.21696	0.572956	0.000250674	-1.36946	down
Zjn_sc00007.1.g02190.1.sm.mkhc	1723	1111	821	295	293	191	7.17165	4.86501	3.22655	1.15849	1.0574	0.752489	0.000726137	-2.20491	down
Zjn_sc00007.1.g02195.1.br	1124	970	638	189	218	193	20.3218	18.5657	10.8986	3.24561	3.43743	3.34658	1.05012e-05	-2.15965	down
Zjn_sc00007.1.g02260.1.sm.mkhc	494	411	448	909	1023	1138	10.8943	9.58728	9.33415	19.1156	19.7447	24.1811	1.78504e-08	1.22917	up
Zjn_sc00007.1.g02270.1.sm.mkhc	143	168	134	381	345	456	1.45918	1.82583	1.28863	3.70784	3.1006	4.51265	3.40056e-07	1.45363	up
Zjn_sc00007.1.g02380.1.sm.mkhc	10876	7298	12854	27390	26025	32514	90.0079	63.4896	100.236	217.065	191.472	259.858	4.0796e-09	1.53467	up
Zjn_sc00007.1.g02470.1.am.mk	77	67	64	167	158	143	0.764278	0.71125	0.602507	1.59292	1.38574	1.38098	0.000964429	1.20991	up
Zjn_sc00007.1.g02660.1.sm.mkhc	1025	1129	1167	448	863	313	61.462	72.3609	66.9122	25.3623	47.6063	18.1888	0.00135691	-1.0181	down
Zjn_sc00007.1.g02780.1.am.mk	1723	1152	1759	438	1108	544	85.033	60.1837	82.115	20.5753	47.8533	25.8541	0.00225445	-1.12195	down
Zjn_sc00007.1.g02850.1.am.mk	731	619	622	2757	2506	2891	8.84896	7.96373	7.13838	31.735	26.6122	33.8501	9.25334e-26	2.09509	up
Zjn_sc00007.1.g02980.1.sm.mkhc	533	367	342	1498	1269	1597	8.39714	6.11935	5.09569	22.5078	17.5071	24.236	7.9828e-12	1.85993	up
Zjn_sc00007.1.g03040.1.am.mkhc	2009	1362	1800	3698	2777	4420	10.029	7.19812	8.48358	17.5799	12.1034	20.8691	0.00374084	1.13824	up
Zjn_sc00007.1.g03270.1.sm.mk	258	152	194	862	612	887	22.1415	13.7465	15.7103	70.52	45.939	73.3473	1.6969e-07	2.02611	up
Zjn_sc00007.1.g03460.1.sm.mkhc	1181	975	1030	2082	2269	1998	19.2901	16.8527	15.9015	32.4102	32.4357	31.4256	2.14496e-07	1.03551	up
Zjn_sc00007.1.g03570.1.sm.mkhc	8833	9642	8670	3233	3656	2147	193.418	224.697	179.078	67.9452	69.475	43.6776	1.16162e-16	-1.55945	down
Zjn_sc00007.1.g03620.1.sm.mkhc	382	423	447	757	874	844	5.4913	6.7289	6.14826	10.4524	10.64	11.6366	5.36993e-06	1.02675	up
Zjn_sc00007.1.g03820.1.sm.mk	70	80	129	33	5	26	2.24134	2.69973	3.89966	1.00374	0.13714	0.796864	6.43811e-05	-2.02895	down
Zjn_sc00007.1.g03840.1.sm.mkhc	4482	4469	3414	667	680	353	120.05	126.775	86.3355	16.9985	15.7764	9.0726	1.82959e-16	-2.84085	down
Zjn_sc00007.1.g04100.1.sm.mk	263	278	244	65	36	47	11.556	12.9749	10.1695	2.71412	1.37965	1.99442	5.89151e-13	-2.35689	down
Zjn_sc00007.1.g04220.1.sm.mkhc	1269	1114	1912	2991	3134	3343	10.9612	10.1252	14.2552	25.2818	22.3166	25.558	1.00094e-09	1.2024	up
Zjn_sc00007.1.g04235.1.br	79	82	144	271	229	286	1.54153	1.70969	2.67977	5.08409	3.94314	5.41746	3.89849e-06	1.43526	up
Zjn_sc00007.1.g04300.1.am.mkhc	328	361	333	97	174	119	5.17964	6.05126	4.97511	1.46242	2.40418	1.80191	1.93346e-06	-1.36392	down
Zjn_sc00007.1.g04620.1.am.mk	1046	1214	952	344	359	293	15.6636	19.1719	13.4897	4.92167	4.56102	4.33955	2.53363e-10	-1.65791	down
Zjn_sc00007.1.g04640.1.sm.mkhc	4124	3348	4094	12330	8630	10504	47.4856	40.3126	43.9327	159.233	84.5935	113.038	8.30259e-07	1.50017	up
Zjn_sc00007.1.g04670.1.am.mk	15	17	19	72	100	70	0.192504	0.271576	0.273536	1.06994	1.37485	1.06146	1.52277e-05	2.28223	up
Zjn_sc00007.1.g04680.1.cf.mkhc	3088	2364	3403	7482	5961	8423	28.2246	24.5805	34.2142	70.4079	50.6277	77.054	1.47152e-05	1.36771	up
Zjn_sc00007.1.g04890.1.sm.mkhc	8	25	20	108	55	81	0.080323	0.276068	0.188106	1.06986	0.496992	0.812928	0.000308444	2.25411	up
Zjn_sc00007.1.g04920.1.sm.mkhc	748	858	888	186	289	223	17.7902	21.609	19.9593	4.21327	6.00042	5.09998	7.711e-15	-1.80272	down
Zjn_sc00007.1.g04940.1.sm.mkhc	3165	4304	2795	573	784	358	45.9171	66.1072	38.3349	7.92294	9.95429	4.99853	1.6942e-07	-2.57134	down
Zjn_sc00007.1.g05200.1.sm.mk	1328	1206	1349	3088	2976	2634	17.2942	16.6323	16.4836	38.225	33.9062	32.9808	5.74e-10	1.20784	up
Zjn_sc00007.1.g05260.1.sm.mk	99	42	27	197	163	165	2.21882	0.989219	0.572845	4.20935	3.19611	3.55986	5.36993e-06	1.67756	up
Zjn_sc00007.1.g05270.1.sm.mk	24	35	70	111	94	107	0.498691	0.786243	1.41819	2.27459	1.76319	2.21377	0.00274777	1.34894	up
Zjn_sc00007.1.g05420.1.am.mk	101	194	292	30	44	60	1.66022	3.40143	4.56789	0.463914	0.632814	0.957589	0.0048453	-2.0646	down
Zjn_sc00007.1.g05610.1.sm.mkhc	1283	1226	1281	447	628	384	23.5845	23.8651	22.2624	7.83234	10.0953	6.78779	3.30748e-10	-1.34761	down
Zjn_sc00007.1.g05670.1.sm.mkhc	5332	5598	6222	1292	1533	1199	157.762	175.393	174.055	36.4334	39.6867	34.1615	7.23323e-27	-2.05197	down
Zjn_sc00007.1.g05840.1.am.mk	1219	1359	796	238	297	233	46.3053	54.655	28.5937	8.59126	9.85269	8.5018	2.00831e-05	-2.11497	down
Zjn_sc00007.1.g05890.1.sm.mkhc	331	219	203	66	55	34	5.87209	4.11118	3.398	1.10958	0.840341	0.56592	3.4115e-06	-2.24787	down
Zjn_sc00007.1.g05900.1.am.mkhc	7660	6000	7615	14017	13928	16129	94.1788	77.6943	88.3672	165.689	151.022	193.061	3.11191e-09	1.10425	up
Zjn_sc00007.1.g05950.1.sm.mkhc	92	63	51	232	160	139	1.00829	0.760772	0.529242	2.77157	1.59836	1.6262	0.00152432	1.40366	up
Zjn_sc00007.1.g05970.1.am.mk	59	56	42	11	24	2	1.54825	1.57994	1.0403	0.259601	0.538342	0.049389	0.00181979	-2.1023	down
Zjn_sc00007.1.g06010.1.sm.mkhc	41	30	29	92	81	77	0.631119	0.475487	0.416465	1.34813	1.09143	1.1444	0.00520765	1.3635	up
Zjn_sc00007.1.g06040.1.am.mk	272	354	227	55	38	62	7.42313	10.2065	5.84017	1.41274	0.90065	1.61949	3.88098e-07	-2.41602	down
Zjn_sc00007.1.g06060.1.sm.mk	62	34	13	83	103	104	1.199	0.687528	0.224236	1.54297	1.75296	1.95369	0.00145432	1.43288	up
Zjn_sc00007.1.g06070.1.sm.mk	214	142	141	570	548	506	3.45726	2.32214	2.07714	8.39098	7.90454	7.61591	2.98071e-12	1.74868	up
Zjn_sc00007.1.g06100.1.sm.mkhc	3856	3271	2951	1582	1591	1568	36.9213	31.1833	24.9862	13.939	12.7882	14.1093	8.42323e-07	-1.04838	down
Zjn_sc00007.1.g06340.1.am.mkhc	346	322	298	768	743	652	4.50359	4.50152	3.76815	9.59223	8.4487	8.30486	1.86288e-07	1.20127	up
Zjn_sc00007.1.g06430.1.am.mk	1210	1389	1476	3664	3360	2719	20.1736	24.229	22.9607	56.7344	49.1088	42.8312	1.67613e-11	1.29986	up
Zjn_sc00007.1.g06450.1.sm.mkhc	2343	2072	2387	4976	5095	5317	28.4651	26.8223	27.4724	58.0194	54.5106	62.6652	1.04449e-10	1.2261	up
Zjn_sc00007.1.g06470.1.sm.mkhc	1401	1148	1485	2746	2570	3226	11.6431	10.3689	12.0454	22.078	19.2489	26.4566	5.08409e-07	1.13911	up
Zjn_sc00007.1.g06520.1.am.mk	47	54	45	17	5	9	0.492961	0.610705	0.453949	0.17361	0.046426	0.083531	0.00139318	-2.17787	down
Zjn_sc00007.1.g06560.1.sm.mk	2043	2265	602	79	132	73	33.4569	39.1079	9.28653	1.21042	1.90475	1.16656	0.000684775	-4.11923	down
Zjn_sc00007.1.g06580.1.sm.mkhc	3907	3354	3305	7437	6998	8126	37.5071	34.0701	30.02	68.4573	59.0628	75.1709	1.15191e-09	1.14099	up
Zjn_sc00007.1.g06610.1.am.mk	324	203	349	813	960	895	5.95528	4.00489	6.05461	14.1906	15.3864	15.8489	2.26094e-13	1.66151	up
Zjn_sc00007.1.g06650.1.sm.mk	856	934	1036	2394	2911	1759	105.329	121.617	120.44	280.8	313.512	208.369	9.42931e-08	1.35553	up
Zjn_sc00007.1.g06660.1.sm.mk	111	170	141	353	420	271	6.82867	11.1034	8.25112	20.8558	22.7694	16.1401	1.2398e-06	1.33353	up
Zjn_sc00007.1.g06670.1.am.mk	17	16	16	82	84	81	0.393304	0.380335	0.329719	1.8081	1.70108	1.79837	6.46555e-06	2.37593	up
Zjn_sc00007.1.g06720.1.am.mkhc	15385	11859	14263	34042	35324	31141	259.655	209.644	226.734	544.072	514.545	512.047	4.63342e-13	1.32078	up
Zjn_sc00007.1.g07080.1.am.mkhc	516	499	512	174	152	115	2.99662	3.06623	2.81187	0.962962	0.769352	0.638479	1.03197e-11	-1.75209	down
Zjn_sc00007.1.g07190.1.sm.mk	99	62	50	9	31	12	2.4573	1.61206	1.16766	0.205175	0.664883	0.275334	0.00295718	-2.02191	down
Zjn_sc00007.1.g07500.1.am.mkhc	1670	1329	1506	2946	3479	2679	55.352	46.6418	47.1885	93.1028	100.961	85.5361	5.58431e-08	1.05371	up
Zjn_sc00007.1.g07510.1.sm.mk	157	177	151	53	79	48	1.78997	2.08183	1.58342	0.580996	0.85476	0.506089	0.000177475	-1.40716	down
Zjn_sc00007.1.g07600.1.sm.mk	1140	903	622	212	359	233	8.21226	6.91701	4.24323	1.45532	2.23948	1.62677	0.000559778	-1.71223	down
Zjn_sc00007.1.g07620.1.am.mkhc	101	103	99	166	249	205	1.42837	1.54021	1.31159	2.22468	3.08077	2.77938	0.00106176	1.06665	up
Zjn_sc00007.1.g07760.1.am.mkhc	3893	3379	3922	8980	8516	10401	26.3636	23.9696	24.4655	57.9241	50.4367	67.539	1.10165e-10	1.37022	up
Zjn_sc00007.1.g07800.1.sm.mk	97	82	75	198	252	260	1.66595	1.49185	1.19886	3.23759	3.78801	4.30556	1.59755e-06	1.52202	up
Zjn_sc00007.1.g07850.1.am.mk	1689	2009	1520	823	831	366	16.2084	19.9607	13.5454	7.69507	7.05429	3.53296	8.99597e-05	-1.35005	down
Zjn_sc00007.1.g08010.1.sm.mk	192	141	126	697	585	754	2.2506	1.67502	1.31797	7.81602	6.10261	8.5909	7.46608e-14	2.19578	up
Zjn_sc00007.1.g08070.1.sm.mkhc	6620	6872	3931	951	876	323	109.463	120.324	61.4506	14.98	12.6716	5.13317	3.43396e-07	-3.00785	down
Zjn_sc00007.1.g08110.1.am.mk	614	759	315	9	8	27	7.2433	9.47029	3.49241	0.091554	0.067608	0.280751	9.14224e-08	-5.21153	down
Zjn_sc00007.1.g08270.1.sm.mkhc	2782	2371	3422	5404	5817	6218	56.7416	51.3686	66.1528	105.578	104.479	123.261	1.5762e-08	1.07976	up
Zjn_sc00007.1.g08740.1.am.mk	310	291	238	513	858	536	5.97096	5.93688	4.33425	9.4313	14.4987	9.96625	0.000216199	1.20505	up
Zjn_sc00007.1.g08830.1.sm.mkhc	554	559	607	1114	1262	1180	5.8168	6.20054	6.05175	11.352	11.8424	11.9891	3.06468e-07	1.09131	up
Zjn_sc00007.1.g08850.1.sm.mk	481	431	286	31	47	31	4.26739	4.04909	2.39729	0.260548	0.359906	0.258042	2.49101e-10	-3.44087	down
Zjn_sc00007.1.g08860.1.sm.mk	1487	1742	961	364	392	212	49.8726	61.9226	30.697	11.6305	11.4888	6.9341	0.000132475	-2.10107	down
Zjn_sc00007.1.g09170.1.sm.mk	655	699	870	375	333	310	5.61325	6.33183	7.05292	3.05114	2.48361	2.54408	2.90056e-06	-1.0768	down
Zjn_sc00007.1.g09230.1.am.mk	1712	1041	1261	244	103	136	39.9844	25.7103	27.8501	5.41884	2.09605	3.0582	2.38802e-11	-2.99516	down
Zjn_sc00007.1.g09250.1.sm.mk	207	101	236	64	45	77	7.16788	3.68961	7.71167	2.08778	1.36063	2.54477	0.00467924	-1.46837	down
Zjn_sc00007.1.g09280.1.sm.mk	267	199	324	990	1042	964	3.8136	3.00385	4.38204	13.5039	13.0533	13.286	1.50837e-18	1.97853	up
Zjn_sc00007.1.g09290.1.am.mk	79	66	88	192	154	191	0.964724	0.846795	1.00676	2.22779	1.64202	2.24682	0.000336441	1.26327	up
Zjn_sc00007.1.g09300.1.sm.mkhc	2274	1776	2423	4402	4298	5012	23.4117	18.4985	22.6839	42.2045	37.5584	46.9323	3.2272e-09	1.13901	up
Zjn_sc00007.1.g09430.1.sm.mkhc	245	275	243	812	643	691	2.90364	3.44456	2.72406	9.17855	6.67009	7.88539	4.78323e-11	1.53561	up
Zjn_sc00007.1.g09600.1.sm.mk	2132	1900	1889	5442	5008	5183	41.5538	39.2183	34.8028	101.104	85.4369	97.2991	2.02259e-14	1.4452	up
Zjn_sc00007.1.g09760.1.sm.mk	122	122	187	42	44	34	8.15521	8.65264	11.8446	2.65937	2.53716	2.15493	6.46905e-06	-1.79304	down
Zjn_sc00007.1.g09830.1.sm.mk	1225	1076	1150	2878	2674	2555	18.5573	17.2672	16.4692	41.5729	35.4658	37.2925	7.09226e-11	1.27696	up
Zjn_sc00007.1.g10260.1.am.mk	176	156	158	449	429	568	3.14008	2.94295	2.64335	7.63012	6.68509	9.76242	4.86264e-08	1.6118	up
Zjn_sc00007.1.g10550.1.am.mk	277	394	323	108	231	95	5.56472	8.40373	6.14434	2.06614	4.06911	1.83084	0.00422757	-1.18751	down
Zjn_sc00007.1.g10600.1.sm.mkhc	1068	1011	797	380	525	257	27.3989	27.3477	19.5946	9.30833	11.74	6.27538	3.47689e-05	-1.29078	down
Zjn_sc00007.1.g10690.1.sm.mkhc	11620	16340	12048	2958	4215	3607	130.4	201.102	128.879	31.3279	41.1493	36.8388	8.01162e-07	-1.86446	down
Zjn_sc00007.1.g10700.1.am.mk	942	851	1124	2185	2113	1835	42.4039	40.5568	47.8662	93.8057	83.3192	79.6167	2.60595e-08	1.12138	up
Zjn_sc00007.1.g10810.1.sm.mkhc	555	529	489	1398	1532	1315	4.63182	4.17208	4.1665	12.6526	10.1165	9.24106	1.54043e-12	1.46878	up
Zjn_sc00007.1.g10850.1.am.mk	200	280	138	7	9	18	2.72144	4.03819	1.77935	0.072691	0.091763	0.236992	3.86182e-07	-4.14399	down
Zjn_sc00007.1.g10930.1.am.mk	329	221	219	534	612	559	8.77528	6.23972	5.50433	13.5761	14.2769	14.3645	9.69892e-07	1.18714	up
Zjn_sc00007.1.g10940.1.am.mkhc	2508	2014	2290	5627	5435	6313	39.8114	33.802	34.3892	85.0626	75.2786	95.5718	1.21069e-13	1.40133	up
Zjn_sc00007.1.g11050.1.sm.mkhc	257	279	184	42	83	66	11.0632	12.7433	7.50739	1.71062	3.10887	2.73438	5.54651e-06	-1.89517	down
Zjn_sc00007.1.g11120.1.am.mk	183	165	204	675	406	791	2.57278	2.44469	2.70396	9.05122	4.99767	10.7078	0.00119174	1.82994	up
Zjn_sc00007.1.g11180.1.sm.mk	216	180	196	453	614	542	6.91662	6.09304	5.92071	13.828	17.214	16.7246	2.30718e-09	1.48209	up
Zjn_sc00007.1.g11230.1.am.mkhc	1840	1661	1805	3490	3576	4280	12.0878	11.7671	11.0497	20.7681	20.6536	27.305	2.54997e-08	1.14637	up
Zjn_sc00007.1.g11360.1.sm.mkhc	2146	2247	2318	4463	5386	4069	55.8083	61.8733	56.9912	110.636	122.594	101.91	8.56131e-09	1.08861	up
Zjn_sc00007.1.g11490.1.am.mk	758	711	608	322	295	121	10.1575	9.94689	8.99991	3.84645	3.11532	1.92835	1.83147e-06	-1.46969	down
Zjn_sc00007.1.g11880.1.am.mk	129	146	135	235	318	377	1.27256	1.51917	1.25767	2.20362	2.74431	3.57669	0.000377572	1.22501	up
Zjn_sc00007.1.g11900.1.sm.mkhc	11	3	13	62	73	89	0.091684	0.020162	0.099145	0.504619	0.547779	0.74142	1.40147e-07	3.13201	up
Zjn_sc00007.1.g11910.1.sm.mkhc	700	448	319	1779	3200	3251	7.8376	5.31188	3.38804	19.0525	31.4437	35.119	7.54859e-07	2.51718	up
Zjn_sc00007.1.g12160.1.sm.mkhc	11	0	0	39	47	50	0.126197	0	0	0.439341	0.488308	0.568964	4.26663e-06	3.66124	up
Zjn_sc00008.1.g00040.1.am.mkhc	138	176	191	60	88	42	5.44837	7.34901	7.14706	2.26645	3.05111	1.5972	0.000174341	-1.38424	down
Zjn_sc00008.1.g00170.1.sm.mkhc	106	157	95	47	38	38	1.33258	2.08168	1.12708	0.555655	0.408073	0.455017	0.00249479	-1.51058	down
Zjn_sc00008.1.g00200.1.sm.mkhc	8181	8986	8074	2759	3170	1945	130.951	148.329	120.68	41.61	44.1985	28.9655	1.65707e-18	-1.65248	down
Zjn_sc00008.1.g00260.1.sm.mk	37	26	44	98	88	131	0.703397	0.530718	0.803989	1.81209	1.48187	2.43869	0.000274656	1.63566	up
Zjn_sc00008.1.g00360.1.am.mk	5674	5309	7541	1703	1803	1303	161.331	159.838	202.73	46.1271	44.8484	35.657	7.10407e-23	-1.89863	down
Zjn_sc00008.1.g00460.1.am.mk	56	62	68	168	176	101	0.951142	1.11284	1.08882	2.73012	2.6193	1.64647	0.000552309	1.29315	up
Zjn_sc00008.1.g00520.1.am.mk	231	150	125	572	539	396	9.31834	6.40996	4.75291	22.0082	19.0642	15.3794	1.15345e-08	1.60569	up
Zjn_sc00008.1.g00680.1.am.mk	469	557	457	177	216	144	14.1807	17.8267	12.9731	4.8472	5.49984	3.94955	2.5002e-08	-1.43913	down
Zjn_sc00008.1.g00690.1.sm.mkhc	66	100	182	245	321	270	2.42605	3.89057	6.29181	8.55389	10.3109	9.53978	1.15495e-05	1.32469	up
Zjn_sc00008.1.g00810.1.sm.mkhc	4359	3353	3567	9606	9338	10482	65.4474	53.3578	50.3664	137.318	122.565	151.324	1.29123e-14	1.43084	up
Zjn_sc00008.1.g00860.1.am.mk	34	51	26	96	111	95	0.972064	1.55808	0.695604	2.66647	2.8198	2.66288	0.000941858	1.46286	up
Zjn_sc00008.1.g00870.1.am.mk	114	87	64	323	358	337	0.987493	0.800939	0.568319	2.67996	2.88413	2.85297	7.30264e-12	1.9736	up
Zjn_sc00008.1.g00880.1.am.mk	2180	1300	1122	5714	5837	5799	37.3346	23.5519	18.1561	93.247	87.4392	95.602	6.69732e-25	1.95219	up
Zjn_sc00008.1.g00990.1.am.mk	777	676	621	295	243	269	14.236	13.1162	10.7446	5.13766	3.89668	4.74306	2.10498e-08	-1.31721	down
Zjn_sc00008.1.g01030.1.am.mk	201	238	174	87	104	51	3.8854	4.88475	3.17546	1.59833	1.76381	0.941197	0.000111147	-1.32387	down
Zjn_sc00008.1.g01040.1.am.mkhc	8528	8739	7778	1300	2013	866	174.232	189.101	150.136	25.2685	35.7149	17.0564	1.44873e-32	-2.56732	down
Zjn_sc00008.1.g01200.1.am.mk	514	574	425	99	131	86	18.4968	21.8623	14.4604	3.38178	4.1268	2.96685	1.39094e-11	-2.23753	down
Zjn_sc00008.1.g01270.1.am.mk	27	16	40	74	83	64	1.53478	0.926597	2.15025	4.01675	4.16788	3.55363	0.00533838	1.47553	up
Zjn_sc00008.1.g01310.1.sm.mk	37	33	33	67	118	95	0.242975	0.226171	0.203862	0.425293	0.68285	0.609209	0.00145121	1.47514	up
Zjn_sc00008.1.g01320.1.am.mk	758	555	1186	1358	2386	1852	29.4527	22.8204	43.5957	50.3072	81.2207	69.3533	0.00079412	1.21808	up
Zjn_sc00008.1.g01410.1.am.mkhc	11433	9394	12709	22453	23021	24490	63.803	57.3072	68.5301	118.239	113.409	135.523	1.81152e-09	1.11445	up
Zjn_sc00008.1.g01440.1.sm.mk	93	67	89	190	170	219	3.73746	2.8407	3.35319	7.26087	5.95503	8.47125	0.000194581	1.27511	up
Zjn_sc00008.1.g01470.1.sm.mkhc	924	1010	928	282	463	204	41.3625	47.7258	39.3629	11.9865	18.0808	8.68224	3.69215e-12	-1.57589	down
Zjn_sc00008.1.g01590.1.sm.mkhc	86	104	129	20	33	18	2.48593	3.18824	3.5265	0.544661	0.832372	0.48422	5.33991e-06	-2.13601	down
Zjn_sc00008.1.g01780.1.sm.mk	71	91	100	25	43	19	2.98367	4.0412	3.9604	0.994232	1.56793	0.744766	0.0016325	-1.56804	down
Zjn_sc00008.1.g01800.1.sm.mk	1449	1337	1392	381	536	527	20.7551	20.28	18.8498	5.19379	6.71445	7.27274	1.36405e-12	-1.49162	down
Zjn_sc00008.1.g01840.1.am.mk	34	31	4	136	132	111	0.515566	0.498799	0.05018	1.9973	1.78571	1.65196	1.08321e-08	2.46049	up
Zjn_sc00008.1.g01930.1.sm.mkhc	307	273	242	667	557	772	2.0604	1.93512	1.53475	4.26892	3.27162	4.99653	1.20854e-05	1.32846	up
Zjn_sc00008.1.g01950.1.am.mk	2809	4074	3113	667	835	527	85.8423	132.864	89.7366	19.5481	22.4868	15.6063	1.06481e-08	-2.27773	down
Zjn_sc00008.1.g02030.1.sm.mkhc	598	576	768	1358	1606	1234	12.2368	12.4735	14.8553	26.4925	28.7771	24.3326	2.9898e-08	1.15715	up
Zjn_sc00008.1.g02090.1.sm.mk	170	151	64	8	7	17	1.39397	1.31196	0.490991	0.062472	0.045619	0.128249	0.000127771	-3.54443	down
Zjn_sc00008.1.g02190.1.am.mk	458	187	372	820	1057	686	2.54236	1.21678	1.94585	4.14951	5.12437	3.46169	2.9136e-06	1.37892	up
Zjn_sc00008.1.g02210.1.am.mk	9740	7834	6820	23427	25769	23307	377.057	321.131	249.625	864.359	873.053	868.912	1.11476e-18	1.60707	up
Zjn_sc00008.1.g02250.1.am.mk	13368	9043	11284	2795	1882	2380	581.825	417.297	463.274	101.021	71.5547	87.8701	1.19644e-14	-2.19841	down
Zjn_sc00008.1.g02260.1.am.mkhc	2733	3691	3380	7766	6757	6063	24.2139	34.7853	29.0149	67.1106	54.8696	54.1332	1.3254e-08	1.11078	up
Zjn_sc00008.1.g02680.1.sm.mkhc	2329	1988	2467	4361	4119	4977	25.5372	23.0931	25.5591	45.6342	39.6053	52.4961	7.35799e-08	1.04281	up
Zjn_sc00008.1.g02700.1.am.mkhc	444	371	391	767	1077	882	9.89558	8.74882	8.24098	16.3026	21.0277	18.946	3.88978e-08	1.21291	up
Zjn_sc00008.1.g02770.1.am.mk	142	126	156	501	460	367	2.1287	1.99676	2.21083	7.17098	6.04689	5.31447	1.41681e-10	1.69296	up
Zjn_sc00008.1.g02920.1.am.mkhc	1412	1203	1401	3433	3170	3282	25.4504	22.9385	23.8682	58.9647	49.9864	56.9914	3.59555e-12	1.34869	up
Zjn_sc00008.1.g03230.1.sm.mkhc	178	178	222	734	656	883	1.74659	1.85638	2.06802	6.89677	5.65762	8.38328	9.01389e-11	2.03412	up
Zjn_sc00008.1.g03380.1.sm.mkhc	223	231	310	645	570	793	1.75412	1.91291	2.30086	4.84079	3.92158	6.00668	4.62383e-06	1.45634	up
Zjn_sc00008.1.g03750.1.am.mk	256	428	475	123	131	168	2.87992	5.10903	5.0529	1.31496	1.29649	1.82244	0.000649984	-1.40306	down
Zjn_sc00008.1.g04100.1.am.mk	547	597	499	99	176	84	6.58006	7.59844	5.67591	1.13141	1.85213	0.962604	8.99547e-17	-2.18003	down
Zjn_sc00008.1.g04160.1.sm.mk	2494	1886	2043	561	725	558	205.592	164.626	159.274	44.067	52.2558	44.2387	8.8521e-16	-1.76431	down
Zjn_sc00008.1.g04400.1.sm.mk	913	977	894	207	269	203	14.749	16.7112	13.664	3.18169	3.8026	3.15714	2.50098e-18	-2.00403	down
Zjn_sc00008.1.g04410.1.am.mk	51	48	54	16	12	13	0.876639	0.862612	0.842045	0.26294	0.190728	0.205471	0.00459564	-1.84838	down
Zjn_sc00008.1.g04530.1.sm.mkhc	1447	1085	1204	2526	2143	2945	5.50985	4.35375	4.36794	9.12378	7.09242	10.8858	0.000192734	1.08144	up
Zjn_sc00008.1.g04770.1.am.mk	1148	834	926	1942	2287	1864	23.2665	17.8785	17.7361	37.5159	40.5718	36.38	3.0846e-08	1.10615	up
Zjn_sc00008.1.g04870.1.sm.mk	188	125	109	488	700	456	3.50128	2.46857	1.91944	8.72256	11.4721	8.20887	3.4639e-12	1.98636	up
Zjn_sc00008.1.g05220.1.am.mk	320	386	325	771	596	700	2.47828	3.17553	2.38346	5.71346	4.04638	5.23125	1.24326e-05	1.04794	up
Zjn_sc00008.1.g05540.1.am.mk	5637	5967	4991	1760	1919	1382	124.816	139.667	104.633	37.0897	37.2934	29.4805	7.3413e-15	-1.68334	down
Zjn_sc00008.1.g05610.1.sm.mk	940	1164	1171	440	489	419	16.136	21.1585	19.0148	7.19809	7.34801	6.93049	1.12924e-08	-1.24085	down
Zjn_sc00008.1.g05620.1.sm.mk	4726	3475	1118	130	99	72	90.6594	70.3575	20.2358	2.34032	1.50322	1.18531	0.000186343	-4.93731	down
Zjn_sc00008.1.g05820.1.sm.mk	88	54	88	200	213	157	10.4604	6.78018	9.93337	22.7527	22.2421	17.9823	7.73272e-05	1.35791	up
Zjn_sc00008.1.g05950.1.am.mk	905	829	915	1716	1579	2031	14.5495	14.6398	14.4745	26.5619	22.9578	32.5815	5.9854e-06	1.06055	up
Zjn_sc00008.1.g05960.1.sm.mkhc	7775	6218	6496	15833	16219	15122	141.538	114.284	108.3	256.663	248.276	241.706	1.19326e-11	1.24535	up
Zjn_sc00008.1.g05970.1.am.mk	53	56	24	140	161	121	0.992257	1.1121	0.431834	2.53958	2.67988	2.20178	1.39724e-05	1.679	up
Zjn_sc00008.1.g06130.1.sm.mkhc	904	776	897	2631	2676	2410	11.626	10.5196	10.9749	32.4161	30.3745	30.1493	1.62319e-16	1.62727	up
Zjn_sc00008.1.g06590.1.am.mk	2193	1984	2595	5495	5950	5791	24.4597	23.3114	27.2536	58.173	58.1336	61.4851	1.38323e-13	1.3982	up
Zjn_sc00008.1.g06730.1.am.mk	165	173	154	67	58	68	1.86844	2.07728	1.6579	0.72473	0.573813	0.738408	0.000354013	-1.3051	down
Zjn_sc00008.1.g06740.1.am.mk	713	790	941	153	324	172	20.8304	24.4425	26.005	4.25336	8.26846	4.82421	9.33118e-16	-1.88701	down
Zjn_sc00008.1.g06750.1.am.mk	174	168	181	47	90	46	13.2575	13.5036	13.0129	3.41364	5.96481	3.36815	4.52073e-05	-1.49261	down
Zjn_sc00008.1.g06800.1.am.mk	56	78	53	27	19	17	0.537996	0.786972	0.479587	0.24255	0.153566	0.151363	0.00813872	-1.53617	down
Zjn_sc00008.1.g06880.1.sm.mk	853	1467	810	330	243	173	9.99924	18.2635	8.97807	3.67957	2.49459	1.95688	0.00238966	-2.04643	down
Zjn_sc00008.1.g07010.1.sm.mkhc	1236	971	1517	1918	2568	2966	6.93323	6.05443	8.60136	10.6685	13.3744	17.0669	0.00097659	1.05885	up
Zjn_sc00008.1.g07180.1.am.mk	28	39	23	81	107	47	0.497812	0.723956	0.378596	1.37272	1.66754	0.8037	0.00519073	1.39173	up
Zjn_sc00008.1.g07360.1.sm.mkhc	170	174	160	365	413	401	0.887419	0.939238	0.794661	1.79909	1.90439	1.98059	2.12018e-06	1.26524	up
Zjn_sc00008.1.g07410.1.am.mk	822	690	511	1819	2143	1271	69.8233	62.0436	40.9927	147.367	159.374	103.994	3.90891e-06	1.39229	up
Zjn_sc00008.1.g07470.1.sm.mkhc	368	382	411	1120	887	816	5.92596	6.17661	6.08115	16.2485	12.2144	11.8914	6.01751e-08	1.32843	up
Zjn_sc00008.1.g07545.1.br	32	44	55	401	305	342	0.490128	0.717813	0.804602	5.97963	4.17315	5.1561	5.7252e-22	3.05745	up
Zjn_sc00008.1.g07740.1.am.mk	9167	10867	12898	23935	28945	28913	490.862	616.076	652.948	1221.44	1356.39	1490.88	1.11135e-13	1.3607	up
Zjn_sc00008.1.g07820.1.sm.mkhc	134636	133415	87039	16589	21142	13273	1003.08	1053.92	611.875	117.213	137.523	94.8661	3.8135e-09	-2.78158	down
Zjn_sc00008.1.g08340.1.sm.mkhc	38789	31591	44786	81913	77191	86308	407.057	352.972	459.366	818.103	702.326	900.785	4.68672e-10	1.1484	up
Zjn_sc00008.1.g08490.1.sm.mk	182	174	130	388	408	313	10.1123	10.2358	6.80457	20.5768	19.8837	16.7647	5.8154e-06	1.21859	up
Zjn_sc00008.1.g08620.1.am.mk	2171	2412	2214	709	680	495	41.4277	48.321	39.2383	12.6473	11.2008	8.93924	2.40291e-19	-1.81637	down
Zjn_sc00008.1.g08670.1.sm.mk	191	132	187	365	475	448	8.99543	6.53668	8.29223	16.3564	19.5752	20.293	1.43985e-07	1.38534	up
Zjn_sc00008.1.g08790.1.am.mk	43	34	54	107	100	87	0.351557	0.286602	0.442502	0.839026	0.688572	0.662064	0.00730433	1.22118	up
Zjn_sc00008.1.g08900.1.sm.mkhc	558	744	661	1490	1416	1342	14.1113	20.1613	15.9596	36.231	31.6853	33.0433	2.68979e-08	1.15352	up
Zjn_sc00008.1.g08940.1.sm.mkhc	95	82	128	236	223	262	1.36985	1.2694	1.80998	3.28146	2.84455	3.86118	3.97017e-05	1.30291	up
Zjn_sc00008.1.g09100.1.sm.mkhc	1123	1148	1012	361	447	213	25.3655	27.4707	21.6377	7.75586	8.84853	4.63143	6.22742e-14	-1.66374	down
Zjn_sc00008.1.g09150.1.sm.mkhc	854	718	990	1567	1571	1869	4.92088	4.42661	5.29488	8.81797	7.80508	10.4823	8.25853e-07	1.02388	up
Zjn_sc00008.1.g09600.1.am.mk	84	39	66	190	248	220	2.13519	1.04039	1.58884	4.61595	5.54153	5.40389	3.28604e-08	1.84896	up
Zjn_sc00008.1.g09610.1.sm.mk	3	25	44	149	136	138	0.140663	0.811742	1.35659	4.3194	3.81306	4.18369	6.70669e-10	2.62772	up
Zjn_sc00008.1.g09620.1.sm.mkhc	1153	1175	1803	475	525	454	14.6669	16.2646	23.2651	5.74458	5.7323	5.42995	1.85551e-07	-1.45275	down
Zjn_sc00008.1.g09730.1.sm.mk	679	659	665	213	247	165	36.7872	37.8179	34.0992	11.0084	11.7198	8.58378	8.60109e-12	-1.64719	down
Zjn_sc00008.1.g09780.1.am.mk	5502	5688	3864	1230	1196	651	200.372	219.312	133.072	42.6506	38.0822	22.7874	3.49938e-08	-2.27039	down
Zjn_sc00008.1.g09860.1.am.mk	124	119	98	289	245	225	1.47447	1.49493	1.09621	3.27076	2.54253	2.57321	9.1633e-05	1.19167	up
Zjn_sc00008.1.g09980.1.sm.mkhc	4775	3299	4142	10384	9948	13301	46.9916	34.4019	38.6372	98.4195	84.9209	124.869	8.49054e-07	1.51724	up
Zjn_sc00008.1.g10020.1.sm.mkhc	8133	10409	7521	2070	2523	1783	204.058	271.584	178.185	49.5393	55.6708	42.9121	2.10978e-08	-2.00737	down
Zjn_sc00008.1.g10080.1.am.mk	586	567	675	261	229	237	5.43175	5.8287	5.60541	2.3517	1.72336	2.13939	1.0452e-07	-1.27921	down
Zjn_sc00008.1.g10280.1.am.mkhc	3763	3063	4039	6914	6696	7953	40.7854	38.9939	41.1036	78.6608	63.3614	82.8233	3.91756e-08	1.04462	up
Zjn_sc00008.1.g10380.1.am.mk	411	428	282	91	110	90	6.23757	6.9014	4.02456	1.31313	1.45233	1.30656	2.05312e-06	-1.92087	down
Zjn_sc00008.1.g10470.1.sm.mkhc	521	470	589	1503	1626	2291	6.6699	6.3589	7.12373	18.3296	18.219	28.2452	1.10106e-05	1.83664	up
Zjn_sc00008.1.g10520.1.am.mk	429	471	390	110	135	145	9.18406	10.9763	7.96768	2.64619	2.5065	3.5433	3.2617e-10	-1.68785	down
Zjn_sc00008.1.g10600.1.sm.mkhc	4272	2669	4769	2103	765	1109	107.385	71.0264	113.334	50.3757	16.8151	26.8276	0.000415661	-1.48355	down
Zjn_sc00008.1.g10720.1.sm.mk	888	809	858	301	416	241	36.5885	35.2966	33.413	11.8174	15.0022	9.5659	1.35436e-09	-1.38631	down
Zjn_sc00008.1.g10790.1.am.mk	194	253	173	75	59	69	2.3217	3.22754	1.96327	0.850005	0.610958	0.793654	3.79584e-05	-1.57283	down
Zjn_sc00008.1.g10820.1.sm.mkhc	1144	981	1418	2505	2119	2243	20.554	19.1506	23.2451	43.1715	33.408	36.5655	5.40701e-07	1.01231	up
Zjn_sc00008.1.g10860.1.sm.mk	226	239	161	49	32	26	5.66424	6.34239	3.81342	1.16607	0.692055	0.625805	6.86185e-09	-2.51606	down
Zjn_sc00008.1.g11180.1.am.mk	1216	1042	934	136	381	82	48.9131	44.374	35.5205	5.18704	13.3919	3.14077	6.47897e-12	-2.42087	down
Zjn_sc00008.1.g11230.1.am.mk	104	80	93	303	253	136	2.00072	1.63686	1.69558	5.58113	4.28659	2.53417	0.0088652	1.35817	up
Zjn_sc00008.1.g11270.1.sm.mkhc	4180	5415	4094	1237	1187	1110	108.491	148.815	100.457	30.598	26.9575	27.7227	4.08369e-09	-1.9194	down
Zjn_sc00008.1.g11290.1.am.mk	65	34	77	155	262	203	0.995761	0.545768	1.12443	2.28177	3.5489	3.02747	6.66261e-08	1.87028	up
Zjn_sc00008.1.g11390.1.sm.mkhc	1121	1009	1115	3742	3524	3638	16.2522	15.4727	15.2709	51.5598	44.6785	50.5798	1.88552e-20	1.79614	up
Zjn_sc00008.1.g11690.1.am.mk	2821	2457	2747	1060	1181	950	23.2447	17.9605	21.3631	8.15709	8.28841	7.35011	5.59257e-11	-1.29009	down
Zjn_sc00008.1.g11730.1.am.mk	258	253	287	102	180	74	10.0522	10.4313	10.5724	3.7649	6.12656	2.76693	0.000235446	-1.14404	down
Zjn_sc00008.1.g11780.1.am.mk	890	977	788	393	388	281	7.80755	9.09061	6.60375	3.43812	3.02913	2.49031	4.59807e-08	-1.29167	down
Zjn_sc00008.1.g11790.1.am.mk	169	313	202	67	25	2	9.19767	18.0965	10.4121	3.46742	1.19137	0.08582	0.000114482	-2.83759	down
Zjn_sc00008.1.g11990.1.sm.mkhc	950	1015	1067	305	366	219	22.1156	25.0138	23.4813	6.75276	7.44233	4.889	8.14023e-15	-1.73646	down
Zjn_sc00008.1.g12030.1.am.mkhc	653	668	788	312	427	289	13.1813	14.2373	15.0288	5.99513	7.52647	5.6001	2.2326e-05	-1.0002	down
Zjn_sc00008.1.g12050.1.sm.mkhc	7971	11462	6621	1855	1563	642	174.028	264.975	136.679	38.5918	29.8508	13.485	1.09821e-05	-2.66842	down
Zjn_sc00009.1.g00260.1.am.mk	274	227	215	935	1028	762	4.61076	4.04345	3.41513	15.0326	15.1755	12.3756	4.42855e-18	1.96175	up
Zjn_sc00009.1.g00500.1.am.mk	610	496	529	150	306	149	17.1424	14.7692	14.0672	4.00841	7.52521	4.01151	2.3628e-08	-1.41496	down
Zjn_sc00009.1.g00630.1.am.mkhc	5046	4164	5094	9755	9810	10525	64.4281	56.3976	62.0875	119.769	110.531	130.054	1.86834e-09	1.12355	up
Zjn_sc00009.1.g00670.1.sm.mkhc	1292	1488	1439	2723	3335	2883	24.4548	30.3359	26.176	49.6369	55.6048	53.0101	7.10956e-09	1.12104	up
Zjn_sc00009.1.g00820.1.am.mk	437	323	433	140	130	233	15.7513	12.3314	14.7916	4.81613	4.08939	8.08335	1.30471e-05	-1.1799	down
Zjn_sc00009.1.g00870.1.sm.mk	227	171	283	106	54	143	8.59675	6.86683	10.1565	3.82084	1.76304	5.22434	0.0039436	-1.085	down
Zjn_sc00009.1.g00890.1.sm.mkhc	495	427	354	212	233	161	5.83794	5.47027	4.01051	2.315	2.41527	1.83234	0.000140964	-1.04591	down
Zjn_sc00009.1.g00920.1.sm.mk	74	123	39	6	7	1	0.940391	1.70475	0.477766	0.084282	0.06252	0.005948	0.00126513	-4.09516	down
Zjn_sc00009.1.g00960.1.am.mkhc	578	588	614	1397	1120	1474	3.78949	3.98889	3.75273	8.5087	6.42966	8.84317	2.00844e-06	1.21794	up
Zjn_sc00009.1.g01130.1.sm.mkhc	320	391	206	7	10	22	12.6351	16.3845	7.68999	0.229761	0.316897	0.817273	1.14688e-09	-4.51081	down
Zjn_sc00009.1.g01140.1.am.mkhc	839	622	1014	378	169	359	8.54255	6.70425	9.76309	3.66333	1.49892	3.5056	1.83448e-05	-1.3713	down
Zjn_sc00009.1.g01300.1.sm.mkhc	3059	2608	4127	7229	6871	6859	39.4178	35.4986	50.286	88.7974	77.1839	84.6255	1.1155e-09	1.15586	up
Zjn_sc00009.1.g01430.1.sm.mkhc	4996	4566	4207	1705	1999	1654	66.9082	64.9248	53.437	21.7775	23.792	21.2897	4.17686e-12	-1.32691	down
Zjn_sc00009.1.g01560.1.sm.mk	62	87	59	11	26	9	2.68969	3.95455	2.41986	0.454951	0.953608	0.366775	0.000184917	-2.17997	down
Zjn_sc00009.1.g01610.1.sm.mkhc	973	896	1100	1953	1850	2027	13.1595	12.6038	14.4466	24.8495	21.9131	26.323	4.69744e-07	1.02592	up
Zjn_sc00009.1.g01700.1.am.mk	30	15	37	91	86	129	0.534667	0.288101	0.633422	1.57641	1.35946	2.26362	2.39907e-05	1.97731	up
Zjn_sc00009.1.g01950.1.am.mk	286	284	329	530	672	585	3.12035	3.04747	3.14791	6.08457	6.37161	5.86783	1.70416e-05	1.03382	up
Zjn_sc00009.1.g02040.1.es.mkhc	942	1020	920	365	532	469	16.9967	19.2436	15.7878	6.14085	8.60159	8.25099	2.96656e-06	-1.04317	down
Zjn_sc00009.1.g02070.1.am.mkhc	662	645	778	1696	1437	1614	9.52136	9.81475	10.5298	23.222	17.9734	21.9671	2.09021e-09	1.24059	up
Zjn_sc00009.1.g02080.1.sm.mkhc	3589	2600	3104	6831	8186	6282	46.6789	37.894	39.2867	90.4067	101.534	84.2095	3.21234e-11	1.23616	up
Zjn_sc00009.1.g02110.1.sm.mkhc	9415	7086	8748	19147	21455	18878	177.106	139.731	152.729	339.647	348.377	334.949	2.9142e-12	1.28093	up
Zjn_sc00009.1.g02120.1.am.mk	50	35	26	94	88	80	1.2252	0.900037	0.600237	2.20447	1.89968	1.90395	0.0070808	1.27202	up
Zjn_sc00009.1.g02150.1.am.mk	1713	2009	1683	1003	733	746	12.3258	15.8203	11.3012	6.76872	4.53174	5.08299	4.31939e-06	-1.08101	down
Zjn_sc00009.1.g02250.1.sm.mk	127	97	98	38	34	24	5.8182	4.69045	4.21898	1.62549	1.35447	1.02064	0.000151569	-1.70919	down
Zjn_sc00009.1.g02260.1.sm.mkhc	2880	3097	2298	876	854	460	53.2972	63.2271	41.4831	13.7855	12.7926	5.93663	9.72198e-09	-1.89544	down
Zjn_sc00009.1.g02340.1.am.mk	50	86	88	29	24	30	4.68351	8.57669	7.81219	2.59524	1.94596	2.73333	0.00810747	-1.37958	down
Zjn_sc00009.1.g02400.1.sm.mkhc	902	1413	1059	351	449	322	20.1444	33.4276	22.369	7.47	8.77251	6.91333	0.00013135	-1.56352	down
Zjn_sc00009.1.g02540.1.am.mk	415	329	365	852	1245	916	8.69423	7.3506	7.00404	17.3355	22.883	18.2787	1.25939e-11	1.47652	up
Zjn_sc00009.1.g02560.1.am.mk	529	464	556	1429	1224	1203	12.3058	11.4393	12.2255	31.7207	24.9332	26.9815	1.13417e-10	1.36561	up
Zjn_sc00009.1.g02860.1.am.mkhc	710	767	919	343	528	245	32.6291	37.3263	39.921	15.0024	21.2073	10.8435	3.65289e-06	-1.0749	down
Zjn_sc00009.1.g03100.1.sm.mk	201	327	166	76	56	22	9.57995	16.4808	7.47063	3.4086	2.31939	0.980681	0.00330225	-2.16026	down
Zjn_sc00009.1.g03120.1.sm.mkhc	3609	3139	3187	1072	1560	889	80.1318	73.7942	66.9048	22.6733	30.3079	18.9901	6.31285e-14	-1.47022	down
Zjn_sc00009.1.g03130.1.sm.mkhc	1696	1548	1334	535	545	387	40.2155	38.8576	29.8932	12.0838	11.3069	8.82503	8.90912e-12	-1.61076	down
Zjn_sc00009.1.g03210.1.am.mk	75850	108018	98810	21628	40950	29377	3074.86	4623.87	3796.03	852.853	1453.94	1161.32	3.05639e-07	-1.59316	down
Zjn_sc00009.1.g03290.1.sm.mkhc	3652	3092	3751	8100	5768	7436	41.8443	37.9321	40.3898	90.5681	59.2347	84.1125	0.000124482	1.07883	up
Zjn_sc00009.1.g03320.1.sm.mkhc	52	71	107	145	168	149	0.589678	0.858056	1.42664	2.29599	2.05238	2.08411	0.00444294	1.06132	up
Zjn_sc00009.1.g03430.1.sm.mkhc	946	944	716	2510	2374	2444	13.4141	14.1768	9.59903	33.9486	29.4798	33.3948	7.9867e-15	1.52805	up
Zjn_sc00009.1.g03530.1.sm.mk	189	207	332	549	434	549	2.15569	2.41686	3.76367	5.8292	4.33286	6.06734	7.64355e-05	1.14085	up
Zjn_sc00009.1.g03820.1.sm.mkhc	6578	4190	4713	2212	2152	1345	70.2814	47.9078	48.3822	23.1465	20.4472	14.2635	0.000102249	-1.40362	down
Zjn_sc00009.1.g03910.1.sm.mkhc	94	76	110	11	72	27	0.792759	0.675182	0.874728	0.085062	0.529305	0.218236	0.00715821	-1.33799	down
Zjn_sc00009.1.g04030.1.am.mk	63	1272	1438	5370	5735	4732	2.2362	48.401	48.8837	184	180.381	163.723	2.85139e-28	2.56246	up
Zjn_sc00009.1.g04160.1.sm.mkhc	6758	4865	5223	18170	14801	18810	58.9061	48.8387	47.9386	161.431	118.329	173.099	3.55587e-10	1.6716	up
Zjn_sc00009.1.g04230.1.am.mk	153	83	136	16	5	23	4.63223	2.65207	3.88907	0.440877	0.107958	0.652397	2.41898e-09	-2.98959	down
Zjn_sc00009.1.g04270.1.sm.mkhc	1063	822	843	363	349	307	9.69054	6.98542	6.43261	2.8223	2.6369	2.41322	7.24438e-10	-1.37981	down
Zjn_sc00009.1.g04550.1.am.mkhc	23	25	28	134	73	144	0.419426	0.488954	0.495956	2.41341	1.21217	2.63133	0.000266247	2.27374	up
Zjn_sc00009.1.g04580.1.am.mkhc	1084	795	1020	2248	1862	2209	11.3309	8.80805	10.1102	22.3963	17.0455	22.2407	2.61491e-08	1.17953	up
Zjn_sc00009.1.g04630.1.sm.mk	185	187	269	760	523	727	7.41783	7.93328	10.2063	29.1018	18.4008	28.1342	1.76844e-06	1.71484	up
Zjn_sc00009.1.g04640.1.sm.mkhc	217	207	333	527	420	578	5.55913	5.62275	8.08724	12.8884	9.43549	14.2908	0.000537825	1.07883	up
Zjn_sc00009.1.g04680.1.cf.mkhc	165	174	150	37	38	43	1.86588	2.30068	1.74049	0.256065	0.242366	0.307574	1.59621e-07	-2.00923	down
Zjn_sc00009.1.g04980.1.sm.mkhc	369	450	406	1213	1015	945	10.9598	14.1819	11.4071	34.3977	26.4181	27.0856	6.72824e-11	1.41408	up
Zjn_sc00009.1.g05080.1.sm.mk	1677	1959	2476	6059	5176	7413	23.061	28.5306	32.2013	79.4609	62.012	98.2424	1.44843e-06	1.671	up
Zjn_sc00009.1.g05120.1.am.mk	672	468	392	2578	2433	3216	9.79469	7.18163	5.32255	35.9431	31.0166	45.2362	2.35477e-13	2.46955	up
Zjn_sc00009.1.g05190.1.sm.mkhc	12115	14362	9675	1549	1634	851	294.795	363.378	221.837	36.1243	34.8467	19.8052	2.44394e-12	-3.14601	down
Zjn_sc00009.1.g05350.1.sm.mkhc	266	337	229	96	192	86	19.2889	25.8135	15.691	6.61741	12.1569	5.97839	0.0092649	-1.14845	down
Zjn_sc00009.1.g05360.1.sm.mkhc	7356	7396	7412	1905	2247	1795	120.189	128.668	114.629	28.9581	31.5063	27.5881	6.13147e-23	-1.86125	down
Zjn_sc00009.1.g05630.1.sm.mk	663	529	400	181	218	110	29.2153	24.6984	16.669	7.60227	8.37843	4.67016	0.000152174	-1.62696	down
Zjn_sc00009.1.g05640.1.am.mkhc	7662	5015	7384	19566	20422	16001	107.019	73.0686	97.4008	256.653	246.295	212.001	9.07198e-17	1.52822	up
Zjn_sc00009.1.g05670.1.am.mk	19	21	21	73	73	84	0.674495	0.761504	0.682548	2.45896	2.26038	2.87401	0.000203814	1.96197	up
Zjn_sc00009.1.g05680.1.cf.mkhc	396	429	483	1828	1809	2115	26.9912	32.5441	34.5648	130.014	116.843	138.262	2.00895e-24	2.18822	up
Zjn_sc00009.1.g05770.1.am.mk	495	633	578	2405	1469	1183	8.13652	10.9971	8.98839	37.7065	21.1503	18.7433	0.00648753	1.61016	up
Zjn_sc00009.1.g05970.1.sm.mk	51	73	57	5	16	11	2.47038	3.76627	2.60308	0.193502	0.659284	0.513376	9.1633e-05	-2.48391	down
Zjn_sc00009.1.g06110.1.am.mk	558	402	296	1854	1385	1469	7.35398	5.60559	3.68987	23.2746	15.9741	18.6431	3.36649e-10	1.94458	up
Zjn_sc00009.1.g06140.1.sm.mkhc	7003	4973	6863	11883	11699	14686	101.881	76.7241	94.8411	165.396	149.51	206.749	1.27785e-05	1.07994	up
Zjn_sc00009.1.g06240.1.am.mk	66	112	53	7	3	14	1.46321	2.61365	1.11198	0.131032	0.039429	0.295792	0.000312063	-3.2091	down
Zjn_sc00009.1.g06340.1.sm.mkhc	121	105	89	809	481	997	1.90176	1.73743	1.31903	12.155	6.62516	15.1367	2.61552e-05	2.91781	up
Zjn_sc00009.1.g06460.1.sm.mkhc	18765	19121	21088	8931	10461	5866	304.695	333.029	325.147	139.445	149.348	91.636	1.3385e-10	-1.19099	down
Zjn_sc00009.1.g06470.1.sm.mkhc	917	739	653	313	328	169	7.26194	6.1917	4.88753	2.36048	2.26699	1.28618	3.29217e-06	-1.4863	down
Zjn_sc00009.1.g06480.1.sm.mkhc	12386	11731	13491	4518	4391	3888	160.014	133.956	137.487	46.7636	41.7099	37.4389	2.49187e-16	-1.50989	down
Zjn_sc00009.1.g06560.1.am.mk	2491	2637	2678	6271	8931	5241	36.7148	41.3386	38.0548	90.226	118.277	75.608	9.59077e-07	1.41693	up
Zjn_sc00009.1.g06640.1.sm.mkhc	849	641	668	1788	2073	2066	20.01	15.8531	14.9058	40.0407	42.811	46.8022	8.83442e-14	1.49994	up
Zjn_sc00009.1.g06820.1.am.mk	5007	4343	6124	2138	3178	1914	219.999	201.7	259.489	85.6807	120.936	76.0258	2.97341e-08	-1.05998	down
Zjn_sc00009.1.g06940.1.am.mk	101	127	172	54	72	30	1.85101	2.47017	2.97646	0.938871	1.1448	0.517629	0.00104341	-1.32566	down
Zjn_sc00009.1.g07010.1.am.mk	173	255	258	24	35	28	2.99566	4.57733	4.27461	0.392008	0.38714	0.461733	6.43717e-15	-2.94305	down
Zjn_sc00009.1.g07180.1.sm.mk	1946	1533	1295	4801	4808	4198	90.6488	75.6056	57.001	213.156	196	188.327	1.14123e-16	1.56699	up
Zjn_sc00009.1.g07210.1.sm.mk	405	355	319	1320	1344	1276	15.7495	14.5899	11.7083	48.9272	45.7241	47.764	3.97204e-19	1.90705	up
Zjn_sc00009.1.g07360.1.sm.mkhc	119	124	100	338	300	367	3.85344	4.22861	3.06638	10.4351	8.52265	11.4429	1.98774e-08	1.59369	up
Zjn_sc00009.1.g07400.1.am.mk	93	83	33	218	245	343	0.993152	0.944774	0.330276	2.23831	2.3136	3.56407	3.67745e-05	1.9754	up
Zjn_sc00009.1.g07430.1.am.mk	370	446	484	1237	1178	1561	5.52308	7.05026	6.82342	17.6023	15.391	22.4444	2.60503e-08	1.66684	up
Zjn_sc00009.1.g07450.1.sm.mkhc	1787	2035	1426	761	350	299	16.2571	19.2154	12.234	6.55026	2.83672	2.63599	8.7901e-06	-1.85747	down
Zjn_sc00009.1.g07580.1.am.mk	137	99	91	19	28	13	1.38844	1.05987	0.877109	0.180233	0.246954	0.119131	3.3705e-07	-2.42794	down
Zjn_sc00009.1.g07600.1.sm.mkhc	12	10	19	234	194	298	0.104751	0.09336	0.239537	3.11186	2.46439	4.02221	1.09889e-14	4.22171	up
Zjn_sc00009.1.g07810.1.am.mkhc	105	164	132	27	49	16	1.7838	2.96561	2.13496	0.439247	0.732692	0.251592	3.95613e-06	-2.11832	down
Zjn_sc00009.1.g08100.1.sm.mkhc	7563	7194	9024	3186	5178	2765	272.768	276.625	308.264	108.602	163.694	95.7543	2.02117e-08	-1.06498	down
Zjn_sc00009.1.g08130.1.am.mk	26	20	2	63	103	91	0.821512	0.664742	0.044175	1.94509	2.91127	2.84119	2.25513e-06	2.42032	up
Zjn_sc00009.1.g08180.1.sm.mkhc	600	501	737	1405	1179	1482	7.20994	6.2723	8.36513	16.1966	12.3598	17.3365	3.59713e-07	1.20738	up
Zjn_sc00009.1.g08440.1.am.mkhc	1059	967	1269	2733	3176	3517	7.39683	7.204	8.32237	17.5352	18.5938	22.9714	1.0657e-13	1.56956	up
Zjn_sc00009.1.g08450.1.sm.mkhc	420	335	396	1152	1431	1269	7.33419	6.18162	6.58229	19.2318	21.716	21.2196	5.78562e-17	1.7856	up
Zjn_sc00009.1.g08500.1.sm.mk	1129	874	1041	252	284	237	41.5477	34.0463	36.226	8.81835	9.12289	8.36806	5.97953e-18	-1.93493	down
Zjn_sc00009.1.g08600.1.sm.mkhc	60	90	129	764	654	543	0.498569	0.642997	1.013	5.36098	4.17659	4.14551	6.12205e-22	2.86881	up
Zjn_sc00009.1.g08730.1.sm.mkhc	272	198	207	359	695	433	16.3587	12.6152	11.7918	20.6212	36.675	25.1214	0.00418119	1.16023	up
Zjn_sc00009.1.g08780.1.sm.mkhc	867	734	901	1691	1709	2094	11.2494	10.0827	11.0558	20.9188	19.4192	26.1828	1.18371e-07	1.1889	up
Zjn_sc00009.1.g08800.1.sm.mk	186	263	167	33	55	28	7.95432	11.9333	6.75302	1.34357	2.05558	1.13151	4.06592e-06	-2.40028	down
Zjn_sc00009.1.g08830.1.am.mk	190	182	95	27	14	11	4.39589	4.46377	2.0857	0.597224	0.278556	0.233733	8.79724e-06	-3.13812	down
Zjn_sc00009.1.g08950.1.sm.mk	122	78	156	251	341	170	8.79562	5.94196	10.6526	17.2518	21.5494	11.8324	0.00531677	1.14204	up
Zjn_sc00009.1.g09120.1.am.mk	48	35	25	79	139	148	1.04192	0.793284	0.507636	1.64341	2.66774	3.1121	0.000271041	1.79158	up
Zjn_sc00009.1.g09220.1.am.mk	168	114	103	31	42	7	13.019	9.31373	7.56542	2.2428	2.81824	0.470289	1.68398e-05	-2.26208	down
Zjn_sc00009.1.g09230.1.sm.mk	631	652	593	155	224	112	31.1555	34.0669	27.6386	7.27047	9.653	5.32193	1.62987e-14	-1.91309	down
Zjn_sc00009.1.g09240.1.sm.mkhc	1963	2105	3062	5834	5823	4971	31.7559	35.1287	42.0353	85.4688	78.8856	72.8462	1.87205e-11	1.2746	up
Zjn_sc00009.1.g09380.1.sm.mkhc	155	153	176	385	360	422	2.5862	2.7084	2.76793	6.12236	5.25683	6.78914	1.03501e-06	1.32203	up
Zjn_sc00009.1.g09600.1.am.mk	596	515	621	266	300	235	19.5697	17.8806	19.2854	8.32769	8.59975	7.42289	1.20323e-05	-1.07054	down
Zjn_sc00009.1.g09880.1.sm.mk	72	32	30	264	349	376	0.865678	0.407328	0.337893	3.03397	3.70276	4.38179	5.56636e-17	2.92234	up
Zjn_sc00009.1.g09920.1.am.mkhc	1047	917	1075	2252	2119	2240	21.2612	19.7143	20.6321	43.5794	37.655	43.8104	4.76405e-09	1.17114	up
Zjn_sc00009.1.g09960.1.sm.mkhc	121	96	126	221	303	325	1.5403	1.29279	1.51531	2.6732	3.37303	3.97911	5.3141e-06	1.3578	up
Zjn_sc00009.1.g10110.1.sm.mkhc	1484	1681	1407	512	881	391	27.5393	33.0221	24.6844	9.05496	14.2936	6.97949	2.71453e-06	-1.34445	down
Zjn_sc00009.1.g10120.1.am.mkhc	3302	2773	3182	7836	7002	6857	41.9616	37.7765	38.193	95.0644	78.9967	83.6902	9.58353e-12	1.27649	up
Zjn_sc00009.1.g10210.1.sm.mk	2260	2054	1523	713	780	635	26.1288	25.2301	16.5988	7.86547	8.16906	7.05831	1.49948e-05	-1.42675	down
Zjn_sc00009.1.g10340.1.sm.mk	3047	3514	3311	982	1550	782	188.876	230.64	194.061	58.0168	84.0754	46.6474	6.56728e-14	-1.55371	down
Zjn_sc00009.1.g10440.1.sm.mkhc	248	182	185	594	691	728	8.77852	6.81599	6.18899	20.0372	21.4225	24.8152	2.07463e-13	1.75355	up
Zjn_sc00009.1.g10750.1.sm.mkhc	142	155	160	52	93	41	9.8987	11.4621	10.5349	3.43616	5.66962	2.74326	0.000902004	-1.27781	down
Zjn_sc00009.1.g10880.1.am.mk	175	102	50	764	653	774	2.38114	1.46474	0.635279	9.92342	7.78903	10.1553	1.46206e-22	2.77577	up
Zjn_sc00009.1.g10930.1.am.mkhc	2153	2119	2016	823	1005	677	30.4841	32.6805	26.9712	10.8384	12.2296	8.64809	1.43926e-10	-1.29702	down
Zjn_sc00009.1.g11000.1.am.mkhc	4135	2404	4124	8981	9828	9091	54.3665	34.6663	51.4745	112.059	113.478	116.619	1.16481e-14	1.44219	up
Zjn_sc00009.1.g11130.1.am.mk	932	923	484	51	87	70	19.753	20.7139	9.70018	1.02756	1.59603	1.42571	5.87656e-07	-3.47589	down
Zjn_sc00009.1.g11230.1.sm.mkhc	10263	9078	11052	22547	25148	22717	170.395	157.214	155.525	308.445	346.7	339.389	6.83767e-12	1.25796	up
Zjn_sc00009.1.g11310.1.sm.mkhc	647	697	676	1405	1632	1387	5.20288	5.69036	5.03504	11.182	11.7399	10.7649	1.4323e-08	1.16853	up
Zjn_sc00009.1.g11430.1.am.mk	69	94	100	46	24	30	2.47665	3.57709	3.37367	1.55788	0.735887	1.01083	0.00525754	-1.33815	down
Zjn_sc00009.1.g11450.1.sm.mkhc	1830	2439	1803	626	822	680	33.3483	46.8367	30.9425	10.868	13.1704	11.8859	7.34908e-06	-1.48519	down
Zjn_sc00009.1.g11740.1.am.mkhc	2939	3088	2928	1548	1430	1178	24.5753	27.2242	22.9631	12.21	10.3891	9.32306	5.25574e-08	-1.06891	down
Zjn_sc00009.1.g12000.1.am.mk	112	177	153	76	91	43	6.3215	10.6244	8.22296	4.11296	4.49947	2.3427	0.00805262	-1.05174	down
Zjn_sc00009.1.g12030.1.sm.mkhc	186	128	115	255	371	228	4.09276	2.98319	2.38937	5.3478	7.13707	4.81651	0.000918748	1.01705	up
Zjn_sc00010.1.g00250.1.sm.mkhc	1928	1884	2106	4371	4403	4480	36.9465	38.0464	37.8791	79.4741	75.7071	82.2953	2.25501e-10	1.21061	up
Zjn_sc00010.1.g00280.1.sm.mk	245	178	188	560	670	589	7.23056	5.5667	5.23086	15.7571	17.3109	16.7587	2.7234e-11	1.61309	up
Zjn_sc00010.1.g00970.1.am.mk	133	197	82	0	3	0	6.67303	10.4711	3.87646	0	0.100347	0	1.49621e-08	-7.18333	down
Zjn_sc00010.1.g00990.1.sm.mk	549	995	523	23	22	44	12.9975	25.4326	15.1762	0.560136	0.474245	1.09205	7.95532e-07	-4.49587	down
Zjn_sc00010.1.g01020.1.sm.mkhc	90	84	144	305	277	321	4.87796	4.82063	7.36865	15.799	13.1562	16.8016	1.30731e-07	1.57127	up
Zjn_sc00010.1.g01150.1.am.mk	1551	1974	1485	519	944	401	22.0819	29.7664	19.988	7.0401	11.7634	5.49217	0.00013509	-1.41805	down
Zjn_sc00010.1.g01330.1.sm.mk	25	18	23	163	153	114	2.33368	1.78083	2.04773	14.8202	12.8054	10.464	8.86316e-11	2.74775	up
Zjn_sc00010.1.g01340.1.sm.mk	27	20	14	53	60	63	3.33461	2.67747	1.63043	6.32016	6.55564	7.636	0.00745245	1.56188	up
Zjn_sc00010.1.g01410.1.am.mk	488	590	455	77	155	74	11.6063	14.8476	10.239	1.7485	3.21668	1.6934	8.24875e-12	-2.31455	down
Zjn_sc00010.1.g01430.1.sm.mk	115	151	107	51	51	12	1.41138	1.96262	1.23466	0.59505	0.539278	0.132217	0.00023398	-1.70078	down
Zjn_sc00010.1.g01650.1.am.mkhc	8089	5181	8663	17661	16986	20322	154.874	103.97	156.038	321.601	284.869	374.464	1.08297e-09	1.38736	up
Zjn_sc00010.1.g01660.1.sm.mkhc	17	25	23	48	82	64	0.305659	0.479971	0.39324	0.851421	1.32306	1.13623	0.00393392	1.6081	up
Zjn_sc00010.1.g01930.1.sm.mkhc	149	170	166	59	58	89	1.94866	2.34995	2.22887	0.853058	0.686448	1.12046	0.00114906	-1.18154	down
Zjn_sc00010.1.g02000.1.am.mkhc	976	848	907	1980	2016	1812	8.6968	7.99908	7.64194	16.8153	15.7235	15.5637	1.89171e-08	1.13111	up
Zjn_sc00010.1.g02420.1.am.mk	43	53	61	17	11	10	0.616105	0.804892	0.828653	0.232062	0.138464	0.136869	0.00216146	-1.99513	down
Zjn_sc00010.1.g02480.1.am.mk	74	56	52	171	237	199	0.808615	0.640529	0.535688	1.78148	2.27499	2.09935	1.95329e-07	1.77083	up
Zjn_sc00010.1.g03020.1.am.mk	112	92	94	338	273	184	3.52155	3.0612	2.78686	10.1486	7.53256	5.58364	0.000386941	1.45358	up
Zjn_sc00010.1.g03670.1.am.mk	302	178	134	353	515	392	7.73464	4.82682	3.23184	8.62768	11.577	9.69281	0.00109081	1.06144	up
Zjn_sc00010.1.g03690.1.am.mk	75	30	107	290	708	339	1.12878	0.470447	1.52992	4.17925	9.36926	4.92831	0.000707043	2.70484	up
Zjn_sc00010.1.g03780.1.sm.mk	34	26	43	87	77	112	0.426053	0.34159	0.509796	1.0432	0.847976	1.36274	0.0017408	1.49028	up
Zjn_sc00010.1.g04060.1.sm.mkhc	7454	6070	6398	13947	15001	15221	80.1071	69.2547	65.0759	143.29	141.136	157.629	9.65136e-11	1.19276	up
Zjn_sc00010.1.g04170.1.sm.mkhc	4006	3309	4832	9203	8607	9124	46.3662	40.7412	53.2093	101.751	87.4425	101.655	1.40439e-10	1.20565	up
Zjn_sc00010.1.g04290.1.sm.mkhc	22144	25357	20880	6080	7519	3872	949.4	1151.1	846.354	248.413	282.107	159.841	6.14243e-14	-1.94771	down
Zjn_sc00010.1.g04310.1.am.mk	2057	1824	1483	457	490	246	99.1848	93.1309	67.5758	20.9653	20.6535	11.3953	5.64629e-11	-2.14671	down
Zjn_sc00010.1.g04320.1.am.mk	893	723	618	197	222	86	29.752	25.4964	19.4599	6.23762	6.47451	2.75751	5.24794e-09	-2.12723	down
Zjn_sc00010.1.g04340.1.am.mk	28506	25484	14683	2991	2353	1284	816.224	772.624	397.485	81.6365	58.9438	35.3819	2.9396e-07	-3.35342	down
Zjn_sc00010.1.g04840.1.sm.mkhc	137	155	86	232	280	244	1.2006	1.46708	0.571813	1.96318	2.17466	2.08715	0.000641027	1.02178	up
Zjn_sc00011.1.g00030.1.sm.mk	44	39	43	8	3	0	0.924606	0.847154	0.8524	0.152259	0.037317	0	2.97521e-05	-3.47818	down
Zjn_sc00011.1.g00150.1.sm.mkhc	1709	1241	1077	3782	3597	4578	6.11014	4.4575	3.37532	11.9449	10.8313	15.3531	1.16212e-08	1.61472	up
Zjn_sc00011.1.g00570.1.sm.mk	5211	5107	3715	1737	2391	1439	68.4127	70.9907	46.1159	21.7353	27.4672	18.1928	6.93661e-05	-1.31498	down
Zjn_sc00011.1.g00760.1.am.mk	458	376	604	2212	1381	2525	2.6939	2.46015	3.45403	12.4151	6.96554	14.5449	8.12842e-05	2.16373	up
Zjn_sc00011.1.g00780.1.sm.mkhc	608	596	563	1589	1225	2243	3.66577	3.8162	3.20707	9.17961	6.47192	13.0676	0.00292517	1.57462	up
Zjn_sc00011.1.g00880.1.am.mk	94	178	102	7	31	25	1.60979	3.23547	1.50005	0.082532	0.455379	0.403534	0.000941858	-2.56014	down
Zjn_sc00011.1.g00890.1.sm.mkhc	60	57	65	250	185	279	2.72182	2.75475	2.77646	10.8813	7.4087	12.2885	2.77876e-07	2.03118	up
Zjn_sc00011.1.g00950.1.sm.mk	144	227	107	635	513	622	2.63194	4.45958	1.89315	11.8248	8.44494	11.2589	1.3385e-10	1.91659	up
Zjn_sc00011.1.g01010.1.sm.mk	55	51	51	11	8	5	2.58492	2.52358	2.28529	0.487545	0.318191	0.228359	0.000106997	-2.67164	down
Zjn_sc00011.1.g01060.1.sm.mk	887	879	1070	433	132	183	28.4378	29.6165	32.5939	13.1591	3.67044	5.63236	1.66881e-11	-1.85707	down
Zjn_sc00011.1.g01160.1.sm.mkhc	1471	1532	1133	190	386	107	54.4658	60.1559	39.72	6.64629	12.4936	3.71723	1.24508e-11	-2.60054	down
Zjn_sc00011.1.g01170.1.es.mkhc	130	179	127	49	59	30	6.27711	9.15616	5.78177	2.25955	2.4871	1.39514	4.69265e-05	-1.64295	down
Zjn_sc00011.1.g01220.1.am.mk	960	750	702	1483	2842	1635	38.4053	31.7489	26.5308	56.5736	99.554	63.0253	0.00226147	1.3253	up
Zjn_sc00011.1.g01440.1.sm.mkhc	1004	919	1044	2388	1539	1852	7.35556	7.24401	7.212	16.203	9.96487	12.8527	0.00238123	1.01687	up
Zjn_sc00011.1.g01580.1.am.mk	259	362	264	700	767	498	5.48007	8.12345	5.28025	14.1321	14.2252	10.1606	5.71852e-06	1.17455	up
Zjn_sc00011.1.g01840.1.am.mkhc	31251	27683	24315	62800	53104	73282	298.107	278.269	216.493	562.312	435.988	691.722	3.5383e-05	1.23241	up
Zjn_sc00011.1.g01890.1.sm.mk	210	285	151	600	702	1017	2.02044	2.99108	1.40081	5.72734	6.03866	9.47503	0.000245517	1.87736	up
Zjn_sc00011.1.g01920.1.sm.mkhc	1615	1324	1104	305	301	215	20.9168	18.2051	13.5684	3.77312	3.49123	2.72326	1.11335e-10	-2.26949	down
Zjn_sc00011.1.g01990.1.sm.mkhc	736	448	485	123	100	88	23.6116	15.2107	14.6918	3.73154	2.80196	2.70969	4.21565e-07	-2.38077	down
Zjn_sc00011.1.g02110.1.am.mk	521	363	403	969	1013	1135	15.1222	11.1526	11.0519	26.8287	25.761	31.7715	1.24015e-09	1.32371	up
Zjn_sc00011.1.g02130.1.am.mk	289	208	224	612	710	382	4.78854	3.6551	3.51041	9.68309	10.3185	6.10238	0.00027186	1.27027	up
Zjn_sc00011.1.g02160.1.am.mk	1572	1092	1285	2506	3581	1952	43.2057	31.7484	33.3869	65.6226	86.0979	51.665	0.00146936	1.05453	up
Zjn_sc00011.1.g02170.1.am.mk	95	101	81	230	389	250	5.3934	6.05784	4.33139	12.4597	19.3498	13.6668	1.0997e-06	1.67014	up
Zjn_sc00011.1.g02180.1.am.mk	540	401	404	1712	1828	1684	41.1699	32.4152	29.123	124.575	122.123	123.773	4.54177e-22	1.99771	up
Zjn_sc00011.1.g02190.1.am.mk	71	57	64	357	279	317	4.53227	3.83414	3.86489	21.7069	15.5812	19.491	8.42836e-15	2.36265	up
Zjn_sc00011.1.g02280.1.sm.mkhc	1015	709	951	1939	2011	2097	11.0893	8.29389	9.21296	20.7261	19.227	19.3961	1.14215e-09	1.2283	up
Zjn_sc00011.1.g02350.1.sm.mkhc	104	118	99	515	548	555	2.7908	3.34966	2.50627	13.1622	12.875	14.3391	8.15136e-20	2.37171	up
Zjn_sc00011.1.g02410.1.sm.mkhc	125	123	92	50	43	8	3.3626	3.50897	2.34301	1.28137	0.990585	0.191852	9.78048e-05	-1.73871	down
Zjn_sc00011.1.g02490.1.sm.mk	171	184	257	83	98	51	5.55682	6.34514	7.90784	2.55431	2.77418	1.59417	5.99984e-05	-1.36029	down
Zjn_sc00011.1.g02510.1.sm.mkhc	4542	5996	5553	1097	1510	1177	75.5531	105.604	87.3438	17.3885	21.9722	18.8524	5.1901e-16	-2.05557	down
Zjn_sc00011.1.g02610.1.am.mk	1296	1287	534	53	88	60	18.473	19.4404	7.22923	0.715993	1.09067	0.820879	1.42155e-05	-3.94865	down
Zjn_sc00011.1.g02640.1.sm.mk	178	213	160	327	502	371	3.28261	4.16671	2.78441	5.75719	8.1092	6.60417	1.14974e-05	1.14635	up
Zjn_sc00011.1.g02660.1.am.mk	225	206	170	47	47	32	2.63468	2.22922	2.22371	0.545554	0.618759	0.519783	6.69059e-10	-2.2247	down
Zjn_sc00011.1.g02730.1.sm.mk	181	131	175	653	997	551	6.58805	5.05873	6.02733	22.6915	31.8181	19.3514	2.3628e-08	2.20868	up
Zjn_sc00011.1.g02740.1.sm.mkhc	1765	1472	2178	4581	3523	3259	17.9985	16.2372	20.8511	43.0473	30.9479	32.0239	3.58846e-05	1.12564	up
Zjn_sc00011.1.g02850.1.sm.mkhc	1505	985	1489	3618	3590	3462	15.4245	10.8302	14.5659	35.5468	32.5054	34.527	2.48302e-14	1.47656	up
Zjn_sc00011.1.g03140.1.am.mk	582	651	633	1910	2006	2096	6.69005	7.92656	6.8788	20.944	20.1998	23.2304	1.05496e-17	1.73152	up
Zjn_sc00011.1.g03210.1.sm.mkhc	5953	5233	7354	2536	2889	2463	124.937	120.089	154.449	55.925	53.6309	49.8887	2.57201e-10	-1.1839	down
Zjn_sc00011.1.g03230.1.am.mk	4375	3594	3383	11213	10053	13174	47.4073	41.3977	34.7272	115.927	95.3149	137.523	3.80975e-09	1.64945	up
Zjn_sc00011.1.g03340.1.sm.mkhc	1535	1669	1360	499	554	272	42.9211	49.3427	35.6757	11.011	13.432	7.07184	4.08382e-11	-1.76292	down
Zjn_sc00011.1.g03840.1.am.mk	105	118	68	0	10	0	3.16015	3.69312	1.90053	0	0.253783	0	3.86906e-11	-4.93585	down
Zjn_sc00011.1.g03920.1.am.mkhc	569	500	491	256	252	198	5.75322	5.35128	4.69568	2.46715	2.22706	1.92159	1.09618e-05	-1.10644	down
Zjn_sc00011.1.g03990.1.sm.mkhc	105	138	115	621	509	627	1.04864	1.51865	1.59013	8.49975	6.42328	8.28153	5.85558e-18	2.33994	up
Zjn_sc00011.1.g04050.1.am.mk	30	20	34	114	90	72	0.742166	0.507905	0.777829	2.68633	1.95723	1.72599	0.000228581	1.77224	up
Zjn_sc00011.1.g04240.1.sm.mkhc	218	271	214	65	168	20	4.28904	5.65423	3.98407	1.21238	2.89858	0.362269	0.00615097	-1.49069	down
Zjn_sc00011.1.g04300.1.sm.mkhc	396	407	588	219	245	172	15.5571	16.9237	21.8577	8.18885	8.41877	6.49536	2.53988e-05	-1.08218	down
Zjn_sc00011.1.g04330.1.sm.mkhc	207	190	242	96	97	73	2.22464	2.23971	2.5262	0.891279	0.877748	0.689446	0.000219888	-1.2198	down
Zjn_sc00011.1.g04490.1.am.mk	16775	16320	19739	46652	46241	37512	278.414	289.117	308.745	738.445	673.53	596.487	1.35872e-13	1.34848	up
Zjn_sc00011.1.g04520.1.sm.mk	324	184	147	533	624	472	15.6784	9.41025	6.71715	24.5989	26.4749	22.0385	9.77391e-08	1.34238	up
Zjn_sc00011.1.g04750.1.am.mk	2309	4597	4586	929	1549	1050	35.9188	75.7168	67.4569	13.7634	21.0866	15.7297	0.00158055	-1.67298	down
Zjn_sc00011.1.g04920.1.am.mk	463	489	574	1552	2203	1247	7.84239	8.77183	9.1807	25.0526	32.6587	20.3432	1.17041e-07	1.74475	up
Zjn_sc00011.1.g04970.1.sm.mk	454	229	219	1562	1400	1481	16.997	9.08796	7.74927	55.7707	45.9002	53.4289	9.58036e-28	2.34255	up
Zjn_sc00011.1.g05000.1.sm.mkhc	2059	2092	1957	1019	963	968	40.4821	44.3077	37.6878	18.8486	16.6555	18.1532	6.04278e-07	-1.00783	down
Zjn_sc00011.1.g05010.1.am.mk	692	666	673	3749	2694	4722	9.98896	10.2115	9.20835	51.9612	34.2092	65.9119	3.08083e-06	2.51766	up
Zjn_sc00011.1.g05190.1.am.mkhc	2669	1814	2241	6173	6366	6893	34.8735	25.0168	28.1508	71.3044	65.1705	76.3537	4.61484e-17	1.58092	up
Zjn_sc00011.1.g05300.1.am.mk	71	85	49	20	10	12	1.13206	1.44571	0.74345	0.298543	0.136753	0.173275	0.000102506	-2.24959	down
Zjn_sc00011.1.g05490.1.sm.mk	343	381	205	9	22	10	23.7073	27.9162	13.418	0.540829	1.31163	0.63214	4.70077e-10	-4.50529	down
Zjn_sc00011.1.g05610.1.am.mk	53	56	49	24	6	17	1.38361	1.56343	1.20814	0.585217	0.116251	0.417244	0.0072935	-1.683	down
Zjn_sc00011.1.g05620.1.am.mk	479	471	412	140	166	62	14.1949	14.7639	11.4061	3.94324	4.26062	1.76059	4.44354e-12	-1.87037	down
Zjn_sc00011.1.g05880.1.am.mk	156	128	82	27	15	22	14.2308	12.3858	7.06223	2.34169	1.12817	1.89917	1.97993e-05	-2.47204	down
Zjn_sc00011.1.g05900.1.am.mk	2818	2276	3581	5815	5622	5773	63.917	54.9415	77.1052	126.229	111.965	126.564	4.95918e-08	1.04645	up
Zjn_sc00011.1.g05910.1.sm.mkhc	114	92	68	202	256	235	1.43911	1.23186	0.817205	2.44659	2.84122	2.87261	1.41139e-05	1.36887	up
Zjn_sc00011.1.g06260.1.am.mk	4122	8099	6894	12815	12853	13722	34.6457	96.0068	65.6036	122.242	118.579	135.661	3.79006e-06	1.08436	up
Zjn_sc00011.1.g06400.1.sm.mk	105	76	88	307	310	310	5.58302	4.29325	4.44998	15.6645	14.5216	15.9457	6.07492e-10	1.83154	up
Zjn_sc00011.1.g06760.1.sm.mkhc	260	376	301	732	715	421	7.47834	11.4536	8.17243	20.068	18.0031	11.6735	0.0042665	1.02188	up
Zjn_sc00011.1.g06830.1.sm.mkhc	5812	5665	5151	2162	3132	2455	87.1288	89.9024	72.9951	30.8581	41.1032	35.4064	2.3628e-08	-1.07057	down
Zjn_sc00011.1.g06990.1.am.mk	259	239	179	102	148	76	3.25726	3.17297	2.12904	1.21976	1.61969	0.909957	0.0033171	-1.03882	down
Zjn_sc00011.1.g07050.1.am.mk	476	469	304	1443	1298	931	6.53981	6.83924	3.95894	18.9804	15.7396	12.5021	3.11982e-07	1.58095	up
Zjn_sc00011.1.g07150.1.sm.mkhc	7883	6167	7152	14039	14816	14931	95.4032	79.0219	81.8315	161.933	156.924	174.013	3.64921e-09	1.09308	up
Zjn_sc00011.1.g07330.1.sm.mk	94	94	133	31	46	24	2.00877	2.13493	2.70528	0.618207	0.850641	0.493582	0.000299209	-1.63253	down
Zjn_sc00011.1.g07360.1.am.mkhc	791	621	738	1516	1265	1476	8.07287	6.78203	7.02995	14.7788	11.3348	15.3363	8.04629e-07	1.03847	up
Zjn_sc00011.1.g07760.1.am.mk	495	457	694	1656	1735	1544	8.97973	8.79246	11.9133	28.6717	27.5863	27.0224	2.56867e-15	1.63795	up
Zjn_sc00011.1.g07780.1.sm.mkhc	57	222	209	445	432	467	3.15369	4.53289	3.29817	4.87366	4.88519	6.18856	1.19933e-06	1.50817	up
Zjn_sc00011.1.g07790.1.sm.mkhc	31	20	19	56	68	96	0.620701	0.422979	0.348729	1.06844	1.18572	1.84764	0.00133586	1.70001	up
Zjn_sc00011.1.g08000.1.am.mk	101	156	215	404	420	402	2.00669	3.33815	4.06392	7.77502	7.38614	7.78837	9.6552e-08	1.43236	up
Zjn_sc00011.1.g08070.1.cf.mkhc	633	638	643	1819	1800	2214	4.08096	5.13707	4.75031	10.9162	10.7971	13.4269	4.18026e-12	1.6565	up
Zjn_sc00011.1.g08140.1.am.mk	568	539	532	175	301	220	9.52907	9.56993	8.43947	2.79597	4.41564	3.54383	1.49836e-06	-1.20586	down
Zjn_sc00011.1.g08260.1.cf-es.mkhc	52	96	34	212	137	204	0.477025	0.94701	0.293296	1.87704	1.1119	1.82315	0.000668647	1.62957	up
Zjn_sc00011.1.g08430.1.sm.mkhc	70	67	163	247	175	201	0.87571	0.888708	1.92889	2.9491	1.92422	2.42971	0.00747739	1.13442	up
Zjn_sc00011.1.g08740.1.am.mk	1018	1078	1010	2337	1729	2029	31.308	35.1146	29.3764	68.5196	46.5418	60.1061	3.83687e-05	1.02042	up
Zjn_sc00012.1.g00060.1.sm.mkhc	3181	3472	2151	628	941	536	40.3339	46.6023	25.779	7.58002	10.4413	6.53508	8.74389e-06	-2.05221	down
Zjn_sc00012.1.g00310.1.sm.mkhc	108	93	147	288	289	363	1.73023	1.26672	2.05798	3.51689	3.49706	4.39046	3.12897e-07	1.49689	up
Zjn_sc00012.1.g00330.1.sm.mk	139	113	95	187	310	300	3.99309	3.43548	2.56719	5.12035	7.79931	8.31279	0.000452452	1.23238	up
Zjn_sc00012.1.g00600.1.am.mk	11	9	23	74	53	77	0.113917	0.10352	0.23008	0.75922	0.499814	0.806634	6.49733e-05	2.33138	up
Zjn_sc00012.1.g00610.1.am.mk	17	16	12	81	54	72	0.422989	0.420696	0.264705	1.91759	1.16963	1.72115	7.34707e-05	2.2462	up
Zjn_sc00012.1.g00620.1.sm.mk	97	137	166	440	447	571	2.73806	4.10424	4.44808	11.9084	11.1231	15.6101	5.53733e-10	1.92317	up
Zjn_sc00012.1.g00640.1.sm.mk	286	361	473	106	146	167	5.3217	7.11547	8.32776	1.87512	2.38025	2.99365	9.37529e-06	-1.36387	down
Zjn_sc00012.1.g00720.1.am.mkhc	36851	38067	29473	8537	10795	6247	443.793	482.553	336.932	99.2809	114.215	72.1152	1.02672e-11	-2.00797	down
Zjn_sc00012.1.g00900.1.sm.mkhc	104	137	143	353	365	365	1.67532	2.35468	2.18878	5.4641	5.18111	5.69889	2.81403e-08	1.54147	up
Zjn_sc00012.1.g00920.1.am.mk	221	186	153	1047	696	750	2.75276	2.44792	1.73993	12.3865	7.54498	8.94978	5.86035e-08	2.19711	up
Zjn_sc00012.1.g00960.1.am.mk	94	97	61	327	364	256	1.71703	1.96711	1.07209	5.69766	5.93256	4.88854	4.10252e-11	1.9311	up
Zjn_sc00012.1.g01130.1.sm.mkhc	2400	1552	2334	5218	4210	5036	36.4902	24.9853	33.5488	75.6058	56.016	73.727	1.3497e-07	1.26212	up
Zjn_sc00012.1.g01140.1.am.mkhc	568	443	604	1187	1141	1472	7.25137	5.66955	6.94349	14.4332	12.9653	18.3696	9.23223e-07	1.29308	up
Zjn_sc00012.1.g01180.1.am.mk	271	181	167	47	97	46	5.58142	3.94493	3.24235	0.907565	1.73277	0.903305	0.000352789	-1.69023	down
Zjn_sc00012.1.g01230.1.am.mkhc	22	8	14	74	59	68	0.316107	0.118713	0.18487	1.01598	0.734911	0.930471	0.000101772	2.25001	up
Zjn_sc00012.1.g01280.1.sm.mkhc	44764	38172	47201	105641	119130	103261	509.21	464.589	511.963	1156.18	1198.58	1136.83	3.13052e-14	1.3789	up
Zjn_sc00012.1.g01780.1.am.mk	4548	5110	4545	1119	1426	1093	140.45	167.097	132.711	32.9148	38.5209	32.4898	1.26211e-23	-1.93352	down
Zjn_sc00012.1.g01850.1.sm.mkhc	817	807	761	2356	1898	1576	11.6777	12.5132	10.8064	33.6185	25.1867	22.5496	1.97439e-06	1.32951	up
Zjn_sc00012.1.g02360.1.am.mkhc	709	698	689	270	343	281	8.89825	8.9185	7.36634	3.17352	3.63864	3.20877	4.27149e-07	-1.19331	down
Zjn_sc00012.1.g02430.1.sm.mk	40	69	68	535	442	501	1.19241	2.18825	1.93982	15.4399	11.7132	14.6058	2.85139e-28	3.11104	up
Zjn_sc00012.1.g02490.1.sm.mkhc	395	419	500	1177	1086	958	6.76119	7.39663	8.0909	19.2394	16.3116	15.7358	6.27285e-10	1.34114	up
Zjn_sc00012.1.g02500.1.am.mk	434	327	335	1106	1093	926	9.80254	7.81461	7.14804	23.7938	21.5915	20.1251	1.07916e-12	1.55123	up
Zjn_sc00012.1.g02710.1.sm.mkhc	3775	2633	3254	7067	6797	7219	41.5564	30.8473	33.8896	74.1536	65.5933	76.6405	4.14652e-10	1.17586	up
Zjn_sc00012.1.g02830.1.am.mk	79	88	76	39	0	0	4.72996	5.60845	4.35386	2.2017	0	0	3.04479e-06	-2.57282	down
Zjn_sc00012.1.g02870.1.sm.mkhc	1966	2050	1953	669	732	491	34.7864	37.712	32.1539	10.7118	11.022	8.12005	1.46043e-15	-1.62525	down
Zjn_sc00012.1.g03060.1.sm.mkhc	1467	888	1002	663	257	400	34.4962	22.109	22.2662	14.8367	5.27725	9.04652	0.00635297	-1.28569	down
Zjn_sc00012.1.g03160.1.sm.mkhc	566	622	634	149	167	101	7.65892	9.00011	8.02517	1.94263	1.83742	1.29697	9.67677e-17	-2.09519	down
Zjn_sc00012.1.g03310.1.am.mk	896	1334	793	251	189	65	35.0114	55.1687	29.2676	9.34354	6.4457	2.43585	2.27617e-05	-2.56724	down
Zjn_sc00012.1.g03330.1.es.mkhc	569	620	529	239	254	205	19.2239	22.196	16.8963	7.69592	7.50986	6.6509	2.98179e-07	-1.26608	down
Zjn_sc00012.1.g03920.1.sm.mkhc	659	801	867	342	327	363	4.87124	6.26589	6.12462	2.42117	2.15328	2.6302	8.70266e-07	-1.12333	down
Zjn_sc00012.1.g04100.1.am.mk	110	151	52	5	6	5	1.3405	1.92085	0.489141	0.046043	0.057073	0.03926	0.000132454	-4.28087	down
Zjn_sc00012.1.g04130.1.am.mk	73	64	51	341	353	285	1.00199	0.919007	0.652459	4.4706	4.24669	3.77369	1.14826e-15	2.41192	up
Zjn_sc00012.1.g04140.1.sm.mk	508	482	274	188	185	40	4.98817	5.00986	2.47793	1.75499	1.55083	0.352337	0.00832372	-1.61041	down
Zjn_sc00012.1.g04390.1.am.mk	1675	1496	1374	3569	3570	3251	35.0541	33.1516	27.1798	71.17	65.3772	65.5144	1.36602e-10	1.23131	up
Zjn_sc00012.1.g04480.1.sm.mkhc	445	481	421	1381	1311	1353	9.43757	10.8108	8.48641	27.9835	24.3845	27.7165	1.05004e-14	1.62721	up
Zjn_sc00012.1.g04530.1.sm.mkhc	9648	7783	11872	21414	22584	21288	227.601	192.368	266.386	486.493	469.466	484.196	6.01781e-11	1.21001	up
Zjn_sc00012.1.g04900.1.am.mkhc	348	354	337	896	807	833	3.34693	3.60304	3.05772	8.21656	6.80943	7.91752	3.26746e-09	1.3311	up
Zjn_sc00012.1.g05510.1.am.mk	362	307	419	86	56	62	6.2502	5.61135	6.83491	1.4046	0.834413	1.02206	8.98092e-16	-2.35614	down
Zjn_sc00012.1.g05590.1.sm.mkhc	168	165	122	69	78	69	4.83008	5.02585	3.31654	1.88744	1.94846	1.88716	0.00597032	-1.04433	down
Zjn_sc00012.1.g05790.1.sm.mkhc	743	716	702	1340	1840	1365	16.6181	16.9386	14.8338	28.5539	36.0001	29.3822	6.65524e-08	1.10503	up
Zjn_sc00012.1.g05800.1.sm.mk	134	156	151	671	518	423	1.78991	2.21521	1.91335	8.59347	6.09087	5.46457	1.08496e-07	1.9115	up
Zjn_sc00012.1.g05950.1.am.mkhc	134	101	138	226	301	258	4.59767	3.68136	4.49991	7.41273	9.09162	8.5703	0.00022456	1.1191	up
Zjn_sc00012.1.g06110.1.am.mk	1001	791	877	1938	3093	2061	38.2058	31.9533	31.6366	70.5039	103.31	75.7353	3.20799e-07	1.44098	up
Zjn_sc00012.1.g06300.1.sm.mk	89	67	43	9	22	8	4.84451	3.82258	2.19053	0.421293	1.01688	0.377363	0.000451538	-2.3548	down
Zjn_sc00012.1.g06340.1.am.mkhc	1153	1235	942	306	363	188	15.5907	17.6627	12.0284	3.94825	4.31794	2.4204	3.31236e-10	-1.93882	down
Zjn_sc00012.1.g06650.1.sm.mk	725	799	765	1468	1905	1360	94.8241	110.685	94.5799	183.073	218.211	171.411	1.13202e-07	1.0799	up
Zjn_sc00012.1.g06840.1.sm.mkhc	39	27	68	205	122	232	0.425463	0.314844	0.709044	2.15673	1.1788	2.46566	0.000371828	2.15019	up
Zjn_sc00012.1.g07050.1.sm.mk	263	199	346	121	95	157	4.10082	3.29646	5.10903	1.80292	1.30063	2.36297	0.00127768	-1.04168	down
Zjn_sc00012.1.g07110.1.sm.mkhc	349	283	173	23	17	19	3.95854	3.40112	1.85852	0.248582	0.168409	0.199358	9.43651e-08	-3.7352	down
Zjn_sc00012.1.g07300.1.am.mk	1945	2149	1819	811	1042	691	25.0269	29.3101	22.1582	9.94325	11.7483	8.5585	6.75334e-09	-1.19033	down
Zjn_sc00012.1.g07510.1.am.mk	316	340	456	165	143	121	8.07877	9.19392	11.0211	4.02431	3.19203	2.98403	1.41658e-06	-1.32258	down
Zjn_sc00012.1.g07870.1.am.mkhc	134	149	131	422	368	600	1.45231	1.1832	1.06074	3.16244	2.48614	4.04534	0.000149797	1.79985	up
Zjn_sc00012.1.g08010.1.sm.mkhc	6338	8583	5444	2131	2000	1564	136.268	135.514	110.719	30.2709	37.5561	32.3754	5.82929e-05	-1.81288	down
Zjn_sc00012.1.g08020.1.sm.mk	239	185	212	89	86	54	4.2073	3.44517	3.52249	1.48252	1.32343	0.910075	1.80326e-05	-1.43639	down
Zjn_sc00012.1.g08170.1.am.mk	30	32	21	60	71	82	0.568033	0.649804	0.384652	1.11195	1.20596	1.53944	0.00796671	1.39315	up
Zjn_sc00012.1.g08180.1.am.mkhc	41	21	45	78	103	138	1.22918	0.665115	1.27458	2.23354	2.70992	3.99438	0.00107323	1.64441	up
Zjn_sc00012.1.g08450.1.sm.mkhc	166	89	108	258	284	287	4.54102	2.57573	2.79144	6.75216	6.82639	7.58345	3.33957e-05	1.23712	up
Zjn_sc00012.1.g08570.1.am.mk	193	154	162	59	55	34	3.50412	2.96046	2.76914	1.0183	0.862098	0.589614	2.68374e-06	-1.74699	down
Zjn_sc00012.1.g08800.1.am.mkhc	636	423	661	1046	1079	1405	9.15802	6.4544	8.98534	14.3519	14.9026	19.4868	0.000288028	1.09885	up
Zjn_sc00012.1.g08850.1.sm.mkhc	2895	2340	2789	6228	6335	7967	27.0741	23.4611	25.0127	56.2098	52.5248	66.0504	5.58431e-08	1.40887	up
Zjn_sc00012.1.g08860.1.am.mk	41	28	29	125	128	112	0.724019	0.526242	0.475462	2.12584	1.99465	1.91826	5.22328e-06	1.93691	up
Zjn_sc00012.1.g08880.1.sm.mkhc	35	20	49	64	97	125	0.42151	0.255632	0.565983	0.744877	1.03966	1.47454	0.00585995	1.53175	up
Zjn_sc00012.1.g08920.1.am.mk	1659	1491	1320	529	576	388	24.7466	23.8261	18.2864	7.25428	7.65118	5.7521	4.33592e-12	-1.55219	down
Zjn_sc00012.1.g09000.1.am.mk	104	90	117	40	45	31	1.7921	1.64111	1.89535	0.653188	0.673715	0.507195	0.00213572	-1.3811	down
Zjn_sc00012.1.g09060.1.sm.mkhc	203	205	146	69	79	40	6.8436	7.31766	4.65534	2.20217	2.31638	1.28158	2.23319e-05	-1.54163	down
Zjn_sc00012.1.g09090.1.sm.mk	765	612	495	1716	1703	1418	11.2005	9.49599	6.86163	23.9582	21.8246	20.0177	5.81639e-12	1.4023	up
Zjn_sc00012.1.g09270.1.am.mk	98	93	102	0	0	59	0.9483	0.951998	0.934145	0	0	0.542778	0.000262762	-2.19775	down
Zjn_sc00012.1.g09440.1.sm.mkhc	4356	3179	3768	9518	8187	10133	32.0044	24.7766	25.3025	64.1404	51.9488	69.88	4.22565e-09	1.35395	up
Zjn_sc00012.1.g09470.1.sm.mkhc	114429	111763	111973	39874	44912	41173	840.485	872.789	779.046	279.824	294.422	298.174	2.69583e-14	-1.38442	down
Zjn_sc00012.1.g09510.1.sm.mkhc	2441	2350	2192	889	1014	618	78.904	80.432	67.0033	27.3568	28.6765	19.2414	7.09109e-13	-1.44094	down
Zjn_sc00012.1.g09640.1.am.mk	2578	2872	1752	549	548	285	70.2303	82.2223	44.7487	14.0395	12.886	7.33073	1.50484e-06	-2.36563	down
Zjn_sc00012.1.g09690.1.sm.mk	47	22	16	72	103	95	2.25334	1.10719	0.683291	3.24967	4.28502	4.38538	0.000368467	1.69606	up
Zjn_sc00012.1.g09710.1.sm.mkhc	13899	13380	12664	4871	6115	5160	341.234	343.913	293.083	114.878	131.41	121.696	7.3923e-12	-1.27131	down
Zjn_sc00012.1.g09780.1.sm.mk	82	133	207	26	52	0	3.26572	5.63661	7.86091	0.984319	1.79816	0	0.00139556	-2.43096	down
Zjn_sc00012.1.g09930.1.am.mk	1763	1882	939	251	236	139	15.6903	15.8135	7.05157	2.11927	1.62904	1.17104	2.41628e-05	-2.85808	down
Zjn_sc00012.1.g09960.1.sm.mkhc	515	480	555	982	1005	1017	6.53643	6.40455	6.66842	11.8428	11.51	13.0238	5.0183e-06	1.00259	up
Zjn_sc00012.1.g10030.1.am.mk	107	105	198	66	45	38	1.27693	1.32007	2.23206	0.745062	0.469665	0.428099	0.00392004	-1.39456	down
Zjn_sc00012.1.g10390.1.sm.mk	429	300	504	751	753	938	5.86307	4.34595	6.52095	9.79893	9.01699	12.3627	6.21629e-05	1.04935	up
Zjn_sc00012.1.g10430.1.sm.mk	11	10	7	44	67	63	0.498314	0.471962	0.296231	1.93024	2.71712	2.78401	3.04613e-05	2.66341	up
Zjn_sc00012.1.g10620.1.sm.mkhc	1952	1992	2103	1019	1146	782	29.7775	32.258	30.4738	14.8317	15.3659	11.4387	8.77381e-07	-1.00145	down
Zjn_sc00012.1.g10700.1.sm.mk	1120	1547	1300	604	680	242	70.4841	103.064	77.362	36.2215	37.4563	14.6647	0.000221794	-1.36106	down
Zjn_sc00013.1.g00360.1.am.mkhc	7677	7469	8166	1638	1858	915	66.3321	70.1181	69.8002	13.1474	13.7159	7.54202	2.98304e-35	-2.37197	down
Zjn_sc00013.1.g00540.1.am.mk	28	11	20	67	61	49	0.38107	0.153382	0.247659	0.872115	0.730466	0.638739	0.00568382	1.63624	up
Zjn_sc00013.1.g00830.1.sm.mkhc	1783	1284	1759	3581	3892	4727	39.7199	31.2156	37.759	76.5295	76.3733	100.642	9.37448e-08	1.39387	up
Zjn_sc00013.1.g01080.1.sm.mkhc	1987	1554	1676	3126	3596	3770	45.9361	36.946	36.7624	69.2561	76.2038	80.3484	5.33184e-08	1.05283	up
Zjn_sc00013.1.g01220.1.am.mk	392	355	404	157	229	131	5.92902	5.67186	5.76748	2.25912	3.03218	1.89705	4.23816e-05	-1.12455	down
Zjn_sc00013.1.g01340.1.am.mk	1193	1054	1538	380	648	309	32.4574	30.433	39.6982	9.79229	15.4011	7.94503	1.97062e-09	-1.46936	down
Zjn_sc00013.1.g01450.1.sm.mkhc	1766	1915	1957	868	1154	549	76.7789	88.153	80.417	35.9415	43.8834	22.9485	7.93279e-08	-1.10793	down
Zjn_sc00013.1.g01580.1.sm.mk	228	322	297	134	102	69	4.02857	6.16697	5.0244	2.35187	1.62359	1.21708	6.32144e-06	-1.43631	down
Zjn_sc00013.1.g01760.1.sm.mkhc	275	311	242	63	110	25	9.15941	10.9848	7.61687	1.98581	3.20875	0.779413	1.68821e-08	-2.06494	down
Zjn_sc00013.1.g01880.1.sm.mk	2590	2766	2805	1281	1338	666	110.087	124.447	112.714	51.8741	49.7526	27.2215	9.69839e-11	-1.28344	down
Zjn_sc00013.1.g01920.1.sm.mk	4481	4835	4519	1461	1998	1059	83.4499	95.1096	79.8289	25.2134	32.3633	18.684	1.5655e-16	-1.59079	down
Zjn_sc00013.1.g02100.1.sm.mkhc	29	43	58	154	204	388	0.49767	0.789724	0.970987	2.59282	3.1606	6.60885	0.00799529	2.59156	up
Zjn_sc00013.1.g02370.1.sm.mkhc	36	47	66	253	207	190	0.309126	0.426403	0.538728	2.10082	1.57621	1.59091	2.38211e-10	2.1817	up
Zjn_sc00013.1.g02450.1.am.mk	64	92	56	10	12	9	0.649153	1.01002	0.570946	0.092849	0.105657	0.08412	4.14494e-06	-2.75336	down
Zjn_sc00013.1.g02480.1.sm.mkhc	163	199	130	307	377	329	3.67303	4.74994	2.77264	6.60112	7.45024	7.15501	9.76554e-05	1.06777	up
Zjn_sc00013.1.g02680.1.am.mk	45	54	97	241	157	160	0.423106	0.529084	0.861127	2.15845	1.28592	1.44756	0.000442361	1.57888	up
Zjn_sc00013.1.g02790.1.sm.mkhc	1555	1448	1489	4009	4877	4178	57.4794	56.6612	52.0433	141.256	157.823	148.773	9.80564e-17	1.57876	up
Zjn_sc00013.1.g02830.1.am.mk	10	46	34	126	107	193	0.740175	3.87807	2.53529	9.66805	7.51207	15.0187	0.000424114	2.29315	up
Zjn_sc00013.1.g03210.1.sm.mkhc	258	293	242	1128	889	1117	2.86718	3.45696	2.54226	11.9796	8.73424	12.0016	3.1986e-13	2.0277	up
Zjn_sc00013.1.g03240.1.sm.mk	1083	1267	865	255	256	147	19.3502	23.9086	14.5269	4.30175	3.96905	2.47684	1.53332e-08	-2.26795	down
Zjn_sc00013.1.g03400.1.am.mk	214	366	364	85	82	92	6.30144	11.4249	10.1516	2.36693	2.10168	2.60722	1.701e-05	-1.81782	down
Zjn_sc00013.1.g03410.1.am.mk	1589	1891	1363	780	647	805	12.2807	15.5645	9.88838	5.61158	3.89047	5.82057	0.000451003	-1.0771	down
Zjn_sc00013.1.g03730.1.sm.mkhc	95	75	99	241	220	265	2.23719	1.83996	2.18668	5.35326	4.47406	5.95235	2.71694e-06	1.48873	up
Zjn_sc00013.1.g03860.1.am.mk	153	152	157	46	68	71	4.91822	5.18185	4.78904	1.39278	1.90624	2.20713	0.00066784	-1.27797	down
Zjn_sc00013.1.g03900.1.am.mk	1541	1209	1480	2851	2666	3442	32.3463	26.7597	29.2842	59.2202	50.8731	72.9398	5.33752e-06	1.13809	up
Zjn_sc00013.1.g04030.1.sm.mkhc	1929	1981	2166	4444	3513	4495	26.1531	28.4357	27.7681	57.4336	41.6915	58.6973	5.32911e-06	1.08925	up
Zjn_sc00013.1.g04300.1.sm.mkhc	181	135	157	413	426	372	5.17364	4.08512	4.2417	11.2594	10.6708	10.2377	1.58201e-07	1.39984	up
Zjn_sc00013.1.g04370.1.sm.mkhc	3532	2810	2448	9114	10177	10084	37.478	30.0767	23.2563	90.5587	92.9846	101.321	8.69523e-22	1.77825	up
Zjn_sc00013.1.g04480.1.am.mk	2164	2181	2988	4829	4662	4853	18.5224	19.6107	24.0996	39.4445	35.0757	39.8613	1.12566e-07	1.02325	up
Zjn_sc00013.1.g04510.1.am.mk	1207	1219	780	216	408	154	32.7221	34.8933	19.9817	5.50669	9.59265	3.76864	1.86202e-05	-2.04212	down
Zjn_sc00013.1.g04830.1.sm.mkhc	690	635	719	376	371	196	34.0223	33.1695	33.5437	17.6636	16.0144	9.30452	5.33991e-06	-1.08174	down
Zjn_sc00013.1.g04930.1.am.mkhc	168	181	194	89	92	68	4.15824	4.74843	4.54786	2.10271	1.99467	1.62422	0.00200947	-1.08581	down
Zjn_sc00013.1.g05070.1.sm.mkhc	263	233	241	464	467	522	3.9149	3.67431	3.40534	6.5743	6.09495	7.44231	5.05142e-05	1.02604	up
Zjn_sc00013.1.g05400.1.sm.mk	1744	1897	1303	324	534	227	120.784	139.132	85.347	21.3382	32.3298	15.1393	7.21407e-08	-2.18073	down
Zjn_sc00013.1.g05530.1.sm.mkhc	1273	1239	1302	358	401	325	15.3441	15.7009	14.8161	4.08565	4.30014	3.81101	1.53586e-16	-1.77591	down
Zjn_sc00013.1.g05710.1.sm.mk	1318	1239	1149	598	397	405	13.4241	13.3636	11.0614	5.80447	3.53417	3.97137	1.62024e-10	-1.35905	down
Zjn_sc00013.1.g05800.1.sm.mk	48	63	49	11	16	0	1.55458	2.15721	1.49582	0.312511	0.453123	0	0.000179448	-2.57797	down
Zjn_sc00013.1.g05980.1.sm.mkhc	12206	12424	13056	4579	4922	3693	418.699	449.638	423.15	150.206	148.241	122.497	1.53647e-15	-1.47618	down
Zjn_sc00013.1.g06130.1.sm.mkhc	200	197	210	90	99	69	4.06808	4.23244	4.02752	1.74237	1.75894	1.33861	0.000397136	-1.19789	down
Zjn_sc00013.1.g06160.1.sm.mkhc	64	42	42	129	143	78	2.88095	1.97775	1.77674	5.58997	5.67055	3.38287	0.0020984	1.26966	up
Zjn_sc00013.1.g06400.1.sm.mk	149	110	128	31	53	54	3.18715	2.49506	2.58632	0.613768	0.993672	1.11324	0.00040089	-1.44464	down
Zjn_sc00013.1.g06470.1.sm.mk	237	129	136	51	15	38	6.27141	3.60554	3.40904	1.28706	0.335213	0.969762	0.00045059	-2.20369	down
Zjn_sc00013.1.g06670.1.am.mk	137	80	114	178	279	286	2.81496	1.7388	2.21356	3.49154	5.0148	5.65873	0.00065209	1.21496	up
Zjn_sc00013.1.g06690.1.sm.mkhc	60	43	51	331	257	458	0.337126	0.259471	0.275381	1.82221	1.29607	2.53224	2.62063e-06	2.82648	up
Zjn_sc00013.1.g06920.1.sm.mkhc	1828	2159	2004	980	1065	752	27.5061	34.0997	28.301	13.9613	13.8878	10.8723	1.69223e-07	-1.06591	down
Zjn_sc00013.1.g07460.1.sm.mk	4895	4571	3446	1244	1521	1115	80.236	79.3288	53.4066	19.4215	21.8079	17.5992	1.25412e-07	-1.70881	down
Zjn_sc00013.1.g07500.1.sm.mkhc	106	106	125	199	237	222	2.36738	2.53281	2.66058	4.2959	4.71688	4.87371	0.00169398	1.01105	up
Zjn_sc00013.1.g07750.1.am.mk	7559	8320	6947	1920	2318	1602	220.04	256.611	191.275	53.1914	58.986	44.7866	1.29571e-17	-1.93889	down
Zjn_sc00013.1.g07850.1.sm.mkhc	1603	1659	1775	905	725	680	9.95474	10.9167	10.2697	5.24805	3.75566	3.89554	1.36771e-07	-1.07803	down
Zjn_sc00013.1.g08200.1.am.mk	406	427	594	156	267	98	11.9388	13.3012	16.5361	4.37856	6.86959	2.73636	5.22725e-06	-1.42758	down
Zjn_sc00013.1.g08310.1.sm.mk	812	705	881	1825	2428	2002	21.2563	19.3535	22.1354	45.442	56.8048	51.095	9.91186e-13	1.42581	up
Zjn_sc00013.1.g08610.1.am.mk	215	234	264	671	633	688	2.7504	3.1693	3.19557	8.20386	7.10858	8.49544	1.2267e-10	1.53251	up
Zjn_sc00013.1.g08820.1.am.mkhc	7	27	36	103	109	216	0.072064	0.332326	0.3991	1.16971	1.13597	2.48077	0.00313398	2.68787	up
Zjn_sc00013.1.g08890.1.sm.mk	218	148	165	361	385	289	18.8861	13.5242	13.4846	29.8177	29.231	24.1257	0.000279438	1.00095	up
Zjn_sc00013.1.g08970.1.am.mk	153	184	202	68	79	35	5.92127	7.50818	7.37383	2.47731	2.64608	1.28319	2.02991e-05	-1.53768	down
Zjn_sc00013.1.g08980.1.es.mkhc	109	116	115	36	51	29	5.33021	6.00308	5.31876	1.6801	2.15659	1.34398	0.000504159	-1.52481	down
Zjn_sc00013.1.g09010.1.sm.mkhc	10901	9272	7314	2956	4251	2478	97.6472	87.6891	61.7663	25.1987	33.1687	21.0759	1.6097e-05	-1.48525	down
Zjn_sc00013.1.g09110.1.sm.mkhc	2061	2409	1791	530	634	380	18.5096	22.941	15.2178	4.53477	4.98176	3.25628	6.54716e-10	-1.9983	down
Zjn_sc00013.1.g09130.1.sm.mk	3565	2545	2429	9172	10972	8115	55.8186	41.9289	35.9353	136.594	149.546	121.83	1.92987e-21	1.75878	up
Zjn_sc00013.1.g09140.1.sm.mkhc	168	227	115	47	54	11	8.72879	12.5354	5.6525	2.32736	2.42991	0.545739	0.00132176	-2.19169	down
Zjn_sc00013.1.g09180.1.sm.mkhc	10107	8219	8560	20811	23279	18486	291.225	250.99	234.737	572.478	590.801	512.911	5.56799e-12	1.25634	up
Zjn_sc00013.1.g09240.1.am.mkhc	199	161	212	96	112	66	3.66064	3.1268	3.68503	1.67954	1.80491	1.16458	0.00302279	-1.02389	down
Zjn_sc00013.1.g09250.1.sm.mkhc	1961	1525	1798	3408	3866	3310	31.5559	25.9868	27.3567	52.2702	54.4436	51.292	6.23827e-08	1.04492	up
Zjn_sc00013.1.g09610.1.sm.mk	424	446	458	100	100	106	3.5278	3.66329	3.54966	0.751067	0.708436	0.879917	2.44184e-14	-2.07171	down
Zjn_sc00013.1.g09710.1.am.mk	450	412	391	71	119	46	18.0918	17.7661	15.116	2.80465	4.17671	1.72356	5.38597e-17	-2.39431	down
Zjn_sc00013.1.g09820.1.am.mkhc	679	627	681	1193	1397	1555	6.30082	5.88183	6.11949	10.309	13.1248	13.7995	1.24978e-07	1.10794	up
Zjn_sc00013.1.g09950.1.am.mkhc	39	40	42	10	6	9	2.57712	2.80753	2.61409	0.571305	0.344048	0.538892	0.00341517	-2.21708	down
Zjn_sc00013.1.g10210.1.am.mkhc	6180	5652	4834	2382	2767	1737	112.542	99.2376	76.5922	41.2725	42.3126	29.9614	1.62926e-07	-1.2486	down
Zjn_sc00013.1.g10300.1.sm.mk	4283	3136	3882	12256	11293	13541	67.4612	52.1264	57.4363	181.549	155.127	202.732	3.4227e-16	1.76828	up
Zjn_sc00013.1.g10480.1.am.mkhc	12188	12342	11283	4464	5091	4024	219.144	239.026	191.233	68.2973	73.2772	56.8278	2.0847e-13	-1.36507	down
Zjn_sc00013.1.g10510.1.sm.mk	163	160	119	510	517	400	2.76219	2.87212	1.91047	8.27412	7.69578	6.5609	2.1765e-11	1.71973	up
Zjn_sc00013.1.g10550.1.sm.mkhc	408	413	482	816	996	1090	6.2951	6.94083	6.98444	12.1989	13.6214	16.1123	4.81155e-08	1.20437	up
Zjn_sc00013.1.g10680.1.am.mk	158	95	74	339	399	483	5.73814	3.63887	2.51288	11.7171	12.6791	16.8806	4.6794e-08	1.93965	up
Zjn_sc00014.1.g00120.1.am.mk	229	215	243	680	1035	639	3.3512	3.3195	3.36368	9.49217	13.2578	9.01152	2.89018e-09	1.80796	up
Zjn_sc00014.1.g00240.1.am.mk	545	444	294	136	45	121	9.20661	7.92143	4.66561	2.18648	0.665823	1.96493	0.000200513	-2.02955	down
Zjn_sc00014.1.g00500.1.sm.mkhc	464	437	234	122	122	110	3.68476	4.14572	1.79849	0.981255	0.926956	0.956196	0.00317031	-1.65676	down
Zjn_sc00014.1.g00600.1.sm.mkhc	1116	654	636	2075	1991	2672	6.89201	4.67218	3.67393	11.5065	11.0728	15.1802	9.9967e-06	1.53392	up
Zjn_sc00014.1.g00730.1.sm.mkhc	56	89	61	207	177	295	0.556038	0.95568	0.555626	1.95687	1.56569	2.86114	0.000467056	1.76642	up
Zjn_sc00014.1.g00780.1.am.mkhc	583	584	542	1183	1214	1150	10.0948	10.719	8.8796	19.5426	18.4168	19.1931	2.67675e-07	1.09318	up
Zjn_sc00014.1.g00810.1.am.mkhc	2184	1804	2577	4382	4051	5160	35.3988	28.4531	42.7912	64.787	55.719	75.5207	4.1028e-06	1.11048	up
Zjn_sc00014.1.g01050.1.sm.mk	130	146	77	12	13	4	3.03343	3.59676	1.69409	0.263183	0.26428	0.090226	3.21409e-07	-3.60268	down
Zjn_sc00014.1.g01170.1.sm.mk	281	269	215	119	106	140	1.75419	1.83773	1.31685	0.740766	0.564166	0.886422	0.000873265	-1.02338	down
Zjn_sc00014.1.g01210.1.sm.mk	4900	2967	4513	12980	12342	14409	93.6479	60.4887	80.4571	240.669	209.144	272.763	2.78299e-16	1.74012	up
Zjn_sc00014.1.g01240.1.sm.mkhc	5120	4127	4890	9105	9632	8879	104.957	89.4219	95.1368	179.042	173.355	176.037	6.60039e-08	1.01154	up
Zjn_sc00014.1.g01410.1.sm.mkhc	721	917	829	328	368	246	16.0233	21.9244	17.346	6.89042	7.1252	6.44899	3.37355e-09	-1.3582	down
Zjn_sc00014.1.g01750.1.sm.mkhc	3604	3460	3914	1985	1346	1599	87.4887	88.9237	89.8247	45.9116	28.584	37.3593	8.23448e-09	-1.10048	down
Zjn_sc00014.1.g01800.1.sm.mkhc	1459	2141	1251	432	378	190	44.0958	68.5483	35.7463	12.4488	9.98052	5.5179	9.69862e-05	-2.26223	down
Zjn_sc00014.1.g02190.1.am.mkhc	1232	1160	866	279	304	274	7.95761	7.80017	5.23953	1.71984	1.65527	1.63519	1.3269e-08	-1.89506	down
Zjn_sc00014.1.g02350.1.sm.mkhc	5916	4612	5162	13772	13592	13453	63.408	52.3357	52.3034	140.684	127.489	138.856	1.05473e-14	1.42523	up
Zjn_sc00014.1.g02370.1.sm.mkhc	4	0	0	58	49	75	0.049679	0	0	0.909004	0.691947	1.17562	2.1765e-11	5.55237	up
Zjn_sc00014.1.g02400.1.sm.mk	128	148	158	291	505	336	4.48328	5.49058	5.24141	9.72203	15.4822	11.3468	1.58018e-05	1.41361	up
Zjn_sc00014.1.g02550.1.sm.mkhc	983	628	913	2172	1702	2604	10.8286	4.37718	9.6843	28.7983	9.82066	33.1976	0.000201291	1.42432	up
Zjn_sc00014.1.g02680.1.sm.mkhc	104	152	113	32	29	37	2.95221	4.57296	3.04849	0.860315	0.723032	1.01712	1.1877e-05	-1.87134	down
Zjn_sc00014.1.g02930.1.sm.mk	3324	3227	3453	1540	1527	1015	77.246	75.687	75.9119	31.9155	30.7513	21.7231	1.05182e-10	-1.25632	down
Zjn_sc00014.1.g03220.1.sm.mkhc	39	80	54	118	148	118	0.44203	0.965966	0.579226	1.2773	1.47529	1.29741	0.00278408	1.17452	up
Zjn_sc00014.1.g03260.1.sm.mk	1499	1696	2203	327	193	273	132.898	159.207	184.633	27.5652	14.9052	23.2852	2.48064e-25	-2.70254	down
Zjn_sc00014.1.g03330.1.am.mk	16	27	17	72	81	84	0.233475	0.420275	0.235519	1.01211	1.04919	1.19568	0.000104383	2.01141	up
Zjn_sc00014.1.g03360.1.sm.mk	35	49	40	102	124	146	0.562044	0.841034	0.616557	1.5884	1.7643	2.29355	7.97778e-05	1.62531	up
Zjn_sc00014.1.g03380.1.sm.mkhc	582	488	743	1278	1150	1303	6.09358	5.37828	7.32315	12.6757	10.4566	13.1166	3.03869e-07	1.10137	up
Zjn_sc00014.1.g03440.1.am.mk	1264	1118	1119	608	754	289	25.8218	23.909	21.1747	11.3593	13.1598	5.37006	9.75964e-05	-1.06352	down
Zjn_sc00014.1.g03780.1.sm.mkhc	51	42	69	10	9	12	1.28049	1.1091	1.644	0.221509	0.188925	0.279791	0.00039618	-2.3192	down
Zjn_sc00014.1.g03810.1.sm.mkhc	233	265	235	123	122	110	5.40897	6.50283	5.14923	2.71569	2.4602	2.43955	0.00134367	-1.00814	down
Zjn_sc00014.1.g03960.1.sm.mkhc	246	275	326	90	148	96	3.82059	4.51253	4.78503	1.32419	2.00337	1.42709	1.48927e-05	-1.30863	down
Zjn_sc00014.1.g03990.1.am.mk	649	821	530	176	175	81	34.7322	46.4933	26.7837	8.97789	8.17951	4.15863	1.96959e-06	-2.19536	down
Zjn_sc00014.1.g04050.1.sm.mkhc	449	585	527	142	194	125	5.02616	7.34617	5.68349	1.66773	2.0531	1.13928	1.73234e-11	-1.73231	down
Zjn_sc00014.1.g04080.1.sm.mkhc	179	164	141	773	620	615	0.841555	0.815915	0.626291	3.48682	2.56257	2.78929	2.23549e-17	2.09335	up
Zjn_sc00014.1.g04120.1.sm.mkhc	548	559	654	182	225	98	11.2848	12.2001	12.7344	3.5749	4.05521	1.94353	1.4877e-12	-1.77333	down
Zjn_sc00014.1.g04160.1.sm.mkhc	44	35	41	92	114	90	1.17729	0.980172	1.04169	2.35103	2.68444	2.32709	0.00287133	1.34236	up
Zjn_sc00014.1.g04270.1.sm.mkhc	368	361	321	119	213	108	12.5098	13.008	10.3176	3.83623	6.32685	3.5377	1.43355e-05	-1.23764	down
Zjn_sc00014.1.g04410.1.am.mk	315	367	457	851	806	600	3.06643	3.78916	4.23152	7.94062	6.90772	5.64827	7.21496e-06	1.03234	up
Zjn_sc00014.1.g04490.1.sm.mk	94	104	90	36	37	18	7.95044	9.34863	7.20123	2.85432	2.69141	1.4592	0.000577451	-1.63775	down
Zjn_sc00014.1.g04820.1.am.mkhc	833	987	767	288	413	226	8.60073	9.397	6.97802	3.15155	3.83283	2.17699	6.10368e-07	-1.4624	down
Zjn_sc00014.1.g04910.1.sm.mkhc	566	619	577	209	207	112	11.2072	12.9759	10.8063	3.94251	3.57456	2.1337	7.37507e-12	-1.70949	down
Zjn_sc00014.1.g05270.1.sm.mk	85	129	51	7	13	9	1.57503	2.5247	0.882175	0.10788	0.198016	0.149902	0.000910385	-3.18964	down
Zjn_sc00014.1.g05410.1.sm.mkhc	572	553	689	1094	1188	1595	11.6899	11.7462	13.3652	20.8954	20.8179	30.9348	0.000519988	1.15296	up
Zjn_sc00014.1.g05540.1.am.mk	3798	4192	2160	662	743	458	28.9397	33.8211	15.5583	4.80217	4.95519	3.35687	8.19168e-05	-2.43257	down
Zjn_sc00014.1.g05590.1.am.mk	12526	11171	16841	4622	6754	4540	579.168	547.389	738.241	201.527	271.563	200.022	3.18288e-09	-1.30575	down
Zjn_sc00014.1.g05600.1.sm.mk	409	329	421	1108	737	916	6.51836	5.54761	6.34681	16.8355	10.2822	14.0662	7.32584e-05	1.31088	up
Zjn_sc00014.1.g05700.1.am.mk	184	246	172	89	72	75	3.08001	4.32519	2.66758	1.36835	1.0011	1.11929	0.000279893	-1.31509	down
Zjn_sc00014.1.g05780.1.sm.mkhc	51	56	51	2	8	7	0.489667	0.565872	0.460178	0.017151	0.064638	0.056354	9.89179e-06	-3.18934	down
Zjn_sc00014.1.g05890.1.sm.mk	213	209	283	84	80	87	4.06573	4.22708	5.12747	1.53364	1.33163	1.58957	6.92923e-06	-1.43409	down
Zjn_sc00014.1.g05930.1.sm.mk	171	117	98	23	28	40	1.33212	0.957864	0.717947	0.169843	0.189776	0.296649	6.43811e-05	-2.03954	down
Zjn_sc00014.1.g06020.1.am.mk	1300	1300	818	202	192	146	26.2438	27.9231	15.6684	3.89971	3.37978	2.83246	8.00754e-08	-2.63729	down
Zjn_sc00014.1.g06340.1.am.mkhc	3107	2473	2870	6879	6988	7338	94.8869	79.9963	82.8866	200.251	186.814	215.849	2.12289e-13	1.37562	up
Zjn_sc00014.1.g06350.1.am.mk	177	140	225	377	363	534	6.1517	5.14383	7.39212	12.484	11.0351	17.885	0.000913734	1.30039	up
Zjn_sc00014.1.g06430.1.sm.mkhc	206	183	179	66	73	70	4.53902	4.28138	3.74049	1.3865	1.39774	1.48051	5.61743e-05	-1.40185	down
Zjn_sc00014.1.g06620.1.sm.mk	429	474	405	169	189	154	7.77052	9.08929	6.93703	2.91286	2.99393	2.68076	6.28328e-07	-1.32008	down
Zjn_sc00014.1.g06700.1.am.mk	554	591	427	158	139	117	17.1579	19.3977	12.5113	4.64049	3.75438	3.4833	1.38325e-08	-1.89339	down
Zjn_sc00014.1.g06760.1.am.mk	4678	3928	4410	1548	1250	1580	120.923	107.491	107.762	38.1148	28.2758	39.3271	1.14826e-15	-1.51836	down
Zjn_sc00014.1.g06840.1.sm.mkhc	174	176	186	440	500	367	2.35451	2.52854	2.39198	5.69934	5.94826	4.7972	3.49495e-07	1.32293	up
Zjn_sc00014.1.g07060.1.am.mk	20	12	14	80	84	52	0.678712	0.418221	0.437555	2.66308	2.58673	1.75928	4.65235e-05	2.26633	up
Zjn_sc00014.1.g07330.1.am.mk	1853	1560	2014	3913	4026	3377	41.8292	37.3081	42.9969	84.1315	79.5639	73.394	9.33423e-09	1.10679	up
Zjn_sc00014.1.g07340.1.am.mk	549	337	357	67	120	57	8.29145	5.43353	5.13412	0.903448	1.59205	0.823375	1.75064e-06	-2.32975	down
Zjn_sc00014.1.g07430.1.am.mk	46	8	44	160	162	72	2.68764	0.486702	2.43213	8.99798	8.3809	4.1006	0.00129604	2.06586	up
Zjn_sc00014.1.g07540.1.am.mk	1265	1132	1309	3490	3297	3753	12.357	11.6712	12.0729	32.3485	28.0754	35.1385	8.29321e-16	1.55917	up
Zjn_sc00014.1.g07620.1.sm.mkhc	1820	1234	2343	4171	3569	4489	16.7687	12.2342	21.1506	37.0791	28.9535	40.2835	3.15947e-06	1.24867	up
Zjn_sc00014.1.g07660.1.am.mk	90	93	88	19	15	15	3.44305	3.77501	3.19499	0.673872	0.472234	0.532897	2.46369e-06	-2.42327	down
Zjn_sc00014.1.g07700.1.sm.mkhc	3481	3088	3261	1419	1527	1475	47.1879	44.0512	41.54	17.8953	17.8208	18.799	1.09687e-08	-1.10951	down
Zjn_sc00014.1.g07760.1.sm.mkhc	2269	2365	2327	690	769	537	31.0125	34.2386	30.2146	8.9268	8.15783	7.04301	1.60758e-18	-1.76823	down
Zjn_sc00014.1.g07770.1.am.mkhc	571	516	657	1236	995	1235	6.22433	5.82112	6.79423	12.29	9.37849	12.727	2.59779e-06	1.0485	up
Zjn_sc00014.1.g07840.1.am.mk	15124	16128	15330	5813	7146	4117	436.064	492.379	417.874	159.713	180.302	114.341	2.15879e-14	-1.42024	down
Zjn_sc00014.1.g08110.1.am.mk	379	271	264	702	969	596	28.6426	21.6713	18.8681	50.5961	64.1199	43.3569	1.37457e-06	1.33734	up
Zjn_sc00014.1.g08380.1.sm.mkhc	2675	1835	3049	978	912	921	72.4484	52.7583	78.1296	25.2156	21.9896	23.8881	1.33138e-07	-1.36856	down
Zjn_sc00014.1.g08430.1.sm.mkhc	197	190	196	370	662	423	4.43248	4.51727	4.16193	7.94781	13.0462	9.17306	0.000112725	1.34677	up
Zjn_sc00014.1.g08440.1.am.mk	39	23	46	78	123	59	2.07473	1.27347	2.30919	3.96437	5.75926	3.04355	0.0064358	1.30769	up
Zjn_sc00014.1.g08460.1.sm.mkhc	323	381	401	113	138	84	7.74972	9.67637	9.09098	2.56894	2.88608	1.91863	2.18999e-09	-1.68936	down
Zjn_sc00014.1.g08500.1.sm.mk	246	186	148	76	105	48	5.43615	4.34371	3.09202	1.59103	2.02974	1.01619	0.00253582	-1.3254	down
Zjn_sc00014.1.g08520.1.sm.mkhc	1038	911	1116	454	503	499	12.2726	11.3999	12.4771	5.10731	5.2027	5.67873	2.59497e-06	-1.02553	down
Zjn_sc00014.1.g08540.1.sm.mkhc	447	449	426	44	179	55	12.0456	12.8206	10.8586	1.11721	4.20938	1.41885	3.46562e-15	-2.25283	down
Zjn_sc00014.1.g08650.1.sm.mk	207	147	214	64	29	71	10.5905	7.93	10.3476	3.08748	1.27829	3.4669	8.3225e-07	-1.71498	down
Zjn_sc00014.1.g08710.1.am.mk	197	197	232	532	529	479	4.94882	5.24247	5.50007	12.7295	11.6307	11.5807	8.11783e-08	1.34534	up
Zjn_sc00014.1.g09000.1.am.mk	5751	5356	3598	1003	1173	464	232.822	229.499	137.666	38.6685	41.5124	18.0485	1.51983e-07	-2.46634	down
Zjn_sc00014.1.g09050.1.sm.mkhc	1692	1687	1235	390	397	291	14.6929	15.5124	10.1374	3.22114	3.01185	2.4309	1.39628e-09	-2.07041	down
Zjn_sc00014.1.g09070.1.am.mk	575	649	474	159	257	73	20.3273	24.3015	15.8425	5.35068	7.9468	2.31791	4.78056e-06	-1.79377	down
Zjn_sc00014.1.g09080.1.am.mk	275	169	369	494	550	532	3.85036	2.50302	4.89075	6.59543	6.74693	7.18437	5.58404e-05	1.01883	up
Zjn_sc00014.1.g09180.1.sm.mkhc	894	753	918	1749	2150	2106	37.1303	33.1109	36.0816	69.2857	78.2241	84.3005	2.32782e-10	1.27394	up
Zjn_sc00014.1.g09330.1.sm.mk	246	156	200	93	67	72	14.3746	9.65243	11.012	5.13791	3.41073	4.04835	8.42497e-05	-1.32211	down
Zjn_sc00014.1.g09370.1.am.mk	523	554	479	234	196	232	10.2515	11.4217	8.77137	4.3461	3.30304	4.32451	2.04022e-06	-1.18837	down
Zjn_sc00014.1.g09560.1.sm.mk	2126	1975	1913	423	434	406	20.3335	19.7592	17.1856	3.8344	3.60225	3.69143	1.18964e-26	-2.21094	down
Zjn_sc00014.1.g09680.1.sm.mk	3048	3415	3203	1131	1149	989	14.644	17.3331	14.5414	5.29	4.93837	4.62786	4.7762e-15	-1.52577	down
Zjn_sc00014.1.g09700.1.sm.mkhc	3487	2535	2619	1086	1029	879	39.155	30.2083	27.975	12.0789	10.1374	9.68858	3.16594e-08	-1.48876	down
Zjn_sc00014.1.g09780.1.am.mk	635	673	502	199	170	64	22.0941	24.7744	16.4814	6.58891	5.16737	2.12158	1.96151e-08	-2.044	down
Zjn_sc00014.1.g09820.1.sm.mk	2803	2506	1912	389	388	261	77.8489	76.0132	49.342	10.6757	8.59726	7.60901	8.15662e-13	-2.77156	down
Zjn_sc00014.1.g09890.1.sm.mkhc	1973	2032	2335	5216	5046	5443	35.4407	38.6432	39.6486	89.3003	79.3312	94.1587	7.85716e-13	1.35891	up
Zjn_sc00014.1.g09910.1.sm.mkhc	56	75	68	146	136	162	1.34433	1.89192	1.54861	3.34253	2.85282	3.7452	0.00136286	1.20369	up
Zjn_sc00014.1.g09950.1.am.mk	294	266	247	130	111	96	7.82001	7.62041	4.42146	2.49631	2.21955	1.78148	6.11953e-05	-1.2204	down
Zjn_sc00014.1.g10060.1.sm.mk	332	568	375	103	72	70	13.192	23.9395	14.1082	3.90435	2.50896	2.66514	5.17067e-05	-2.34554	down
Zjn_sc00014.1.g10080.1.sm.mk	348	414	369	74	157	57	22.5627	28.4367	22.6253	4.52054	8.88978	3.53533	8.58481e-12	-1.96559	down
Zjn_sc00014.1.g10140.1.sm.mkhc	591	688	772	89	130	137	11.3974	14.1617	14.1053	1.67897	2.13843	2.53313	3.41549e-23	-2.48026	down
Zjn_sc00014.1.g10200.1.sm.mkhc	263	236	289	129	149	94	7.1237	6.78537	7.41363	3.31894	3.52864	2.45393	0.000666759	-1.04515	down
Zjn_sc00014.1.g10210.1.sm.mkhc	272	367	316	129	181	134	10.2187	14.6073	11.2225	4.59365	5.95092	4.83631	0.000212678	-1.07606	down
Zjn_sc00014.1.g10460.1.sm.mkhc	5243	5292	5926	1514	1829	1344	95.4428	101.841	101.941	26.2624	28.9679	23.539	1.10373e-20	-1.77418	down
Zjn_sc00014.1.g10650.1.am.mk	80	79	75	182	241	199	1.14396	1.2003	1.02498	2.49825	3.04346	2.77178	1.23283e-05	1.44495	up
Zjn_sc00014.1.g10670.1.am.mk	570	501	516	1149	1211	1088	11.7198	10.894	10.0223	22.5107	21.7779	21.544	5.48123e-08	1.16047	up
Zjn_sc00014.1.g10700.1.sm.mk	58	64	59	3	15	5	2.49795	2.93761	2.41389	0.12253	0.566774	0.167743	7.78909e-06	-2.98041	down
Zjn_sc00015.1.g00200.1.sm.mkhc	23	18	23	115	76	99	0.280148	0.226196	0.258955	1.35181	0.82659	1.17572	3.95678e-06	2.23928	up
Zjn_sc00015.1.g00260.1.sm.mkhc	284	259	259	121	113	81	2.32856	2.24892	1.88999	0.81081	0.783402	0.522029	1.90299e-05	-1.31141	down
Zjn_sc00015.1.g00610.1.sm.mkhc	106	122	88	38	37	17	2.84561	3.35277	2.10527	0.973553	0.759639	0.547813	0.000129048	-1.76123	down
Zjn_sc00015.1.g00720.1.am.mk	19	27	50	90	66	86	0.267599	0.395764	0.656992	1.21316	0.815384	1.16252	0.00556383	1.40966	up
Zjn_sc00015.1.g00790.1.sm.mk	154	220	300	570	370	585	3.38122	5.13227	6.2389	11.9698	7.13789	12.4076	0.00385044	1.24722	up
Zjn_sc00015.1.g01010.1.sm.mkhc	240	239	295	93	87	68	9.68347	10.2195	11.245	3.5631	3.05704	2.62711	3.49996e-07	-1.59627	down
Zjn_sc00015.1.g01030.1.sm.mkhc	1594	1773	2044	694	921	684	21.0159	25.1546	25.8037	8.812	10.7692	8.43317	4.70372e-09	-1.19619	down
Zjn_sc00015.1.g01070.1.sm.mk	423	355	279	1590	1287	1312	6.44398	5.92973	3.38401	24.6403	17.7304	20.2679	2.45375e-17	2.02514	up
Zjn_sc00015.1.g01190.1.sm.mk	491	490	487	1770	1926	1160	8.02009	8.37519	7.47044	27.5178	27.9432	18.1702	4.76405e-09	1.75734	up
Zjn_sc00015.1.g01530.1.am.mkhc	4716	4431	4802	1696	2545	1509	136.784	136.15	131.712	46.8859	64.6132	42.1232	8.38019e-11	-1.2494	down
Zjn_sc00015.1.g01630.1.sm.mkhc	12087	13160	13145	3328	4170	3627	292.108	331.386	292.039	89.8626	87.3207	80.8032	4.28311e-21	-1.7487	down
Zjn_sc00015.1.g01870.1.sm.mkhc	852	799	829	373	510	321	23.4982	23.3322	21.6292	9.80232	12.3071	8.51654	1.09618e-05	-1.01218	down
Zjn_sc00015.1.g01890.1.am.mk	195	215	194	26	25	20	2.95995	3.44519	2.77393	0.365708	0.323651	0.287477	1.88845e-15	-3.05258	down
Zjn_sc00015.1.g02110.1.sm.mkhc	4405	3900	4596	1229	1259	1156	55.1956	51.7447	55.0316	14.6747	13.808	13.9433	1.75734e-20	-1.77782	down
Zjn_sc00015.1.g02130.1.am.mk	204	301	484	45	92	53	2.98599	10.2847	34.2337	0.631424	1.171	0.721777	0.000245311	-2.33906	down
Zjn_sc00015.1.g02140.1.sm.mk	4066	4749	4122	771	2020	873	73.5287	90.9171	70.4756	13.2837	31.959	15.1954	1.15191e-09	-1.81207	down
Zjn_sc00015.1.g02290.1.am.mk	76	89	112	15	41	8	1.86983	2.33503	2.61477	0.341526	0.880708	0.18289	3.07808e-05	-2.10976	down
Zjn_sc00015.1.g02300.1.sm.mkhc	66	22	51	325	249	281	0.750811	0.239359	0.503079	3.42657	2.37188	2.96858	1.37884e-16	2.68603	up
Zjn_sc00015.1.g02380.1.am.mk	253	327	349	30	84	48	6.6751	9.12453	8.69181	0.726562	1.93759	1.20217	2.50708e-15	-2.49797	down
Zjn_sc00015.1.g02590.1.am.mk	80	87	94	22	22	27	1.52491	1.75665	1.68355	0.388734	0.359133	0.478433	0.000244735	-1.82689	down
Zjn_sc00015.1.g02650.1.sm.mkhc	908	981	739	334	387	299	41.3414	47.3196	31.8195	14.5001	15.4175	13.0928	8.75417e-07	-1.33772	down
Zjn_sc00015.1.g02680.1.sm.mk	30	12	11	47	82	50	0.875904	0.364639	0.281203	1.29824	2.0903	1.38758	0.00239922	1.77621	up
Zjn_sc00015.1.g02950.1.sm.mk	467	378	517	824	1242	732	12.5982	10.7939	13.1682	21.1936	29.3945	19.0211	0.000239356	1.07431	up
Zjn_sc00015.1.g03000.1.sm.mkhc	318	422	371	62	80	29	16.2852	22.8599	17.9271	3.00896	3.57462	1.40955	5.37608e-17	-2.68351	down
Zjn_sc00015.1.g03120.1.sm.mkhc	10381	11574	9629	2722	3449	2024	143.005	169.094	125.528	35.7293	41.4969	26.6236	9.16499e-16	-1.9229	down
Zjn_sc00015.1.g03150.1.am.mk	314	365	268	983	1054	796	4.47122	5.50483	3.60785	13.3604	13.1696	10.9265	2.84061e-13	1.60828	up
Zjn_sc00015.1.g03510.1.am.mk	1912	1142	2464	824	326	746	42.627	26.3677	48.8505	17.4161	6.2295	15.9468	0.00263346	-1.45372	down
Zjn_sc00015.1.g03840.1.sm.mk	11669	12546	11558	2339	3489	1914	294.252	334.99	275.55	56.2091	76.9819	46.4748	6.2547e-31	-2.1853	down
Zjn_sc00015.1.g04100.1.sm.mkhc	349	250	258	1361	1711	1903	14.4093	10.919	10.09	53.6429	61.938	75.7729	2.90317e-17	2.58133	up
Zjn_sc00015.1.g04200.1.am.mk	229	258	265	680	641	588	5.58614	6.64081	6.10262	15.8007	13.6734	13.8403	5.74493e-09	1.38747	up
Zjn_sc00015.1.g04220.1.sm.mkhc	1325	1105	1139	2320	2533	2300	6.61207	5.73351	5.19311	11.5775	11.444	11.6719	1.29742e-07	1.04375	up
Zjn_sc00015.1.g04420.1.sm.mk	59	48	73	120	144	155	2.12715	1.84713	2.49455	4.14494	4.56865	5.43604	0.00106606	1.27533	up
Zjn_sc00015.1.g04800.1.sm.mkhc	9792	8202	8147	24787	28348	19018	135.322	120.068	106.291	324.891	345.323	251.392	1.35928e-13	1.49706	up
Zjn_sc00015.1.g04830.1.sm.mkhc	2489	1839	1672	9878	10432	11076	24.6427	19.2455	15.6425	93.3391	90.4887	105.75	5.63245e-38	2.42784	up
Zjn_sc00015.1.g04920.1.sm.mk	186	150	167	322	331	382	2.48741	2.11301	2.10937	4.10715	3.87294	4.91268	8.91188e-05	1.09021	up
Zjn_sc00015.1.g05400.1.sm.mkhc	327	138	250	598	412	591	2.44916	1.08763	1.77669	4.29854	2.72038	4.29279	0.00276941	1.22963	up
Zjn_sc00015.1.g05620.1.am.mk	952	1235	978	273	259	134	18.3069	25.557	18.2398	4.99565	4.32827	2.45155	3.04635e-11	-2.22437	down
Zjn_sc00015.1.g05800.1.sm.mkhc	123	121	54	18	13	20	2.62663	2.72424	1.08747	0.349364	0.233573	0.394491	0.000941706	-2.51217	down
Zjn_sc00015.1.g05920.1.sm.mkhc	2135	1439	2035	3817	3335	4328	13.6266	9.37686	12.3789	22.7543	18.2515	25.9112	2.6298e-05	1.09284	up
Zjn_sc00015.1.g05980.1.am.mk	191	255	259	138	118	56	1.36584	1.93841	1.75447	0.943602	0.739236	0.385345	0.000477528	-1.14319	down
Zjn_sc00015.1.g05990.1.sm.mkhc	1655	1507	1406	615	606	570	13.0476	14.0151	11.4741	5.08649	4.78018	4.91751	2.727e-10	-1.31093	down
Zjn_sc00015.1.g06090.1.am.mk	20	17	34	77	96	79	0.921578	0.824793	1.45031	3.37066	3.86486	3.51537	0.000199532	1.88669	up
Zjn_sc00015.1.g06230.1.sm.mk	193	189	144	81	65	72	2.91196	3.0198	2.05162	1.16222	0.860431	1.04012	0.000539962	-1.23108	down
Zjn_sc00015.1.g06310.1.am.mk	195	184	161	66	77	32	1.39165	1.38698	1.08754	0.447402	0.479168	0.219465	9.91595e-06	-1.60608	down
Zjn_sc00015.1.g06430.1.am.mk	640	588	458	2260	2800	1908	11.2207	10.9233	7.59704	37.7824	42.9775	32.2334	2.80442e-23	2.07199	up
Zjn_sc00015.1.g06460.1.sm.mk	836	688	787	2234	2840	2439	18.3308	15.9626	16.3165	46.6812	54.4929	51.4982	1.42346e-18	1.74187	up
Zjn_sc00015.1.g06960.1.sm.mkhc	1095	1001	1289	2138	2383	2247	16.7213	16.21	18.609	31.2262	32.0259	33.0409	1.61947e-07	1.04851	up
Zjn_sc00015.1.g06970.1.sm.mkhc	629	612	789	1571	1534	1640	10.7065	11.1675	12.6677	25.4309	22.7254	26.8201	6.54716e-10	1.27844	up
Zjn_sc00015.1.g07060.1.sm.mkhc	1175	1267	1114	410	872	212	38.8553	44.3456	34.8066	12.9029	25.2152	6.74528	0.00214158	-1.2512	down
Zjn_sc00015.1.g07330.1.sm.mk	256	378	456	26	59	47	3.72338	5.89346	6.33887	0.346769	0.735854	0.639268	1.35982e-11	-3.00751	down
Zjn_sc00015.1.g07380.1.sm.mk	77	68	80	0	3	0	0.497863	0.483626	0.488369	0	0.011576	0	3.78558e-14	-6.28135	down
Zjn_sc00015.1.g07420.1.am.mk	73	72	54	148	172	125	1.18111	1.23729	0.823994	2.28831	2.45783	1.95737	0.00133383	1.18712	up
Zjn_sc00015.1.g07560.1.sm.mkhc	379	467	650	236	143	217	9.8679	12.8739	16.0051	5.85058	3.2469	5.42653	0.00020989	-1.25904	down
Zjn_sc00015.1.g07610.1.am.mk	43	65	43	9	8	4	0.919309	1.48597	0.870442	0.171551	0.147854	0.063875	7.68347e-05	-2.82679	down
Zjn_sc00015.1.g07650.1.am.mkhc	499	501	588	205	212	163	6.55171	6.96435	7.30548	2.56021	2.43283	2.05145	1.9504e-08	-1.41056	down
Zjn_sc00015.1.g07750.1.am.mkhc	3059	2372	2584	8570	6907	9169	24.1964	19.9071	19.0875	64.0874	47.3866	68.9845	5.33855e-09	1.67399	up
Zjn_sc00015.1.g07770.1.sm.mkhc	3080	3233	3082	1103	1722	853	51.3446	57.0519	48.5681	17.5128	25.1127	13.6885	1.56523e-11	-1.33204	down
Zjn_sc00015.1.g07780.1.sm.mk	197	204	164	50	34	38	4.67838	5.14794	3.67883	1.12878	0.703794	0.864687	2.99181e-09	-2.16849	down
Zjn_sc00015.1.g07870.1.am.mkhc	327	224	291	599	442	587	7.40499	5.35787	6.21943	12.9363	8.76234	12.8058	0.000563894	1.00989	up
Zjn_sc00015.1.g07990.1.sm.mkhc	247	349	386	103	144	137	2.90104	4.38394	4.33828	1.16175	1.4723	1.56587	5.36993e-06	-1.31064	down
Zjn_sc00015.1.g08070.1.sm.mkhc	1199	892	1051	292	255	134	23.8403	18.7611	19.7596	5.51582	4.42471	2.55643	1.24185e-19	-2.16954	down
Zjn_sc00015.1.g08080.1.sm.mkhc	3245	3401	2530	828	1327	464	89.2947	99.3411	65.9806	21.8033	32.0602	12.3584	6.35998e-07	-1.80259	down
Zjn_sc00015.1.g08100.1.sm.mkhc	4741	4945	4480	885	874	563	70.0376	76.7502	62.7557	11.8751	10.9623	7.63567	4.19842e-39	-2.57763	down
Zjn_sc00015.1.g08340.1.am.mkhc	365	392	377	101	104	114	9.3045	9.76175	8.7049	3.05971	2.30086	3.47871	1.6728e-10	-1.78532	down
Zjn_sc00015.1.g08410.1.sm.mkhc	5078	4994	4986	1220	2111	1075	238.359	248.188	221.283	54.5785	86.6871	48.5863	1.01343e-19	-1.75168	down
Zjn_sc00016.1.g00060.1.am.mkhc	454	542	457	1127	784	1192	4.54199	6.29625	4.74318	11.5577	7.88894	13.3694	0.00159414	1.14544	up
Zjn_sc00016.1.g00080.1.am.mk	1228	1030	1211	2114	2462	2479	40.1457	36.3247	37.4718	65.8528	70.4159	78.0143	7.31906e-08	1.07084	up
Zjn_sc00016.1.g00120.1.am.mk	588	799	560	0	193	242	20.0928	28.9451	18.1137	0	5.75554	7.94489	5.08879e-05	-2.13348	down
Zjn_sc00016.1.g00360.1.am.mk	18	25	51	145	89	85	0.461767	0.685772	1.29407	3.69886	2.09338	2.1925	0.00127176	1.83754	up
Zjn_sc00016.1.g00590.1.sm.mkhc	79	66	93	219	186	303	0.779685	0.681565	0.869198	2.06212	1.60888	2.87876	0.000353153	1.6393	up
Zjn_sc00016.1.g00600.1.sm.mkhc	840	911	756	1847	1864	1797	10.5804	12.1441	9.00985	22.198	20.6031	21.8224	5.5283e-09	1.17263	up
Zjn_sc00016.1.g00740.1.sm.mk	183	230	79	2	2	5	3.27295	4.35847	1.33266	0.029726	0.026686	0.069868	2.02397e-06	-5.73379	down
Zjn_sc00016.1.g00900.1.sm.mkhc	835	1061	1473	201	253	71	28.5171	38.383	47.5654	6.53232	7.55419	2.32244	2.94036e-10	-2.65321	down
Zjn_sc00016.1.g01330.1.am.mk	58	128	101	4	11	4	2.23346	5.20309	3.64679	0.129593	0.352113	0.139654	2.13978e-06	-3.91611	down
Zjn_sc00016.1.g01340.1.es.mkhc	68	124	108	2	15	5	3.55547	6.84632	5.31609	0.05892	0.651934	0.237195	4.39127e-09	-3.77776	down
Zjn_sc00016.1.g01400.1.sm.mk	187	219	162	434	355	336	8.36315	10.3761	6.82847	18.5346	13.9149	14.4741	0.000137274	1.02138	up
Zjn_sc00016.1.g01420.1.am.mk	10	13	9	92	72	110	0.112593	0.132455	0.076919	0.918418	0.647853	1.1225	4.18549e-09	3.14239	up
Zjn_sc00016.1.g01580.1.sm.mk	109	176	268	621	347	412	0.998174	1.70885	2.32455	5.43799	2.79066	3.64268	0.00996639	1.3887	up
Zjn_sc00016.1.g01700.1.sm.mkhc	343	279	640	1106	751	827	7.72294	6.69172	13.7637	23.986	14.9614	18.0875	0.00441547	1.16464	up
Zjn_sc00016.1.g01780.1.sm.mkhc	1023	949	919	179	144	144	22.3903	21.9283	19.0218	3.72043	2.748	3.01488	2.76345e-28	-2.5857	down
Zjn_sc00016.1.g01940.1.sm.mkhc	2390	2620	2753	850	762	755	28.315	32.865	30.8285	9.59277	7.89411	8.60515	3.10341e-17	-1.66726	down
Zjn_sc00016.1.g01980.1.am.mk	1305	1105	1240	424	466	317	17.1184	16.1933	16.2833	5.44682	5.79056	4.09631	4.47546e-13	-1.55958	down
Zjn_sc00016.1.g02120.1.sm.mk	1373	1291	1133	344	322	295	50.5307	50.2957	39.4104	12.0656	10.3716	10.4328	3.12972e-19	-1.94418	down
Zjn_sc00016.1.g02170.1.sm.mk	1234	2025	1908	650	824	555	61.6383	107.108	90.1121	30.9226	36.0069	26.6878	0.000348527	-1.31723	down
Zjn_sc00016.1.g02250.1.sm.mkhc	548	608	736	1667	1511	1585	5.12962	5.86965	6.6531	15.2307	12.955	14.3799	2.1672e-11	1.38424	up
Zjn_sc00016.1.g02430.1.sm.mk	130	135	163	69	75	54	5.96405	6.55629	7.07163	3.02762	3.01673	2.39559	0.00566364	-1.07048	down
Zjn_sc00016.1.g02790.1.sm.mkhc	193	153	130	593	774	663	4.87145	4.07721	3.09512	14.2781	17.1187	16.1402	1.78232e-18	2.12428	up
Zjn_sc00016.1.g02800.1.sm.mk	507	562	626	133	340	210	9.40188	11.5765	11.0366	2.33373	5.63749	3.9926	2.64965e-07	-1.28566	down
Zjn_sc00016.1.g02820.1.am.mkhc	71	65	40	6	33	15	1.4003	1.34077	0.729669	0.09621	0.561431	0.269692	0.00569077	-1.71224	down
Zjn_sc00016.1.g03230.1.am.mk	1172	1202	1461	3217	2923	3496	28.2006	33.3482	34.349	75.3294	62.0634	82.3121	2.27195e-12	1.38423	up
Zjn_sc00016.1.g03330.1.sm.mk	1631	1564	1126	342	395	350	26.0598	26.4626	17.0024	5.19815	5.51784	5.37967	4.3041e-08	-1.96142	down
Zjn_sc00016.1.g03360.1.am.mk	1937	2078	2902	815	1300	740	26.5773	30.1854	37.6404	10.6477	15.6052	9.77034	2.41839e-06	-1.24005	down
Zjn_sc00016.1.g03380.1.am.mk	167	150	111	71	62	47	7.55224	7.15788	4.74282	3.03844	2.43859	2.01738	0.00178159	-1.21951	down
Zjn_sc00016.1.g03410.1.sm.mk	50	98	69	26	29	21	2.52036	5.21109	3.25792	1.22702	1.25102	0.993478	0.00929159	-1.48886	down
Zjn_sc00016.1.g03430.1.am.mk	1237	1662	1238	3633	3292	2616	31.539	45.0128	28.9126	83.7144	67.6776	58.0156	1.30837e-07	1.23653	up
Zjn_sc00016.1.g03440.1.am.mk	13	9	27	83	47	48	0.114803	0.081217	0.235694	0.74543	0.38593	0.433776	0.00233424	1.94487	up
Zjn_sc00016.1.g03720.1.sm.mkhc	8221	6617	8283	15695	16509	15383	127.455	109.528	117.145	222.438	209.858	213.348	4.11517e-09	1.08891	up
Zjn_sc00016.1.g03950.1.sm.mkhc	340	230	333	829	597	892	2.46694	1.97668	2.25492	5.46514	3.97047	6.13655	9.99092e-05	1.4248	up
Zjn_sc00016.1.g04280.1.am.mk	491	427	373	1129	954	732	6.56652	6.04944	4.72065	14.3857	11.1591	9.42516	5.28828e-05	1.15995	up
Zjn_sc00016.1.g04350.1.sm.mkhc	3996	3317	3497	8916	8164	9106	47.063	41.4948	38.9042	101.688	84.7188	105.07	1.1962e-12	1.32421	up
Zjn_sc00016.1.g04630.1.sm.mk	18743	16013	14970	38210	46330	37383	1287.97	1165.1	972.551	2502.42	2786.18	2473.77	2.06227e-13	1.32793	up
Zjn_sc00016.1.g04690.1.sm.mkhc	1383	1460	1253	299	335	178	25.7569	28.7902	22.0638	5.29672	5.46051	3.1758	8.87264e-24	-2.31047	down
Zjn_sc00016.1.g04700.1.am.mk	155	182	148	31	32	29	0.579182	1.09012	0.875104	0.108495	0.212708	0.101943	2.43135e-09	-2.36335	down
Zjn_sc00016.1.g05180.1.am.mkhc	33	47	23	125	106	123	0.610224	0.92887	0.400739	2.2556	1.75236	2.24696	1.91461e-05	1.80896	up
Zjn_sc00016.1.g05200.1.am.mkhc	12590	9621	10486	27508	27835	27047	222.622	180.125	175.297	463.571	430.742	460.563	4.61699e-14	1.37766	up
Zjn_sc00016.1.g05230.1.sm.mkhc	2783	2660	2331	912	1126	709	39.319	39.604	31.1034	12.1256	13.958	9.52852	1.09792e-12	-1.4742	down
Zjn_sc00016.1.g05270.1.sm.mkhc	90	105	67	15	12	4	2.93275	3.62745	2.04497	0.43899	0.318494	0.095813	3.46302e-08	-3.06416	down
Zjn_sc00016.1.g05280.1.am.mk	111	172	161	787	528	813	2.64176	4.35423	3.71059	18.0518	11.1558	18.8451	1.73237e-07	2.31613	up
Zjn_sc00016.1.g05340.1.sm.mkhc	268	271	298	108	180	89	11.8176	12.6427	12.4129	4.51161	6.94206	3.75501	0.000221412	-1.12628	down
Zjn_sc00016.1.g05650.1.sm.mkhc	1567	931	1129	3324	4111	3114	40.7501	25.6242	27.7695	82.4369	93.6349	78.0545	2.12852e-16	1.5785	up
Zjn_sc00016.1.g05680.1.am.mkhc	176	143	210	55	70	30	5.77802	4.98029	6.51004	1.72027	2.00326	0.92367	2.27064e-06	-1.73686	down
Zjn_sc00016.1.g05880.1.am.mk	419	365	374	1647	1806	1366	7.22809	6.65548	6.0995	27.0779	27.2619	22.6806	1.60839e-23	2.09361	up
Zjn_sc00016.1.g05920.1.am.mk	138	135	67	1243	1792	831	5.85761	6.10403	2.67624	50.6037	66.9969	34.1831	1.15351e-09	3.51048	up
Zjn_sc00016.1.g05970.1.am.mk	579	615	846	3428	2682	3357	4.94982	5.5668	6.83685	27.9616	20.0872	27.6662	3.29648e-15	2.27596	up
Zjn_sc00016.1.g05990.1.sm.mkhc	2511	2257	1605	613	812	587	30.3407	28.9115	18.5319	7.17884	8.99784	6.54252	1.73959e-05	-1.64041	down
Zjn_sc00016.1.g06140.1.am.mk	282	418	332	134	173	123	4.37459	6.85736	4.87187	1.98229	2.34563	1.83755	0.000270312	-1.23665	down
Zjn_sc00016.1.g06210.1.sm.mkhc	976	989	933	266	357	196	22.0733	23.6862	19.9616	5.72246	7.06629	4.30274	2.0954e-15	-1.79822	down
Zjn_sc00016.1.g06250.1.sm.mkhc	81	122	115	48	47	44	0.605299	0.967169	0.811894	0.340534	0.308198	0.313268	0.00896197	-1.15245	down
Zjn_sc00016.1.g06660.1.sm.mkhc	1060	1075	1045	366	697	388	17.1941	18.4505	16.0267	5.65574	9.88893	6.05611	5.85339e-07	-1.11057	down
Zjn_sc00016.1.g06700.1.am.mkhc	763	508	634	2340	2062	3172	5.447	3.83304	4.30024	16.1532	12.9655	21.978	3.18729e-06	2.05089	up
Zjn_sc00016.1.g06740.1.sm.mk	4476	3307	3207	17216	15719	18945	120.437	92.9371	81.3312	442.888	372.839	486.159	1.47444e-21	2.28571	up
Zjn_sc00016.1.g06930.1.am.mk	1881	1861	2282	3723	3725	4410	19.0048	19.9113	21.7963	35.8472	32.9363	42.9077	1.10438e-07	1.03123	up
Zjn_sc00016.1.g07010.1.sm.mkhc	1637	1944	2206	468	719	507	26.6067	33.4555	33.9034	7.23349	10.225	7.91886	2.09758e-17	-1.73686	down
Zjn_sc00017.1.g00060.1.sm.mkhc	909	973	795	1503	3297	2211	10.314	11.6929	8.52882	16.2617	32.7385	24.1218	0.00279839	1.40855	up
Zjn_sc00017.1.g00190.1.am.mk	23	7	32	68	178	76	0.487239	0.153632	0.627018	1.36587	3.2899	1.54372	0.00738089	2.42438	up
Zjn_sc00017.1.g00390.1.sm.mkhc	132	108	108	595	459	753	0.735568	1.18031	0.56888	5.2932	3.72396	6.46806	6.53282e-07	2.43264	up
Zjn_sc00017.1.g00760.1.sm.mkhc	1267	1094	1977	3298	2870	3050	15.044	13.7455	22.1989	37.32	29.8214	34.8813	4.97094e-08	1.1526	up
Zjn_sc00017.1.g00900.1.sm.mkhc	199	173	178	80	95	58	11.0757	10.2052	9.35107	4.2269	4.58869	3.10755	0.00061558	-1.20808	down
Zjn_sc00017.1.g00950.1.sm.mk	3350	2287	2699	8225	8264	8436	42.7242	29.9046	32.5102	100.047	92.3188	103.656	2.84115e-18	1.62753	up
Zjn_sc00017.1.g00960.1.sm.mkhc	262	290	345	116	138	94	3.01525	3.53912	3.75142	1.27389	1.38309	1.03358	7.18796e-06	-1.32693	down
Zjn_sc00017.1.g01110.1.sm.mk	271	152	172	569	533	567	2.35633	1.39258	1.41465	4.7168	4.05182	4.75029	5.36714e-10	1.53471	up
Zjn_sc00017.1.g01210.1.sm.mkhc	608	477	656	1238	1008	1604	2.71504	2.2449	2.77631	5.28495	3.95325	6.92119	0.00239409	1.20987	up
Zjn_sc00017.1.g01380.1.sm.mkhc	933	1025	1087	404	605	322	42.402	50.3551	47.7072	17.4472	21.71	13.7035	1.54491e-07	-1.16725	down
Zjn_sc00017.1.g01630.1.sm.mk	9625	9583	8648	3089	3732	2645	145.508	153.391	123.623	44.4811	49.2205	38.4807	3.49348e-16	-1.52671	down
Zjn_sc00017.1.g01980.1.am.mkhc	342	362	467	181	264	90	18.5165	20.7394	23.9081	9.32851	12.5062	4.70083	0.000357949	-1.1051	down
Zjn_sc00017.1.g02020.1.sm.mkhc	166	155	92	32	52	65	3.56683	3.52889	1.8682	0.65689	0.975624	1.3314	0.0055296	-1.43954	down
Zjn_sc00017.1.g02140.1.am.mk	69	118	69	12	16	7	1.86159	3.38304	1.74867	0.304912	0.370871	0.17398	6.32942e-05	-2.86446	down
Zjn_sc00017.1.g02190.1.cf.mkhc	170	148	162	78	58	71	1.74929	1.61733	1.57647	0.761663	0.521672	0.698773	0.00148253	-1.16053	down
Zjn_sc00017.1.g02340.1.sm.mkhc	344	446	438	1528	1591	1469	5.21877	7.17826	6.27856	22.1364	21.1875	21.5335	1.88552e-20	1.94311	up
Zjn_sc00017.1.g02520.1.am.mk	8401	5773	7632	4405	1721	3132	314.362	228.675	270.041	157.079	56.3393	112.831	0.000559083	-1.16705	down
Zjn_sc00017.1.g02800.1.sm.mk	215	228	167	80	82	58	2.79259	3.15055	2.05317	0.976896	0.939823	0.734877	2.39e-05	-1.44485	down
Zjn_sc00017.1.g03110.1.sm.mk	7641	7638	7272	2178	3088	1837	281.852	299.082	254.962	77.1744	99.9638	65.8189	3.99274e-18	-1.64058	down
Zjn_sc00017.1.g03220.1.am.mk	4746	3445	2909	1820	1280	865	60.4112	47.1526	36.093	22.4737	14.4995	11.1406	0.000917117	-1.45092	down
Zjn_sc00017.1.g03280.1.sm.mk	523	619	379	96	197	103	7.66797	9.60206	5.2522	1.33027	2.52308	1.44592	5.92433e-05	-1.93589	down
Zjn_sc00017.1.g03330.1.sm.mkhc	2963	3290	2925	1124	1248	1004	52.9781	62.3269	49.4613	19.1345	19.4689	17.2692	6.33804e-13	-1.40877	down
Zjn_sc00017.1.g03440.1.am.mk	25	6	11	40	59	44	0.162759	0.038439	0.064835	0.250547	0.343373	0.280374	0.00656628	1.80672	up
Zjn_sc00017.1.g03490.1.am.mk	162	108	78	505	427	431	5.83166	4.08484	2.63646	17.3138	13.4302	14.945	4.07843e-14	2.00524	up
Zjn_sc00017.1.g03570.1.sm.mkhc	1630	1348	1567	3351	3519	3339	25.6136	22.4308	23.2953	50.217	48.4246	50.5638	3.35068e-10	1.21329	up
Zjn_sc00017.1.g03770.1.am.mk	976	953	1047	2184	3398	1819	5.86357	6.05743	5.94759	12.5047	17.8653	10.5206	0.000213796	1.34128	up
Zjn_sc00017.1.g03790.1.sm.mkhc	964	772	688	373	406	362	7.77126	6.62736	5.27269	2.88854	2.86863	2.79112	4.34249e-05	-1.05112	down
Zjn_sc00017.1.g03860.1.sm.mkhc	2285	2763	2460	953	1070	664	53.9236	69.0515	54.8884	21.4265	22.0965	15.0934	1.35046e-11	-1.45382	down
Zjn_sc00017.1.g03880.1.sm.mkhc	189	145	140	396	286	321	1.71078	1.38446	1.19687	3.4169	2.27125	2.8009	8.55955e-05	1.12841	up
Zjn_sc00017.1.g03890.1.am.mk	120	101	110	34	52	35	1.47687	1.31793	1.28496	0.399564	0.561345	0.409429	0.00126637	-1.42025	down
Zjn_sc00017.1.g03970.1.sm.mkhc	22	27	25	249	226	247	0.670333	0.904468	0.732159	7.52244	6.27722	7.54658	3.60699e-20	3.33099	up
Zjn_sc00017.1.g03980.1.sm.mkhc	8	14	10	77	129	134	0.379415	0.734509	0.447706	3.64388	5.60008	6.44806	1.06641e-10	3.43988	up
Zjn_sc00017.1.g04040.1.sm.mk	2056	2874	2322	1054	1232	1131	102.716	152.065	109.706	50.1901	53.865	54.4019	0.000210918	-1.05163	down
Zjn_sc00017.1.g04150.1.am.mk	925	690	717	1982	2235	2062	32.7803	25.8988	24.0328	66.9613	69.3898	70.4062	1.82984e-13	1.46954	up
Zjn_sc00017.1.g04430.1.am.mk	1227	1139	1141	2364	2722	2066	21.3228	21.1221	18.9007	39.174	41.3639	34.7147	6.33515e-08	1.06366	up
Zjn_sc00017.1.g04520.1.sm.mk	94	101	119	51	41	44	2.33344	2.65266	2.7907	1.19206	0.887246	1.04983	0.00865955	-1.15438	down
Zjn_sc00017.1.g04970.1.am.mk	463	465	634	233	289	227	46.0951	46.1646	55.7499	21.4141	25.5319	19.754	4.88408e-05	-1.01437	down
Zjn_sc00017.1.g05040.1.sm.mk	33	18	22	158	261	226	0.575713	0.32097	0.367613	2.6757	4.05907	3.85947	3.52816e-16	3.18175	up
Zjn_sc00017.1.g05410.1.es.mkhc	139	110	118	43	51	28	4.03853	3.37125	3.22959	1.17776	1.28209	0.772033	0.000235407	-1.55913	down
Zjn_sc00017.1.g05430.1.sm.mkhc	85	69	133	209	183	259	1.93691	1.66209	2.86442	4.54642	3.66345	5.70063	0.000477337	1.25505	up
Zjn_sc00017.1.g05440.1.am.mk	34	20	31	77	104	47	1.26758	0.760771	1.07728	2.73374	3.37914	1.6816	0.00446638	1.4568	up
Zjn_sc00017.1.g05500.1.am.mkhc	2793	2749	2235	1324	1328	970	48.8157	51.1241	37.0266	22.1859	20.1823	16.4515	5.02156e-06	-1.07211	down
Zjn_sc00017.1.g05700.1.sm.mkhc	725	501	786	269	200	285	16.6013	12.1394	17.0364	5.86721	4.00713	6.27468	1.88169e-07	-1.34978	down
Zjn_sc00017.1.g06080.1.am.mkhc	2243	1815	2304	9209	10902	9114	42.889	37.1189	42.2607	171.82	184.267	172.417	1.01506e-32	2.24393	up
Zjn_sc00017.1.g06320.1.sm.mkhc	99	168	138	64	58	33	1.38794	2.49701	1.82639	0.852449	0.701511	0.446523	0.00235774	-1.35756	down
Zjn_sc00017.1.g06710.1.sm.mkhc	135	164	173	34	44	42	1.54629	1.91946	1.82637	0.36135	0.407726	0.455593	6.05103e-07	-1.93323	down
Zjn_sc00017.1.g06810.1.sm.mk	816	906	805	377	417	316	36.5576	42.9661	34.0972	16.0862	16.3185	13.6338	4.26723e-07	-1.15408	down
Zjn_sc00017.1.g07130.1.sm.mkhc	69	70	66	203	232	100	1.48845	1.59473	1.3269	4.15982	4.3719	2.06222	0.0046027	1.40685	up
Zjn_sc00017.1.g07160.1.sm.mkhc	256	87	94	301	328	321	6.5008	2.32956	2.23914	7.27327	7.27672	7.84943	0.00412566	1.16009	up
Zjn_sc00017.1.g07180.1.am.mk	56	40	27	200	178	73	1.12899	0.867414	0.489559	4.02082	3.23026	1.4721	0.00751469	1.89176	up
Zjn_sc00017.1.g07420.1.am.mk	3282	2918	3078	6549	7897	6036	67.4148	64.8366	60.5656	136.2	150.719	127.178	2.37896e-10	1.17908	up
Zjn_sc00017.1.g07530.1.sm.mk	17	17	45	110	81	158	0.481201	0.491146	1.20553	3.01915	2.02887	4.36596	0.00100877	2.23837	up
Zjn_sc00017.1.g07640.1.am.mk	36957	31041	35401	92688	107152	88779	561.143	498.38	509.415	1327.35	1430.26	1286.74	4.4335e-17	1.52207	up
Zjn_sc00017.1.g07730.1.sm.mkhc	315	307	155	67	66	66	4.18881	4.32175	1.94624	0.849887	0.759686	0.837818	0.00160944	-1.93996	down
Zjn_sc00017.1.g07750.1.sm.mkhc	8338	8426	7266	25405	20417	20787	260.418	278.646	214.571	756.272	558.095	625.244	4.7787e-12	1.51236	up
Zjn_sc00018.1.g00070.1.am.mkhc	2996	2363	2530	7640	6920	7700	44.2172	38.5872	36.9673	106.283	92.5182	108.565	1.5638e-16	1.5446	up
Zjn_sc00018.1.g00130.1.am.mk	1904	1382	1795	2958	3660	3417	13.478	10.3625	12.0174	19.9605	22.6847	23.3031	1.24168e-07	1.02844	up
Zjn_sc00018.1.g00210.1.sm.mkhc	178	111	203	51	117	62	2.66221	1.74985	2.87041	0.719183	1.52791	0.881994	0.00982589	-1.06188	down
Zjn_sc00018.1.g00230.1.am.mk	820	962	1160	471	524	415	10.8919	13.5395	14.5947	5.9611	6.10156	5.30205	4.00718e-06	-1.01711	down
Zjn_sc00018.1.g00250.1.sm.mk	135	94	171	292	265	259	2.13117	1.58036	2.56657	4.41589	3.678	3.95577	0.000328256	1.08979	up
Zjn_sc00018.1.g00280.1.sm.mkhc	2158	1756	582	241	247	79	25.8633	24.6836	5.99426	3.35365	2.37406	0.563728	0.0056014	-2.99018	down
Zjn_sc00018.1.g00450.1.am.mk	291	304	466	921	795	966	3.98629	4.47776	6.52232	12.9615	9.44984	13.7677	3.99333e-09	1.40182	up
Zjn_sc00018.1.g00530.1.am.mkhc	48	56	40	18	10	6	1.00154	1.24055	0.789645	0.357285	0.182884	0.110322	0.00282242	-2.05053	down
Zjn_sc00018.1.g00540.1.am.mk	2188	2327	2199	472	612	474	22.693	25.5644	21.5771	4.66794	5.55443	4.72739	2.90822e-24	-2.0742	down
Zjn_sc00018.1.g00890.1.sm.mkhc	997	672	855	3344	2643	3980	8.41629	5.51979	6.59735	23.615	17.3408	27.2651	2.77569e-07	2.0418	up
Zjn_sc00018.1.g01120.1.am.mk	82	75	86	368	369	330	1.98159	1.90607	1.97173	8.49868	7.83103	7.69905	5.24096e-14	2.1795	up
Zjn_sc00018.1.g01180.1.am.mk	47	56	45	406	314	336	0.772721	0.980826	0.701458	6.45287	4.58078	4.87556	4.62888e-21	2.87595	up
Zjn_sc00018.1.g01290.1.am.mk	29	32	35	147	101	122	0.321372	0.381234	0.366956	1.56758	0.986706	1.3174	2.73448e-06	2.00062	up
Zjn_sc00018.1.g01340.1.sm.mkhc	163	113	135	52	106	34	3.99661	2.92882	3.12558	1.21534	2.27709	0.78533	0.00920975	-1.08496	down
Zjn_sc00018.1.g01500.1.am.mk	176	185	235	75	33	51	3.64223	4.04783	4.59849	1.46707	0.593093	1.00389	1.11089e-07	-1.83951	down
Zjn_sc00018.1.g01560.1.am.mkhc	452	681	514	53	79	131	4.88322	7.8001	5.25775	0.538381	0.742294	1.35615	1.64604e-08	-2.60029	down
Zjn_sc00018.1.g01620.1.sm.mkhc	204	186	300	433	620	422	4.97081	4.79437	6.93201	10.0936	13.2652	9.92128	6.1439e-06	1.14214	up
Zjn_sc00018.1.g01940.1.am.mkhc	320	424	343	117	104	77	2.30777	3.39038	2.49607	0.869004	0.589723	0.537007	2.72161e-09	-1.83459	down
Zjn_sc00018.1.g02060.1.sm.mkhc	1377	1677	1612	3406	3418	3308	17.8053	23.0739	19.74	42.1708	38.8068	41.4502	1.76111e-09	1.16077	up
Zjn_sc00018.1.g02110.1.am.mkhc	1609	1436	1927	5834	5148	3437	46.6058	44.0158	52.7524	161.042	130.503	95.8627	5.25318e-06	1.58167	up
Zjn_sc00018.1.g02170.1.sm.mk	400	691	264	28	32	10	37.445	68.5049	23.3624	2.4155	2.56051	0.898725	0.000140977	-4.28228	down
Zjn_sc00018.1.g02180.1.am.mk	71	20	43	102	130	84	0.899967	0.269505	0.5096	1.24138	1.45689	1.0267	0.00343025	1.28098	up
Zjn_sc00018.1.g02190.1.am.mk	232	179	316	565	1001	662	4.51913	3.69395	5.81431	10.495	17.0615	12.4119	7.19365e-06	1.66037	up
Zjn_sc00018.1.g02290.1.am.mk	2848	3019	2405	472	659	524	114.557	107.503	91.429	18.0875	23.1986	20.2843	4.32716e-17	-2.29348	down
Zjn_sc00018.1.g02600.1.sm.mkhc	706	620	695	328	345	265	7.78643	7.79321	7.32055	3.49644	3.42638	2.841	6.64274e-06	-1.06724	down
Zjn_sc00018.1.g02880.1.am.mk	1465	1783	1518	925	463	701	20.1452	25.9473	20.0902	16.0634	5.68074	12.4707	0.000124	-1.13701	down
Zjn_sc00018.1.g02910.1.am.mk	185	220	196	75	116	68	2.43863	3.06291	2.40901	0.945253	1.32693	0.83934	0.000513117	-1.19143	down
Zjn_sc00018.1.g02920.1.am.mk	1016	1113	1018	345	393	333	8.47055	10.0034	8.12195	2.77913	2.86378	2.76168	5.17617e-12	-1.51916	down
Zjn_sc00018.1.g03010.1.sm.mkhc	224	201	208	68	97	83	3.61183	3.42899	3.1607	1.04259	1.36456	1.2856	8.17138e-05	-1.31482	down
Zjn_sc00018.1.g03100.1.am.mk	12	6	26	93	65	113	0.2053	0.112955	0.427977	1.58489	1.00349	1.93212	4.78596e-06	2.72362	up
Zjn_sc00018.1.g03290.1.sm.mkhc	59	78	81	23	29	5	1.21735	1.69732	1.57316	0.44919	0.52008	0.098278	0.000567211	-1.92216	down
Zjn_sc00018.1.g03380.1.sm.mkhc	193	289	264	99	132	68	2.95323	4.67545	3.81203	1.43383	1.75983	0.997768	0.000144444	-1.2954	down
Zjn_sc00018.1.g03670.1.sm.mkhc	1752	1981	1719	709	1020	664	23.0055	27.3905	21.3199	8.73049	11.6339	8.29992	1.8061e-08	-1.16255	down
Zjn_sc00018.1.g03760.1.sm.mk	78	83	80	281	309	355	0.632458	0.711626	0.612833	2.18259	2.2072	2.79149	1.18817e-11	2.01644	up
Zjn_sc00018.1.g03770.1.am.mk	36	13	17	81	74	45	0.343174	0.126501	0.15315	0.749631	0.631078	0.419907	0.00302752	1.63599	up
Zjn_sc00018.1.g03890.1.am.mkhc	128	98	144	547	499	528	3.11999	2.53182	3.32599	12.7384	10.6681	12.4226	1.57472e-16	2.14549	up
Zjn_sc00018.1.g03900.1.am.mk	35	43	60	144	91	124	0.390462	0.509781	0.639999	1.56232	0.905502	1.72883	0.000591704	1.44562	up
Zjn_sc00018.1.g04420.1.am.mkhc	8093	5710	7665	20300	21144	21833	65.3084	47.9652	59.1801	155.339	147.706	169.189	2.09436e-18	1.61093	up
Zjn_sc00018.1.g04530.1.am.mk	690	411	648	1360	1644	1488	14.1778	8.94457	12.5877	26.6443	29.5697	29.447	1.1746e-11	1.41144	up
Zjn_sc00018.1.g04620.1.sm.mkhc	1012	1160	825	182	239	102	26.8279	32.5656	20.6715	4.58202	5.53229	2.58942	7.69207e-11	-2.50655	down
Zjn_sc00018.1.g04690.1.sm.mkhc	464	410	333	1112	1145	985	10.8469	10.3381	7.24911	25.2853	24.1494	21.937	1.18817e-11	1.4588	up
Zjn_sc00018.1.g04700.1.am.mk	176	85	84	462	513	371	4.74217	2.43975	2.1503	11.9328	12.2214	9.62142	6.25841e-14	1.99615	up
Zjn_sc00018.1.g04740.1.am.mk	3040	3132	2378	1221	1192	1034	46.4509	52.1628	34.4334	18.0222	16.3601	15.2896	1.77991e-06	-1.27821	down
Zjn_sc00018.1.g04810.1.am.mk	3147	3608	3680	944	1096	599	95.3942	109.387	98.3161	27.3199	29.1388	17.4351	2.97506e-23	-1.9535	down
Zjn_sc00018.1.g04940.1.sm.mk	123	192	148	35	37	14	6.98627	11.5281	7.95629	1.88417	1.83577	0.738855	3.26077e-07	-2.41191	down
Zjn_sc00018.1.g04970.1.sm.mkhc	817	862	896	344	333	225	9.69556	10.9113	10.1369	3.88041	3.4835	2.6026	8.6515e-11	-1.47642	down
Zjn_sc00018.1.g05220.1.am.mk	737	629	413	177	205	141	6.79323	6.13931	3.59577	1.554	1.65426	1.24983	0.000239767	-1.74474	down
Zjn_sc00018.1.g05240.1.am.mk	123	99	121	40	59	20	2.19109	1.86818	2.03816	0.679051	0.909679	0.341094	0.000593153	-1.50584	down
Zjn_sc00018.1.g05280.1.am.mk	280	182	201	604	804	474	6.23037	4.28989	4.21812	12.8285	15.6743	10.1546	3.88098e-07	1.53469	up
Zjn_sc00018.1.g05560.1.sm.mkhc	555	420	435	1244	1233	1506	4.36787	3.5189	3.12077	9.05788	8.54949	11.2988	1.50414e-10	1.54658	up
Zjn_sc00018.1.g05620.1.am.mkhc	398	393	434	145	170	129	6.02844	6.29491	6.20681	2.08062	2.24309	1.87942	1.27736e-07	-1.42548	down
Zjn_sc00018.1.g06240.1.sm.mkhc	1647	1500	1683	3271	3471	4509	13.4846	12.8431	12.891	25.3021	24.602	35.085	1.58478e-05	1.27272	up
Zjn_sc00018.1.g06300.1.sm.mk	632	613	961	293	157	105	7.46382	7.66651	10.7309	3.29303	1.62281	1.19179	1.39291e-07	-1.93217	down
Zjn_sc00018.1.g06370.1.sm.mkhc	973	746	439	76	116	70	10.3833	8.4304	4.42526	0.770436	1.08406	0.715158	2.84723e-05	-3.02953	down
Zjn_sc00018.1.g06710.1.am.mk	156	191	143	44	39	33	8.93865	11.6245	7.75113	2.37024	1.92146	1.79914	1.09949e-07	-2.04604	down
Zjn_sc00018.1.g06750.1.sm.mk	971	668	1018	416	261	373	16.4989	12.0146	16.3612	6.73003	3.8826	6.0993	1.32846e-06	-1.27305	down
Zjn_sc00018.1.g06980.1.sm.mkhc	1948	1896	1281	396	384	158	73.0124	75.2168	45.3872	14.1196	12.5808	5.69611	5.94151e-08	-2.4343	down
Zjn_sc00018.1.g06990.1.sm.mk	502	431	402	190	182	73	7.40055	6.42232	5.4257	2.64982	2.3999	1.0068	6.75046e-08	-1.56069	down
Zjn_sc00018.1.g07010.1.am.mkhc	162	140	149	83	55	67	1.70832	1.5589	1.48781	0.836371	0.506886	0.675372	0.00372008	-1.08474	down
Zjn_sc00018.1.g07020.1.am.mk	709	548	680	288	280	267	18.8413	15.4247	17.084	7.28298	6.51304	6.82184	9.14507e-07	-1.16564	down
Zjn_sc00018.1.g07050.1.am.mk	217	217	263	495	538	444	22.0313	23.3345	25.2461	47.9726	47.8695	43.5195	7.56417e-06	1.128	up
Zjn_sc00018.1.g07120.1.am.mk	647	670	410	30	117	60	7.57263	8.30718	4.53107	0.328872	1.19406	0.671457	2.53101e-08	-3.06218	down
Zjn_sc00018.1.g07210.1.am.mk	518	493	748	374	180	259	10.2242	10.3219	13.9821	7.03406	3.10036	4.93088	0.00130904	-1.04294	down
Zjn_sc00018.1.g07280.1.sm.mk	632	695	699	251	405	286	11.3231	13.1917	11.8424	4.28642	6.35039	4.93383	6.93318e-06	-1.07415	down
Zjn_sc00018.1.g07580.1.sm.mk	177	138	80	1	21	14	6.9513	5.76234	2.9575	0.035888	0.70701	0.509655	1.07074e-05	-3.45625	down
Zjn_sc00018.1.g07600.1.sm.mk	1446	1711	1394	695	674	699	27.6644	33.7933	24.9121	12.7036	11.233	12.3136	6.56401e-07	-1.09926	down
Zjn_sc00018.1.g07680.1.am.mk	86	88	108	156	228	253	2.98625	3.26884	3.57879	5.21566	6.98362	8.52639	0.000294092	1.22557	up
Zjn_sc00019.1.g00030.1.am.mkhc	186	194	380	29	32	60	2.1701	2.40157	4.19505	0.321698	0.320749	0.665837	5.13216e-05	-2.56861	down
Zjn_sc00019.1.g00100.1.sm.mkhc	2809	3260	2845	735	1071	1340	26.7827	32.9321	25.6391	6.66843	8.91926	12.295	2.05266e-09	-1.45987	down
Zjn_sc00019.1.g00120.1.sm.mkhc	541	502	522	1447	960	1357	5.01789	4.92932	4.58883	12.7961	7.80509	12.1321	0.000139676	1.32149	up
Zjn_sc00019.1.g00270.1.am.mk	1045	994	981	403	435	472	20.2233	20.3907	17.9707	7.43855	7.36295	8.79844	1.18575e-07	-1.16072	down
Zjn_sc00019.1.g00550.1.sm.mkhc	2857	3323	4887	1151	1973	1324	65.7552	77.8851	102.249	25.7506	38.1836	29.789	0.000163662	-1.27296	down
Zjn_sc00019.1.g00800.1.sm.mkhc	63188	74966	81347	13820	20051	15043	1809.94	2268.59	2208.47	377.098	503.397	415.906	6.30292e-31	-2.12974	down
Zjn_sc00019.1.g00820.1.am.mk	6447	6226	9806	2163	3961	3811	169.838	173.645	244.211	54.2962	91.3253	96.6749	0.00033265	-1.12544	down
Zjn_sc00019.1.g01000.1.sm.mk	1173	1183	735	185	348	93	48.3427	50.229	28.5343	6.66444	12.2949	3.34774	9.28699e-06	-2.30994	down
Zjn_sc00019.1.g01010.1.sm.mk	98	118	82	20	52	34	5.56604	7.09327	4.39594	1.03089	2.57357	1.85425	0.00157964	-1.47871	down
Zjn_sc00019.1.g01440.1.sm.mkhc	29	9	32	149	209	234	0.511831	0.16769	0.521032	2.50417	3.22786	3.97686	9.21126e-13	3.15231	up
Zjn_sc00019.1.g01730.1.sm.mk	3012	2882	3033	7036	7907	5523	103.47	104.813	98.5236	230.375	237.754	182.712	3.3449e-11	1.23266	up
Zjn_sc00019.1.g01740.1.am.mk	383	195	317	753	760	625	14.403	7.73723	11.2782	26.9894	25.0135	22.6372	2.21737e-08	1.30614	up
Zjn_sc00019.1.g01750.1.am.mk	127	13	32	252	333	369	5.42514	0.544102	1.25583	10.2342	12.4379	15.1552	4.52105e-08	2.51906	up
Zjn_sc00019.1.g02120.1.am.mk	116	230	60	3	4	5	2.85952	6.02142	1.39891	0.047839	0.069514	0.096676	0.00148498	-5.0696	down
Zjn_sc00019.1.g02350.1.am.mk	490	357	336	717	1333	764	10.1845	7.86852	6.61211	14.2157	24.2833	15.3188	0.00268234	1.27061	up
Zjn_sc00019.1.g02930.1.am.mk	175	106	273	36	32	33	2.88492	1.85719	4.26105	0.559801	0.454907	0.512418	0.000274628	-2.38268	down
Zjn_sc00019.1.g03180.1.am.mk	818	904	811	239	296	217	16.0736	18.8011	15.0474	4.46961	5.09386	4.10885	8.90089e-14	-1.72106	down
Zjn_sc00019.1.g03410.1.sm.mkhc	3636	3407	2666	1174	1285	990	58.1214	57.7155	40.323	17.9622	17.9781	15.1923	2.01188e-07	-1.46391	down
Zjn_sc00019.1.g03570.1.sm.mkhc	136	184	227	353	400	394	1.95437	2.8083	3.0997	4.85833	5.05383	5.48309	3.54115e-05	1.11868	up
Zjn_sc00019.1.g03580.1.sm.mkhc	467	513	473	194	230	151	20.0472	23.3223	19.2062	7.90751	8.63084	6.22512	4.17787e-07	-1.30748	down
Zjn_sc00019.1.g03710.1.sm.mkhc	33	55	53	263	243	425	0.732162	1.28618	1.10183	5.58957	4.74575	9.12492	2.03834e-05	2.78105	up
Zjn_sc00019.1.g04020.1.sm.mkhc	29	32	37	107	166	73	0.419938	0.565894	0.509395	1.52155	2.15963	1.00499	0.000478003	1.84499	up
Zjn_sc00019.1.g04350.1.sm.mk	151	99	65	4	19	7	4.05199	2.81313	1.64351	0.077836	0.439906	0.180887	6.70465e-05	-3.40292	down
Zjn_sc00020.1.g00030.1.sm.mkhc	151	228	244	60	121	50	6.46406	10.3621	9.89745	2.43942	4.52587	2.05784	0.000461722	-1.41308	down
Zjn_sc00020.1.g00170.1.am.mk	161	163	67	9	15	7	6.65182	7.14303	2.60829	0.325789	0.520882	0.266586	6.43221e-05	-3.6598	down
Zjn_sc00020.1.g00430.1.am.mkhc	147	118	130	283	263	278	1.84	1.56264	1.54048	3.3897	2.89432	3.3683	0.000205158	1.1084	up
Zjn_sc00020.1.g00660.1.sm.mk	75	104	73	46	18	29	0.757264	1.12185	0.696519	0.438068	0.16029	0.28154	0.00472407	-1.38854	down
Zjn_sc00020.1.g00810.1.sm.mkhc	26	13	17	42	67	54	0.860161	0.421023	0.505419	1.30471	1.92342	1.71697	0.00977019	1.57948	up
Zjn_sc00020.1.g00840.1.sm.mkhc	97	78	62	27	15	13	2.62	2.22641	1.59432	0.685504	0.347726	0.32361	0.000103254	-2.06755	down
Zjn_sc00020.1.g00850.1.sm.mkhc	1265	1335	934	120	145	98	28.777	31.7892	20.3249	2.20047	2.76837	1.8997	9.91544e-15	-3.26118	down
Zjn_sc00020.1.g00900.1.es.mkhc	354	225	264	816	823	830	5.63952	3.2876	3.34275	10.4094	9.76475	11.7068	2.61798e-12	1.5968	up
Zjn_sc00020.1.g00930.1.sm.mk	1897	1945	1451	551	777	294	44.4463	48.129	32.1089	12.2827	15.8206	6.59296	1.6199e-06	-1.69629	down
Zjn_sc00020.1.g01000.1.sm.mkhc	386	385	419	1167	1215	1270	3.63888	3.84178	3.73759	10.4875	10.0271	11.5378	8.35984e-15	1.66466	up
Zjn_sc00020.1.g01020.1.am.mk	482	394	379	111	75	66	4.61034	4.73127	3.49986	1.20485	0.714518	0.531531	4.80152e-16	-2.27304	down
Zjn_sc00020.1.g01140.1.sm.mkhc	61	57	67	168	103	132	0.572047	0.577755	0.630364	1.54652	0.933176	1.28584	0.00278408	1.18114	up
Zjn_sc00020.1.g01230.1.am.mk	58	89	97	21	45	28	0.957925	1.56044	1.51892	0.333971	0.648623	0.45066	0.0080814	-1.34796	down
Zjn_sc00020.1.g01480.1.sm.mk	15	19	6	48	76	40	0.34274	0.471437	0.138809	1.09763	1.62445	0.940001	0.00100384	2.02959	up
Zjn_sc00020.1.g01580.1.sm.mkhc	789	915	647	151	182	88	17.18	21.0949	13.3298	3.118	3.4662	1.84281	1.59882e-10	-2.46574	down
Zjn_sc00020.1.g01630.1.am.mk	46	56	63	11	16	5	3.04483	3.94237	3.94846	0.684163	0.87578	0.303396	0.000377246	-2.34668	down
Zjn_sc00020.1.g01700.1.am.mk	42	41	49	99	127	91	0.676543	0.690401	0.746568	1.51186	1.78948	1.40305	0.00277886	1.30278	up
Zjn_sc00020.1.g01770.1.sm.mk	33	29	31	64	77	86	1.28072	1.18857	1.1427	2.34989	2.60906	3.22745	0.0092634	1.33372	up
Zjn_sc00020.1.g02030.1.sm.mk	867	899	1122	434	659	295	25.7587	27.3352	29.7873	11.5761	16.3938	8.48302	1.63526e-05	-1.029	down
Zjn_sc00020.1.g02120.1.sm.mkhc	444	466	541	208	273	155	14.5121	16.1354	16.716	6.46301	7.8027	4.86059	7.049e-06	-1.15718	down
Zjn_sc00020.1.g02130.1.am.mkhc	57816	45150	62468	110130	105621	106460	495.592	409.75	506.178	899.489	792.185	878.396	4.01893e-08	1.01502	up
Zjn_sc00020.1.g02310.1.am.mk	124	161	88	18	34	20	2.30414	3.17946	1.5371	0.310268	0.54961	0.32165	8.19168e-05	-2.36678	down
Zjn_sc00020.1.g02350.1.sm.mk	4385	3920	4330	1666	1298	1764	105.729	100.078	98.6903	38.2699	27.3856	40.951	6.02934e-13	-1.36289	down
Zjn_sc00020.1.g02490.1.sm.mkhc	4282	3831	4353	9378	9542	11383	41.8797	38.9885	40.0153	85.1478	80.3617	105.442	1.25725e-10	1.33269	up
Zjn_sc00020.1.g02590.1.sm.mkhc	266	289	461	1045	651	1211	3.90539	4.50703	6.40961	14.6705	8.38248	17.1694	0.00281678	1.5936	up
Zjn_sc00020.1.g02810.1.am.mk	168	165	73	14	22	0	4.46265	4.6277	1.82013	0.345329	0.510576	0	5.70934e-05	-3.5228	down
Zjn_sc00020.1.g02870.1.am.mk	2171	2339	1979	4736	6457	3459	136.62	155.845	117.776	284.122	355.672	209.636	0.000305387	1.19599	up
Zjn_sc00020.1.g02920.1.sm.mkhc	5829	4317	3970	23715	27044	22767	109.877	88.0727	70.8376	433.05	446.051	410.786	9.48034e-39	2.41574	up
Zjn_sc00020.1.g03210.1.am.mk	166	230	194	64	72	55	1.78594	2.62276	2.05061	0.635967	0.6945	0.611125	4.62143e-06	-1.59562	down
Zjn_sc00020.1.g03340.1.sm.mkhc	8047	5931	8823	16336	13860	18243	53.5876	42.2512	60.327	101.869	78.4601	115.043	1.39528e-05	1.14942	up
Zjn_sc00020.1.g03610.1.sm.mk	49	54	47	129	125	104	0.368867	0.416984	0.319025	0.958289	0.824947	0.747812	0.00166984	1.29069	up
Zjn_sc00020.1.g03770.1.sm.mk	57	70	58	20	11	6	0.649213	0.836668	0.624137	0.213236	0.101071	0.055682	0.000196831	-2.2865	down
Zjn_sc00020.1.g04210.1.sm.mkhc	1228	1726	1712	757	810	501	65.0175	96.7911	85.7064	38.1929	37.513	25.5313	3.38499e-05	-1.14075	down
Zjn_sc00020.1.g04240.1.am.mkhc	377	315	432	160	165	134	9.41354	9.16806	11.6415	4.32641	4.29879	3.67202	5.28396e-06	-1.24423	down
Zjn_sc00020.1.g04880.1.sm.mk	150	143	147	43	62	70	7.66495	7.75099	7.08223	2.06588	2.77698	3.4279	0.000784885	-1.28571	down
Zjn_sc00020.1.g05030.1.sm.mkhc	703	620	878	1406	1747	1741	7.7842	8.54659	10.4373	14.2099	17.1293	26.28	5.10261e-09	1.20515	up
Zjn_sc00020.1.g05050.1.sm.mkhc	43	36	45	388	213	292	0.673579	0.596401	0.666354	7.06169	3.69649	5.02686	4.97718e-07	2.9097	up
Zjn_sc00020.1.g05230.1.sm.mk	321	299	240	71	131	71	2.27479	2.24177	1.60858	0.477224	0.809786	0.480078	1.71396e-07	-1.64017	down
Zjn_sc00020.1.g05680.1.sm.mkhc	760	1009	1031	398	637	287	29.8905	42.0176	38.0518	14.8138	21.8721	10.7705	0.000484869	-1.06113	down
Zjn_sc00020.1.g05690.1.am.mk	251	232	381	817	847	1028	3.98954	3.91325	5.71531	12.3943	11.7935	15.7406	1.13104e-10	1.70369	up
Zjn_sc00020.1.g05920.1.am.mkhc	177	176	145	69	73	36	1.98477	2.08586	1.54075	0.735911	0.710317	0.385238	8.47927e-05	-1.46181	down
Zjn_sc00020.1.g06290.1.am.mk	7339	7607	7474	3209	3963	2388	70.0986	76.2648	67.0538	28.783	33.3471	21.8188	2.24629e-10	-1.20032	down
Zjn_sc00020.1.g06310.1.am.mk	249	409	230	57	130	62	2.40654	4.20879	2.14416	0.579451	1.12892	0.622087	0.00474055	-1.83537	down
Zjn_sc00020.1.g06460.1.sm.mkhc	293	378	425	979	686	901	1.98259	1.98189	2.6069	4.62658	3.07504	4.49635	4.69786e-05	1.28465	up
Zjn_sc00021.1.g00010.1.sm.mk	639	609	532	261	268	227	4.81859	5.15359	3.97874	1.98788	1.83824	1.69937	9.11705e-07	-1.20017	down
Zjn_sc00021.1.g00020.1.sm.mk	135	158	131	86	67	31	9.14267	11.3617	8.41835	5.5517	3.95805	2.01503	0.00273926	-1.1771	down
Zjn_sc00021.1.g00670.1.sm.mkhc	395	479	469	183	262	136	7.62706	9.7934	8.55345	3.36591	4.42987	2.51534	7.58998e-06	-1.18435	down
Zjn_sc00021.1.g00710.1.sm.mkhc	6108	5234	4915	1926	2178	1381	102.779	95.5595	92.1109	35.9012	37.8756	26.575	7.29302e-13	-1.5378	down
Zjn_sc00021.1.g00840.1.sm.mk	291	173	304	528	481	651	3.2525	2.0456	3.22628	5.64938	4.71459	7.0312	0.000204083	1.17809	up
Zjn_sc00021.1.g00930.1.am.mk	69	70	40	12	23	25	1.21643	1.31458	0.659038	0.189374	0.355696	0.416331	0.00929882	-1.55183	down
Zjn_sc00021.1.g01100.1.sm.mkhc	5090	4176	3896	12166	14916	10092	72.4358	60.8338	50.8465	160.222	177.075	131.591	9.29112e-15	1.52761	up
Zjn_sc00021.1.g01110.1.am.mk	72	100	94	41	40	28	0.493445	0.726326	0.601704	0.265853	0.2355	0.180868	0.00958615	-1.25204	down
Zjn_sc00021.1.g01480.1.sm.mkhc	11620	8031	10421	2654	1538	2733	158.947	116.577	134.916	34.559	18.4412	36.1874	1.27443e-14	-2.05229	down
Zjn_sc00021.1.g01530.1.sm.mkhc	4378	3937	3679	10140	10362	9115	90.828	86.2513	72.9304	198.969	189.701	183.817	3.40175e-13	1.34211	up
Zjn_sc00021.1.g01770.1.am.mk	37	37	30	179	184	200	0.369035	0.393026	0.27306	1.72289	1.63315	1.96564	2.14156e-11	2.47548	up
Zjn_sc00021.1.g01970.1.sm.mkhc	2432	2738	3092	5502	4725	6436	28.4506	33.1731	33.0535	59.3018	48.8485	70.2915	0.000102041	1.0685	up
Zjn_sc00021.1.g02000.1.sm.mkhc	21	9	0	118	59	185	0.469929	0.194166	0	2.53558	1.15031	4.02355	0.00155624	3.63283	up
Zjn_sc00021.1.g02080.1.sm.mkhc	1012	977	931	379	429	427	19.4637	19.9098	16.9345	6.9418	7.218	7.95654	5.58431e-08	-1.20075	down
Zjn_sc00021.1.g02210.1.sm.mkhc	21062	25616	20828	6201	7712	4854	459.457	591.813	429.802	128.9	147.124	101.82	7.95743e-12	-1.82217	down
Zjn_sc00022.1.g00020.1.am.mk	31	15	25	87	83	72	0.762317	0.377654	0.572272	2.05192	1.80181	1.70616	0.000377791	1.82101	up
Zjn_sc00022.1.g00140.1.sm.mkhc	931	1106	780	388	345	314	19.3458	25.2736	15.1224	7.31174	6.23354	5.93106	1.88678e-05	-1.39556	down
Zjn_sc00022.1.g00260.1.am.mk	128	113	97	421	438	447	5.21914	4.89539	3.73295	16.4387	15.7028	17.6214	1.32995e-13	1.9888	up
Zjn_sc00022.1.g00270.1.sm.mk	234	255	117	1014	1367	857	18.6644	21.5327	8.79989	77.3452	95.7284	66.0136	1.33065e-15	2.42616	up
Zjn_sc00022.1.g00330.1.sm.mkhc	763	800	916	320	498	331	11.6694	12.9528	13.2445	4.65497	6.6638	4.87018	2.70016e-06	-1.07572	down
Zjn_sc00022.1.g00480.1.am.mkhc	1260	1222	1656	2899	2248	2895	11.2842	11.6121	14.0069	24.7824	17.6165	24.9407	6.58556e-05	1.01986	up
Zjn_sc00022.1.g00530.1.sm.mkhc	0	11	3	81	82	80	0	0.235847	0.041479	1.66551	1.54167	1.66078	2.7029e-11	4.11503	up
Zjn_sc00022.1.g00690.1.am.mkhc	1119	835	1174	3099	2877	3230	17.9658	15.4911	17.1362	50.2055	42.5735	51.4214	1.86565e-16	1.61358	up
Zjn_sc00022.1.g00710.1.sm.mkhc	11	19	18	74	60	78	0.164907	0.305661	0.256988	1.06152	0.809302	1.20034	8.79622e-05	2.19397	up
Zjn_sc00022.1.g00750.1.am.mkhc	33	45	56	116	98	114	0.41608	0.595026	0.662175	1.39395	1.08584	1.38899	0.0018993	1.34864	up
Zjn_sc00022.1.g00810.1.am.mkhc	536	565	578	180	257	80	16.7937	18.9509	16.6591	5.68665	6.85841	2.32683	3.51645e-11	-1.68315	down
Zjn_sc00022.1.g00820.1.am.mkhc	107	139	128	24	44	12	1.26086	1.73124	1.4197	0.264953	0.44932	0.13222	5.69547e-07	-2.21852	down
Zjn_sc00022.1.g00900.1.am.mk	153	95	127	534	498	531	1.66314	1.09103	1.29452	5.51311	4.85281	5.89859	3.97624e-16	2.11151	up
Zjn_sc00022.1.g01030.1.sm.mkhc	203	148	211	79	45	68	2.06819	1.28719	2.2678	0.682044	0.356918	0.619024	1.77577e-05	-1.4831	down
Zjn_sc00022.1.g01070.1.sm.mk	1542	1545	1214	318	305	115	58.5746	62.1412	43.5883	11.5114	10.1112	4.18585	1.21643e-14	-2.52425	down
Zjn_sc00022.1.g01130.1.sm.mk	2546	2389	2065	1088	1226	822	84.9923	84.4335	65.1727	34.6037	35.8108	26.4088	1.07877e-07	-1.12971	down
Zjn_sc00022.1.g01240.1.es.mkhc	5306	4707	6569	15791	12915	15846	74.4699	70.1354	87.2793	207.934	157.229	213.466	2.25501e-10	1.48607	up
Zjn_sc00022.1.g01410.1.sm.mkhc	1445	1362	1328	396	725	442	22.3908	26.6032	22.6298	6.60625	11.3248	7.59817	9.26891e-11	-1.37955	down
Zjn_sc00022.1.g01420.1.am.mkhc	2032	1950	2010	926	938	673	36.3447	36.7707	33.8281	15.8873	14.7059	11.1967	2.80011e-09	-1.20299	down
Zjn_sc00022.1.g01430.1.am.mk	4659	5778	4281	962	1060	786	67.2841	88.3416	58.4494	13.2321	13.3921	10.9295	1.04728e-11	-2.36302	down
Zjn_sc00022.1.g01450.1.am.mk	1172	1507	1112	399	305	320	10.8104	14.7938	9.65442	3.50204	2.47356	2.83842	6.50508e-08	-1.85019	down
Zjn_sc00022.1.g01510.1.sm.mkhc	5813	4928	3569	690	1031	335	187.959	168.702	109.305	21.2723	29.1946	10.3748	5.73656e-09	-2.79361	down
Zjn_sc00022.1.g01590.1.am.mkhc	339	376	236	134	155	137	2.22681	2.61694	1.46202	0.838566	0.890959	0.862891	0.00308501	-1.13282	down
Zjn_sc00022.1.g01850.1.am.mkhc	2343	1682	1802	758	653	727	15.7543	12.7135	11.339	5.10588	4.1619	4.31954	7.10477e-08	-1.39839	down
Zjn_sc00022.1.g01880.1.am.mk	552	610	415	1394	1167	1581	6.8149	7.95476	4.71514	16.0877	12.2578	18.3964	2.8729e-06	1.43387	up
Zjn_sc00022.1.g01920.1.sm.mkhc	615	847	1076	1781	1374	2000	4.05775	6.14813	7.00074	10.6407	8.21045	13.1418	0.00192307	1.08595	up
Zjn_sc00022.1.g01940.1.sm.mk	79	103	155	35	26	26	1.42307	1.96492	2.63935	0.588993	0.400438	0.439456	3.11221e-05	-1.89184	down
Zjn_sc00022.1.g02090.1.am.mkhc	6387	5625	5324	18973	19237	16141	105.607	98.6712	83.2239	299.027	278.434	257.025	3.25615e-20	1.68588	up
Zjn_sc00022.1.g02190.1.sm.mkhc	8278	6681	7133	14056	17393	14228	197.671	168.906	161.023	319.869	363.459	327.158	3.35974e-09	1.08583	up
Zjn_sc00022.1.g02240.1.sm.mkhc	1095	1135	1134	396	473	339	16.6996	18.3433	16.3533	5.75162	6.30447	4.96742	3.37864e-11	-1.44343	down
Zjn_sc00022.1.g02250.1.sm.mk	665	916	969	317	485	177	14.5175	20.7451	19.6611	6.45313	9.10564	3.66282	6.58556e-05	-1.3615	down
Zjn_sc00022.1.g02280.1.sm.mkhc	127	133	111	259	226	276	15.8673	17.582	13.0416	30.7895	24.6275	33.1685	0.000399279	1.08036	up
Zjn_sc00022.1.g02290.1.sm.mkhc	155	167	182	417	370	604	2.13928	2.44275	2.37344	5.49482	4.47201	8.03121	0.000970647	1.52385	up
Zjn_sc00022.1.g02500.1.sm.mkhc	12947	11293	13732	25769	27728	21678	204.164	189.332	205.77	390.05	384.742	335.776	2.25996e-08	1.02817	up
Zjn_sc00022.1.g02510.1.am.mk	1205	1212	1379	3013	3090	2872	14.3288	15.2809	15.529	34.1927	32.2013	32.9361	3.7413e-11	1.28724	up
Zjn_sc00022.1.g02600.1.am.mk	88	136	150	66	58	38	2.95715	4.83256	4.7428	2.08633	1.70067	1.20144	0.00454643	-1.16588	down
Zjn_sc00022.1.g02660.1.sm.mkhc	206	225	218	110	99	94	3.3593	3.87676	3.3535	1.69782	1.40467	1.47626	0.00124019	-1.05622	down
Zjn_sc00022.1.g02690.1.am.mkhc	1076	1028	1111	353	389	276	13.6627	13.8175	13.3451	4.27149	4.32073	3.36982	1.64909e-13	-1.62198	down
Zjn_sc00022.1.g02710.1.am.mkhc	510	476	444	1224	1313	1403	5.86231	5.8277	4.87446	13.4967	13.3151	15.6344	9.21126e-13	1.50434	up
Zjn_sc00022.1.g03030.1.am.mk	157	136	86	557	1014	659	5.56118	6.19449	2.58634	13.1125	25.5883	13.5787	3.73374e-09	2.57048	up
Zjn_sc00022.1.g03110.1.am.mkhc	12424	8692	9945	27429	27629	31191	131.464	92.7992	93.0882	302.821	267.505	322.303	3.08169e-16	1.52235	up
Zjn_sc00022.1.g03360.1.sm.mkhc	229	215	310	979	573	826	2.04698	2.03958	2.63177	8.38618	4.50072	7.14196	0.000125825	1.72452	up
Zjn_sc00022.1.g03420.1.sm.mk	162	133	194	229	398	400	5.92765	5.14858	6.704	7.97815	12.7425	14.1056	0.00359692	1.12091	up
Zjn_sc00022.1.g03980.1.sm.mkhc	3101	2593	2730	1406	1140	1168	56.1012	50.9242	49.6413	25.0319	18.9488	21.244	6.26243e-09	-1.13456	down
Zjn_sc00022.1.g04100.1.sm.mkhc	789	679	887	1725	1674	1879	26.5368	24.1943	28.2138	55.329	49.2875	60.8978	2.73411e-09	1.21869	up
Zjn_sc00022.1.g04110.1.sm.mk	158	136	136	374	414	412	19.3425	17.6801	15.7195	43.8647	44.5087	48.7566	1.44623e-08	1.52261	up
Zjn_sc00022.1.g04280.1.am.mk	2424	2007	1973	708	638	288	43.4414	38.0782	33.4372	12.0931	10.0042	4.95714	3.94481e-14	-1.942	down
Zjn_sc00022.1.g04400.1.am.mk	97	104	137	175	246	263	1.14582	1.30519	1.53758	1.98058	2.56133	3.01784	0.000823686	1.06888	up
Zjn_sc00022.1.g04410.1.sm.mkhc	6741	6776	4502	1547	1880	875	73.9859	78.7375	46.713	16.1807	18.0572	9.23888	1.79102e-06	-2.0533	down
Zjn_sc00022.1.g04420.1.sm.mkhc	54	93	74	31	32	17	2.01711	3.6786	2.59117	1.07323	1.04822	0.589818	0.00714198	-1.44221	down
Zjn_sc00022.1.g04460.1.am.mk	1972	2319	1199	308	360	157	23.4552	29.2	13.4774	3.48254	3.7526	1.79762	2.08087e-05	-2.72835	down
Zjn_sc00022.1.g04480.1.sm.mkhc	421	430	328	184	185	106	5.88291	6.36854	4.32695	2.44668	2.26329	1.41564	2.28725e-05	-1.2878	down
Zjn_sc00022.1.g04550.1.sm.mkhc	576	454	390	262	122	135	10.9913	9.1724	7.02797	4.76398	2.02663	2.47671	0.000435859	-1.40452	down
Zjn_sc00022.1.g04590.1.sm.mkhc	1922	1776	1648	385	552	512	17.933	17.5441	14.5254	3.41483	4.5059	4.59197	4.5251e-19	-1.84751	down
Zjn_sc00022.1.g04600.1.sm.mk	717	841	734	305	330	399	5.97983	7.3898	5.77058	2.44186	2.41707	3.18534	1.58317e-06	-1.1047	down
Zjn_sc00022.1.g04610.1.sm.mk	1666	1731	1628	4088	4209	4328	34.7778	38.0355	31.9685	79.2641	75.8045	84.7719	5.95684e-13	1.37123	up
Zjn_sc00022.1.g04620.1.am.mk	120	160	92	315	442	210	4.40963	6.19924	3.18683	11.0471	14.2078	7.42366	0.00202808	1.38517	up
Zjn_sc00022.1.g04650.1.sm.mk	65	91	39	204	296	142	1.36203	2.16094	0.767216	4.33743	6.14934	3.07882	0.000357015	1.71815	up
Zjn_sc00022.1.g04670.1.sm.mkhc	1683	1708	1601	670	749	567	27.244	29.5786	25.5371	11.9334	11.9958	11.0062	3.48115e-10	-1.29568	down
Zjn_sc00022.1.g04810.1.sm.mk	165	181	144	385	661	302	5.49955	6.41826	4.55306	12.2962	19.3736	9.73973	0.00354121	1.4723	up
Zjn_sc00022.1.g04840.1.sm.mk	42	112	47	2	0	0	0.956958	2.74462	1.02097	0.044401	0	0	0.00011359	-6.60695	down
Zjn_sc00022.1.g04960.1.sm.mk	2130	2507	2784	1059	857	990	19.9172	24.5124	24.6637	9.3147	7.43968	9.09432	3.37903e-11	-1.29987	down
Zjn_sc00022.1.g05090.1.sm.mkhc	1968	1877	1909	5105	4582	4564	33.9666	35.0383	31.3767	86.1167	70.7845	76.3031	9.80236e-13	1.35327	up
Zjn_sc00022.1.g05100.1.sm.mk	56	34	69	184	191	145	2.73217	1.73755	3.16135	8.59764	8.2026	6.85062	1.39482e-06	1.76603	up
Zjn_sc00022.1.g05160.1.am.mk	324	348	359	154	158	127	11.2882	12.869	11.8589	5.1173	4.81651	4.24756	2.25998e-05	-1.19213	down
Zjn_sc00022.1.g05400.1.sm.mkhc	682	599	658	289	341	293	6.16533	6.20265	6.18415	2.82402	2.86909	2.5023	1.59862e-05	-1.03011	down
Zjn_sc00022.1.g05580.1.sm.mk	383	351	283	52	37	12	8.17771	7.95834	5.71254	1.054	0.678845	0.229292	5.36968e-19	-3.3082	down
Zjn_sc00022.1.g05590.1.am.mk	1581	750	1410	341	217	183	34.5648	17.3507	29.1453	7.07392	4.14122	3.83504	2.28729e-05	-2.27642	down
Zjn_sc00022.1.g05620.1.am.mk	2863	1269	2359	634	361	526	51.1641	24.4101	40.5352	10.9704	5.72923	9.19978	0.000379334	-2.02398	down
Zjn_sc00022.1.g05660.1.sm.mkhc	4557	4149	5342	8946	8939	10418	51.3493	49.2	56.9042	96.2084	87.9192	112.835	1.56774e-08	1.06555	up
Zjn_sc00022.1.g05680.1.am.mk	237	191	151	96	56	55	2.47527	2.11488	1.48181	0.956496	0.492398	0.5452	0.000351026	-1.44273	down
Zjn_sc00022.1.g05890.1.am.mkhc	752	471	748	1284	1533	1369	7.37629	4.95531	7.24361	12.4844	13.7424	13.0316	6.07727e-08	1.1377	up
Zjn_sc00022.1.g06100.1.sm.mkhc	4949	3752	2893	1414	1733	1040	104.796	83.7599	57.8378	28.4989	32.1206	21.1363	0.000788556	-1.4476	down
Zjn_sc00022.1.g06120.1.am.mk	560	403	362	145	267	139	9.72667	7.41786	5.94762	2.39742	4.05002	2.32753	0.00198965	-1.24894	down
Zjn_sc00022.1.g06180.1.am.mk	14	26	41	128	95	71	0.511673	0.990106	1.43377	4.52453	3.08166	2.5201	0.000129536	1.91996	up
Zjn_sc00022.1.g06380.1.am.mk	664	534	802	2379	2273	1557	15.8019	13.4632	18.0526	54.0184	47.3932	35.7168	2.15012e-09	1.68239	up
Zjn_sc00022.1.g06400.1.sm.mkhc	181	103	180	32	23	29	4.00431	2.40543	3.77215	0.660973	0.428248	0.615555	8.81738e-09	-2.40015	down
Zjn_sc00022.1.g06530.1.sm.mk	127	42	32	271	427	368	2.44414	0.700574	0.540732	4.93197	7.21439	6.81153	2.23033e-10	2.43354	up
Zjn_sc00022.1.g06550.1.sm.mkhc	1345	1864	928	3213	3064	3755	26.3384	32.3194	14.6281	52.7955	46.5599	61.4051	1.3254e-05	1.30672	up
Zjn_sc00022.1.g06720.1.sm.mkhc	247	211	126	78	75	41	7.54	6.34958	3.17992	1.98536	1.71107	1.13611	0.00434762	-1.57254	down
Zjn_sc00022.1.g06750.1.sm.mk	51	55	50	145	93	100	1.29161	1.49682	1.20025	3.55413	2.0952	2.45942	0.00595396	1.16194	up
Zjn_sc00022.1.g06800.1.sm.mkhc	54	37	39	10	18	6	0.499263	0.404022	0.358186	0.08694	0.145514	0.044824	0.00835036	-1.92268	down
Zjn_sc00022.1.g06910.1.sm.mkhc	1822	2188	1895	868	1003	604	47.3798	60.2385	46.5866	21.6111	22.8176	15.1078	5.33342e-08	-1.22781	down
Zjn_sc00022.1.g07050.1.sm.mkhc	589	536	551	1817	1657	1798	7.51157	7.23705	6.65265	22.1096	18.5134	22.1077	1.10413e-16	1.7001	up
Zjn_sc00022.1.g07170.1.am.mk	195	309	344	41	87	87	2.3687	3.73262	3.85537	0.438295	0.894092	0.944591	4.97073e-06	-1.93679	down
Zjn_sc00022.1.g07300.1.am.mk	149	79	77	194	234	245	2.58597	1.45227	1.25748	3.20578	3.55826	4.09628	0.000206871	1.18187	up
Zjn_sc00022.1.g07530.1.sm.mk	1033	746	831	308	408	258	35.3989	27.0756	26.8817	10.0598	12.3463	8.67724	1.75026e-08	-1.39018	down
Zjn_sc00022.1.g07630.1.sm.mk	127	107	216	31	42	55	3.71804	3.30332	5.97875	0.863791	1.07066	1.52889	0.000438446	-1.74288	down
Zjn_sc00022.1.g07760.1.am.mk	744	591	544	149	145	81	24.7253	20.7581	17.0464	4.71555	4.17733	2.58999	3.27933e-13	-2.2963	down
Zjn_sc00022.1.g07890.1.sm.mkhc	123	113	106	27	31	35	1.7788	1.77926	1.53825	0.369625	0.383865	0.484405	3.14298e-05	-1.83557	down
Zjn_sc00022.1.g08010.1.am.mk	101	138	99	44	35	41	1.50284	2.16167	1.38054	0.613056	0.453878	0.575889	0.000784885	-1.45466	down
Zjn_sc00022.1.g08140.1.am.mk	582	516	651	1416	1470	1438	4.08452	3.92001	4.34319	9.26844	8.83077	9.51158	8.38019e-11	1.35546	up
Zjn_sc00022.1.g08150.1.am.mkhc	2862	3631	3902	1085	2025	1671	56.1919	75.4605	72.4039	20.2851	34.7756	31.581	9.16775e-06	-1.08435	down
Zjn_sc00023.1.g00660.1.am.mk	712	455	524	298	77	258	8.3553	5.8057	6.31498	3.51623	0.856415	3.22984	0.00284275	-1.34248	down
Zjn_sc00023.1.g00740.1.sm.mk	76	78	58	17	38	10	5.20136	5.62033	3.70774	1.11068	2.23056	0.63339	0.00239199	-1.71028	down
Zjn_sc00023.1.g00950.1.am.mk	2512	2435	2721	631	862	679	44.513	45.6379	45.6963	10.6418	13.3985	11.6218	4.03334e-19	-1.78168	down
Zjn_sc00023.1.g01080.1.sm.mk	77	22	42	218	239	279	3.69205	1.09434	1.90229	9.99916	10.0739	12.9246	3.38351e-13	2.44	up
Zjn_sc00023.1.g01200.1.am.mk	3880	3269	3915	1296	2098	1462	51.6877	46.0968	49.2985	16.4541	24.4545	18.743	2.84292e-09	-1.15327	down
Zjn_sc00023.1.g01260.1.sm.mkhc	310	401	371	849	813	978	6.28041	8.611	7.11664	16.4246	14.4414	19.1281	2.55496e-09	1.33336	up
Zjn_sc00023.1.g01370.1.sm.mkhc	724	702	592	196	142	191	5.31622	5.51857	3.98467	1.20314	0.784114	1.30716	1.0073e-14	-1.88405	down
Zjn_sc00023.1.g01400.1.sm.mkhc	403	425	269	98	85	79	10.7645	12.0161	6.78069	2.47618	1.97047	2.01616	3.88569e-06	-2.0358	down
Zjn_sc00023.1.g01430.1.am.mkhc	1636	2224	1954	444	491	285	39.9091	57.4354	45.0686	10.3143	10.4682	6.69532	1.67594e-13	-2.22534	down
Zjn_sc00023.1.g01550.1.am.mkhc	202	206	132	49	63	51	8.23696	8.90868	5.06967	1.87925	2.24754	1.97481	4.79864e-05	-1.7049	down
Zjn_sc00023.1.g01700.1.am.mkhc	629	591	693	297	331	201	20.7192	20.6004	21.5666	9.30595	9.5165	6.3647	1.16793e-06	-1.1701	down
Zjn_sc00023.1.g01720.1.am.mk	416	313	240	122	106	55	9.90587	7.72075	5.36813	2.77283	2.0621	1.26227	0.000264098	-1.75139	down
Zjn_sc00023.1.g01860.1.sm.mkhc	170	107	137	776	774	745	3.5136	2.34877	2.68316	15.333	14.0536	14.8804	3.87523e-25	2.51879	up
Zjn_sc00023.1.g01870.1.sm.mk	4	8	12	51	61	51	0.358037	0.700654	0.981976	4.4085	4.82247	4.48081	2.97849e-05	2.81893	up
Zjn_sc00023.1.g01980.1.am.mk	5813	6832	4120	1879	2187	1829	66.0815	205.027	108.312	52.8619	21.746	20.0078	0.000576473	-1.48464	down
Zjn_sc00023.1.g02290.1.am.mkhc	4068	3884	4178	10507	9732	11710	25.3168	26.8923	25.2618	63.3058	54.2529	71.0368	4.85721e-13	1.44786	up
Zjn_sc00023.1.g02330.1.sm.mkhc	855	522	1059	267	122	167	22.3439	14.4346	26.1585	6.64528	2.78974	4.19804	6.06369e-06	-2.05543	down
Zjn_sc00023.1.g02510.1.sm.mkhc	1907	1750	1539	375	419	306	41.3807	40.204	31.5556	7.75556	7.95421	6.38511	2.06171e-21	-2.20878	down
Zjn_sc00023.1.g02830.1.sm.mkhc	303	289	392	132	135	91	9.14269	9.23264	11.186	3.80246	3.55882	2.62561	8.45817e-07	-1.41418	down
Zjn_sc00023.1.g02870.1.sm.mkhc	674	663	725	1407	1343	1461	6.38624	6.55955	6.5208	12.6615	11.159	13.3878	2.65909e-07	1.07883	up
Zjn_sc00023.1.g02890.1.am.mk	1949	2583	2123	290	298	190	31.5631	44.4354	32.509	4.37494	4.19916	2.88991	3.25763e-19	-3.06859	down
Zjn_sc00023.1.g02910.1.am.mkhc	94	109	98	304	203	237	1.04618	1.2765	1.01599	3.23073	1.97382	2.54214	6.05374e-05	1.35306	up
Zjn_sc00023.1.g02930.1.am.mk	125	202	300	78	73	54	3.291	5.6385	7.50197	1.96435	1.68226	1.35942	0.0050646	-1.55894	down
Zjn_sc00023.1.g02960.1.am.mk	138	203	185	365	388	332	1.91173	2.91234	2.10046	4.69615	4.64801	4.42382	6.76065e-05	1.08196	up
Zjn_sc00023.1.g03020.1.sm.mkhc	1627	1611	1764	3362	3548	3216	14.907	15.6332	15.2816	29.3606	28.454	28.3834	4.26456e-08	1.06111	up
Zjn_sc00023.1.g03040.1.am.mkhc	2291	2520	2719	6438	6530	5182	48.7308	56.7482	54.6621	130.508	121.552	106.124	2.74491e-12	1.31029	up
Zjn_sc00023.1.g03120.1.sm.mkhc	10729	10796	11326	24906	25859	28250	107.464	116.054	109.275	240.743	229.812	275.758	7.59971e-13	1.31307	up
Zjn_sc00023.1.g03640.1.am.mkhc	1490	1029	1313	3854	5138	4401	24.3603	17.8003	20.2762	60.0124	73.5053	69.262	4.85768e-22	1.84816	up
Zjn_sc00023.1.g03870.1.sm.mkhc	240	203	240	65	116	56	6.17458	5.54069	5.85723	1.58672	2.6047	1.37762	5.42856e-06	-1.50265	down
Zjn_sc00023.1.g03920.1.am.mk	1142	1081	725	169	97	52	22.3413	22.6861	13.6371	3.26663	1.68797	0.962253	1.79083e-10	-3.18431	down
Zjn_sc00023.1.g04200.1.am.mk	49	46	24	102	95	84	1.5655	1.5353	0.715296	3.10331	2.64771	2.56659	0.00533071	1.26347	up
Zjn_sc00023.1.g04390.1.am.mkhc	216	209	274	79	129	66	5.4406	5.58384	6.53166	1.88896	2.84428	1.58997	4.62931e-05	-1.32006	down
Zjn_sc00023.1.g04580.1.am.mk	127	80	128	525	468	375	5.44957	3.61972	5.20223	21.5846	17.6592	15.5836	8.96884e-15	2.08196	up
Zjn_sc00023.1.g04620.1.am.mk	76	41	70	157	147	129	2.22216	1.26632	1.92511	4.39705	3.76987	3.65625	0.00097471	1.26543	up
Zjn_sc00023.1.g04810.1.sm.mkhc	223	328	293	121	113	119	1.42074	2.09295	1.68452	0.696291	0.585137	0.716399	4.84488e-05	-1.21486	down
Zjn_sc00023.1.g04840.1.sm.mkhc	90545	75010	83863	236800	254830	229741	2065.43	1786	1815.71	5126.13	5109.36	4978.05	3.57666e-18	1.57533	up
Zjn_sc00023.1.g04930.1.sm.mk	18	17	9	166	158	162	1.8278	1.76671	0.797836	16.026	14.0199	15.8462	3.17143e-16	3.49262	up
Zjn_sc00023.1.g05180.1.am.mk	840	927	906	330	259	143	30.233	35.3211	30.823	11.2946	8.14355	4.94487	1.18903e-15	-1.8338	down
Zjn_sc00023.1.g05320.1.am.mk	119	159	122	63	72	41	3.17122	4.50322	3.08459	1.59235	1.67016	1.0429	0.00407574	-1.16233	down
Zjn_sc00023.1.g05340.1.am.mk	1553	1689	1268	464	507	312	23.1395	26.5244	18.1663	6.71498	6.73985	4.55808	4.61526e-09	-1.79012	down
Zjn_sc00023.1.g05810.1.sm.mkhc	864	645	918	1961	1808	1844	15.1942	11.8076	15.1314	32.4999	27.6273	30.8493	5.27664e-10	1.2641	up
Zjn_sc00023.1.g05920.1.sm.mkhc	9278	6726	8184	3000	1319	1472	310.878	234.517	262.561	98.1782	39.5273	47.1785	1.0634e-12	-2.00441	down
Zjn_sc00023.1.g05960.1.sm.mkhc	149	133	124	55	68	32	6.22813	5.88586	4.8789	2.17747	2.46624	1.25578	0.000713405	-1.36679	down
Zjn_sc00023.1.g05970.1.am.mkhc	9841	9572	8889	4365	4952	3101	253.405	299.635	250.499	118.85	126.138	80.5789	7.51387e-10	-1.15904	down
Zjn_sc00023.1.g05980.1.sm.mkhc	1748	1824	2250	911	829	760	34.528	38.0352	42.2238	17.2082	14.5099	14.4066	5.73314e-09	-1.16998	down
Zjn_sc00023.1.g06010.1.sm.mk	396	412	332	133	116	121	17.8145	19.6454	14.1355	5.70242	4.55769	5.20837	1.04233e-08	-1.58416	down
Zjn_sc00023.1.g06160.1.am.mkhc	293	448	267	144	56	44	6.41949	11.7899	5.15367	3.58058	1.10598	0.778168	0.00115494	-2.01182	down
Zjn_sc00023.1.g06660.1.am.mk	25	60	73	123	111	98	0.381318	0.989922	1.07864	1.83696	1.5263	1.48664	0.00878504	1.12318	up
Zjn_sc00023.1.g06690.1.am.mk	49	62	50	376	347	541	1.11945	1.49374	1.07841	8.24458	6.97966	11.9922	1.03796e-08	3.02149	up
Zjn_sc00023.1.g06920.1.am.mk	2704	2415	3273	830	368	851	58.7742	55.582	67.2504	17.1946	6.9919	17.7996	6.46581e-21	-1.95871	down
Zjn_sc00023.1.g06970.1.sm.mkhc	417	397	449	191	191	227	8.39921	8.46239	8.53306	3.65362	3.35761	4.38732	0.000132899	-1.00093	down
Zjn_sc00023.1.g07270.1.sm.mkhc	1023	1001	1079	439	613	413	18.9806	19.4686	18.735	7.75743	9.9792	7.33597	2.02395e-06	-1.04975	down
Zjn_sc00024.1.g00270.1.am.mkhc	126	89	50	157	227	207	2.97492	2.23373	1.11566	3.54412	4.70479	4.70971	0.000395359	1.17979	up
Zjn_sc00024.1.g00540.1.sm.mk	938	733	696	122	446	223	32.9049	27.2065	23.0774	4.06895	13.6916	7.53033	5.25031e-05	-1.57142	down
Zjn_sc00024.1.g00560.1.am.mk	2273	2098	2587	675	1312	769	45.2984	44.8658	47.9661	12.653	22.3475	14.3401	7.77395e-11	-1.30639	down
Zjn_sc00024.1.g00590.1.sm.mk	4417	4363	2909	1896	1771	1082	70.8885	74.1967	44.1795	29.0195	24.8645	16.7012	0.00131429	-1.2771	down
Zjn_sc00024.1.g00910.1.am.mkhc	16781	14118	15582	33246	32556	32355	300.625	261.872	266.302	563.415	512.675	574.851	8.79156e-10	1.12445	up
Zjn_sc00024.1.g01480.1.am.mk	613	616	536	1360	1146	1581	4.36653	4.64888	3.60927	9.23689	7.15194	10.8541	1.83427e-05	1.2595	up
Zjn_sc00024.1.g01550.1.sm.mkhc	1178	1193	1139	436	435	383	11.2001	12.2011	10.0708	3.96255	3.30146	3.55178	2.00462e-11	-1.44567	down
Zjn_sc00024.1.g01780.1.sm.mk	62	70	81	9	17	27	0.943698	1.082	1.04744	0.139562	0.204894	0.313759	0.000427843	-1.94899	down
Zjn_sc00024.1.g02050.1.am.mk	1798	1432	1894	4153	4801	4129	16.1801	13.2715	15.8458	35.9517	38.1796	35.8125	2.17594e-13	1.39877	up
Zjn_sc00024.1.g02140.1.sm.mkhc	545	392	295	1085	1724	1004	16.2002	12.3382	8.28169	30.7351	44.8377	28.7425	1.11069e-05	1.64687	up
Zjn_sc00024.1.g02230.1.am.mkhc	460	494	424	129	89	66	9.18528	10.2481	7.64067	2.50253	1.52197	0.861527	2.01132e-16	-2.24137	down
Zjn_sc00024.1.g02440.1.am.mk	339	268	331	653	603	725	6.54061	5.51642	6.09533	12.082	10.1853	13.4994	1.8771e-06	1.13269	up
Zjn_sc00024.1.g02490.1.sm.mkhc	3537	3385	3237	1162	1801	1012	147.533	149.52	127.641	46.1723	65.7483	40.6288	1.20564e-11	-1.3301	down
Zjn_sc00024.1.g02830.1.sm.mkhc	534	518	423	216	219	196	10.2785	10.5492	7.68846	3.94527	3.68214	3.63026	3.23631e-06	-1.19032	down
Zjn_sc00024.1.g02880.1.sm.mk	613	1001	547	126	268	153	12.7607	22.0674	10.7662	2.48807	4.87783	3.0488	0.00268603	-1.97845	down
Zjn_sc00024.1.g02890.1.am.mk	87	178	185	43	55	26	1.24435	2.74746	2.38751	0.544876	0.681935	0.352334	0.00156982	-1.83157	down
Zjn_sc00025.1.g00700.1.am.mkhc	151	86	139	294	271	284	4.7835	2.88318	4.16581	8.91249	7.54926	8.68923	3.66343e-05	1.23201	up
Zjn_sc00025.1.g00720.1.sm.mkhc	146	137	209	67	82	57	4.7974	4.75507	6.49841	2.09767	2.34253	1.78904	0.00092903	-1.20924	down
Zjn_sc00025.1.g01250.1.sm.mkhc	2115	2442	2141	818	852	646	38.0989	48.0967	37.7882	14.3569	13.9193	10.7081	8.81526e-14	-1.49891	down
Zjn_sc00025.1.g01280.1.sm.mkhc	132696	131589	132033	56916	55599	50817	1001.58	1050.62	945.688	406.76	366.258	366.989	1.05555e-11	-1.23704	down
Zjn_sc00025.1.g01370.1.sm.mkhc	2638	1913	2153	4937	4424	5575	17.468	13.3226	13.2473	30.7545	25.4706	35.3017	5.65731e-07	1.20783	up
Zjn_sc00025.1.g01380.1.am.mkhc	5901	5909	5437	1811	1974	1423	104.026	112.048	90.4841	30.6312	30.7681	23.7572	5.2071e-19	-1.69484	down
Zjn_sc00025.1.g01560.1.am.mk	2913	2769	2257	702	806	578	25.1337	25.3192	18.4419	5.80793	6.19922	4.80889	8.63031e-13	-1.89997	down
Zjn_sc00025.1.g01810.1.am.mkhc	252	212	285	65	129	60	5.64535	4.98488	5.9711	1.36119	2.52167	1.28126	1.65846e-06	-1.53401	down
Zjn_sc00025.1.g02000.1.sm.mk	6099	6596	3904	328	198	143	94.1714	107.687	56.9511	4.83569	2.68934	2.18535	1.34265e-13	-4.60473	down
Zjn_sc00025.1.g02010.1.sm.mkhc	8146	8029	6723	2207	2282	1540	111.734	116.367	87.0808	28.424	27.0107	20.1717	1.59294e-15	-1.89607	down
Zjn_sc00025.1.g02270.1.am.mk	45	68	83	134	192	130	0.714764	1.14447	1.26025	2.04816	2.6962	2.00644	0.000713282	1.25716	up
Zjn_sc00025.1.g02310.1.sm.mkhc	4458	4123	3698	9963	10238	12260	67.0881	60.9249	50.183	139.435	132.69	173.892	1.84027e-10	1.44662	up
Zjn_sc00025.1.g02490.1.sm.mkhc	486	439	492	1394	1264	1337	9.08542	8.78936	8.81947	23.9409	20.3323	22.1251	2.73074e-13	1.54428	up
Zjn_sc00025.1.g02660.1.sm.mkhc	1596	1825	1967	4723	5012	5038	16.6116	20.1873	19.4312	47.0457	45.8275	50.6368	2.46453e-15	1.50121	up
Zjn_sc00025.1.g02710.1.am.mkhc	86	139	98	35	49	18	3.13712	5.35372	3.37371	1.21084	1.55455	0.624205	0.00121296	-1.6549	down
Zjn_sc00025.1.g02840.1.sm.mk	54	55	44	97	152	108	3.22468	3.50935	2.51696	5.57367	8.01976	6.28516	0.00221421	1.24632	up
Zjn_sc00025.1.g03090.1.sm.mkhc	215	151	175	380	427	405	4.20451	3.38927	3.04664	7.15269	7.30812	6.87375	5.35058e-06	1.20789	up
Zjn_sc00025.1.g03350.1.am.mk	569	547	497	273	258	248	3.99772	4.0685	3.30043	1.82703	1.58474	1.67956	4.94117e-05	-1.00993	down
Zjn_sc00025.1.g03370.1.am.mk	381	431	231	98	51	45	4.56409	5.46819	2.61584	1.11806	0.532184	0.51484	6.7183e-05	-2.39609	down
Zjn_sc00025.1.g03490.1.am.mk	182	120	154	381	360	422	1.81829	1.27395	1.45679	3.64148	3.15999	4.08099	2.37906e-07	1.40418	up
[truncated: 2,039 more rows]

## Sheet: Vlookup
#ID				regulated	FDR
PB.10049	#N/A	#N/A	#N/A	down	3.92364e-05
PB.10233	#N/A	#N/A	#N/A	up	0.00334355
PB.10274	#N/A	#N/A	#N/A	up	8.35123e-10
PB.10594	#N/A	#N/A	#N/A	down	0.000181464
PB.10828	#N/A	#N/A	#N/A	down	0.000681512
PB.10873	#N/A	#N/A	#N/A	down	2.83353e-09
PB.10906	#N/A	#N/A	#N/A	up	5.77865e-11
PB.11069	#N/A	#N/A	#N/A	down	4.79135e-15
PB.11191	#N/A	#N/A	#N/A	up	0.000905143
PB.11333	#N/A	#N/A	#N/A	down	1.35228e-08
PB.11366	#N/A	#N/A	#N/A	down	4.97426e-07
PB.11450	#N/A	#N/A	#N/A	up	0.000361832
PB.11528	#N/A	#N/A	#N/A	up	1.85792e-08
PB.11570	#N/A	#N/A	#N/A	down	2.77876e-07
PB.11620	#N/A	#N/A	#N/A	up	0.00346466
PB.11849	#N/A	#N/A	#N/A	up	4.87899e-09
PB.12067	#N/A	#N/A	#N/A	up	1.62022e-06
PB.12134	#N/A	#N/A	#N/A	up	6.35434e-08
PB.12495	#N/A	#N/A	#N/A	down	0.00357783
PB.1266	#N/A	#N/A	#N/A	down	4.98341e-09
PB.12784	#N/A	#N/A	#N/A	down	2.18487e-06
PB.12906	#N/A	#N/A	#N/A	up	4.80061e-05
PB.13101	#N/A	#N/A	#N/A	down	3.32052e-07
PB.13122	#N/A	#N/A	#N/A	up	2.63749e-08
PB.13123	#N/A	#N/A	#N/A	up	9.60468e-29
PB.13152	#N/A	#N/A	#N/A	up	6.97894e-28
PB.13176	#N/A	#N/A	#N/A	up	0.000199336
PB.13210	#N/A	#N/A	#N/A	down	0.000418668
PB.1328	#N/A	#N/A	#N/A	down	1.11528e-12
PB.13338	#N/A	#N/A	#N/A	down	9.50326e-18
PB.13554	#N/A	#N/A	#N/A	up	1.26068e-07
PB.13644	#N/A	#N/A	#N/A	up	1.77278e-08
PB.13657	#N/A	#N/A	#N/A	down	2.04311e-12
PB.13678	#N/A	#N/A	#N/A	down	1.16062e-08
PB.13691	#N/A	#N/A	#N/A	up	1.69256e-08
PB.13929	#N/A	#N/A	#N/A	up	0.00276065
PB.13942	#N/A	#N/A	#N/A	down	5.96786e-05
PB.14245	#N/A	#N/A	#N/A	up	1.25327e-06
PB.14268	#N/A	#N/A	#N/A	up	0.00804437
PB.1432	#N/A	#N/A	#N/A	up	2.63085e-05
PB.14523	#N/A	#N/A	#N/A	up	0.00186713
PB.14549	#N/A	#N/A	#N/A	down	4.37493e-06
PB.14666	#N/A	#N/A	#N/A	up	0.00247854
PB.14808	#N/A	#N/A	#N/A	down	6.37465e-13
PB.14827	#N/A	#N/A	#N/A	up	0.00417368
PB.14892	#N/A	#N/A	#N/A	up	6.71901e-05
PB.15065	#N/A	#N/A	#N/A	down	8.87035e-05
PB.15186	#N/A	#N/A	#N/A	up	4.60323e-09
PB.15263	#N/A	#N/A	#N/A	up	3.75066e-05
PB.15265	#N/A	#N/A	#N/A	down	3.39881e-05
PB.15352	#N/A	#N/A	#N/A	down	1.30001e-07
PB.15429	#N/A	#N/A	#N/A	up	1.21108e-05
PB.15695	#N/A	#N/A	#N/A	up	0.000103109
PB.15823	#N/A	#N/A	#N/A	down	0.00940282
PB.15896	#N/A	#N/A	#N/A	up	0.00602026
PB.15935	#N/A	#N/A	#N/A	up	0.00052019
PB.16298	#N/A	#N/A	#N/A	down	4.56352e-08
PB.16305	#N/A	#N/A	#N/A	down	2.09621e-07
PB.16313	#N/A	#N/A	#N/A	down	3.72806e-05
PB.1776	#N/A	#N/A	#N/A	up	7.16124e-05
PB.1849	#N/A	#N/A	#N/A	down	3.19106e-06
PB.2042	#N/A	#N/A	#N/A	up	2.34643e-11
PB.2104	#N/A	#N/A	#N/A	up	6.66903e-06
PB.2145	#N/A	#N/A	#N/A	up	7.07534e-05
PB.2216	#N/A	#N/A	#N/A	down	7.81078e-06
PB.2242	#N/A	#N/A	#N/A	up	3.34594e-14
PB.2373	#N/A	#N/A	#N/A	down	0.000885332
PB.2415	#N/A	#N/A	#N/A	down	6.59616e-06
PB.2478	#N/A	#N/A	#N/A	down	0.000148221
PB.2484	#N/A	#N/A	#N/A	up	0.000345065
PB.2515	#N/A	#N/A	#N/A	up	0.00148895
PB.2528	#N/A	#N/A	#N/A	down	4.12568e-05
PB.2600	#N/A	#N/A	#N/A	down	0.00124736
PB.2670	#N/A	#N/A	#N/A	up	5.11764e-05
PB.2760	#N/A	#N/A	#N/A	down	0.000419625
PB.2796	#N/A	#N/A	#N/A	up	2.01855e-33
PB.2797	#N/A	#N/A	#N/A	up	4.60536e-13
PB.2800	#N/A	#N/A	#N/A	up	1.59125e-11
PB.2931	#N/A	#N/A	#N/A	up	0.00142283
PB.2934	#N/A	#N/A	#N/A	up	0.00599059
PB.2951	#N/A	#N/A	#N/A	down	2.96459e-06
PB.3062	PB.3062.1	RLK-Pelle_WAK	PK	down	6.20451e-10
PB.3078	#N/A	#N/A	#N/A	down	0.00428868
PB.3195	#N/A	#N/A	#N/A	up	2.12102e-10
PB.3469	#N/A	#N/A	#N/A	down	0.00469482
PB.35	#N/A	#N/A	#N/A	down	0.000260416
PB.3517	#N/A	#N/A	#N/A	down	2.02919e-44
PB.3612	#N/A	#N/A	#N/A	up	1.93735e-06
PB.3614	#N/A	#N/A	#N/A	up	2.79274e-07
PB.3616	#N/A	#N/A	#N/A	up	1.63526e-05
PB.3977	#N/A	#N/A	#N/A	up	6.16671e-07
PB.4036	#N/A	#N/A	#N/A	down	0.00183763
PB.4216	#N/A	#N/A	#N/A	up	9.64153e-10
PB.4217	#N/A	#N/A	#N/A	down	0.00615665
PB.4230	#N/A	#N/A	#N/A	down	3.01689e-11
PB.4233	#N/A	#N/A	#N/A	down	2.78791e-06
PB.4546	#N/A	#N/A	#N/A	up	1.42567e-21
PB.4594	#N/A	#N/A	#N/A	up	1.21376e-05
PB.4706	#N/A	#N/A	#N/A	up	1.6064e-12
PB.4951	#N/A	#N/A	#N/A	up	6.90627e-08
PB.5020	#N/A	#N/A	#N/A	down	0.00386195
PB.5179	#N/A	#N/A	#N/A	up	9.17929e-10
PB.5196	#N/A	#N/A	#N/A	down	1.77991e-06
PB.5197	#N/A	#N/A	#N/A	up	2.73087e-09
PB.533	#N/A	#N/A	#N/A	down	4.8843e-07
PB.5675	#N/A	#N/A	#N/A	up	2.15069e-07
PB.5830	#N/A	#N/A	#N/A	up	1.01372e-17
PB.5901	#N/A	#N/A	#N/A	down	0.00317031
PB.6034	#N/A	#N/A	#N/A	up	6.37943e-20
PB.6191	#N/A	#N/A	#N/A	down	0.000205854
PB.6480	#N/A	#N/A	#N/A	up	3.8753e-13
PB.6618	#N/A	#N/A	#N/A	up	2.78738e-06
PB.6698	#N/A	#N/A	#N/A	up	3.78407e-06
PB.6854	#N/A	#N/A	#N/A	down	1.05571e-10
PB.6912	#N/A	#N/A	#N/A	down	2.43491e-05
PB.6979	#N/A	#N/A	#N/A	down	0.00532177
PB.7101	#N/A	#N/A	#N/A	down	0.00236742
PB.7191	#N/A	#N/A	#N/A	up	1.82644e-11
PB.7205	#N/A	#N/A	#N/A	up	3.21904e-05
PB.7417	#N/A	#N/A	#N/A	down	7.62037e-07
PB.7608	#N/A	#N/A	#N/A	up	2.75671e-18
PB.7688	#N/A	#N/A	#N/A	up	0.000901335
PB.8012	#N/A	#N/A	#N/A	down	1.17724e-13
PB.8164	#N/A	#N/A	#N/A	down	0.000290458
PB.8312	#N/A	#N/A	#N/A	down	1.38095e-06
PB.8341	#N/A	#N/A	#N/A	up	2.10081e-09
PB.845	PB.845.1	RLK-Pelle_RLCK-VIIa-2	PK	up	7.24814e-10
PB.8564	#N/A	#N/A	#N/A	down	0.00223017
PB.8588	#N/A	#N/A	#N/A	up	0.0014867
PB.8592	#N/A	#N/A	#N/A	up	1.17825e-19
PB.8611	#N/A	#N/A	#N/A	down	0.000117082
PB.8653	#N/A	#N/A	#N/A	down	1.55485e-25
PB.8658	#N/A	#N/A	#N/A	up	1.94828e-05
PB.9045	#N/A	#N/A	#N/A	up	9.86759e-07
PB.9343	#N/A	#N/A	#N/A	up	0.000133086
PB.9720	#N/A	#N/A	#N/A	down	3.00807e-08
PB.9763	#N/A	#N/A	#N/A	down	0.00408365
PB.987	#N/A	#N/A	#N/A	down	8.13678e-08
PB.9923	#N/A	#N/A	#N/A	down	5.8587e-07
PB.9985	#N/A	#N/A	#N/A	down	2.1141e-08
Zjn_sc00001.1.g00190.1.sm.mkhc	#N/A	#N/A	#N/A	up	2.47384e-05
Zjn_sc00001.1.g00230.1.am.mk	Zjn_sc00001.1.g00230.1.am.mk.mRNA	SNF2	TR	up	0.00847483
Zjn_sc00001.1.g00250.1.am.mk	#N/A	#N/A	#N/A	up	4.34227e-08
Zjn_sc00001.1.g00420.1.am.mkhc	#N/A	#N/A	#N/A	up	0.00111787
Zjn_sc00001.1.g00810.1.sm.mkhc	#N/A	#N/A	#N/A	down	1.1178e-11
Zjn_sc00001.1.g00880.1.sm.mkhc	PB.44.1	B3	TF	down	1.6969e-07
Zjn_sc00001.1.g01080.1.am.mk	#N/A	#N/A	#N/A	down	4.10969e-06
Zjn_sc00001.1.g01175.1.br	#N/A	#N/A	#N/A	down	1.22924e-05
Zjn_sc00001.1.g01200.1.sm.mk	#N/A	#N/A	#N/A	up	0.00153397
Zjn_sc00001.1.g01220.1.sm.mkhc	#N/A	#N/A	#N/A	down	1.46747e-08
Zjn_sc00001.1.g01230.1.sm.mk	#N/A	#N/A	#N/A	up	0.00140113
Zjn_sc00001.1.g01280.1.sm.mk	#N/A	#N/A	#N/A	down	3.13521e-53
Zjn_sc00001.1.g01550.1.sm.mkhc	#N/A	#N/A	#N/A	down	2.58996e-09
Zjn_sc00001.1.g01590.1.sm.mkhc	#N/A	#N/A	#N/A	down	5.57642e-05
Zjn_sc00001.1.g01830.1.sm.mkhc	#N/A	#N/A	#N/A	down	1.43343e-08
Zjn_sc00001.1.g01870.1.am.mk	#N/A	#N/A	#N/A	down	7.18055e-11
Zjn_sc00001.1.g01960.1.am.mkhc	#N/A	#N/A	#N/A	down	0.000237421
Zjn_sc00001.1.g01970.1.sm.mkhc	#N/A	#N/A	#N/A	down	1.8858e-12
Zjn_sc00001.1.g01990.1.sm.mkhc	#N/A	#N/A	#N/A	down	6.28328e-07
Zjn_sc00001.1.g02060.1.am.mk	#N/A	#N/A	#N/A	down	1.68086e-06
Zjn_sc00001.1.g02100.1.am.mkhc	#N/A	#N/A	#N/A	down	0.00750452
Zjn_sc00001.1.g02370.1.am.mk	#N/A	#N/A	#N/A	down	0.00702561
Zjn_sc00001.1.g02540.1.am.mk	#N/A	#N/A	#N/A	up	5.97953e-18
Zjn_sc00001.1.g02920.1.sm.mkhc	#N/A	#N/A	#N/A	down	7.95975e-26
Zjn_sc00001.1.g02930.1.sm.mk	#N/A	#N/A	#N/A	down	7.08458e-10
Zjn_sc00001.1.g03010.1.sm.mk	#N/A	#N/A	#N/A	down	7.12178e-06
Zjn_sc00001.1.g03180.1.sm.mkhc	#N/A	#N/A	#N/A	up	1.47933e-07
Zjn_sc00001.1.g03310.1.sm.mkhc	#N/A	#N/A	#N/A	up	1.32399e-07
Zjn_sc00001.1.g03540.1.sm.mk	PB.139.2	RLK-Pelle_LRR-V	PK	down	0.00516973
Zjn_sc00001.1.g03760.1.sm.mkhc	PB.145.3	Others	TR	up	1.79436e-08
Zjn_sc00001.1.g03830.1.sm.mkhc	#N/A	#N/A	#N/A	down	2.06659e-15
Zjn_sc00001.1.g04040.1.sm.mkhc	#N/A	#N/A	#N/A	down	2.67761e-09
Zjn_sc00001.1.g04110.1.am.mk	#N/A	#N/A	#N/A	down	4.57091e-05
Zjn_sc00001.1.g04140.1.am.mk	Zjn_sc00001.1.g04140.1.am.mk.mRNA	NF-YB	TF	down	2.84232e-09
Zjn_sc00001.1.g04290.1.sm.mkhc	#N/A	#N/A	#N/A	up	2.68077e-06
Zjn_sc00001.1.g04300.1.sm.mkhc	#N/A	#N/A	#N/A	up	2.00691e-10
Zjn_sc00001.1.g04510.1.sm.mkhc	#N/A	#N/A	#N/A	down	3.3883e-09
Zjn_sc00001.1.g04920.1.sm.mkhc	#N/A	#N/A	#N/A	up	4.19301e-09
Zjn_sc00001.1.g04960.1.sm.mkhc	#N/A	#N/A	#N/A	up	2.71047e-06
Zjn_sc00001.1.g05070.1.am.mk	Zjn_sc00001.1.g05070.1.am.mk.mRNA	C2H2	TF	down	0.00742666
Zjn_sc00001.1.g05420.1.am.mk	#N/A	#N/A	#N/A	up	1.61536e-09
Zjn_sc00001.1.g05510.1.am.mkhc	#N/A	#N/A	#N/A	up	6.7414e-18
Zjn_sc00001.1.g05940.1.sm.mkhc	#N/A	#N/A	#N/A	down	4.52105e-08
Zjn_sc00001.1.g06260.1.sm.mkhc	#N/A	#N/A	#N/A	down	1.9387e-09
Zjn_sc00001.1.g06280.1.am.mk	#N/A	#N/A	#N/A	down	0.00271201
Zjn_sc00001.1.g06300.1.sm.mkhc	#N/A	#N/A	#N/A	down	3.02257e-19
Zjn_sc00001.1.g06320.1.am.mk	#N/A	#N/A	#N/A	down	0.000117658
Zjn_sc00001.1.g06450.1.am.mk	Zjn_sc00001.1.g06450.1.am.mk.mRNA	GRAS	TF	down	1.39834e-16
Zjn_sc00001.1.g06590.1.sm.mk	#N/A	#N/A	#N/A	down	0.00169794
Zjn_sc00001.1.g06730.1.sm.mk	#N/A	#N/A	#N/A	up	4.35363e-15
Zjn_sc00001.1.g06810.1.sm.mkhc	#N/A	#N/A	#N/A	down	1.43347e-20
Zjn_sc00001.1.g06850.1.am.mk	#N/A	#N/A	#N/A	down	4.754e-06
Zjn_sc00001.1.g06980.1.sm.mk	#N/A	#N/A	#N/A	down	0.000108475
Zjn_sc00001.1.g07100.1.sm.mkhc	#N/A	#N/A	#N/A	up	1.63214e-06
Zjn_sc00001.1.g07370.1.am.mk	PB.250.2	RLK-Pelle_DLSV	PK	up	0.000425139
Zjn_sc00001.1.g07470.1.sm.mkhc	#N/A	#N/A	#N/A	down	7.45477e-09
Zjn_sc00001.1.g07530.1.sm.mk	#N/A	#N/A	#N/A	down	1.95001e-09
Zjn_sc00001.1.g07640.1.am.mk	#N/A	#N/A	#N/A	up	1.8373e-07
Zjn_sc00001.1.g07660.1.am.mkhc	#N/A	#N/A	#N/A	down	1.36629e-06
Zjn_sc00001.1.g07670.1.sm.mkhc	#N/A	#N/A	#N/A	down	9.76025e-08
Zjn_sc00001.1.g07720.1.am.mk	#N/A	#N/A	#N/A	down	6.22608e-07
Zjn_sc00001.1.g07840.1.sm.mkhc	PB.277.1	RLK-Pelle_DLSV	PK	up	2.42243e-19
Zjn_sc00001.1.g07930.1.sm.mk	#N/A	#N/A	#N/A	up	0.000122026
Zjn_sc00001.1.g08070.1.sm.mkhc	#N/A	#N/A	#N/A	down	7.25068e-08
Zjn_sc00001.1.g08150.1.am.mk	#N/A	#N/A	#N/A	up	3.90475e-09
Zjn_sc00001.1.g08410.1.am.mk	#N/A	#N/A	#N/A	down	2.57315e-21
Zjn_sc00001.1.g08470.1.sm.mk	Zjn_sc00001.1.g08470.1.sm.mk.mRNA	NAC	TF	up	0.000475332
Zjn_sc00001.1.g08530.1.am.mk	#N/A	#N/A	#N/A	up	6.12347e-19
Zjn_sc00001.1.g08870.1.sm.mkhc	#N/A	#N/A	#N/A	down	1.7154e-06
Zjn_sc00001.1.g09170.1.am.mk	Zjn_sc00001.1.g09170.1.am.mk.mRNA	SBP	TF	down	7.41964e-05
Zjn_sc00001.1.g09580.1.sm.mkhc	#N/A	#N/A	#N/A	down	2.15789e-09
Zjn_sc00001.1.g09740.1.sm.mkhc	#N/A	#N/A	#N/A	down	0.0093734
Zjn_sc00001.1.g10050.1.am.mk	#N/A	#N/A	#N/A	down	3.21904e-05
Zjn_sc00001.1.g10120.1.am.mk	#N/A	#N/A	#N/A	down	0.00667697
Zjn_sc00001.1.g10260.1.am.mk	#N/A	#N/A	#N/A	down	7.24416e-23
Zjn_sc00001.1.g10320.1.sm.mkhc	#N/A	#N/A	#N/A	down	1.62482e-07
Zjn_sc00001.1.g10360.1.am.mk	#N/A	#N/A	#N/A	down	2.10806e-12
Zjn_sc00001.1.g10660.1.am.mkhc	#N/A	#N/A	#N/A	up	0.00873488
Zjn_sc00001.1.g10900.1.sm.mkhc	#N/A	#N/A	#N/A	up	1.08158e-09
Zjn_sc00001.1.g11150.1.sm.mkhc	#N/A	#N/A	#N/A	up	1.07692e-08
Zjn_sc00001.1.g11730.1.am.mk	#N/A	#N/A	#N/A	down	3.53883e-08
Zjn_sc00001.1.g11760.1.sm.mkhc	#N/A	#N/A	#N/A	down	2.3873e-15
Zjn_sc00001.1.g12030.1.sm.mkhc	#N/A	#N/A	#N/A	down	2.41521e-06
Zjn_sc00001.1.g12350.1.am.mk	#N/A	#N/A	#N/A	down	5.5382e-08
Zjn_sc00001.1.g12360.1.sm.mkhc	#N/A	#N/A	#N/A	down	1.74483e-18
Zjn_sc00001.1.g12470.1.am.mk	#N/A	#N/A	#N/A	up	0.00242728
Zjn_sc00001.1.g12480.1.am.mk	#N/A	#N/A	#N/A	up	5.80936e-09
Zjn_sc00001.1.g13110.1.am.mk	#N/A	#N/A	#N/A	up	1.09792e-12
Zjn_sc00002.1.g00280.1.sm.mkhc	#N/A	#N/A	#N/A	up	1.79554e-19
Zjn_sc00002.1.g00430.1.am.mk	#N/A	#N/A	#N/A	up	1.19883e-05
Zjn_sc00002.1.g00470.1.sm.mkhc	#N/A	#N/A	#N/A	up	1.34538e-17
Zjn_sc00002.1.g00600.1.sm.mk	#N/A	#N/A	#N/A	down	0.000286993
Zjn_sc00002.1.g00710.1.sm.mk	PB.435.1	RLK-Pelle_RLCK-VIIa-2	PK	down	2.16594e-11
Zjn_sc00002.1.g00760.1.sm.mk	#N/A	#N/A	#N/A	down	2.14404e-19
Zjn_sc00002.1.g01200.1.sm.mkhc	#N/A	#N/A	#N/A	down	5.70925e-16
Zjn_sc00002.1.g01360.1.sm.mkhc	#N/A	#N/A	#N/A	down	8.00795e-06
Zjn_sc00002.1.g01410.1.am.mkhc	#N/A	#N/A	#N/A	up	5.6198e-07
Zjn_sc00002.1.g01520.1.am.mkhc	#N/A	#N/A	#N/A	up	3.71251e-21
Zjn_sc00002.1.g01600.1.am.mk	#N/A	#N/A	#N/A	up	5.93015e-11
Zjn_sc00002.1.g01690.1.sm.mkhc	#N/A	#N/A	#N/A	down	1.4593e-08
Zjn_sc00002.1.g01740.1.am.mk	#N/A	#N/A	#N/A	down	0.00852357
Zjn_sc00002.1.g02150.1.am.mkhc	#N/A	#N/A	#N/A	down	6.98232e-06
Zjn_sc00002.1.g02530.1.sm.mk	#N/A	#N/A	#N/A	up	3.1014e-10
Zjn_sc00002.1.g02830.1.am.mk	PB.491.1	NAC	TF	up	1.20647e-11
Zjn_sc00002.1.g02870.1.sm.mkhc	PB.493.1	NAC	TF	up	4.58805e-16
Zjn_sc00002.1.g02930.1.sm.mkhc	#N/A	#N/A	#N/A	up	1.44262e-08
Zjn_sc00002.1.g03040.1.cf.mkhc	#N/A	#N/A	#N/A	up	2.31832e-05
Zjn_sc00002.1.g03130.1.am.mk	#N/A	#N/A	#N/A	down	0.00401021
Zjn_sc00002.1.g03510.1.sm.mkhc	#N/A	#N/A	#N/A	down	1.53629e-13
Zjn_sc00002.1.g03630.1.sm.mkhc	#N/A	#N/A	#N/A	up	0.000195024
Zjn_sc00002.1.g03810.1.sm.mk	#N/A	#N/A	#N/A	up	4.02333e-05
Zjn_sc00002.1.g03920.1.sm.mk	#N/A	#N/A	#N/A	up	0.000306756
Zjn_sc00002.1.g04040.1.am.mk	Zjn_sc00002.1.g04040.1.am.mk.mRNA	bZIP	TF	down	4.01893e-08
Zjn_sc00002.1.g04090.1.sm.mkhc	#N/A	#N/A	#N/A	up	6.31541e-08
Zjn_sc00002.1.g04330.1.am.mkhc	PB.545.1	PHD	TR	up	5.47277e-15
Zjn_sc00002.1.g04350.1.am.mk	#N/A	#N/A	#N/A	up	3.02519e-09
Zjn_sc00002.1.g04390.1.sm.mkhc	#N/A	#N/A	#N/A	down	0.000138282
Zjn_sc00002.1.g04530.1.am.mk	#N/A	#N/A	#N/A	up	2.60754e-06
Zjn_sc00002.1.g04650.1.sm.mkhc	#N/A	#N/A	#N/A	down	9.45466e-06
Zjn_sc00002.1.g04710.1.am.mk	#N/A	#N/A	#N/A	up	5.58404e-05
Zjn_sc00002.1.g04780.1.am.mkhc	#N/A	#N/A	#N/A	down	3.2827e-05
Zjn_sc00002.1.g04900.1.sm.mkhc	#N/A	#N/A	#N/A	down	1.10106e-05
Zjn_sc00002.1.g05070.1.sm.mk	Zjn_sc00002.1.g05070.1.sm.mk.mRNA	STE_STE11	PK	down	0.003413
Zjn_sc00002.1.g05130.1.am.mkhc	#N/A	#N/A	#N/A	down	2.66192e-14
Zjn_sc00002.1.g05200.1.sm.mk	#N/A	#N/A	#N/A	up	9.37172e-09
Zjn_sc00002.1.g05240.1.sm.mkhc	#N/A	#N/A	#N/A	up	0.00750452
Zjn_sc00002.1.g05260.1.sm.mk	#N/A	#N/A	#N/A	up	0.000531274
Zjn_sc00002.1.g05330.1.am.mkhc	#N/A	#N/A	#N/A	down	0.00534597
Zjn_sc00002.1.g05600.1.am.mkhc	#N/A	#N/A	#N/A	up	1.90141e-10
Zjn_sc00002.1.g05820.1.am.mk	#N/A	#N/A	#N/A	up	1.38456e-05
Zjn_sc00002.1.g05850.1.sm.mkhc	#N/A	#N/A	#N/A	up	0.000490718
Zjn_sc00002.1.g05940.1.sm.mkhc	#N/A	#N/A	#N/A	up	1.88355e-08
Zjn_sc00002.1.g05970.1.sm.mkhc	#N/A	#N/A	#N/A	up	8.13122e-07
Zjn_sc00002.1.g06090.1.am.mk	#N/A	#N/A	#N/A	down	9.07816e-06
Zjn_sc00002.1.g06210.1.am.mk	#N/A	#N/A	#N/A	up	2.64538e-11
Zjn_sc00002.1.g06380.1.sm.mkhc	#N/A	#N/A	#N/A	up	2.00831e-05
Zjn_sc00002.1.g06750.1.sm.mkhc	#N/A	#N/A	#N/A	up	0.000126724
Zjn_sc00002.1.g06850.1.sm.mkhc	#N/A	#N/A	#N/A	up	8.10218e-05
Zjn_sc00002.1.g06880.1.sm.mkhc	#N/A	#N/A	#N/A	down	7.48034e-08
Zjn_sc00002.1.g07410.1.sm.mk	#N/A	#N/A	#N/A	down	0.00266106
Zjn_sc00002.1.g07450.1.sm.mk	#N/A	#N/A	#N/A	up	7.71772e-05
Zjn_sc00002.1.g07480.1.am.mk	#N/A	#N/A	#N/A	up	0.000212834
Zjn_sc00002.1.g07520.1.sm.mk	#N/A	#N/A	#N/A	down	0.00286988
Zjn_sc00002.1.g07580.1.sm.mkhc	#N/A	#N/A	#N/A	down	1.1222e-06
Zjn_sc00002.1.g07640.1.sm.mkhc	#N/A	#N/A	#N/A	down	1.15774e-06
Zjn_sc00002.1.g07680.1.sm.mkhc	#N/A	#N/A	#N/A	up	1.42981e-17
Zjn_sc00002.1.g07770.1.sm.mkhc	#N/A	#N/A	#N/A	down	0.000290558
Zjn_sc00002.1.g07800.1.sm.mk	#N/A	#N/A	#N/A	down	1.19214e-07
Zjn_sc00002.1.g07930.1.am.mk	PB.674.1	RLK-Pelle_RLCK-XI	PK	up	0.00208587
Zjn_sc00002.1.g07970.1.am.mk	Zjn_sc00002.1.g07970.1.am.mk.mRNA	NF-YC	TF	down	4.47915e-11
Zjn_sc00002.1.g08110.1.sm.mkhc	#N/A	#N/A	#N/A	down	0.0033461
Zjn_sc00002.1.g08150.1.am.mk	#N/A	#N/A	#N/A	down	5.32899e-12
Zjn_sc00002.1.g08220.1.sm.mkhc	#N/A	#N/A	#N/A	up	1.25156e-05
Zjn_sc00002.1.g08390.1.sm.mkhc	#N/A	#N/A	#N/A	up	1.88245e-11
Zjn_sc00002.1.g08440.1.am.mk	#N/A	#N/A	#N/A	down	0.000322058
Zjn_sc00002.1.g08450.1.am.mk	#N/A	#N/A	#N/A	down	1.65457e-07
Zjn_sc00002.1.g08540.1.sm.mk	#N/A	#N/A	#N/A	up	9.99289e-06
Zjn_sc00002.1.g08760.1.am.mk	PB.701.3	RLK-Pelle_RLCK-VI	PK	up	1.51153e-12
Zjn_sc00002.1.g08780.1.sm.mkhc	#N/A	#N/A	#N/A	down	2.10771e-05
Zjn_sc00002.1.g09010.1.sm.mkhc	#N/A	#N/A	#N/A	up	0.000573138
Zjn_sc00002.1.g09050.1.sm.mkhc	#N/A	#N/A	#N/A	up	7.11491e-09
Zjn_sc00002.1.g09110.1.sm.mkhc	#N/A	#N/A	#N/A	up	7.66519e-05
Zjn_sc00002.1.g09200.1.am.mk	#N/A	#N/A	#N/A	down	8.73362e-07
Zjn_sc00002.1.g09310.1.sm.mkhc	#N/A	#N/A	#N/A	down	3.90588e-08
Zjn_sc00002.1.g09360.1.am.mk	#N/A	#N/A	#N/A	down	6.23274e-07
Zjn_sc00002.1.g09400.1.sm.mkhc	#N/A	#N/A	#N/A	up	2.52351e-06
Zjn_sc00002.1.g09440.1.am.mk	PB.728.1	HB-HD-ZIP	TF	down	0.000122962
Zjn_sc00002.1.g09450.1.sm.mkhc	#N/A	#N/A	#N/A	up	9.15472e-26
Zjn_sc00002.1.g09550.1.am.mk	#N/A	#N/A	#N/A	down	1.33356e-08
Zjn_sc00002.1.g09820.1.sm.mkhc	#N/A	#N/A	#N/A	up	1.02404e-15
Zjn_sc00002.1.g09910.1.sm.mkhc	#N/A	#N/A	#N/A	up	1.12023e-05
Zjn_sc00002.1.g09970.1.sm.mkhc	#N/A	#N/A	#N/A	up	0.00077842
Zjn_sc00002.1.g10050.1.sm.mk	#N/A	#N/A	#N/A	down	0.000148144
Zjn_sc00002.1.g10060.1.am.mk	#N/A	#N/A	#N/A	up	1.79842e-24
Zjn_sc00002.1.g10070.1.sm.mk	#N/A	#N/A	#N/A	up	5.30314e-12
Zjn_sc00002.1.g10130.1.sm.mkhc	#N/A	#N/A	#N/A	up	2.49023e-06
Zjn_sc00002.1.g10360.1.sm.mkhc	#N/A	#N/A	#N/A	up	3.0846e-08
Zjn_sc00002.1.g10530.1.am.mkhc	#N/A	#N/A	#N/A	up	0.000181666
Zjn_sc00002.1.g10550.1.am.mkhc	#N/A	#N/A	#N/A	up	5.33579e-05
Zjn_sc00002.1.g10570.1.am.mk	#N/A	#N/A	#N/A	up	0.000628818
Zjn_sc00002.1.g10750.1.am.mk	#N/A	#N/A	#N/A	up	4.17787e-07
Zjn_sc00002.1.g10850.1.am.mk	Zjn_sc00002.1.g10850.1.am.mk.mRNA	TRAF	TR	down	0.000430203
Zjn_sc00002.1.g11050.1.am.mk	#N/A	#N/A	#N/A	down	0.0016357
Zjn_sc00002.1.g11100.1.sm.mkhc	#N/A	#N/A	#N/A	up	2.46891e-05
Zjn_sc00002.1.g11120.1.sm.mkhc	#N/A	#N/A	#N/A	up	1.11689e-08
Zjn_sc00002.1.g11200.1.sm.mkhc	#N/A	#N/A	#N/A	up	0.000236131
Zjn_sc00002.1.g11350.1.sm.mk	#N/A	#N/A	#N/A	up	2.91579e-09
Zjn_sc00002.1.g11380.1.sm.mkhc	#N/A	#N/A	#N/A	up	7.26156e-11
Zjn_sc00002.1.g11580.1.am.mk	#N/A	#N/A	#N/A	down	4.61058e-32
Zjn_sc00002.1.g11620.1.sm.mk	#N/A	#N/A	#N/A	up	5.44082e-06
Zjn_sc00002.1.g11770.1.am.mk	#N/A	#N/A	#N/A	up	5.02425e-11
Zjn_sc00002.1.g11970.1.am.mk	#N/A	#N/A	#N/A	down	0.000115613
Zjn_sc00002.1.g12150.1.sm.mkhc	PB.822.1	HB-HD-ZIP	TF	up	9.83398e-08
Zjn_sc00002.1.g12180.1.am.mk	#N/A	#N/A	#N/A	down	1.10413e-16
Zjn_sc00002.1.g12220.1.sm.mkhc	#N/A	#N/A	#N/A	down	1.60559e-17
Zjn_sc00002.1.g12330.1.am.mk	#N/A	#N/A	#N/A	up	0.000106713
Zjn_sc00002.1.g12430.1.sm.mkhc	#N/A	#N/A	#N/A	down	2.8103e-15
Zjn_sc00002.1.g12480.1.sm.mkhc	PB.833.1	AP2/ERF-ERF	TF	up	6.63132e-05
Zjn_sc00002.1.g12600.1.sm.mkhc	PB.839.1	Tify	TF	up	8.20265e-07
Zjn_sc00002.1.g12780.1.sm.mkhc	Zjn_sc00002.1.g12780.1.sm.mkhc.mRNA	AP2/ERF-AP2	TF	up	0.000916556
Zjn_sc00002.1.g12820.1.am.mk	#N/A	#N/A	#N/A	down	0.00287711
Zjn_sc00002.1.g12880.1.am.mkhc	PB.848.1	NF-YA	TF	down	1.60911e-06
Zjn_sc00002.1.g12940.1.sm.mkhc	#N/A	#N/A	#N/A	up	1.30464e-13
Zjn_sc00002.1.g13180.1.am.mk	#N/A	#N/A	#N/A	down	0.000574154
Zjn_sc00002.1.g13310.1.sm.mkhc	#N/A	#N/A	#N/A	up	2.23732e-18
Zjn_sc00002.1.g13660.1.am.mk	#N/A	#N/A	#N/A	down	2.46891e-05
Zjn_sc00002.1.g13730.1.am.mk	PB.878.1	HSF	TF	down	0.00314818
Zjn_sc00002.1.g13810.1.sm.mk	#N/A	#N/A	#N/A	up	7.4285e-25
Zjn_sc00002.1.g13830.1.sm.mkhc	#N/A	#N/A	#N/A	up	1.57021e-11
Zjn_sc00002.1.g13950.1.am.mk	#N/A	#N/A	#N/A	down	1.5343e-06
Zjn_sc00002.1.g13990.1.am.mk	#N/A	#N/A	#N/A	down	4.17686e-12
Zjn_sc00002.1.g14000.1.am.mkhc	#N/A	#N/A	#N/A	down	1.24711e-18
Zjn_sc00002.1.g14080.1.sm.mkhc	#N/A	#N/A	#N/A	up	0.00111727
Zjn_sc00002.1.g14120.1.sm.mkhc	#N/A	#N/A	#N/A	up	9.05053e-15
Zjn_sc00002.1.g14220.1.am.mk	#N/A	#N/A	#N/A	up	0.00559701
Zjn_sc00002.1.g14470.1.sm.mkhc	#N/A	#N/A	#N/A	down	2.17424e-31
Zjn_sc00002.1.g14770.1.sm.mkhc	#N/A	#N/A	#N/A	up	1.01128e-11
Zjn_sc00002.1.g14880.1.sm.mkhc	#N/A	#N/A	#N/A	down	1.15507e-17
Zjn_sc00002.1.g14920.1.am.mk	#N/A	#N/A	#N/A	down	5.51626e-05
Zjn_sc00002.1.g15070.1.sm.mk	#N/A	#N/A	#N/A	down	4.80107e-09
Zjn_sc00002.1.g15120.1.am.mkhc	#N/A	#N/A	#N/A	up	9.89072e-10
Zjn_sc00002.1.g15370.1.sm.mkhc	#N/A	#N/A	#N/A	down	4.57802e-11
Zjn_sc00002.1.g15400.1.sm.mkhc	#N/A	#N/A	#N/A	down	8.99832e-08
Zjn_sc00002.1.g15410.1.sm.mk	#N/A	#N/A	#N/A	down	0.00166755
Zjn_sc00002.1.g15420.1.sm.mkhc	#N/A	#N/A	#N/A	up	0.00618514
Zjn_sc00002.1.g15450.1.sm.mkhc	PB.941.2	NAC	TF	down	1.4073e-05
Zjn_sc00002.1.g15540.1.am.mk	#N/A	#N/A	#N/A	down	1.0035e-10
Zjn_sc00002.1.g15610.1.am.mkhc	#N/A	#N/A	#N/A	down	0.00110094
Zjn_sc00002.1.g15810.1.am.mk	#N/A	#N/A	#N/A	down	2.32124e-35
Zjn_sc00002.1.g15870.1.am.mk	#N/A	#N/A	#N/A	down	1.33371e-08
Zjn_sc00002.1.g15880.1.am.mkhc	Zjn_sc00002.1.g15880.1.am.mkhc.mRNA	CAMK_CDPK	PK	up	1.97864e-08
Zjn_sc00002.1.g16010.1.sm.mk	PB.962.1	RLK-Pelle_LRR-VII-1	PK	down	2.45762e-06
Zjn_sc00002.1.g16140.1.sm.mk	#N/A	#N/A	#N/A	up	1.149e-10
Zjn_sc00002.1.g16170.1.am.mk	#N/A	#N/A	#N/A	down	1.15467e-38
Zjn_sc00002.1.g16220.1.am.mk	#N/A	#N/A	#N/A	down	2.14299e-11
Zjn_sc00002.1.g16430.1.sm.mkhc	#N/A	#N/A	#N/A	down	5.82644e-12
Zjn_sc00002.1.g16490.1.am.mk	#N/A	#N/A	#N/A	down	6.9119e-20
Zjn_sc00002.1.g16820.1.sm.mk	#N/A	#N/A	#N/A	down	3.82636e-08
Zjn_sc00002.1.g16910.1.sm.mkhc	#N/A	#N/A	#N/A	up	3.09381e-11
Zjn_sc00002.1.g17000.1.sm.mkhc	#N/A	#N/A	#N/A	up	4.50368e-08
Zjn_sc00002.1.g17040.1.sm.mk	#N/A	#N/A	#N/A	down	6.52548e-13
Zjn_sc00002.1.g17080.1.sm.mkhc	Zjn_sc00002.1.g17080.1.sm.mkhc.mRNA	Trihelix	TF	up	2.30533e-10
Zjn_sc00002.1.g17170.1.am.mk	#N/A	#N/A	#N/A	up	8.48725e-07
Zjn_sc00002.1.g17180.1.am.mk	#N/A	#N/A	#N/A	down	3.36689e-13
Zjn_sc00002.1.g17190.1.sm.mkhc	#N/A	#N/A	#N/A	up	5.48123e-08
Zjn_sc00002.1.g17330.1.am.mkhc	#N/A	#N/A	#N/A	up	1.093e-08
Zjn_sc00002.1.g17600.1.am.mk	#N/A	#N/A	#N/A	up	8.02305e-06
Zjn_sc00003.1.g00190.1.am.mk	Zjn_sc00003.1.g00190.1.am.mk.mRNA	mTERF	TR	down	3.56818e-05
Zjn_sc00003.1.g00230.1.sm.mk	#N/A	#N/A	#N/A	down	8.35548e-08
Zjn_sc00003.1.g00440.1.am.mk	#N/A	#N/A	#N/A	up	1.89484e-09
Zjn_sc00003.1.g00580.1.sm.mk	#N/A	#N/A	#N/A	down	1.4763e-09
Zjn_sc00003.1.g00610.1.sm.mkhc	#N/A	#N/A	#N/A	down	5.46169e-06
Zjn_sc00003.1.g00980.1.sm.mkhc	#N/A	#N/A	#N/A	up	8.57163e-05
Zjn_sc00003.1.g01060.1.am.mkhc	PB.1068.2	CAMK_CAMKL-CHK1	PK	up	4.37852e-22
Zjn_sc00003.1.g01160.1.am.mk	#N/A	#N/A	#N/A	down	6.43811e-05
Zjn_sc00003.1.g01180.1.am.mkhc	#N/A	#N/A	#N/A	up	0.0022786
Zjn_sc00003.1.g01290.1.am.mkhc	PB.1077.1	AGC-Pl	PK	up	2.45355e-09
Zjn_sc00003.1.g01295.1.br	#N/A	#N/A	#N/A	down	6.43567e-07
Zjn_sc00003.1.g01360.1.sm.mk	#N/A	#N/A	#N/A	up	7.09239e-15
Zjn_sc00003.1.g01450.1.sm.mkhc	#N/A	#N/A	#N/A	down	5.10807e-09
Zjn_sc00003.1.g01480.1.sm.mkhc	#N/A	#N/A	#N/A	down	0.0016122
Zjn_sc00003.1.g01710.1.sm.mkhc	Zjn_sc00003.1.g01710.1.sm.mkhc.mRNA	NAC	TF	up	1.25959e-13
Zjn_sc00003.1.g01950.1.sm.mk	Zjn_sc00003.1.g01950.1.sm.mk.mRNA	EIL	TF	up	3.49728e-06
Zjn_sc00003.1.g02090.1.sm.mkhc	#N/A	#N/A	#N/A	down	3.28069e-08
Zjn_sc00003.1.g02120.1.sm.mkhc	Zjn_sc00003.1.g02120.1.sm.mkhc.mRNA	WRKY	TF	up	2.3628e-08
Zjn_sc00003.1.g02350.1.sm.mkhc	#N/A	#N/A	#N/A	down	6.13795e-08
Zjn_sc00003.1.g02370.1.sm.mkhc	Zjn_sc00003.1.g02370.1.sm.mkhc.mRNA	MYB	TF	up	3.07759e-09
Zjn_sc00003.1.g02430.1.sm.mkhc	#N/A	#N/A	#N/A	up	1.67853e-08
Zjn_sc00003.1.g02540.1.am.mk	#N/A	#N/A	#N/A	down	0.00455942
Zjn_sc00003.1.g03010.1.sm.mkhc	Zjn_sc00003.1.g03010.1.sm.mkhc.mRNA	PHD	TR	up	0.000250472
Zjn_sc00003.1.g03080.1.am.mk	#N/A	#N/A	#N/A	down	0.000445734
Zjn_sc00003.1.g03180.1.sm.mkhc	#N/A	#N/A	#N/A	up	1.21235e-07
Zjn_sc00003.1.g03260.1.sm.mk	#N/A	#N/A	#N/A	up	0.000234574
Zjn_sc00003.1.g03330.1.am.mk	#N/A	#N/A	#N/A	down	8.46092e-06
Zjn_sc00003.1.g03420.1.sm.mkhc	#N/A	#N/A	#N/A	up	5.17019e-05
Zjn_sc00003.1.g03630.1.am.mkhc	#N/A	#N/A	#N/A	down	5.73752e-09
Zjn_sc00003.1.g03670.1.sm.mk	#N/A	#N/A	#N/A	down	0.00105009
Zjn_sc00003.1.g03700.1.sm.mk	PB.1167.1	STE_STE11	PK	down	0.00647488
Zjn_sc00003.1.g03790.1.sm.mkhc	#N/A	#N/A	#N/A	up	2.14292e-26
Zjn_sc00003.1.g03940.1.sm.mkhc	#N/A	#N/A	#N/A	up	0.00122062
Zjn_sc00003.1.g04010.1.am.mk	Zjn_sc00003.1.g04010.1.am.mk.mRNA	LOB	TF	up	3.99793e-14
Zjn_sc00003.1.g04190.1.sm.mkhc	#N/A	#N/A	#N/A	down	0.000617132
Zjn_sc00003.1.g04380.1.sm.mkhc	#N/A	#N/A	#N/A	up	0.00194891
Zjn_sc00003.1.g04560.1.am.mk	Zjn_sc00003.1.g04560.1.am.mk.mRNA	C2H2	TF	up	2.7654e-05
Zjn_sc00003.1.g04600.1.am.mkhc	#N/A	#N/A	#N/A	down	4.36415e-09
Zjn_sc00003.1.g04710.1.am.mk	#N/A	#N/A	#N/A	up	2.16715e-05
Zjn_sc00003.1.g04960.1.am.mkhc	#N/A	#N/A	#N/A	up	1.43679e-08
Zjn_sc00003.1.g05070.1.sm.mkhc	#N/A	#N/A	#N/A	up	4.91454e-07
Zjn_sc00003.1.g05200.1.am.mk	#N/A	#N/A	#N/A	down	0.00117169
Zjn_sc00003.1.g05230.1.sm.mkhc	#N/A	#N/A	#N/A	down	2.13528e-08
Zjn_sc00003.1.g05360.1.sm.mkhc	#N/A	#N/A	#N/A	up	3.01251e-25
Zjn_sc00003.1.g05370.1.sm.mkhc	PB.1229.1	Group-Pl-3	PK	up	3.911e-12
Zjn_sc00003.1.g05450.1.sm.mk	#N/A	#N/A	#N/A	up	6.08994e-10
Zjn_sc00003.1.g05480.1.sm.mkhc	#N/A	#N/A	#N/A	down	4.30412e-10
Zjn_sc00003.1.g05600.1.sm.mk	#N/A	#N/A	#N/A	down	0.000151819
Zjn_sc00003.1.g05610.1.sm.mkhc	#N/A	#N/A	#N/A	up	9.25877e-12
Zjn_sc00003.1.g05620.1.am.mkhc	#N/A	#N/A	#N/A	up	0.000668455
Zjn_sc00003.1.g05850.1.sm.mkhc	#N/A	#N/A	#N/A	up	1.6747e-07
Zjn_sc00003.1.g05900.1.sm.mk	#N/A	#N/A	#N/A	down	6.63773e-27
Zjn_sc00003.1.g06140.1.sm.mkhc	#N/A	#N/A	#N/A	down	6.98108e-14
Zjn_sc00003.1.g06190.1.am.mkhc	#N/A	#N/A	#N/A	down	1.95163e-07
Zjn_sc00003.1.g06580.1.sm.mkhc	#N/A	#N/A	#N/A	up	1.9094e-05
Zjn_sc00003.1.g06600.1.am.mkhc	#N/A	#N/A	#N/A	down	0.0037163
Zjn_sc00003.1.g06660.1.am.mk	#N/A	#N/A	#N/A	up	3.3807e-05
Zjn_sc00003.1.g06890.1.sm.mkhc	#N/A	#N/A	#N/A	up	5.17744e-08
Zjn_sc00003.1.g06950.1.am.mk	#N/A	#N/A	#N/A	down	4.6192e-08
Zjn_sc00003.1.g07070.1.sm.mkhc	#N/A	#N/A	#N/A	down	0.000431575
Zjn_sc00003.1.g07220.1.am.mkhc	#N/A	#N/A	#N/A	down	0.000403765
Zjn_sc00003.1.g07230.1.am.mkhc	#N/A	#N/A	#N/A	down	6.83408e-27
Zjn_sc00003.1.g07260.1.sm.mkhc	#N/A	#N/A	#N/A	down	2.23565e-05
Zjn_sc00003.1.g07410.1.sm.mkhc	PB.1308.1	HB-HD-ZIP	TF	down	0.00167481
Zjn_sc00003.1.g07560.1.am.mk	#N/A	#N/A	#N/A	down	9.20614e-05
Zjn_sc00003.1.g07630.1.am.mk	#N/A	#N/A	#N/A	down	1.92745e-06
Zjn_sc00003.1.g07680.1.sm.mkhc	#N/A	#N/A	#N/A	up	1.25738e-09
Zjn_sc00003.1.g07710.1.sm.mkhc	#N/A	#N/A	#N/A	down	1.11089e-07
Zjn_sc00003.1.g07770.1.am.mk	#N/A	#N/A	#N/A	up	3.86914e-11
Zjn_sc00003.1.g07820.1.sm.mkhc	#N/A	#N/A	#N/A	up	1.60091e-14
Zjn_sc00003.1.g07920.1.am.mkhc	#N/A	#N/A	#N/A	down	1.88938e-08
Zjn_sc00003.1.g08420.1.sm.mkhc	#N/A	#N/A	#N/A	down	0.00820756
Zjn_sc00003.1.g08640.1.am.mk	#N/A	#N/A	#N/A	down	1.42888e-11
Zjn_sc00003.1.g08650.1.sm.mkhc	#N/A	#N/A	#N/A	down	0.00395062
Zjn_sc00003.1.g08720.1.sm.mkhc	#N/A	#N/A	#N/A	down	1.98202e-05
Zjn_sc00003.1.g08780.1.sm.mk	#N/A	#N/A	#N/A	down	0.000359811
Zjn_sc00003.1.g08870.1.am.mkhc	#N/A	#N/A	#N/A	up	0.000944191
Zjn_sc00003.1.g08960.1.sm.mkhc	#N/A	#N/A	#N/A	up	3.54814e-14
Zjn_sc00003.1.g08990.1.sm.mk	#N/A	#N/A	#N/A	up	1.11224e-15
Zjn_sc00003.1.g09080.1.am.mk	#N/A	#N/A	#N/A	up	1.14332e-05
Zjn_sc00003.1.g09150.1.am.mk	#N/A	#N/A	#N/A	up	0.000689236
Zjn_sc00003.1.g09190.1.sm.mkhc	Zjn_sc00003.1.g09190.1.sm.mkhc.mRNA	HB-other	TF	up	0.00111059
Zjn_sc00003.1.g09240.1.am.mk	Zjn_sc00003.1.g09240.1.am.mk.mRNA	OFP	TF	up	2.61085e-11
Zjn_sc00003.1.g09650.1.sm.mkhc	#N/A	#N/A	#N/A	down	6.40629e-14
Zjn_sc00003.1.g09740.1.am.mkhc	#N/A	#N/A	#N/A	up	1.98504e-17
Zjn_sc00003.1.g09840.1.sm.mkhc	#N/A	#N/A	#N/A	down	2.27873e-08
Zjn_sc00003.1.g09920.1.am.mk	#N/A	#N/A	#N/A	down	2.14128e-09
Zjn_sc00003.1.g10150.1.sm.mkhc	#N/A	#N/A	#N/A	up	0.000167557
Zjn_sc00003.1.g10420.1.sm.mk	PB.1412.1	AP2/ERF-ERF	TF	down	2.05603e-07
Zjn_sc00003.1.g10550.1.sm.mkhc	#N/A	#N/A	#N/A	up	9.00296e-06
Zjn_sc00003.1.g10580.1.sm.mk	#N/A	#N/A	#N/A	down	1.71297e-05
Zjn_sc00003.1.g10610.1.sm.mkhc	PB.1420.1	Tify	TF	up	7.99808e-10
Zjn_sc00003.1.g10720.1.am.mk	#N/A	#N/A	#N/A	up	1.42981e-17
Zjn_sc00003.1.g10770.1.am.mk	#N/A	#N/A	#N/A	down	6.21876e-05
Zjn_sc00003.1.g10860.1.sm.mkhc	#N/A	#N/A	#N/A	down	5.6981e-14
Zjn_sc00003.1.g10890.1.sm.mkhc	Zjn_sc00003.1.g10890.1.sm.mkhc.mRNA	NF-YA	TF	down	2.0904e-13
Zjn_sc00003.1.g11190.1.am.mkhc	#N/A	#N/A	#N/A	down	0.0029098
Zjn_sc00003.1.g11200.1.am.mkhc	#N/A	#N/A	#N/A	down	2.56629e-08
Zjn_sc00003.1.g11290.1.am.mk	#N/A	#N/A	#N/A	up	0.00818394
Zjn_sc00003.1.g11310.1.am.mk	#N/A	#N/A	#N/A	up	0.00246809
Zjn_sc00003.1.g11540.1.am.mk	Zjn_sc00003.1.g11540.1.am.mk.mRNA	HSF	TF	down	7.02453e-05
Zjn_sc00003.1.g11820.1.sm.mk	#N/A	#N/A	#N/A	up	0.000349296
Zjn_sc00003.1.g11910.1.am.mkhc	#N/A	#N/A	#N/A	down	5.25977e-09
Zjn_sc00003.1.g11920.1.sm.mkhc	#N/A	#N/A	#N/A	down	3.96164e-07
Zjn_sc00003.1.g12210.1.sm.mk	Zjn_sc00003.1.g12210.1.sm.mk.mRNA	AP2/ERF-ERF	TF	down	0.000245517
Zjn_sc00003.1.g12310.1.sm.mk	#N/A	#N/A	#N/A	up	2.46593e-09
Zjn_sc00003.1.g12500.1.sm.mkhc	#N/A	#N/A	#N/A	down	8.06928e-11
Zjn_sc00003.1.g12570.1.am.mk	#N/A	#N/A	#N/A	down	2.10978e-08
Zjn_sc00003.1.g12760.1.sm.mkhc	#N/A	#N/A	#N/A	up	6.88021e-10
Zjn_sc00003.1.g12810.1.sm.mkhc	#N/A	#N/A	#N/A	up	3.83002e-09
Zjn_sc00003.1.g12820.1.sm.mk	#N/A	#N/A	#N/A	up	0.000573016
Zjn_sc00003.1.g12900.1.sm.mkhc	#N/A	#N/A	#N/A	up	5.56985e-06
Zjn_sc00003.1.g12990.1.sm.mkhc	#N/A	#N/A	#N/A	down	0.000459999
Zjn_sc00003.1.g13000.1.sm.mk	#N/A	#N/A	#N/A	down	9.10893e-05
Zjn_sc00003.1.g13160.1.am.mk	#N/A	#N/A	#N/A	down	4.90515e-07
Zjn_sc00003.1.g13280.1.sm.mkhc	#N/A	#N/A	#N/A	down	9.18955e-05
Zjn_sc00003.1.g13690.1.am.mk	#N/A	#N/A	#N/A	down	1.46206e-22
Zjn_sc00003.1.g13740.1.sm.mk	#N/A	#N/A	#N/A	down	0.00343357
Zjn_sc00003.1.g13980.1.sm.mkhc	#N/A	#N/A	#N/A	up	5.88882e-19
Zjn_sc00003.1.g14160.1.sm.mk	#N/A	#N/A	#N/A	up	0.000943747
Zjn_sc00003.1.g14200.1.sm.mkhc	#N/A	#N/A	#N/A	up	1.80485e-09
Zjn_sc00003.1.g14320.1.sm.mkhc	PB.1539.1	HB-KNOX	TF	up	3.13704e-08
Zjn_sc00003.1.g14460.1.sm.mkhc	#N/A	#N/A	#N/A	down	2.10036e-14
Zjn_sc00003.1.g14560.1.sm.mkhc	#N/A	#N/A	#N/A	down	3.80967e-13
Zjn_sc00003.1.g14660.1.sm.mk	#N/A	#N/A	#N/A	down	7.84984e-07
Zjn_sc00003.1.g14800.1.sm.mk	#N/A	#N/A	#N/A	down	0.00384547
Zjn_sc00003.1.g14950.1.am.mk	Zjn_sc00003.1.g14950.1.am.mk.mRNA	Trihelix	TF	up	0.000197655
Zjn_sc00003.1.g15090.1.am.mk	#N/A	#N/A	#N/A	down	2.00832e-07
Zjn_sc00004.1.g00090.1.am.mk	#N/A	#N/A	#N/A	down	0.000320299
Zjn_sc00004.1.g00240.1.sm.mkhc	#N/A	#N/A	#N/A	up	3.84532e-18
Zjn_sc00004.1.g00460.1.am.mk	PB.1602.1	bZIP	TF	down	2.75004e-05
Zjn_sc00004.1.g00470.1.sm.mkhc	Zjn_sc00004.1.g00470.1.sm.mkhc.mRNA	AP2/ERF-ERF	TF	down	8.02059e-05
Zjn_sc00004.1.g00540.1.sm.mkhc	#N/A	#N/A	#N/A	up	8.48866e-11
Zjn_sc00004.1.g00620.1.sm.mkhc	#N/A	#N/A	#N/A	up	2.0294e-12
Zjn_sc00004.1.g00920.1.am.mkhc	#N/A	#N/A	#N/A	down	2.54225e-11
Zjn_sc00004.1.g01050.1.sm.mkhc	#N/A	#N/A	#N/A	up	3.19337e-07
Zjn_sc00004.1.g01055.1.br	#N/A	#N/A	#N/A	up	2.8298e-09
Zjn_sc00004.1.g01230.1.am.mk	#N/A	#N/A	#N/A	down	9.26362e-10
Zjn_sc00004.1.g01390.1.am.mkhc	PB.1628.1	bHLH	TF	up	6.50158e-05
Zjn_sc00004.1.g01520.1.am.mk	#N/A	#N/A	#N/A	down	0.00211793
Zjn_sc00004.1.g01530.1.am.mk	Zjn_sc00004.1.g01530.1.am.mk.mRNA	STE_STE7	PK	up	8.66586e-06
Zjn_sc00004.1.g01670.1.sm.mkhc	#N/A	#N/A	#N/A	down	9.05114e-07
Zjn_sc00004.1.g01860.1.am.mk	PB.1647.1	GARP-ARR-B	TF	up	6.52435e-05
Zjn_sc00004.1.g02260.1.sm.mkhc	#N/A	#N/A	#N/A	down	0.00562437
Zjn_sc00004.1.g02270.1.sm.mk	#N/A	#N/A	#N/A	down	0.00998637
Zjn_sc00004.1.g02510.1.am.mk	#N/A	#N/A	#N/A	down	1.32427e-05
Zjn_sc00004.1.g02910.1.am.mk	PB.1690.1	RLK-Pelle_RLCK-VIII	PK	down	1.57438e-10
Zjn_sc00004.1.g02930.1.am.mkhc	#N/A	#N/A	#N/A	down	2.20187e-08
Zjn_sc00004.1.g03470.1.sm.mkhc	PB.1704.2	C2C2-CO-like	TF	down	0.00131546
Zjn_sc00004.1.g03480.1.am.mk	#N/A	#N/A	#N/A	down	4.40312e-06
Zjn_sc00004.1.g03970.1.sm.mkhc	#N/A	#N/A	#N/A	down	0.00896159
Zjn_sc00004.1.g03990.1.am.mkhc	#N/A	#N/A	#N/A	down	4.71194e-08
Zjn_sc00004.1.g04080.1.am.mk	#N/A	#N/A	#N/A	up	1.90877e-08
Zjn_sc00004.1.g04100.1.am.mk	#N/A	#N/A	#N/A	up	0.0022619
Zjn_sc00004.1.g04150.1.sm.mk	#N/A	#N/A	#N/A	down	1.3768e-05
Zjn_sc00004.1.g04190.1.sm.mkhc	#N/A	#N/A	#N/A	up	6.80373e-28
Zjn_sc00004.1.g04290.1.am.mk	#N/A	#N/A	#N/A	down	0.00375109
Zjn_sc00004.1.g04320.1.sm.mkhc	#N/A	#N/A	#N/A	up	0.000308072
Zjn_sc00004.1.g04350.1.sm.mkhc	#N/A	#N/A	#N/A	down	0.000183729
Zjn_sc00004.1.g04470.1.am.mk	#N/A	#N/A	#N/A	down	0.000338134
Zjn_sc00004.1.g04660.1.am.mk	PB.1743.1	B3-ARF	TF	down	3.24478e-05
Zjn_sc00004.1.g04750.1.am.mk	#N/A	#N/A	#N/A	down	6.41099e-05
Zjn_sc00004.1.g04760.1.am.mkhc	#N/A	#N/A	#N/A	down	1.41083e-06
Zjn_sc00004.1.g04830.1.sm.mkhc	#N/A	#N/A	#N/A	down	6.03311e-06
Zjn_sc00004.1.g04900.1.am.mkhc	#N/A	#N/A	#N/A	down	2.6362e-10
Zjn_sc00004.1.g05080.1.sm.mkhc	#N/A	#N/A	#N/A	up	1.12074e-08
Zjn_sc00004.1.g05150.1.sm.mkhc	#N/A	#N/A	#N/A	down	2.03479e-07
Zjn_sc00004.1.g05255.1.br	#N/A	#N/A	#N/A	down	0.000491068
Zjn_sc00004.1.g05260.1.am.mk	#N/A	#N/A	#N/A	down	9.81854e-05
Zjn_sc00004.1.g05370.1.sm.mkhc	#N/A	#N/A	#N/A	up	0.000121801
Zjn_sc00004.1.g05380.1.sm.mkhc	#N/A	#N/A	#N/A	down	1.78232e-18
Zjn_sc00004.1.g05550.1.am.mk	#N/A	#N/A	#N/A	down	1.69395e-05
Zjn_sc00004.1.g05590.1.sm.mk	#N/A	#N/A	#N/A	up	7.0578e-05
Zjn_sc00004.1.g05650.1.am.mk	#N/A	#N/A	#N/A	down	8.75724e-11
Zjn_sc00004.1.g05670.1.sm.mkhc	#N/A	#N/A	#N/A	down	4.10997e-16
Zjn_sc00004.1.g05740.1.am.mk	PB.1775.5	C2C2-GATA	TF	up	1.00914e-07
Zjn_sc00004.1.g06030.1.am.mk	#N/A	#N/A	#N/A	down	1.62738e-06
Zjn_sc00004.1.g06180.1.sm.mkhc	#N/A	#N/A	#N/A	up	3.17143e-16
Zjn_sc00004.1.g06420.1.sm.mkhc	Zjn_sc00004.1.g06420.1.sm.mkhc.mRNA	HB-HD-ZIP	TF	down	6.26089e-13
Zjn_sc00004.1.g06540.1.am.mk	Zjn_sc00004.1.g06540.1.am.mk.mRNA	AP2/ERF-ERF	TF	up	1.79412e-15
Zjn_sc00004.1.g06560.1.am.mk	#N/A	#N/A	#N/A	down	0.00174582
Zjn_sc00004.1.g06600.1.sm.mkhc	#N/A	#N/A	#N/A	up	2.68922e-06
Zjn_sc00004.1.g06610.1.sm.mkhc	#N/A	#N/A	#N/A	up	9.62492e-17
Zjn_sc00004.1.g06960.1.sm.mkhc	#N/A	#N/A	#N/A	up	1.55587e-10
Zjn_sc00004.1.g06970.1.sm.mk	#N/A	#N/A	#N/A	up	2.17713e-18
Zjn_sc00004.1.g06980.1.am.mk	#N/A	#N/A	#N/A	up	0.0010335
Zjn_sc00004.1.g07010.1.sm.mk	PB.1809.1	bHLH	TF	down	0.000190212
Zjn_sc00004.1.g07050.1.am.mk	#N/A	#N/A	#N/A	down	1.2195e-06
Zjn_sc00004.1.g07070.1.am.mkhc	#N/A	#N/A	#N/A	up	6.82141e-07
Zjn_sc00004.1.g07090.1.sm.mkhc	#N/A	#N/A	#N/A	down	1.96892e-11
Zjn_sc00004.1.g07170.1.am.mk	#N/A	#N/A	#N/A	up	3.1825e-06
Zjn_sc00004.1.g07180.1.sm.mk	#N/A	#N/A	#N/A	up	1.33114e-12
Zjn_sc00004.1.g07220.1.am.mkhc	#N/A	#N/A	#N/A	down	8.77652e-08
Zjn_sc00004.1.g07410.1.sm.mkhc	#N/A	#N/A	#N/A	down	2.90468e-07
Zjn_sc00004.1.g07680.1.am.mk	Zjn_sc00004.1.g07680.1.am.mk.mRNA	AP2/ERF-ERF	TF	down	2.69371e-06
Zjn_sc00004.1.g07800.1.sm.mk	#N/A	#N/A	#N/A	up	1.8052e-06
Zjn_sc00004.1.g07810.1.sm.mkhc	#N/A	#N/A	#N/A	up	3.39778e-08
Zjn_sc00004.1.g07920.1.cf.mkhc	#N/A	#N/A	#N/A	down	2.56458e-09
Zjn_sc00004.1.g07930.1.am.mk	#N/A	#N/A	#N/A	down	1.77454e-21
Zjn_sc00004.1.g08100.1.sm.mkhc	#N/A	#N/A	#N/A	up	6.22537e-06
Zjn_sc00004.1.g08440.1.am.mk	#N/A	#N/A	#N/A	down	0.000144444
Zjn_sc00004.1.g08490.1.sm.mkhc	#N/A	#N/A	#N/A	down	3.59715e-13
Zjn_sc00004.1.g08510.1.am.mk	#N/A	#N/A	#N/A	down	3.43911e-05
Zjn_sc00004.1.g08770.1.am.mk	#N/A	#N/A	#N/A	up	3.47189e-07
Zjn_sc00004.1.g08920.1.sm.mk	#N/A	#N/A	#N/A	down	2.65068e-06
Zjn_sc00004.1.g08970.1.am.mk	#N/A	#N/A	#N/A	down	3.93815e-08
Zjn_sc00004.1.g09050.1.am.mkhc	#N/A	#N/A	#N/A	up	2.01188e-07
Zjn_sc00004.1.g09170.1.am.mkhc	#N/A	#N/A	#N/A	down	3.19404e-15
Zjn_sc00004.1.g09180.1.sm.mkhc	PB.1882.1	Trihelix	TF	up	1.01767e-07
Zjn_sc00004.1.g09840.1.am.mkhc	Zjn_sc00004.1.g09840.1.am.mkhc.mRNA	TKL_CTR1-DRK-2	PK	up	2.65291e-06
Zjn_sc00004.1.g09920.1.am.mk	#N/A	#N/A	#N/A	down	1.83089e-09
Zjn_sc00004.1.g09940.1.am.mk	#N/A	#N/A	#N/A	down	5.33991e-06
Zjn_sc00004.1.g10010.1.am.mk	#N/A	#N/A	#N/A	up	1.4945e-12
Zjn_sc00004.1.g10020.1.sm.mkhc	#N/A	#N/A	#N/A	down	9.799e-08
Zjn_sc00004.1.g10150.1.sm.mkhc	#N/A	#N/A	#N/A	up	1.15419e-09
Zjn_sc00004.1.g10240.1.sm.mkhc	Zjn_sc00004.1.g10240.1.sm.mkhc.mRNA	NAC	TF	up	2.4625e-44
Zjn_sc00004.1.g10410.1.sm.mkhc	#N/A	#N/A	#N/A	up	3.14863e-12
Zjn_sc00004.1.g10580.1.sm.mk	#N/A	#N/A	#N/A	down	3.48883e-10
Zjn_sc00004.1.g10780.1.am.mkhc	#N/A	#N/A	#N/A	down	0.00671857
Zjn_sc00004.1.g10810.1.sm.mk	#N/A	#N/A	#N/A	down	1.26924e-05
Zjn_sc00004.1.g10830.1.am.mk	#N/A	#N/A	#N/A	down	5.79055e-07
Zjn_sc00004.1.g10910.1.sm.mkhc	PB.1946.1	RLK-Pelle_DLSV	PK	up	5.29357e-12
Zjn_sc00004.1.g11010.1.sm.mk	#N/A	#N/A	#N/A	up	0.00014587
Zjn_sc00004.1.g11030.1.am.mk	#N/A	#N/A	#N/A	up	7.34556e-07
Zjn_sc00004.1.g11040.1.am.mk	#N/A	#N/A	#N/A	down	8.39086e-18
Zjn_sc00004.1.g11150.1.am.mk	#N/A	#N/A	#N/A	up	1.47577e-08
Zjn_sc00004.1.g11290.1.am.mk	#N/A	#N/A	#N/A	down	1.21148e-18
Zjn_sc00004.1.g11310.1.sm.mkhc	#N/A	#N/A	#N/A	up	1.90016e-08
Zjn_sc00004.1.g11330.1.sm.mkhc	#N/A	#N/A	#N/A	up	7.89825e-08
Zjn_sc00004.1.g11430.1.sm.mkhc	#N/A	#N/A	#N/A	down	0.00210335
Zjn_sc00004.1.g11600.1.am.mk	#N/A	#N/A	#N/A	down	6.96496e-05
Zjn_sc00004.1.g11650.1.sm.mkhc	#N/A	#N/A	#N/A	down	2.17283e-11
Zjn_sc00004.1.g11730.1.sm.mkhc	#N/A	#N/A	#N/A	up	9.30116e-16
Zjn_sc00004.1.g11910.1.sm.mkhc	#N/A	#N/A	#N/A	up	7.45772e-19
Zjn_sc00004.1.g11920.1.sm.mkhc	#N/A	#N/A	#N/A	up	3.06527e-12
Zjn_sc00004.1.g11930.1.am.mk	#N/A	#N/A	#N/A	up	0.000328785
Zjn_sc00004.1.g12030.1.sm.mkhc	#N/A	#N/A	#N/A	down	1.7326e-05
Zjn_sc00004.1.g12110.1.am.mkhc	#N/A	#N/A	#N/A	up	5.78581e-09
Zjn_sc00004.1.g12140.1.am.mk	Zjn_sc00004.1.g12140.1.am.mk.mRNA	RLK-Pelle_SD-2b	PK	down	1.55181e-05
Zjn_sc00004.1.g12150.1.am.mk	#N/A	#N/A	#N/A	up	2.53845e-09
Zjn_sc00004.1.g12320.1.sm.mkhc	#N/A	#N/A	#N/A	down	4.18762e-19
Zjn_sc00004.1.g12490.1.am.mk	#N/A	#N/A	#N/A	up	0.00435605
Zjn_sc00004.1.g12950.1.sm.mk	Zjn_sc00004.1.g12950.1.sm.mk.mRNA	AP2/ERF-ERF	TF	down	0.000269683
Zjn_sc00004.1.g13010.1.am.mkhc	#N/A	#N/A	#N/A	up	1.18402e-07
Zjn_sc00004.1.g13120.1.sm.mkhc	PB.2037.1	AUX/IAA	TR	up	4.31989e-07
Zjn_sc00004.1.g13300.1.am.mk	#N/A	#N/A	#N/A	up	2.84558e-06
Zjn_sc00004.1.g13310.1.am.mk	#N/A	#N/A	#N/A	up	7.62019e-18
Zjn_sc00004.1.g13320.1.am.mk	#N/A	#N/A	#N/A	up	3.48112e-08
Zjn_sc00004.1.g13480.1.sm.mk	#N/A	#N/A	#N/A	down	1.38256e-06
Zjn_sc00004.1.g13500.1.sm.mk	#N/A	#N/A	#N/A	up	7.36813e-05
Zjn_sc00004.1.g13510.1.am.mk	#N/A	#N/A	#N/A	up	1.38117e-13
Zjn_sc00004.1.g13590.1.sm.mkhc	Zjn_sc00004.1.g13590.1.sm.mkhc.mRNA	C2C2-Dof	TF	up	2.06879e-05
Zjn_sc00004.1.g13650.1.am.mk	#N/A	#N/A	#N/A	up	4.40723e-05
Zjn_sc00004.1.g13780.1.sm.mkhc	#N/A	#N/A	#N/A	up	1.21821e-10
Zjn_sc00004.1.g13940.1.am.mk	#N/A	#N/A	#N/A	down	5.02224e-19
Zjn_sc00004.1.g13960.1.am.mk	#N/A	#N/A	#N/A	down	0.000530861
Zjn_sc00004.1.g13980.1.sm.mk	#N/A	#N/A	#N/A	up	0.0004982
Zjn_sc00004.1.g14040.1.sm.mkhc	Zjn_sc00004.1.g14040.1.sm.mkhc.mRNA	RLK-Pelle_LRR-IX	PK	down	0.00093763
Zjn_sc00004.1.g14220.1.sm.mk	#N/A	#N/A	#N/A	up	0.00086788
Zjn_sc00004.1.g14250.1.sm.mk	#N/A	#N/A	#N/A	down	8.89858e-14
Zjn_sc00004.1.g14265.1.br	#N/A	#N/A	#N/A	up	0.000232658
Zjn_sc00004.1.g14270.1.sm.mkhc	#N/A	#N/A	#N/A	up	0.000246875
Zjn_sc00004.1.g14280.1.sm.mk	Zjn_sc00004.1.g14280.1.sm.mk.mRNA	NAC	TF	down	1.37721e-06
Zjn_sc00005.1.g00480.1.am.mkhc	#N/A	#N/A	#N/A	down	4.70686e-07
Zjn_sc00005.1.g00680.1.sm.mk	#N/A	#N/A	#N/A	down	0.000493204
Zjn_sc00005.1.g00750.1.sm.mkhc	#N/A	#N/A	#N/A	down	3.29409e-05
Zjn_sc00005.1.g00810.1.sm.mkhc	#N/A	#N/A	#N/A	down	0.00192012
Zjn_sc00005.1.g00900.1.sm.mk	#N/A	#N/A	#N/A	up	4.53938e-07
Zjn_sc00005.1.g01290.1.am.mk	#N/A	#N/A	#N/A	up	0.00427035
Zjn_sc00005.1.g01360.1.sm.mkhc	#N/A	#N/A	#N/A	up	8.7952e-07
Zjn_sc00005.1.g01580.1.sm.mkhc	#N/A	#N/A	#N/A	down	1.17726e-05
Zjn_sc00005.1.g01610.1.sm.mk	PB.2143.1	RLK-Pelle_L-LEC	PK	up	1.97456e-10
Zjn_sc00005.1.g01710.1.sm.mkhc	#N/A	#N/A	#N/A	down	1.6982e-06
Zjn_sc00005.1.g01730.1.am.mk	PB.2149.1	RLK-Pelle_RLCK-VIII	PK	up	2.10815e-09
Zjn_sc00005.1.g01830.1.sm.mkhc	#N/A	#N/A	#N/A	down	8.39609e-08
Zjn_sc00005.1.g01880.1.am.mk	Zjn_sc00005.1.g01880.1.am.mk.mRNA	Trihelix	TF	up	9.3903e-05
Zjn_sc00005.1.g01940.1.am.mkhc	#N/A	#N/A	#N/A	up	1.25954e-08
Zjn_sc00005.1.g02060.1.sm.mkhc	Zjn_sc00005.1.g02060.1.sm.mkhc.mRNA	AP2/ERF-ERF	TF	up	7.86927e-06
Zjn_sc00005.1.g02370.1.am.mk	#N/A	#N/A	#N/A	down	3.26642e-10
Zjn_sc00005.1.g02480.1.am.mk	#N/A	#N/A	#N/A	down	7.29383e-06
Zjn_sc00005.1.g02610.1.am.mk	#N/A	#N/A	#N/A	up	1.45143e-21
Zjn_sc00005.1.g02990.1.sm.mkhc	#N/A	#N/A	#N/A	down	1.92034e-10
Zjn_sc00005.1.g03040.1.am.mk	#N/A	#N/A	#N/A	up	5.91777e-08
Zjn_sc00005.1.g03070.1.sm.mkhc	#N/A	#N/A	#N/A	up	2.09506e-08
Zjn_sc00005.1.g03130.1.sm.mkhc	#N/A	#N/A	#N/A	down	1.40581e-06
Zjn_sc00005.1.g03190.1.sm.mkhc	#N/A	#N/A	#N/A	up	7.54606e-07
Zjn_sc00005.1.g03400.1.sm.mk	#N/A	#N/A	#N/A	up	1.00192e-07
Zjn_sc00005.1.g03820.1.am.mk	#N/A	#N/A	#N/A	up	1.82302e-23
Zjn_sc00005.1.g04030.1.sm.mk	#N/A	#N/A	#N/A	down	0.00482006
Zjn_sc00005.1.g04340.1.am.mk	#N/A	#N/A	#N/A	down	4.19441e-06
Zjn_sc00005.1.g04410.1.sm.mkhc	Zjn_sc00005.1.g04410.1.sm.mkhc.mRNA	AUX/IAA	TR	down	2.26644e-07
Zjn_sc00005.1.g04550.1.sm.mkhc	#N/A	#N/A	#N/A	up	0.000253201
Zjn_sc00005.1.g04560.1.am.mk	#N/A	#N/A	#N/A	up	0.000606351
Zjn_sc00005.1.g04620.1.sm.mk	#N/A	#N/A	#N/A	down	0.00131048
Zjn_sc00005.1.g04640.1.am.mk	#N/A	#N/A	#N/A	down	2.24385e-08
Zjn_sc00005.1.g04940.1.am.mk	#N/A	#N/A	#N/A	up	0.00664058
Zjn_sc00005.1.g05130.1.sm.mkhc	#N/A	#N/A	#N/A	up	1.86172e-09
Zjn_sc00005.1.g05330.1.am.mk	Zjn_sc00005.1.g05330.1.am.mk.mRNA	bHLH	TF	up	6.53091e-18
Zjn_sc00005.1.g05360.1.sm.mkhc	#N/A	#N/A	#N/A	up	6.65391e-08
Zjn_sc00005.1.g05510.1.am.mk	#N/A	#N/A	#N/A	down	0.000838008
Zjn_sc00005.1.g05790.1.sm.mkhc	#N/A	#N/A	#N/A	down	3.33322e-07
Zjn_sc00005.1.g05860.1.sm.mkhc	#N/A	#N/A	#N/A	down	4.7735e-12
Zjn_sc00005.1.g05900.1.am.mkhc	#N/A	#N/A	#N/A	up	7.18943e-06
Zjn_sc00005.1.g05950.1.sm.mk	#N/A	#N/A	#N/A	down	1.51208e-12
Zjn_sc00005.1.g06040.1.am.mk	#N/A	#N/A	#N/A	up	4.04611e-10
Zjn_sc00005.1.g06110.1.sm.mkhc	#N/A	#N/A	#N/A	down	3.10695e-12
Zjn_sc00005.1.g06390.1.am.mk	#N/A	#N/A	#N/A	up	3.01482e-07
Zjn_sc00005.1.g06400.1.am.mk	#N/A	#N/A	#N/A	up	9.74064e-15
Zjn_sc00005.1.g06570.1.am.mk	#N/A	#N/A	#N/A	down	6.90351e-08
Zjn_sc00005.1.g06720.1.am.mkhc	#N/A	#N/A	#N/A	down	0.000372951
Zjn_sc00005.1.g06750.1.am.mk	#N/A	#N/A	#N/A	up	0.00208961
Zjn_sc00005.1.g06780.1.sm.mkhc	#N/A	#N/A	#N/A	down	0.00797649
Zjn_sc00005.1.g06840.1.sm.mkhc	#N/A	#N/A	#N/A	down	8.24875e-12
Zjn_sc00005.1.g06950.1.sm.mkhc	#N/A	#N/A	#N/A	up	7.76373e-17
Zjn_sc00005.1.g06970.1.am.mk	#N/A	#N/A	#N/A	up	4.44102e-10
Zjn_sc00005.1.g06980.1.sm.mk	#N/A	#N/A	#N/A	up	3.83667e-09
Zjn_sc00005.1.g07040.1.sm.mkhc	#N/A	#N/A	#N/A	up	3.66838e-06
Zjn_sc00005.1.g07100.1.am.mk	PB.2331.1	MYB-related	TF	up	9.06205e-15
Zjn_sc00005.1.g07370.1.am.mkhc	#N/A	#N/A	#N/A	down	0.000159942
Zjn_sc00005.1.g07950.1.sm.mkhc	#N/A	#N/A	#N/A	up	2.95883e-11
Zjn_sc00005.1.g07980.1.am.mk	#N/A	#N/A	#N/A	down	3.67757e-16
Zjn_sc00005.1.g08040.1.am.mk	#N/A	#N/A	#N/A	up	2.08232e-05
Zjn_sc00005.1.g08320.1.sm.mkhc	Zjn_sc00005.1.g08320.1.sm.mkhc.mRNA	NAC	TF	up	1.77304e-13
Zjn_sc00005.1.g08440.1.am.mk	#N/A	#N/A	#N/A	down	1.56373e-05
Zjn_sc00005.1.g08450.1.am.mk	#N/A	#N/A	#N/A	down	8.17045e-05
Zjn_sc00005.1.g08520.1.am.mkhc	#N/A	#N/A	#N/A	up	5.02232e-08
Zjn_sc00005.1.g08620.1.sm.mkhc	#N/A	#N/A	#N/A	down	9.99776e-10
Zjn_sc00005.1.g08680.1.sm.mkhc	#N/A	#N/A	#N/A	up	9.07694e-20
Zjn_sc00005.1.g08750.1.es.mkhc	#N/A	#N/A	#N/A	up	3.99333e-09
Zjn_sc00005.1.g08930.1.am.mk	#N/A	#N/A	#N/A	up	1.32589e-06
Zjn_sc00005.1.g08940.1.sm.mkhc	#N/A	#N/A	#N/A	up	1.00968e-17
Zjn_sc00005.1.g08960.1.sm.mkhc	PB.2393.1	RLK-Pelle_LRR-XII-1	PK	up	1.05376e-10
Zjn_sc00005.1.g09270.1.sm.mkhc	#N/A	#N/A	#N/A	up	0.000820904
Zjn_sc00005.1.g09450.1.sm.mk	#N/A	#N/A	#N/A	down	1.32996e-12
Zjn_sc00005.1.g09530.1.am.mk	#N/A	#N/A	#N/A	up	0.00327288
Zjn_sc00006.1.g00070.1.sm.mkhc	#N/A	#N/A	#N/A	down	5.92911e-06
Zjn_sc00006.1.g00110.1.sm.mk	Zjn_sc00006.1.g00110.1.sm.mk.mRNA	AGC_RSK-2	PK	up	6.02934e-13
Zjn_sc00006.1.g00190.1.sm.mk	#N/A	#N/A	#N/A	up	0.00136107
Zjn_sc00006.1.g00280.1.sm.mkhc	#N/A	#N/A	#N/A	up	8.56031e-16
Zjn_sc00006.1.g00460.1.am.mkhc	#N/A	#N/A	#N/A	down	0.000481667
Zjn_sc00006.1.g00520.1.am.mk	#N/A	#N/A	#N/A	up	1.38285e-15
Zjn_sc00006.1.g00580.1.am.mk	#N/A	#N/A	#N/A	up	5.57266e-21
Zjn_sc00006.1.g00760.1.sm.mkhc	#N/A	#N/A	#N/A	down	2.98161e-19
Zjn_sc00006.1.g00890.1.sm.mk	#N/A	#N/A	#N/A	up	0.000469629
Zjn_sc00006.1.g01040.1.sm.mkhc	#N/A	#N/A	#N/A	down	3.78668e-11
Zjn_sc00006.1.g01050.1.am.mk	#N/A	#N/A	#N/A	down	2.48304e-05
Zjn_sc00006.1.g01090.1.sm.mkhc	#N/A	#N/A	#N/A	down	2.98758e-10
Zjn_sc00006.1.g01290.1.sm.mkhc	#N/A	#N/A	#N/A	down	0.00307238
Zjn_sc00006.1.g01500.1.am.mk	PB.2461.1	NAC	TF	up	0.000208677
Zjn_sc00006.1.g01560.1.sm.mk	#N/A	#N/A	#N/A	down	1.93566e-27
Zjn_sc00006.1.g01570.1.am.mk	#N/A	#N/A	#N/A	down	3.01529e-05
Zjn_sc00006.1.g01670.1.sm.mkhc	#N/A	#N/A	#N/A	down	5.77662e-16
Zjn_sc00006.1.g01730.1.am.mk	#N/A	#N/A	#N/A	down	0.00190979
Zjn_sc00006.1.g01760.1.sm.mk	#N/A	#N/A	#N/A	up	0.00787718
Zjn_sc00006.1.g01830.1.am.mk	#N/A	#N/A	#N/A	down	0.000891325
Zjn_sc00006.1.g01910.1.am.mk	#N/A	#N/A	#N/A	up	1.38109e-11
Zjn_sc00006.1.g01980.1.am.mk	#N/A	#N/A	#N/A	down	4.73518e-12
Zjn_sc00006.1.g02070.1.sm.mk	#N/A	#N/A	#N/A	down	1.41009e-05
Zjn_sc00006.1.g02080.1.sm.mk	#N/A	#N/A	#N/A	down	0.00230865
Zjn_sc00006.1.g02170.1.am.mkhc	#N/A	#N/A	#N/A	up	4.08482e-31
Zjn_sc00006.1.g02220.1.sm.mkhc	#N/A	#N/A	#N/A	down	0.000131113
Zjn_sc00006.1.g02360.1.am.mk	Zjn_sc00006.1.g02360.1.am.mk.mRNA	Trihelix	TF	up	8.31242e-06
Zjn_sc00006.1.g02730.1.am.mk	PB.2496.1	Others	TR	down	2.03383e-15
Zjn_sc00006.1.g02820.1.am.mk	#N/A	#N/A	#N/A	up	0.00201614
Zjn_sc00006.1.g02880.1.sm.mk	#N/A	#N/A	#N/A	down	6.92355e-05
Zjn_sc00006.1.g02960.1.sm.mkhc	PB.2502.1	NAC	TF	up	5.47987e-09
Zjn_sc00006.1.g02980.1.am.mk	#N/A	#N/A	#N/A	down	8.30553e-07
Zjn_sc00006.1.g03160.1.sm.mk	#N/A	#N/A	#N/A	down	8.76578e-09
Zjn_sc00006.1.g03270.1.sm.mkhc	#N/A	#N/A	#N/A	up	7.33102e-06
Zjn_sc00006.1.g03440.1.sm.mk	#N/A	#N/A	#N/A	down	2.79832e-06
Zjn_sc00006.1.g03940.1.am.mk	#N/A	#N/A	#N/A	down	3.03379e-07
Zjn_sc00006.1.g04110.1.am.mk	#N/A	#N/A	#N/A	down	0.00607152
Zjn_sc00006.1.g04130.1.sm.mkhc	#N/A	#N/A	#N/A	down	6.72188e-06
Zjn_sc00006.1.g04180.1.am.mk	#N/A	#N/A	#N/A	up	0.00187218
Zjn_sc00006.1.g04190.1.am.mk	#N/A	#N/A	#N/A	up	0.0072861
Zjn_sc00006.1.g04370.1.sm.mk	#N/A	#N/A	#N/A	down	0.000605619
Zjn_sc00006.1.g04380.1.sm.mkhc	#N/A	#N/A	#N/A	down	3.60753e-07
Zjn_sc00006.1.g04480.1.sm.mk	#N/A	#N/A	#N/A	down	1.76887e-08
Zjn_sc00006.1.g04600.1.sm.mkhc	#N/A	#N/A	#N/A	down	7.65714e-13
Zjn_sc00006.1.g04730.1.sm.mkhc	PB.2556.1	AP2/ERF-ERF	TF	up	8.12857e-07
Zjn_sc00006.1.g04820.1.am.mk	Zjn_sc00006.1.g04820.1.am.mk.mRNA	Others	TR	up	0.00422268
Zjn_sc00006.1.g05080.1.sm.mkhc	#N/A	#N/A	#N/A	up	4.80906e-08
Zjn_sc00006.1.g05360.1.am.mk	#N/A	#N/A	#N/A	down	0.00024297
Zjn_sc00006.1.g05940.1.am.mk	#N/A	#N/A	#N/A	down	0.00159151
Zjn_sc00006.1.g06120.1.sm.mkhc	#N/A	#N/A	#N/A	down	0.000660732
Zjn_sc00006.1.g06240.1.am.mk	#N/A	#N/A	#N/A	down	1.22516e-10
Zjn_sc00006.1.g06850.1.sm.mkhc	#N/A	#N/A	#N/A	up	5.20651e-11
Zjn_sc00006.1.g07210.1.sm.mk	PB.2612.1	bHLH	TF	down	1.96286e-07
Zjn_sc00007.1.g00060.1.sm.mkhc	PB.2640.1	bZIP	TF	down	0.00695966
Zjn_sc00007.1.g00270.1.sm.mkhc	#N/A	#N/A	#N/A	down	2.2356e-11
Zjn_sc00007.1.g00300.1.am.mk	#N/A	#N/A	#N/A	down	6.84945e-08
Zjn_sc00007.1.g00370.1.sm.mkhc	#N/A	#N/A	#N/A	down	0.00139548
Zjn_sc00007.1.g00490.1.sm.mkhc	#N/A	#N/A	#N/A	down	1.39649e-07
Zjn_sc00007.1.g00710.1.am.mk	Zjn_sc00007.1.g00710.1.am.mk.mRNA	RLK-Pelle_LysM	PK	up	0.00473292
Zjn_sc00007.1.g00790.1.sm.mkhc	#N/A	#N/A	#N/A	down	5.42873e-09
Zjn_sc00007.1.g00920.1.sm.mk	#N/A	#N/A	#N/A	up	2.66676e-14
Zjn_sc00007.1.g00975.1.br	#N/A	#N/A	#N/A	down	0.00329388
Zjn_sc00007.1.g01030.1.sm.mkhc	#N/A	#N/A	#N/A	down	1.38726e-09
Zjn_sc00007.1.g01110.1.sm.mkhc	#N/A	#N/A	#N/A	down	4.97042e-10
Zjn_sc00007.1.g01150.1.sm.mkhc	#N/A	#N/A	#N/A	up	5.38769e-11
Zjn_sc00007.1.g01220.1.am.mkhc	#N/A	#N/A	#N/A	up	0.00998546
Zjn_sc00007.1.g01280.1.sm.mkhc	#N/A	#N/A	#N/A	up	1.03597e-10
Zjn_sc00007.1.g01400.1.am.mk	PB.2696.4	NAC	TF	up	4.82012e-15
Zjn_sc00007.1.g01450.1.am.mkhc	#N/A	#N/A	#N/A	down	2.90468e-07
Zjn_sc00007.1.g01470.1.am.mk	PB.2698.3	CAMK_CDPK	PK	up	5.68289e-10
Zjn_sc00007.1.g01990.1.sm.mkhc	PB.2720.2	CMGC_Pl-Tthe	PK	up	6.7183e-05
Zjn_sc00007.1.g02020.1.sm.mk	#N/A	#N/A	#N/A	down	0.000119124
Zjn_sc00007.1.g02050.1.am.mk	PB.2723.1	bHLH	TF	down	0.000250674
Zjn_sc00007.1.g02190.1.sm.mkhc	#N/A	#N/A	#N/A	down	0.000726137
Zjn_sc00007.1.g02195.1.br	#N/A	#N/A	#N/A	down	1.05012e-05
Zjn_sc00007.1.g02260.1.sm.mkhc	#N/A	#N/A	#N/A	up	1.78504e-08
Zjn_sc00007.1.g02270.1.sm.mkhc	PB.2734.1	STE_STE20-Fray	PK	up	3.40056e-07
Zjn_sc00007.1.g02380.1.sm.mkhc	#N/A	#N/A	#N/A	up	4.0796e-09
Zjn_sc00007.1.g02470.1.am.mk	#N/A	#N/A	#N/A	up	0.000964429
Zjn_sc00007.1.g02660.1.sm.mkhc	#N/A	#N/A	#N/A	down	0.00135691
Zjn_sc00007.1.g02780.1.am.mk	#N/A	#N/A	#N/A	down	0.00225445
Zjn_sc00007.1.g02850.1.am.mk	#N/A	#N/A	#N/A	up	9.25334e-26
Zjn_sc00007.1.g02980.1.sm.mkhc	#N/A	#N/A	#N/A	up	7.9828e-12
Zjn_sc00007.1.g03040.1.am.mkhc	#N/A	#N/A	#N/A	up	0.00374084
Zjn_sc00007.1.g03270.1.sm.mk	#N/A	#N/A	#N/A	up	1.6969e-07
Zjn_sc00007.1.g03460.1.sm.mkhc	#N/A	#N/A	#N/A	up	2.14496e-07
Zjn_sc00007.1.g03570.1.sm.mkhc	#N/A	#N/A	#N/A	down	1.16162e-16
Zjn_sc00007.1.g03620.1.sm.mkhc	#N/A	#N/A	#N/A	up	5.36993e-06
Zjn_sc00007.1.g03820.1.sm.mk	Zjn_sc00007.1.g03820.1.sm.mk.mRNA	AP2/ERF-ERF	TF	down	6.43811e-05
Zjn_sc00007.1.g03840.1.sm.mkhc	#N/A	#N/A	#N/A	down	1.82959e-16
Zjn_sc00007.1.g04100.1.sm.mk	#N/A	#N/A	#N/A	down	5.89151e-13
Zjn_sc00007.1.g04220.1.sm.mkhc	#N/A	#N/A	#N/A	up	1.00094e-09
Zjn_sc00007.1.g04235.1.br	#N/A	#N/A	#N/A	up	3.89849e-06
Zjn_sc00007.1.g04300.1.am.mkhc	#N/A	#N/A	#N/A	down	1.93346e-06
Zjn_sc00007.1.g04620.1.am.mk	PB.2812.1	mTERF	TR	down	2.53363e-10
Zjn_sc00007.1.g04640.1.sm.mkhc	#N/A	#N/A	#N/A	up	8.30259e-07
Zjn_sc00007.1.g04670.1.am.mk	#N/A	#N/A	#N/A	up	1.52277e-05
Zjn_sc00007.1.g04680.1.cf.mkhc	#N/A	#N/A	#N/A	up	1.47152e-05
Zjn_sc00007.1.g04890.1.sm.mkhc	#N/A	#N/A	#N/A	up	0.000308444
Zjn_sc00007.1.g04920.1.sm.mkhc	#N/A	#N/A	#N/A	down	7.711e-15
Zjn_sc00007.1.g04940.1.sm.mkhc	#N/A	#N/A	#N/A	down	1.6942e-07
Zjn_sc00007.1.g05200.1.sm.mk	#N/A	#N/A	#N/A	up	5.74e-10
Zjn_sc00007.1.g05260.1.sm.mk	#N/A	#N/A	#N/A	up	5.36993e-06
Zjn_sc00007.1.g05270.1.sm.mk	#N/A	#N/A	#N/A	up	0.00274777
Zjn_sc00007.1.g05420.1.am.mk	#N/A	#N/A	#N/A	down	0.0048453
Zjn_sc00007.1.g05610.1.sm.mkhc	Zjn_sc00007.1.g05610.1.sm.mkhc.mRNA	mTERF	TR	down	3.30748e-10
Zjn_sc00007.1.g05670.1.sm.mkhc	#N/A	#N/A	#N/A	down	7.23323e-27
Zjn_sc00007.1.g05840.1.am.mk	#N/A	#N/A	#N/A	down	2.00831e-05
Zjn_sc00007.1.g05890.1.sm.mkhc	#N/A	#N/A	#N/A	down	3.4115e-06
Zjn_sc00007.1.g05900.1.am.mkhc	#N/A	#N/A	#N/A	up	3.11191e-09
Zjn_sc00007.1.g05950.1.sm.mkhc	#N/A	#N/A	#N/A	up	0.00152432
Zjn_sc00007.1.g05970.1.am.mk	#N/A	#N/A	#N/A	down	0.00181979
Zjn_sc00007.1.g06010.1.sm.mkhc	#N/A	#N/A	#N/A	up	0.00520765
Zjn_sc00007.1.g06040.1.am.mk	#N/A	#N/A	#N/A	down	3.88098e-07
Zjn_sc00007.1.g06060.1.sm.mk	#N/A	#N/A	#N/A	up	0.00145432
Zjn_sc00007.1.g06070.1.sm.mk	#N/A	#N/A	#N/A	up	2.98071e-12
Zjn_sc00007.1.g06100.1.sm.mkhc	#N/A	#N/A	#N/A	down	8.42323e-07
Zjn_sc00007.1.g06340.1.am.mkhc	PB.2875.1	Others	TR	up	1.86288e-07
Zjn_sc00007.1.g06430.1.am.mk	#N/A	#N/A	#N/A	up	1.67613e-11
Zjn_sc00007.1.g06450.1.sm.mkhc	#N/A	#N/A	#N/A	up	1.04449e-10
Zjn_sc00007.1.g06470.1.sm.mkhc	#N/A	#N/A	#N/A	up	5.08409e-07
Zjn_sc00007.1.g06520.1.am.mk	#N/A	#N/A	#N/A	down	0.00139318
Zjn_sc00007.1.g06560.1.sm.mk	#N/A	#N/A	#N/A	down	0.000684775
Zjn_sc00007.1.g06580.1.sm.mkhc	#N/A	#N/A	#N/A	up	1.15191e-09
Zjn_sc00007.1.g06610.1.am.mk	#N/A	#N/A	#N/A	up	2.26094e-13
Zjn_sc00007.1.g06650.1.sm.mk	#N/A	#N/A	#N/A	up	9.42931e-08
Zjn_sc00007.1.g06660.1.sm.mk	#N/A	#N/A	#N/A	up	1.2398e-06
Zjn_sc00007.1.g06670.1.am.mk	#N/A	#N/A	#N/A	up	6.46555e-06
Zjn_sc00007.1.g06720.1.am.mkhc	#N/A	#N/A	#N/A	up	4.63342e-13
Zjn_sc00007.1.g07080.1.am.mkhc	#N/A	#N/A	#N/A	down	1.03197e-11
Zjn_sc00007.1.g07190.1.sm.mk	Zjn_sc00007.1.g07190.1.sm.mk.mRNA	C2H2	TF	down	0.00295718
Zjn_sc00007.1.g07500.1.am.mkhc	#N/A	#N/A	#N/A	up	5.58431e-08
Zjn_sc00007.1.g07510.1.sm.mk	PB.2928.1	TUB	TF	down	0.000177475
Zjn_sc00007.1.g07600.1.sm.mk	#N/A	#N/A	#N/A	down	0.000559778
Zjn_sc00007.1.g07620.1.am.mkhc	#N/A	#N/A	#N/A	up	0.00106176
Zjn_sc00007.1.g07760.1.am.mkhc	PB.2938.1	CMGC_DYRK-YAK	PK	up	1.10165e-10
Zjn_sc00007.1.g07800.1.sm.mk	PB.2940.1	GRF	TF	up	1.59755e-06
Zjn_sc00007.1.g07850.1.am.mk	#N/A	#N/A	#N/A	down	8.99597e-05
Zjn_sc00007.1.g08010.1.sm.mk	#N/A	#N/A	#N/A	up	7.46608e-14
Zjn_sc00007.1.g08070.1.sm.mkhc	#N/A	#N/A	#N/A	down	3.43396e-07
Zjn_sc00007.1.g08110.1.am.mk	#N/A	#N/A	#N/A	down	9.14224e-08
Zjn_sc00007.1.g08270.1.sm.mkhc	#N/A	#N/A	#N/A	up	1.5762e-08
Zjn_sc00007.1.g08740.1.am.mk	#N/A	#N/A	#N/A	up	0.000216199
Zjn_sc00007.1.g08830.1.sm.mkhc	PB.2976.1	MYB-related	TF	up	3.06468e-07
Zjn_sc00007.1.g08850.1.sm.mk	#N/A	#N/A	#N/A	down	2.49101e-10
Zjn_sc00007.1.g08860.1.sm.mk	#N/A	#N/A	#N/A	down	0.000132475
Zjn_sc00007.1.g09170.1.sm.mk	#N/A	#N/A	#N/A	down	2.90056e-06
Zjn_sc00007.1.g09230.1.am.mk	Zjn_sc00007.1.g09230.1.am.mk.mRNA	AP2/ERF-ERF	TF	down	2.38802e-11
Zjn_sc00007.1.g09250.1.sm.mk	Zjn_sc00007.1.g09250.1.sm.mk.mRNA	AP2/ERF-ERF	TF	down	0.00467924
Zjn_sc00007.1.g09280.1.sm.mk	#N/A	#N/A	#N/A	up	1.50837e-18
Zjn_sc00007.1.g09290.1.am.mk	#N/A	#N/A	#N/A	up	0.000336441
Zjn_sc00007.1.g09300.1.sm.mkhc	#N/A	#N/A	#N/A	up	3.2272e-09
Zjn_sc00007.1.g09430.1.sm.mkhc	Zjn_sc00007.1.g09430.1.sm.mkhc.mRNA	C2C2-Dof	TF	up	4.78323e-11
Zjn_sc00007.1.g09600.1.sm.mk	#N/A	#N/A	#N/A	up	2.02259e-14
Zjn_sc00007.1.g09760.1.sm.mk	#N/A	#N/A	#N/A	down	6.46905e-06
Zjn_sc00007.1.g09830.1.sm.mk	#N/A	#N/A	#N/A	up	7.09226e-11
Zjn_sc00007.1.g10260.1.am.mk	#N/A	#N/A	#N/A	up	4.86264e-08
Zjn_sc00007.1.g10550.1.am.mk	#N/A	#N/A	#N/A	down	0.00422757
Zjn_sc00007.1.g10600.1.sm.mkhc	#N/A	#N/A	#N/A	down	3.47689e-05
Zjn_sc00007.1.g10690.1.sm.mkhc	#N/A	#N/A	#N/A	down	8.01162e-07
Zjn_sc00007.1.g10700.1.am.mk	#N/A	#N/A	#N/A	up	2.60595e-08
Zjn_sc00007.1.g10810.1.sm.mkhc	PB.3035.1	Trihelix	TF	up	1.54043e-12
Zjn_sc00007.1.g10850.1.am.mk	#N/A	#N/A	#N/A	down	3.86182e-07
Zjn_sc00007.1.g10930.1.am.mk	#N/A	#N/A	#N/A	up	9.69892e-07
Zjn_sc00007.1.g10940.1.am.mkhc	#N/A	#N/A	#N/A	up	1.21069e-13
Zjn_sc00007.1.g11050.1.sm.mkhc	#N/A	#N/A	#N/A	down	5.54651e-06
Zjn_sc00007.1.g11120.1.am.mk	#N/A	#N/A	#N/A	up	0.00119174
Zjn_sc00007.1.g11180.1.sm.mk	#N/A	#N/A	#N/A	up	2.30718e-09
Zjn_sc00007.1.g11230.1.am.mkhc	#N/A	#N/A	#N/A	up	2.54997e-08
Zjn_sc00007.1.g11360.1.sm.mkhc	#N/A	#N/A	#N/A	up	8.56131e-09
Zjn_sc00007.1.g11490.1.am.mk	#N/A	#N/A	#N/A	down	1.83147e-06
Zjn_sc00007.1.g11880.1.am.mk	#N/A	#N/A	#N/A	up	0.000377572
Zjn_sc00007.1.g11900.1.sm.mkhc	#N/A	#N/A	#N/A	up	1.40147e-07
Zjn_sc00007.1.g11910.1.sm.mkhc	#N/A	#N/A	#N/A	up	7.54859e-07
Zjn_sc00007.1.g12160.1.sm.mkhc	#N/A	#N/A	#N/A	up	4.26663e-06
Zjn_sc00008.1.g00040.1.am.mkhc	#N/A	#N/A	#N/A	down	0.000174341
Zjn_sc00008.1.g00170.1.sm.mkhc	#N/A	#N/A	#N/A	down	0.00249479
Zjn_sc00008.1.g00200.1.sm.mkhc	#N/A	#N/A	#N/A	down	1.65707e-18
Zjn_sc00008.1.g00260.1.sm.mk	#N/A	#N/A	#N/A	up	0.000274656
Zjn_sc00008.1.g00360.1.am.mk	Zjn_sc00008.1.g00360.1.am.mk.mRNA	NAC	TF	down	7.10407e-23
Zjn_sc00008.1.g00460.1.am.mk	Zjn_sc00008.1.g00460.1.am.mk.mRNA	bHLH	TF	up	0.000552309
Zjn_sc00008.1.g00520.1.am.mk	#N/A	#N/A	#N/A	up	1.15345e-08
Zjn_sc00008.1.g00680.1.am.mk	#N/A	#N/A	#N/A	down	2.5002e-08
Zjn_sc00008.1.g00690.1.sm.mkhc	#N/A	#N/A	#N/A	up	1.15495e-05
Zjn_sc00008.1.g00810.1.sm.mkhc	#N/A	#N/A	#N/A	up	1.29123e-14
Zjn_sc00008.1.g00860.1.am.mk	#N/A	#N/A	#N/A	up	0.000941858
Zjn_sc00008.1.g00870.1.am.mk	#N/A	#N/A	#N/A	up	7.30264e-12
Zjn_sc00008.1.g00880.1.am.mk	PB.3133.1	MADS-MIKC	TF	up	6.69732e-25
Zjn_sc00008.1.g00990.1.am.mk	#N/A	#N/A	#N/A	down	2.10498e-08
Zjn_sc00008.1.g01030.1.am.mk	#N/A	#N/A	#N/A	down	0.000111147
Zjn_sc00008.1.g01040.1.am.mkhc	#N/A	#N/A	#N/A	down	1.44873e-32
Zjn_sc00008.1.g01200.1.am.mk	#N/A	#N/A	#N/A	down	1.39094e-11
Zjn_sc00008.1.g01270.1.am.mk	#N/A	#N/A	#N/A	up	0.00533838
Zjn_sc00008.1.g01310.1.sm.mk	#N/A	#N/A	#N/A	up	0.00145121
Zjn_sc00008.1.g01320.1.am.mk	#N/A	#N/A	#N/A	up	0.00079412
Zjn_sc00008.1.g01410.1.am.mkhc	#N/A	#N/A	#N/A	up	1.81152e-09
Zjn_sc00008.1.g01440.1.sm.mk	#N/A	#N/A	#N/A	up	0.000194581
Zjn_sc00008.1.g01470.1.sm.mkhc	#N/A	#N/A	#N/A	down	3.69215e-12
Zjn_sc00008.1.g01590.1.sm.mkhc	#N/A	#N/A	#N/A	down	5.33991e-06
Zjn_sc00008.1.g01780.1.sm.mk	#N/A	#N/A	#N/A	down	0.0016325
Zjn_sc00008.1.g01800.1.sm.mk	#N/A	#N/A	#N/A	down	1.36405e-12
Zjn_sc00008.1.g01840.1.am.mk	Zjn_sc00008.1.g01840.1.am.mk.mRNA	CMGC_CDKL-Os	PK	up	1.08321e-08
Zjn_sc00008.1.g01930.1.sm.mkhc	PB.3182.1	RLK-Pelle_LRR-Xb-1	PK	up	1.20854e-05
Zjn_sc00008.1.g01950.1.am.mk	#N/A	#N/A	#N/A	down	1.06481e-08
Zjn_sc00008.1.g02030.1.sm.mkhc	#N/A	#N/A	#N/A	up	2.9898e-08
Zjn_sc00008.1.g02090.1.sm.mk	#N/A	#N/A	#N/A	down	0.000127771
Zjn_sc00008.1.g02190.1.am.mk	#N/A	#N/A	#N/A	up	2.9136e-06
Zjn_sc00008.1.g02210.1.am.mk	#N/A	#N/A	#N/A	up	1.11476e-18
Zjn_sc00008.1.g02250.1.am.mk	#N/A	#N/A	#N/A	down	1.19644e-14
Zjn_sc00008.1.g02260.1.am.mkhc	#N/A	#N/A	#N/A	up	1.3254e-08
Zjn_sc00008.1.g02680.1.sm.mkhc	#N/A	#N/A	#N/A	up	7.35799e-08
Zjn_sc00008.1.g02700.1.am.mkhc	Zjn_sc00008.1.g02700.1.am.mkhc.mRNA	NAC	TF	up	3.88978e-08
Zjn_sc00008.1.g02770.1.am.mk	#N/A	#N/A	#N/A	up	1.41681e-10
Zjn_sc00008.1.g02920.1.am.mkhc	PB.3218.1	GARP-G2-like	TF	up	3.59555e-12
Zjn_sc00008.1.g03230.1.sm.mkhc	PB.3226.1	RLK-Pelle_RLCK-VI	PK	up	9.01389e-11
Zjn_sc00008.1.g03380.1.sm.mkhc	PB.3230.1	RLK-Pelle_LRR-V	PK	up	4.62383e-06
Zjn_sc00008.1.g03750.1.am.mk	#N/A	#N/A	#N/A	down	0.000649984
Zjn_sc00008.1.g04100.1.am.mk	Zjn_sc00008.1.g04100.1.am.mk.mRNA	RLK-Pelle_RLCK-X	PK	down	8.99547e-17
Zjn_sc00008.1.g04160.1.sm.mk	#N/A	#N/A	#N/A	down	8.8521e-16
Zjn_sc00008.1.g04400.1.sm.mk	#N/A	#N/A	#N/A	down	2.50098e-18
Zjn_sc00008.1.g04410.1.am.mk	#N/A	#N/A	#N/A	down	0.00459564
Zjn_sc00008.1.g04530.1.sm.mkhc	PB.3278.1	C3H	TF	up	0.000192734
Zjn_sc00008.1.g04770.1.am.mk	#N/A	#N/A	#N/A	up	3.0846e-08
Zjn_sc00008.1.g04870.1.sm.mk	#N/A	#N/A	#N/A	up	3.4639e-12
Zjn_sc00008.1.g05220.1.am.mk	#N/A	#N/A	#N/A	up	1.24326e-05
Zjn_sc00008.1.g05540.1.am.mk	#N/A	#N/A	#N/A	down	7.3413e-15
Zjn_sc00008.1.g05610.1.sm.mk	#N/A	#N/A	#N/A	down	1.12924e-08
Zjn_sc00008.1.g05620.1.sm.mk	#N/A	#N/A	#N/A	down	0.000186343
Zjn_sc00008.1.g05820.1.sm.mk	#N/A	#N/A	#N/A	up	7.73272e-05
Zjn_sc00008.1.g05950.1.am.mk	#N/A	#N/A	#N/A	up	5.9854e-06
Zjn_sc00008.1.g05960.1.sm.mkhc	#N/A	#N/A	#N/A	up	1.19326e-11
Zjn_sc00008.1.g05970.1.am.mk	#N/A	#N/A	#N/A	up	1.39724e-05
Zjn_sc00008.1.g06130.1.sm.mkhc	#N/A	#N/A	#N/A	up	1.62319e-16
Zjn_sc00008.1.g06590.1.am.mk	#N/A	#N/A	#N/A	up	1.38323e-13
Zjn_sc00008.1.g06730.1.am.mk	#N/A	#N/A	#N/A	down	0.000354013
Zjn_sc00008.1.g06740.1.am.mk	Zjn_sc00008.1.g06740.1.am.mk.mRNA	C2C2-GATA	TF	down	9.33118e-16
Zjn_sc00008.1.g06750.1.am.mk	#N/A	#N/A	#N/A	down	4.52073e-05
Zjn_sc00008.1.g06800.1.am.mk	Zjn_sc00008.1.g06800.1.am.mk.mRNA	bHLH	TF	down	0.00813872
Zjn_sc00008.1.g06880.1.sm.mk	#N/A	#N/A	#N/A	down	0.00238966
Zjn_sc00008.1.g07010.1.sm.mkhc	#N/A	#N/A	#N/A	up	0.00097659
Zjn_sc00008.1.g07180.1.am.mk	Zjn_sc00008.1.g07180.1.am.mk.mRNA	NAC	TF	up	0.00519073
Zjn_sc00008.1.g07360.1.sm.mkhc	#N/A	#N/A	#N/A	up	2.12018e-06
Zjn_sc00008.1.g07410.1.am.mk	#N/A	#N/A	#N/A	up	3.90891e-06
Zjn_sc00008.1.g07470.1.sm.mkhc	PB.3376.2	BES1	TF	up	6.01751e-08
Zjn_sc00008.1.g07545.1.br	#N/A	#N/A	#N/A	up	5.7252e-22
Zjn_sc00008.1.g07740.1.am.mk	#N/A	#N/A	#N/A	up	1.11135e-13
Zjn_sc00008.1.g07820.1.sm.mkhc	#N/A	#N/A	#N/A	down	3.8135e-09
Zjn_sc00008.1.g08340.1.sm.mkhc	#N/A	#N/A	#N/A	up	4.68672e-10
Zjn_sc00008.1.g08490.1.sm.mk	#N/A	#N/A	#N/A	up	5.8154e-06
Zjn_sc00008.1.g08620.1.am.mk	#N/A	#N/A	#N/A	down	2.40291e-19
Zjn_sc00008.1.g08670.1.sm.mk	#N/A	#N/A	#N/A	up	1.43985e-07
Zjn_sc00008.1.g08790.1.am.mk	#N/A	#N/A	#N/A	up	0.00730433
Zjn_sc00008.1.g08900.1.sm.mkhc	#N/A	#N/A	#N/A	up	2.68979e-08
Zjn_sc00008.1.g08940.1.sm.mkhc	PB.3430.1	NAC	TF	up	3.97017e-05
Zjn_sc00008.1.g09100.1.sm.mkhc	#N/A	#N/A	#N/A	down	6.22742e-14
Zjn_sc00008.1.g09150.1.sm.mkhc	#N/A	#N/A	#N/A	up	8.25853e-07
Zjn_sc00008.1.g09600.1.am.mk	#N/A	#N/A	#N/A	up	3.28604e-08
Zjn_sc00008.1.g09610.1.sm.mk	#N/A	#N/A	#N/A	up	6.70669e-10
Zjn_sc00008.1.g09620.1.sm.mkhc	#N/A	#N/A	#N/A	down	1.85551e-07
Zjn_sc00008.1.g09730.1.sm.mk	#N/A	#N/A	#N/A	down	8.60109e-12
Zjn_sc00008.1.g09780.1.am.mk	#N/A	#N/A	#N/A	down	3.49938e-08
Zjn_sc00008.1.g09860.1.am.mk	#N/A	#N/A	#N/A	up	9.1633e-05
Zjn_sc00008.1.g09980.1.sm.mkhc	#N/A	#N/A	#N/A	up	8.49054e-07
Zjn_sc00008.1.g10020.1.sm.mkhc	#N/A	#N/A	#N/A	down	2.10978e-08
Zjn_sc00008.1.g10080.1.am.mk	#N/A	#N/A	#N/A	down	1.0452e-07
Zjn_sc00008.1.g10280.1.am.mkhc	#N/A	#N/A	#N/A	up	3.91756e-08
Zjn_sc00008.1.g10380.1.am.mk	#N/A	#N/A	#N/A	down	2.05312e-06
Zjn_sc00008.1.g10470.1.sm.mkhc	#N/A	#N/A	#N/A	up	1.10106e-05
Zjn_sc00008.1.g10520.1.am.mk	#N/A	#N/A	#N/A	down	3.2617e-10
Zjn_sc00008.1.g10600.1.sm.mkhc	#N/A	#N/A	#N/A	down	0.000415661
Zjn_sc00008.1.g10720.1.sm.mk	#N/A	#N/A	#N/A	down	1.35436e-09
Zjn_sc00008.1.g10790.1.am.mk	PB.3515.1	NAC	TF	down	3.79584e-05
Zjn_sc00008.1.g10820.1.sm.mkhc	#N/A	#N/A	#N/A	up	5.40701e-07
Zjn_sc00008.1.g10860.1.sm.mk	#N/A	#N/A	#N/A	down	6.86185e-09
Zjn_sc00008.1.g11180.1.am.mk	#N/A	#N/A	#N/A	down	6.47897e-12
Zjn_sc00008.1.g11230.1.am.mk	#N/A	#N/A	#N/A	up	0.0088652
Zjn_sc00008.1.g11270.1.sm.mkhc	#N/A	#N/A	#N/A	down	4.08369e-09
Zjn_sc00008.1.g11290.1.am.mk	Zjn_sc00008.1.g11290.1.am.mk.mRNA	MYB-related	TF	up	6.66261e-08
Zjn_sc00008.1.g11390.1.sm.mkhc	#N/A	#N/A	#N/A	up	1.88552e-20
Zjn_sc00008.1.g11690.1.am.mk	#N/A	#N/A	#N/A	down	5.59257e-11
Zjn_sc00008.1.g11730.1.am.mk	#N/A	#N/A	#N/A	down	0.000235446
Zjn_sc00008.1.g11780.1.am.mk	PB.3556.1	RLK-Pelle_DLSV	PK	down	4.59807e-08
Zjn_sc00008.1.g11790.1.am.mk	Zjn_sc00008.1.g11790.1.am.mk.mRNA	RLK-Pelle_DLSV	PK	down	0.000114482
Zjn_sc00008.1.g11990.1.sm.mkhc	#N/A	#N/A	#N/A	down	8.14023e-15
Zjn_sc00008.1.g12030.1.am.mkhc	#N/A	#N/A	#N/A	down	2.2326e-05
Zjn_sc00008.1.g12050.1.sm.mkhc	#N/A	#N/A	#N/A	down	1.09821e-05
Zjn_sc00009.1.g00260.1.am.mk	PB.3576.1	WRKY	TF	up	4.42855e-18
Zjn_sc00009.1.g00500.1.am.mk	#N/A	#N/A	#N/A	down	2.3628e-08
Zjn_sc00009.1.g00630.1.am.mkhc	#N/A	#N/A	#N/A	up	1.86834e-09
Zjn_sc00009.1.g00670.1.sm.mkhc	#N/A	#N/A	#N/A	up	7.10956e-09
Zjn_sc00009.1.g00820.1.am.mk	#N/A	#N/A	#N/A	down	1.30471e-05
Zjn_sc00009.1.g00870.1.sm.mk	#N/A	#N/A	#N/A	down	0.0039436
Zjn_sc00009.1.g00890.1.sm.mkhc	#N/A	#N/A	#N/A	down	0.000140964
Zjn_sc00009.1.g00920.1.sm.mk	PB.3602.19	Others	TR	down	0.00126513
Zjn_sc00009.1.g00960.1.am.mkhc	PB.3604.1	SNF2	TR	up	2.00844e-06
Zjn_sc00009.1.g01130.1.sm.mkhc	#N/A	#N/A	#N/A	down	1.14688e-09
Zjn_sc00009.1.g01140.1.am.mkhc	#N/A	#N/A	#N/A	down	1.83448e-05
Zjn_sc00009.1.g01300.1.sm.mkhc	#N/A	#N/A	#N/A	up	1.1155e-09
Zjn_sc00009.1.g01430.1.sm.mkhc	#N/A	#N/A	#N/A	down	4.17686e-12
Zjn_sc00009.1.g01560.1.sm.mk	#N/A	#N/A	#N/A	down	0.000184917
Zjn_sc00009.1.g01610.1.sm.mkhc	#N/A	#N/A	#N/A	up	4.69744e-07
Zjn_sc00009.1.g01700.1.am.mk	#N/A	#N/A	#N/A	up	2.39907e-05
Zjn_sc00009.1.g01950.1.am.mk	#N/A	#N/A	#N/A	up	1.70416e-05
Zjn_sc00009.1.g02040.1.es.mkhc	#N/A	#N/A	#N/A	down	2.96656e-06
Zjn_sc00009.1.g02070.1.am.mkhc	PB.3650.1	CMGC_CDK-CRK7-CDK9	PK	up	2.09021e-09
Zjn_sc00009.1.g02080.1.sm.mkhc	#N/A	#N/A	#N/A	up	3.21234e-11
Zjn_sc00009.1.g02110.1.sm.mkhc	PB.3652.1	NAC	TF	up	2.9142e-12
Zjn_sc00009.1.g02120.1.am.mk	#N/A	#N/A	#N/A	up	0.0070808
Zjn_sc00009.1.g02150.1.am.mk	#N/A	#N/A	#N/A	down	4.31939e-06
Zjn_sc00009.1.g02250.1.sm.mk	#N/A	#N/A	#N/A	down	0.000151569
Zjn_sc00009.1.g02260.1.sm.mkhc	#N/A	#N/A	#N/A	down	9.72198e-09
Zjn_sc00009.1.g02340.1.am.mk	#N/A	#N/A	#N/A	down	0.00810747
Zjn_sc00009.1.g02400.1.sm.mkhc	#N/A	#N/A	#N/A	down	0.00013135
Zjn_sc00009.1.g02540.1.am.mk	#N/A	#N/A	#N/A	up	1.25939e-11
Zjn_sc00009.1.g02560.1.am.mk	#N/A	#N/A	#N/A	up	1.13417e-10
Zjn_sc00009.1.g02860.1.am.mkhc	#N/A	#N/A	#N/A	down	3.65289e-06
Zjn_sc00009.1.g03100.1.sm.mk	#N/A	#N/A	#N/A	down	0.00330225
Zjn_sc00009.1.g03120.1.sm.mkhc	#N/A	#N/A	#N/A	down	6.31285e-14
Zjn_sc00009.1.g03130.1.sm.mkhc	#N/A	#N/A	#N/A	down	8.90912e-12
Zjn_sc00009.1.g03210.1.am.mk	#N/A	#N/A	#N/A	down	3.05639e-07
Zjn_sc00009.1.g03290.1.sm.mkhc	#N/A	#N/A	#N/A	up	0.000124482
Zjn_sc00009.1.g03320.1.sm.mkhc	PB.3701.1	TAZ	TR	up	0.00444294
Zjn_sc00009.1.g03430.1.sm.mkhc	#N/A	#N/A	#N/A	up	7.9867e-15
Zjn_sc00009.1.g03530.1.sm.mk	#N/A	#N/A	#N/A	up	7.64355e-05
Zjn_sc00009.1.g03820.1.sm.mkhc	#N/A	#N/A	#N/A	down	0.000102249
Zjn_sc00009.1.g03910.1.sm.mkhc	#N/A	#N/A	#N/A	down	0.00715821
Zjn_sc00009.1.g04030.1.am.mk	#N/A	#N/A	#N/A	up	2.85139e-28
Zjn_sc00009.1.g04160.1.sm.mkhc	#N/A	#N/A	#N/A	up	3.55587e-10
Zjn_sc00009.1.g04230.1.am.mk	Zjn_sc00009.1.g04230.1.am.mk.mRNA	AP2/ERF-ERF	TF	down	2.41898e-09
Zjn_sc00009.1.g04270.1.sm.mkhc	#N/A	#N/A	#N/A	down	7.24438e-10
Zjn_sc00009.1.g04550.1.am.mkhc	#N/A	#N/A	#N/A	up	0.000266247
Zjn_sc00009.1.g04580.1.am.mkhc	#N/A	#N/A	#N/A	up	2.61491e-08
Zjn_sc00009.1.g04630.1.sm.mk	#N/A	#N/A	#N/A	up	1.76844e-06
Zjn_sc00009.1.g04640.1.sm.mkhc	#N/A	#N/A	#N/A	up	0.000537825
Zjn_sc00009.1.g04680.1.cf.mkhc	PB.3761.1	RLK-Pelle_LRR-XI-1	PK	down	1.59621e-07
Zjn_sc00009.1.g04980.1.sm.mkhc	Zjn_sc00009.1.g04980.1.sm.mkhc.mRNA	MYB	TF	up	6.72824e-11
Zjn_sc00009.1.g05080.1.sm.mk	#N/A	#N/A	#N/A	up	1.44843e-06
Zjn_sc00009.1.g05120.1.am.mk	#N/A	#N/A	#N/A	up	2.35477e-13
Zjn_sc00009.1.g05190.1.sm.mkhc	#N/A	#N/A	#N/A	down	2.44394e-12
Zjn_sc00009.1.g05350.1.sm.mkhc	#N/A	#N/A	#N/A	down	0.0092649
Zjn_sc00009.1.g05360.1.sm.mkhc	#N/A	#N/A	#N/A	down	6.13147e-23
Zjn_sc00009.1.g05630.1.sm.mk	#N/A	#N/A	#N/A	down	0.000152174
Zjn_sc00009.1.g05640.1.am.mkhc	#N/A	#N/A	#N/A	up	9.07198e-17
Zjn_sc00009.1.g05670.1.am.mk	#N/A	#N/A	#N/A	up	0.000203814
Zjn_sc00009.1.g05680.1.cf.mkhc	#N/A	#N/A	#N/A	up	2.00895e-24
Zjn_sc00009.1.g05770.1.am.mk	PB.3800.1	bZIP	TF	up	0.00648753
Zjn_sc00009.1.g05970.1.sm.mk	#N/A	#N/A	#N/A	down	9.1633e-05
Zjn_sc00009.1.g06110.1.am.mk	#N/A	#N/A	#N/A	up	3.36649e-10
Zjn_sc00009.1.g06140.1.sm.mkhc	#N/A	#N/A	#N/A	up	1.27785e-05
Zjn_sc00009.1.g06240.1.am.mk	#N/A	#N/A	#N/A	down	0.000312063
Zjn_sc00009.1.g06340.1.sm.mkhc	#N/A	#N/A	#N/A	up	2.61552e-05
Zjn_sc00009.1.g06460.1.sm.mkhc	#N/A	#N/A	#N/A	down	1.3385e-10
Zjn_sc00009.1.g06470.1.sm.mkhc	#N/A	#N/A	#N/A	down	3.29217e-06
Zjn_sc00009.1.g06480.1.sm.mkhc	#N/A	#N/A	#N/A	down	2.49187e-16
Zjn_sc00009.1.g06560.1.am.mk	#N/A	#N/A	#N/A	up	9.59077e-07
Zjn_sc00009.1.g06640.1.sm.mkhc	#N/A	#N/A	#N/A	up	8.83442e-14
Zjn_sc00009.1.g06820.1.am.mk	#N/A	#N/A	#N/A	down	2.97341e-08
Zjn_sc00009.1.g06940.1.am.mk	#N/A	#N/A	#N/A	down	0.00104341
Zjn_sc00009.1.g07010.1.am.mk	PB.3844.1	WRKY	TF	down	6.43717e-15
Zjn_sc00009.1.g07180.1.sm.mk	Zjn_sc00009.1.g07180.1.sm.mk.mRNA	C2H2	TF	up	1.14123e-16
Zjn_sc00009.1.g07210.1.sm.mk	Zjn_sc00009.1.g07210.1.sm.mk.mRNA	C2H2	TF	up	3.97204e-19
Zjn_sc00009.1.g07360.1.sm.mkhc	#N/A	#N/A	#N/A	up	1.98774e-08
Zjn_sc00009.1.g07400.1.am.mk	#N/A	#N/A	#N/A	up	3.67745e-05
Zjn_sc00009.1.g07430.1.am.mk	Zjn_sc00009.1.g07430.1.am.mk.mRNA	Others	TR	up	2.60503e-08
Zjn_sc00009.1.g07450.1.sm.mkhc	#N/A	#N/A	#N/A	down	8.7901e-06
Zjn_sc00009.1.g07580.1.am.mk	#N/A	#N/A	#N/A	down	3.3705e-07
Zjn_sc00009.1.g07600.1.sm.mkhc	#N/A	#N/A	#N/A	up	1.09889e-14
Zjn_sc00009.1.g07810.1.am.mkhc	#N/A	#N/A	#N/A	down	3.95613e-06
Zjn_sc00009.1.g08100.1.sm.mkhc	#N/A	#N/A	#N/A	down	2.02117e-08
Zjn_sc00009.1.g08130.1.am.mk	#N/A	#N/A	#N/A	up	2.25513e-06
Zjn_sc00009.1.g08180.1.sm.mkhc	PB.3881.1	RLK-Pelle_RLCK-II	PK	up	3.59713e-07
Zjn_sc00009.1.g08440.1.am.mkhc	PB.3890.1	RLK-Pelle_LRR-VIII-1	PK	up	1.0657e-13
Zjn_sc00009.1.g08450.1.sm.mkhc	PB.3891.1	HB-WOX	TF	up	5.78562e-17
Zjn_sc00009.1.g08500.1.sm.mk	#N/A	#N/A	#N/A	down	5.97953e-18
Zjn_sc00009.1.g08600.1.sm.mkhc	PB.3897.1	RLK-Pelle_LRR-VIII-1	PK	up	6.12205e-22
Zjn_sc00009.1.g08730.1.sm.mkhc	#N/A	#N/A	#N/A	up	0.00418119
Zjn_sc00009.1.g08780.1.sm.mkhc	#N/A	#N/A	#N/A	up	1.18371e-07
Zjn_sc00009.1.g08800.1.sm.mk	#N/A	#N/A	#N/A	down	4.06592e-06
Zjn_sc00009.1.g08830.1.am.mk	#N/A	#N/A	#N/A	down	8.79724e-06
Zjn_sc00009.1.g08950.1.sm.mk	#N/A	#N/A	#N/A	up	0.00531677
Zjn_sc00009.1.g09120.1.am.mk	#N/A	#N/A	#N/A	up	0.000271041
Zjn_sc00009.1.g09220.1.am.mk	#N/A	#N/A	#N/A	down	1.68398e-05
Zjn_sc00009.1.g09230.1.sm.mk	#N/A	#N/A	#N/A	down	1.62987e-14
Zjn_sc00009.1.g09240.1.sm.mkhc	#N/A	#N/A	#N/A	up	1.87205e-11
Zjn_sc00009.1.g09380.1.sm.mkhc	#N/A	#N/A	#N/A	up	1.03501e-06
Zjn_sc00009.1.g09600.1.am.mk	#N/A	#N/A	#N/A	down	1.20323e-05
Zjn_sc00009.1.g09880.1.sm.mk	#N/A	#N/A	#N/A	up	5.56636e-17
Zjn_sc00009.1.g09920.1.am.mkhc	#N/A	#N/A	#N/A	up	4.76405e-09
Zjn_sc00009.1.g09960.1.sm.mkhc	Zjn_sc00009.1.g09960.1.sm.mkhc.mRNA	ULT	TF	up	5.3141e-06
Zjn_sc00009.1.g10110.1.sm.mkhc	#N/A	#N/A	#N/A	down	2.71453e-06
Zjn_sc00009.1.g10120.1.am.mkhc	#N/A	#N/A	#N/A	up	9.58353e-12
Zjn_sc00009.1.g10210.1.sm.mk	#N/A	#N/A	#N/A	down	1.49948e-05
Zjn_sc00009.1.g10340.1.sm.mk	#N/A	#N/A	#N/A	down	6.56728e-14
Zjn_sc00009.1.g10440.1.sm.mkhc	#N/A	#N/A	#N/A	up	2.07463e-13
Zjn_sc00009.1.g10750.1.sm.mkhc	#N/A	#N/A	#N/A	down	0.000902004
Zjn_sc00009.1.g10880.1.am.mk	#N/A	#N/A	#N/A	up	1.46206e-22
Zjn_sc00009.1.g10930.1.am.mkhc	#N/A	#N/A	#N/A	down	1.43926e-10
Zjn_sc00009.1.g11000.1.am.mkhc	#N/A	#N/A	#N/A	up	1.16481e-14
Zjn_sc00009.1.g11130.1.am.mk	#N/A	#N/A	#N/A	down	5.87656e-07
Zjn_sc00009.1.g11230.1.sm.mkhc	#N/A	#N/A	#N/A	up	6.83767e-12
Zjn_sc00009.1.g11310.1.sm.mkhc	#N/A	#N/A	#N/A	up	1.4323e-08
Zjn_sc00009.1.g11430.1.am.mk	#N/A	#N/A	#N/A	down	0.00525754
Zjn_sc00009.1.g11450.1.sm.mkhc	#N/A	#N/A	#N/A	down	7.34908e-06
Zjn_sc00009.1.g11740.1.am.mkhc	PB.3996.1	B3-ARF	TF	down	5.25574e-08
Zjn_sc00009.1.g12000.1.am.mk	#N/A	#N/A	#N/A	down	0.00805262
Zjn_sc00009.1.g12030.1.sm.mkhc	#N/A	#N/A	#N/A	up	0.000918748
Zjn_sc00010.1.g00250.1.sm.mkhc	#N/A	#N/A	#N/A	up	2.25501e-10
Zjn_sc00010.1.g00280.1.sm.mk	#N/A	#N/A	#N/A	up	2.7234e-11
Zjn_sc00010.1.g00970.1.am.mk	#N/A	#N/A	#N/A	down	1.49621e-08
Zjn_sc00010.1.g00990.1.sm.mk	#N/A	#N/A	#N/A	down	7.95532e-07
Zjn_sc00010.1.g01020.1.sm.mkhc	#N/A	#N/A	#N/A	up	1.30731e-07
Zjn_sc00010.1.g01150.1.am.mk	#N/A	#N/A	#N/A	down	0.00013509
Zjn_sc00010.1.g01330.1.sm.mk	#N/A	#N/A	#N/A	up	8.86316e-11
Zjn_sc00010.1.g01340.1.sm.mk	#N/A	#N/A	#N/A	up	0.00745245
Zjn_sc00010.1.g01410.1.am.mk	PB.4043.1	NF-YB	TF	down	8.24875e-12
Zjn_sc00010.1.g01430.1.sm.mk	#N/A	#N/A	#N/A	down	0.00023398
Zjn_sc00010.1.g01650.1.am.mkhc	#N/A	#N/A	#N/A	up	1.08297e-09
Zjn_sc00010.1.g01660.1.sm.mkhc	#N/A	#N/A	#N/A	up	0.00393392
Zjn_sc00010.1.g01930.1.sm.mkhc	#N/A	#N/A	#N/A	down	0.00114906
Zjn_sc00010.1.g02000.1.am.mkhc	#N/A	#N/A	#N/A	up	1.89171e-08
Zjn_sc00010.1.g02420.1.am.mk	#N/A	#N/A	#N/A	down	0.00216146
Zjn_sc00010.1.g02480.1.am.mk	Zjn_sc00010.1.g02480.1.am.mk.mRNA	zf-HD	TF	up	1.95329e-07
Zjn_sc00010.1.g03020.1.am.mk	#N/A	#N/A	#N/A	up	0.000386941
Zjn_sc00010.1.g03670.1.am.mk	Zjn_sc00010.1.g03670.1.am.mk.mRNA	CMGC_CDKL-Os	PK	up	0.00109081
Zjn_sc00010.1.g03690.1.am.mk	#N/A	#N/A	#N/A	up	0.000707043
Zjn_sc00010.1.g03780.1.sm.mk	#N/A	#N/A	#N/A	up	0.0017408
Zjn_sc00010.1.g04060.1.sm.mkhc	#N/A	#N/A	#N/A	up	9.65136e-11
Zjn_sc00010.1.g04170.1.sm.mkhc	#N/A	#N/A	#N/A	up	1.40439e-10
Zjn_sc00010.1.g04290.1.sm.mkhc	#N/A	#N/A	#N/A	down	6.14243e-14
Zjn_sc00010.1.g04310.1.am.mk	#N/A	#N/A	#N/A	down	5.64629e-11
Zjn_sc00010.1.g04320.1.am.mk	#N/A	#N/A	#N/A	down	5.24794e-09
Zjn_sc00010.1.g04340.1.am.mk	#N/A	#N/A	#N/A	down	2.9396e-07
Zjn_sc00010.1.g04840.1.sm.mkhc	#N/A	#N/A	#N/A	up	0.000641027
Zjn_sc00011.1.g00030.1.sm.mk	#N/A	#N/A	#N/A	down	2.97521e-05
Zjn_sc00011.1.g00150.1.sm.mkhc	#N/A	#N/A	#N/A	up	1.16212e-08
Zjn_sc00011.1.g00570.1.sm.mk	#N/A	#N/A	#N/A	down	6.93661e-05
Zjn_sc00011.1.g00760.1.am.mk	#N/A	#N/A	#N/A	up	8.12842e-05
Zjn_sc00011.1.g00780.1.sm.mkhc	#N/A	#N/A	#N/A	up	0.00292517
Zjn_sc00011.1.g00880.1.am.mk	PB.4169.1	STE_STE11	PK	down	0.000941858
Zjn_sc00011.1.g00890.1.sm.mkhc	#N/A	#N/A	#N/A	up	2.77876e-07
Zjn_sc00011.1.g00950.1.sm.mk	#N/A	#N/A	#N/A	up	1.3385e-10
Zjn_sc00011.1.g01010.1.sm.mk	#N/A	#N/A	#N/A	down	0.000106997
Zjn_sc00011.1.g01060.1.sm.mk	#N/A	#N/A	#N/A	down	1.66881e-11
Zjn_sc00011.1.g01160.1.sm.mkhc	#N/A	#N/A	#N/A	down	1.24508e-11
Zjn_sc00011.1.g01170.1.es.mkhc	#N/A	#N/A	#N/A	down	4.69265e-05
Zjn_sc00011.1.g01220.1.am.mk	#N/A	#N/A	#N/A	up	0.00226147
Zjn_sc00011.1.g01440.1.sm.mkhc	PB.4187.2	RLK-Pelle_Extensin	PK	up	0.00238123
Zjn_sc00011.1.g01580.1.am.mk	#N/A	#N/A	#N/A	up	5.71852e-06
Zjn_sc00011.1.g01840.1.am.mkhc	#N/A	#N/A	#N/A	up	3.5383e-05
Zjn_sc00011.1.g01890.1.sm.mk	#N/A	#N/A	#N/A	up	0.000245517
Zjn_sc00011.1.g01920.1.sm.mkhc	#N/A	#N/A	#N/A	down	1.11335e-10
Zjn_sc00011.1.g01990.1.sm.mkhc	#N/A	#N/A	#N/A	down	4.21565e-07
Zjn_sc00011.1.g02110.1.am.mk	#N/A	#N/A	#N/A	up	1.24015e-09
Zjn_sc00011.1.g02130.1.am.mk	Zjn_sc00011.1.g02130.1.am.mk.mRNA	MADS-MIKC	TF	up	0.00027186
Zjn_sc00011.1.g02160.1.am.mk	#N/A	#N/A	#N/A	up	0.00146936
Zjn_sc00011.1.g02170.1.am.mk	#N/A	#N/A	#N/A	up	1.0997e-06
Zjn_sc00011.1.g02180.1.am.mk	#N/A	#N/A	#N/A	up	4.54177e-22
Zjn_sc00011.1.g02190.1.am.mk	#N/A	#N/A	#N/A	up	8.42836e-15
Zjn_sc00011.1.g02280.1.sm.mkhc	#N/A	#N/A	#N/A	up	1.14215e-09
Zjn_sc00011.1.g02350.1.sm.mkhc	Zjn_sc00011.1.g02350.1.sm.mkhc.mRNA	WRKY	TF	up	8.15136e-20
Zjn_sc00011.1.g02410.1.sm.mkhc	#N/A	#N/A	#N/A	down	9.78048e-05
Zjn_sc00011.1.g02490.1.sm.mk	Zjn_sc00011.1.g02490.1.sm.mk.mRNA	HSF	TF	down	5.99984e-05
Zjn_sc00011.1.g02510.1.sm.mkhc	#N/A	#N/A	#N/A	down	5.1901e-16
Zjn_sc00011.1.g02610.1.am.mk	#N/A	#N/A	#N/A	down	1.42155e-05
Zjn_sc00011.1.g02640.1.sm.mk	#N/A	#N/A	#N/A	up	1.14974e-05
Zjn_sc00011.1.g02660.1.am.mk	#N/A	#N/A	#N/A	down	6.69059e-10
Zjn_sc00011.1.g02730.1.sm.mk	#N/A	#N/A	#N/A	up	2.3628e-08
Zjn_sc00011.1.g02740.1.sm.mkhc	#N/A	#N/A	#N/A	up	3.58846e-05
Zjn_sc00011.1.g02850.1.sm.mkhc	#N/A	#N/A	#N/A	up	2.48302e-14
Zjn_sc00011.1.g03140.1.am.mk	#N/A	#N/A	#N/A	up	1.05496e-17
Zjn_sc00011.1.g03210.1.sm.mkhc	#N/A	#N/A	#N/A	down	2.57201e-10
Zjn_sc00011.1.g03230.1.am.mk	PB.4260.3	TKL-Pl-4	PK	up	3.80975e-09
Zjn_sc00011.1.g03340.1.sm.mkhc	#N/A	#N/A	#N/A	down	4.08382e-11
Zjn_sc00011.1.g03840.1.am.mk	#N/A	#N/A	#N/A	down	3.86906e-11
Zjn_sc00011.1.g03920.1.am.mkhc	PB.4276.1	RLK-Pelle_WAK_LRK10L-1	PK	down	1.09618e-05
Zjn_sc00011.1.g03990.1.sm.mkhc	PB.4277.1	RLK-Pelle_LRK10L-2	PK	up	5.85558e-18
Zjn_sc00011.1.g04050.1.am.mk	#N/A	#N/A	#N/A	up	0.000228581
Zjn_sc00011.1.g04240.1.sm.mkhc	#N/A	#N/A	#N/A	down	0.00615097
Zjn_sc00011.1.g04300.1.sm.mkhc	#N/A	#N/A	#N/A	down	2.53988e-05
Zjn_sc00011.1.g04330.1.sm.mkhc	#N/A	#N/A	#N/A	down	0.000219888
Zjn_sc00011.1.g04490.1.am.mk	#N/A	#N/A	#N/A	up	1.35872e-13
Zjn_sc00011.1.g04520.1.sm.mk	#N/A	#N/A	#N/A	up	9.77391e-08
Zjn_sc00011.1.g04750.1.am.mk	Zjn_sc00011.1.g04750.1.am.mk.mRNA	MYB-related	TF	down	0.00158055
Zjn_sc00011.1.g04920.1.am.mk	PB.4307.1	bHLH	TF	up	1.17041e-07
Zjn_sc00011.1.g04970.1.sm.mk	#N/A	#N/A	#N/A	up	9.58036e-28
Zjn_sc00011.1.g05000.1.sm.mkhc	#N/A	#N/A	#N/A	down	6.04278e-07
Zjn_sc00011.1.g05010.1.am.mk	#N/A	#N/A	#N/A	up	3.08083e-06
Zjn_sc00011.1.g05190.1.am.mkhc	#N/A	#N/A	#N/A	up	4.61484e-17
Zjn_sc00011.1.g05300.1.am.mk	#N/A	#N/A	#N/A	down	0.000102506
Zjn_sc00011.1.g05490.1.sm.mk	#N/A	#N/A	#N/A	down	4.70077e-10
Zjn_sc00011.1.g05610.1.am.mk	#N/A	#N/A	#N/A	down	0.0072935
Zjn_sc00011.1.g05620.1.am.mk	#N/A	#N/A	#N/A	down	4.44354e-12
Zjn_sc00011.1.g05880.1.am.mk	#N/A	#N/A	#N/A	down	1.97993e-05
Zjn_sc00011.1.g05900.1.am.mk	#N/A	#N/A	#N/A	up	4.95918e-08
Zjn_sc00011.1.g05910.1.sm.mkhc	#N/A	#N/A	#N/A	up	1.41139e-05
Zjn_sc00011.1.g06260.1.am.mk	#N/A	#N/A	#N/A	up	3.79006e-06
Zjn_sc00011.1.g06400.1.sm.mk	#N/A	#N/A	#N/A	up	6.07492e-10
Zjn_sc00011.1.g06760.1.sm.mkhc	Zjn_sc00011.1.g06760.1.sm.mkhc.mRNA	WRKY	TF	up	0.0042665
Zjn_sc00011.1.g06830.1.sm.mkhc	#N/A	#N/A	#N/A	down	2.3628e-08
Zjn_sc00011.1.g06990.1.am.mk	#N/A	#N/A	#N/A	down	0.0033171
Zjn_sc00011.1.g07050.1.am.mk	#N/A	#N/A	#N/A	up	3.11982e-07
Zjn_sc00011.1.g07150.1.sm.mkhc	#N/A	#N/A	#N/A	up	3.64921e-09
Zjn_sc00011.1.g07330.1.sm.mk	#N/A	#N/A	#N/A	down	0.000299209
Zjn_sc00011.1.g07360.1.am.mkhc	PB.4384.1	MYB-related	TF	up	8.04629e-07
Zjn_sc00011.1.g07760.1.am.mk	#N/A	#N/A	#N/A	up	2.56867e-15
Zjn_sc00011.1.g07780.1.sm.mkhc	#N/A	#N/A	#N/A	up	1.19933e-06
Zjn_sc00011.1.g07790.1.sm.mkhc	#N/A	#N/A	#N/A	up	0.00133586
Zjn_sc00011.1.g08000.1.am.mk	PB.4396.1	LOB	TF	up	9.6552e-08
Zjn_sc00011.1.g08070.1.cf.mkhc	#N/A	#N/A	#N/A	up	4.18026e-12
Zjn_sc00011.1.g08140.1.am.mk	Zjn_sc00011.1.g08140.1.am.mk.mRNA	bHLH	TF	down	1.49836e-06
Zjn_sc00011.1.g08260.1.cf-es.mkhc	Zjn_sc00011.1.g08260.1.cf-es.mkhc.mRNA	RLK-Pelle_WAK	PK	up	0.000668647
Zjn_sc00011.1.g08430.1.sm.mkhc	#N/A	#N/A	#N/A	up	0.00747739
Zjn_sc00011.1.g08740.1.am.mk	#N/A	#N/A	#N/A	up	3.83687e-05
Zjn_sc00012.1.g00060.1.sm.mkhc	Zjn_sc00012.1.g00060.1.sm.mkhc.mRNA	Others	TR	down	8.74389e-06
Zjn_sc00012.1.g00310.1.sm.mkhc	#N/A	#N/A	#N/A	up	3.12897e-07
Zjn_sc00012.1.g00330.1.sm.mk	#N/A	#N/A	#N/A	up	0.000452452
Zjn_sc00012.1.g00600.1.am.mk	#N/A	#N/A	#N/A	up	6.49733e-05
Zjn_sc00012.1.g00610.1.am.mk	#N/A	#N/A	#N/A	up	7.34707e-05
Zjn_sc00012.1.g00620.1.sm.mk	Zjn_sc00012.1.g00620.1.sm.mk.mRNA	WRKY	TF	up	5.53733e-10
Zjn_sc00012.1.g00640.1.sm.mk	#N/A	#N/A	#N/A	down	9.37529e-06
Zjn_sc00012.1.g00720.1.am.mkhc	#N/A	#N/A	#N/A	down	1.02672e-11
Zjn_sc00012.1.g00900.1.sm.mkhc	Zjn_sc00012.1.g00900.1.sm.mkhc.mRNA	TKL-Pl-4	PK	up	2.81403e-08
Zjn_sc00012.1.g00920.1.am.mk	PB.4457.1	CMGC_MAPK	PK	up	5.86035e-08
Zjn_sc00012.1.g00960.1.am.mk	#N/A	#N/A	#N/A	up	4.10252e-11
Zjn_sc00012.1.g01130.1.sm.mkhc	#N/A	#N/A	#N/A	up	1.3497e-07
Zjn_sc00012.1.g01140.1.am.mkhc	PB.4465.1	bZIP	TF	up	9.23223e-07
Zjn_sc00012.1.g01180.1.am.mk	#N/A	#N/A	#N/A	down	0.000352789
Zjn_sc00012.1.g01230.1.am.mkhc	#N/A	#N/A	#N/A	up	0.000101772
Zjn_sc00012.1.g01280.1.sm.mkhc	#N/A	#N/A	#N/A	up	3.13052e-14
Zjn_sc00012.1.g01780.1.am.mk	#N/A	#N/A	#N/A	down	1.26211e-23
Zjn_sc00012.1.g01850.1.sm.mkhc	PB.4487.1	AUX/IAA	TR	up	1.97439e-06
Zjn_sc00012.1.g02360.1.am.mkhc	#N/A	#N/A	#N/A	down	4.27149e-07
Zjn_sc00012.1.g02430.1.sm.mk	#N/A	#N/A	#N/A	up	2.85139e-28
Zjn_sc00012.1.g02490.1.sm.mkhc	#N/A	#N/A	#N/A	up	6.27285e-10
Zjn_sc00012.1.g02500.1.am.mk	Zjn_sc00012.1.g02500.1.am.mk.mRNA	AP2/ERF-RAV	TF	up	1.07916e-12
Zjn_sc00012.1.g02710.1.sm.mkhc	#N/A	#N/A	#N/A	up	4.14652e-10
Zjn_sc00012.1.g02830.1.am.mk	#N/A	#N/A	#N/A	down	3.04479e-06
Zjn_sc00012.1.g02870.1.sm.mkhc	#N/A	#N/A	#N/A	down	1.46043e-15
Zjn_sc00012.1.g03060.1.sm.mkhc	Zjn_sc00012.1.g03060.1.sm.mkhc.mRNA	WRKY	TF	down	0.00635297
Zjn_sc00012.1.g03160.1.sm.mkhc	#N/A	#N/A	#N/A	down	9.67677e-17
Zjn_sc00012.1.g03310.1.am.mk	#N/A	#N/A	#N/A	down	2.27617e-05
Zjn_sc00012.1.g03330.1.es.mkhc	#N/A	#N/A	#N/A	down	2.98179e-07
Zjn_sc00012.1.g03920.1.sm.mkhc	#N/A	#N/A	#N/A	down	8.70266e-07
Zjn_sc00012.1.g04100.1.am.mk	#N/A	#N/A	#N/A	down	0.000132454
Zjn_sc00012.1.g04130.1.am.mk	#N/A	#N/A	#N/A	up	1.14826e-15
Zjn_sc00012.1.g04140.1.sm.mk	#N/A	#N/A	#N/A	down	0.00832372
Zjn_sc00012.1.g04390.1.am.mk	Zjn_sc00012.1.g04390.1.am.mk.mRNA	NAC	TF	up	1.36602e-10
Zjn_sc00012.1.g04480.1.sm.mkhc	#N/A	#N/A	#N/A	up	1.05004e-14
Zjn_sc00012.1.g04530.1.sm.mkhc	PB.4576.2	NAC	TF	up	6.01781e-11
Zjn_sc00012.1.g04900.1.am.mkhc	#N/A	#N/A	#N/A	up	3.26746e-09
Zjn_sc00012.1.g05510.1.am.mk	Zjn_sc00012.1.g05510.1.am.mk.mRNA	NAC	TF	down	8.98092e-16
Zjn_sc00012.1.g05590.1.sm.mkhc	#N/A	#N/A	#N/A	down	0.00597032
Zjn_sc00012.1.g05790.1.sm.mkhc	#N/A	#N/A	#N/A	up	6.65524e-08
Zjn_sc00012.1.g05800.1.sm.mk	#N/A	#N/A	#N/A	up	1.08496e-07
Zjn_sc00012.1.g05950.1.am.mkhc	#N/A	#N/A	#N/A	up	0.00022456
Zjn_sc00012.1.g06110.1.am.mk	#N/A	#N/A	#N/A	up	3.20799e-07
Zjn_sc00012.1.g06300.1.sm.mk	#N/A	#N/A	#N/A	down	0.000451538
Zjn_sc00012.1.g06340.1.am.mkhc	#N/A	#N/A	#N/A	down	3.31236e-10
Zjn_sc00012.1.g06650.1.sm.mk	#N/A	#N/A	#N/A	up	1.13202e-07
Zjn_sc00012.1.g06840.1.sm.mkhc	#N/A	#N/A	#N/A	up	0.000371828
Zjn_sc00012.1.g07050.1.sm.mk	Zjn_sc00012.1.g07050.1.sm.mk.mRNA	WRKY	TF	down	0.00127768
Zjn_sc00012.1.g07110.1.sm.mkhc	#N/A	#N/A	#N/A	down	9.43651e-08
Zjn_sc00012.1.g07300.1.am.mk	PB.4668.1	Group-Pl-4	PK	down	6.75334e-09
Zjn_sc00012.1.g07510.1.am.mk	#N/A	#N/A	#N/A	down	1.41658e-06
Zjn_sc00012.1.g07870.1.am.mkhc	#N/A	#N/A	#N/A	up	0.000149797
Zjn_sc00012.1.g08010.1.sm.mkhc	#N/A	#N/A	#N/A	down	5.82929e-05
Zjn_sc00012.1.g08020.1.sm.mk	#N/A	#N/A	#N/A	down	1.80326e-05
Zjn_sc00012.1.g08170.1.am.mk	#N/A	#N/A	#N/A	up	0.00796671
Zjn_sc00012.1.g08180.1.am.mkhc	#N/A	#N/A	#N/A	up	0.00107323
Zjn_sc00012.1.g08450.1.sm.mkhc	#N/A	#N/A	#N/A	up	3.33957e-05
Zjn_sc00012.1.g08570.1.am.mk	#N/A	#N/A	#N/A	down	2.68374e-06
Zjn_sc00012.1.g08800.1.am.mkhc	PB.4722.1	AGC_NDR	PK	up	0.000288028
Zjn_sc00012.1.g08850.1.sm.mkhc	#N/A	#N/A	#N/A	up	5.58431e-08
Zjn_sc00012.1.g08860.1.am.mk	#N/A	#N/A	#N/A	up	5.22328e-06
Zjn_sc00012.1.g08880.1.sm.mkhc	#N/A	#N/A	#N/A	up	0.00585995
Zjn_sc00012.1.g08920.1.am.mk	#N/A	#N/A	#N/A	down	4.33592e-12
Zjn_sc00012.1.g09000.1.am.mk	Zjn_sc00012.1.g09000.1.am.mk.mRNA	TCP	TF	down	0.00213572
Zjn_sc00012.1.g09060.1.sm.mkhc	#N/A	#N/A	#N/A	down	2.23319e-05
Zjn_sc00012.1.g09090.1.sm.mk	PB.4729.1	CAMK_CAMKL-CHK1	PK	up	5.81639e-12
Zjn_sc00012.1.g09270.1.am.mk	#N/A	#N/A	#N/A	down	0.000262762
Zjn_sc00012.1.g09440.1.sm.mkhc	#N/A	#N/A	#N/A	up	4.22565e-09
Zjn_sc00012.1.g09470.1.sm.mkhc	#N/A	#N/A	#N/A	down	2.69583e-14
Zjn_sc00012.1.g09510.1.sm.mkhc	#N/A	#N/A	#N/A	down	7.09109e-13
Zjn_sc00012.1.g09640.1.am.mk	#N/A	#N/A	#N/A	down	1.50484e-06
Zjn_sc00012.1.g09690.1.sm.mk	#N/A	#N/A	#N/A	up	0.000368467
Zjn_sc00012.1.g09710.1.sm.mkhc	#N/A	#N/A	#N/A	down	7.3923e-12
Zjn_sc00012.1.g09780.1.sm.mk	#N/A	#N/A	#N/A	down	0.00139556
Zjn_sc00012.1.g09930.1.am.mk	#N/A	#N/A	#N/A	down	2.41628e-05
Zjn_sc00012.1.g09960.1.sm.mkhc	#N/A	#N/A	#N/A	up	5.0183e-06
Zjn_sc00012.1.g10030.1.am.mk	#N/A	#N/A	#N/A	down	0.00392004
Zjn_sc00012.1.g10390.1.sm.mk	Zjn_sc00012.1.g10390.1.sm.mk.mRNA	RLK-Pelle_CR4L	PK	up	6.21629e-05
Zjn_sc00012.1.g10430.1.sm.mk	#N/A	#N/A	#N/A	up	3.04613e-05
Zjn_sc00012.1.g10620.1.sm.mkhc	#N/A	#N/A	#N/A	down	8.77381e-07
Zjn_sc00012.1.g10700.1.sm.mk	#N/A	#N/A	#N/A	down	0.000221794
Zjn_sc00013.1.g00360.1.am.mkhc	#N/A	#N/A	#N/A	down	2.98304e-35
Zjn_sc00013.1.g00540.1.am.mk	#N/A	#N/A	#N/A	up	0.00568382
Zjn_sc00013.1.g00830.1.sm.mkhc	#N/A	#N/A	#N/A	up	9.37448e-08
Zjn_sc00013.1.g01080.1.sm.mkhc	#N/A	#N/A	#N/A	up	5.33184e-08
Zjn_sc00013.1.g01220.1.am.mk	#N/A	#N/A	#N/A	down	4.23816e-05
Zjn_sc00013.1.g01340.1.am.mk	#N/A	#N/A	#N/A	down	1.97062e-09
Zjn_sc00013.1.g01450.1.sm.mkhc	#N/A	#N/A	#N/A	down	7.93279e-08
Zjn_sc00013.1.g01580.1.sm.mk	#N/A	#N/A	#N/A	down	6.32144e-06
Zjn_sc00013.1.g01760.1.sm.mkhc	#N/A	#N/A	#N/A	down	1.68821e-08
Zjn_sc00013.1.g01880.1.sm.mk	#N/A	#N/A	#N/A	down	9.69839e-11
Zjn_sc00013.1.g01920.1.sm.mk	PB.4853.2	Others	TR	down	1.5655e-16
Zjn_sc00013.1.g02100.1.sm.mkhc	#N/A	#N/A	#N/A	up	0.00799529
Zjn_sc00013.1.g02370.1.sm.mkhc	Zjn_sc00013.1.g02370.1.sm.mkhc.mRNA	Others	TR	up	2.38211e-10
Zjn_sc00013.1.g02450.1.am.mk	#N/A	#N/A	#N/A	down	4.14494e-06
Zjn_sc00013.1.g02480.1.sm.mkhc	#N/A	#N/A	#N/A	up	9.76554e-05
Zjn_sc00013.1.g02680.1.am.mk	Zjn_sc00013.1.g02680.1.am.mk.mRNA	GRAS	TF	up	0.000442361
Zjn_sc00013.1.g02790.1.sm.mkhc	#N/A	#N/A	#N/A	up	9.80564e-17
Zjn_sc00013.1.g02830.1.am.mk	#N/A	#N/A	#N/A	up	0.000424114
Zjn_sc00013.1.g03210.1.sm.mkhc	PB.4894.1	GRF	TF	up	3.1986e-13
Zjn_sc00013.1.g03240.1.sm.mk	#N/A	#N/A	#N/A	down	1.53332e-08
Zjn_sc00013.1.g03400.1.am.mk	#N/A	#N/A	#N/A	down	1.701e-05
Zjn_sc00013.1.g03410.1.am.mk	PB.4900.1	HB-BELL	TF	down	0.000451003
Zjn_sc00013.1.g03730.1.sm.mkhc	#N/A	#N/A	#N/A	up	2.71694e-06
Zjn_sc00013.1.g03860.1.am.mk	#N/A	#N/A	#N/A	down	0.00066784
Zjn_sc00013.1.g03900.1.am.mk	#N/A	#N/A	#N/A	up	5.33752e-06
Zjn_sc00013.1.g04030.1.sm.mkhc	#N/A	#N/A	#N/A	up	5.32911e-06
Zjn_sc00013.1.g04300.1.sm.mkhc	#N/A	#N/A	#N/A	up	1.58201e-07
Zjn_sc00013.1.g04370.1.sm.mkhc	#N/A	#N/A	#N/A	up	8.69523e-22
Zjn_sc00013.1.g04480.1.am.mk	#N/A	#N/A	#N/A	up	1.12566e-07
Zjn_sc00013.1.g04510.1.am.mk	#N/A	#N/A	#N/A	down	1.86202e-05
Zjn_sc00013.1.g04830.1.sm.mkhc	#N/A	#N/A	#N/A	down	5.33991e-06
Zjn_sc00013.1.g04930.1.am.mkhc	#N/A	#N/A	#N/A	down	0.00200947
Zjn_sc00013.1.g05070.1.sm.mkhc	#N/A	#N/A	#N/A	up	5.05142e-05
Zjn_sc00013.1.g05400.1.sm.mk	#N/A	#N/A	#N/A	down	7.21407e-08
Zjn_sc00013.1.g05530.1.sm.mkhc	#N/A	#N/A	#N/A	down	1.53586e-16
Zjn_sc00013.1.g05710.1.sm.mk	PB.4980.1	RLK-Pelle_L-LEC	PK	down	1.62024e-10
Zjn_sc00013.1.g05800.1.sm.mk	#N/A	#N/A	#N/A	down	0.000179448
Zjn_sc00013.1.g05980.1.sm.mkhc	#N/A	#N/A	#N/A	down	1.53647e-15
Zjn_sc00013.1.g06130.1.sm.mkhc	#N/A	#N/A	#N/A	down	0.000397136
Zjn_sc00013.1.g06160.1.sm.mkhc	#N/A	#N/A	#N/A	up	0.0020984
Zjn_sc00013.1.g06400.1.sm.mk	#N/A	#N/A	#N/A	down	0.00040089
Zjn_sc00013.1.g06470.1.sm.mk	#N/A	#N/A	#N/A	down	0.00045059
Zjn_sc00013.1.g06670.1.am.mk	#N/A	#N/A	#N/A	up	0.00065209
Zjn_sc00013.1.g06690.1.sm.mkhc	#N/A	#N/A	#N/A	up	2.62063e-06
Zjn_sc00013.1.g06920.1.sm.mkhc	#N/A	#N/A	#N/A	down	1.69223e-07
Zjn_sc00013.1.g07460.1.sm.mk	#N/A	#N/A	#N/A	down	1.25412e-07
Zjn_sc00013.1.g07500.1.sm.mkhc	#N/A	#N/A	#N/A	up	0.00169398
Zjn_sc00013.1.g07750.1.am.mk	#N/A	#N/A	#N/A	down	1.29571e-17
Zjn_sc00013.1.g07850.1.sm.mkhc	#N/A	#N/A	#N/A	down	1.36771e-07
Zjn_sc00013.1.g08200.1.am.mk	#N/A	#N/A	#N/A	down	5.22725e-06
Zjn_sc00013.1.g08310.1.sm.mk	#N/A	#N/A	#N/A	up	9.91186e-13
Zjn_sc00013.1.g08610.1.am.mk	PB.5093.1	C2C2-Dof	TF	up	1.2267e-10
Zjn_sc00013.1.g08820.1.am.mkhc	#N/A	#N/A	#N/A	up	0.00313398
Zjn_sc00013.1.g08890.1.sm.mk	#N/A	#N/A	#N/A	up	0.000279438
Zjn_sc00013.1.g08970.1.am.mk	#N/A	#N/A	#N/A	down	2.02991e-05
Zjn_sc00013.1.g08980.1.es.mkhc	#N/A	#N/A	#N/A	down	0.000504159
Zjn_sc00013.1.g09010.1.sm.mkhc	#N/A	#N/A	#N/A	down	1.6097e-05
Zjn_sc00013.1.g09110.1.sm.mkhc	#N/A	#N/A	#N/A	down	6.54716e-10
Zjn_sc00013.1.g09130.1.sm.mk	#N/A	#N/A	#N/A	up	1.92987e-21
Zjn_sc00013.1.g09140.1.sm.mkhc	#N/A	#N/A	#N/A	down	0.00132176
Zjn_sc00013.1.g09180.1.sm.mkhc	#N/A	#N/A	#N/A	up	5.56799e-12
Zjn_sc00013.1.g09240.1.am.mkhc	#N/A	#N/A	#N/A	down	0.00302279
Zjn_sc00013.1.g09250.1.sm.mkhc	#N/A	#N/A	#N/A	up	6.23827e-08
Zjn_sc00013.1.g09610.1.sm.mk	#N/A	#N/A	#N/A	down	2.44184e-14
Zjn_sc00013.1.g09710.1.am.mk	#N/A	#N/A	#N/A	down	5.38597e-17
Zjn_sc00013.1.g09820.1.am.mkhc	#N/A	#N/A	#N/A	up	1.24978e-07
Zjn_sc00013.1.g09950.1.am.mkhc	#N/A	#N/A	#N/A	down	0.00341517
Zjn_sc00013.1.g10210.1.am.mkhc	#N/A	#N/A	#N/A	down	1.62926e-07
Zjn_sc00013.1.g10300.1.sm.mk	#N/A	#N/A	#N/A	up	3.4227e-16
Zjn_sc00013.1.g10480.1.am.mkhc	#N/A	#N/A	#N/A	down	2.0847e-13
Zjn_sc00013.1.g10510.1.sm.mk	#N/A	#N/A	#N/A	up	2.1765e-11
Zjn_sc00013.1.g10550.1.sm.mkhc	#N/A	#N/A	#N/A	up	4.81155e-08
Zjn_sc00013.1.g10680.1.am.mk	#N/A	#N/A	#N/A	up	4.6794e-08
Zjn_sc00014.1.g00120.1.am.mk	#N/A	#N/A	#N/A	up	2.89018e-09
Zjn_sc00014.1.g00240.1.am.mk	#N/A	#N/A	#N/A	down	0.000200513
Zjn_sc00014.1.g00500.1.sm.mkhc	#N/A	#N/A	#N/A	down	0.00317031
Zjn_sc00014.1.g00600.1.sm.mkhc	#N/A	#N/A	#N/A	up	9.9967e-06
Zjn_sc00014.1.g00730.1.sm.mkhc	#N/A	#N/A	#N/A	up	0.000467056
Zjn_sc00014.1.g00780.1.am.mkhc	#N/A	#N/A	#N/A	up	2.67675e-07
Zjn_sc00014.1.g00810.1.am.mkhc	#N/A	#N/A	#N/A	up	4.1028e-06
Zjn_sc00014.1.g01050.1.sm.mk	#N/A	#N/A	#N/A	down	3.21409e-07
Zjn_sc00014.1.g01170.1.sm.mk	#N/A	#N/A	#N/A	down	0.000873265
Zjn_sc00014.1.g01210.1.sm.mk	#N/A	#N/A	#N/A	up	2.78299e-16
Zjn_sc00014.1.g01240.1.sm.mkhc	#N/A	#N/A	#N/A	up	6.60039e-08
Zjn_sc00014.1.g01410.1.sm.mkhc	#N/A	#N/A	#N/A	down	3.37355e-09
Zjn_sc00014.1.g01750.1.sm.mkhc	#N/A	#N/A	#N/A	down	8.23448e-09
Zjn_sc00014.1.g01800.1.sm.mkhc	#N/A	#N/A	#N/A	down	9.69862e-05
Zjn_sc00014.1.g02190.1.am.mkhc	PB.5261.1	Others	TR	down	1.3269e-08
Zjn_sc00014.1.g02350.1.sm.mkhc	#N/A	#N/A	#N/A	up	1.05473e-14
Zjn_sc00014.1.g02370.1.sm.mkhc	#N/A	#N/A	#N/A	up	2.1765e-11
Zjn_sc00014.1.g02400.1.sm.mk	Zjn_sc00014.1.g02400.1.sm.mk.mRNA	MYB	TF	up	1.58018e-05
Zjn_sc00014.1.g02550.1.sm.mkhc	#N/A	#N/A	#N/A	up	0.000201291
Zjn_sc00014.1.g02680.1.sm.mkhc	#N/A	#N/A	#N/A	down	1.1877e-05
Zjn_sc00014.1.g02930.1.sm.mk	#N/A	#N/A	#N/A	down	1.05182e-10
Zjn_sc00014.1.g03220.1.sm.mkhc	#N/A	#N/A	#N/A	up	0.00278408
Zjn_sc00014.1.g03260.1.sm.mk	#N/A	#N/A	#N/A	down	2.48064e-25
Zjn_sc00014.1.g03330.1.am.mk	#N/A	#N/A	#N/A	up	0.000104383
Zjn_sc00014.1.g03360.1.sm.mk	#N/A	#N/A	#N/A	up	7.97778e-05
Zjn_sc00014.1.g03380.1.sm.mkhc	#N/A	#N/A	#N/A	up	3.03869e-07
Zjn_sc00014.1.g03440.1.am.mk	#N/A	#N/A	#N/A	down	9.75964e-05
Zjn_sc00014.1.g03780.1.sm.mkhc	Zjn_sc00014.1.g03780.1.sm.mkhc.mRNA	AUX/IAA	TR	down	0.00039618
Zjn_sc00014.1.g03810.1.sm.mkhc	#N/A	#N/A	#N/A	down	0.00134367
Zjn_sc00014.1.g03960.1.sm.mkhc	#N/A	#N/A	#N/A	down	1.48927e-05
Zjn_sc00014.1.g03990.1.am.mk	#N/A	#N/A	#N/A	down	1.96959e-06
Zjn_sc00014.1.g04050.1.sm.mkhc	#N/A	#N/A	#N/A	down	1.73234e-11
Zjn_sc00014.1.g04080.1.sm.mkhc	#N/A	#N/A	#N/A	up	2.23549e-17
Zjn_sc00014.1.g04120.1.sm.mkhc	#N/A	#N/A	#N/A	down	1.4877e-12
Zjn_sc00014.1.g04160.1.sm.mkhc	#N/A	#N/A	#N/A	up	0.00287133
Zjn_sc00014.1.g04270.1.sm.mkhc	#N/A	#N/A	#N/A	down	1.43355e-05
Zjn_sc00014.1.g04410.1.am.mk	#N/A	#N/A	#N/A	up	7.21496e-06
Zjn_sc00014.1.g04490.1.sm.mk	#N/A	#N/A	#N/A	down	0.000577451
Zjn_sc00014.1.g04820.1.am.mkhc	#N/A	#N/A	#N/A	down	6.10368e-07
Zjn_sc00014.1.g04910.1.sm.mkhc	#N/A	#N/A	#N/A	down	7.37507e-12
Zjn_sc00014.1.g05270.1.sm.mk	Zjn_sc00014.1.g05270.1.sm.mk.mRNA	GNAT	TR	down	0.000910385
Zjn_sc00014.1.g05410.1.sm.mkhc	PB.5373.2	GARP-G2-like	TF	up	0.000519988
Zjn_sc00014.1.g05540.1.am.mk	#N/A	#N/A	#N/A	down	8.19168e-05
Zjn_sc00014.1.g05590.1.am.mk	#N/A	#N/A	#N/A	down	3.18288e-09
Zjn_sc00014.1.g05600.1.sm.mk	#N/A	#N/A	#N/A	up	7.32584e-05
Zjn_sc00014.1.g05700.1.am.mk	#N/A	#N/A	#N/A	down	0.000279893
Zjn_sc00014.1.g05780.1.sm.mkhc	#N/A	#N/A	#N/A	down	9.89179e-06
Zjn_sc00014.1.g05890.1.sm.mk	#N/A	#N/A	#N/A	down	6.92923e-06
Zjn_sc00014.1.g05930.1.sm.mk	PB.5389.1	RLK-Pelle_LRR-XI-1	PK	down	6.43811e-05
Zjn_sc00014.1.g06020.1.am.mk	#N/A	#N/A	#N/A	down	8.00754e-08
Zjn_sc00014.1.g06340.1.am.mkhc	#N/A	#N/A	#N/A	up	2.12289e-13
Zjn_sc00014.1.g06350.1.am.mk	#N/A	#N/A	#N/A	up	0.000913734
Zjn_sc00014.1.g06430.1.sm.mkhc	#N/A	#N/A	#N/A	down	5.61743e-05
Zjn_sc00014.1.g06620.1.sm.mk	PB.5411.1	mTERF	TR	down	6.28328e-07
Zjn_sc00014.1.g06700.1.am.mk	#N/A	#N/A	#N/A	down	1.38325e-08
Zjn_sc00014.1.g06760.1.am.mk	#N/A	#N/A	#N/A	down	1.14826e-15
Zjn_sc00014.1.g06840.1.sm.mkhc	Zjn_sc00014.1.g06840.1.sm.mkhc.mRNA	CAMK_CDPK	PK	up	3.49495e-07
Zjn_sc00014.1.g07060.1.am.mk	Zjn_sc00014.1.g07060.1.am.mk.mRNA	GNAT	TR	up	4.65235e-05
Zjn_sc00014.1.g07330.1.am.mk	PB.5441.1	AUX/IAA	TR	up	9.33423e-09
Zjn_sc00014.1.g07340.1.am.mk	#N/A	#N/A	#N/A	down	1.75064e-06
Zjn_sc00014.1.g07430.1.am.mk	#N/A	#N/A	#N/A	up	0.00129604
Zjn_sc00014.1.g07540.1.am.mk	#N/A	#N/A	#N/A	up	8.29321e-16
Zjn_sc00014.1.g07620.1.sm.mkhc	#N/A	#N/A	#N/A	up	3.15947e-06
Zjn_sc00014.1.g07660.1.am.mk	#N/A	#N/A	#N/A	down	2.46369e-06
Zjn_sc00014.1.g07700.1.sm.mkhc	#N/A	#N/A	#N/A	down	1.09687e-08
Zjn_sc00014.1.g07760.1.sm.mkhc	#N/A	#N/A	#N/A	down	1.60758e-18
Zjn_sc00014.1.g07770.1.am.mkhc	#N/A	#N/A	#N/A	up	2.59779e-06
Zjn_sc00014.1.g07840.1.am.mk	#N/A	#N/A	#N/A	down	2.15879e-14
Zjn_sc00014.1.g08110.1.am.mk	#N/A	#N/A	#N/A	up	1.37457e-06
Zjn_sc00014.1.g08380.1.sm.mkhc	#N/A	#N/A	#N/A	down	1.33138e-07
Zjn_sc00014.1.g08430.1.sm.mkhc	#N/A	#N/A	#N/A	up	0.000112725
Zjn_sc00014.1.g08440.1.am.mk	#N/A	#N/A	#N/A	up	0.0064358
Zjn_sc00014.1.g08460.1.sm.mkhc	#N/A	#N/A	#N/A	down	2.18999e-09
Zjn_sc00014.1.g08500.1.sm.mk	Zjn_sc00014.1.g08500.1.sm.mk.mRNA	AP2/ERF-AP2	TF	down	0.00253582
Zjn_sc00014.1.g08520.1.sm.mkhc	#N/A	#N/A	#N/A	down	2.59497e-06
Zjn_sc00014.1.g08540.1.sm.mkhc	#N/A	#N/A	#N/A	down	3.46562e-15
Zjn_sc00014.1.g08650.1.sm.mk	#N/A	#N/A	#N/A	down	8.3225e-07
Zjn_sc00014.1.g08710.1.am.mk	Zjn_sc00014.1.g08710.1.am.mk.mRNA	C2C2-Dof	TF	up	8.11783e-08
Zjn_sc00014.1.g09000.1.am.mk	#N/A	#N/A	#N/A	down	1.51983e-07
Zjn_sc00014.1.g09050.1.sm.mkhc	#N/A	#N/A	#N/A	down	1.39628e-09
Zjn_sc00014.1.g09070.1.am.mk	#N/A	#N/A	#N/A	down	4.78056e-06
Zjn_sc00014.1.g09080.1.am.mk	#N/A	#N/A	#N/A	up	5.58404e-05
Zjn_sc00014.1.g09180.1.sm.mkhc	#N/A	#N/A	#N/A	up	2.32782e-10
Zjn_sc00014.1.g09330.1.sm.mk	#N/A	#N/A	#N/A	down	8.42497e-05
Zjn_sc00014.1.g09370.1.am.mk	#N/A	#N/A	#N/A	down	2.04022e-06
Zjn_sc00014.1.g09560.1.sm.mk	#N/A	#N/A	#N/A	down	1.18964e-26
Zjn_sc00014.1.g09680.1.sm.mk	PB.5529.1	CMGC_GSK	PK	down	4.7762e-15
Zjn_sc00014.1.g09700.1.sm.mkhc	#N/A	#N/A	#N/A	down	3.16594e-08
Zjn_sc00014.1.g09780.1.am.mk	#N/A	#N/A	#N/A	down	1.96151e-08
Zjn_sc00014.1.g09820.1.sm.mk	#N/A	#N/A	#N/A	down	8.15662e-13
Zjn_sc00014.1.g09890.1.sm.mkhc	#N/A	#N/A	#N/A	up	7.85716e-13
Zjn_sc00014.1.g09910.1.sm.mkhc	Zjn_sc00014.1.g09910.1.sm.mkhc.mRNA	CMGC_RCK	PK	up	0.00136286
Zjn_sc00014.1.g09950.1.am.mk	#N/A	#N/A	#N/A	down	6.11953e-05
Zjn_sc00014.1.g10060.1.sm.mk	#N/A	#N/A	#N/A	down	5.17067e-05
Zjn_sc00014.1.g10080.1.sm.mk	#N/A	#N/A	#N/A	down	8.58481e-12
Zjn_sc00014.1.g10140.1.sm.mkhc	#N/A	#N/A	#N/A	down	3.41549e-23
Zjn_sc00014.1.g10200.1.sm.mkhc	#N/A	#N/A	#N/A	down	0.000666759
Zjn_sc00014.1.g10210.1.sm.mkhc	#N/A	#N/A	#N/A	down	0.000212678
Zjn_sc00014.1.g10460.1.sm.mkhc	#N/A	#N/A	#N/A	down	1.10373e-20
Zjn_sc00014.1.g10650.1.am.mk	#N/A	#N/A	#N/A	up	1.23283e-05
Zjn_sc00014.1.g10670.1.am.mk	#N/A	#N/A	#N/A	up	5.48123e-08
Zjn_sc00014.1.g10700.1.sm.mk	#N/A	#N/A	#N/A	down	7.78909e-06
Zjn_sc00015.1.g00200.1.sm.mkhc	#N/A	#N/A	#N/A	up	3.95678e-06
Zjn_sc00015.1.g00260.1.sm.mkhc	#N/A	#N/A	#N/A	down	1.90299e-05
Zjn_sc00015.1.g00610.1.sm.mkhc	#N/A	#N/A	#N/A	down	0.000129048
Zjn_sc00015.1.g00720.1.am.mk	#N/A	#N/A	#N/A	up	0.00556383
Zjn_sc00015.1.g00790.1.sm.mk	#N/A	#N/A	#N/A	up	0.00385044
Zjn_sc00015.1.g01010.1.sm.mkhc	#N/A	#N/A	#N/A	down	3.49996e-07
Zjn_sc00015.1.g01030.1.sm.mkhc	#N/A	#N/A	#N/A	down	4.70372e-09
Zjn_sc00015.1.g01070.1.sm.mk	#N/A	#N/A	#N/A	up	2.45375e-17
Zjn_sc00015.1.g01190.1.sm.mk	PB.5610.1	MYB	TF	up	4.76405e-09
Zjn_sc00015.1.g01530.1.am.mkhc	#N/A	#N/A	#N/A	down	8.38019e-11
Zjn_sc00015.1.g01630.1.sm.mkhc	#N/A	#N/A	#N/A	down	4.28311e-21
Zjn_sc00015.1.g01870.1.sm.mkhc	#N/A	#N/A	#N/A	down	1.09618e-05
Zjn_sc00015.1.g01890.1.am.mk	Zjn_sc00015.1.g01890.1.am.mk.mRNA	MYB	TF	down	1.88845e-15
Zjn_sc00015.1.g02110.1.sm.mkhc	#N/A	#N/A	#N/A	down	1.75734e-20
Zjn_sc00015.1.g02130.1.am.mk	PB.5637.2	CAMK_CAMKL-CHK1	PK	down	0.000245311
Zjn_sc00015.1.g02140.1.sm.mk	Zjn_sc00015.1.g02140.1.sm.mk.mRNA	CAMK_CAMKL-CHK1	PK	down	1.15191e-09
Zjn_sc00015.1.g02290.1.am.mk	#N/A	#N/A	#N/A	down	3.07808e-05
Zjn_sc00015.1.g02300.1.sm.mkhc	#N/A	#N/A	#N/A	up	1.37884e-16
Zjn_sc00015.1.g02380.1.am.mk	#N/A	#N/A	#N/A	down	2.50708e-15
Zjn_sc00015.1.g02590.1.am.mk	#N/A	#N/A	#N/A	down	0.000244735
Zjn_sc00015.1.g02650.1.sm.mkhc	#N/A	#N/A	#N/A	down	8.75417e-07
Zjn_sc00015.1.g02680.1.sm.mk	#N/A	#N/A	#N/A	up	0.00239922
Zjn_sc00015.1.g02950.1.sm.mk	#N/A	#N/A	#N/A	up	0.000239356
Zjn_sc00015.1.g03000.1.sm.mkhc	#N/A	#N/A	#N/A	down	5.37608e-17
Zjn_sc00015.1.g03120.1.sm.mkhc	#N/A	#N/A	#N/A	down	9.16499e-16
Zjn_sc00015.1.g03150.1.am.mk	#N/A	#N/A	#N/A	up	2.84061e-13
Zjn_sc00015.1.g03510.1.am.mk	PB.5670.1	AP2/ERF-ERF	TF	down	0.00263346
Zjn_sc00015.1.g03840.1.sm.mk	#N/A	#N/A	#N/A	down	6.2547e-31
Zjn_sc00015.1.g04100.1.sm.mkhc	#N/A	#N/A	#N/A	up	2.90317e-17
Zjn_sc00015.1.g04200.1.am.mk	#N/A	#N/A	#N/A	up	5.74493e-09
Zjn_sc00015.1.g04220.1.sm.mkhc	PB.5701.1	RLK-Pelle_WAK	PK	up	1.29742e-07
Zjn_sc00015.1.g04420.1.sm.mk	Zjn_sc00015.1.g04420.1.sm.mk.mRNA	bZIP	TF	up	0.00106606
Zjn_sc00015.1.g04800.1.sm.mkhc	PB.5720.1	TRAF	TR	up	1.35928e-13
Zjn_sc00015.1.g04830.1.sm.mkhc	#N/A	#N/A	#N/A	up	5.63245e-38
Zjn_sc00015.1.g04920.1.sm.mk	#N/A	#N/A	#N/A	up	8.91188e-05
Zjn_sc00015.1.g05400.1.sm.mkhc	#N/A	#N/A	#N/A	up	0.00276941
Zjn_sc00015.1.g05620.1.am.mk	#N/A	#N/A	#N/A	down	3.04635e-11
Zjn_sc00015.1.g05800.1.sm.mkhc	#N/A	#N/A	#N/A	down	0.000941706
Zjn_sc00015.1.g05920.1.sm.mkhc	#N/A	#N/A	#N/A	up	2.6298e-05
Zjn_sc00015.1.g05980.1.am.mk	#N/A	#N/A	#N/A	down	0.000477528
Zjn_sc00015.1.g05990.1.sm.mkhc	#N/A	#N/A	#N/A	down	2.727e-10
Zjn_sc00015.1.g06090.1.am.mk	#N/A	#N/A	#N/A	up	0.000199532
Zjn_sc00015.1.g06230.1.sm.mk	PB.5771.1	bHLH	TF	down	0.000539962
Zjn_sc00015.1.g06310.1.am.mk	#N/A	#N/A	#N/A	down	9.91595e-06
Zjn_sc00015.1.g06430.1.am.mk	#N/A	#N/A	#N/A	up	2.80442e-23
Zjn_sc00015.1.g06460.1.sm.mk	#N/A	#N/A	#N/A	up	1.42346e-18
Zjn_sc00015.1.g06960.1.sm.mkhc	#N/A	#N/A	#N/A	up	1.61947e-07
Zjn_sc00015.1.g06970.1.sm.mkhc	PB.5801.1	RLK-Pelle_RLCK-VIII	PK	up	6.54716e-10
Zjn_sc00015.1.g07060.1.sm.mkhc	#N/A	#N/A	#N/A	down	0.00214158
Zjn_sc00015.1.g07330.1.sm.mk	#N/A	#N/A	#N/A	down	1.35982e-11
Zjn_sc00015.1.g07380.1.sm.mk	#N/A	#N/A	#N/A	down	3.78558e-14
Zjn_sc00015.1.g07420.1.am.mk	Zjn_sc00015.1.g07420.1.am.mk.mRNA	MYB	TF	up	0.00133383
Zjn_sc00015.1.g07560.1.sm.mkhc	#N/A	#N/A	#N/A	down	0.00020989
Zjn_sc00015.1.g07610.1.am.mk	#N/A	#N/A	#N/A	down	7.68347e-05
Zjn_sc00015.1.g07650.1.am.mkhc	#N/A	#N/A	#N/A	down	1.9504e-08
Zjn_sc00015.1.g07750.1.am.mkhc	#N/A	#N/A	#N/A	up	5.33855e-09
Zjn_sc00015.1.g07770.1.sm.mkhc	#N/A	#N/A	#N/A	down	1.56523e-11
Zjn_sc00015.1.g07780.1.sm.mk	#N/A	#N/A	#N/A	down	2.99181e-09
Zjn_sc00015.1.g07870.1.am.mkhc	#N/A	#N/A	#N/A	up	0.000563894
Zjn_sc00015.1.g07990.1.sm.mkhc	#N/A	#N/A	#N/A	down	5.36993e-06
Zjn_sc00015.1.g08070.1.sm.mkhc	#N/A	#N/A	#N/A	down	1.24185e-19
Zjn_sc00015.1.g08080.1.sm.mkhc	#N/A	#N/A	#N/A	down	6.35998e-07
Zjn_sc00015.1.g08100.1.sm.mkhc	#N/A	#N/A	#N/A	down	4.19842e-39
Zjn_sc00015.1.g08340.1.am.mkhc	#N/A	#N/A	#N/A	down	1.6728e-10
Zjn_sc00015.1.g08410.1.sm.mkhc	#N/A	#N/A	#N/A	down	1.01343e-19
Zjn_sc00016.1.g00060.1.am.mkhc	#N/A	#N/A	#N/A	up	0.00159414
Zjn_sc00016.1.g00080.1.am.mk	#N/A	#N/A	#N/A	up	7.31906e-08
Zjn_sc00016.1.g00120.1.am.mk	#N/A	#N/A	#N/A	down	5.08879e-05
Zjn_sc00016.1.g00360.1.am.mk	#N/A	#N/A	#N/A	up	0.00127176
Zjn_sc00016.1.g00590.1.sm.mkhc	#N/A	#N/A	#N/A	up	0.000353153
Zjn_sc00016.1.g00600.1.sm.mkhc	#N/A	#N/A	#N/A	up	5.5283e-09
Zjn_sc00016.1.g00740.1.sm.mk	#N/A	#N/A	#N/A	down	2.02397e-06
Zjn_sc00016.1.g00900.1.sm.mkhc	#N/A	#N/A	#N/A	down	2.94036e-10
Zjn_sc00016.1.g01330.1.am.mk	#N/A	#N/A	#N/A	down	2.13978e-06
Zjn_sc00016.1.g01340.1.es.mkhc	#N/A	#N/A	#N/A	down	4.39127e-09
Zjn_sc00016.1.g01400.1.sm.mk	#N/A	#N/A	#N/A	up	0.000137274
Zjn_sc00016.1.g01420.1.am.mk	#N/A	#N/A	#N/A	up	4.18549e-09
Zjn_sc00016.1.g01580.1.sm.mk	PB.5903.1	RLK-Pelle_SD-2b	PK	up	0.00996639
Zjn_sc00016.1.g01700.1.sm.mkhc	#N/A	#N/A	#N/A	up	0.00441547
Zjn_sc00016.1.g01780.1.sm.mkhc	PB.5909.2	AUX/IAA	TR	down	2.76345e-28
Zjn_sc00016.1.g01940.1.sm.mkhc	#N/A	#N/A	#N/A	down	3.10341e-17
Zjn_sc00016.1.g01980.1.am.mk	PB.5917.1	RLK-Pelle_SD-2b	PK	down	4.47546e-13
Zjn_sc00016.1.g02120.1.sm.mk	#N/A	#N/A	#N/A	down	3.12972e-19
Zjn_sc00016.1.g02170.1.sm.mk	#N/A	#N/A	#N/A	down	0.000348527
Zjn_sc00016.1.g02250.1.sm.mkhc	PB.5923.1	RLK-Pelle_RLCK-V	PK	up	2.1672e-11
Zjn_sc00016.1.g02430.1.sm.mk	#N/A	#N/A	#N/A	down	0.00566364
Zjn_sc00016.1.g02790.1.sm.mkhc	#N/A	#N/A	#N/A	up	1.78232e-18
Zjn_sc00016.1.g02800.1.sm.mk	PB.5939.2	C3H	TF	down	2.64965e-07
Zjn_sc00016.1.g02820.1.am.mkhc	#N/A	#N/A	#N/A	down	0.00569077
Zjn_sc00016.1.g03230.1.am.mk	#N/A	#N/A	#N/A	up	2.27195e-12
Zjn_sc00016.1.g03330.1.sm.mk	#N/A	#N/A	#N/A	down	4.3041e-08
Zjn_sc00016.1.g03360.1.am.mk	#N/A	#N/A	#N/A	down	2.41839e-06
Zjn_sc00016.1.g03380.1.am.mk	#N/A	#N/A	#N/A	down	0.00178159
Zjn_sc00016.1.g03410.1.sm.mk	#N/A	#N/A	#N/A	down	0.00929159
Zjn_sc00016.1.g03430.1.am.mk	#N/A	#N/A	#N/A	up	1.30837e-07
Zjn_sc00016.1.g03440.1.am.mk	#N/A	#N/A	#N/A	up	0.00233424
Zjn_sc00016.1.g03720.1.sm.mkhc	#N/A	#N/A	#N/A	up	4.11517e-09
Zjn_sc00016.1.g03950.1.sm.mkhc	#N/A	#N/A	#N/A	up	9.99092e-05
Zjn_sc00016.1.g04280.1.am.mk	#N/A	#N/A	#N/A	up	5.28828e-05
Zjn_sc00016.1.g04350.1.sm.mkhc	#N/A	#N/A	#N/A	up	1.1962e-12
Zjn_sc00016.1.g04630.1.sm.mk	#N/A	#N/A	#N/A	up	2.06227e-13
Zjn_sc00016.1.g04690.1.sm.mkhc	#N/A	#N/A	#N/A	down	8.87264e-24
Zjn_sc00016.1.g04700.1.am.mk	#N/A	#N/A	#N/A	down	2.43135e-09
Zjn_sc00016.1.g05180.1.am.mkhc	Zjn_sc00016.1.g05180.1.am.mkhc.mRNA	HB-KNOX	TF	up	1.91461e-05
Zjn_sc00016.1.g05200.1.am.mkhc	#N/A	#N/A	#N/A	up	4.61699e-14
Zjn_sc00016.1.g05230.1.sm.mkhc	#N/A	#N/A	#N/A	down	1.09792e-12
Zjn_sc00016.1.g05270.1.sm.mkhc	#N/A	#N/A	#N/A	down	3.46302e-08
Zjn_sc00016.1.g05280.1.am.mk	PB.6049.2	Trihelix	TF	up	1.73237e-07
Zjn_sc00016.1.g05340.1.sm.mkhc	#N/A	#N/A	#N/A	down	0.000221412
Zjn_sc00016.1.g05650.1.sm.mkhc	#N/A	#N/A	#N/A	up	2.12852e-16
Zjn_sc00016.1.g05680.1.am.mkhc	#N/A	#N/A	#N/A	down	2.27064e-06
Zjn_sc00016.1.g05880.1.am.mk	#N/A	#N/A	#N/A	up	1.60839e-23
Zjn_sc00016.1.g05920.1.am.mk	Zjn_sc00016.1.g05920.1.am.mk.mRNA	C2H2	TF	up	1.15351e-09
Zjn_sc00016.1.g05970.1.am.mk	#N/A	#N/A	#N/A	up	3.29648e-15
Zjn_sc00016.1.g05990.1.sm.mkhc	#N/A	#N/A	#N/A	down	1.73959e-05
Zjn_sc00016.1.g06140.1.am.mk	#N/A	#N/A	#N/A	down	0.000270312
Zjn_sc00016.1.g06210.1.sm.mkhc	#N/A	#N/A	#N/A	down	2.0954e-15
Zjn_sc00016.1.g06250.1.sm.mkhc	#N/A	#N/A	#N/A	down	0.00896197
Zjn_sc00016.1.g06660.1.sm.mkhc	#N/A	#N/A	#N/A	down	5.85339e-07
Zjn_sc00016.1.g06700.1.am.mkhc	#N/A	#N/A	#N/A	up	3.18729e-06
Zjn_sc00016.1.g06740.1.sm.mk	#N/A	#N/A	#N/A	up	1.47444e-21
Zjn_sc00016.1.g06930.1.am.mk	Zjn_sc00016.1.g06930.1.am.mk.mRNA	GRAS	TF	up	1.10438e-07
Zjn_sc00016.1.g07010.1.sm.mkhc	#N/A	#N/A	#N/A	down	2.09758e-17
Zjn_sc00017.1.g00060.1.sm.mkhc	#N/A	#N/A	#N/A	up	0.00279839
Zjn_sc00017.1.g00190.1.am.mk	PB.6123.1	NAC	TF	up	0.00738089
Zjn_sc00017.1.g00390.1.sm.mkhc	#N/A	#N/A	#N/A	up	6.53282e-07
Zjn_sc00017.1.g00760.1.sm.mkhc	#N/A	#N/A	#N/A	up	4.97094e-08
Zjn_sc00017.1.g00900.1.sm.mkhc	#N/A	#N/A	#N/A	down	0.00061558
Zjn_sc00017.1.g00950.1.sm.mk	#N/A	#N/A	#N/A	up	2.84115e-18
Zjn_sc00017.1.g00960.1.sm.mkhc	#N/A	#N/A	#N/A	down	7.18796e-06
Zjn_sc00017.1.g01110.1.sm.mk	#N/A	#N/A	#N/A	up	5.36714e-10
Zjn_sc00017.1.g01210.1.sm.mkhc	#N/A	#N/A	#N/A	up	0.00239409
Zjn_sc00017.1.g01380.1.sm.mkhc	#N/A	#N/A	#N/A	down	1.54491e-07
Zjn_sc00017.1.g01630.1.sm.mk	#N/A	#N/A	#N/A	down	3.49348e-16
Zjn_sc00017.1.g01980.1.am.mkhc	#N/A	#N/A	#N/A	down	0.000357949
Zjn_sc00017.1.g02020.1.sm.mkhc	#N/A	#N/A	#N/A	down	0.0055296
Zjn_sc00017.1.g02140.1.am.mk	#N/A	#N/A	#N/A	down	6.32942e-05
Zjn_sc00017.1.g02190.1.cf.mkhc	#N/A	#N/A	#N/A	down	0.00148253
Zjn_sc00017.1.g02340.1.sm.mkhc	PB.6189.1	NAC	TF	up	1.88552e-20
Zjn_sc00017.1.g02520.1.am.mk	#N/A	#N/A	#N/A	down	0.000559083
Zjn_sc00017.1.g02800.1.sm.mk	#N/A	#N/A	#N/A	down	2.39e-05
Zjn_sc00017.1.g03110.1.sm.mk	#N/A	#N/A	#N/A	down	3.99274e-18
Zjn_sc00017.1.g03220.1.am.mk	#N/A	#N/A	#N/A	down	0.000917117
Zjn_sc00017.1.g03280.1.sm.mk	#N/A	#N/A	#N/A	down	5.92433e-05
Zjn_sc00017.1.g03330.1.sm.mkhc	#N/A	#N/A	#N/A	down	6.33804e-13
Zjn_sc00017.1.g03440.1.am.mk	#N/A	#N/A	#N/A	up	0.00656628
Zjn_sc00017.1.g03490.1.am.mk	#N/A	#N/A	#N/A	up	4.07843e-14
Zjn_sc00017.1.g03570.1.sm.mkhc	PB.6251.1	CAMK_OST1L	PK	up	3.35068e-10
Zjn_sc00017.1.g03770.1.am.mk	#N/A	#N/A	#N/A	up	0.000213796
Zjn_sc00017.1.g03790.1.sm.mkhc	PB.6258.1	Trihelix	TF	down	4.34249e-05
Zjn_sc00017.1.g03860.1.sm.mkhc	#N/A	#N/A	#N/A	down	1.35046e-11
Zjn_sc00017.1.g03880.1.sm.mkhc	#N/A	#N/A	#N/A	up	8.55955e-05
Zjn_sc00017.1.g03890.1.am.mk	#N/A	#N/A	#N/A	down	0.00126637
Zjn_sc00017.1.g03970.1.sm.mkhc	#N/A	#N/A	#N/A	up	3.60699e-20
Zjn_sc00017.1.g03980.1.sm.mkhc	#N/A	#N/A	#N/A	up	1.06641e-10
Zjn_sc00017.1.g04040.1.sm.mk	#N/A	#N/A	#N/A	down	0.000210918
Zjn_sc00017.1.g04150.1.am.mk	#N/A	#N/A	#N/A	up	1.82984e-13
Zjn_sc00017.1.g04430.1.am.mk	#N/A	#N/A	#N/A	up	6.33515e-08
Zjn_sc00017.1.g04520.1.sm.mk	#N/A	#N/A	#N/A	down	0.00865955
Zjn_sc00017.1.g04970.1.am.mk	#N/A	#N/A	#N/A	down	4.88408e-05
Zjn_sc00017.1.g05040.1.sm.mk	#N/A	#N/A	#N/A	up	3.52816e-16
Zjn_sc00017.1.g05410.1.es.mkhc	#N/A	#N/A	#N/A	down	0.000235407
Zjn_sc00017.1.g05430.1.sm.mkhc	#N/A	#N/A	#N/A	up	0.000477337
Zjn_sc00017.1.g05440.1.am.mk	#N/A	#N/A	#N/A	up	0.00446638
Zjn_sc00017.1.g05500.1.am.mkhc	#N/A	#N/A	#N/A	down	5.02156e-06
Zjn_sc00017.1.g05700.1.sm.mkhc	Zjn_sc00017.1.g05700.1.sm.mkhc.mRNA	WRKY	TF	down	1.88169e-07
Zjn_sc00017.1.g06080.1.am.mkhc	#N/A	#N/A	#N/A	up	1.01506e-32
Zjn_sc00017.1.g06320.1.sm.mkhc	#N/A	#N/A	#N/A	down	0.00235774
Zjn_sc00017.1.g06710.1.sm.mkhc	PB.6357.1	RLK-Pelle_DLSV	PK	down	6.05103e-07
Zjn_sc00017.1.g06810.1.sm.mk	#N/A	#N/A	#N/A	down	4.26723e-07
Zjn_sc00017.1.g07130.1.sm.mkhc	#N/A	#N/A	#N/A	up	0.0046027
Zjn_sc00017.1.g07160.1.sm.mkhc	Zjn_sc00017.1.g07160.1.sm.mkhc.mRNA	MYB	TF	up	0.00412566
Zjn_sc00017.1.g07180.1.am.mk	#N/A	#N/A	#N/A	up	0.00751469
Zjn_sc00017.1.g07420.1.am.mk	#N/A	#N/A	#N/A	up	2.37896e-10
Zjn_sc00017.1.g07530.1.sm.mk	#N/A	#N/A	#N/A	up	0.00100877
Zjn_sc00017.1.g07640.1.am.mk	#N/A	#N/A	#N/A	up	4.4335e-17
Zjn_sc00017.1.g07730.1.sm.mkhc	#N/A	#N/A	#N/A	down	0.00160944
Zjn_sc00017.1.g07750.1.sm.mkhc	#N/A	#N/A	#N/A	up	4.7787e-12
Zjn_sc00018.1.g00070.1.am.mkhc	#N/A	#N/A	#N/A	up	1.5638e-16
Zjn_sc00018.1.g00130.1.am.mk	#N/A	#N/A	#N/A	up	1.24168e-07
Zjn_sc00018.1.g00210.1.sm.mkhc	#N/A	#N/A	#N/A	down	0.00982589
Zjn_sc00018.1.g00230.1.am.mk	PB.6409.1	CAMK_CAMKL-CHK1	PK	down	4.00718e-06
Zjn_sc00018.1.g00250.1.sm.mk	Zjn_sc00018.1.g00250.1.sm.mk.mRNA	GARP-G2-like	TF	up	0.000328256
Zjn_sc00018.1.g00280.1.sm.mkhc	#N/A	#N/A	#N/A	down	0.0056014
Zjn_sc00018.1.g00450.1.am.mk	#N/A	#N/A	#N/A	up	3.99333e-09
Zjn_sc00018.1.g00530.1.am.mkhc	#N/A	#N/A	#N/A	down	0.00282242
Zjn_sc00018.1.g00540.1.am.mk	#N/A	#N/A	#N/A	down	2.90822e-24
Zjn_sc00018.1.g00890.1.sm.mkhc	#N/A	#N/A	#N/A	up	2.77569e-07
Zjn_sc00018.1.g01120.1.am.mk	#N/A	#N/A	#N/A	up	5.24096e-14
Zjn_sc00018.1.g01180.1.am.mk	#N/A	#N/A	#N/A	up	4.62888e-21
Zjn_sc00018.1.g01290.1.am.mk	#N/A	#N/A	#N/A	up	2.73448e-06
Zjn_sc00018.1.g01340.1.sm.mkhc	#N/A	#N/A	#N/A	down	0.00920975
Zjn_sc00018.1.g01500.1.am.mk	#N/A	#N/A	#N/A	down	1.11089e-07
Zjn_sc00018.1.g01560.1.am.mkhc	#N/A	#N/A	#N/A	down	1.64604e-08
Zjn_sc00018.1.g01620.1.sm.mkhc	#N/A	#N/A	#N/A	up	6.1439e-06
Zjn_sc00018.1.g01940.1.am.mkhc	#N/A	#N/A	#N/A	down	2.72161e-09
Zjn_sc00018.1.g02060.1.sm.mkhc	#N/A	#N/A	#N/A	up	1.76111e-09
Zjn_sc00018.1.g02110.1.am.mkhc	#N/A	#N/A	#N/A	up	5.25318e-06
Zjn_sc00018.1.g02170.1.sm.mk	#N/A	#N/A	#N/A	down	0.000140977
Zjn_sc00018.1.g02180.1.am.mk	#N/A	#N/A	#N/A	up	0.00343025
Zjn_sc00018.1.g02190.1.am.mk	#N/A	#N/A	#N/A	up	7.19365e-06
Zjn_sc00018.1.g02290.1.am.mk	#N/A	#N/A	#N/A	down	4.32716e-17
Zjn_sc00018.1.g02600.1.sm.mkhc	#N/A	#N/A	#N/A	down	6.64274e-06
Zjn_sc00018.1.g02880.1.am.mk	PB.6499.1	HB-HD-ZIP	TF	down	0.000124
Zjn_sc00018.1.g02910.1.am.mk	#N/A	#N/A	#N/A	down	0.000513117
Zjn_sc00018.1.g02920.1.am.mk	#N/A	#N/A	#N/A	down	5.17617e-12
Zjn_sc00018.1.g03010.1.sm.mkhc	#N/A	#N/A	#N/A	down	8.17138e-05
Zjn_sc00018.1.g03100.1.am.mk	#N/A	#N/A	#N/A	up	4.78596e-06
Zjn_sc00018.1.g03290.1.sm.mkhc	#N/A	#N/A	#N/A	down	0.000567211
Zjn_sc00018.1.g03380.1.sm.mkhc	#N/A	#N/A	#N/A	down	0.000144444
Zjn_sc00018.1.g03670.1.sm.mkhc	PB.6518.1	bZIP	TF	down	1.8061e-08
Zjn_sc00018.1.g03760.1.sm.mk	PB.6521.1	RLK-Pelle_SD-2b	PK	up	1.18817e-11
Zjn_sc00018.1.g03770.1.am.mk	#N/A	#N/A	#N/A	up	0.00302752
Zjn_sc00018.1.g03890.1.am.mkhc	#N/A	#N/A	#N/A	up	1.57472e-16
Zjn_sc00018.1.g03900.1.am.mk	#N/A	#N/A	#N/A	up	0.000591704
Zjn_sc00018.1.g04420.1.am.mkhc	#N/A	#N/A	#N/A	up	2.09436e-18
Zjn_sc00018.1.g04530.1.am.mk	#N/A	#N/A	#N/A	up	1.1746e-11
Zjn_sc00018.1.g04620.1.sm.mkhc	#N/A	#N/A	#N/A	down	7.69207e-11
Zjn_sc00018.1.g04690.1.sm.mkhc	#N/A	#N/A	#N/A	up	1.18817e-11
Zjn_sc00018.1.g04700.1.am.mk	#N/A	#N/A	#N/A	up	6.25841e-14
Zjn_sc00018.1.g04740.1.am.mk	#N/A	#N/A	#N/A	down	1.77991e-06
Zjn_sc00018.1.g04810.1.am.mk	#N/A	#N/A	#N/A	down	2.97506e-23
Zjn_sc00018.1.g04940.1.sm.mk	Zjn_sc00018.1.g04940.1.sm.mk.mRNA	C2H2	TF	down	3.26077e-07
Zjn_sc00018.1.g04970.1.sm.mkhc	#N/A	#N/A	#N/A	down	8.6515e-11
Zjn_sc00018.1.g05220.1.am.mk	Zjn_sc00018.1.g05220.1.am.mk.mRNA	WRKY	TF	down	0.000239767
Zjn_sc00018.1.g05240.1.am.mk	#N/A	#N/A	#N/A	down	0.000593153
Zjn_sc00018.1.g05280.1.am.mk	Zjn_sc00018.1.g05280.1.am.mk.mRNA	RLK-Pelle_L-LEC	PK	up	3.88098e-07
Zjn_sc00018.1.g05560.1.sm.mkhc	#N/A	#N/A	#N/A	up	1.50414e-10
Zjn_sc00018.1.g05620.1.am.mkhc	#N/A	#N/A	#N/A	down	1.27736e-07
Zjn_sc00018.1.g06240.1.sm.mkhc	#N/A	#N/A	#N/A	up	1.58478e-05
Zjn_sc00018.1.g06300.1.sm.mk	#N/A	#N/A	#N/A	down	1.39291e-07
Zjn_sc00018.1.g06370.1.sm.mkhc	#N/A	#N/A	#N/A	down	2.84723e-05
Zjn_sc00018.1.g06710.1.am.mk	#N/A	#N/A	#N/A	down	1.09949e-07
Zjn_sc00018.1.g06750.1.sm.mk	Zjn_sc00018.1.g06750.1.sm.mk.mRNA	RLK-Pelle_LRR-III	PK	down	1.32846e-06
Zjn_sc00018.1.g06980.1.sm.mkhc	#N/A	#N/A	#N/A	down	5.94151e-08
Zjn_sc00018.1.g06990.1.sm.mk	PB.6617.1	SET	TR	down	6.75046e-08
Zjn_sc00018.1.g07010.1.am.mkhc	#N/A	#N/A	#N/A	down	0.00372008
Zjn_sc00018.1.g07020.1.am.mk	#N/A	#N/A	#N/A	down	9.14507e-07
Zjn_sc00018.1.g07050.1.am.mk	#N/A	#N/A	#N/A	up	7.56417e-06
Zjn_sc00018.1.g07120.1.am.mk	Zjn_sc00018.1.g07120.1.am.mk.mRNA	MYB	TF	down	2.53101e-08
Zjn_sc00018.1.g07210.1.am.mk	#N/A	#N/A	#N/A	down	0.00130904
Zjn_sc00018.1.g07280.1.sm.mk	Zjn_sc00018.1.g07280.1.sm.mk.mRNA	CAMK_CAMKL-CHK1	PK	down	6.93318e-06
Zjn_sc00018.1.g07580.1.sm.mk	#N/A	#N/A	#N/A	down	1.07074e-05
Zjn_sc00018.1.g07600.1.sm.mk	#N/A	#N/A	#N/A	down	6.56401e-07
Zjn_sc00018.1.g07680.1.am.mk	#N/A	#N/A	#N/A	up	0.000294092
Zjn_sc00019.1.g00030.1.am.mkhc	#N/A	#N/A	#N/A	down	5.13216e-05
Zjn_sc00019.1.g00100.1.sm.mkhc	#N/A	#N/A	#N/A	down	2.05266e-09
Zjn_sc00019.1.g00120.1.sm.mkhc	#N/A	#N/A	#N/A	up	0.000139676
Zjn_sc00019.1.g00270.1.am.mk	#N/A	#N/A	#N/A	down	1.18575e-07
Zjn_sc00019.1.g00550.1.sm.mkhc	#N/A	#N/A	#N/A	down	0.000163662
Zjn_sc00019.1.g00800.1.sm.mkhc	#N/A	#N/A	#N/A	down	6.30292e-31
Zjn_sc00019.1.g00820.1.am.mk	#N/A	#N/A	#N/A	down	0.00033265
Zjn_sc00019.1.g01000.1.sm.mk	#N/A	#N/A	#N/A	down	9.28699e-06
Zjn_sc00019.1.g01010.1.sm.mk	#N/A	#N/A	#N/A	down	0.00157964
Zjn_sc00019.1.g01440.1.sm.mkhc	#N/A	#N/A	#N/A	up	9.21126e-13
Zjn_sc00019.1.g01730.1.sm.mk	#N/A	#N/A	#N/A	up	3.3449e-11
Zjn_sc00019.1.g01740.1.am.mk	#N/A	#N/A	#N/A	up	2.21737e-08
Zjn_sc00019.1.g01750.1.am.mk	#N/A	#N/A	#N/A	up	4.52105e-08
Zjn_sc00019.1.g02120.1.am.mk	#N/A	#N/A	#N/A	down	0.00148498
Zjn_sc00019.1.g02350.1.am.mk	#N/A	#N/A	#N/A	up	0.00268234
Zjn_sc00019.1.g02930.1.am.mk	#N/A	#N/A	#N/A	down	0.000274628
Zjn_sc00019.1.g03180.1.am.mk	#N/A	#N/A	#N/A	down	8.90089e-14
Zjn_sc00019.1.g03410.1.sm.mkhc	PB.6731.1	NF-YA	TF	down	2.01188e-07
Zjn_sc00019.1.g03570.1.sm.mkhc	#N/A	#N/A	#N/A	up	3.54115e-05
Zjn_sc00019.1.g03580.1.sm.mkhc	#N/A	#N/A	#N/A	down	4.17787e-07
Zjn_sc00019.1.g03710.1.sm.mkhc	#N/A	#N/A	#N/A	up	2.03834e-05
Zjn_sc00019.1.g04020.1.sm.mkhc	#N/A	#N/A	#N/A	up	0.000478003
Zjn_sc00019.1.g04350.1.sm.mk	#N/A	#N/A	#N/A	down	6.70465e-05
Zjn_sc00020.1.g00030.1.sm.mkhc	#N/A	#N/A	#N/A	down	0.000461722
Zjn_sc00020.1.g00170.1.am.mk	#N/A	#N/A	#N/A	down	6.43221e-05
Zjn_sc00020.1.g00430.1.am.mkhc	#N/A	#N/A	#N/A	up	0.000205158
Zjn_sc00020.1.g00660.1.sm.mk	#N/A	#N/A	#N/A	down	0.00472407
Zjn_sc00020.1.g00810.1.sm.mkhc	#N/A	#N/A	#N/A	up	0.00977019
Zjn_sc00020.1.g00840.1.sm.mkhc	#N/A	#N/A	#N/A	down	0.000103254
Zjn_sc00020.1.g00850.1.sm.mkhc	PB.6794.3	Others	TR	down	9.91544e-15
Zjn_sc00020.1.g00900.1.es.mkhc	#N/A	#N/A	#N/A	up	2.61798e-12
Zjn_sc00020.1.g00930.1.sm.mk	#N/A	#N/A	#N/A	down	1.6199e-06
Zjn_sc00020.1.g01000.1.sm.mkhc	#N/A	#N/A	#N/A	up	8.35984e-15
Zjn_sc00020.1.g01020.1.am.mk	#N/A	#N/A	#N/A	down	4.80152e-16
Zjn_sc00020.1.g01140.1.sm.mkhc	#N/A	#N/A	#N/A	up	0.00278408
Zjn_sc00020.1.g01230.1.am.mk	#N/A	#N/A	#N/A	down	0.0080814
Zjn_sc00020.1.g01480.1.sm.mk	#N/A	#N/A	#N/A	up	0.00100384
Zjn_sc00020.1.g01580.1.sm.mkhc	#N/A	#N/A	#N/A	down	1.59882e-10
Zjn_sc00020.1.g01630.1.am.mk	#N/A	#N/A	#N/A	down	0.000377246
Zjn_sc00020.1.g01700.1.am.mk	#N/A	#N/A	#N/A	up	0.00277886
Zjn_sc00020.1.g01770.1.sm.mk	#N/A	#N/A	#N/A	up	0.0092634
Zjn_sc00020.1.g02030.1.sm.mk	#N/A	#N/A	#N/A	down	1.63526e-05
Zjn_sc00020.1.g02120.1.sm.mkhc	#N/A	#N/A	#N/A	down	7.049e-06
Zjn_sc00020.1.g02130.1.am.mkhc	#N/A	#N/A	#N/A	up	4.01893e-08
Zjn_sc00020.1.g02310.1.am.mk	#N/A	#N/A	#N/A	down	8.19168e-05
Zjn_sc00020.1.g02350.1.sm.mk	#N/A	#N/A	#N/A	down	6.02934e-13
Zjn_sc00020.1.g02490.1.sm.mkhc	#N/A	#N/A	#N/A	up	1.25725e-10
Zjn_sc00020.1.g02590.1.sm.mkhc	#N/A	#N/A	#N/A	up	0.00281678
Zjn_sc00020.1.g02810.1.am.mk	#N/A	#N/A	#N/A	down	5.70934e-05
Zjn_sc00020.1.g02870.1.am.mk	#N/A	#N/A	#N/A	up	0.000305387
Zjn_sc00020.1.g02920.1.sm.mkhc	#N/A	#N/A	#N/A	up	9.48034e-39
Zjn_sc00020.1.g03210.1.am.mk	#N/A	#N/A	#N/A	down	4.62143e-06
Zjn_sc00020.1.g03340.1.sm.mkhc	#N/A	#N/A	#N/A	up	1.39528e-05
Zjn_sc00020.1.g03610.1.sm.mk	#N/A	#N/A	#N/A	up	0.00166984
Zjn_sc00020.1.g03770.1.sm.mk	#N/A	#N/A	#N/A	down	0.000196831
Zjn_sc00020.1.g04210.1.sm.mkhc	#N/A	#N/A	#N/A	down	3.38499e-05
Zjn_sc00020.1.g04240.1.am.mkhc	#N/A	#N/A	#N/A	down	5.28396e-06
Zjn_sc00020.1.g04880.1.sm.mk	#N/A	#N/A	#N/A	down	0.000784885
Zjn_sc00020.1.g05030.1.sm.mkhc	#N/A	#N/A	#N/A	up	5.10261e-09
Zjn_sc00020.1.g05050.1.sm.mkhc	#N/A	#N/A	#N/A	up	4.97718e-07
Zjn_sc00020.1.g05230.1.sm.mk	#N/A	#N/A	#N/A	down	1.71396e-07
Zjn_sc00020.1.g05680.1.sm.mkhc	#N/A	#N/A	#N/A	down	0.000484869
Zjn_sc00020.1.g05690.1.am.mk	PB.6969.1	Others	TR	up	1.13104e-10
Zjn_sc00020.1.g05920.1.am.mkhc	#N/A	#N/A	#N/A	down	8.47927e-05
Zjn_sc00020.1.g06290.1.am.mk	#N/A	#N/A	#N/A	down	2.24629e-10
Zjn_sc00020.1.g06310.1.am.mk	#N/A	#N/A	#N/A	down	0.00474055
Zjn_sc00020.1.g06460.1.sm.mkhc	#N/A	#N/A	#N/A	up	4.69786e-05
Zjn_sc00021.1.g00010.1.sm.mk	#N/A	#N/A	#N/A	down	9.11705e-07
Zjn_sc00021.1.g00020.1.sm.mk	#N/A	#N/A	#N/A	down	0.00273926
Zjn_sc00021.1.g00670.1.sm.mkhc	#N/A	#N/A	#N/A	down	7.58998e-06
Zjn_sc00021.1.g00710.1.sm.mkhc	#N/A	#N/A	#N/A	down	7.29302e-13
Zjn_sc00021.1.g00840.1.sm.mk	#N/A	#N/A	#N/A	up	0.000204083
Zjn_sc00021.1.g00930.1.am.mk	#N/A	#N/A	#N/A	down	0.00929882
Zjn_sc00021.1.g01100.1.sm.mkhc	#N/A	#N/A	#N/A	up	9.29112e-15
Zjn_sc00021.1.g01110.1.am.mk	PB.7032.1	RLK-Pelle_CR4L	PK	down	0.00958615
Zjn_sc00021.1.g01480.1.sm.mkhc	#N/A	#N/A	#N/A	down	1.27443e-14
Zjn_sc00021.1.g01530.1.sm.mkhc	#N/A	#N/A	#N/A	up	3.40175e-13
Zjn_sc00021.1.g01770.1.am.mk	PB.7055.1	RLK-Pelle_LRR-IV	PK	up	2.14156e-11
Zjn_sc00021.1.g01970.1.sm.mkhc	#N/A	#N/A	#N/A	up	0.000102041
Zjn_sc00021.1.g02000.1.sm.mkhc	#N/A	#N/A	#N/A	up	0.00155624
Zjn_sc00021.1.g02080.1.sm.mkhc	#N/A	#N/A	#N/A	down	5.58431e-08
Zjn_sc00021.1.g02210.1.sm.mkhc	#N/A	#N/A	#N/A	down	7.95743e-12
Zjn_sc00022.1.g00020.1.am.mk	#N/A	#N/A	#N/A	up	0.000377791
Zjn_sc00022.1.g00140.1.sm.mkhc	#N/A	#N/A	#N/A	down	1.88678e-05
Zjn_sc00022.1.g00260.1.am.mk	#N/A	#N/A	#N/A	up	1.32995e-13
Zjn_sc00022.1.g00270.1.sm.mk	#N/A	#N/A	#N/A	up	1.33065e-15
Zjn_sc00022.1.g00330.1.sm.mkhc	#N/A	#N/A	#N/A	down	2.70016e-06
Zjn_sc00022.1.g00480.1.am.mkhc	#N/A	#N/A	#N/A	up	6.58556e-05
Zjn_sc00022.1.g00530.1.sm.mkhc	Zjn_sc00022.1.g00530.1.sm.mkhc.mRNA	bHLH	TF	up	2.7029e-11
Zjn_sc00022.1.g00690.1.am.mkhc	#N/A	#N/A	#N/A	up	1.86565e-16
Zjn_sc00022.1.g00710.1.sm.mkhc	#N/A	#N/A	#N/A	up	8.79622e-05
Zjn_sc00022.1.g00750.1.am.mkhc	#N/A	#N/A	#N/A	up	0.0018993
Zjn_sc00022.1.g00810.1.am.mkhc	#N/A	#N/A	#N/A	down	3.51645e-11
Zjn_sc00022.1.g00820.1.am.mkhc	#N/A	#N/A	#N/A	down	5.69547e-07
Zjn_sc00022.1.g00900.1.am.mk	#N/A	#N/A	#N/A	up	3.97624e-16
Zjn_sc00022.1.g01030.1.sm.mkhc	#N/A	#N/A	#N/A	down	1.77577e-05
Zjn_sc00022.1.g01070.1.sm.mk	#N/A	#N/A	#N/A	down	1.21643e-14
Zjn_sc00022.1.g01130.1.sm.mk	#N/A	#N/A	#N/A	down	1.07877e-07
Zjn_sc00022.1.g01240.1.es.mkhc	#N/A	#N/A	#N/A	up	2.25501e-10
Zjn_sc00022.1.g01410.1.sm.mkhc	#N/A	#N/A	#N/A	down	9.26891e-11
Zjn_sc00022.1.g01420.1.am.mkhc	#N/A	#N/A	#N/A	down	2.80011e-09
Zjn_sc00022.1.g01430.1.am.mk	#N/A	#N/A	#N/A	down	1.04728e-11
Zjn_sc00022.1.g01450.1.am.mk	#N/A	#N/A	#N/A	down	6.50508e-08
Zjn_sc00022.1.g01510.1.sm.mkhc	#N/A	#N/A	#N/A	down	5.73656e-09
Zjn_sc00022.1.g01590.1.am.mkhc	#N/A	#N/A	#N/A	down	0.00308501
Zjn_sc00022.1.g01850.1.am.mkhc	#N/A	#N/A	#N/A	down	7.10477e-08
Zjn_sc00022.1.g01880.1.am.mk	#N/A	#N/A	#N/A	up	2.8729e-06
Zjn_sc00022.1.g01920.1.sm.mkhc	PB.7150.1	Others	TR	up	0.00192307
Zjn_sc00022.1.g01940.1.sm.mk	#N/A	#N/A	#N/A	down	3.11221e-05
Zjn_sc00022.1.g02090.1.am.mkhc	#N/A	#N/A	#N/A	up	3.25615e-20
Zjn_sc00022.1.g02190.1.sm.mkhc	#N/A	#N/A	#N/A	up	3.35974e-09
Zjn_sc00022.1.g02240.1.sm.mkhc	#N/A	#N/A	#N/A	down	3.37864e-11
Zjn_sc00022.1.g02250.1.sm.mk	PB.7160.1	MYB	TF	down	6.58556e-05
Zjn_sc00022.1.g02280.1.sm.mkhc	#N/A	#N/A	#N/A	up	0.000399279
Zjn_sc00022.1.g02290.1.sm.mkhc	#N/A	#N/A	#N/A	up	0.000970647
Zjn_sc00022.1.g02500.1.sm.mkhc	PB.7167.1	HB-HD-ZIP	TF	up	2.25996e-08
Zjn_sc00022.1.g02510.1.am.mk	#N/A	#N/A	#N/A	up	3.7413e-11
Zjn_sc00022.1.g02600.1.am.mk	#N/A	#N/A	#N/A	down	0.00454643
Zjn_sc00022.1.g02660.1.sm.mkhc	#N/A	#N/A	#N/A	down	0.00124019
Zjn_sc00022.1.g02690.1.am.mkhc	PB.7171.1	SET	TR	down	1.64909e-13
Zjn_sc00022.1.g02710.1.am.mkhc	PB.7173.1	C2C2-CO-like	TF	up	9.21126e-13
Zjn_sc00022.1.g03030.1.am.mk	#N/A	#N/A	#N/A	up	3.73374e-09
Zjn_sc00022.1.g03110.1.am.mkhc	#N/A	#N/A	#N/A	up	3.08169e-16
Zjn_sc00022.1.g03360.1.sm.mkhc	PB.7200.2	RLK-Pelle_L-LEC	PK	up	0.000125825
Zjn_sc00022.1.g03420.1.sm.mk	#N/A	#N/A	#N/A	up	0.00359692
Zjn_sc00022.1.g03980.1.sm.mkhc	#N/A	#N/A	#N/A	down	6.26243e-09
Zjn_sc00022.1.g04100.1.sm.mkhc	#N/A	#N/A	#N/A	up	2.73411e-09
Zjn_sc00022.1.g04110.1.sm.mk	#N/A	#N/A	#N/A	up	1.44623e-08
Zjn_sc00022.1.g04280.1.am.mk	#N/A	#N/A	#N/A	down	3.94481e-14
Zjn_sc00022.1.g04400.1.am.mk	#N/A	#N/A	#N/A	up	0.000823686
Zjn_sc00022.1.g04410.1.sm.mkhc	#N/A	#N/A	#N/A	down	1.79102e-06
Zjn_sc00022.1.g04420.1.sm.mkhc	#N/A	#N/A	#N/A	down	0.00714198
Zjn_sc00022.1.g04460.1.am.mk	#N/A	#N/A	#N/A	down	2.08087e-05
Zjn_sc00022.1.g04480.1.sm.mkhc	#N/A	#N/A	#N/A	down	2.28725e-05
Zjn_sc00022.1.g04550.1.sm.mkhc	#N/A	#N/A	#N/A	down	0.000435859
Zjn_sc00022.1.g04590.1.sm.mkhc	#N/A	#N/A	#N/A	down	4.5251e-19
Zjn_sc00022.1.g04600.1.sm.mk	#N/A	#N/A	#N/A	down	1.58317e-06
Zjn_sc00022.1.g04610.1.sm.mk	#N/A	#N/A	#N/A	up	5.95684e-13
Zjn_sc00022.1.g04620.1.am.mk	#N/A	#N/A	#N/A	up	0.00202808
Zjn_sc00022.1.g04650.1.sm.mk	PB.7245.2	MYB-related	TF	up	0.000357015
Zjn_sc00022.1.g04670.1.sm.mkhc	#N/A	#N/A	#N/A	down	3.48115e-10
Zjn_sc00022.1.g04810.1.sm.mk	Zjn_sc00022.1.g04810.1.sm.mk.mRNA	PLATZ	TF	up	0.00354121
Zjn_sc00022.1.g04840.1.sm.mk	Zjn_sc00022.1.g04840.1.sm.mk.mRNA	bHLH	TF	down	0.00011359
Zjn_sc00022.1.g04960.1.sm.mk	#N/A	#N/A	#N/A	down	3.37903e-11
Zjn_sc00022.1.g05090.1.sm.mkhc	#N/A	#N/A	#N/A	up	9.80236e-13
Zjn_sc00022.1.g05100.1.sm.mk	#N/A	#N/A	#N/A	up	1.39482e-06
Zjn_sc00022.1.g05160.1.am.mk	#N/A	#N/A	#N/A	down	2.25998e-05
Zjn_sc00022.1.g05400.1.sm.mkhc	#N/A	#N/A	#N/A	down	1.59862e-05
Zjn_sc00022.1.g05580.1.sm.mk	#N/A	#N/A	#N/A	down	5.36968e-19
Zjn_sc00022.1.g05590.1.am.mk	PB.7279.1	AP2/ERF-ERF	TF	down	2.28729e-05
Zjn_sc00022.1.g05620.1.am.mk	PB.7280.2	AP2/ERF-ERF	TF	down	0.000379334
Zjn_sc00022.1.g05660.1.sm.mkhc	#N/A	#N/A	#N/A	up	1.56774e-08
Zjn_sc00022.1.g05680.1.am.mk	#N/A	#N/A	#N/A	down	0.000351026
Zjn_sc00022.1.g05890.1.am.mkhc	PB.7287.1	WNK_NRBP	PK	up	6.07727e-08
Zjn_sc00022.1.g06100.1.sm.mkhc	#N/A	#N/A	#N/A	down	0.000788556
Zjn_sc00022.1.g06120.1.am.mk	#N/A	#N/A	#N/A	down	0.00198965
Zjn_sc00022.1.g06180.1.am.mk	Zjn_sc00022.1.g06180.1.am.mk.mRNA	bZIP	TF	up	0.000129536
Zjn_sc00022.1.g06380.1.am.mk	#N/A	#N/A	#N/A	up	2.15012e-09
Zjn_sc00022.1.g06400.1.sm.mkhc	#N/A	#N/A	#N/A	down	8.81738e-09
Zjn_sc00022.1.g06530.1.sm.mk	#N/A	#N/A	#N/A	up	2.23033e-10
Zjn_sc00022.1.g06550.1.sm.mkhc	#N/A	#N/A	#N/A	up	1.3254e-05
Zjn_sc00022.1.g06720.1.sm.mkhc	#N/A	#N/A	#N/A	down	0.00434762
Zjn_sc00022.1.g06750.1.sm.mk	Zjn_sc00022.1.g06750.1.sm.mk.mRNA	AP2/ERF-ERF	TF	up	0.00595396
Zjn_sc00022.1.g06800.1.sm.mkhc	#N/A	#N/A	#N/A	down	0.00835036
Zjn_sc00022.1.g06910.1.sm.mkhc	#N/A	#N/A	#N/A	down	5.33342e-08
Zjn_sc00022.1.g07050.1.sm.mkhc	PB.7324.1	RLK-Pelle_RLCK-VIIa-2	PK	up	1.10413e-16
Zjn_sc00022.1.g07170.1.am.mk	#N/A	#N/A	#N/A	down	4.97073e-06
Zjn_sc00022.1.g07300.1.am.mk	#N/A	#N/A	#N/A	up	0.000206871
Zjn_sc00022.1.g07530.1.sm.mk	#N/A	#N/A	#N/A	down	1.75026e-08
Zjn_sc00022.1.g07630.1.sm.mk	#N/A	#N/A	#N/A	down	0.000438446
Zjn_sc00022.1.g07760.1.am.mk	#N/A	#N/A	#N/A	down	3.27933e-13
Zjn_sc00022.1.g07890.1.sm.mkhc	#N/A	#N/A	#N/A	down	3.14298e-05
Zjn_sc00022.1.g08010.1.am.mk	#N/A	#N/A	#N/A	down	0.000784885
Zjn_sc00022.1.g08140.1.am.mk	PB.7353.1	RLK-Pelle_LRR-Xb-1	PK	up	8.38019e-11
Zjn_sc00022.1.g08150.1.am.mkhc	#N/A	#N/A	#N/A	down	9.16775e-06
Zjn_sc00023.1.g00660.1.am.mk	#N/A	#N/A	#N/A	down	0.00284275
Zjn_sc00023.1.g00740.1.sm.mk	#N/A	#N/A	#N/A	down	0.00239199
Zjn_sc00023.1.g00950.1.am.mk	#N/A	#N/A	#N/A	down	4.03334e-19
Zjn_sc00023.1.g01080.1.sm.mk	#N/A	#N/A	#N/A	up	3.38351e-13
Zjn_sc00023.1.g01200.1.am.mk	#N/A	#N/A	#N/A	down	2.84292e-09
Zjn_sc00023.1.g01260.1.sm.mkhc	Zjn_sc00023.1.g01260.1.sm.mkhc.mRNA	MYB-related	TF	up	2.55496e-09
Zjn_sc00023.1.g01370.1.sm.mkhc	#N/A	#N/A	#N/A	down	1.0073e-14
Zjn_sc00023.1.g01400.1.sm.mkhc	#N/A	#N/A	#N/A	down	3.88569e-06
Zjn_sc00023.1.g01430.1.am.mkhc	#N/A	#N/A	#N/A	down	1.67594e-13
Zjn_sc00023.1.g01550.1.am.mkhc	#N/A	#N/A	#N/A	down	4.79864e-05
Zjn_sc00023.1.g01700.1.am.mkhc	#N/A	#N/A	#N/A	down	1.16793e-06
Zjn_sc00023.1.g01720.1.am.mk	#N/A	#N/A	#N/A	down	0.000264098
Zjn_sc00023.1.g01860.1.sm.mkhc	Zjn_sc00023.1.g01860.1.sm.mkhc.mRNA	MYB	TF	up	3.87523e-25
Zjn_sc00023.1.g01870.1.sm.mk	#N/A	#N/A	#N/A	up	2.97849e-05
Zjn_sc00023.1.g01980.1.am.mk	#N/A	#N/A	#N/A	down	0.000576473
Zjn_sc00023.1.g02290.1.am.mkhc	PB.7418.1	CMGC_DYRK-YAK	PK	up	4.85721e-13
Zjn_sc00023.1.g02330.1.sm.mkhc	#N/A	#N/A	#N/A	down	6.06369e-06
Zjn_sc00023.1.g02510.1.sm.mkhc	#N/A	#N/A	#N/A	down	2.06171e-21
Zjn_sc00023.1.g02830.1.sm.mkhc	#N/A	#N/A	#N/A	down	8.45817e-07
Zjn_sc00023.1.g02870.1.sm.mkhc	PB.7438.1	TKL_CTR1-DRK-2	PK	up	2.65909e-07
Zjn_sc00023.1.g02890.1.am.mk	#N/A	#N/A	#N/A	down	3.25763e-19
Zjn_sc00023.1.g02910.1.am.mkhc	#N/A	#N/A	#N/A	up	6.05374e-05
Zjn_sc00023.1.g02930.1.am.mk	#N/A	#N/A	#N/A	down	0.0050646
Zjn_sc00023.1.g02960.1.am.mk	#N/A	#N/A	#N/A	up	6.76065e-05
Zjn_sc00023.1.g03020.1.sm.mkhc	#N/A	#N/A	#N/A	up	4.26456e-08
Zjn_sc00023.1.g03040.1.am.mkhc	#N/A	#N/A	#N/A	up	2.74491e-12
Zjn_sc00023.1.g03120.1.sm.mkhc	#N/A	#N/A	#N/A	up	7.59971e-13
Zjn_sc00023.1.g03640.1.am.mkhc	#N/A	#N/A	#N/A	up	4.85768e-22
Zjn_sc00023.1.g03870.1.sm.mkhc	#N/A	#N/A	#N/A	down	5.42856e-06
Zjn_sc00023.1.g03920.1.am.mk	#N/A	#N/A	#N/A	down	1.79083e-10
Zjn_sc00023.1.g04200.1.am.mk	#N/A	#N/A	#N/A	up	0.00533071
Zjn_sc00023.1.g04390.1.am.mkhc	#N/A	#N/A	#N/A	down	4.62931e-05
Zjn_sc00023.1.g04580.1.am.mk	#N/A	#N/A	#N/A	up	8.96884e-15
Zjn_sc00023.1.g04620.1.am.mk	#N/A	#N/A	#N/A	up	0.00097471
Zjn_sc00023.1.g04810.1.sm.mkhc	#N/A	#N/A	#N/A	down	4.84488e-05
Zjn_sc00023.1.g04840.1.sm.mkhc	#N/A	#N/A	#N/A	up	3.57666e-18
Zjn_sc00023.1.g04930.1.sm.mk	#N/A	#N/A	#N/A	up	3.17143e-16
Zjn_sc00023.1.g05180.1.am.mk	#N/A	#N/A	#N/A	down	1.18903e-15
Zjn_sc00023.1.g05320.1.am.mk	#N/A	#N/A	#N/A	down	0.00407574
Zjn_sc00023.1.g05340.1.am.mk	#N/A	#N/A	#N/A	down	4.61526e-09
Zjn_sc00023.1.g05810.1.sm.mkhc	PB.7556.1	GARP-G2-like	TF	up	5.27664e-10
Zjn_sc00023.1.g05920.1.sm.mkhc	#N/A	#N/A	#N/A	down	1.0634e-12
Zjn_sc00023.1.g05960.1.sm.mkhc	#N/A	#N/A	#N/A	down	0.000713405
Zjn_sc00023.1.g05970.1.am.mkhc	#N/A	#N/A	#N/A	down	7.51387e-10
Zjn_sc00023.1.g05980.1.sm.mkhc	#N/A	#N/A	#N/A	down	5.73314e-09
Zjn_sc00023.1.g06010.1.sm.mk	Zjn_sc00023.1.g06010.1.sm.mk.mRNA	AP2/ERF-ERF	TF	down	1.04233e-08
Zjn_sc00023.1.g06160.1.am.mkhc	#N/A	#N/A	#N/A	down	0.00115494
Zjn_sc00023.1.g06660.1.am.mk	#N/A	#N/A	#N/A	up	0.00878504
Zjn_sc00023.1.g06690.1.am.mk	#N/A	#N/A	#N/A	up	1.03796e-08
Zjn_sc00023.1.g06920.1.am.mk	#N/A	#N/A	#N/A	down	6.46581e-21
Zjn_sc00023.1.g06970.1.sm.mkhc	#N/A	#N/A	#N/A	down	0.000132899
Zjn_sc00023.1.g07270.1.sm.mkhc	PB.7614.1	CAMK_OST1L	PK	down	2.02395e-06
Zjn_sc00024.1.g00270.1.am.mkhc	Zjn_sc00024.1.g00270.1.am.mkhc.mRNA	MYB	TF	up	0.000395359
Zjn_sc00024.1.g00540.1.sm.mk	#N/A	#N/A	#N/A	down	5.25031e-05
Zjn_sc00024.1.g00560.1.am.mk	#N/A	#N/A	#N/A	down	7.77395e-11
Zjn_sc00024.1.g00590.1.sm.mk	#N/A	#N/A	#N/A	down	0.00131429
Zjn_sc00024.1.g00910.1.am.mkhc	#N/A	#N/A	#N/A	up	8.79156e-10
Zjn_sc00024.1.g01480.1.am.mk	PB.7667.1	RLK-Pelle_CrRLK1L-1	PK	up	1.83427e-05
Zjn_sc00024.1.g01550.1.sm.mkhc	#N/A	#N/A	#N/A	down	2.00462e-11
Zjn_sc00024.1.g01780.1.sm.mk	#N/A	#N/A	#N/A	down	0.000427843
Zjn_sc00024.1.g02050.1.am.mk	#N/A	#N/A	#N/A	up	2.17594e-13
Zjn_sc00024.1.g02140.1.sm.mkhc	#N/A	#N/A	#N/A	up	1.11069e-05
Zjn_sc00024.1.g02230.1.am.mkhc	PB.7695.1	AUX/IAA	TR	down	2.01132e-16
Zjn_sc00024.1.g02440.1.am.mk	#N/A	#N/A	#N/A	up	1.8771e-06
Zjn_sc00024.1.g02490.1.sm.mkhc	#N/A	#N/A	#N/A	down	1.20564e-11
Zjn_sc00024.1.g02830.1.sm.mkhc	#N/A	#N/A	#N/A	down	3.23631e-06
Zjn_sc00024.1.g02880.1.sm.mk	Zjn_sc00024.1.g02880.1.sm.mk.mRNA	C3H	TF	down	0.00268603
Zjn_sc00024.1.g02890.1.am.mk	PB.7717.2	C3H	TF	down	0.00156982
Zjn_sc00025.1.g00700.1.am.mkhc	#N/A	#N/A	#N/A	up	3.66343e-05
Zjn_sc00025.1.g00720.1.sm.mkhc	#N/A	#N/A	#N/A	down	0.00092903
Zjn_sc00025.1.g01250.1.sm.mkhc	#N/A	#N/A	#N/A	down	8.81526e-14
Zjn_sc00025.1.g01280.1.sm.mkhc	#N/A	#N/A	#N/A	down	1.05555e-11
Zjn_sc00025.1.g01370.1.sm.mkhc	#N/A	#N/A	#N/A	up	5.65731e-07
Zjn_sc00025.1.g01380.1.am.mkhc	#N/A	#N/A	#N/A	down	5.2071e-19
Zjn_sc00025.1.g01560.1.am.mk	#N/A	#N/A	#N/A	down	8.63031e-13
Zjn_sc00025.1.g01810.1.am.mkhc	#N/A	#N/A	#N/A	down	1.65846e-06
Zjn_sc00025.1.g02000.1.sm.mk	#N/A	#N/A	#N/A	down	1.34265e-13
Zjn_sc00025.1.g02010.1.sm.mkhc	#N/A	#N/A	#N/A	down	1.59294e-15
Zjn_sc00025.1.g02270.1.am.mk	#N/A	#N/A	#N/A	up	0.000713282
Zjn_sc00025.1.g02310.1.sm.mkhc	#N/A	#N/A	#N/A	up	1.84027e-10
Zjn_sc00025.1.g02490.1.sm.mkhc	#N/A	#N/A	#N/A	up	2.73074e-13
Zjn_sc00025.1.g02660.1.sm.mkhc	#N/A	#N/A	#N/A	up	2.46453e-15
Zjn_sc00025.1.g02710.1.am.mkhc	#N/A	#N/A	#N/A	down	0.00121296
Zjn_sc00025.1.g02840.1.sm.mk	#N/A	#N/A	#N/A	up	0.00221421
Zjn_sc00025.1.g03090.1.sm.mkhc	#N/A	#N/A	#N/A	up	5.35058e-06
Zjn_sc00025.1.g03350.1.am.mk	Zjn_sc00025.1.g03350.1.am.mk.mRNA	C2H2	TF	down	4.94117e-05
Zjn_sc00025.1.g03370.1.am.mk	#N/A	#N/A	#N/A	down	6.7183e-05
Zjn_sc00025.1.g03490.1.am.mk	#N/A	#N/A	#N/A	up	2.37906e-07
[truncated: 2,039 more rows]

## Sheet: TFs_all
#Gene_ID	Trans_ID	Family	Type
Zjn_sc00040.1.g03140.1.sm.mkhc	PB.10002.2	Others	TR
Zjn_sc00040.1.g03480.1.sm.mkhc	PB.10014.1	HB-WOX	TF
Zjn_sc00040.1.g03480.1.sm.mkhc	PB.10014.2	HB-WOX	TF
Zjn_sc00002.1.g17080.1.sm.mkhc	PB.1002.1	Trihelix	TF
Zjn_sc00002.1.g17080.1.sm.mkhc	PB.1002.2	Trihelix	TF
Zjn_sc00040.1.g03940.1.am.mkhc	PB.10031.1	WRKY	TF
Zjn_sc00040.1.g03940.1.am.mkhc	PB.10031.2	WRKY	TF
Zjn_sc00040.1.g03940.1.am.mkhc	PB.10031.3	WRKY	TF
Zjn_sc00040.1.g03940.1.am.mkhc	PB.10031.4	WRKY	TF
Zjn_sc00002.1.g17120.1.sm.mkhc	PB.1005.1	SWI/SNF-BAF60b	TR
Zjn_sc00002.1.g17120.1.sm.mkhc	PB.1005.10	SWI/SNF-BAF60b	TR
Zjn_sc00002.1.g17120.1.sm.mkhc	PB.1005.3	SWI/SNF-BAF60b	TR
Zjn_sc00002.1.g17120.1.sm.mkhc	PB.1005.4	SWI/SNF-BAF60b	TR
Zjn_sc00002.1.g17120.1.sm.mkhc	PB.1005.7	SWI/SNF-BAF60b	TR
Zjn_sc00002.1.g17120.1.sm.mkhc	PB.1005.8	SWI/SNF-BAF60b	TR
Zjn_sc00002.1.g17120.1.sm.mkhc	PB.1005.9	SWI/SNF-BAF60b	TR
Zjn_sc00040.1.g04730.1.am.mk	PB.10063.1	C2H2	TF
Zjn_sc00040.1.g04940.1.cf.mkhc	PB.10067.1	GRAS	TF
Zjn_sc00040.1.g04940.1.cf.mkhc	PB.10067.2	GRAS	TF
Zjn_sc00040.1.g04940.1.cf.mkhc	PB.10067.3	GRAS	TF
Zjn_sc00040.1.g04940.1.cf.mkhc	PB.10067.4	GRAS	TF
Zjn_sc00040.1.g04940.1.cf.mkhc	PB.10067.5	GRAS	TF
Zjn_sc00040.1.g05220.1.sm.mkhc	PB.10080.2	HB-BELL	TF
Zjn_sc00040.1.g05390.1.sm.mk	PB.10086.1	MYB	TF
Zjn_sc00040.1.g05390.1.sm.mk	PB.10086.2	MYB	TF
Zjn_sc00001.1.g02340.1.sm.mkhc	PB.101.2	SNF2	TR
Zjn_sc00041.1.g01640.1.sm.mkhc	PB.10150.1	C2H2	TF
Zjn_sc00041.1.g01640.1.sm.mkhc	PB.10150.10	C2H2	TF
Zjn_sc00041.1.g01640.1.sm.mkhc	PB.10150.11	C2H2	TF
Zjn_sc00041.1.g01640.1.sm.mkhc	PB.10150.2	C2H2	TF
Zjn_sc00041.1.g01640.1.sm.mkhc	PB.10150.3	C2H2	TF
Zjn_sc00041.1.g01640.1.sm.mkhc	PB.10150.4	C2H2	TF
Zjn_sc00041.1.g01640.1.sm.mkhc	PB.10150.6	C2H2	TF
Zjn_sc00041.1.g01640.1.sm.mkhc	PB.10150.7	C2H2	TF
Zjn_sc00041.1.g01640.1.sm.mkhc	PB.10150.9	C2H2	TF
Zjn_sc00041.1.g01710.1.sm.mkhc	PB.10155.1	mTERF	TR
Zjn_sc00041.1.g01710.1.sm.mkhc	PB.10155.2	mTERF	TR
Zjn_sc00041.1.g01760.1.am.mk	PB.10157.1	Trihelix	TF
Zjn_sc00041.1.g01760.1.am.mk	PB.10157.2	Trihelix	TF
Zjn_sc00041.1.g01850.1.sm.mkhc	PB.10160.1	SET	TR
Zjn_sc00041.1.g01910.1.sm.mkhc	PB.10162.1	C2H2	TF
Zjn_sc00041.1.g01930.1.sm.mk	PB.10162.2	C2H2	TF
Zjn_sc00041.1.g01930.1.sm.mk	PB.10162.3	C2H2	TF
Zjn_sc00041.1.g01910.1.sm.mkhc	PB.10162.4	C2H2	TF
Zjn_sc00041.1.g01910.1.sm.mkhc	PB.10162.5	C2H2	TF
Zjn_sc00041.1.g01930.1.sm.mk	PB.10162.6	C2H2	TF
Zjn_sc00041.1.g02430.1.sm.mkhc	PB.10177.1	RWP-RK	TF
Zjn_sc00041.1.g02430.1.sm.mkhc	PB.10177.2	RWP-RK	TF
Zjn_sc00041.1.g02430.1.sm.mkhc	PB.10177.3	RWP-RK	TF
Zjn_sc00042.1.g00090.1.am.mkhc	PB.10184.1	ARID	TR
Zjn_sc00042.1.g00090.1.am.mkhc	PB.10184.2	ARID	TR
Zjn_sc00042.1.g00090.1.am.mkhc	PB.10184.3	ARID	TR
Zjn_sc00042.1.g00630.1.am.mkhc	PB.10193.1	Others	TR
Zjn_sc00042.1.g01600.1.sm.mk	PB.10217.1	SNF2	TR
Zjn_sc00042.1.g01600.1.sm.mk	PB.10217.2	SNF2	TR
Zjn_sc00043.1.g00110.1.am.mk	PB.10232.1	MYB	TF
Zjn_sc00043.1.g00820.1.am.mkhc	PB.10257.1	Others	TR
Zjn_sc00043.1.g00820.1.am.mkhc	PB.10257.10	Others	TR
Zjn_sc00043.1.g00820.1.am.mkhc	PB.10257.11	Others	TR
Zjn_sc00043.1.g00820.1.am.mkhc	PB.10257.12	Others	TR
Zjn_sc00043.1.g00820.1.am.mkhc	PB.10257.2	Others	TR
Zjn_sc00043.1.g00820.1.am.mkhc	PB.10257.3	Others	TR
Zjn_sc00043.1.g00820.1.am.mkhc	PB.10257.4	Others	TR
Zjn_sc00043.1.g00820.1.am.mkhc	PB.10257.5	Others	TR
Zjn_sc00043.1.g00820.1.am.mkhc	PB.10257.7	Others	TR
Zjn_sc00043.1.g00820.1.am.mkhc	PB.10257.8	Others	TR
Zjn_sc00043.1.g01650.1.sm.mk	PB.10291.2	C3H	TF
Zjn_sc00043.1.g01930.1.am.mkhc	PB.10304.1	C3H	TF
Zjn_sc00043.1.g01930.1.am.mkhc	PB.10304.2	C3H	TF
Zjn_sc00002.1.g17570.1.sm.mkhc	PB.1031.3	SNF2	TR
Zjn_sc00002.1.g17570.1.sm.mkhc	PB.1031.4	SNF2	TR
Zjn_sc00043.1.g02140.1.am.mkhc	PB.10313.1	NAC	TF
Zjn_sc00043.1.g02240.1.sm.mkhc	PB.10318.1	C2C2-Dof	TF
Zjn_sc00043.1.g03080.1.sm.mkhc	PB.10347.1	SNF2	TR
Zjn_sc00043.1.g03080.1.sm.mkhc	PB.10347.2	SNF2	TR
Zjn_sc00043.1.g03080.1.sm.mkhc	PB.10347.5	SNF2	TR
Zjn_sc00043.1.g03080.1.sm.mkhc	PB.10347.6	SNF2	TR
Zjn_sc00043.1.g03540.1.sm.mkhc	PB.10363.1	BES1	TF
Zjn_sc00043.1.g03870.1.am.mk	PB.10378.1	TCP	TF
Zjn_sc00043.1.g03870.1.am.mk	PB.10378.2	TCP	TF
Zjn_sc00043.1.g04040.1.am.mk	PB.10383.1	bHLH	TF
Zjn_sc00043.1.g04090.1.sm.mkhc	PB.10385.1	PHD	TR
Zjn_sc00043.1.g04090.1.sm.mkhc	PB.10385.2	PHD	TR
Zjn_sc00043.1.g04090.1.sm.mkhc	PB.10385.3	PHD	TR
Zjn_sc00043.1.g04090.1.sm.mkhc	PB.10385.4	PHD	TR
Zjn_sc00043.1.g04630.1.sm.mk	PB.10409.1	MYB	TF
Zjn_sc00043.1.g04650.1.am.mkhc	PB.10409.2	MYB	TF
Zjn_sc00043.1.g04630.1.sm.mk	PB.10409.4	MYB	TF
Zjn_sc00043.1.g04630.1.sm.mk	PB.10409.5	MYB-related	TF
Zjn_sc00043.1.g04900.1.sm.mkhc	PB.10421.1	B3-ARF	TF
Zjn_sc00043.1.g04920.1.sm.mkhc	PB.10422.1	RWP-RK	TF
Zjn_sc00043.1.g04920.1.sm.mkhc	PB.10422.3	RWP-RK	TF
Zjn_sc00043.1.g05000.1.sm.mk	PB.10425.2	GARP-G2-like	TF
Zjn_sc00043.1.g05000.1.sm.mk	PB.10425.4	GARP-G2-like	TF
Zjn_sc00043.1.g05100.1.am.mk	PB.10430.1	WRKY	TF
Zjn_sc00043.1.g05100.1.am.mk	PB.10430.2	WRKY	TF
Zjn_sc00044.1.g00040.1.sm.mkhc	PB.10433.1	mTERF	TR
Zjn_sc00044.1.g00060.1.sm.mkhc	PB.10434.1	GRAS	TF
Zjn_sc00044.1.g00070.1.am.mkhc	PB.10435.1	WRKY	TF
Zjn_sc00044.1.g00400.1.sm.mk	PB.10446.3	GRAS	TF
Zjn_sc00044.1.g01710.1.sm.mkhc	PB.10475.1	Tify	TF
Zjn_sc00044.1.g01710.1.sm.mkhc	PB.10475.2	Tify	TF
Zjn_sc00044.1.g02180.1.sm.mkhc	PB.10490.4	CAMTA	TF
Zjn_sc00044.1.g02640.1.sm.mkhc	PB.10502.1	MYB-related	TF
Zjn_sc00044.1.g02960.1.am.mk	PB.10512.1	MYB	TF
Zjn_sc00044.1.g03080.1.sm.mk	PB.10518.1	GeBP	TF
Zjn_sc00003.1.g00570.1.sm.mkhc	PB.1052.1	TUB	TF
Zjn_sc00044.1.g03340.1.am.mk	PB.10525.1	HSF	TF
Zjn_sc00044.1.g04030.1.sm.mkhc	PB.10550.1	SNF2	TR
Zjn_sc00044.1.g04030.1.sm.mkhc	PB.10550.10	SNF2	TR
Zjn_sc00044.1.g04030.1.sm.mkhc	PB.10550.11	SNF2	TR
Zjn_sc00044.1.g04030.1.sm.mkhc	PB.10550.12	SNF2	TR
Zjn_sc00044.1.g04030.1.sm.mkhc	PB.10550.2	SNF2	TR
Zjn_sc00044.1.g04030.1.sm.mkhc	PB.10550.3	SNF2	TR
Zjn_sc00044.1.g04030.1.sm.mkhc	PB.10550.4	SNF2	TR
Zjn_sc00044.1.g04030.1.sm.mkhc	PB.10550.5	SNF2	TR
Zjn_sc00044.1.g04030.1.sm.mkhc	PB.10550.6	SNF2	TR
Zjn_sc00044.1.g04030.1.sm.mkhc	PB.10550.7	SNF2	TR
Zjn_sc00044.1.g04030.1.sm.mkhc	PB.10550.9	SNF2	TR
Zjn_sc00044.1.g04100.1.am.mkhc	PB.10555.1	DDT	TR
Zjn_sc00044.1.g04100.1.am.mkhc	PB.10555.2	DDT	TR
Zjn_sc00044.1.g04100.1.am.mkhc	PB.10555.3	PHD	TR
Zjn_sc00044.1.g04100.1.am.mkhc	PB.10555.4	DDT	TR
Zjn_sc00044.1.g04100.1.am.mkhc	PB.10555.5	DDT	TR
Zjn_sc00044.1.g04220.1.am.mkhc	PB.10562.1	TUB	TF
Zjn_sc00044.1.g04730.1.sm.mkhc	PB.10592.1	B3	TF
Zjn_sc00044.1.g04730.1.sm.mkhc	PB.10592.2	B3	TF
Zjn_sc00044.1.g04730.1.sm.mkhc	PB.10592.4	B3	TF
Zjn_sc00044.1.g04730.1.sm.mkhc	PB.10592.5	B3	TF
Zjn_sc00044.1.g04960.1.sm.mk	PB.10604.10	NAC	TF
Zjn_sc00044.1.g04960.1.sm.mk	PB.10604.2	NAC	TF
Zjn_sc00044.1.g04960.1.sm.mk	PB.10604.4	NAC	TF
Zjn_sc00044.1.g04960.1.sm.mk	PB.10604.5	NAC	TF
Zjn_sc00044.1.g04960.1.sm.mk	PB.10604.6	NAC	TF
Zjn_sc00044.1.g05020.1.sm.mkhc	PB.10607.2	NAC	TF
Zjn_sc00044.1.g05020.1.sm.mkhc	PB.10607.3	NAC	TF
Zjn_sc00044.1.g05060.1.sm.mkhc	PB.10608.1	C2C2-Dof	TF
Zjn_sc00044.1.g05060.1.sm.mkhc	PB.10608.2	C2C2-Dof	TF
Zjn_sc00045.1.g01190.1.am.mk	PB.10671.1	AP2/ERF-ERF	TF
Zjn_sc00045.1.g02530.1.sm.mkhc	PB.10699.23	GARP-ARR-B	TF
Zjn_sc00045.1.g02460.1.sm.mkhc	PB.10708.1	HB-KNOX	TF
Zjn_sc00045.1.g02590.1.am.mkhc	PB.10709.4	WRKY	TF
Zjn_sc00045.1.g02780.1.am.mk	PB.10716.1	Others	TR
Zjn_sc00045.1.g02780.1.am.mk	PB.10716.2	Others	TR
Zjn_sc00045.1.g02980.1.sm.mkhc	PB.10724.1	bZIP	TF
Zjn_sc00045.1.g02980.1.sm.mkhc	PB.10724.2	bZIP	TF
Zjn_sc00045.1.g03050.1.am.mk	PB.10726.1	GARP-G2-like	TF
Zjn_sc00045.1.g03490.1.am.mkhc	PB.10742.1	B3-ARF	TF
Zjn_sc00045.1.g03640.1.sm.mkhc	PB.10746.1	C3H	TF
Zjn_sc00045.1.g03640.1.sm.mkhc	PB.10746.2	C3H	TF
Zjn_sc00045.1.g03640.1.sm.mkhc	PB.10746.3	C3H	TF
Zjn_sc00045.1.g03640.1.sm.mkhc	PB.10746.4	C3H	TF
Zjn_sc00045.1.g03640.1.sm.mkhc	PB.10746.6	C3H	TF
Zjn_sc00045.1.g03820.1.am.mkhc	PB.10754.1	Whirly	TF
Zjn_sc00045.1.g03870.1.sm.mk	PB.10756.1	AP2/ERF-ERF	TF
Zjn_sc00045.1.g04100.1.sm.mkhc	PB.10767.1	HB-PHD	TF
Zjn_sc00045.1.g04180.1.sm.mk	PB.10770.1	B3-ARF	TF
Zjn_sc00045.1.g04180.1.sm.mk	PB.10770.3	B3-ARF	TF
Zjn_sc00045.1.g04180.1.sm.mk	PB.10770.4	B3-ARF	TF
Zjn_sc00045.1.g04180.1.sm.mk	PB.10770.5	B3-ARF	TF
Zjn_sc00045.1.g04180.1.sm.mk	PB.10770.6	AUX/IAA	TR
Zjn_sc00045.1.g04370.1.sm.mkhc	PB.10780.1	TAZ	TR
Zjn_sc00045.1.g04370.1.sm.mkhc	PB.10780.2	TAZ	TR
Zjn_sc00047.1.g00140.1.sm.mkhc	PB.10843.1	MYB-related	TF
Zjn_sc00003.1.g01520.1.am.mkhc	PB.1086.1	GARP-G2-like	TF
Zjn_sc00003.1.g01520.1.am.mkhc	PB.1086.2	GARP-G2-like	TF
Zjn_sc00047.1.g01590.1.sm.mkhc	PB.10892.1	C3H	TF
Zjn_sc00001.1.g02680.1.am.mkhc	PB.109.1	SNF2	TR
Zjn_sc00001.1.g02680.1.am.mkhc	PB.109.2	SNF2	TR
Zjn_sc00001.1.g02680.1.am.mkhc	PB.109.4	SNF2	TR
Zjn_sc00003.1.g01650.1.sm.mkhc	PB.1090.2	C3H	TF
Zjn_sc00003.1.g01650.1.sm.mkhc	PB.1090.5	C3H	TF
Zjn_sc00003.1.g01650.1.sm.mkhc	PB.1090.6	C3H	TF
Zjn_sc00003.1.g01750.1.sm.mkhc	PB.1093.1	NAC	TF
Zjn_sc00003.1.g01750.1.sm.mkhc	PB.1093.3	NAC	TF
Zjn_sc00047.1.g02810.1.sm.mkhc	PB.10938.1	bHLH	TF
Zjn_sc00047.1.g03670.1.sm.mkhc	PB.10965.11	Trihelix	TF
Zjn_sc00047.1.g03670.1.sm.mkhc	PB.10965.12	Trihelix	TF
Zjn_sc00003.1.g01960.1.cf.mkhc	PB.1099.3	EIL	TF
Zjn_sc00003.1.g01950.1.sm.mk	PB.1099.5	EIL	TF
Zjn_sc00049.1.g00150.1.am.mk	PB.11012.1	HB-HD-ZIP	TF
Zjn_sc00049.1.g00500.1.sm.mk	PB.11022.1	Whirly	TF
PB.11031	PB.11031.1	DBB	TF
Zjn_sc00049.1.g01220.1.sm.mkhc	PB.11046.1	MADS-MIKC	TF
Zjn_sc00049.1.g02030.1.am.mkhc	PB.11074.1	Others	TR
Zjn_sc00049.1.g02030.1.am.mkhc	PB.11074.2	Others	TR
Zjn_sc00049.1.g02130.1.sm.mkhc	PB.11076.1	PHD	TR
Zjn_sc00049.1.g02130.1.sm.mkhc	PB.11076.3	SNF2	TR
Zjn_sc00049.1.g02130.1.sm.mkhc	PB.11076.4	SNF2	TR
Zjn_sc00049.1.g02130.1.sm.mkhc	PB.11076.5	PHD	TR
Zjn_sc00049.1.g02140.1.am.mk	PB.11077.1	bHLH	TF
Zjn_sc00003.1.g02270.1.sm.mkhc	PB.1109.1	bZIP	TF
Zjn_sc00003.1.g02270.1.sm.mkhc	PB.1109.2	bZIP	TF
Zjn_sc00003.1.g02270.1.sm.mkhc	PB.1109.3	bZIP	TF
Zjn_sc00049.1.g02790.1.sm.mkhc	PB.11100.1	bHLH	TF
Zjn_sc00049.1.g03190.1.am.mk	PB.11114.1	GRF	TF
Zjn_sc00049.1.g03950.1.am.mkhc	PB.11140.2	MADS-MIKC	TF
Zjn_sc00049.1.g04190.1.am.mk	PB.11145.1	AP2/ERF-ERF	TF
Zjn_sc00050.1.g01060.1.sm.mkhc	PB.11203.2	Others	TR
Zjn_sc00050.1.g01060.1.sm.mkhc	PB.11203.3	Pseudo ARR-B	TR
Zjn_sc00050.1.g01060.1.sm.mkhc	PB.11203.4	Others	TR
Zjn_sc00050.1.g01060.1.sm.mkhc	PB.11203.5	Pseudo ARR-B	TR
Zjn_sc00050.1.g01060.1.sm.mkhc	PB.11203.6	Pseudo ARR-B	TR
Zjn_sc00050.1.g01060.1.sm.mkhc	PB.11203.7	Others	TR
Zjn_sc00050.1.g01280.1.am.mkhc	PB.11208.1	SWI/SNF-BAF60b	TR
Zjn_sc00050.1.g01330.1.sm.mkhc	PB.11210.1	DBB	TF
Zjn_sc00050.1.g01330.1.sm.mkhc	PB.11210.2	Others	TR
Zjn_sc00050.1.g01640.1.am.mk	PB.11216.1	HB-HD-ZIP	TF
Zjn_sc00050.1.g01640.1.am.mk	PB.11216.10	HB-HD-ZIP	TF
Zjn_sc00050.1.g01640.1.am.mk	PB.11216.2	HB-HD-ZIP	TF
Zjn_sc00050.1.g01640.1.am.mk	PB.11216.3	HB-HD-ZIP	TF
Zjn_sc00050.1.g01640.1.am.mk	PB.11216.4	HB-HD-ZIP	TF
Zjn_sc00050.1.g01640.1.am.mk	PB.11216.5	HB-HD-ZIP	TF
Zjn_sc00050.1.g01640.1.am.mk	PB.11216.7	HB-HD-ZIP	TF
Zjn_sc00050.1.g01640.1.am.mk	PB.11216.9	HB-HD-ZIP	TF
Zjn_sc00050.1.g01870.1.am.mk	PB.11222.1	AP2/ERF-ERF	TF
Zjn_sc00050.1.g02180.1.am.mk	PB.11234.1	bZIP	TF
Zjn_sc00050.1.g02490.1.sm.mk	PB.11246.1	MADS-M-type	TF
Zjn_sc00050.1.g03060.1.sm.mkhc	PB.11271.1	GARP-G2-like	TF
Zjn_sc00050.1.g03340.1.sm.mkhc	PB.11275.1	HB-other	TF
Zjn_sc00003.1.g02750.1.sm.mkhc	PB.1130.1	SET	TR
Zjn_sc00003.1.g02750.1.sm.mkhc	PB.1130.2	SET	TR
Zjn_sc00003.1.g02750.1.sm.mkhc	PB.1130.3	SET	TR
Zjn_sc00051.1.g01000.1.am.mkhc	PB.11308.1	AUX/IAA	TR
Zjn_sc00051.1.g01180.1.sm.mkhc	PB.11314.1	HSF	TF
Zjn_sc00051.1.g01180.1.sm.mkhc	PB.11314.2	HSF	TF
Zjn_sc00051.1.g01620.1.sm.mkhc	PB.11326.1	TRAF	TR
Zjn_sc00051.1.g01620.1.sm.mkhc	PB.11326.2	TRAF	TR
Zjn_sc00051.1.g01620.1.sm.mkhc	PB.11326.3	TRAF	TR
Zjn_sc00051.1.g01620.1.sm.mkhc	PB.11326.4	TRAF	TR
Zjn_sc00051.1.g01880.1.am.mk	PB.11338.1	C2C2-YABBY	TF
Zjn_sc00003.1.g02820.1.am.mk	PB.1134.1	bZIP	TF
Zjn_sc00051.1.g02330.1.am.mkhc	PB.11350.1	Rcd1-like	TR
Zjn_sc00051.1.g02330.1.am.mkhc	PB.11350.2	Rcd1-like	TR
Zjn_sc00003.1.g02900.1.am.mkhc	PB.1136.1	SET	TR
Zjn_sc00003.1.g02900.1.am.mkhc	PB.1136.10	SET	TR
Zjn_sc00003.1.g02900.1.am.mkhc	PB.1136.11	SET	TR
Zjn_sc00003.1.g02900.1.am.mkhc	PB.1136.2	SET	TR
Zjn_sc00003.1.g02900.1.am.mkhc	PB.1136.3	SET	TR
Zjn_sc00003.1.g02900.1.am.mkhc	PB.1136.4	SET	TR
Zjn_sc00003.1.g02900.1.am.mkhc	PB.1136.5	SET	TR
Zjn_sc00003.1.g02900.1.am.mkhc	PB.1136.7	SET	TR
Zjn_sc00003.1.g02900.1.am.mkhc	PB.1136.8	SET	TR
Zjn_sc00003.1.g02900.1.am.mkhc	PB.1136.9	SET	TR
Zjn_sc00051.1.g02970.1.sm.mkhc	PB.11369.1	GARP-G2-like	TF
Zjn_sc00052.1.g01150.1.am.mkhc	PB.11399.1	C3H	TF
Zjn_sc00052.1.g01150.1.am.mkhc	PB.11399.2	C3H	TF
Zjn_sc00052.1.g01150.1.am.mkhc	PB.11399.3	C3H	TF
Zjn_sc00003.1.g03010.1.sm.mkhc	PB.1140.1	PHD	TR
Zjn_sc00003.1.g03110.1.am.mkhc	PB.1141.1	PHD	TR
Zjn_sc00003.1.g03110.1.am.mkhc	PB.1141.2	PHD	TR
Zjn_sc00003.1.g03110.1.am.mkhc	PB.1141.3	PHD	TR
Zjn_sc00003.1.g03110.1.am.mkhc	PB.1141.4	PHD	TR
Zjn_sc00053.1.g00570.1.am.mk	PB.11433.1	OFP	TF
Zjn_sc00053.1.g00700.1.am.mk	PB.11440.1	MADS-M-type	TF
Zjn_sc00053.1.g00720.1.am.mkhc	PB.11440.2	MADS-MIKC	TF
Zjn_sc00053.1.g00700.1.am.mk	PB.11440.3	MADS-M-type	TF
Zjn_sc00053.1.g00700.1.am.mk	PB.11440.4	MADS-M-type	TF
Zjn_sc00053.1.g00700.1.am.mk	PB.11440.5	MADS-M-type	TF
Zjn_sc00053.1.g01600.1.sm.mk	PB.11471.2	GRAS	TF
Zjn_sc00053.1.g02030.1.am.mk	PB.11484.1	bHLH	TF
Zjn_sc00053.1.g02030.1.am.mk	PB.11484.11	bHLH	TF
Zjn_sc00053.1.g02030.1.am.mk	PB.11484.14	bHLH	TF
Zjn_sc00053.1.g02030.1.am.mk	PB.11484.15	bHLH	TF
Zjn_sc00053.1.g02030.1.am.mk	PB.11484.17	bHLH	TF
Zjn_sc00053.1.g02030.1.am.mk	PB.11484.18	bHLH	TF
Zjn_sc00053.1.g02030.1.am.mk	PB.11484.21	bHLH	TF
Zjn_sc00053.1.g02030.1.am.mk	PB.11484.22	bHLH	TF
Zjn_sc00053.1.g02030.1.am.mk	PB.11484.7	bHLH	TF
Zjn_sc00053.1.g02030.1.am.mk	PB.11484.9	bHLH	TF
Zjn_sc00053.1.g02230.1.am.mk	PB.11492.1	AP2/ERF-ERF	TF
Zjn_sc00053.1.g02370.1.sm.mkhc	PB.11495.1	MYB-related	TF
Zjn_sc00053.1.g02370.1.sm.mkhc	PB.11495.2	MYB-related	TF
Zjn_sc00053.1.g02520.1.am.mk	PB.11500.1	AP2/ERF-ERF	TF
Zjn_sc00053.1.g02520.1.am.mk	PB.11500.2	AP2/ERF-ERF	TF
Zjn_sc00053.1.g02600.1.sm.mkhc	PB.11503.1	MYB-related	TF
Zjn_sc00053.1.g02990.1.sm.mkhc	PB.11519.1	STAT	TF
Zjn_sc00055.1.g00650.1.sm.mkhc	PB.11566.2	NAC	TF
Zjn_sc00056.1.g00800.1.sm.mkhc	PB.11611.1	Trihelix	TF
Zjn_sc00056.1.g01120.1.am.mk	PB.11627.1	Others	TR
Zjn_sc00056.1.g01120.1.am.mk	PB.11627.2	Others	TR
Zjn_sc00056.1.g01120.1.am.mk	PB.11627.4	DBB	TF
Zjn_sc00056.1.g01280.1.sm.mkhc	PB.11629.1	RWP-RK	TF
Zjn_sc00056.1.g01280.1.sm.mkhc	PB.11629.3	RWP-RK	TF
Zjn_sc00056.1.g01280.1.sm.mkhc	PB.11629.4	RWP-RK	TF
Zjn_sc00056.1.g01280.1.sm.mkhc	PB.11629.5	RWP-RK	TF
Zjn_sc00056.1.g01280.1.sm.mkhc	PB.11629.6	RWP-RK	TF
Zjn_sc00056.1.g01280.1.sm.mkhc	PB.11629.7	RWP-RK	TF
Zjn_sc00056.1.g02530.1.am.mk	PB.11673.1	B3-ARF	TF
Zjn_sc00056.1.g03330.1.am.mk	PB.11705.1	MYB	TF
Zjn_sc00056.1.g03620.1.am.mk	PB.11716.1	C2C2-GATA	TF
Zjn_sc00056.1.g03620.1.am.mk	PB.11716.2	C2C2-GATA	TF
Zjn_sc00056.1.g03620.1.am.mk	PB.11716.3	C2C2-GATA	TF
Zjn_sc00056.1.g03660.1.am.mk	PB.11719.1	Trihelix	TF
Zjn_sc00056.1.g03700.1.sm.mk	PB.11721.1	HB-HD-ZIP	TF
Zjn_sc00056.1.g03860.1.am.mkhc	PB.11731.1	C2C2-GATA	TF
Zjn_sc00056.1.g04020.1.am.mk	PB.11735.3	AP2/ERF-ERF	TF
Zjn_sc00056.1.g04250.1.am.mk	PB.11739.1	AP2/ERF-ERF	TF
Zjn_sc00056.1.g04480.1.sm.mk	PB.11742.1	GRAS	TF
Zjn_sc00056.1.g04480.1.sm.mk	PB.11742.2	GRAS	TF
Zjn_sc00056.1.g04480.1.sm.mk	PB.11742.3	GRAS	TF
Zjn_sc00056.1.g04480.1.sm.mk	PB.11742.4	GRAS	TF
Zjn_sc00056.1.g04480.1.sm.mk	PB.11742.5	GRAS	TF
Zjn_sc00057.1.g00250.1.am.mk	PB.11760.1	C2H2	TF
Zjn_sc00057.1.g00250.1.am.mk	PB.11760.2	C2H2	TF
Zjn_sc00058.1.g00770.1.sm.mkhc	PB.11827.1	MADS-M-type	TF
Zjn_sc00058.1.g00810.1.am.mk	PB.11829.1	NAC	TF
Zjn_sc00058.1.g01640.1.sm.mk	PB.11864.1	Trihelix	TF
Zjn_sc00058.1.g01990.1.am.mk	PB.11874.1	Others	TR
Zjn_sc00058.1.g02020.1.sm.mkhc	PB.11876.1	B3-ARF	TF
Zjn_sc00058.1.g02020.1.sm.mkhc	PB.11876.2	B3-ARF	TF
Zjn_sc00058.1.g02020.1.sm.mkhc	PB.11876.3	B3-ARF	TF
Zjn_sc00058.1.g02020.1.sm.mkhc	PB.11876.4	B3-ARF	TF
Zjn_sc00058.1.g02170.1.am.mkhc	PB.11883.1	C3H	TF
Zjn_sc00058.1.g02170.1.am.mkhc	PB.11883.2	C3H	TF
Zjn_sc00058.1.g02170.1.am.mkhc	PB.11883.3	C3H	TF
Zjn_sc00058.1.g02240.1.sm.mkhc	PB.11885.1	NAC	TF
Zjn_sc00058.1.g02240.1.sm.mkhc	PB.11885.2	NAC	TF
Zjn_sc00058.1.g02370.1.sm.mk	PB.11892.1	zf-HD	TF
Zjn_sc00001.1.g02990.1.am.mk	PB.119.1	MYB	TF
Zjn_sc00058.1.g02760.1.sm.mkhc	PB.11907.1	SET	TR
Zjn_sc00058.1.g02980.1.am.mkhc	PB.11913.1	FAR1	TF
Zjn_sc00058.1.g02980.1.am.mkhc	PB.11913.2	FAR1	TF
Zjn_sc00058.1.g02980.1.am.mkhc	PB.11913.3	FAR1	TF
Zjn_sc00058.1.g02980.1.am.mkhc	PB.11913.4	FAR1	TF
Zjn_sc00058.1.g03630.1.am.mkhc	PB.11937.1	Trihelix	TF
Zjn_sc00059.1.g00100.1.sm.mk	PB.11951.1	Others	TR
Zjn_sc00059.1.g00370.1.am.mkhc	PB.11958.1	MYB-related	TF
Zjn_sc00059.1.g00370.1.am.mkhc	PB.11958.2	MYB-related	TF
Zjn_sc00059.1.g00490.1.am.mk	PB.11962.1	Trihelix	TF
Zjn_sc00059.1.g01230.1.am.mk	PB.11978.1	PLATZ	TF
Zjn_sc00059.1.g01230.1.am.mk	PB.11978.2	PLATZ	TF
Zjn_sc00059.1.g01230.1.am.mk	PB.11978.3	PLATZ	TF
Zjn_sc00059.1.g01300.1.sm.mk	PB.11980.1	bHLH	TF
Zjn_sc00059.1.g01340.1.am.mk	PB.11982.1	HB-HD-ZIP	TF
Zjn_sc00059.1.g01610.1.am.mkhc	PB.11992.1	Jumonji	TR
Zjn_sc00059.1.g01610.1.am.mkhc	PB.11992.2	Jumonji	TR
Zjn_sc00003.1.g04560.1.am.mk	PB.1201.1	C2H2	TF
Zjn_sc00060.1.g00520.1.sm.mkhc	PB.12032.1	FAR1	TF
Zjn_sc00060.1.g00520.1.sm.mkhc	PB.12032.3	FAR1	TF
Zjn_sc00060.1.g01210.1.am.mk	PB.12052.1	MYB	TF
Zjn_sc00060.1.g01660.1.am.mk	PB.12069.1	mTERF	TR
Zjn_sc00061.1.g00060.1.sm.mkhc	PB.12092.1	Jumonji	TR
Zjn_sc00061.1.g00060.1.sm.mkhc	PB.12092.2	Jumonji	TR
Zjn_sc00061.1.g00060.1.sm.mkhc	PB.12092.4	Jumonji	TR
Zjn_sc00061.1.g00610.1.am.mkhc	PB.12101.1	C3H	TF
Zjn_sc00061.1.g01420.1.am.mk	PB.12121.1	bHLH	TF
Zjn_sc00063.1.g00550.1.am.mkhc	PB.12156.1	HB-HD-ZIP	TF
Zjn_sc00063.1.g00550.1.am.mkhc	PB.12156.2	HB-HD-ZIP	TF
Zjn_sc00063.1.g00550.1.am.mkhc	PB.12156.3	HB-HD-ZIP	TF
Zjn_sc00003.1.g05050.1.cf.mkhc	PB.1216.2	GRAS	TF
Zjn_sc00003.1.g05050.1.cf.mkhc	PB.1216.3	GRAS	TF
Zjn_sc00003.1.g05050.1.cf.mkhc	PB.1216.4	GRAS	TF
Zjn_sc00063.1.g00810.1.sm.mkhc	PB.12160.1	SET	TR
Zjn_sc00063.1.g01730.1.sm.mkhc	PB.12183.10	MYB-related	TF
Zjn_sc00063.1.g01730.1.sm.mkhc	PB.12183.11	MYB-related	TF
Zjn_sc00063.1.g01730.1.sm.mkhc	PB.12183.12	MYB-related	TF
Zjn_sc00063.1.g01730.1.sm.mkhc	PB.12183.13	MYB-related	TF
Zjn_sc00063.1.g01730.1.sm.mkhc	PB.12183.16	MYB-related	TF
Zjn_sc00063.1.g01730.1.sm.mkhc	PB.12183.17	MYB-related	TF
Zjn_sc00063.1.g01730.1.sm.mkhc	PB.12183.18	MYB-related	TF
Zjn_sc00063.1.g01730.1.sm.mkhc	PB.12183.19	MYB-related	TF
Zjn_sc00063.1.g01730.1.sm.mkhc	PB.12183.21	MYB-related	TF
Zjn_sc00063.1.g01730.1.sm.mkhc	PB.12183.24	MYB-related	TF
Zjn_sc00063.1.g01730.1.sm.mkhc	PB.12183.26	MYB-related	TF
Zjn_sc00063.1.g01730.1.sm.mkhc	PB.12183.27	MYB-related	TF
Zjn_sc00063.1.g01730.1.sm.mkhc	PB.12183.28	MYB-related	TF
Zjn_sc00063.1.g01730.1.sm.mkhc	PB.12183.29	MYB-related	TF
Zjn_sc00063.1.g01730.1.sm.mkhc	PB.12183.3	MYB-related	TF
Zjn_sc00063.1.g01730.1.sm.mkhc	PB.12183.30	MYB-related	TF
Zjn_sc00063.1.g01730.1.sm.mkhc	PB.12183.31	MYB-related	TF
Zjn_sc00063.1.g01730.1.sm.mkhc	PB.12183.32	MYB-related	TF
Zjn_sc00063.1.g01730.1.sm.mkhc	PB.12183.34	MYB-related	TF
Zjn_sc00063.1.g01730.1.sm.mkhc	PB.12183.35	MYB-related	TF
Zjn_sc00063.1.g01730.1.sm.mkhc	PB.12183.36	MYB-related	TF
Zjn_sc00063.1.g01730.1.sm.mkhc	PB.12183.37	MYB-related	TF
Zjn_sc00063.1.g01730.1.sm.mkhc	PB.12183.38	MYB-related	TF
Zjn_sc00063.1.g01730.1.sm.mkhc	PB.12183.39	MYB-related	TF
Zjn_sc00063.1.g01730.1.sm.mkhc	PB.12183.40	MYB-related	TF
Zjn_sc00063.1.g01730.1.sm.mkhc	PB.12183.42	MYB-related	TF
Zjn_sc00063.1.g01730.1.sm.mkhc	PB.12183.45	MYB-related	TF
Zjn_sc00063.1.g01730.1.sm.mkhc	PB.12183.46	MYB-related	TF
Zjn_sc00063.1.g01730.1.sm.mkhc	PB.12183.47	MYB-related	TF
Zjn_sc00063.1.g01730.1.sm.mkhc	PB.12183.48	MYB-related	TF
Zjn_sc00063.1.g01730.1.sm.mkhc	PB.12183.49	MYB-related	TF
Zjn_sc00063.1.g01730.1.sm.mkhc	PB.12183.5	MYB-related	TF
Zjn_sc00063.1.g01730.1.sm.mkhc	PB.12183.50	MYB-related	TF
Zjn_sc00063.1.g01730.1.sm.mkhc	PB.12183.51	MYB-related	TF
Zjn_sc00063.1.g01730.1.sm.mkhc	PB.12183.52	MYB-related	TF
Zjn_sc00063.1.g01730.1.sm.mkhc	PB.12183.54	MYB-related	TF
Zjn_sc00063.1.g01730.1.sm.mkhc	PB.12183.55	MYB-related	TF
Zjn_sc00063.1.g01730.1.sm.mkhc	PB.12183.56	MYB-related	TF
Zjn_sc00063.1.g01730.1.sm.mkhc	PB.12183.58	MYB-related	TF
Zjn_sc00063.1.g01730.1.sm.mkhc	PB.12183.59	MYB-related	TF
Zjn_sc00063.1.g01730.1.sm.mkhc	PB.12183.6	MYB-related	TF
Zjn_sc00063.1.g01730.1.sm.mkhc	PB.12183.60	MYB-related	TF
Zjn_sc00063.1.g01730.1.sm.mkhc	PB.12183.61	MYB-related	TF
Zjn_sc00063.1.g01730.1.sm.mkhc	PB.12183.62	MYB-related	TF
Zjn_sc00063.1.g01730.1.sm.mkhc	PB.12183.67	MYB-related	TF
Zjn_sc00063.1.g01730.1.sm.mkhc	PB.12183.7	MYB-related	TF
Zjn_sc00063.1.g01730.1.sm.mkhc	PB.12183.8	MYB-related	TF
Zjn_sc00063.1.g01730.1.sm.mkhc	PB.12183.9	MYB-related	TF
Zjn_sc00063.1.g02260.1.am.mk	PB.12198.1	MYB-related	TF
Zjn_sc00063.1.g02580.1.am.mkhc	PB.12205.1	bHLH	TF
Zjn_sc00063.1.g02700.1.am.mk	PB.12210.1	HB-HD-ZIP	TF
Zjn_sc00064.1.g00200.1.am.mk	PB.12243.1	PLATZ	TF
Zjn_sc00064.1.g00200.1.am.mk	PB.12243.2	PLATZ	TF
Zjn_sc00064.1.g00200.1.am.mk	PB.12243.3	PLATZ	TF
Zjn_sc00064.1.g00260.1.es.mkhc	PB.12247.1	bHLH	TF
Zjn_sc00064.1.g00260.1.es.mkhc	PB.12247.2	bHLH	TF
Zjn_sc00065.1.g00040.1.sm.mkhc	PB.12286.2	TRAF	TR
Zjn_sc00065.1.g00040.1.sm.mkhc	PB.12286.3	TRAF	TR
Zjn_sc00065.1.g00040.1.sm.mkhc	PB.12286.5	TRAF	TR
Zjn_sc00065.1.g01000.1.am.mk	PB.12317.1	NF-YA	TF
Zjn_sc00003.1.g05400.1.am.mk	PB.1232.1	Others	TR
Zjn_sc00065.1.g01230.1.sm.mkhc	PB.12325.1	MADS-M-type	TF
[truncated: 7,619 more rows]

## Sheet: Vlookup (3)
#ID				regulated	FDR
[truncated: 539 more rows]

## Sheet: Sheet2
#ID	TF family	Regulated	FDR
[truncated: 539 more rows]
