# Supplementary material
Source: MDPI journal article supplement (https://www.mdpi.com/2073-4395/13/3/623)

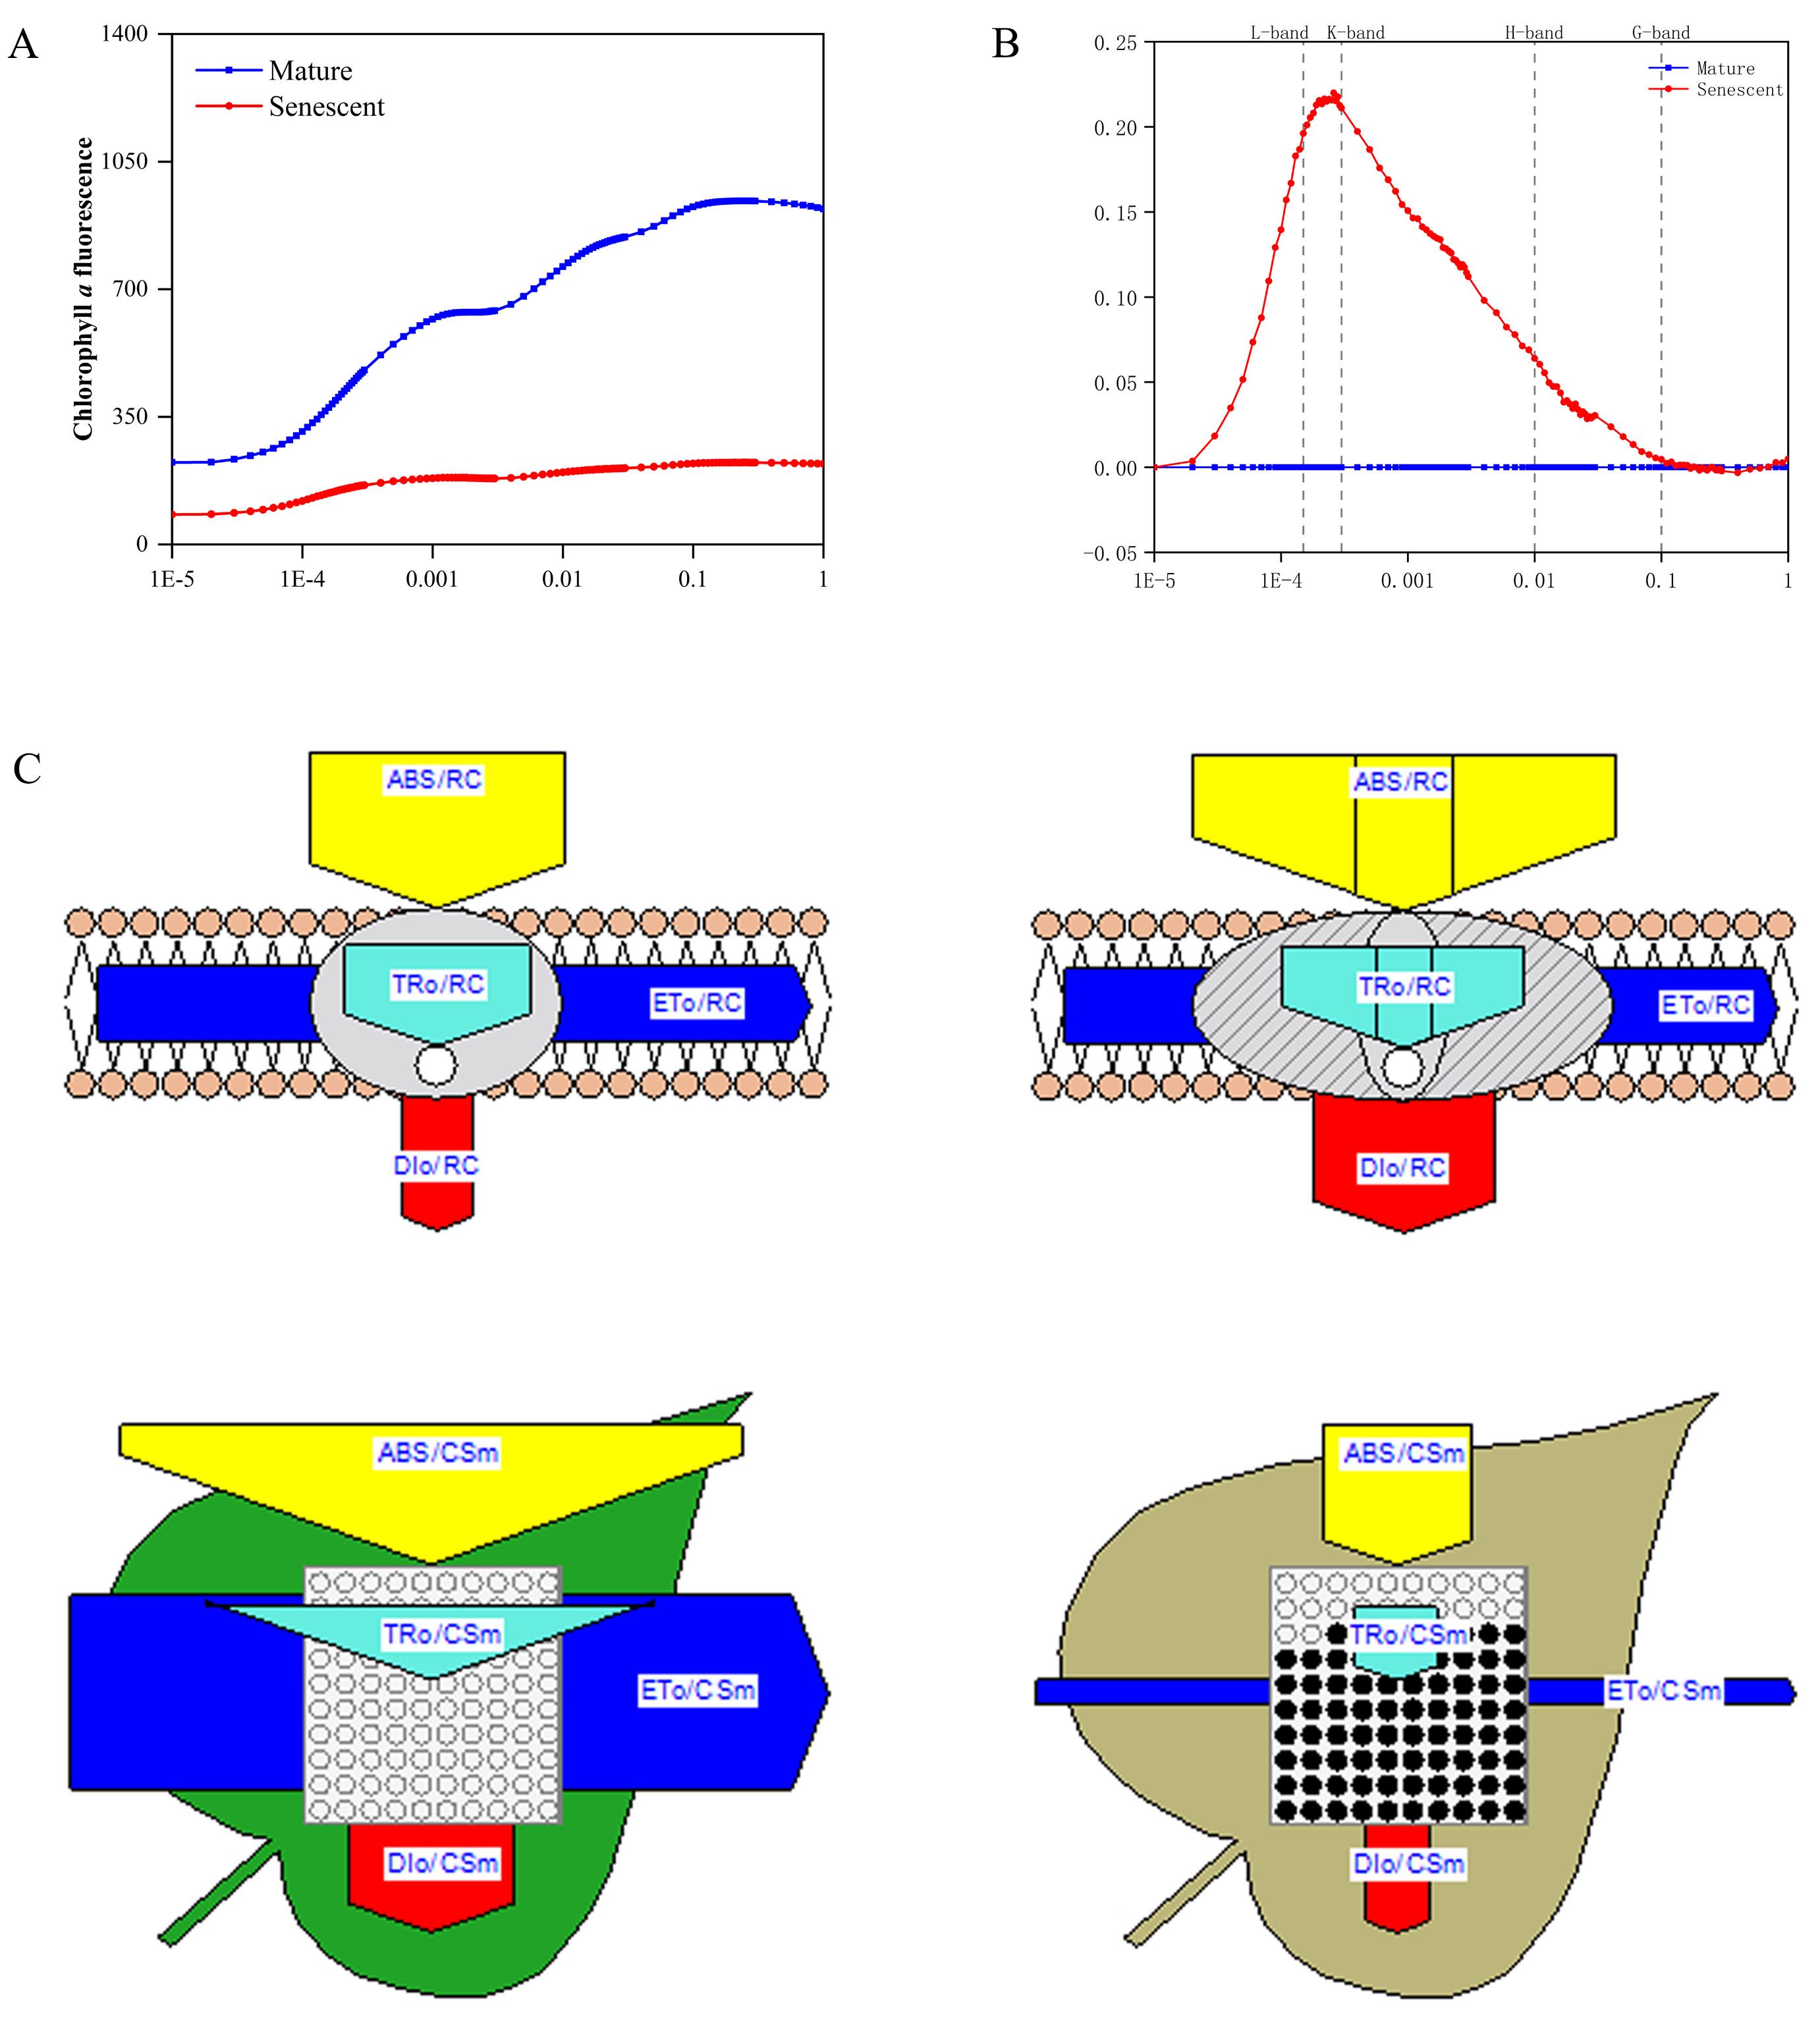

Supplement: s1 [file s1 › Figure S1.jpg]
